# Supplementary material for: Distinct transcriptomic and epigenomic responses of mature oligodendrocytes during disease progression in a mouse model of multiple sclerosis
Source: Nat Neurosci. 2025 Nov 17;28(12):2612–27. doi: 10.1038/s41593-025-02100-3 (PMC12672374; doi:10.1038/s41593-025-02100-3)
Supplement: Supplementary file 3 — Differential gene expression and chromatin accessibility, IFNγ doses, bulk RNA-seq and bulk ATAC-seq. [file 41593_2025_2100_MOESM3_ESM.xlsx]

## Sheet: Summary
Supplementary Table 1. Differential gene expression and chromatin accessibility IFN alpha doses bulk RNAseq and bulk ATACseq
Selected_TSS_windows	Selected_TSS_windows_with_RNA_increase_upon_2nd_dose. In yellow the genes that have a significant increase of expression upon 2nd IFN-g dose. All genes without change in chromatin accessibility.
TSS_windows_all_nochange	Selected_TSS_windows_with_epigenetic_memory. All genes without change in chromatin accessibility.
Enhancer_windows_selected	Selected_enhancer_regions_of_genes_with_RNA_increase_upon_2nd_dose. In yellow the genes that have a significant increase of expression upon 2nd IFN-g dose. All genes without change in chromatin accessibility.
Enhancer_windows_nochange	Selected_enhancer_regions_of_genes_with_epigenetic_memory. All genes without change in chromatin accessibility.
All TSS windows and enhancer regions have a p-val > 0.05, BH FDR > 0.05 and a logFC < abs(0.5) for the differential chromatin accessibility comparison IFN-g 24h (+0h) vs. IFN-g 24h (+96h)
			"logFC" IFN-g 24h (+0h) vs. Ctrl	RNA logFC IFN-g 24h (+0h) vs. Ctrl
			"logCPM" IFN-g 24h (+0h) vs. Ctrl	RNA CPM IFN-g 24h (+0h) vs. Ctrl
			"PValue" IFN-g 24h (+0h) vs. Ctrl	p-val RNA IFN-g 24h (+0h) vs. Ctrl
			"FDR" IFN-g 24h (+0h) vs. Ctrl	BH FDR RNA IFN-g 24h (+0h) vs. Ctrl
			GeneSymbol	gene symbol
			ENS_102	Ensembl 102 gene annotation
			TSS_window	TSS window ID
			ATAC_logFC	ATAC logFC IFN-g 24h (+0h) vs. IFN-g 24h (+96h)
			RNA_llfc_2nd_dose	RNA logFC IFN-g 24h (+96h) vs. 2x IFN-g (24h)
			RNA_FDR_2nd_dose	RNA BH FDR IFN-g 24h (+96h) vs. 2x IFN-g (24h)
			TSS_window	Unique ID for the TSS region
			TSSwindow_chr	chr for TSS window
			TSS_window_start	start of the TSS window
			TSS_window_end	end of the TSS window
			Enh_region_ID	Unique ID for the defined enhancer region
			Enh_region_chr	chr for defined enhancer region
			Enh_region_start	start of the defined enhancer region
			Enh_region_end	end of the defined enhancer region

## Sheet: Selected_TSS_windows
	"logFC" RNA IFN-g 24h (+0h) vs. Ctrl	"logCPM" RNA IFN-g 24h (+0h) vs. Ctrl	"PValue" RNA IFN-g 24h (+0h) vs. Ctrl	"FDR" RNA IFN-g 24h (+0h) vs. Ctrl	GeneSymbol	ENS_102		TSS_window	ATAC_logFC	RNA_llfc_2n_dose	RNA_FDR_2nd_dose	TSSwindow_chr	TSS_window_start	TSS_window_end
ENSMUSG00000015090	0.874076	3.62708	1.54635e-07	5.66805e-06	Ptgds	ENSMUSG00000015090	Ptgds	ENSMUSG00000015090:Ptgds	0.178154	-1.66714	0.000275675	chr2	25468657	25469657
ENSMUSG00000015090	0.874076	3.62708	1.54635e-07	5.66805e-06	Ptgds	ENSMUSG00000015090	Ptgds	ENSMUSG00000015090:Ptgds.1	0.0638698	-1.66714	0.000275675	chr2	25468883	25469883
ENSMUSG00000015090	0.874076	3.62708	1.54635e-07	5.66805e-06	Ptgds	ENSMUSG00000015090	Ptgds	ENSMUSG00000015090:Ptgds.2	0.0244401	-1.66714	0.000275675	chr2	25469249	25470249
ENSMUSG00000015090	0.874076	3.62708	1.54635e-07	5.66805e-06	Ptgds	ENSMUSG00000015090	Ptgds	ENSMUSG00000015090:Ptgds.3	0.0375896	-1.66714	0.000275675	chr2	25469342	25470342
ENSMUSG00000015090	0.874076	3.62708	1.54635e-07	5.66805e-06	Ptgds	ENSMUSG00000015090	Ptgds	ENSMUSG00000015090:Ptgds.4	0.0639027	-1.66714	0.000275675	chr2	25469546	25470546
ENSMUSG00000024261	1.98011	4.74459	1.8182e-60	5.06746e-58	Syt4	ENSMUSG00000024261	Syt4	ENSMUSG00000024261:Syt4	0.128521	-1.22682	0.000308253	chr18	31446906	31447906
ENSMUSG00000072941	2.07434	2.40764	0.0190302	0.192059	Sod3	ENSMUSG00000072941	Sod3	ENSMUSG00000072941:Sod3	0.174922	-1.27799	0.00346946	chr5	52363269	52364269
ENSMUSG00000041309	1.84062	2.86357	7.36471e-17	6.81429e-15	Nkx6-2	ENSMUSG00000041309	Nkx6-2	ENSMUSG00000041309:Nkx6-2	0.12665	-1.19449	0.0114806	chr7	139582294	139583294
ENSMUSG00000060675	2.76866	4.42742	1.40905e-28	2.29198e-26	Plaat3	ENSMUSG00000060675	Pla2g16	ENSMUSG00000060675:Plaat3	0.177088	-0.709378	0.0419215	chr19	7556950	7557950
ENSMUSG00000027533	0.605648	7.67763	0.00860096	0.101591	Fabp5	ENSMUSG00000027533	Fabp5	ENSMUSG00000027533:Fabp5	0.0534863	-0.682236	0.0515097	chr3	10012026	10013026
ENSMUSG00000027533	0.605648	7.67763	0.00860096	0.101591	Fabp5	ENSMUSG00000027533	Fabp5	ENSMUSG00000027533:Fabp5.1	0.0456484	-0.682236	0.0515097	chr3	10012083	10013083
ENSMUSG00000032060	0.571353	3.25983	0.00280513	0.0398932	Cryab	ENSMUSG00000032060	Cryab	ENSMUSG00000032060:Cryab.2	0.128894	-0.930963	0.0577746	chr9	50752385	50753385
ENSMUSG00000032060	0.571353	3.25983	0.00280513	0.0398932	Cryab	ENSMUSG00000032060	Cryab	ENSMUSG00000032060:Cryab.3	0.13322	-0.930963	0.0577746	chr9	50752484	50753484
ENSMUSG00000032060	0.571353	3.25983	0.00280513	0.0398932	Cryab	ENSMUSG00000032060	Cryab	ENSMUSG00000032060:Cryab.4	0.399187	-0.930963	0.0577746	chr9	50753873	50754873
ENSMUSG00000030761	0.514614	4.14771	0.00924372	0.107756	Myo7a	ENSMUSG00000030761	Myo7a	ENSMUSG00000030761:Myo7a.10	0.435946	-0.83846	0.0577746	chr7	98119024	98120024
ENSMUSG00000030761	0.514614	4.14771	0.00924372	0.107756	Myo7a	ENSMUSG00000030761	Myo7a	ENSMUSG00000030761:Myo7a.4	0.268638	-0.83846	0.0577746	chr7	98102859	98103859
ENSMUSG00000030761	0.514614	4.14771	0.00924372	0.107756	Myo7a	ENSMUSG00000030761	Myo7a	ENSMUSG00000030761:Myo7a.9	0.473181	-0.83846	0.0577746	chr7	98118998	98119998
ENSMUSG00000016356	1.12024	4.93316	0.00052744	0.00949516	Col20a1	ENSMUSG00000016356	Col20a1	ENSMUSG00000016356:Col20a1	0.309938	-1.15855	0.0765684	chr2	180986013	180987013
ENSMUSG00000073421	8.20634	7.00431	0	0	H2-Ab1	ENSMUSG00000073421	H2-Ab1	ENSMUSG00000073421:H2-Ab1.1	0.415735	-0.657489	0.0765684	chr17	34262713	34263713
ENSMUSG00000073421	8.20634	7.00431	0	0	H2-Ab1	ENSMUSG00000073421	H2-Ab1	ENSMUSG00000073421:H2-Ab1.2	0.411902	-0.657489	0.0765684	chr17	34262809	34263809
ENSMUSG00000017756	3.80819	5.36603	2.37138e-232	1.4262e-229	Slc12a7	ENSMUSG00000017756	Slc12a7	ENSMUSG00000017756:Slc12a7.1	0.0609759	-0.690126	0.104163	chr13	73763196	73764196
ENSMUSG00000067276	2.19496	2.76634	2.48376e-23	3.3588e-21	Capn6	ENSMUSG00000067276	Capn6	ENSMUSG00000067276:Capn6	0.301774	-0.90594	0.145686	chrX	143826832	143827832
ENSMUSG00000067276	2.19496	2.76634	2.48376e-23	3.3588e-21	Capn6	ENSMUSG00000067276	Capn6	ENSMUSG00000067276:Capn6.1	0.340274	-0.90594	0.145686	chrX	143826914	143827914
ENSMUSG00000021190	0.580883	6.10409	6.51201e-09	2.92337e-07	Lgmn	ENSMUSG00000021190	Lgmn	ENSMUSG00000021190:Lgmn.2	0.0864501	-0.638727	0.145686	chr12	102439313	102440313
ENSMUSG00000045827	4.05575	2.73408	8.99548e-56	2.36302e-53	Serpinb9	ENSMUSG00000045827	Serpinb9	ENSMUSG00000045827:Serpinb9.1	0.437711	-0.807379	0.159309	chr13	33004019	33005019
ENSMUSG00000035547	0.992611	6.30064	1.1352e-29	1.93612e-27	Capn5	ENSMUSG00000035547	Capn5	ENSMUSG00000035547:Capn5.4	0.0706993	-0.857838	0.217525	chr7	98177774	98178774
ENSMUSG00000039007	0.682295	4.17533	2.53684e-07	8.88537e-06	Cpq	ENSMUSG00000039007	Cpq	ENSMUSG00000039007:Cpq	0.306724	-0.728734	0.278584	chr15	33082629	33083629
ENSMUSG00000039007	0.682295	4.17533	2.53684e-07	8.88537e-06	Cpq	ENSMUSG00000039007	Cpq	ENSMUSG00000039007:Cpq.1	0.335885	-0.728734	0.278584	chr15	33082738	33083738
ENSMUSG00000020357	2.00648	0.444742	2.06537e-06	6.17828e-05	Flt4	ENSMUSG00000020357	Flt4	ENSMUSG00000020357:Flt4	0.0859567	-1.55858	0.3276	chr11	49608741	49609741
ENSMUSG00000022037	0.934494	4.81856	2.27053e-09	1.09822e-07	Clu	ENSMUSG00000022037	Clu	ENSMUSG00000022037:Clu	0.117933	-0.563289	0.349075	chr14	65967961	65968961
ENSMUSG00000022037	0.934494	4.81856	2.27053e-09	1.09822e-07	Clu	ENSMUSG00000022037	Clu	ENSMUSG00000022037:Clu.1	0.0833578	-0.563289	0.349075	chr14	65968126	65969126
ENSMUSG00000070427	4.01165	5.18252	1.11768e-88	3.84112e-86	Il18bp	ENSMUSG00000070427	Il18bp	ENSMUSG00000070427:Il18bp.2	0.248282	-0.528386	0.397292	chr7	102018190	102019190
ENSMUSG00000041992	1.00906	2.60363	5.58085e-06	0.000153668	Rapgef5	ENSMUSG00000041992	Rapgef5	ENSMUSG00000041992:Rapgef5.1	0.249115	-0.813271	0.431983	chr12	117533366	117534366
ENSMUSG00000041992	1.00906	2.60363	5.58085e-06	0.000153668	Rapgef5	ENSMUSG00000041992	Rapgef5	ENSMUSG00000041992:Rapgef5.4	0.147624	-0.813271	0.431983	chr12	117688314	117689314
ENSMUSG00000041992	1.00906	2.60363	5.58085e-06	0.000153668	Rapgef5	ENSMUSG00000041992	Rapgef5	ENSMUSG00000041992:Rapgef5.5	0.103517	-0.813271	0.431983	chr12	117688434	117689434
ENSMUSG00000031216	1.30278	2.18316	2.25569e-07	7.98631e-06	Stard8	ENSMUSG00000031216	Stard8	ENSMUSG00000031216:Stard8.1	0.101304	-0.852609	0.473197	chrX	99042059	99043059
ENSMUSG00000060802	5.90537	9.55236	0	0	B2m	ENSMUSG00000060802	B2m	ENSMUSG00000060802:B2m	0.176189	-0.538734	0.495489	chr2	122147164	122148164
ENSMUSG00000037649	5.00431	5.63023	0	0	H2-DMa	ENSMUSG00000037649	H2-DMa	ENSMUSG00000037649:H2-DMa	0.250785	-0.500945	0.521447	chr17	34119042	34120042
ENSMUSG00000037649	5.00431	5.63023	0	0	H2-DMa	ENSMUSG00000037649	H2-DMa	ENSMUSG00000037649:H2-DMa.1	0.188969	-0.500945	0.521447	chr17	34122312	34123312
ENSMUSG00000037649	5.00431	5.63023	0	0	H2-DMa	ENSMUSG00000037649	H2-DMa	ENSMUSG00000037649:H2-DMa.2	0.296472	-0.500945	0.521447	chr17	34135119	34136119
ENSMUSG00000050534	5.35617	0.548788	9.59696e-22	1.19201e-19	Htr5b	ENSMUSG00000050534	Htr5b	ENSMUSG00000050534:Htr5b	0.248383	-1.08947	0.523431	chr1	121527965	121528965
ENSMUSG00000054728	1.61531	5.96882	5.18084e-68	1.52778e-65	Phactr1	ENSMUSG00000054728	Phactr1	ENSMUSG00000054728:Phactr1.4	0.418231	-0.489295	0.617718	chr13	42709040	42710040
ENSMUSG00000054728	1.61531	5.96882	5.18084e-68	1.52778e-65	Phactr1	ENSMUSG00000054728	Phactr1	ENSMUSG00000054728:Phactr1.6	0.119755	-0.489295	0.617718	chr13	42866312	42867312
ENSMUSG00000054728	1.61531	5.96882	5.18084e-68	1.52778e-65	Phactr1	ENSMUSG00000054728	Phactr1	ENSMUSG00000054728:Phactr1.7	0.0128377	-0.489295	0.617718	chr13	42916129	42917129
ENSMUSG00000054728	1.61531	5.96882	5.18084e-68	1.52778e-65	Phactr1	ENSMUSG00000054728	Phactr1	ENSMUSG00000054728:Phactr1.9	0.20447	-0.489295	0.617718	chr13	43122342	43123342
ENSMUSG00000031548	2.32963	5.29431	8.1679e-09	3.60365e-07	Sfrp1	ENSMUSG00000031548	Sfrp1	ENSMUSG00000031548:Sfrp1	0.352633	-0.48649	0.660155	chr8	23410980	23411980
ENSMUSG00000003617	0.841861	3.7072	1.17541e-06	3.70266e-05	Cp	ENSMUSG00000003617	Cp	ENSMUSG00000003617:Cp	0.236653	-0.63396	0.737096	chr3	19956560	19957560
ENSMUSG00000003617	0.841861	3.7072	1.17541e-06	3.70266e-05	Cp	ENSMUSG00000003617	Cp	ENSMUSG00000003617:Cp.1	0.224461	-0.63396	0.737096	chr3	19956697	19957697
ENSMUSG00000003617	0.841861	3.7072	1.17541e-06	3.70266e-05	Cp	ENSMUSG00000003617	Cp	ENSMUSG00000003617:Cp.2	0.220243	-0.63396	0.737096	chr3	19956762	19957762
ENSMUSG00000016206	4.90671	3.46609	2.29567e-106	8.53092e-104	H2-M3	ENSMUSG00000016206	H2-M3	ENSMUSG00000016206:H2-M3	0.398456	-0.615131	0.755955	chr17	37269698	37270698
ENSMUSG00000020932	1.16502	5.5651	0.0200936	0.200227	Gfap	ENSMUSG00000020932	Gfap	ENSMUSG00000020932:Gfap.2	0.0146966	-0.498353	0.789004	chr11	102900412	102901412
ENSMUSG00000029814	1.24423	3.48754	8.5431e-12	5.37862e-10	Igf2bp3	ENSMUSG00000029814	Igf2bp3	ENSMUSG00000029814:Igf2bp3.2	0.267562	-0.940875	0.845026	chr6	49213661	49214661
ENSMUSG00000029814	1.24423	3.48754	8.5431e-12	5.37862e-10	Igf2bp3	ENSMUSG00000029814	Igf2bp3	ENSMUSG00000029814:Igf2bp3.3	0.391965	-0.940875	0.845026	chr6	49214204	49215204
ENSMUSG00000029814	1.24423	3.48754	8.5431e-12	5.37862e-10	Igf2bp3	ENSMUSG00000029814	Igf2bp3	ENSMUSG00000029814:Igf2bp3.4	0.442317	-0.940875	0.845026	chr6	49214457	49215457
ENSMUSG00000039106	4.993	0.299629	2.73165e-19	3.0014e-17	Htr5a	ENSMUSG00000039106	Htr5a	ENSMUSG00000039106:Htr5a	0.0582025	-1.11568	0.874237	chr5	27841627	27842627
ENSMUSG00000078566	0.674556	4.27581	1.11336e-07	4.1747e-06	Bnip3	ENSMUSG00000078566	Bnip3	ENSMUSG00000078566:Bnip3.1	0.0531862	-0.735143	0.889011	chr7	138908979	138909979
ENSMUSG00000078566	0.674556	4.27581	1.11336e-07	4.1747e-06	Bnip3	ENSMUSG00000078566	Bnip3	ENSMUSG00000078566:Bnip3.2	0.048468	-0.735143	0.889011	chr7	138908995	138909995
ENSMUSG00000078566	0.674556	4.27581	1.11336e-07	4.1747e-06	Bnip3	ENSMUSG00000078566	Bnip3	ENSMUSG00000078566:Bnip3.3	0.0358751	-0.735143	0.889011	chr7	138909006	138910006
ENSMUSG00000078566	0.674556	4.27581	1.11336e-07	4.1747e-06	Bnip3	ENSMUSG00000078566	Bnip3	ENSMUSG00000078566:Bnip3.4	0.0239943	-0.735143	0.889011	chr7	138909019	138910019
ENSMUSG00000045733	1.36869	2.11962	1.38489e-07	5.11312e-06	Sprn	ENSMUSG00000045733	Sprn	ENSMUSG00000045733:Sprn	0.00583074	-0.85079	0.926119	chr7	140153041	140154041
ENSMUSG00000045733	1.36869	2.11962	1.38489e-07	5.11312e-06	Sprn	ENSMUSG00000045733	Sprn	ENSMUSG00000045733:Sprn.1	0.365357	-0.85079	0.926119	chr7	140154377	140155377
ENSMUSG00000026896	4.92573	4.63959	4.09817e-218	2.34149e-215	Ifih1	ENSMUSG00000026896	Ifih1	ENSMUSG00000026896:Ifih1.1	0.260572	-0.451303	0.926435	chr2	62645656	62646656
ENSMUSG00000026896	4.92573	4.63959	4.09817e-218	2.34149e-215	Ifih1	ENSMUSG00000026896	Ifih1	ENSMUSG00000026896:Ifih1.2	0.266956	-0.451303	0.926435	chr2	62645711	62646711
ENSMUSG00000026896	4.92573	4.63959	4.09817e-218	2.34149e-215	Ifih1	ENSMUSG00000026896	Ifih1	ENSMUSG00000026896:Ifih1.3	0.274309	-0.451303	0.926435	chr2	62645755	62646755
ENSMUSG00000043629	1.55176	2.9921	2.2888e-15	1.8918e-13	1700019D03Rik	ENSMUSG00000043629	1700019D03Rik	ENSMUSG00000043629:1700019D03Rik	0.266163	-0.770009	0.930016	chr1	52952344	52953344
ENSMUSG00000043629	1.55176	2.9921	2.2888e-15	1.8918e-13	1700019D03Rik	ENSMUSG00000043629	1700019D03Rik	ENSMUSG00000043629:1700019D03Rik.1	0.294095	-0.770009	0.930016	chr1	52952850	52953850
ENSMUSG00000043629	1.55176	2.9921	2.2888e-15	1.8918e-13	1700019D03Rik	ENSMUSG00000043629	1700019D03Rik	ENSMUSG00000043629:1700019D03Rik.3	0.0279057	-0.770009	0.930016	chr1	52971546	52972546
ENSMUSG00000033880	4.8526	5.57184	4.21394e-08	1.67197e-06	Lgals3bp	ENSMUSG00000033880	Lgals3bp	ENSMUSG00000033880:Lgals3bp.1	0.469591	-0.452269	0.933772	chr11	118400538	118401538
ENSMUSG00000033308	0.553793	3.52034	0.00553605	0.0707611	Dpyd	ENSMUSG00000033308	Dpyd	ENSMUSG00000033308:Dpyd	0.0335417	-0.692472	0.97431	chr3	118561635	118562635
ENSMUSG00000042757	0.934885	6.40504	2.63863e-27	4.08835e-25	Tmem108	ENSMUSG00000042757	Tmem108	ENSMUSG00000042757:Tmem108.2	0.156155	-0.467212	0.989239	chr9	103761292	103762292
ENSMUSG00000042757	0.934885	6.40504	2.63863e-27	4.08835e-25	Tmem108	ENSMUSG00000042757	Tmem108	ENSMUSG00000042757:Tmem108.3	0.159949	-0.467212	0.989239	chr9	103761333	103762333
ENSMUSG00000001663	0.660818	2.3808	0.00555998	0.0709282	Gstt1	ENSMUSG00000001663	Gstt1	ENSMUSG00000001663:Gstt1.2	0.345683	-0.76122	0.995906	chr10	75798084	75799084
ENSMUSG00000092216	4.30333	-3.60163	0.0144074	0.153612	Gm19345	ENSMUSG00000092216	Gm19345	ENSMUSG00000092216:Gm19345	0.00694099	-1.98703	1	chr7	19851481	19852481
ENSMUSG00000034570	0.694282	3.70595	4.57477e-05	0.0010609	Inpp5j	ENSMUSG00000034570	Inpp5j	ENSMUSG00000034570:Inpp5j.1	0.431689	-1.23009	1	chr11	3504273	3505273
ENSMUSG00000034570	0.694282	3.70595	4.57477e-05	0.0010609	Inpp5j	ENSMUSG00000034570	Inpp5j	ENSMUSG00000034570:Inpp5j.2	0.445447	-1.23009	1	chr11	3504286	3505286
ENSMUSG00000051041	1.04652	-0.152185	0.0204054	0.202319	Olfml1	ENSMUSG00000051041	Olfml1	ENSMUSG00000051041:Olfml1	0.248782	-1.17594	1	chr7	107566924	107567924
ENSMUSG00000051041	1.04652	-0.152185	0.0204054	0.202319	Olfml1	ENSMUSG00000051041	Olfml1	ENSMUSG00000051041:Olfml1.1	0.304916	-1.17594	1	chr7	107567244	107568244
ENSMUSG00000068105	2.52969	-0.490023	7.71157e-07	2.51592e-05	Tnfrsf13c	ENSMUSG00000068105	Tnfrsf13c	ENSMUSG00000068105:Tnfrsf13c	0.0398999	-1.06625	1	chr15	82223802	82224802
ENSMUSG00000068105	2.52969	-0.490023	7.71157e-07	2.51592e-05	Tnfrsf13c	ENSMUSG00000068105	Tnfrsf13c	ENSMUSG00000068105:Tnfrsf13c.1	0.0512363	-1.06625	1	chr15	82223839	82224839
ENSMUSG00000068105	2.52969	-0.490023	7.71157e-07	2.51592e-05	Tnfrsf13c	ENSMUSG00000068105	Tnfrsf13c	ENSMUSG00000068105:Tnfrsf13c.2	0.0775834	-1.06625	1	chr15	82223853	82224853
ENSMUSG00000068105	2.52969	-0.490023	7.71157e-07	2.51592e-05	Tnfrsf13c	ENSMUSG00000068105	Tnfrsf13c	ENSMUSG00000068105:Tnfrsf13c.3	0.0989016	-1.06625	1	chr15	82223869	82224869
ENSMUSG00000028864	2.02139	0.342125	1.10897e-06	3.51406e-05	Hgf	ENSMUSG00000028864	Hgf	ENSMUSG00000028864:Hgf	0.207657	-1.063	1	chr5	16553015	16554015
ENSMUSG00000028864	2.02139	0.342125	1.10897e-06	3.51406e-05	Hgf	ENSMUSG00000028864	Hgf	ENSMUSG00000028864:Hgf.1	0.197946	-1.063	1	chr5	16553246	16554246
ENSMUSG00000028864	2.02139	0.342125	1.10897e-06	3.51406e-05	Hgf	ENSMUSG00000028864	Hgf	ENSMUSG00000028864:Hgf.2	0.306771	-1.063	1	chr5	16553406	16554406
ENSMUSG00000027840	2.1636	0.540681	1.0765e-06	3.41462e-05	Wnt2b	ENSMUSG00000027840	Wnt2b	ENSMUSG00000027840:Wnt2b	0.10348	-1.04357	1	chr3	104961221	104962221
ENSMUSG00000027840	2.1636	0.540681	1.0765e-06	3.41462e-05	Wnt2b	ENSMUSG00000027840	Wnt2b	ENSMUSG00000027840:Wnt2b.1	0.121978	-1.04357	1	chr3	104961421	104962421
ENSMUSG00000097804	9.28324	0.0885554	3.51284e-23	4.70865e-21	Gm16685	ENSMUSG00000097804	Gm16685	ENSMUSG00000097804:Gm16685	0.137145	-0.946375	1	chr3	7612183	7613183
ENSMUSG00000026980	2.57778	1.15791	2.4435e-12	1.62337e-10	Ly75	ENSMUSG00000026980	Ly75	ENSMUSG00000026980:Ly75	0.0715141	-0.832973	1	chr2	60382731	60383731
ENSMUSG00000026980	2.57778	1.15791	2.4435e-12	1.62337e-10	Ly75	ENSMUSG00000026980	Ly75	ENSMUSG00000026980:Ly75.1	0.0798853	-0.832973	1	chr2	60382803	60383803
ENSMUSG00000038059	0.918817	2.29851	0.00289903	0.0409443	Smim3	ENSMUSG00000038059	Smim3	ENSMUSG00000038059:Smim3	0.0768004	-0.78722	1	chr18	60501076	60502076
ENSMUSG00000038059	0.918817	2.29851	0.00289903	0.0409443	Smim3	ENSMUSG00000038059	Smim3	ENSMUSG00000038059:Smim3.1	0.0509378	-0.78722	1	chr18	60501487	60502487
ENSMUSG00000074892	0.761177	3.75436	6.56369e-07	2.16616e-05	B3galt5	ENSMUSG00000074892	B3galt5	ENSMUSG00000074892:B3galt5.1	0.216357	-0.774797	1	chr16	96272952	96273952
ENSMUSG00000074892	0.761177	3.75436	6.56369e-07	2.16616e-05	B3galt5	ENSMUSG00000074892	B3galt5	ENSMUSG00000074892:B3galt5.2	0.129168	-0.774797	1	chr16	96273089	96274089
ENSMUSG00000074892	0.761177	3.75436	6.56369e-07	2.16616e-05	B3galt5	ENSMUSG00000074892	B3galt5	ENSMUSG00000074892:B3galt5.3	0.0892254	-0.774797	1	chr16	96280276	96281276
ENSMUSG00000090053	0.841053	1.38983	0.00680932	0.0838245	Pakap	ENSMUSG00000090053	Palm2	ENSMUSG00000090053:Pakap	0.180442	-0.772194	1	chr4	57433725	57434725
ENSMUSG00000090053	0.841053	1.38983	0.00680932	0.0838245	Pakap	ENSMUSG00000090053	Palm2	ENSMUSG00000090053:Pakap.1	0.287253	-0.772194	1	chr4	57567647	57568647
ENSMUSG00000090053	0.841053	1.38983	0.00680932	0.0838245	Pakap	ENSMUSG00000090053	Palm2	ENSMUSG00000090053:Pakap.2	0.310044	-0.772194	1	chr4	57567803	57568803
ENSMUSG00000090053	0.841053	1.38983	0.00680932	0.0838245	Pakap	ENSMUSG00000090053	Palm2	ENSMUSG00000090053:Pakap.3	0.28426	-0.772194	1	chr4	57637453	57638453
ENSMUSG00000042604	1.46865	1.71714	2.4494e-06	7.23238e-05	Kcna4	ENSMUSG00000042604	Kcna4	ENSMUSG00000042604:Kcna4	0.0856335	-0.758463	1	chr2	107290117	107291117
ENSMUSG00000042604	1.46865	1.71714	2.4494e-06	7.23238e-05	Kcna4	ENSMUSG00000042604	Kcna4	ENSMUSG00000042604:Kcna4.1	0.0385341	-0.758463	1	chr2	107290873	107291873
ENSMUSG00000035561	1.27275	2.39691	2.58565e-06	7.57595e-05	Aldh1b1	ENSMUSG00000035561	Aldh1b1	ENSMUSG00000035561:Aldh1b1	0.0751583	-0.730991	1	chr4	45798500	45799500
ENSMUSG00000035561	1.27275	2.39691	2.58565e-06	7.57595e-05	Aldh1b1	ENSMUSG00000035561	Aldh1b1	ENSMUSG00000035561:Aldh1b1.1	0.066454	-0.730991	1	chr4	45798599	45799599
ENSMUSG00000043456	0.849817	3.54029	1.76454e-07	6.38082e-06	Zfp536	ENSMUSG00000043456	Zfp536	ENSMUSG00000043456:Zfp536.2	0.00180311	-0.7147	1	chr7	37769124	37770124
ENSMUSG00000043456	0.849817	3.54029	1.76454e-07	6.38082e-06	Zfp536	ENSMUSG00000043456	Zfp536	ENSMUSG00000043456:Zfp536.3	0.0301053	-0.7147	1	chr7	37769462	37770462
ENSMUSG00000043456	0.849817	3.54029	1.76454e-07	6.38082e-06	Zfp536	ENSMUSG00000043456	Zfp536	ENSMUSG00000043456:Zfp536.4	0.147452	-0.7147	1	chr7	37770282	37771282
ENSMUSG00000043456	0.849817	3.54029	1.76454e-07	6.38082e-06	Zfp536	ENSMUSG00000043456	Zfp536	ENSMUSG00000043456:Zfp536.5	0.134164	-0.7147	1	chr7	37770480	37771480
ENSMUSG00000043456	0.849817	3.54029	1.76454e-07	6.38082e-06	Zfp536	ENSMUSG00000043456	Zfp536	ENSMUSG00000043456:Zfp536.6	0.345858	-0.7147	1	chr7	37772375	37773375
ENSMUSG00000026824	0.599438	3.94148	0.000272469	0.00529507	Kcnj3	ENSMUSG00000026824	Kcnj3	ENSMUSG00000026824:Kcnj3	0.209475	-0.686561	1	chr2	55435448	55436448
ENSMUSG00000026824	0.599438	3.94148	0.000272469	0.00529507	Kcnj3	ENSMUSG00000026824	Kcnj3	ENSMUSG00000026824:Kcnj3.1	0.0641511	-0.686561	1	chr2	55436638	55437638
ENSMUSG00000001773	0.851679	2.65069	6.74843e-05	0.0015032	Folh1	ENSMUSG00000001773	Folh1	ENSMUSG00000001773:Folh1.1	0.169389	-0.681703	1	chr7	86775308	86776308
ENSMUSG00000001773	0.851679	2.65069	6.74843e-05	0.0015032	Folh1	ENSMUSG00000001773	Folh1	ENSMUSG00000001773:Folh1.2	0.145126	-0.681703	1	chr7	86775443	86776443
ENSMUSG00000039717	1.23452	2.19857	8.41703e-07	2.71507e-05	Ralyl	ENSMUSG00000039717	Ralyl	ENSMUSG00000039717:Ralyl	0.0484256	-0.646447	1	chr3	13471146	13472146
ENSMUSG00000039717	1.23452	2.19857	8.41703e-07	2.71507e-05	Ralyl	ENSMUSG00000039717	Ralyl	ENSMUSG00000039717:Ralyl.1	0.0323415	-0.646447	1	chr3	13472698	13473698
ENSMUSG00000039717	1.23452	2.19857	8.41703e-07	2.71507e-05	Ralyl	ENSMUSG00000039717	Ralyl	ENSMUSG00000039717:Ralyl.3	0.179261	-0.646447	1	chr3	13945880	13946880
ENSMUSG00000027935	1.60206	2.97402	3.88555e-12	2.54807e-10	Rab13	ENSMUSG00000027935	Rab13	ENSMUSG00000027935:Rab13	0.152573	-0.616565	1	chr3	90213180	90214180
ENSMUSG00000027935	1.60206	2.97402	3.88555e-12	2.54807e-10	Rab13	ENSMUSG00000027935	Rab13	ENSMUSG00000027935:Rab13.1	0.11444	-0.616565	1	chr3	90220265	90221265
ENSMUSG00000054520	1.88597	1.76418	2.78388e-10	1.50054e-08	Sh3bp2	ENSMUSG00000054520	Sh3bp2	ENSMUSG00000054520:Sh3bp2	0.273005	-0.616428	1	chr5	34525320	34526320
ENSMUSG00000054520	1.88597	1.76418	2.78388e-10	1.50054e-08	Sh3bp2	ENSMUSG00000054520	Sh3bp2	ENSMUSG00000054520:Sh3bp2.2	0.0793734	-0.616428	1	chr5	34549054	34550054
ENSMUSG00000054520	1.88597	1.76418	2.78388e-10	1.50054e-08	Sh3bp2	ENSMUSG00000054520	Sh3bp2	ENSMUSG00000054520:Sh3bp2.3	0.164666	-0.616428	1	chr5	34549166	34550166
ENSMUSG00000022244	0.774735	2.84868	0.000113467	0.00240443	Amacr	ENSMUSG00000022244	Amacr	ENSMUSG00000022244:Amacr	0.0651226	-0.603762	1	chr15	10981234	10982234
ENSMUSG00000006567	1.55691	4.52041	3.21634e-15	2.62522e-13	Atp7b	ENSMUSG00000006567	Atp7b	ENSMUSG00000006567:Atp7b	0.147638	-0.566122	1	chr8	22059519	22060519
ENSMUSG00000006567	1.55691	4.52041	3.21634e-15	2.62522e-13	Atp7b	ENSMUSG00000006567	Atp7b	ENSMUSG00000006567:Atp7b.1	0.126987	-0.566122	1	chr8	22059805	22060805
ENSMUSG00000021091	3.39847	5.95754	8.46523e-168	4.29921e-165	Serpina3n	ENSMUSG00000021091	Serpina3n	ENSMUSG00000021091:Serpina3n	0.271413	-0.551769	1	chr12	104406207	104407207
ENSMUSG00000044447	0.539843	3.4707	0.0134247	0.145475	Dock5	ENSMUSG00000044447	Dock5	ENSMUSG00000044447:Dock5.1	0.0129912	-0.548104	1	chr14	67932937	67933937
ENSMUSG00000079491	4.49399	2.81024	3.09364e-65	8.94962e-63	H2-T10	ENSMUSG00000079491	H2-T10	ENSMUSG00000079491:H2-T10	0.0268421	-0.520104	1	chr17	36120649	36121649
ENSMUSG00000079491	4.49399	2.81024	3.09364e-65	8.94962e-63	H2-T10	ENSMUSG00000079491	H2-T10	ENSMUSG00000079491:H2-T10.1	0.0113444	-0.520104	1	chr17	36120935	36121935
ENSMUSG00000079491	4.49399	2.81024	3.09364e-65	8.94962e-63	H2-T10	ENSMUSG00000079491	H2-T10	ENSMUSG00000079491:H2-T10.2	0.0147108	-0.520104	1	chr17	36120965	36121965
ENSMUSG00000062991	1.54399	3.09495	3.91281e-15	3.16543e-13	Nrg1	ENSMUSG00000062991	Nrg1	ENSMUSG00000062991:Nrg1.10	0.152883	-0.517185	1	chr8	32008608	32009608
ENSMUSG00000062991	1.54399	3.09495	3.91281e-15	3.16543e-13	Nrg1	ENSMUSG00000062991	Nrg1	ENSMUSG00000062991:Nrg1.11	0.152701	-0.517185	1	chr8	32008621	32009621
ENSMUSG00000062991	1.54399	3.09495	3.91281e-15	3.16543e-13	Nrg1	ENSMUSG00000062991	Nrg1	ENSMUSG00000062991:Nrg1.12	0.117036	-0.517185	1	chr8	32008653	32009653
ENSMUSG00000062991	1.54399	3.09495	3.91281e-15	3.16543e-13	Nrg1	ENSMUSG00000062991	Nrg1	ENSMUSG00000062991:Nrg1.13	0.111928	-0.517185	1	chr8	32008682	32009682
ENSMUSG00000062991	1.54399	3.09495	3.91281e-15	3.16543e-13	Nrg1	ENSMUSG00000062991	Nrg1	ENSMUSG00000062991:Nrg1.14	0.149076	-0.517185	1	chr8	32008951	32009951
ENSMUSG00000062991	1.54399	3.09495	3.91281e-15	3.16543e-13	Nrg1	ENSMUSG00000062991	Nrg1	ENSMUSG00000062991:Nrg1.15	0.152897	-0.517185	1	chr8	32008971	32009971
ENSMUSG00000062991	1.54399	3.09495	3.91281e-15	3.16543e-13	Nrg1	ENSMUSG00000062991	Nrg1	ENSMUSG00000062991:Nrg1.16	0.145043	-0.517185	1	chr8	32008991	32009991
ENSMUSG00000062991	1.54399	3.09495	3.91281e-15	3.16543e-13	Nrg1	ENSMUSG00000062991	Nrg1	ENSMUSG00000062991:Nrg1.17	0.144731	-0.517185	1	chr8	32009004	32010004
ENSMUSG00000062991	1.54399	3.09495	3.91281e-15	3.16543e-13	Nrg1	ENSMUSG00000062991	Nrg1	ENSMUSG00000062991:Nrg1.18	0.141362	-0.517185	1	chr8	32009041	32010041
ENSMUSG00000062991	1.54399	3.09495	3.91281e-15	3.16543e-13	Nrg1	ENSMUSG00000062991	Nrg1	ENSMUSG00000062991:Nrg1.19	0.029265	-0.517185	1	chr8	32292413	32293413
ENSMUSG00000062991	1.54399	3.09495	3.91281e-15	3.16543e-13	Nrg1	ENSMUSG00000062991	Nrg1	ENSMUSG00000062991:Nrg1.20	0.103731	-0.517185	1	chr8	32883362	32884362
ENSMUSG00000062991	1.54399	3.09495	3.91281e-15	3.16543e-13	Nrg1	ENSMUSG00000062991	Nrg1	ENSMUSG00000062991:Nrg1.2	0.0534454	-0.517185	1	chr8	31917150	31918150
ENSMUSG00000062991	1.54399	3.09495	3.91281e-15	3.16543e-13	Nrg1	ENSMUSG00000062991	Nrg1	ENSMUSG00000062991:Nrg1.21	0.0165761	-0.517185	1	chr8	32883754	32884754
ENSMUSG00000062991	1.54399	3.09495	3.91281e-15	3.16543e-13	Nrg1	ENSMUSG00000062991	Nrg1	ENSMUSG00000062991:Nrg1.22	0.000812457	-0.517185	1	chr8	32883957	32884957
ENSMUSG00000062991	1.54399	3.09495	3.91281e-15	3.16543e-13	Nrg1	ENSMUSG00000062991	Nrg1	ENSMUSG00000062991:Nrg1.23	0.208122	-0.517185	1	chr8	32884297	32885297
ENSMUSG00000062991	1.54399	3.09495	3.91281e-15	3.16543e-13	Nrg1	ENSMUSG00000062991	Nrg1	ENSMUSG00000062991:Nrg1.3	0.0536658	-0.517185	1	chr8	31917166	31918166
ENSMUSG00000062991	1.54399	3.09495	3.91281e-15	3.16543e-13	Nrg1	ENSMUSG00000062991	Nrg1	ENSMUSG00000062991:Nrg1.4	0.449304	-0.517185	1	chr8	31917857	31918857
ENSMUSG00000062991	1.54399	3.09495	3.91281e-15	3.16543e-13	Nrg1	ENSMUSG00000062991	Nrg1	ENSMUSG00000062991:Nrg1.5	0.458336	-0.517185	1	chr8	31917895	31918895
ENSMUSG00000062991	1.54399	3.09495	3.91281e-15	3.16543e-13	Nrg1	ENSMUSG00000062991	Nrg1	ENSMUSG00000062991:Nrg1.6	0.462872	-0.517185	1	chr8	31918068	31919068
ENSMUSG00000031438	0.888787	3.70741	1.33155e-08	5.6302e-07	Rnf128	ENSMUSG00000031438	Rnf128	ENSMUSG00000031438:Rnf128.1	0.334564	-0.515896	1	chrX	139610098	139611098
ENSMUSG00000031438	0.888787	3.70741	1.33155e-08	5.6302e-07	Rnf128	ENSMUSG00000031438	Rnf128	ENSMUSG00000031438:Rnf128.2	0.266649	-0.515896	1	chrX	139610845	139611845
ENSMUSG00000034981	1.08837	3.4725	1.1363e-09	5.70121e-08	Parm1	ENSMUSG00000034981	Parm1	ENSMUSG00000034981:Parm1	0.15503	-0.513003	1	chr5	91517093	91518093
ENSMUSG00000032265	1.01773	3.30351	6.80147e-09	3.04187e-07	Tent5a	ENSMUSG00000032265	Tent5a	ENSMUSG00000032265:Tent5a	0.131024	-0.472399	1	chr9	85326624	85327624
ENSMUSG00000032265	1.01773	3.30351	6.80147e-09	3.04187e-07	Tent5a	ENSMUSG00000032265	Tent5a	ENSMUSG00000032265:Tent5a.1	0.230793	-0.472399	1	chr9	85326848	85327848
ENSMUSG00000020689	5.14861	5.42431	8.97796e-305	6.3133e-302	Itgb3	ENSMUSG00000020689	Itgb3	ENSMUSG00000020689:Itgb3	0.446173	-0.450251	1	chr11	104607478	104608478
ENSMUSG00000022425	0.749985	8.73761	8.72592e-20	9.87238e-18	Enpp2	ENSMUSG00000022425	Enpp2	ENSMUSG00000022425:Enpp2.2	0.295561	-0.448568	1	chr15	54919461	54920461
ENSMUSG00000022425	0.749985	8.73761	8.72592e-20	9.87238e-18	Enpp2	ENSMUSG00000022425	Enpp2	ENSMUSG00000022425:Enpp2.3	0.29166	-0.448568	1	chr15	54919502	54920502
ENSMUSG00000022425	0.749985	8.73761	8.72592e-20	9.87238e-18	Enpp2	ENSMUSG00000022425	Enpp2	ENSMUSG00000022425:Enpp2.4	0.290741	-0.448568	1	chr15	54919518	54920518
ENSMUSG00000022425	0.749985	8.73761	8.72592e-20	9.87238e-18	Enpp2	ENSMUSG00000022425	Enpp2	ENSMUSG00000022425:Enpp2.5	0.281207	-0.448568	1	chr15	54919625	54920625
ENSMUSG00000022425	0.749985	8.73761	8.72592e-20	9.87238e-18	Enpp2	ENSMUSG00000022425	Enpp2	ENSMUSG00000022425:Enpp2.7	0.081763	-0.448568	1	chr15	54952392	54953392
ENSMUSG00000059325	0.809326	3.93797	4.23535e-08	1.67901e-06	Hopx	ENSMUSG00000059325	Hopx	ENSMUSG00000059325:Hopx	0.472889	-0.445922	1	chr5	77094753	77095753
ENSMUSG00000059325	0.809326	3.93797	4.23535e-08	1.67901e-06	Hopx	ENSMUSG00000059325	Hopx	ENSMUSG00000059325:Hopx.1	0.475041	-0.445922	1	chr5	77094777	77095777
ENSMUSG00000059325	0.809326	3.93797	4.23535e-08	1.67901e-06	Hopx	ENSMUSG00000059325	Hopx	ENSMUSG00000059325:Hopx.2	0.010496	-0.445922	1	chr5	77114621	77115621
ENSMUSG00000073411	5.59848	9.16877	0	0	H2-D1	ENSMUSG00000073411	H2-D1	ENSMUSG00000073411:H2-D1	0.332486	-0.43857	1	chr17	35262208	35263208
ENSMUSG00000073411	5.59848	9.16877	0	0	H2-D1	ENSMUSG00000073411	H2-D1	ENSMUSG00000073411:H2-D1.1	0.26416	-0.43857	1	chr17	35262574	35263574
ENSMUSG00000009394	0.892692	6.64139	1.54572e-24	2.1739e-22	Syn2	ENSMUSG00000009394	Syn2	ENSMUSG00000009394:Syn2	0.0756817	-0.434912	1	chr6	115134404	115135404
ENSMUSG00000029826	3.03085	5.99616	4.70241e-177	2.41503e-174	Zc3hav1	ENSMUSG00000029826	Zc3hav1	ENSMUSG00000029826:Zc3hav1	0.420242	-0.42713	1	chr6	38353773	38354773
ENSMUSG00000070469	0.585013	4.37353	2.31599e-06	6.87974e-05	Adamtsl3	ENSMUSG00000070469	Adamtsl3	ENSMUSG00000070469:Adamtsl3	0.172081	-0.406853	1	chr7	82335191	82336191
ENSMUSG00000024338	9.14327	7.11375	0	0	Psmb8	ENSMUSG00000024338	Psmb8	ENSMUSG00000024338:Psmb8	0.189565	-0.391413	1	chr17	34197199	34198199
ENSMUSG00000024338	9.14327	7.11375	0	0	Psmb8	ENSMUSG00000024338	Psmb8	ENSMUSG00000024338:Psmb8.1	0.277543	-0.391413	1	chr17	34197268	34198268
ENSMUSG00000024338	9.14327	7.11375	0	0	Psmb8	ENSMUSG00000024338	Psmb8	ENSMUSG00000024338:Psmb8.4	0.174032	-0.391413	1	chr17	34198832	34199832
ENSMUSG00000061232	5.84347	8.97472	0	0	H2-K1	ENSMUSG00000061232	H2-K1	ENSMUSG00000061232:H2-K1.10	0.44959	-0.390445	1	chr17	33999785	34000785
ENSMUSG00000061232	5.84347	8.97472	0	0	H2-K1	ENSMUSG00000061232	H2-K1	ENSMUSG00000061232:H2-K1.11	0.452667	-0.390445	1	chr17	33999805	34000805
ENSMUSG00000061232	5.84347	8.97472	0	0	H2-K1	ENSMUSG00000061232	H2-K1	ENSMUSG00000061232:H2-K1.12	0.457173	-0.390445	1	chr17	33999847	34000847
ENSMUSG00000061232	5.84347	8.97472	0	0	H2-K1	ENSMUSG00000061232	H2-K1	ENSMUSG00000061232:H2-K1.5	0.110011	-0.390445	1	chr17	33998827	33999827
ENSMUSG00000061232	5.84347	8.97472	0	0	H2-K1	ENSMUSG00000061232	H2-K1	ENSMUSG00000061232:H2-K1.6	0.0155838	-0.390445	1	chr17	33998974	33999974
ENSMUSG00000061232	5.84347	8.97472	0	0	H2-K1	ENSMUSG00000061232	H2-K1	ENSMUSG00000061232:H2-K1.7	0.153078	-0.390445	1	chr17	33999184	34000184
ENSMUSG00000061232	5.84347	8.97472	0	0	H2-K1	ENSMUSG00000061232	H2-K1	ENSMUSG00000061232:H2-K1.8	0.454785	-0.390445	1	chr17	33999708	34000708
ENSMUSG00000061232	5.84347	8.97472	0	0	H2-K1	ENSMUSG00000061232	H2-K1	ENSMUSG00000061232:H2-K1.9	0.451735	-0.390445	1	chr17	33999754	34000754
ENSMUSG00000038301	2.28476	6.20298	2.58865e-129	1.03791e-126	Snx10	ENSMUSG00000038301	Snx10	ENSMUSG00000038301:Snx10	0.097793	-0.371507	1	chr6	51523379	51524379
ENSMUSG00000038301	2.28476	6.20298	2.58865e-129	1.03791e-126	Snx10	ENSMUSG00000038301	Snx10	ENSMUSG00000038301:Snx10.1	0.0920671	-0.371507	1	chr6	51523460	51524460
ENSMUSG00000038301	2.28476	6.20298	2.58865e-129	1.03791e-126	Snx10	ENSMUSG00000038301	Snx10	ENSMUSG00000038301:Snx10.2	0.124553	-0.371507	1	chr6	51523750	51524750
ENSMUSG00000031557	2.60435	5.73386	6.23324e-147	2.76611e-144	Plekha2	ENSMUSG00000031557	Plekha2	ENSMUSG00000031557:Plekha2.1	0.40649	-0.366872	1	chr8	25101271	25102271
ENSMUSG00000031557	2.60435	5.73386	6.23324e-147	2.76611e-144	Plekha2	ENSMUSG00000031557	Plekha2	ENSMUSG00000031557:Plekha2.2	0.444512	-0.366872	1	chr8	25101485	25102485
ENSMUSG00000037997	2.53058	6.56927	1.41367e-166	7.10067e-164	Parp11	ENSMUSG00000037997	Parp11	ENSMUSG00000037997:Parp11.1	0.340474	-0.342403	1	chr6	127448741	127449741
ENSMUSG00000037997	2.53058	6.56927	1.41367e-166	7.10067e-164	Parp11	ENSMUSG00000037997	Parp11	ENSMUSG00000037997:Parp11.2	0.328487	-0.342403	1	chr6	127453149	127454149

## Sheet: TSS_windows_all_nochange
	"logFC" RNA IFN-g 24h (+0h) vs. Ctrl	"logCPM" RNA IFN-g 24h (+0h) vs. Ctrl	"PValue" RNA IFN-g 24h (+0h) vs. Ctrl	"FDR" RNA IFN-g 24h (+0h) vs. Ctrl	GeneSymbol	ENS_102		TSS_window	ATAC_logFC	TSSwindow_chr	TSS_window_start	TSS_window_end
ENSMUSG00000042901	1.22431	5.83506	8.09143e-40	1.6735e-37	Aida	ENSMUSG00000042901	Aida	ENSMUSG00000042901:Aida.1	0.00177285	chr1	183296527	183297527
ENSMUSG00000042901	1.22431	5.83506	8.09143e-40	1.6735e-37	Aida	ENSMUSG00000042901	Aida	ENSMUSG00000042901:Aida.2	0.0080489	chr1	183296805	183297805
ENSMUSG00000102909	3.55345	-2.93647	0.00278399	0.0396543	Gm2453	ENSMUSG00000102909	Gm2453	ENSMUSG00000102909:Gm2453	0.00962049	chr1	167284546	167285546
ENSMUSG00000026072	0.730385	0.729342	0.0447973	0.361191	Il1r1	ENSMUSG00000026072	Il1r1	ENSMUSG00000026072:Il1r1.1	0.01206	chr1	40266064	40267064
ENSMUSG00000070643	1.29652	3.96322	1.90791e-19	2.12182e-17	Sox13	ENSMUSG00000070643	Sox13	ENSMUSG00000070643:Sox13.4	0.0128527	chr1	133423877	133424877
ENSMUSG00000026088	1.52022	3.57734	2.09892e-20	2.42879e-18	Mitd1	ENSMUSG00000026088	Mitd1	ENSMUSG00000026088:Mitd1.2	0.0141373	chr1	37889776	37890776
ENSMUSG00000026110	0.513546	5.83744	1.98151e-08	8.12293e-07	Mgat4a	ENSMUSG00000026110	Mgat4a	ENSMUSG00000026110:Mgat4a.6	0.0148975	chr1	37540516	37541516
ENSMUSG00000042901	1.22431	5.83506	8.09143e-40	1.6735e-37	Aida	ENSMUSG00000042901	Aida	ENSMUSG00000042901:Aida.3	0.0158115	chr1	183296883	183297883
ENSMUSG00000026708	0.61784	3.79304	6.11567e-05	0.00137499	Cenpl	ENSMUSG00000026708	Cenpl	ENSMUSG00000026708:Cenpl.2	0.0169727	chr1	161070461	161071461
ENSMUSG00000026031	1.03427	5.65912	3.72957e-25	5.36072e-23	Cflar	ENSMUSG00000026031	Cflar	ENSMUSG00000026031:Cflar.1	0.0170751	chr1	58712783	58713783
ENSMUSG00000102909	3.55345	-2.93647	0.00278399	0.0396543	Gm2453	ENSMUSG00000102909	Gm2453	ENSMUSG00000102909:Gm2453.1	0.0195766	chr1	167284962	167285962
ENSMUSG00000026126	2.4547	-0.193624	3.47976e-07	1.19409e-05	Ptpn18	ENSMUSG00000026126	Ptpn18	ENSMUSG00000026126:Ptpn18	0.0219129	chr1	34459255	34460255
ENSMUSG00000042901	1.22431	5.83506	8.09143e-40	1.6735e-37	Aida	ENSMUSG00000042901	Aida	ENSMUSG00000042901:Aida	0.0234397	chr1	183296068	183297068
ENSMUSG00000037447	2.05426	5.12612	2.59786e-84	8.36217e-82	Arid5a	ENSMUSG00000037447	Arid5a	ENSMUSG00000037447:Arid5a	0.0235828	chr1	36307234	36308234
ENSMUSG00000026385	0.741677	9.29863	3.40301e-18	3.42609e-16	Dbi	ENSMUSG00000026385	Dbi	ENSMUSG00000026385:Dbi.4	0.0236048	chr1	120120547	120121547
ENSMUSG00000026385	0.741677	9.29863	3.40301e-18	3.42609e-16	Dbi	ENSMUSG00000026385	Dbi	ENSMUSG00000026385:Dbi.3	0.0253066	chr1	120120516	120121516
ENSMUSG00000055013	0.773448	9.07495	1.31935e-15	1.11469e-13	Agap1	ENSMUSG00000055013	Agap1	ENSMUSG00000055013:Agap1.2	0.0255014	chr1	89454734	89455734
ENSMUSG00000026708	0.61784	3.79304	6.11567e-05	0.00137499	Cenpl	ENSMUSG00000026708	Cenpl	ENSMUSG00000026708:Cenpl	0.0257457	chr1	161070218	161071218
ENSMUSG00000041859	0.643485	6.16492	1.04943e-12	7.17e-11	Mcm3	ENSMUSG00000041859	Mcm3	ENSMUSG00000041859:Mcm3.3	0.0263382	chr1	20819760	20820760
ENSMUSG00000055013	0.773448	9.07495	1.31935e-15	1.11469e-13	Agap1	ENSMUSG00000055013	Agap1	ENSMUSG00000055013:Agap1	0.027347	chr1	89454284	89455284
ENSMUSG00000041859	0.643485	6.16492	1.04943e-12	7.17e-11	Mcm3	ENSMUSG00000041859	Mcm3	ENSMUSG00000041859:Mcm3.4	0.0278637	chr1	20819812	20820812
ENSMUSG00000043629	1.55176	2.9921	2.2888e-15	1.8918e-13	1700019D03Rik	ENSMUSG00000043629	1700019D03Rik	ENSMUSG00000043629:1700019D03Rik.3	0.0279057	chr1	52971546	52972546
ENSMUSG00000026088	1.52022	3.57734	2.09892e-20	2.42879e-18	Mitd1	ENSMUSG00000026088	Mitd1	ENSMUSG00000026088:Mitd1.3	0.0280176	chr1	37889909	37890909
ENSMUSG00000026708	0.61784	3.79304	6.11567e-05	0.00137499	Cenpl	ENSMUSG00000026708	Cenpl	ENSMUSG00000026708:Cenpl.1	0.0283031	chr1	161070370	161071370
ENSMUSG00000026385	0.741677	9.29863	3.40301e-18	3.42609e-16	Dbi	ENSMUSG00000026385	Dbi	ENSMUSG00000026385:Dbi.5	0.0289198	chr1	120120578	120121578
ENSMUSG00000055013	0.773448	9.07495	1.31935e-15	1.11469e-13	Agap1	ENSMUSG00000055013	Agap1	ENSMUSG00000055013:Agap1.1	0.0297291	chr1	89454352	89455352
ENSMUSG00000026072	0.730385	0.729342	0.0447973	0.361191	Il1r1	ENSMUSG00000026072	Il1r1	ENSMUSG00000026072:Il1r1.2	0.0303415	chr1	40266135	40267135
ENSMUSG00000026385	0.741677	9.29863	3.40301e-18	3.42609e-16	Dbi	ENSMUSG00000026385	Dbi	ENSMUSG00000026385:Dbi.2	0.0308491	chr1	120120437	120121437
ENSMUSG00000101942	2.63546	-3.27965	0.0416969	0.341683	Gm19582	ENSMUSG00000101942	Gm19582	ENSMUSG00000101942:Gm19582	0.031657	chr1	87853799	87854799
ENSMUSG00000042901	1.22431	5.83506	8.09143e-40	1.6735e-37	Aida	ENSMUSG00000042901	Aida	ENSMUSG00000042901:Aida.4	0.0325401	chr1	183297048	183298048
ENSMUSG00000066800	1.82362	1.49418	8.59316e-09	3.78033e-07	Rnasel	ENSMUSG00000066800	Rnasel	ENSMUSG00000066800:Rnasel.1	0.0331903	chr1	153748982	153749982
ENSMUSG00000010609	0.958762	3.69434	8.0857e-10	4.1526e-08	Psen2	ENSMUSG00000010609	Psen2	ENSMUSG00000010609:Psen2.9	0.0334769	chr1	180255800	180256800
ENSMUSG00000010609	0.958762	3.69434	8.0857e-10	4.1526e-08	Psen2	ENSMUSG00000010609	Psen2	ENSMUSG00000010609:Psen2.8	0.0361695	chr1	180255744	180256744
ENSMUSG00000066800	1.82362	1.49418	8.59316e-09	3.78033e-07	Rnasel	ENSMUSG00000066800	Rnasel	ENSMUSG00000066800:Rnasel	0.0361871	chr1	153748904	153749904
ENSMUSG00000037509	0.76484	6.70975	7.97499e-20	9.04518e-18	Arhgef4	ENSMUSG00000037509	Arhgef4	ENSMUSG00000037509:Arhgef4	0.0365687	chr1	34677666	34678666
ENSMUSG00000050122	4.39665	-2.2227	2.4222e-05	0.00059079	Vwa3b	ENSMUSG00000050122	Vwa3b	ENSMUSG00000050122:Vwa3b.1	0.0367498	chr1	37028822	37029822
ENSMUSG00000026031	1.03427	5.65912	3.72957e-25	5.36072e-23	Cflar	ENSMUSG00000026031	Cflar	ENSMUSG00000026031:Cflar.2	0.0400945	chr1	58713364	58714364
ENSMUSG00000102923	2.79037	-3.18604	0.0275151	0.253611	Gm31728	ENSMUSG00000102923	Gm31728	ENSMUSG00000102923:Gm31728	0.0437881	chr1	180255907	180256907
ENSMUSG00000044854	0.970123	0.0963703	0.0245427	0.232786	1700056E22Rik	ENSMUSG00000044854	1700056E22Rik	ENSMUSG00000044854:1700056E22Rik	0.0517034	chr1	184033498	184034498
ENSMUSG00000026429	0.716207	3.18306	9.00694e-05	0.00195021	Ube2t	ENSMUSG00000026429	Ube2t	ENSMUSG00000026429:Ube2t	0.0566755	chr1	134962069	134963069
ENSMUSG00000039377	1.18827	0.818625	0.0196655	0.196967	Hlx	ENSMUSG00000039377	Hlx	ENSMUSG00000039377:Hlx	0.0615511	chr1	184731098	184732098
ENSMUSG00000004110	1.82432	4.47669	4.50455e-44	1.00436e-41	Cacna1e	ENSMUSG00000004110	Cacna1e	ENSMUSG00000004110:Cacna1e.6	0.0620518	chr1	154883524	154884524
ENSMUSG00000026683	0.518451	5.60959	5.70665e-08	2.2294e-06	Nuf2	ENSMUSG00000026683	Nuf2	ENSMUSG00000026683:Nuf2.1	0.0651984	chr1	169530920	169531920
ENSMUSG00000060424	0.712398	5.51345	1.09501e-13	8.13831e-12	Pantr1	ENSMUSG00000060424	Pantr1	ENSMUSG00000060424:Pantr1.7	0.0653124	chr1	42694308	42695308
ENSMUSG00000060424	0.712398	5.51345	1.09501e-13	8.13831e-12	Pantr1	ENSMUSG00000060424	Pantr1	ENSMUSG00000060424:Pantr1.9	0.0654022	chr1	42694342	42695342
ENSMUSG00000010175	0.628558	5.6232	1.22248e-10	7.01975e-09	Prox1	ENSMUSG00000010175	Prox1	ENSMUSG00000010175:Prox1.1	0.0698255	chr1	190170180	190171180
ENSMUSG00000060424	0.712398	5.51345	1.09501e-13	8.13831e-12	Pantr1	ENSMUSG00000060424	Pantr1	ENSMUSG00000060424:Pantr1.8	0.0698572	chr1	42694325	42695325
ENSMUSG00000026683	0.518451	5.60959	5.70665e-08	2.2294e-06	Nuf2	ENSMUSG00000026683	Nuf2	ENSMUSG00000026683:Nuf2.2	0.0704975	chr1	169530964	169531964
ENSMUSG00000026519	0.540011	2.63578	0.0120463	0.133273	Tmem63a	ENSMUSG00000026519	Tmem63a	ENSMUSG00000026519:Tmem63a	0.0708226	chr1	180941822	180942822
ENSMUSG00000010175	0.628558	5.6232	1.22248e-10	7.01975e-09	Prox1	ENSMUSG00000010175	Prox1	ENSMUSG00000010175:Prox1.2	0.071011	chr1	190170214	190171214
ENSMUSG00000026158	0.724311	4.4307	1.30794e-08	5.55093e-07	Ogfrl1	ENSMUSG00000026158	Ogfrl1	ENSMUSG00000026158:Ogfrl1.1	0.0769864	chr1	23382675	23383675
ENSMUSG00000079465	1.84374	1.65753	5.70347e-09	2.58369e-07	Col4a3	ENSMUSG00000079465	Col4a3	ENSMUSG00000079465:Col4a3	0.0787421	chr1	82586426	82587426
ENSMUSG00000026519	0.540011	2.63578	0.0120463	0.133273	Tmem63a	ENSMUSG00000026519	Tmem63a	ENSMUSG00000026519:Tmem63a.1	0.0796407	chr1	180941936	180942936
ENSMUSG00000044854	0.970123	0.0963703	0.0245427	0.232786	1700056E22Rik	ENSMUSG00000044854	1700056E22Rik	ENSMUSG00000044854:1700056E22Rik.1	0.0900968	chr1	184033801	184034801
ENSMUSG00000037509	0.76484	6.70975	7.97499e-20	9.04518e-18	Arhgef4	ENSMUSG00000037509	Arhgef4	ENSMUSG00000037509:Arhgef4.2	0.0923931	chr1	34750059	34751059
ENSMUSG00000026307	0.774672	4.43129	2.14353e-10	1.18186e-08	Scly	ENSMUSG00000026307	Scly	ENSMUSG00000026307:Scly	0.0931275	chr1	91297860	91298860
ENSMUSG00000037474	0.728963	5.23815	7.18009e-13	4.98765e-11	Dtl	ENSMUSG00000037474	Dtl	ENSMUSG00000037474:Dtl	0.0936902	chr1	191575016	191576016
ENSMUSG00000039384	1.01405	4.11703	3.30168e-14	2.50271e-12	Dusp10	ENSMUSG00000039384	Dusp10	ENSMUSG00000039384:Dusp10.1	0.0953777	chr1	184033859	184034859
ENSMUSG00000026519	0.540011	2.63578	0.0120463	0.133273	Tmem63a	ENSMUSG00000026519	Tmem63a	ENSMUSG00000026519:Tmem63a.2	0.0964455	chr1	180942052	180943052
ENSMUSG00000025925	0.641182	3.67246	3.96072e-05	0.000926019	Terf1	ENSMUSG00000025925	Terf1	ENSMUSG00000025925:Terf1	0.103076	chr1	15805133	15806133
ENSMUSG00000037474	0.728963	5.23815	7.18009e-13	4.98765e-11	Dtl	ENSMUSG00000037474	Dtl	ENSMUSG00000037474:Dtl.1	0.103208	chr1	191575044	191576044
ENSMUSG00000026385	0.741677	9.29863	3.40301e-18	3.42609e-16	Dbi	ENSMUSG00000026385	Dbi	ENSMUSG00000026385:Dbi.1	0.104072	chr1	120119670	120120670
ENSMUSG00000044337	0.851094	3.81963	9.42138e-09	4.12088e-07	Ackr3	ENSMUSG00000044337	Ackr3	ENSMUSG00000044337:Ackr3	0.104284	chr1	90203471	90204471
ENSMUSG00000026640	0.714106	6.7602	8.42303e-18	8.33333e-16	Plxna2	ENSMUSG00000026640	Plxna2	ENSMUSG00000026640:Plxna2.1	0.104872	chr1	194619303	194620303
ENSMUSG00000026342	0.865398	4.99053	2.82976e-17	2.69464e-15	Slc35f5	ENSMUSG00000026342	Slc35f5	ENSMUSG00000026342:Slc35f5	0.106996	chr1	125560073	125561073
ENSMUSG00000039748	0.687745	4.20053	1.98374e-07	7.11049e-06	Exo1	ENSMUSG00000039748	Exo1	ENSMUSG00000039748:Exo1	0.109447	chr1	175880059	175881059
ENSMUSG00000026385	0.741677	9.29863	3.40301e-18	3.42609e-16	Dbi	ENSMUSG00000026385	Dbi	ENSMUSG00000026385:Dbi	0.110562	chr1	120119638	120120638
ENSMUSG00000097564	1.2848	-1.66134	0.0457609	0.36689	C430014B12Rik	ENSMUSG00000097564	C430014B12Rik	ENSMUSG00000097564:C430014B12Rik.2	0.11444	chr1	82724669	82725669
ENSMUSG00000097564	1.2848	-1.66134	0.0457609	0.36689	C430014B12Rik	ENSMUSG00000097564	C430014B12Rik	ENSMUSG00000097564:C430014B12Rik.1	0.116066	chr1	82724647	82725647
ENSMUSG00000039748	0.687745	4.20053	1.98374e-07	7.11049e-06	Exo1	ENSMUSG00000039748	Exo1	ENSMUSG00000039748:Exo1.2	0.116434	chr1	175880661	175881661
ENSMUSG00000097564	1.2848	-1.66134	0.0457609	0.36689	C430014B12Rik	ENSMUSG00000097564	C430014B12Rik	ENSMUSG00000097564:C430014B12Rik	0.118058	chr1	82724617	82725617
ENSMUSG00000002459	1.02531	4.96786	1.58781e-13	1.16494e-11	Rgs20	ENSMUSG00000002459	Rgs20	ENSMUSG00000002459:Rgs20.3	0.122371	chr1	5069779	5070779
ENSMUSG00000097892	1.37124	-1.93368	0.0447273	0.360881	Gm26801	ENSMUSG00000097892	Gm26801	ENSMUSG00000097892:Gm26801.1	0.123826	chr1	177442770	177443770
ENSMUSG00000039748	0.687745	4.20053	1.98374e-07	7.11049e-06	Exo1	ENSMUSG00000039748	Exo1	ENSMUSG00000039748:Exo1.1	0.127106	chr1	175880281	175881281
ENSMUSG00000033557	0.727035	7.07821	1.11113e-18	1.15954e-16	Fam20b	ENSMUSG00000033557	Fam20b	ENSMUSG00000033557:Fam20b.3	0.127872	chr1	156718572	156719572
ENSMUSG00000033557	0.727035	7.07821	1.11113e-18	1.15954e-16	Fam20b	ENSMUSG00000033557	Fam20b	ENSMUSG00000033557:Fam20b.4	0.131793	chr1	156718586	156719586
ENSMUSG00000026342	0.865398	4.99053	2.82976e-17	2.69464e-15	Slc35f5	ENSMUSG00000026342	Slc35f5	ENSMUSG00000026342:Slc35f5.1	0.134347	chr1	125560494	125561494
ENSMUSG00000104217	2.47536	-2.27767	0.00547701	0.0701634	Gm37988	ENSMUSG00000104217	Gm37988	ENSMUSG00000104217:Gm37988	0.13445	chr1	4807379	4808379
ENSMUSG00000009772	1.79101	1.57974	3.66726e-08	1.47173e-06	Nuak2	ENSMUSG00000009772	Nuak2	ENSMUSG00000009772:Nuak2	0.137661	chr1	132315623	132316623
ENSMUSG00000097435	4.33507	-3.48568	0.0122717	0.135082	Gm26783	ENSMUSG00000097435	Gm26783	ENSMUSG00000097435:Gm26783	0.152733	chr1	134646020	134647020
ENSMUSG00000026104	5.47443	9.53038	2.10473e-87	7.0221e-85	Stat1	ENSMUSG00000026104	Stat1	ENSMUSG00000026104:Stat1.1	0.156136	chr1	52149582	52150582
ENSMUSG00000037509	0.76484	6.70975	7.97499e-20	9.04518e-18	Arhgef4	ENSMUSG00000037509	Arhgef4	ENSMUSG00000037509:Arhgef4.3	0.159561	chr1	34801227	34802227
ENSMUSG00000037568	0.616697	3.69429	9.10311e-05	0.0019701	Vash2	ENSMUSG00000037568	Vash2	ENSMUSG00000037568:Vash2	0.159626	chr1	190978502	190979502
ENSMUSG00000066877	0.644071	4.60604	1.207e-08	5.17788e-07	Nck2	ENSMUSG00000066877	Nck2	ENSMUSG00000066877:Nck2.1	0.165803	chr1	43445229	43446229
ENSMUSG00000010175	0.628558	5.6232	1.22248e-10	7.01975e-09	Prox1	ENSMUSG00000010175	Prox1	ENSMUSG00000010175:Prox1	0.169268	chr1	190168899	190169899
ENSMUSG00000004110	1.82432	4.47669	4.50455e-44	1.00436e-41	Cacna1e	ENSMUSG00000004110	Cacna1e	ENSMUSG00000004110:Cacna1e.7	0.173237	chr1	154884001	154885001
ENSMUSG00000026452	4.74889	1.5994	4.65285e-31	8.11727e-29	Syt2	ENSMUSG00000026452	Syt2	ENSMUSG00000026452:Syt2	0.176404	chr1	134646157	134647157
ENSMUSG00000040710	0.942798	2.94942	1.52526e-06	4.70071e-05	St8sia4	ENSMUSG00000040710	St8sia4	ENSMUSG00000040710:St8sia4	0.176565	chr1	95667035	95668035
ENSMUSG00000040710	0.942798	2.94942	1.52526e-06	4.70071e-05	St8sia4	ENSMUSG00000040710	St8sia4	ENSMUSG00000040710:St8sia4.1	0.184095	chr1	95667068	95668068
ENSMUSG00000037568	0.616697	3.69429	9.10311e-05	0.0019701	Vash2	ENSMUSG00000037568	Vash2	ENSMUSG00000037568:Vash2.2	0.186043	chr1	190978796	190979796
ENSMUSG00000040918	0.547472	4.1056	5.08711e-05	0.00116611	Slc19a2	ENSMUSG00000040918	Slc19a2	ENSMUSG00000040918:Slc19a2	0.189757	chr1	164248528	164249528
ENSMUSG00000037568	0.616697	3.69429	9.10311e-05	0.0019701	Vash2	ENSMUSG00000037568	Vash2	ENSMUSG00000037568:Vash2.1	0.190055	chr1	190978714	190979714
ENSMUSG00000042671	1.24592	0.555446	0.00175435	0.0269629	Rgs8	ENSMUSG00000042671	Rgs8	ENSMUSG00000042671:Rgs8.4	0.190348	chr1	153665071	153666071
ENSMUSG00000040918	0.547472	4.1056	5.08711e-05	0.00116611	Slc19a2	ENSMUSG00000040918	Slc19a2	ENSMUSG00000040918:Slc19a2.1	0.196747	chr1	164248731	164249731
ENSMUSG00000033849	0.678748	3.42631	6.68523e-05	0.00149276	B3galt2	ENSMUSG00000033849	B3galt2	ENSMUSG00000033849:B3galt2	0.197502	chr1	143640142	143641142
ENSMUSG00000098206	0.565467	3.22961	0.0379838	0.321631	Mir181a-1hg	ENSMUSG00000098206	A430106G13Rik	ENSMUSG00000098206:Mir181a-1hg	0.200873	chr1	137966009	137967009
ENSMUSG00000070532	0.943662	3.80284	9.23325e-10	4.72602e-08	Ccdc190	ENSMUSG00000070532	Ccdc190	ENSMUSG00000070532:Ccdc190	0.206474	chr1	169928126	169929126
ENSMUSG00000042671	1.24592	0.555446	0.00175435	0.0269629	Rgs8	ENSMUSG00000042671	Rgs8	ENSMUSG00000042671:Rgs8.3	0.210798	chr1	153664771	153665771
ENSMUSG00000033952	0.564201	7.24938	1.01065e-09	5.12136e-08	Aspm	ENSMUSG00000033952	Aspm	ENSMUSG00000033952:Aspm	0.212957	chr1	139454273	139455273
ENSMUSG00000004110	1.82432	4.47669	4.50455e-44	1.00436e-41	Cacna1e	ENSMUSG00000004110	Cacna1e	ENSMUSG00000004110:Cacna1e.3	0.221984	chr1	154725856	154726856
ENSMUSG00000002459	1.02531	4.96786	1.58781e-13	1.16494e-11	Rgs20	ENSMUSG00000002459	Rgs20	ENSMUSG00000002459:Rgs20.1	0.227827	chr1	5018879	5019879
ENSMUSG00000026622	0.538359	5.08293	2.44505e-07	8.59018e-06	Nek2	ENSMUSG00000026622	Nek2	ENSMUSG00000026622:Nek2	0.24128	chr1	191820922	191821922
ENSMUSG00000002459	1.02531	4.96786	1.58781e-13	1.16494e-11	Rgs20	ENSMUSG00000002459	Rgs20	ENSMUSG00000002459:Rgs20	0.243022	chr1	5018235	5019235
ENSMUSG00000097063	0.710172	1.6797	0.0193035	0.194344	Pantr2	ENSMUSG00000097063	Pantr2	ENSMUSG00000097063:Pantr2.1	0.246169	chr1	42712954	42713954
ENSMUSG00000050534	5.35617	0.548788	9.59696e-22	1.19201e-19	Htr5b	ENSMUSG00000050534	Htr5b	ENSMUSG00000050534:Htr5b	0.248383	chr1	121527965	121528965
ENSMUSG00000026312	0.894069	0.735783	0.0171788	0.176809	Cdh7	ENSMUSG00000026312	Cdh7	ENSMUSG00000026312:Cdh7.3	0.254997	chr1	109982733	109983733
ENSMUSG00000026452	4.74889	1.5994	4.65285e-31	8.11727e-29	Syt2	ENSMUSG00000026452	Syt2	ENSMUSG00000026452:Syt2.1	0.262608	chr1	134708778	134709778
ENSMUSG00000103004	1.0333	-0.379895	0.0259988	0.243765	2900002M20Rik	ENSMUSG00000103004	2900002M20Rik	ENSMUSG00000103004:2900002M20Rik	0.263557	chr1	25824219	25825219
ENSMUSG00000026102	1.02492	5.14179	1.17569e-21	1.45239e-19	Inpp1	ENSMUSG00000026102	Inpp1	ENSMUSG00000026102:Inpp1.3	0.265639	chr1	52816951	52817951
ENSMUSG00000043629	1.55176	2.9921	2.2888e-15	1.8918e-13	1700019D03Rik	ENSMUSG00000043629	1700019D03Rik	ENSMUSG00000043629:1700019D03Rik	0.266163	chr1	52952344	52953344
ENSMUSG00000041498	0.709521	5.34104	1.64574e-06	5.01155e-05	Kif14	ENSMUSG00000041498	Kif14	ENSMUSG00000041498:Kif14	0.271928	chr1	136465821	136466821
ENSMUSG00000026031	1.03427	5.65912	3.72957e-25	5.36072e-23	Cflar	ENSMUSG00000026031	Cflar	ENSMUSG00000026031:Cflar	0.272582	chr1	58711012	58712012
ENSMUSG00000002459	1.02531	4.96786	1.58781e-13	1.16494e-11	Rgs20	ENSMUSG00000002459	Rgs20	ENSMUSG00000002459:Rgs20.2	0.274502	chr1	5019039	5020039
ENSMUSG00000026102	1.02492	5.14179	1.17569e-21	1.45239e-19	Inpp1	ENSMUSG00000026102	Inpp1	ENSMUSG00000026102:Inpp1.4	0.277195	chr1	52817068	52818068
ENSMUSG00000026102	1.02492	5.14179	1.17569e-21	1.45239e-19	Inpp1	ENSMUSG00000026102	Inpp1	ENSMUSG00000026102:Inpp1.5	0.277705	chr1	52817188	52818188
ENSMUSG00000042671	1.24592	0.555446	0.00175435	0.0269629	Rgs8	ENSMUSG00000042671	Rgs8	ENSMUSG00000042671:Rgs8	0.277961	chr1	153652503	153653503
ENSMUSG00000026312	0.894069	0.735783	0.0171788	0.176809	Cdh7	ENSMUSG00000026312	Cdh7	ENSMUSG00000026312:Cdh7	0.280628	chr1	109981909	109982909
ENSMUSG00000026622	0.538359	5.08293	2.44505e-07	8.59018e-06	Nek2	ENSMUSG00000026622	Nek2	ENSMUSG00000026622:Nek2.1	0.289218	chr1	191820988	191821988
ENSMUSG00000026519	0.540011	2.63578	0.0120463	0.133273	Tmem63a	ENSMUSG00000026519	Tmem63a	ENSMUSG00000026519:Tmem63a.4	0.293532	chr1	180945384	180946384
ENSMUSG00000043629	1.55176	2.9921	2.2888e-15	1.8918e-13	1700019D03Rik	ENSMUSG00000043629	1700019D03Rik	ENSMUSG00000043629:1700019D03Rik.1	0.294095	chr1	52952850	52953850
ENSMUSG00000026519	0.540011	2.63578	0.0120463	0.133273	Tmem63a	ENSMUSG00000026519	Tmem63a	ENSMUSG00000026519:Tmem63a.5	0.294748	chr1	180945440	180946440
ENSMUSG00000026312	0.894069	0.735783	0.0171788	0.176809	Cdh7	ENSMUSG00000026312	Cdh7	ENSMUSG00000026312:Cdh7.1	0.29811	chr1	109982188	109983188
ENSMUSG00000026355	0.748908	6.69876	4.50693e-19	4.87005e-17	Mcm6	ENSMUSG00000026355	Mcm6	ENSMUSG00000026355:Mcm6.3	0.300478	chr1	128359164	128360164
ENSMUSG00000026355	0.748908	6.69876	4.50693e-19	4.87005e-17	Mcm6	ENSMUSG00000026355	Mcm6	ENSMUSG00000026355:Mcm6.2	0.304413	chr1	128359147	128360147
ENSMUSG00000055013	0.773448	9.07495	1.31935e-15	1.11469e-13	Agap1	ENSMUSG00000055013	Agap1	ENSMUSG00000055013:Agap1.3	0.304987	chr1	89579714	89580714
ENSMUSG00000026104	5.47443	9.53038	2.10473e-87	7.0221e-85	Stat1	ENSMUSG00000026104	Stat1	ENSMUSG00000026104:Stat1	0.309947	chr1	52119010	52120010
ENSMUSG00000038530	1.8652	2.24878	6.98018e-14	5.22177e-12	Rgs4	ENSMUSG00000038530	Rgs4	ENSMUSG00000038530:Rgs4.1	0.314028	chr1	169747142	169748142
ENSMUSG00000060424	0.712398	5.51345	1.09501e-13	8.13831e-12	Pantr1	ENSMUSG00000060424	Pantr1	ENSMUSG00000060424:Pantr1.6	0.31434	chr1	42692653	42693653
ENSMUSG00000038530	1.8652	2.24878	6.98018e-14	5.22177e-12	Rgs4	ENSMUSG00000038530	Rgs4	ENSMUSG00000038530:Rgs4	0.316462	chr1	169747123	169748123
ENSMUSG00000060424	0.712398	5.51345	1.09501e-13	8.13831e-12	Pantr1	ENSMUSG00000060424	Pantr1	ENSMUSG00000060424:Pantr1.5	0.319613	chr1	42692628	42693628
ENSMUSG00000026312	0.894069	0.735783	0.0171788	0.176809	Cdh7	ENSMUSG00000026312	Cdh7	ENSMUSG00000026312:Cdh7.2	0.319661	chr1	109982471	109983471
ENSMUSG00000054702	1.73828	-1.759	0.0167952	0.173486	Ap1s3	ENSMUSG00000054702	Ap1s3	ENSMUSG00000054702:Ap1s3	0.324524	chr1	79671469	79672469
ENSMUSG00000060424	0.712398	5.51345	1.09501e-13	8.13831e-12	Pantr1	ENSMUSG00000060424	Pantr1	ENSMUSG00000060424:Pantr1.4	0.328089	chr1	42692593	42693593
ENSMUSG00000025938	2.55076	4.50952	2.51909e-88	8.59272e-86	Slco5a1	ENSMUSG00000025938	Slco5a1	ENSMUSG00000025938:Slco5a1.4	0.33457	chr1	12992150	12993150
ENSMUSG00000026222	6.06846	-0.798488	2.74722e-13	1.99001e-11	Sp100	ENSMUSG00000026222	Sp100	ENSMUSG00000026222:Sp100.5	0.335351	chr1	85702920	85703920
ENSMUSG00000102059	2.1223	1.17235	1.23294e-09	6.14559e-08	Gm20257	ENSMUSG00000102059	Gm20257	ENSMUSG00000102059:Gm20257	0.342711	chr1	58652119	58653119
ENSMUSG00000018417	0.847459	3.80466	4.37377e-06	0.000122723	Myo1b	ENSMUSG00000018417	Myo1b	ENSMUSG00000018417:Myo1b.12	0.342856	chr1	51915571	51916571
ENSMUSG00000018417	0.847459	3.80466	4.37377e-06	0.000122723	Myo1b	ENSMUSG00000018417	Myo1b	ENSMUSG00000018417:Myo1b.11	0.34547	chr1	51915441	51916441
ENSMUSG00000018417	0.847459	3.80466	4.37377e-06	0.000122723	Myo1b	ENSMUSG00000018417	Myo1b	ENSMUSG00000018417:Myo1b.10	0.350056	chr1	51915420	51916420
ENSMUSG00000039377	1.18827	0.818625	0.0196655	0.196967	Hlx	ENSMUSG00000039377	Hlx	ENSMUSG00000039377:Hlx.1	0.350459	chr1	184732119	184733119
ENSMUSG00000026628	1.57834	0.164261	0.000247859	0.00485604	Atf3	ENSMUSG00000026628	Atf3	ENSMUSG00000026628:Atf3	0.363081	chr1	191182608	191183608
ENSMUSG00000026104	5.47443	9.53038	2.10473e-87	7.0221e-85	Stat1	ENSMUSG00000026104	Stat1	ENSMUSG00000026104:Stat1.2	0.36469	chr1	52149736	52150736
ENSMUSG00000026628	1.57834	0.164261	0.000247859	0.00485604	Atf3	ENSMUSG00000026628	Atf3	ENSMUSG00000026628:Atf3.1	0.390552	chr1	191182840	191183840
ENSMUSG00000026126	2.4547	-0.193624	3.47976e-07	1.19409e-05	Ptpn18	ENSMUSG00000026126	Ptpn18	ENSMUSG00000026126:Ptpn18.1	0.392747	chr1	34462749	34463749
ENSMUSG00000026177	0.975501	-0.322735	0.0308077	0.276109	Slc11a1	ENSMUSG00000026177	Slc11a1	ENSMUSG00000026177:Slc11a1.2	0.417555	chr1	74376135	74377135
ENSMUSG00000026307	0.774672	4.43129	2.14353e-10	1.18186e-08	Scly	ENSMUSG00000026307	Scly	ENSMUSG00000026307:Scly.1	0.436342	chr1	91299410	91300410
ENSMUSG00000032487	1.05251	0.777925	0.00928454	0.108025	Ptgs2	ENSMUSG00000032487	Ptgs2	ENSMUSG00000032487:Ptgs2.1	0.458779	chr1	150099810	150100810
ENSMUSG00000070643	1.29652	3.96322	1.90791e-19	2.12182e-17	Sox13	ENSMUSG00000070643	Sox13	ENSMUSG00000070643:Sox13	0.488467	chr1	133385026	133386026
ENSMUSG00000047090	0.768948	6.001	1.14937e-17	1.12496e-15	Tmem198b	ENSMUSG00000047090	Tmem198b	ENSMUSG00000047090:Tmem198b	0.00118665	chr10	128803217	128804217
ENSMUSG00000020044	0.719747	7.64082	7.28979e-19	7.69519e-17	Timp3	ENSMUSG00000020044	Timp3	ENSMUSG00000020044:Timp3.2	0.00819815	chr10	86302332	86303332
ENSMUSG00000020205	0.613713	5.69629	2.27004e-09	1.09822e-07	Phlda1	ENSMUSG00000020205	Phlda1	ENSMUSG00000020205:Phlda1	0.0128768	chr10	111505764	111506764
ENSMUSG00000037855	0.556629	7.08727	1.00099e-11	6.27615e-10	Zfp365	ENSMUSG00000037855	Zfp365	ENSMUSG00000037855:Zfp365.2	0.0157631	chr10	67911935	67912935
ENSMUSG00000020132	0.671465	6.61417	1.07804e-15	9.176e-14	Rab21	ENSMUSG00000020132	Rab21	ENSMUSG00000020132:Rab21	0.0198914	chr10	115315093	115316093
ENSMUSG00000025357	0.869843	4.20011	1.43927e-10	8.19253e-09	Dgka	ENSMUSG00000025357	Dgka	ENSMUSG00000025357:Dgka.1	0.019987	chr10	128743575	128744575
ENSMUSG00000037868	0.959369	0.496651	0.0116153	0.129488	Egr2	ENSMUSG00000037868	Egr2	ENSMUSG00000037868:Egr2.4	0.0238196	chr10	67538161	67539161
ENSMUSG00000097069	5.59503	-2.93507	0.000224706	0.00445397	Gm16998	ENSMUSG00000097069	Gm16998	ENSMUSG00000097069:Gm16998	0.024278	chr10	54075400	54076400
ENSMUSG00000037855	0.556629	7.08727	1.00099e-11	6.27615e-10	Zfp365	ENSMUSG00000037855	Zfp365	ENSMUSG00000037855:Zfp365.3	0.0372008	chr10	67912162	67913162
ENSMUSG00000012819	1.40882	-1.15631	0.0217263	0.212284	Cdh23	ENSMUSG00000012819	Cdh23	ENSMUSG00000012819:Cdh23.7	0.0393012	chr10	60686757	60687757
ENSMUSG00000040195	0.609862	4.72206	1.55781e-07	5.70092e-06	Nemp1	ENSMUSG00000040195	Nemp1	ENSMUSG00000040195:Nemp1.2	0.0393236	chr10	127676543	127677543
ENSMUSG00000047090	0.768948	6.001	1.14937e-17	1.12496e-15	Tmem198b	ENSMUSG00000047090	Tmem198b	ENSMUSG00000047090:Tmem198b.1	0.0430496	chr10	128803461	128804461
ENSMUSG00000002578	1.38392	3.49129	1.25279e-16	1.13851e-14	Ikzf4	ENSMUSG00000002578	Ikzf4	ENSMUSG00000002578:Ikzf4.6	0.0610977	chr10	128668858	128669858
ENSMUSG00000074785	0.793801	6.18974	1.99551e-18	2.03596e-16	Plxnc1	ENSMUSG00000074785	Plxnc1	ENSMUSG00000074785:Plxnc1	0.0634519	chr10	94829046	94830046
ENSMUSG00000034771	0.537896	5.59414	7.76456e-08	2.9699e-06	Tle2	ENSMUSG00000034771	Tle2	ENSMUSG00000034771:Tle2.1	0.0641088	chr10	81574214	81575214
ENSMUSG00000012819	1.40882	-1.15631	0.0217263	0.212284	Cdh23	ENSMUSG00000012819	Cdh23	ENSMUSG00000012819:Cdh23	0.0730323	chr10	60305149	60306149
ENSMUSG00000037868	0.959369	0.496651	0.0116153	0.129488	Egr2	ENSMUSG00000037868	Egr2	ENSMUSG00000037868:Egr2.1	0.0809833	chr10	67535061	67536061
ENSMUSG00000020228	0.733298	3.75358	1.31946e-06	4.12516e-05	Helb	ENSMUSG00000020228	Helb	ENSMUSG00000020228:Helb.2	0.0907551	chr10	120112487	120113487
ENSMUSG00000020057	1.55062	0.6758	3.04916e-05	0.000730073	Dram1	ENSMUSG00000020057	Dram1	ENSMUSG00000020057:Dram1.2	0.0914611	chr10	88378580	88379580
ENSMUSG00000020228	0.733298	3.75358	1.31946e-06	4.12516e-05	Helb	ENSMUSG00000020228	Helb	ENSMUSG00000020228:Helb.1	0.0940565	chr10	120112365	120113365
ENSMUSG00000047090	0.768948	6.001	1.14937e-17	1.12496e-15	Tmem198b	ENSMUSG00000047090	Tmem198b	ENSMUSG00000047090:Tmem198b.2	0.0978917	chr10	128803870	128804870
ENSMUSG00000040009	0.787691	4.5941	7.33045e-12	4.66009e-10	Gnaz	ENSMUSG00000040009	Gnaz	ENSMUSG00000040009:Gnaz	0.0979366	chr10	74966671	74967671
ENSMUSG00000036875	0.504059	3.53968	0.00204002	0.0306224	Dna2	ENSMUSG00000036875	Dna2	ENSMUSG00000036875:Dna2	0.0991239	chr10	62946546	62947546
ENSMUSG00000059901	1.01276	2.10337	5.72783e-05	0.00129479	Adamts14	ENSMUSG00000059901	Adamts14	ENSMUSG00000059901:Adamts14	0.109837	chr10	61272742	61273742
ENSMUSG00000019794	1.11953	4.32219	2.96795e-19	3.23768e-17	Katna1	ENSMUSG00000019794	Katna1	ENSMUSG00000019794:Katna1	0.111108	chr10	7725482	7726482
ENSMUSG00000020027	2.06858	0.068309	4.15327e-06	0.000117086	Socs2	ENSMUSG00000020027	Socs2	ENSMUSG00000020027:Socs2.4	0.112948	chr10	95414327	95415327
ENSMUSG00000059901	1.01276	2.10337	5.72783e-05	0.00129479	Adamts14	ENSMUSG00000059901	Adamts14	ENSMUSG00000059901:Adamts14.1	0.114754	chr10	61272938	61273938
ENSMUSG00000019866	3.97244	2.26511	7.75251e-42	1.67147e-39	Crybg1	ENSMUSG00000019866	Crybg1	ENSMUSG00000019866:Crybg1.2	0.125273	chr10	44148353	44149353
ENSMUSG00000037846	1.22012	5.45437	1.10479e-35	2.10408e-33	Rtkn2	ENSMUSG00000037846	Rtkn2	ENSMUSG00000037846:Rtkn2.1	0.127649	chr10	67979184	67980184
ENSMUSG00000034771	0.537896	5.59414	7.76456e-08	2.9699e-06	Tle2	ENSMUSG00000034771	Tle2	ENSMUSG00000034771:Tle2	0.127912	chr10	81574039	81575039
ENSMUSG00000020205	0.613713	5.69629	2.27004e-09	1.09822e-07	Phlda1	ENSMUSG00000020205	Phlda1	ENSMUSG00000020205:Phlda1.1	0.131747	chr10	111507174	111508174
ENSMUSG00000020027	2.06858	0.068309	4.15327e-06	0.000117086	Socs2	ENSMUSG00000020027	Socs2	ENSMUSG00000020027:Socs2.9	0.133652	chr10	95416168	95417168
ENSMUSG00000037846	1.22012	5.45437	1.10479e-35	2.10408e-33	Rtkn2	ENSMUSG00000037846	Rtkn2	ENSMUSG00000037846:Rtkn2	0.13533	chr10	67979065	67980065
ENSMUSG00000020089	0.979981	5.78538	1.37889e-25	2.02008e-23	Ppa1	ENSMUSG00000020089	Ppa1	ENSMUSG00000020089:Ppa1	0.135956	chr10	61648030	61649030
ENSMUSG00000020089	0.979981	5.78538	1.37889e-25	2.02008e-23	Ppa1	ENSMUSG00000020089	Ppa1	ENSMUSG00000020089:Ppa1.1	0.139838	chr10	61648099	61649099
ENSMUSG00000025357	0.869843	4.20011	1.43927e-10	8.19253e-09	Dgka	ENSMUSG00000025357	Dgka	ENSMUSG00000025357:Dgka	0.149169	chr10	128730547	128731547
ENSMUSG00000019773	0.64344	4.21951	1.37212e-06	4.27227e-05	Fbxo5	ENSMUSG00000019773	Fbxo5	ENSMUSG00000019773:Fbxo5.1	0.150054	chr10	5805100	5806100
ENSMUSG00000019820	0.590733	5.86902	1.33475e-10	7.64523e-09	Utrn	ENSMUSG00000019820	Utrn	ENSMUSG00000019820:Utrn.2	0.151502	chr10	12614331	12615331
ENSMUSG00000037868	0.959369	0.496651	0.0116153	0.129488	Egr2	ENSMUSG00000037868	Egr2	ENSMUSG00000037868:Egr2.2	0.155339	chr10	67537347	67538347
ENSMUSG00000020027	2.06858	0.068309	4.15327e-06	0.000117086	Socs2	ENSMUSG00000020027	Socs2	ENSMUSG00000020027:Socs2.10	0.15639	chr10	95416357	95417357
ENSMUSG00000038774	0.599474	5.66831	2.19633e-10	1.20084e-08	Ascc3	ENSMUSG00000038774	Ascc3	ENSMUSG00000038774:Ascc3	0.15787	chr10	50592147	50593147
ENSMUSG00000020027	2.06858	0.068309	4.15327e-06	0.000117086	Socs2	ENSMUSG00000020027	Socs2	ENSMUSG00000020027:Socs2.11	0.16128	chr10	95416680	95417680
ENSMUSG00000010461	1.60942	2.35414	4.72292e-09	2.16525e-07	Eya4	ENSMUSG00000010461	Eya4	ENSMUSG00000010461:Eya4.5	0.168563	chr10	23349403	23350403
ENSMUSG00000039994	0.632217	4.8189	3.14784e-09	1.49292e-07	Timeless	ENSMUSG00000039994	Timeless	ENSMUSG00000039994:Timeless	0.170362	chr10	128231577	128232577
ENSMUSG00000037868	0.959369	0.496651	0.0116153	0.129488	Egr2	ENSMUSG00000037868	Egr2	ENSMUSG00000037868:Egr2.3	0.172691	chr10	67537408	67538408
ENSMUSG00000010461	1.60942	2.35414	4.72292e-09	2.16525e-07	Eya4	ENSMUSG00000010461	Eya4	ENSMUSG00000010461:Eya4.6	0.175127	chr10	23349636	23350636
ENSMUSG00000020027	2.06858	0.068309	4.15327e-06	0.000117086	Socs2	ENSMUSG00000020027	Socs2	ENSMUSG00000020027:Socs2.8	0.176001	chr10	95415712	95416712
ENSMUSG00000020044	0.719747	7.64082	7.28979e-19	7.69519e-17	Timp3	ENSMUSG00000020044	Timp3	ENSMUSG00000020044:Timp3	0.177622	chr10	86299850	86300850
ENSMUSG00000010461	1.60942	2.35414	4.72292e-09	2.16525e-07	Eya4	ENSMUSG00000010461	Eya4	ENSMUSG00000010461:Eya4.7	0.179624	chr10	23350286	23351286
ENSMUSG00000020044	0.719747	7.64082	7.28979e-19	7.69519e-17	Timp3	ENSMUSG00000020044	Timp3	ENSMUSG00000020044:Timp3.1	0.179742	chr10	86300033	86301033
ENSMUSG00000032714	0.724479	4.80602	2.52379e-11	1.54015e-09	Syde1	ENSMUSG00000032714	Syde1	ENSMUSG00000032714:Syde1	0.181924	chr10	78591464	78592464
ENSMUSG00000010461	1.60942	2.35414	4.72292e-09	2.16525e-07	Eya4	ENSMUSG00000010461	Eya4	ENSMUSG00000010461:Eya4.4	0.186993	chr10	23349387	23350387
ENSMUSG00000034771	0.537896	5.59414	7.76456e-08	2.9699e-06	Tle2	ENSMUSG00000034771	Tle2	ENSMUSG00000034771:Tle2.3	0.189595	chr10	81574809	81575809
ENSMUSG00000019820	0.590733	5.86902	1.33475e-10	7.64523e-09	Utrn	ENSMUSG00000019820	Utrn	ENSMUSG00000019820:Utrn.1	0.19148	chr10	12548379	12549379
ENSMUSG00000034771	0.537896	5.59414	7.76456e-08	2.9699e-06	Tle2	ENSMUSG00000034771	Tle2	ENSMUSG00000034771:Tle2.2	0.19148	chr10	81574739	81575739
ENSMUSG00000034771	0.537896	5.59414	7.76456e-08	2.9699e-06	Tle2	ENSMUSG00000034771	Tle2	ENSMUSG00000034771:Tle2.7	0.19391	chr10	81582021	81583021
ENSMUSG00000019966	0.682193	5.27243	9.45224e-08	3.58034e-06	Kitl	ENSMUSG00000019966	Kitl	ENSMUSG00000019966:Kitl.2	0.196432	chr10	100015394	100016394
ENSMUSG00000019842	0.717063	1.31458	0.0409519	0.336963	Traf3ip2	ENSMUSG00000019842	Traf3ip2	ENSMUSG00000019842:Traf3ip2.3	0.19659	chr10	39646192	39647192
ENSMUSG00000020089	0.979981	5.78538	1.37889e-25	2.02008e-23	Ppa1	ENSMUSG00000020089	Ppa1	ENSMUSG00000020089:Ppa1.2	0.197345	chr10	61662166	61663166
ENSMUSG00000040033	3.79549	6.99745	0	0	Stat2	ENSMUSG00000040033	Stat2	ENSMUSG00000040033:Stat2	0.201998	chr10	128270045	128271045
ENSMUSG00000019966	0.682193	5.27243	9.45224e-08	3.58034e-06	Kitl	ENSMUSG00000019966	Kitl	ENSMUSG00000019966:Kitl.1	0.202573	chr10	100015303	100016303
ENSMUSG00000019966	0.682193	5.27243	9.45224e-08	3.58034e-06	Kitl	ENSMUSG00000019966	Kitl	ENSMUSG00000019966:Kitl	0.204068	chr10	100015108	100016108
ENSMUSG00000019850	1.19751	1.51073	0.000235975	0.00464512	Tnfaip3	ENSMUSG00000019850	Tnfaip3	ENSMUSG00000019850:Tnfaip3.4	0.210865	chr10	19014910	19015910
ENSMUSG00000053329	0.541795	5.05873	1.98499e-07	7.11049e-06	Gatd3a	ENSMUSG00000053329	D10Jhu81e	ENSMUSG00000053329:Gatd3a.3	0.21312	chr10	78169278	78170278
ENSMUSG00000019850	1.19751	1.51073	0.000235975	0.00464512	Tnfaip3	ENSMUSG00000019850	Tnfaip3	ENSMUSG00000019850:Tnfaip3.3	0.217945	chr10	19014876	19015876
ENSMUSG00000053329	0.541795	5.05873	1.98499e-07	7.11049e-06	Gatd3a	ENSMUSG00000053329	D10Jhu81e	ENSMUSG00000053329:Gatd3a.2	0.218164	chr10	78169236	78170236
ENSMUSG00000020101	2.18184	2.8108	4.05017e-06	0.0001147	Vsir	ENSMUSG00000020101	Vsir	ENSMUSG00000020101:Vsir	0.220996	chr10	60346357	60347357
ENSMUSG00000012819	1.40882	-1.15631	0.0217263	0.212284	Cdh23	ENSMUSG00000012819	Cdh23	ENSMUSG00000012819:Cdh23.4	0.221321	chr10	60405953	60406953
ENSMUSG00000034771	0.537896	5.59414	7.76456e-08	2.9699e-06	Tle2	ENSMUSG00000034771	Tle2	ENSMUSG00000034771:Tle2.4	0.223453	chr10	81574895	81575895
ENSMUSG00000020101	2.18184	2.8108	4.05017e-06	0.0001147	Vsir	ENSMUSG00000020101	Vsir	ENSMUSG00000020101:Vsir.1	0.227071	chr10	60346476	60347476
ENSMUSG00000019850	1.19751	1.51073	0.000235975	0.00464512	Tnfaip3	ENSMUSG00000019850	Tnfaip3	ENSMUSG00000019850:Tnfaip3.5	0.229245	chr10	19015157	19016157
ENSMUSG00000034758	0.557156	3.89857	0.000104971	0.00224207	Tle6	ENSMUSG00000034758	Tle6	ENSMUSG00000034758:Tle6.5	0.229729	chr10	81596838	81597838
ENSMUSG00000034758	0.557156	3.89857	0.000104971	0.00224207	Tle6	ENSMUSG00000034758	Tle6	ENSMUSG00000034758:Tle6.6	0.240465	chr10	81596867	81597867
ENSMUSG00000019880	3.01622	0.567734	4.49781e-11	2.6769e-09	Rspo3	ENSMUSG00000019880	Rspo3	ENSMUSG00000019880:Rspo3.1	0.24181	chr10	29535367	29536367
ENSMUSG00000040033	3.79549	6.99745	0	0	Stat2	ENSMUSG00000040033	Stat2	ENSMUSG00000040033:Stat2.5	0.242749	chr10	128283585	128284585
ENSMUSG00000002578	1.38392	3.49129	1.25279e-16	1.13851e-14	Ikzf4	ENSMUSG00000002578	Ikzf4	ENSMUSG00000002578:Ikzf4.1	0.243049	chr10	128645293	128646293
ENSMUSG00000037868	0.959369	0.496651	0.0116153	0.129488	Egr2	ENSMUSG00000037868	Egr2	ENSMUSG00000037868:Egr2	0.243461	chr10	67534953	67535953
ENSMUSG00000019842	0.717063	1.31458	0.0409519	0.336963	Traf3ip2	ENSMUSG00000019842	Traf3ip2	ENSMUSG00000019842:Traf3ip2.2	0.244202	chr10	39645601	39646601
ENSMUSG00000019982	0.555896	2.45077	0.0150235	0.158847	Myb	ENSMUSG00000019982	Myb	ENSMUSG00000019982:Myb.3	0.244716	chr10	21160350	21161350
ENSMUSG00000002578	1.38392	3.49129	1.25279e-16	1.13851e-14	Ikzf4	ENSMUSG00000002578	Ikzf4	ENSMUSG00000002578:Ikzf4.4	0.246572	chr10	128645344	128646344
ENSMUSG00000034758	0.557156	3.89857	0.000104971	0.00224207	Tle6	ENSMUSG00000034758	Tle6	ENSMUSG00000034758:Tle6.7	0.248511	chr10	81597090	81598090
ENSMUSG00000097372	1.71212	-1.24551	0.0031192	0.0436135	Gm26876	ENSMUSG00000097372	Gm26876	ENSMUSG00000097372:Gm26876	0.248692	chr10	128645362	128646362
ENSMUSG00000019982	0.555896	2.45077	0.0150235	0.158847	Myb	ENSMUSG00000019982	Myb	ENSMUSG00000019982:Myb.5	0.248967	chr10	21160484	21161484
ENSMUSG00000020027	2.06858	0.068309	4.15327e-06	0.000117086	Socs2	ENSMUSG00000020027	Socs2	ENSMUSG00000020027:Socs2.5	0.250089	chr10	95414783	95415783
ENSMUSG00000002578	1.38392	3.49129	1.25279e-16	1.13851e-14	Ikzf4	ENSMUSG00000002578	Ikzf4	ENSMUSG00000002578:Ikzf4.3	0.250635	chr10	128645326	128646326
ENSMUSG00000002578	1.38392	3.49129	1.25279e-16	1.13851e-14	Ikzf4	ENSMUSG00000002578	Ikzf4	ENSMUSG00000002578:Ikzf4.2	0.253794	chr10	128645307	128646307
ENSMUSG00000002578	1.38392	3.49129	1.25279e-16	1.13851e-14	Ikzf4	ENSMUSG00000002578	Ikzf4	ENSMUSG00000002578:Ikzf4.5	0.253847	chr10	128645491	128646491
ENSMUSG00000034771	0.537896	5.59414	7.76456e-08	2.9699e-06	Tle2	ENSMUSG00000034771	Tle2	ENSMUSG00000034771:Tle2.5	0.256805	chr10	81574993	81575993
ENSMUSG00000074785	0.793801	6.18974	1.99551e-18	2.03596e-16	Plxnc1	ENSMUSG00000074785	Plxnc1	ENSMUSG00000074785:Plxnc1.4	0.25844	chr10	94944335	94945335
ENSMUSG00000019982	0.555896	2.45077	0.0150235	0.158847	Myb	ENSMUSG00000019982	Myb	ENSMUSG00000019982:Myb.4	0.258827	chr10	21160405	21161405
ENSMUSG00000020250	0.633024	8.15723	3.09231e-15	2.52851e-13	Txnrd1	ENSMUSG00000020250	Txnrd1	ENSMUSG00000020250:Txnrd1.1	0.262291	chr10	82858697	82859697
ENSMUSG00000075266	0.752559	2.68854	0.000389704	0.00728829	Cenpw	ENSMUSG00000075266	Cenpw	ENSMUSG00000075266:Cenpw	0.279651	chr10	30199992	30200992
ENSMUSG00000020250	0.633024	8.15723	3.09231e-15	2.52851e-13	Txnrd1	ENSMUSG00000020250	Txnrd1	ENSMUSG00000020250:Txnrd1.2	0.279805	chr10	82859779	82860779
ENSMUSG00000075266	0.752559	2.68854	0.000389704	0.00728829	Cenpw	ENSMUSG00000075266	Cenpw	ENSMUSG00000075266:Cenpw.1	0.281563	chr10	30200060	30201060
ENSMUSG00000037855	0.556629	7.08727	1.00099e-11	6.27615e-10	Zfp365	ENSMUSG00000037855	Zfp365	ENSMUSG00000037855:Zfp365	0.290671	chr10	67898507	67899507
ENSMUSG00000020027	2.06858	0.068309	4.15327e-06	0.000117086	Socs2	ENSMUSG00000020027	Socs2	ENSMUSG00000020027:Socs2.6	0.291643	chr10	95414984	95415984
ENSMUSG00000020027	2.06858	0.068309	4.15327e-06	0.000117086	Socs2	ENSMUSG00000020027	Socs2	ENSMUSG00000020027:Socs2.7	0.293847	chr10	95415499	95416499
ENSMUSG00000035835	0.754395	3.29771	2.15486e-05	0.000530395	Plppr3	ENSMUSG00000035835	Plppr3	ENSMUSG00000035835:Plppr3.2	0.300969	chr10	79873868	79874868
ENSMUSG00000019820	0.590733	5.86902	1.33475e-10	7.64523e-09	Utrn	ENSMUSG00000019820	Utrn	ENSMUSG00000019820:Utrn.9	0.30167	chr10	12867675	12868675
ENSMUSG00000020185	0.744672	4.53176	7.58924e-10	3.90641e-08	E2f7	ENSMUSG00000020185	E2f7	ENSMUSG00000020185:E2f7.1	0.304788	chr10	110745050	110746050
ENSMUSG00000020185	0.744672	4.53176	7.58924e-10	3.90641e-08	E2f7	ENSMUSG00000020185	E2f7	ENSMUSG00000020185:E2f7	0.311575	chr10	110744954	110745954
ENSMUSG00000034771	0.537896	5.59414	7.76456e-08	2.9699e-06	Tle2	ENSMUSG00000034771	Tle2	ENSMUSG00000034771:Tle2.6	0.313018	chr10	81580312	81581312
ENSMUSG00000035835	0.754395	3.29771	2.15486e-05	0.000530395	Plppr3	ENSMUSG00000035835	Plppr3	ENSMUSG00000035835:Plppr3.1	0.319264	chr10	79873724	79874724
ENSMUSG00000020250	0.633024	8.15723	3.09231e-15	2.52851e-13	Txnrd1	ENSMUSG00000020250	Txnrd1	ENSMUSG00000020250:Txnrd1.3	0.330195	chr10	82859983	82860983
ENSMUSG00000035864	0.802072	2.63712	0.000232641	0.00459135	Syt1	ENSMUSG00000035864	Syt1	ENSMUSG00000035864:Syt1.3	0.337105	chr10	109010462	109011462
ENSMUSG00000035864	0.802072	2.63712	0.000232641	0.00459135	Syt1	ENSMUSG00000035864	Syt1	ENSMUSG00000035864:Syt1.4	0.337204	chr10	109010479	109011479
ENSMUSG00000025395	0.627804	4.57415	9.84598e-08	3.71627e-06	Prim1	ENSMUSG00000025395	Prim1	ENSMUSG00000025395:Prim1	0.341238	chr10	128014660	128015660
ENSMUSG00000019820	0.590733	5.86902	1.33475e-10	7.64523e-09	Utrn	ENSMUSG00000019820	Utrn	ENSMUSG00000019820:Utrn.10	0.344708	chr10	12867781	12868781
ENSMUSG00000001663	0.660818	2.3808	0.00555998	0.0709282	Gstt1	ENSMUSG00000001663	Gstt1	ENSMUSG00000001663:Gstt1.2	0.345683	chr10	75798084	75799084
ENSMUSG00000039232	1.13079	-1.12729	0.0421654	0.344843	Stx11	ENSMUSG00000039232	Stx11	ENSMUSG00000039232:Stx11.1	0.347807	chr10	12963798	12964798
ENSMUSG00000039232	1.13079	-1.12729	0.0421654	0.344843	Stx11	ENSMUSG00000039232	Stx11	ENSMUSG00000039232:Stx11	0.349622	chr10	12963760	12964760
ENSMUSG00000035835	0.754395	3.29771	2.15486e-05	0.000530395	Plppr3	ENSMUSG00000035835	Plppr3	ENSMUSG00000035835:Plppr3.3	0.35417	chr10	79873899	79874899
ENSMUSG00000000731	3.60205	-2.72194	0.00156026	0.0244067	Aire	ENSMUSG00000000731	Aire	ENSMUSG00000000731:Aire.3	0.371715	chr10	78043110	78044110
ENSMUSG00000040195	0.609862	4.72206	1.55781e-07	5.70092e-06	Nemp1	ENSMUSG00000040195	Nemp1	ENSMUSG00000040195:Nemp1	0.374317	chr10	127666379	127667379
ENSMUSG00000056758	0.91279	3.19743	0.000122435	0.0025718	Hmga2	ENSMUSG00000056758	Hmga2	ENSMUSG00000056758:Hmga2.1	0.382966	chr10	120475969	120476969
ENSMUSG00000000731	3.60205	-2.72194	0.00156026	0.0244067	Aire	ENSMUSG00000000731	Aire	ENSMUSG00000000731:Aire.2	0.389168	chr10	78043076	78044076
ENSMUSG00000056758	0.91279	3.19743	0.000122435	0.0025718	Hmga2	ENSMUSG00000056758	Hmga2	ENSMUSG00000056758:Hmga2	0.394169	chr10	120475792	120476792
ENSMUSG00000035835	0.754395	3.29771	2.15486e-05	0.000530395	Plppr3	ENSMUSG00000035835	Plppr3	ENSMUSG00000035835:Plppr3.5	0.397335	chr10	79874134	79875134
ENSMUSG00000040195	0.609862	4.72206	1.55781e-07	5.70092e-06	Nemp1	ENSMUSG00000040195	Nemp1	ENSMUSG00000040195:Nemp1.1	0.39753	chr10	127666622	127667622
ENSMUSG00000053329	0.541795	5.05873	1.98499e-07	7.11049e-06	Gatd3a	ENSMUSG00000053329	D10Jhu81e	ENSMUSG00000053329:Gatd3a.1	0.401596	chr10	78168574	78169574
ENSMUSG00000035835	0.754395	3.29771	2.15486e-05	0.000530395	Plppr3	ENSMUSG00000035835	Plppr3	ENSMUSG00000035835:Plppr3.4	0.416369	chr10	79874070	79875070
ENSMUSG00000019850	1.19751	1.51073	0.000235975	0.00464512	Tnfaip3	ENSMUSG00000019850	Tnfaip3	ENSMUSG00000019850:Tnfaip3.2	0.417774	chr10	19014082	19015082
ENSMUSG00000019992	1.58142	3.35449	5.3273e-19	5.70258e-17	Mtfr2	ENSMUSG00000019992	Mtfr2	ENSMUSG00000019992:Mtfr2	0.433624	chr10	20347272	20348272
ENSMUSG00000020186	0.843399	1.76379	0.00286259	0.0405214	Csrp2	ENSMUSG00000020186	Csrp2	ENSMUSG00000020186:Csrp2	0.445382	chr10	110919267	110920267
ENSMUSG00000019992	1.58142	3.35449	5.3273e-19	5.70258e-17	Mtfr2	ENSMUSG00000019992	Mtfr2	ENSMUSG00000019992:Mtfr2.1	0.453318	chr10	20347485	20348485
ENSMUSG00000020186	0.843399	1.76379	0.00286259	0.0405214	Csrp2	ENSMUSG00000020186	Csrp2	ENSMUSG00000020186:Csrp2.1	0.474243	chr10	110919675	110920675
ENSMUSG00000019820	0.590733	5.86902	1.33475e-10	7.64523e-09	Utrn	ENSMUSG00000019820	Utrn	ENSMUSG00000019820:Utrn.11	0.485366	chr10	12868865	12869865
ENSMUSG00000020914	0.863364	8.99239	1.32401e-18	1.3754e-16	Top2a	ENSMUSG00000020914	Top2a	ENSMUSG00000020914:Top2a.5	0.000247962	chr11	99023678	99024678
ENSMUSG00000020914	0.863364	8.99239	1.32401e-18	1.3754e-16	Top2a	ENSMUSG00000020914	Top2a	ENSMUSG00000020914:Top2a.6	0.00140575	chr11	99023689	99024689
ENSMUSG00000020737	0.584344	6.53462	4.72039e-12	3.07788e-10	Jpt1	ENSMUSG00000020737	Jpt1	ENSMUSG00000020737:Jpt1.4	0.00240464	chr11	115513887	115514887
ENSMUSG00000039110	1.51997	-1.97111	0.0359181	0.309588	Mycbpap	ENSMUSG00000039110	Mycbpap	ENSMUSG00000039110:Mycbpap.4	0.00291137	chr11	94521056	94522056
ENSMUSG00000020737	0.584344	6.53462	4.72039e-12	3.07788e-10	Jpt1	ENSMUSG00000020737	Jpt1	ENSMUSG00000020737:Jpt1.2	0.00413141	chr11	115513848	115514848
ENSMUSG00000020330	0.513748	6.09974	1.68905e-05	0.000423495	Hmmr	ENSMUSG00000020330	Hmmr	ENSMUSG00000020330:Hmmr	0.00422505	chr11	40732891	40733891
ENSMUSG00000020330	0.513748	6.09974	1.68905e-05	0.000423495	Hmmr	ENSMUSG00000020330	Hmmr	ENSMUSG00000020330:Hmmr.1	0.0042877	chr11	40732919	40733919
ENSMUSG00000020737	0.584344	6.53462	4.72039e-12	3.07788e-10	Jpt1	ENSMUSG00000020737	Jpt1	ENSMUSG00000020737:Jpt1.3	0.00446973	chr11	115513871	115514871
ENSMUSG00000065251	13.4478	3.84784	4.1806e-147	1.8734e-144	NA	ENSMUSG00000065251	Gm23971	ENSMUSG00000065251:Gm23971	0.014023	chr11	101645430	101646430
ENSMUSG00000020932	1.16502	5.5651	0.0200936	0.200227	Gfap	ENSMUSG00000020932	Gfap	ENSMUSG00000020932:Gfap.2	0.0146966	chr11	102900412	102901412
ENSMUSG00000020737	0.584344	6.53462	4.72039e-12	3.07788e-10	Jpt1	ENSMUSG00000020737	Jpt1	ENSMUSG00000020737:Jpt1	0.0150774	chr11	115513616	115514616
ENSMUSG00000020737	0.584344	6.53462	4.72039e-12	3.07788e-10	Jpt1	ENSMUSG00000020737	Jpt1	ENSMUSG00000020737:Jpt1.1	0.0154801	chr11	115513648	115514648
ENSMUSG00000034614	2.06542	5.09965	6.32502e-80	1.99382e-77	Pik3ip1	ENSMUSG00000034614	Pik3ip1	ENSMUSG00000034614:Pik3ip1.5	0.018285	chr11	3332450	3333450
ENSMUSG00000039110	1.51997	-1.97111	0.0359181	0.309588	Mycbpap	ENSMUSG00000039110	Mycbpap	ENSMUSG00000039110:Mycbpap.5	0.0185419	chr11	94521242	94522242
ENSMUSG00000063564	0.891821	0.930474	0.0115066	0.128561	Col23a1	ENSMUSG00000063564	Col23a1	ENSMUSG00000063564:Col23a1	0.0292077	chr11	51289398	51290398
ENSMUSG00000000782	1.95007	2.62144	1.70926e-17	1.65948e-15	Tcf7	ENSMUSG00000000782	Tcf7	ENSMUSG00000000782:Tcf7.1	0.0296291	chr11	52282071	52283071
ENSMUSG00000020476	0.951471	6.58477	6.74259e-28	1.08137e-25	Dbnl	ENSMUSG00000020476	Dbnl	ENSMUSG00000020476:Dbnl	0.0324923	chr11	5787987	5788987
ENSMUSG00000040978	0.86247	0.225772	0.0341636	0.298249	Gm11992	ENSMUSG00000040978	Gm11992	ENSMUSG00000040978:Gm11992	0.036912	chr11	9048072	9049072
ENSMUSG00000041695	1.23723	2.1391	7.86211e-07	2.55956e-05	Kcnj2	ENSMUSG00000041695	Kcnj2	ENSMUSG00000041695:Kcnj2	0.0387386	chr11	111065642	111066642
ENSMUSG00000034708	0.789683	6.26251	1.22146e-19	1.36839e-17	Grn	ENSMUSG00000034708	Grn	ENSMUSG00000034708:Grn.5	0.0400674	chr11	102434196	102435196
ENSMUSG00000040350	0.993105	1.39374	0.00142477	0.0225418	Trim7	ENSMUSG00000040350	Trim7	ENSMUSG00000040350:Trim7	0.0478094	chr11	48825618	48826618
ENSMUSG00000037275	1.0324	6.17296	3.2254e-31	5.64853e-29	Gemin5	ENSMUSG00000037275	Gemin5	ENSMUSG00000037275:Gemin5.2	0.0544574	chr11	58168039	58169039
ENSMUSG00000039055	0.821867	2.98521	2.58254e-05	0.000626554	Eme1	ENSMUSG00000039055	Eme1	ENSMUSG00000039055:Eme1.2	0.0562254	chr11	94653171	94654171
ENSMUSG00000040350	0.993105	1.39374	0.00142477	0.0225418	Trim7	ENSMUSG00000040350	Trim7	ENSMUSG00000040350:Trim7.1	0.0655523	chr11	48836952	48837952
ENSMUSG00000035373	3.79571	-2.59704	0.000749318	0.0129245	Ccl7	ENSMUSG00000035373	Ccl7	ENSMUSG00000035373:Ccl7	0.0687915	chr11	82045190	82046190
ENSMUSG00000017716	0.659037	5.34173	2.97431e-11	1.81025e-09	Birc5	ENSMUSG00000017716	Birc5	ENSMUSG00000017716:Birc5.1	0.0712441	chr11	117848797	117849797
ENSMUSG00000098650	1.38738	1.31997	3.19579e-05	0.000763183	Commd1b	ENSMUSG00000098650	Gm28048	ENSMUSG00000098650:Commd1b	0.073946	chr11	22981590	22982590
ENSMUSG00000020300	0.633155	7.27849	1.37803e-14	1.06939e-12	Cpeb4	ENSMUSG00000020300	Cpeb4	ENSMUSG00000020300:Cpeb4.1	0.0753051	chr11	31872753	31873753
ENSMUSG00000018899	6.50248	8.08504	0	0	Irf1	ENSMUSG00000018899	Irf1	ENSMUSG00000018899:Irf1.1	0.0761563	chr11	53769971	53770971
ENSMUSG00000017716	0.659037	5.34173	2.97431e-11	1.81025e-09	Birc5	ENSMUSG00000017716	Birc5	ENSMUSG00000017716:Birc5	0.0780201	chr11	117848729	117849729
ENSMUSG00000007646	0.608139	2.87665	0.0021736	0.0323513	Rad51c	ENSMUSG00000007646	Rad51c	ENSMUSG00000007646:Rad51c.2	0.0811777	chr11	87404023	87405023
ENSMUSG00000034614	2.06542	5.09965	6.32502e-80	1.99382e-77	Pik3ip1	ENSMUSG00000034614	Pik3ip1	ENSMUSG00000034614:Pik3ip1.3	0.081696	chr11	3331568	3332568
ENSMUSG00000007646	0.608139	2.87665	0.0021736	0.0323513	Rad51c	ENSMUSG00000007646	Rad51c	ENSMUSG00000007646:Rad51c.1	0.082448	chr11	87404006	87405006
ENSMUSG00000007646	0.608139	2.87665	0.0021736	0.0323513	Rad51c	ENSMUSG00000007646	Rad51c	ENSMUSG00000007646:Rad51c	0.0828152	chr11	87403923	87404923
ENSMUSG00000020357	2.00648	0.444742	2.06537e-06	6.17828e-05	Flt4	ENSMUSG00000020357	Flt4	ENSMUSG00000020357:Flt4	0.0859567	chr11	49608741	49609741
ENSMUSG00000006930	0.962323	7.07126	1.54301e-23	2.11161e-21	Hap1	ENSMUSG00000006930	Hap1	ENSMUSG00000006930:Hap1.4	0.0878066	chr11	100355628	100356628
ENSMUSG00000034708	0.789683	6.26251	1.22146e-19	1.36839e-17	Grn	ENSMUSG00000034708	Grn	ENSMUSG00000034708:Grn.4	0.0885831	chr11	102433578	102434578
ENSMUSG00000039055	0.821867	2.98521	2.58254e-05	0.000626554	Eme1	ENSMUSG00000039055	Eme1	ENSMUSG00000039055:Eme1.3	0.0935202	chr11	94653464	94654464
ENSMUSG00000000567	0.771214	7.65754	5.57186e-20	6.35108e-18	Sox9	ENSMUSG00000000567	Sox9	ENSMUSG00000000567:Sox9	0.0943745	chr11	112781702	112782702
ENSMUSG00000002699	1.79432	-1.68638	0.00556154	0.0709282	Lcp2	ENSMUSG00000002699	Lcp2	ENSMUSG00000002699:Lcp2.2	0.100616	chr11	34077655	34078655
ENSMUSG00000044966	0.817606	1.66706	0.00456176	0.0603827	Fbxo48	ENSMUSG00000044966	Fbxo48	ENSMUSG00000044966:Fbxo48	0.101579	chr11	16950870	16951870
ENSMUSG00000019303	0.640897	2.7434	0.00288745	0.0408227	Psmc3ip	ENSMUSG00000019303	Psmc3ip	ENSMUSG00000019303:Psmc3ip.2	0.102576	chr11	101094900	101095900
ENSMUSG00000034614	2.06542	5.09965	6.32502e-80	1.99382e-77	Pik3ip1	ENSMUSG00000034614	Pik3ip1	ENSMUSG00000034614:Pik3ip1.4	0.103242	chr11	3331929	3332929
ENSMUSG00000019303	0.640897	2.7434	0.00288745	0.0408227	Psmc3ip	ENSMUSG00000019303	Psmc3ip	ENSMUSG00000019303:Psmc3ip.1	0.104734	chr11	101094876	101095876
ENSMUSG00000019303	0.640897	2.7434	0.00288745	0.0408227	Psmc3ip	ENSMUSG00000019303	Psmc3ip	ENSMUSG00000019303:Psmc3ip.3	0.105868	chr11	101094936	101095936
ENSMUSG00000018899	6.50248	8.08504	0	0	Irf1	ENSMUSG00000018899	Irf1	ENSMUSG00000018899:Irf1	0.106067	chr11	53769537	53770537
ENSMUSG00000034329	1.2622	4.11635	7.4556e-19	7.85209e-17	Brip1	ENSMUSG00000034329	Brip1	ENSMUSG00000034329:Brip1.1	0.115553	chr11	86200693	86201693
ENSMUSG00000020493	0.654177	5.88207	9.6646e-10	4.93024e-08	Prr11	ENSMUSG00000020493	Prr11	ENSMUSG00000020493:Prr11	0.116474	chr11	87108208	87109208
ENSMUSG00000007646	0.608139	2.87665	0.0021736	0.0323513	Rad51c	ENSMUSG00000007646	Rad51c	ENSMUSG00000007646:Rad51c.3	0.117392	chr11	87404454	87405454
ENSMUSG00000020611	1.02332	7.83785	1.66814e-34	3.08693e-32	Gna13	ENSMUSG00000020611	Gna13	ENSMUSG00000020611:Gna13	0.117587	chr11	109362309	109363309
ENSMUSG00000034329	1.2622	4.11635	7.4556e-19	7.85209e-17	Brip1	ENSMUSG00000034329	Brip1	ENSMUSG00000034329:Brip1	0.119386	chr11	86200665	86201665
ENSMUSG00000040699	1.00048	4.67234	2.5989e-17	2.47997e-15	Limd2	ENSMUSG00000040699	Limd2	ENSMUSG00000040699:Limd2.1	0.124833	chr11	106159427	106160427
ENSMUSG00000034708	0.789683	6.26251	1.22146e-19	1.36839e-17	Grn	ENSMUSG00000034708	Grn	ENSMUSG00000034708:Grn.1	0.129138	chr11	102429996	102430996
ENSMUSG00000085208	0.759196	6.4431	4.68274e-17	4.37707e-15	Brip1os	ENSMUSG00000085208	Brip1os	ENSMUSG00000085208:Brip1os	0.130639	chr11	86200854	86201854
ENSMUSG00000020415	0.523377	4.86555	8.55707e-07	2.75635e-05	Pttg1	ENSMUSG00000020415	Pttg1	ENSMUSG00000020415:Pttg1.6	0.134994	chr11	43425751	43426751
ENSMUSG00000040699	1.00048	4.67234	2.5989e-17	2.47997e-15	Limd2	ENSMUSG00000040699	Limd2	ENSMUSG00000040699:Limd2.2	0.139394	chr11	106159642	106160642
ENSMUSG00000017499	0.739191	4.14427	7.94663e-08	3.03446e-06	Cdc6	ENSMUSG00000017499	Cdc6	ENSMUSG00000017499:Cdc6	0.144509	chr11	98907303	98908303
ENSMUSG00000034708	0.789683	6.26251	1.22146e-19	1.36839e-17	Grn	ENSMUSG00000034708	Grn	ENSMUSG00000034708:Grn	0.146881	chr11	102429796	102430796
ENSMUSG00000006930	0.962323	7.07126	1.54301e-23	2.11161e-21	Hap1	ENSMUSG00000006930	Hap1	ENSMUSG00000006930:Hap1.3	0.147229	chr11	100355587	100356587
ENSMUSG00000020415	0.523377	4.86555	8.55707e-07	2.75635e-05	Pttg1	ENSMUSG00000020415	Pttg1	ENSMUSG00000020415:Pttg1.5	0.147763	chr11	43425720	43426720
ENSMUSG00000020415	0.523377	4.86555	8.55707e-07	2.75635e-05	Pttg1	ENSMUSG00000020415	Pttg1	ENSMUSG00000020415:Pttg1.4	0.157803	chr11	43425702	43426702
ENSMUSG00000017499	0.739191	4.14427	7.94663e-08	3.03446e-06	Cdc6	ENSMUSG00000017499	Cdc6	ENSMUSG00000017499:Cdc6.1	0.158905	chr11	98907629	98908629
ENSMUSG00000053113	1.08788	4.06055	1.7478e-15	1.46316e-13	Socs3	ENSMUSG00000053113	Socs3	ENSMUSG00000053113:Socs3.2	0.160231	chr11	117969547	117970547
ENSMUSG00000017550	0.610367	5.25212	9.57154e-10	4.88822e-08	Atad5	ENSMUSG00000017550	Atad5	ENSMUSG00000017550:Atad5	0.161679	chr11	80088878	80089878
ENSMUSG00000020941	1.11319	3.05106	1.15366e-08	4.96996e-07	Map3k14	ENSMUSG00000020941	Map3k14	ENSMUSG00000020941:Map3k14.3	0.16252	chr11	103266972	103267972
ENSMUSG00000034614	2.06542	5.09965	6.32502e-80	1.99382e-77	Pik3ip1	ENSMUSG00000034614	Pik3ip1	ENSMUSG00000034614:Pik3ip1	0.164912	chr11	3329879	3330879
ENSMUSG00000053113	1.08788	4.06055	1.7478e-15	1.46316e-13	Socs3	ENSMUSG00000053113	Socs3	ENSMUSG00000053113:Socs3	0.165326	chr11	117968686	117969686
ENSMUSG00000053113	1.08788	4.06055	1.7478e-15	1.46316e-13	Socs3	ENSMUSG00000053113	Socs3	ENSMUSG00000053113:Socs3.1	0.165935	chr11	117968951	117969951
ENSMUSG00000004040	1.91527	8.67315	7.51889e-116	2.88801e-113	Stat3	ENSMUSG00000004040	Stat3	ENSMUSG00000004040:Stat3.5	0.165985	chr11	100898028	100899028
ENSMUSG00000078635	3.48646	-2.48179	0.000585508	0.0103932	1700028N14Rik	ENSMUSG00000078635	1700028N14Rik	ENSMUSG00000078635:1700028N14Rik	0.170609	chr11	103267245	103268245
ENSMUSG00000004040	1.91527	8.67315	7.51889e-116	2.88801e-113	Stat3	ENSMUSG00000004040	Stat3	ENSMUSG00000004040:Stat3.13	0.173827	chr11	100939040	100940040
ENSMUSG00000004040	1.91527	8.67315	7.51889e-116	2.88801e-113	Stat3	ENSMUSG00000004040	Stat3	ENSMUSG00000004040:Stat3.12	0.17581	chr11	100938979	100939979
ENSMUSG00000017677	0.604842	6.25316	3.45115e-12	2.27756e-10	Wsb1	ENSMUSG00000017677	Wsb1	ENSMUSG00000017677:Wsb1.4	0.176385	chr11	79253970	79254970
ENSMUSG00000010277	0.616112	9.32506	3.43438e-13	2.476e-11	Bltp2	ENSMUSG00000010277	2610507B11Rik	ENSMUSG00000010277:2610507B11Rik	0.177384	chr11	78261230	78262230
ENSMUSG00000004040	1.91527	8.67315	7.51889e-116	2.88801e-113	Stat3	ENSMUSG00000004040	Stat3	ENSMUSG00000004040:Stat3.11	0.177945	chr11	100938904	100939904
ENSMUSG00000020415	0.523377	4.86555	8.55707e-07	2.75635e-05	Pttg1	ENSMUSG00000020415	Pttg1	ENSMUSG00000020415:Pttg1.3	0.179431	chr11	43425618	43426618
ENSMUSG00000086245	3.61953	-1.43827	3.71402e-06	0.000105704	Gm16170	ENSMUSG00000086245	Gm16170	ENSMUSG00000086245:Gm16170	0.1819	chr11	48852993	48853993
ENSMUSG00000004040	1.91527	8.67315	7.51889e-116	2.88801e-113	Stat3	ENSMUSG00000004040	Stat3	ENSMUSG00000004040:Stat3.10	0.182437	chr11	100938880	100939880
ENSMUSG00000010277	0.616112	9.32506	3.43438e-13	2.476e-11	Bltp2	ENSMUSG00000010277	2610507B11Rik	ENSMUSG00000010277:2610507B11Rik.1	0.185165	chr11	78261950	78262950
ENSMUSG00000017677	0.604842	6.25316	3.45115e-12	2.27756e-10	Wsb1	ENSMUSG00000017677	Wsb1	ENSMUSG00000017677:Wsb1.5	0.18869	chr11	79254170	79255170
ENSMUSG00000004040	1.91527	8.67315	7.51889e-116	2.88801e-113	Stat3	ENSMUSG00000004040	Stat3	ENSMUSG00000004040:Stat3.2	0.19547	chr11	100893302	100894302
ENSMUSG00000004040	1.91527	8.67315	7.51889e-116	2.88801e-113	Stat3	ENSMUSG00000004040	Stat3	ENSMUSG00000004040:Stat3.1	0.197622	chr11	100893243	100894243
ENSMUSG00000025582	0.76805	6.72275	1.21824e-18	1.26842e-16	Nptx1	ENSMUSG00000025582	Nptx1	ENSMUSG00000025582:Nptx1	0.205822	chr11	119547253	119548253
ENSMUSG00000040711	0.95726	7.21257	4.21358e-29	7.00343e-27	Sh3pxd2b	ENSMUSG00000040711	Sh3pxd2b	ENSMUSG00000040711:Sh3pxd2b	0.219118	chr11	32347308	32348308
ENSMUSG00000020387	1.71585	4.3515	1.00346e-37	1.98555e-35	Jade2	ENSMUSG00000020387	Jade2	ENSMUSG00000020387:Jade2	0.224061	chr11	51856625	51857625
ENSMUSG00000081769	7.32504	1.99205	4.36846e-59	1.19565e-56	Gm12216	ENSMUSG00000081769	Gm12216	ENSMUSG00000081769:Gm12216.1	0.240483	chr11	53849548	53850548
ENSMUSG00000004040	1.91527	8.67315	7.51889e-116	2.88801e-113	Stat3	ENSMUSG00000004040	Stat3	ENSMUSG00000004040:Stat3.8	0.241245	chr11	100905346	100906346
ENSMUSG00000040699	1.00048	4.67234	2.5989e-17	2.47997e-15	Limd2	ENSMUSG00000040699	Limd2	ENSMUSG00000040699:Limd2	0.245	chr11	106158909	106159909
ENSMUSG00000040350	0.993105	1.39374	0.00142477	0.0225418	Trim7	ENSMUSG00000040350	Trim7	ENSMUSG00000040350:Trim7.2	0.247721	chr11	48837992	48838992
ENSMUSG00000000782	1.95007	2.62144	1.70926e-17	1.65948e-15	Tcf7	ENSMUSG00000000782	Tcf7	ENSMUSG00000000782:Tcf7.2	0.253183	chr11	52282831	52283831
ENSMUSG00000001507	0.930548	2.47463	6.49891e-05	0.00145329	Itga3	ENSMUSG00000001507	Itga3	ENSMUSG00000001507:Itga3.4	0.263055	chr11	95076299	95077299
ENSMUSG00000040699	1.00048	4.67234	2.5989e-17	2.47997e-15	Limd2	ENSMUSG00000040699	Limd2	ENSMUSG00000040699:Limd2.3	0.266821	chr11	106160360	106161360
ENSMUSG00000034708	0.789683	6.26251	1.22146e-19	1.36839e-17	Grn	ENSMUSG00000034708	Grn	ENSMUSG00000034708:Grn.2	0.272695	chr11	102432263	102433263
ENSMUSG00000061981	0.745798	5.98855	5.0797e-15	4.06625e-13	Flot2	ENSMUSG00000061981	Flot2	ENSMUSG00000061981:Flot2	0.281469	chr11	78037435	78038435
ENSMUSG00000020415	0.523377	4.86555	8.55707e-07	2.75635e-05	Pttg1	ENSMUSG00000020415	Pttg1	ENSMUSG00000020415:Pttg1.2	0.282474	chr11	43425481	43426481
ENSMUSG00000020415	0.523377	4.86555	8.55707e-07	2.75635e-05	Pttg1	ENSMUSG00000020415	Pttg1	ENSMUSG00000020415:Pttg1.1	0.285003	chr11	43425463	43426463
ENSMUSG00000034394	1.63614	1.13484	1.80271e-06	5.46408e-05	Lif	ENSMUSG00000034394	Lif	ENSMUSG00000034394:Lif.1	0.291168	chr11	4266274	4267274
ENSMUSG00000020806	1.91347	-0.500015	0.000121424	0.00255292	Rhbdf2	ENSMUSG00000020806	Rhbdf2	ENSMUSG00000020806:Rhbdf2.1	0.2917	chr11	116623700	116624700
ENSMUSG00000020806	1.91347	-0.500015	0.000121424	0.00255292	Rhbdf2	ENSMUSG00000020806	Rhbdf2	ENSMUSG00000020806:Rhbdf2.2	0.297436	chr11	116623747	116624747
ENSMUSG00000052563	1.60699	-1.42306	0.00723561	0.0883347	D930048N14Rik	ENSMUSG00000052563	D930048N14Rik	ENSMUSG00000052563:D930048N14Rik	0.29863	chr11	51650433	51651433
ENSMUSG00000041920	0.83078	3.87489	1.10964e-08	4.79389e-07	Slc16a6	ENSMUSG00000041920	Slc16a6	ENSMUSG00000041920:Slc16a6.4	0.303247	chr11	109473098	109474098
ENSMUSG00000034773	0.691118	2.95407	0.000377445	0.0070793	Hrob	ENSMUSG00000034773	BC030867	ENSMUSG00000034773:Hrob	0.31055	chr11	102248360	102249360
ENSMUSG00000001507	0.930548	2.47463	6.49891e-05	0.00145329	Itga3	ENSMUSG00000001507	Itga3	ENSMUSG00000001507:Itga3.3	0.311108	chr11	95076214	95077214
ENSMUSG00000040350	0.993105	1.39374	0.00142477	0.0225418	Trim7	ENSMUSG00000040350	Trim7	ENSMUSG00000040350:Trim7.3	0.311648	chr11	48838282	48839282
ENSMUSG00000041920	0.83078	3.87489	1.10964e-08	4.79389e-07	Slc16a6	ENSMUSG00000041920	Slc16a6	ENSMUSG00000041920:Slc16a6.2	0.312401	chr11	109472699	109473699
ENSMUSG00000041920	0.83078	3.87489	1.10964e-08	4.79389e-07	Slc16a6	ENSMUSG00000041920	Slc16a6	ENSMUSG00000041920:Slc16a6.3	0.3155	chr11	109472794	109473794
ENSMUSG00000041920	0.83078	3.87489	1.10964e-08	4.79389e-07	Slc16a6	ENSMUSG00000041920	Slc16a6	ENSMUSG00000041920:Slc16a6.1	0.320715	chr11	109472188	109473188
ENSMUSG00000034394	1.63614	1.13484	1.80271e-06	5.46408e-05	Lif	ENSMUSG00000034394	Lif	ENSMUSG00000034394:Lif.2	0.322909	chr11	4266573	4267573
ENSMUSG00000020897	0.605496	5.07094	2.06531e-08	8.45132e-07	Aurkb	ENSMUSG00000020897	Aurkb	ENSMUSG00000020897:Aurkb	0.324631	chr11	69045146	69046146
ENSMUSG00000034614	2.06542	5.09965	6.32502e-80	1.99382e-77	Pik3ip1	ENSMUSG00000034614	Pik3ip1	ENSMUSG00000034614:Pik3ip1.1	0.325732	chr11	3330206	3331206
ENSMUSG00000051378	0.565563	5.80621	4.89722e-09	2.23618e-07	Kif18b	ENSMUSG00000051378	Kif18b	ENSMUSG00000051378:Kif18b.1	0.335506	chr11	102924624	102925624
ENSMUSG00000051378	0.565563	5.80621	4.89722e-09	2.23618e-07	Kif18b	ENSMUSG00000051378	Kif18b	ENSMUSG00000051378:Kif18b	0.336785	chr11	102924588	102925588
ENSMUSG00000043448	1.46643	-1.1924	0.0137822	0.148434	Gjc2	ENSMUSG00000043448	Gjc2	ENSMUSG00000043448:Gjc2.1	0.358244	chr11	59182713	59183713
ENSMUSG00000025574	0.677306	4.72796	1.31813e-09	6.54881e-08	Tk1	ENSMUSG00000025574	Tk1	ENSMUSG00000025574:Tk1.5	0.363019	chr11	117825592	117826592
ENSMUSG00000020464	0.69453	5.4134	1.23797e-12	8.4204e-11	Pnpt1	ENSMUSG00000020464	Pnpt1	ENSMUSG00000020464:Pnpt1	0.365753	chr11	29130224	29131224
ENSMUSG00000020707	2.26365	2.90253	5.16657e-26	7.61786e-24	Rnf135	ENSMUSG00000020707	Rnf135	ENSMUSG00000020707:Rnf135.1	0.375398	chr11	80183701	80184701
ENSMUSG00000034614	2.06542	5.09965	6.32502e-80	1.99382e-77	Pik3ip1	ENSMUSG00000034614	Pik3ip1	ENSMUSG00000034614:Pik3ip1.2	0.377999	chr11	3330275	3331275
ENSMUSG00000020707	2.26365	2.90253	5.16657e-26	7.61786e-24	Rnf135	ENSMUSG00000020707	Rnf135	ENSMUSG00000020707:Rnf135	0.378149	chr11	80183329	80184329
ENSMUSG00000000275	1.78867	5.44889	1.08372e-50	2.62089e-48	Trim25	ENSMUSG00000000275	Trim25	ENSMUSG00000000275:Trim25	0.425324	chr11	88998854	88999854
ENSMUSG00000020387	1.71585	4.3515	1.00346e-37	1.98555e-35	Jade2	ENSMUSG00000020387	Jade2	ENSMUSG00000020387:Jade2.1	0.427536	chr11	51856896	51857896
ENSMUSG00000005950	1.34401	-1.86173	0.0483823	0.381659	P2rx5	ENSMUSG00000005950	P2rx5	ENSMUSG00000005950:P2rx5.1	0.42905	chr11	73160063	73161063
ENSMUSG00000034570	0.694282	3.70595	4.57477e-05	0.0010609	Inpp5j	ENSMUSG00000034570	Inpp5j	ENSMUSG00000034570:Inpp5j.1	0.431689	chr11	3504273	3505273
ENSMUSG00000020808	0.566307	5.06778	4.77102e-07	1.6023e-05	Pimreg	ENSMUSG00000020808	Pimreg	ENSMUSG00000020808:Pimreg.2	0.439034	chr11	72042400	72043400
ENSMUSG00000034570	0.694282	3.70595	4.57477e-05	0.0010609	Inpp5j	ENSMUSG00000034570	Inpp5j	ENSMUSG00000034570:Inpp5j.2	0.445447	chr11	3504286	3505286
ENSMUSG00000020689	5.14861	5.42431	8.97796e-305	6.3133e-302	Itgb3	ENSMUSG00000020689	Itgb3	ENSMUSG00000020689:Itgb3	0.446173	chr11	104607478	104608478
ENSMUSG00000053263	2.7101	1.48906	9.47094e-16	8.12191e-14	Gm12592	ENSMUSG00000053263	Gm12592	ENSMUSG00000053263:Gm12592	0.453374	chr11	3330678	3331678
ENSMUSG00000006930	0.962323	7.07126	1.54301e-23	2.11161e-21	Hap1	ENSMUSG00000006930	Hap1	ENSMUSG00000006930:Hap1.2	0.454032	chr11	100354883	100355883
ENSMUSG00000033880	4.8526	5.57184	4.21394e-08	1.67197e-06	Lgals3bp	ENSMUSG00000033880	Lgals3bp	ENSMUSG00000033880:Lgals3bp.1	0.469591	chr11	118400538	118401538
ENSMUSG00000006930	0.962323	7.07126	1.54301e-23	2.11161e-21	Hap1	ENSMUSG00000006930	Hap1	ENSMUSG00000006930:Hap1	0.479371	chr11	100351405	100352405
ENSMUSG00000066392	0.695835	5.87112	1.43018e-13	1.05139e-11	Nrxn3	ENSMUSG00000066392	Nrxn3	ENSMUSG00000066392:Nrxn3	0.000608717	chr12	88722360	88723360
ENSMUSG00000020638	3.14627	5.62859	1.07821e-38	2.17106e-36	Cmpk2	ENSMUSG00000020638	Cmpk2	ENSMUSG00000020638:Cmpk2.1	0.0067741	chr12	26469987	26470987
ENSMUSG00000021176	0.745584	1.75403	0.00702677	0.0862458	Efcab11	ENSMUSG00000021176	Efcab11	ENSMUSG00000021176:Efcab11.5	0.0107569	chr12	99883939	99884939
ENSMUSG00000066392	0.695835	5.87112	1.43018e-13	1.05139e-11	Nrxn3	ENSMUSG00000066392	Nrxn3	ENSMUSG00000066392:Nrxn3.2	0.0112706	chr12	88722587	88723587
ENSMUSG00000066392	0.695835	5.87112	1.43018e-13	1.05139e-11	Nrxn3	ENSMUSG00000066392	Nrxn3	ENSMUSG00000066392:Nrxn3.1	0.0133594	chr12	88722464	88723464
ENSMUSG00000021176	0.745584	1.75403	0.00702677	0.0862458	Efcab11	ENSMUSG00000021176	Efcab11	ENSMUSG00000021176:Efcab11.4	0.0140516	chr12	99883912	99884912
ENSMUSG00000035105	0.570704	4.11155	4.14735e-05	0.000966685	Egln3	ENSMUSG00000035105	Egln3	ENSMUSG00000035105:Egln3	0.0145077	chr12	54203360	54204360
ENSMUSG00000063632	1.05597	8.22796	9.67944e-39	1.95765e-36	Sox11	ENSMUSG00000063632	Sox11	ENSMUSG00000063632:Sox11	0.0216103	chr12	27342074	27343074
ENSMUSG00000047534	0.56194	5.53135	1.1277e-07	4.22152e-06	Mis18bp1	ENSMUSG00000047534	Mis18bp1	ENSMUSG00000047534:Mis18bp1.4	0.0232051	chr12	65172101	65173101
ENSMUSG00000047534	0.56194	5.53135	1.1277e-07	4.22152e-06	Mis18bp1	ENSMUSG00000047534	Mis18bp1	ENSMUSG00000047534:Mis18bp1.3	0.0284563	chr12	65172079	65173079
ENSMUSG00000047534	0.56194	5.53135	1.1277e-07	4.22152e-06	Mis18bp1	ENSMUSG00000047534	Mis18bp1	ENSMUSG00000047534:Mis18bp1.2	0.0290838	chr12	65172066	65173066
ENSMUSG00000021280	2.86751	-0.809722	9.19311e-07	2.94876e-05	Exoc3l4	ENSMUSG00000021280	Exoc3l4	ENSMUSG00000021280:Exoc3l4.6	0.031654	chr12	111428732	111429732
ENSMUSG00000021266	1.46189	7.46873	4.09487e-71	1.21538e-68	Wars1	ENSMUSG00000021266	Wars	ENSMUSG00000021266:Wars.3	0.0441657	chr12	108893601	108894601
ENSMUSG00000021266	1.46189	7.46873	4.09487e-71	1.21538e-68	Wars1	ENSMUSG00000021266	Wars	ENSMUSG00000021266:Wars.4	0.0476725	chr12	108893637	108894637
ENSMUSG00000021115	0.547261	4.85851	1.70676e-07	6.19148e-06	Vrk1	ENSMUSG00000021115	Vrk1	ENSMUSG00000021115:Vrk1	0.0477496	chr12	106009750	106010750
ENSMUSG00000090812	2.14715	0.106321	2.57203e-06	7.54087e-05	Samd15	ENSMUSG00000090812	Samd15	ENSMUSG00000090812:Samd15.2	0.0483902	chr12	87200228	87201228
ENSMUSG00000021266	1.46189	7.46873	4.09487e-71	1.21538e-68	Wars1	ENSMUSG00000021266	Wars	ENSMUSG00000021266:Wars.5	0.0548479	chr12	108893674	108894674
ENSMUSG00000061533	0.767187	4.15031	5.84742e-09	2.64366e-07	Cep128	ENSMUSG00000061533	Cep128	ENSMUSG00000061533:Cep128.7	0.0573946	chr12	91383856	91384856
ENSMUSG00000036295	0.695564	6.39306	4.70337e-15	3.77161e-13	Lrrn3	ENSMUSG00000036295	Lrrn3	ENSMUSG00000036295:Lrrn3	0.0585624	chr12	41485931	41486931
ENSMUSG00000061533	0.767187	4.15031	5.84742e-09	2.64366e-07	Cep128	ENSMUSG00000061533	Cep128	ENSMUSG00000061533:Cep128.8	0.0592044	chr12	91383909	91384909
ENSMUSG00000021287	0.745869	1.70095	0.00978242	0.112515	Xrcc3	ENSMUSG00000021287	Xrcc3	ENSMUSG00000021287:Xrcc3	0.0608466	chr12	111809482	111810482
ENSMUSG00000048251	1.04836	3.09817	9.07908e-08	3.4496e-06	Bcl11b	ENSMUSG00000048251	Bcl11b	ENSMUSG00000048251:Bcl11b	0.0612993	chr12	108002914	108003914
ENSMUSG00000090812	2.14715	0.106321	2.57203e-06	7.54087e-05	Samd15	ENSMUSG00000090812	Samd15	ENSMUSG00000090812:Samd15.1	0.0672833	chr12	87200021	87201021
ENSMUSG00000072949	0.797865	4.76494	4.10114e-09	1.90503e-07	Acot1	ENSMUSG00000072949	Acot1	ENSMUSG00000072949:Acot1.1	0.0705597	chr12	84009613	84010613
ENSMUSG00000021190	0.580883	6.10409	6.51201e-09	2.92337e-07	Lgmn	ENSMUSG00000021190	Lgmn	ENSMUSG00000021190:Lgmn.2	0.0864501	chr12	102439313	102440313
ENSMUSG00000020585	0.816047	7.91325	4.89194e-24	6.8171e-22	Laptm4a	ENSMUSG00000020585	Laptm4a	ENSMUSG00000020585:Laptm4a	0.0927382	chr12	8921142	8922142
ENSMUSG00000041992	1.00906	2.60363	5.58085e-06	0.000153668	Rapgef5	ENSMUSG00000041992	Rapgef5	ENSMUSG00000041992:Rapgef5.5	0.103517	chr12	117688434	117689434
ENSMUSG00000042350	1.09143	7.39344	9.48461e-42	2.01638e-39	Arel1	ENSMUSG00000042350	Arel1	ENSMUSG00000042350:Arel1.4	0.110743	chr12	84970324	84971324
ENSMUSG00000020952	0.581055	5.72042	6.42152e-10	3.3203e-08	Scfd1	ENSMUSG00000020952	Scfd1	ENSMUSG00000020952:Scfd1.1	0.112683	chr12	51377064	51378064
ENSMUSG00000020952	0.581055	5.72042	6.42152e-10	3.3203e-08	Scfd1	ENSMUSG00000020952	Scfd1	ENSMUSG00000020952:Scfd1	0.120836	chr12	51376988	51377988
ENSMUSG00000021176	0.745584	1.75403	0.00702677	0.0862458	Efcab11	ENSMUSG00000021176	Efcab11	ENSMUSG00000021176:Efcab11.3	0.12411	chr12	99883003	99884003
ENSMUSG00000020572	1.81443	6.8751	7.52502e-96	2.6458e-93	Nampt	ENSMUSG00000020572	Nampt	ENSMUSG00000020572:Nampt.2	0.124307	chr12	32820279	32821279
ENSMUSG00000042350	1.09143	7.39344	9.48461e-42	2.01638e-39	Arel1	ENSMUSG00000042350	Arel1	ENSMUSG00000042350:Arel1.5	0.124647	chr12	84970338	84971338
ENSMUSG00000051235	0.880725	3.77294	4.37153e-08	1.72551e-06	Gen1	ENSMUSG00000051235	Gen1	ENSMUSG00000051235:Gen1.2	0.133423	chr12	11265292	11266292
ENSMUSG00000051235	0.880725	3.77294	4.37153e-08	1.72551e-06	Gen1	ENSMUSG00000051235	Gen1	ENSMUSG00000051235:Gen1.1	0.135902	chr12	11265266	11266266
ENSMUSG00000042350	1.09143	7.39344	9.48461e-42	2.01638e-39	Arel1	ENSMUSG00000042350	Arel1	ENSMUSG00000042350:Arel1.6	0.136105	chr12	84970356	84971356
ENSMUSG00000048251	1.04836	3.09817	9.07908e-08	3.4496e-06	Bcl11b	ENSMUSG00000048251	Bcl11b	ENSMUSG00000048251:Bcl11b.1	0.136801	chr12	108003102	108004102
ENSMUSG00000042029	0.52215	6.15146	3.73991e-09	1.75507e-07	Ncapg2	ENSMUSG00000042029	Ncapg2	ENSMUSG00000042029:Ncapg2	0.138418	chr12	116404896	116405896
ENSMUSG00000066392	0.695835	5.87112	1.43018e-13	1.05139e-11	Nrxn3	ENSMUSG00000066392	Nrxn3	ENSMUSG00000066392:Nrxn3.10	0.146965	chr12	89811961	89812961
ENSMUSG00000021287	0.745869	1.70095	0.00978242	0.112515	Xrcc3	ENSMUSG00000021287	Xrcc3	ENSMUSG00000021287:Xrcc3.4	0.147474	chr12	111813352	111814352
ENSMUSG00000041992	1.00906	2.60363	5.58085e-06	0.000153668	Rapgef5	ENSMUSG00000041992	Rapgef5	ENSMUSG00000041992:Rapgef5.4	0.147624	chr12	117688314	117689314
ENSMUSG00000021287	0.745869	1.70095	0.00978242	0.112515	Xrcc3	ENSMUSG00000021287	Xrcc3	ENSMUSG00000021287:Xrcc3.3	0.147868	chr12	111813341	111814341
ENSMUSG00000021287	0.745869	1.70095	0.00978242	0.112515	Xrcc3	ENSMUSG00000021287	Xrcc3	ENSMUSG00000021287:Xrcc3.5	0.148454	chr12	111813373	111814373
ENSMUSG00000020592	0.702116	4.09562	2.59912e-07	9.06982e-06	Sdc1	ENSMUSG00000020592	Sdc1	ENSMUSG00000020592:Sdc1.3	0.151642	chr12	8771281	8772281
ENSMUSG00000021176	0.745584	1.75403	0.00702677	0.0862458	Efcab11	ENSMUSG00000021176	Efcab11	ENSMUSG00000021176:Efcab11.2	0.152006	chr12	99882942	99883942
ENSMUSG00000072949	0.797865	4.76494	4.10114e-09	1.90503e-07	Acot1	ENSMUSG00000072949	Acot1	ENSMUSG00000072949:Acot1	0.153311	chr12	84008968	84009968
ENSMUSG00000042350	1.09143	7.39344	9.48461e-42	2.01638e-39	Arel1	ENSMUSG00000042350	Arel1	ENSMUSG00000042350:Arel1.7	0.154455	chr12	84970400	84971400
ENSMUSG00000066392	0.695835	5.87112	1.43018e-13	1.05139e-11	Nrxn3	ENSMUSG00000066392	Nrxn3	ENSMUSG00000066392:Nrxn3.9	0.160446	chr12	89811886	89812886
ENSMUSG00000021176	0.745584	1.75403	0.00702677	0.0862458	Efcab11	ENSMUSG00000021176	Efcab11	ENSMUSG00000021176:Efcab11.1	0.163018	chr12	99882922	99883922
ENSMUSG00000063450	0.979637	6.79049	2.55844e-19	2.82466e-17	Syne2	ENSMUSG00000063450	Syne2	ENSMUSG00000063450:Syne2.1	0.163776	chr12	75817812	75818812
ENSMUSG00000063450	0.979637	6.79049	2.55844e-19	2.82466e-17	Syne2	ENSMUSG00000063450	Syne2	ENSMUSG00000063450:Syne2	0.173476	chr12	75817612	75818612
ENSMUSG00000071379	0.704362	3.85607	1.83401e-06	5.54791e-05	Hpcal1	ENSMUSG00000071379	Hpcal1	ENSMUSG00000071379:Hpcal1	0.176583	chr12	17690334	17691334
ENSMUSG00000020572	1.81443	6.8751	7.52502e-96	2.6458e-93	Nampt	ENSMUSG00000020572	Nampt	ENSMUSG00000020572:Nampt	0.178858	chr12	32819023	32820023
ENSMUSG00000020592	0.702116	4.09562	2.59912e-07	9.06982e-06	Sdc1	ENSMUSG00000020592	Sdc1	ENSMUSG00000020592:Sdc1.2	0.181945	chr12	8771220	8772220
ENSMUSG00000040856	2.45128	2.64411	2.99812e-26	4.47837e-24	Dlk1	ENSMUSG00000040856	Dlk1	ENSMUSG00000040856:Dlk1	0.209925	chr12	109452314	109453314
ENSMUSG00000046157	0.635181	6.23296	7.36233e-12	4.67385e-10	Tmem229b	ENSMUSG00000046157	Tmem229b	ENSMUSG00000046157:Tmem229b.6	0.217877	chr12	79007127	79008127
ENSMUSG00000020572	1.81443	6.8751	7.52502e-96	2.6458e-93	Nampt	ENSMUSG00000020572	Nampt	ENSMUSG00000020572:Nampt.1	0.223472	chr12	32819813	32820813
ENSMUSG00000019256	0.952354	1.81426	0.000605191	0.0106927	Ahr	ENSMUSG00000019256	Ahr	ENSMUSG00000019256:Ahr.1	0.237716	chr12	35534123	35535123
ENSMUSG00000041992	1.00906	2.60363	5.58085e-06	0.000153668	Rapgef5	ENSMUSG00000041992	Rapgef5	ENSMUSG00000041992:Rapgef5.1	0.249115	chr12	117533366	117534366
ENSMUSG00000090812	2.14715	0.106321	2.57203e-06	7.54087e-05	Samd15	ENSMUSG00000090812	Samd15	ENSMUSG00000090812:Samd15	0.263226	chr12	87199223	87200223
ENSMUSG00000019256	0.952354	1.81426	0.000605191	0.0106927	Ahr	ENSMUSG00000019256	Ahr	ENSMUSG00000019256:Ahr.2	0.264362	chr12	35534538	35535538
ENSMUSG00000021091	3.39847	5.95754	8.46523e-168	4.29921e-165	Serpina3n	ENSMUSG00000021091	Serpina3n	ENSMUSG00000021091:Serpina3n	0.271413	chr12	104406207	104407207
ENSMUSG00000020592	0.702116	4.09562	2.59912e-07	9.06982e-06	Sdc1	ENSMUSG00000020592	Sdc1	ENSMUSG00000020592:Sdc1.1	0.27577	chr12	8770891	8771891
ENSMUSG00000020592	0.702116	4.09562	2.59912e-07	9.06982e-06	Sdc1	ENSMUSG00000020592	Sdc1	ENSMUSG00000020592:Sdc1	0.291643	chr12	8770801	8771801
ENSMUSG00000040856	2.45128	2.64411	2.99812e-26	4.47837e-24	Dlk1	ENSMUSG00000040856	Dlk1	ENSMUSG00000040856:Dlk1.1	0.293463	chr12	109452973	109453973
ENSMUSG00000050671	1.06481	0.544918	0.00689711	0.0848139	Ism2	ENSMUSG00000050671	Ism2	ENSMUSG00000050671:Ism2.2	0.303073	chr12	87299205	87300205
ENSMUSG00000063450	0.979637	6.79049	2.55844e-19	2.82466e-17	Syne2	ENSMUSG00000063450	Syne2	ENSMUSG00000063450:Syne2.10	0.312719	chr12	76081417	76082417
ENSMUSG00000096940	2.01578	-2.59968	0.026327	0.246286	Gm4755	ENSMUSG00000096940	Gm4755	ENSMUSG00000096940:Gm4755	0.321267	chr12	8770681	8771681
ENSMUSG00000040856	2.45128	2.64411	2.99812e-26	4.47837e-24	Dlk1	ENSMUSG00000040856	Dlk1	ENSMUSG00000040856:Dlk1.2	0.324538	chr12	109453135	109454135
ENSMUSG00000063450	0.979637	6.79049	2.55844e-19	2.82466e-17	Syne2	ENSMUSG00000063450	Syne2	ENSMUSG00000063450:Syne2.9	0.339724	chr12	76081134	76082134
ENSMUSG00000046157	0.635181	6.23296	7.36233e-12	4.67385e-10	Tmem229b	ENSMUSG00000046157	Tmem229b	ENSMUSG00000046157:Tmem229b.5	0.402327	chr12	79006840	79007840
ENSMUSG00000091553	4.37036	-1.13873	8.28831e-09	3.64973e-07	Serpina3e-ps	ENSMUSG00000091553	Serpina3e-ps	ENSMUSG00000091553:Serpina3e-ps	0.419187	chr12	104192426	104193426
ENSMUSG00000021175	0.578042	3.73397	0.000176476	0.00358345	Cdca7l	ENSMUSG00000021175	Cdca7l	ENSMUSG00000021175:Cdca7l.1	0.444527	chr12	117842993	117843993
ENSMUSG00000021175	0.578042	3.73397	0.000176476	0.00358345	Cdca7l	ENSMUSG00000021175	Cdca7l	ENSMUSG00000021175:Cdca7l.2	0.45109	chr12	117843364	117844364
ENSMUSG00000045273	0.885526	2.72012	2.72803e-05	0.000659402	Cenph	ENSMUSG00000045273	Cenph	ENSMUSG00000045273:Cenph	0.00106761	chr13	100775283	100776283
ENSMUSG00000045273	0.885526	2.72012	2.72803e-05	0.000659402	Cenph	ENSMUSG00000045273	Cenph	ENSMUSG00000045273:Cenph.1	0.00137988	chr13	100775399	100776399
ENSMUSG00000021418	0.607713	1.82532	0.0254653	0.240043	Rpp40	ENSMUSG00000021418	Rpp40	ENSMUSG00000021418:Rpp40.1	0.00684761	chr13	35905828	35906828
ENSMUSG00000021418	0.607713	1.82532	0.0254653	0.240043	Rpp40	ENSMUSG00000021418	Rpp40	ENSMUSG00000021418:Rpp40.2	0.00689378	chr13	35905844	35906844
ENSMUSG00000021418	0.607713	1.82532	0.0254653	0.240043	Rpp40	ENSMUSG00000021418	Rpp40	ENSMUSG00000021418:Rpp40.3	0.00940341	chr13	35905859	35906859
ENSMUSG00000062248	0.517034	4.414	7.6734e-05	0.00169029	Cks2	ENSMUSG00000062248	Cks2	ENSMUSG00000062248:Cks2	0.011919	chr13	51644710	51645710
ENSMUSG00000054728	1.61531	5.96882	5.18084e-68	1.52778e-65	Phactr1	ENSMUSG00000054728	Phactr1	ENSMUSG00000054728:Phactr1.7	0.0128377	chr13	42916129	42917129
ENSMUSG00000021338	1.94014	6.61655	8.59787e-104	3.14393e-101	Carmil1	ENSMUSG00000021338	Carmil1	ENSMUSG00000021338:Carmil1.9	0.018562	chr13	24280216	24281216
ENSMUSG00000021453	1.36246	2.47611	4.30199e-09	1.98621e-07	Gadd45g	ENSMUSG00000021453	Gadd45g	ENSMUSG00000021453:Gadd45g	0.0186922	chr13	51846156	51847156
ENSMUSG00000100210	0.674281	6.61098	1.1914e-15	1.01032e-13	H3c7	ENSMUSG00000100210	Hist1h3f	ENSMUSG00000100210:H3c7	0.0192039	chr13	23543530	23544530
ENSMUSG00000049539	0.591985	6.07165	6.17734e-09	2.78455e-07	H1f1	ENSMUSG00000049539	Hist1h1a	ENSMUSG00000049539:H1f1	0.0218203	chr13	23763144	23764144
ENSMUSG00000057554	0.945769	5.10364	5.46608e-09	2.48107e-07	Lgals8	ENSMUSG00000057554	Lgals8	ENSMUSG00000057554:Lgals8.5	0.0366648	chr13	12461238	12462238
ENSMUSG00000046159	0.767336	0.748706	0.0464815	0.37143	Chrm3	ENSMUSG00000046159	Chrm3	ENSMUSG00000046159:Chrm3.1	0.0397462	chr13	10360346	10361346
ENSMUSG00000021608	0.519627	7.63724	2.51575e-10	1.36082e-08	Lpcat1	ENSMUSG00000021608	Lpcat1	ENSMUSG00000021608:Lpcat1.5	0.0432234	chr13	73512881	73513881
ENSMUSG00000021714	0.638557	2.79085	0.00203402	0.0305524	Cenpk	ENSMUSG00000021714	Cenpk	ENSMUSG00000021714:Cenpk	0.0445933	chr13	104228089	104229089
ENSMUSG00000021453	1.36246	2.47611	4.30199e-09	1.98621e-07	Gadd45g	ENSMUSG00000021453	Gadd45g	ENSMUSG00000021453:Gadd45g.1	0.0462606	chr13	51846222	51847222
ENSMUSG00000021376	0.60935	3.06629	0.00106559	0.017577	Tpmt	ENSMUSG00000021376	Tpmt	ENSMUSG00000021376:Tpmt.6	0.0468848	chr13	47044237	47045237
ENSMUSG00000021765	2.32757	-1.31585	0.000198964	0.00398269	Fst	ENSMUSG00000021765	Fst	ENSMUSG00000021765:Fst.3	0.0509106	chr13	114458086	114459086
ENSMUSG00000021196	1.25542	5.45938	3.85617e-38	7.66337e-36	Pfkp	ENSMUSG00000021196	Pfkp	ENSMUSG00000021196:Pfkp.9	0.0545982	chr13	6648277	6649277
ENSMUSG00000078994	1.14042	2.34931	1.06079e-06	3.36945e-05	Zfp429	ENSMUSG00000078994	Zfp429	ENSMUSG00000078994:Zfp429.1	0.0570867	chr13	67399267	67400267
ENSMUSG00000046159	0.767336	0.748706	0.0464815	0.37143	Chrm3	ENSMUSG00000046159	Chrm3	ENSMUSG00000046159:Chrm3	0.0571926	chr13	10360063	10361063
ENSMUSG00000078994	1.14042	2.34931	1.06079e-06	3.36945e-05	Zfp429	ENSMUSG00000078994	Zfp429	ENSMUSG00000078994:Zfp429.2	0.0580509	chr13	67399319	67400319
ENSMUSG00000078994	1.14042	2.34931	1.06079e-06	3.36945e-05	Zfp429	ENSMUSG00000078994	Zfp429	ENSMUSG00000078994:Zfp429	0.0594564	chr13	67399247	67400247
ENSMUSG00000017756	3.80819	5.36603	2.37138e-232	1.4262e-229	Slc12a7	ENSMUSG00000017756	Slc12a7	ENSMUSG00000017756:Slc12a7.1	0.0609759	chr13	73763196	73764196
ENSMUSG00000021714	0.638557	2.79085	0.00203402	0.0305524	Cenpk	ENSMUSG00000021714	Cenpk	ENSMUSG00000021714:Cenpk.1	0.0614659	chr13	104228443	104229443
ENSMUSG00000021196	1.25542	5.45938	3.85617e-38	7.66337e-36	Pfkp	ENSMUSG00000021196	Pfkp	ENSMUSG00000021196:Pfkp.8	0.0616034	chr13	6648225	6649225
ENSMUSG00000069268	0.501799	5.35871	3.8163e-07	1.29788e-05	H2bc7	ENSMUSG00000069268	Hist1h2bf	ENSMUSG00000069268:H2bc7	0.0622045	chr13	23573696	23574696
ENSMUSG00000021765	2.32757	-1.31585	0.000198964	0.00398269	Fst	ENSMUSG00000021765	Fst	ENSMUSG00000021765:Fst.4	0.0640459	chr13	114458450	114459450
ENSMUSG00000042655	4.88632	-3.27818	0.00284222	0.0402856	Shisal2b	ENSMUSG00000042655	Shisal2b	ENSMUSG00000042655:Shisal2b.1	0.0640781	chr13	104862919	104863919
ENSMUSG00000021338	1.94014	6.61655	8.59787e-104	3.14393e-101	Carmil1	ENSMUSG00000021338	Carmil1	ENSMUSG00000021338:Carmil1.10	0.0689128	chr13	24280293	24281293
ENSMUSG00000021714	0.638557	2.79085	0.00203402	0.0305524	Cenpk	ENSMUSG00000021714	Cenpk	ENSMUSG00000021714:Cenpk.2	0.0694943	chr13	104228866	104229866
ENSMUSG00000071451	0.936237	3.40222	3.74052e-07	1.27829e-05	Psmg4	ENSMUSG00000071451	Psmg4	ENSMUSG00000071451:Psmg4	0.0703935	chr13	34162442	34163442
ENSMUSG00000057554	0.945769	5.10364	5.46608e-09	2.48107e-07	Lgals8	ENSMUSG00000057554	Lgals8	ENSMUSG00000057554:Lgals8.4	0.0717595	chr13	12461000	12462000
ENSMUSG00000097806	2.82605	0.196066	2.44467e-09	1.17622e-07	Gm6556	ENSMUSG00000097806	Gm6556	ENSMUSG00000097806:Gm6556.1	0.0744655	chr13	15463236	15464236
ENSMUSG00000006711	2.74648	-0.319198	1.77793e-07	6.42418e-06	D130043K22Rik	ENSMUSG00000006711	D130043K22Rik	ENSMUSG00000006711:D130043K22Rik	0.0799973	chr13	24844613	24845613
ENSMUSG00000021408	0.991973	4.66837	1.10755e-18	1.15844e-16	Ripk1	ENSMUSG00000021408	Ripk1	ENSMUSG00000021408:Ripk1	0.0846049	chr13	34001859	34002859
ENSMUSG00000041773	0.724325	8.58674	3.75616e-07	1.2822e-05	Enc1	ENSMUSG00000041773	Enc1	ENSMUSG00000041773:Enc1	0.0855925	chr13	97240583	97241583
ENSMUSG00000021338	1.94014	6.61655	8.59787e-104	3.14393e-101	Carmil1	ENSMUSG00000021338	Carmil1	ENSMUSG00000021338:Carmil1.8	0.0861824	chr13	24279986	24280986
ENSMUSG00000042655	4.88632	-3.27818	0.00284222	0.0402856	Shisal2b	ENSMUSG00000042655	Shisal2b	ENSMUSG00000042655:Shisal2b	0.0958199	chr13	104862812	104863812
ENSMUSG00000042655	4.88632	-3.27818	0.00284222	0.0402856	Shisal2b	ENSMUSG00000042655	Shisal2b	ENSMUSG00000042655:Shisal2b.2	0.106513	chr13	104863393	104864393
ENSMUSG00000021597	0.57877	4.01504	2.84128e-05	0.000685327	Slf1	ENSMUSG00000021597	Slf1	ENSMUSG00000021597:Slf1.3	0.111508	chr13	77134967	77135967
ENSMUSG00000054728	1.61531	5.96882	5.18084e-68	1.52778e-65	Phactr1	ENSMUSG00000054728	Phactr1	ENSMUSG00000054728:Phactr1.6	0.119755	chr13	42866312	42867312
ENSMUSG00000021597	0.57877	4.01504	2.84128e-05	0.000685327	Slf1	ENSMUSG00000021597	Slf1	ENSMUSG00000021597:Slf1.2	0.119947	chr13	77134938	77135938
ENSMUSG00000021608	0.519627	7.63724	2.51575e-10	1.36082e-08	Lpcat1	ENSMUSG00000021608	Lpcat1	ENSMUSG00000021608:Lpcat1	0.121036	chr13	73466692	73467692
ENSMUSG00000089827	1.73724	-2.32544	0.0326959	0.288929	1700023H06Rik	ENSMUSG00000089827	1700023H06Rik	ENSMUSG00000089827:1700023H06Rik	0.124458	chr13	80885024	80886024
ENSMUSG00000056257	2.88887	-2.72497	0.00579231	0.0734003	Gm5447	ENSMUSG00000056257	Gm5447	ENSMUSG00000056257:Gm5447	0.133779	chr13	30973662	30974662
ENSMUSG00000035248	1.2443	6.82908	1.69771e-47	3.93902e-45	Tut7	ENSMUSG00000035248	Tut7	ENSMUSG00000035248:Tut7.6	0.147569	chr13	59822088	59823088
ENSMUSG00000021408	0.991973	4.66837	1.10755e-18	1.15844e-16	Ripk1	ENSMUSG00000021408	Ripk1	ENSMUSG00000021408:Ripk1.1	0.155767	chr13	34002352	34003352
ENSMUSG00000085024	1.95686	1.43776	1.07389e-09	5.41183e-08	C230035I16Rik	ENSMUSG00000085024	C230035I16Rik	ENSMUSG00000085024:C230035I16Rik	0.156167	chr13	23430326	23431326
ENSMUSG00000021608	0.519627	7.63724	2.51575e-10	1.36082e-08	Lpcat1	ENSMUSG00000021608	Lpcat1	ENSMUSG00000021608:Lpcat1.1	0.157293	chr13	73466901	73467901
ENSMUSG00000021697	0.651308	4.18577	4.26464e-06	0.000119956	Depdc1b	ENSMUSG00000021697	Depdc1b	ENSMUSG00000021697:Depdc1b	0.159244	chr13	108315855	108316855
ENSMUSG00000053216	2.18578	-1.04138	0.000110461	0.00234398	Btn2a2	ENSMUSG00000053216	Btn2a2	ENSMUSG00000053216:Btn2a2	0.161489	chr13	23488344	23489344
ENSMUSG00000057554	0.945769	5.10364	5.46608e-09	2.48107e-07	Lgals8	ENSMUSG00000057554	Lgals8	ENSMUSG00000057554:Lgals8.3	0.173335	chr13	12460547	12461547
ENSMUSG00000085024	1.95686	1.43776	1.07389e-09	5.41183e-08	C230035I16Rik	ENSMUSG00000085024	C230035I16Rik	ENSMUSG00000085024:C230035I16Rik.1	0.177302	chr13	23430522	23431522
ENSMUSG00000021638	1.21235	-1.47858	0.0467967	0.373231	Ocln	ENSMUSG00000021638	Ocln	ENSMUSG00000021638:Ocln	0.178452	chr13	100551960	100552960
ENSMUSG00000021391	0.745503	2.27296	0.00196129	0.0296059	Cenpp	ENSMUSG00000021391	Cenpp	ENSMUSG00000021391:Cenpp	0.179047	chr13	49652267	49653267
ENSMUSG00000021559	0.800716	4.36896	7.69302e-11	4.5139e-09	Dapk1	ENSMUSG00000021559	Dapk1	ENSMUSG00000021559:Dapk1	0.179483	chr13	60601430	60602430
ENSMUSG00000021391	0.745503	2.27296	0.00196129	0.0296059	Cenpp	ENSMUSG00000021391	Cenpp	ENSMUSG00000021391:Cenpp.1	0.182469	chr13	49652285	49653285
ENSMUSG00000069302	0.610908	4.12806	1.65038e-05	0.000415165	H2ac12	ENSMUSG00000069302	Hist1h2ah	ENSMUSG00000069302:H2ac12	0.182895	chr13	22035068	22036068
ENSMUSG00000035248	1.2443	6.82908	1.69771e-47	3.93902e-45	Tut7	ENSMUSG00000035248	Tut7	ENSMUSG00000035248:Tut7.9	0.186032	chr13	59822647	59823647
ENSMUSG00000035248	1.2443	6.82908	1.69771e-47	3.93902e-45	Tut7	ENSMUSG00000035248	Tut7	ENSMUSG00000035248:Tut7.8	0.18723	chr13	59822633	59823633
ENSMUSG00000021376	0.60935	3.06629	0.00106559	0.017577	Tpmt	ENSMUSG00000021376	Tpmt	ENSMUSG00000021376:Tpmt.5	0.188141	chr13	47042843	47043843
ENSMUSG00000101355	0.520757	5.62018	5.43696e-08	2.1295e-06	H3c10	ENSMUSG00000101355	Hist1h3h	ENSMUSG00000101355:H3c10	0.18882	chr13	21717137	21718137
ENSMUSG00000021638	1.21235	-1.47858	0.0467967	0.373231	Ocln	ENSMUSG00000021638	Ocln	ENSMUSG00000021638:Ocln.1	0.190146	chr13	100551981	100552981
ENSMUSG00000021376	0.60935	3.06629	0.00106559	0.017577	Tpmt	ENSMUSG00000021376	Tpmt	ENSMUSG00000021376:Tpmt.3	0.19064	chr13	47042641	47043641
ENSMUSG00000035248	1.2443	6.82908	1.69771e-47	3.93902e-45	Tut7	ENSMUSG00000035248	Tut7	ENSMUSG00000035248:Tut7.7	0.191745	chr13	59822614	59823614
ENSMUSG00000021376	0.60935	3.06629	0.00106559	0.017577	Tpmt	ENSMUSG00000021376	Tpmt	ENSMUSG00000021376:Tpmt.2	0.191988	chr13	47042624	47043624
ENSMUSG00000021376	0.60935	3.06629	0.00106559	0.017577	Tpmt	ENSMUSG00000021376	Tpmt	ENSMUSG00000021376:Tpmt.4	0.193263	chr13	47042710	47043710
ENSMUSG00000050002	2.37676	4.80707	7.40509e-86	2.43505e-83	Idnk	ENSMUSG00000050002	Idnk	ENSMUSG00000050002:Idnk	0.194068	chr13	58157144	58158144
ENSMUSG00000021638	1.21235	-1.47858	0.0467967	0.373231	Ocln	ENSMUSG00000021638	Ocln	ENSMUSG00000021638:Ocln.2	0.194573	chr13	100551998	100552998
ENSMUSG00000055137	1.0985	-1.0618	0.0427823	0.348884	Sugct	ENSMUSG00000055137	Sugct	ENSMUSG00000055137:Sugct.2	0.198789	chr13	17695053	17696053
ENSMUSG00000054728	1.61531	5.96882	5.18084e-68	1.52778e-65	Phactr1	ENSMUSG00000054728	Phactr1	ENSMUSG00000054728:Phactr1.9	0.20447	chr13	43122342	43123342
ENSMUSG00000021559	0.800716	4.36896	7.69302e-11	4.5139e-09	Dapk1	ENSMUSG00000021559	Dapk1	ENSMUSG00000021559:Dapk1.1	0.210219	chr13	60601532	60602532
ENSMUSG00000046169	1.40444	3.14362	8.18729e-08	3.12114e-06	Adamts6	ENSMUSG00000046169	Adamts6	ENSMUSG00000046169:Adamts6.1	0.215614	chr13	104287453	104288453
ENSMUSG00000055137	1.0985	-1.0618	0.0427823	0.348884	Sugct	ENSMUSG00000055137	Sugct	ENSMUSG00000055137:Sugct.1	0.217088	chr13	17694269	17695269
ENSMUSG00000055137	1.0985	-1.0618	0.0427823	0.348884	Sugct	ENSMUSG00000055137	Sugct	ENSMUSG00000055137:Sugct	0.218349	chr13	17694238	17695238
ENSMUSG00000058900	0.859937	2.49871	0.000199012	0.00398269	Rsl1	ENSMUSG00000058900	Rsl1	ENSMUSG00000058900:Rsl1	0.22648	chr13	67172668	67173668
ENSMUSG00000021559	0.800716	4.36896	7.69302e-11	4.5139e-09	Dapk1	ENSMUSG00000021559	Dapk1	ENSMUSG00000021559:Dapk1.2	0.236553	chr13	60601699	60602699
ENSMUSG00000046169	1.40444	3.14362	8.18729e-08	3.12114e-06	Adamts6	ENSMUSG00000046169	Adamts6	ENSMUSG00000046169:Adamts6	0.23907	chr13	104287332	104288332
ENSMUSG00000021638	1.21235	-1.47858	0.0467967	0.373231	Ocln	ENSMUSG00000021638	Ocln	ENSMUSG00000021638:Ocln.4	0.254479	chr13	100552218	100553218
ENSMUSG00000006715	0.569443	3.19345	0.00195126	0.029474	Gmnn	ENSMUSG00000006715	Gmnn	ENSMUSG00000006715:Gmnn	0.261118	chr13	24760940	24761940
ENSMUSG00000021638	1.21235	-1.47858	0.0467967	0.373231	Ocln	ENSMUSG00000021638	Ocln	ENSMUSG00000021638:Ocln.3	0.261301	chr13	100552123	100553123
ENSMUSG00000006715	0.569443	3.19345	0.00195126	0.029474	Gmnn	ENSMUSG00000006715	Gmnn	ENSMUSG00000006715:Gmnn.4	0.273243	chr13	24761423	24762423
ENSMUSG00000037816	0.625504	3.60909	9.58638e-05	0.00206491	Fbxw17	ENSMUSG00000037816	Fbxw17	ENSMUSG00000037816:Fbxw17	0.274124	chr13	50417357	50418357
ENSMUSG00000006715	0.569443	3.19345	0.00195126	0.029474	Gmnn	ENSMUSG00000006715	Gmnn	ENSMUSG00000006715:Gmnn.1	0.275341	chr13	24760976	24761976
ENSMUSG00000006715	0.569443	3.19345	0.00195126	0.029474	Gmnn	ENSMUSG00000006715	Gmnn	ENSMUSG00000006715:Gmnn.3	0.27897	chr13	24761397	24762397
ENSMUSG00000006715	0.569443	3.19345	0.00195126	0.029474	Gmnn	ENSMUSG00000006715	Gmnn	ENSMUSG00000006715:Gmnn.2	0.286568	chr13	24761361	24762361
ENSMUSG00000021583	3.54289	6.77824	6.73435e-278	4.39734e-275	Erap1	ENSMUSG00000021583	Erap1	ENSMUSG00000021583:Erap1.1	0.30396	chr13	74639341	74640341
ENSMUSG00000021485	0.789947	3.64412	5.48181e-07	1.83026e-05	Mxd3	ENSMUSG00000021485	Mxd3	ENSMUSG00000021485:Mxd3	0.313723	chr13	55328852	55329852
ENSMUSG00000021485	0.789947	3.64412	5.48181e-07	1.83026e-05	Mxd3	ENSMUSG00000021485	Mxd3	ENSMUSG00000021485:Mxd3.1	0.33378	chr13	55329233	55330233
ENSMUSG00000021485	0.789947	3.64412	5.48181e-07	1.83026e-05	Mxd3	ENSMUSG00000021485	Mxd3	ENSMUSG00000021485:Mxd3.2	0.33457	chr13	55329258	55330258
ENSMUSG00000021569	0.703138	3.45189	2.64192e-05	0.000640281	Trip13	ENSMUSG00000021569	Trip13	ENSMUSG00000021569:Trip13.2	0.339395	chr13	73937284	73938284
ENSMUSG00000021585	0.730944	1.21587	0.0282858	0.258681	Cast	ENSMUSG00000021585	Cast	ENSMUSG00000021585:Cast.6	0.341943	chr13	74770090	74771090
ENSMUSG00000021585	0.730944	1.21587	0.0282858	0.258681	Cast	ENSMUSG00000021585	Cast	ENSMUSG00000021585:Cast.7	0.344806	chr13	74770149	74771149
ENSMUSG00000021485	0.789947	3.64412	5.48181e-07	1.83026e-05	Mxd3	ENSMUSG00000021485	Mxd3	ENSMUSG00000021485:Mxd3.3	0.34841	chr13	55329323	55330323
ENSMUSG00000021585	0.730944	1.21587	0.0282858	0.258681	Cast	ENSMUSG00000021585	Cast	ENSMUSG00000021585:Cast.8	0.363857	chr13	74770236	74771236
ENSMUSG00000021360	1.22819	-1.04478	0.0248976	0.235566	Gcnt2	ENSMUSG00000021360	Gcnt2	ENSMUSG00000021360:Gcnt2.2	0.370495	chr13	40917103	40918103
ENSMUSG00000021583	3.54289	6.77824	6.73435e-278	4.39734e-275	Erap1	ENSMUSG00000021583	Erap1	ENSMUSG00000021583:Erap1	0.382483	chr13	74639046	74640046
ENSMUSG00000054728	1.61531	5.96882	5.18084e-68	1.52778e-65	Phactr1	ENSMUSG00000054728	Phactr1	ENSMUSG00000054728:Phactr1.4	0.418231	chr13	42709040	42710040
ENSMUSG00000097806	2.82605	0.196066	2.44467e-09	1.17622e-07	Gm6556	ENSMUSG00000097806	Gm6556	ENSMUSG00000097806:Gm6556	0.422848	chr13	15462169	15463169
ENSMUSG00000045827	4.05575	2.73408	8.99548e-56	2.36302e-53	Serpinb9	ENSMUSG00000045827	Serpinb9	ENSMUSG00000045827:Serpinb9.1	0.437711	chr13	33004019	33005019
ENSMUSG00000051037	1.5227	1.89818	2.27747e-08	9.27794e-07	Zfp455	ENSMUSG00000051037	Zfp455	ENSMUSG00000051037:Zfp455	0.447722	chr13	67193998	67194998
ENSMUSG00000021359	1.24448	-0.385	0.00806116	0.0964851	Tfap2a	ENSMUSG00000021359	Tfap2a	ENSMUSG00000021359:Tfap2a.6	0.45015	chr13	40733475	40734475
ENSMUSG00000022099	1.37379	1.56364	4.92568e-06	0.000137199	Dmtn	ENSMUSG00000022099	Dmtn	ENSMUSG00000022099:Dmtn.6	0.00204414	chr14	70628499	70629499
ENSMUSG00000021991	1.92242	3.79369	5.61432e-27	8.52556e-25	Cacna2d3	ENSMUSG00000021991	Cacna2d3	ENSMUSG00000021991:Cacna2d3.7	0.00294218	chr14	29721364	29722364
ENSMUSG00000021991	1.92242	3.79369	5.61432e-27	8.52556e-25	Cacna2d3	ENSMUSG00000021991	Cacna2d3	ENSMUSG00000021991:Cacna2d3.6	0.00458421	chr14	29721295	29722295
ENSMUSG00000021965	0.667722	4.1255	6.9399e-06	0.000186374	Ska3	ENSMUSG00000021965	Ska3	ENSMUSG00000021965:Ska3.2	0.00747353	chr14	57825660	57826660
ENSMUSG00000037572	0.646749	5.13666	2.17925e-10	1.19579e-08	Wdhd1	ENSMUSG00000037572	Wdhd1	ENSMUSG00000037572:Wdhd1.4	0.00768958	chr14	47276357	47277357
ENSMUSG00000021965	0.667722	4.1255	6.9399e-06	0.000186374	Ska3	ENSMUSG00000021965	Ska3	ENSMUSG00000021965:Ska3.3	0.00799104	chr14	57825685	57826685
ENSMUSG00000044447	0.539843	3.4707	0.0134247	0.145475	Dock5	ENSMUSG00000044447	Dock5	ENSMUSG00000044447:Dock5.1	0.0129912	chr14	67932937	67933937
ENSMUSG00000037572	0.646749	5.13666	2.17925e-10	1.19579e-08	Wdhd1	ENSMUSG00000037572	Wdhd1	ENSMUSG00000037572:Wdhd1.2	0.0138062	chr14	47276307	47277307
ENSMUSG00000037572	0.646749	5.13666	2.17925e-10	1.19579e-08	Wdhd1	ENSMUSG00000037572	Wdhd1	ENSMUSG00000037572:Wdhd1.3	0.0149872	chr14	47276332	47277332
ENSMUSG00000022108	0.758436	8.12391	2.71805e-21	3.2608e-19	Itm2b	ENSMUSG00000022108	Itm2b	ENSMUSG00000022108:Itm2b.4	0.0151174	chr14	73384789	73385789
ENSMUSG00000022099	1.37379	1.56364	4.92568e-06	0.000137199	Dmtn	ENSMUSG00000022099	Dmtn	ENSMUSG00000022099:Dmtn.4	0.0154474	chr14	70626554	70627554
ENSMUSG00000021904	2.61777	-1.585	0.000267171	0.00520318	Sema3g	ENSMUSG00000021904	Sema3g	ENSMUSG00000021904:Sema3g	0.0165591	chr14	31217338	31218338
ENSMUSG00000056296	1.89841	2.43717	0.0101681	0.116191	Synpr	ENSMUSG00000056296	Synpr	ENSMUSG00000056296:Synpr	0.0176367	chr14	13284288	13285288
ENSMUSG00000022035	0.838071	5.2859	1.61676e-17	1.57567e-15	Ccdc25	ENSMUSG00000022035	Ccdc25	ENSMUSG00000022035:Ccdc25	0.0199489	chr14	65836809	65837809
ENSMUSG00000021965	0.667722	4.1255	6.9399e-06	0.000186374	Ska3	ENSMUSG00000021965	Ska3	ENSMUSG00000021965:Ska3.1	0.0207892	chr14	57825608	57826608
ENSMUSG00000022099	1.37379	1.56364	4.92568e-06	0.000137199	Dmtn	ENSMUSG00000022099	Dmtn	ENSMUSG00000022099:Dmtn.5	0.0220606	chr14	70626808	70627808
ENSMUSG00000037628	0.855537	2.56523	0.000106245	0.00226292	Cdkn3	ENSMUSG00000037628	Cdkn3	ENSMUSG00000037628:Cdkn3	0.0243734	chr14	46760046	46761046
ENSMUSG00000022108	0.758436	8.12391	2.71805e-21	3.2608e-19	Itm2b	ENSMUSG00000022108	Itm2b	ENSMUSG00000022108:Itm2b.3	0.0444987	chr14	73384698	73385698
ENSMUSG00000016831	0.629193	6.89726	1.5889e-14	1.22678e-12	Tox4	ENSMUSG00000016831	Tox4	ENSMUSG00000016831:Tox4.2	0.0450754	chr14	52279210	52280210
ENSMUSG00000016831	0.629193	6.89726	1.5889e-14	1.22678e-12	Tox4	ENSMUSG00000016831	Tox4	ENSMUSG00000016831:Tox4.1	0.0465756	chr14	52279069	52280069
ENSMUSG00000022094	0.658408	5.6117	3.96952e-12	2.59941e-10	Slc39a14	ENSMUSG00000022094	Slc39a14	ENSMUSG00000022094:Slc39a14.7	0.0477664	chr14	70350920	70351920
ENSMUSG00000022094	0.658408	5.6117	3.96952e-12	2.59941e-10	Slc39a14	ENSMUSG00000022094	Slc39a14	ENSMUSG00000022094:Slc39a14.6	0.0511256	chr14	70350894	70351894
ENSMUSG00000064128	1.46449	4.31498	2.7867e-28	4.51682e-26	Cenpj	ENSMUSG00000064128	Cenpj	ENSMUSG00000064128:Cenpj.2	0.0536106	chr14	56571346	56572346
ENSMUSG00000068417	1.31331	-1.5958	0.0353335	0.305529	Pnp2	ENSMUSG00000068417	Pnp2	ENSMUSG00000068417:Pnp2.1	0.0757597	chr14	50955722	50956722
ENSMUSG00000047098	1.38883	5.14326	2.05709e-39	4.23538e-37	Rnf31	ENSMUSG00000047098	Rnf31	ENSMUSG00000047098:Rnf31.1	0.0814453	chr14	55591753	55592753
ENSMUSG00000022037	0.934494	4.81856	2.27053e-09	1.09822e-07	Clu	ENSMUSG00000022037	Clu	ENSMUSG00000022037:Clu.1	0.0833578	chr14	65968126	65969126
ENSMUSG00000089785	2.42131	-2.93635	0.0227446	0.219519	Slc25a5-ps	ENSMUSG00000089785	Slc25a5-ps	ENSMUSG00000089785:Slc25a5-ps.1	0.0856321	chr14	11161668	11162668
ENSMUSG00000022034	0.583468	4.49994	2.31643e-06	6.87974e-05	Esco2	ENSMUSG00000022034	Esco2	ENSMUSG00000022034:Esco2.4	0.0863116	chr14	65833494	65834494
ENSMUSG00000022034	0.583468	4.49994	2.31643e-06	6.87974e-05	Esco2	ENSMUSG00000022034	Esco2	ENSMUSG00000022034:Esco2.3	0.0871378	chr14	65833408	65834408
ENSMUSG00000097589	0.730925	5.48297	2.88229e-10	1.5481e-08	Dleu2	ENSMUSG00000097589	Dleu2	ENSMUSG00000097589:Dleu2.4	0.0939232	chr14	61648287	61649287
ENSMUSG00000093452	0.640635	2.95088	0.000921408	0.0154951	Zfhx2os	ENSMUSG00000093452	Zfhx2os	ENSMUSG00000093452:Zfhx2os	0.0952616	chr14	55053347	55054347
ENSMUSG00000097589	0.730925	5.48297	2.88229e-10	1.5481e-08	Dleu2	ENSMUSG00000097589	Dleu2	ENSMUSG00000097589:Dleu2.3	0.0963784	chr14	61648262	61649262
ENSMUSG00000079197	3.3561	6.48126	2.8218e-240	1.74295e-237	Psme2	ENSMUSG00000079197	Psme2	ENSMUSG00000079197:Psme2.6	0.0966657	chr14	55590473	55591473
ENSMUSG00000079197	3.3561	6.48126	2.8218e-240	1.74295e-237	Psme2	ENSMUSG00000079197	Psme2	ENSMUSG00000079197:Psme2.4	0.0971441	chr14	55590395	55591395
ENSMUSG00000079197	3.3561	6.48126	2.8218e-240	1.74295e-237	Psme2	ENSMUSG00000079197	Psme2	ENSMUSG00000079197:Psme2.3	0.0975837	chr14	55590364	55591364
ENSMUSG00000022099	1.37379	1.56364	4.92568e-06	0.000137199	Dmtn	ENSMUSG00000022099	Dmtn	ENSMUSG00000022099:Dmtn.1	0.0984826	chr14	70617236	70618236
ENSMUSG00000097589	0.730925	5.48297	2.88229e-10	1.5481e-08	Dleu2	ENSMUSG00000097589	Dleu2	ENSMUSG00000097589:Dleu2.5	0.098981	chr14	61648322	61649322
ENSMUSG00000079197	3.3561	6.48126	2.8218e-240	1.74295e-237	Psme2	ENSMUSG00000079197	Psme2	ENSMUSG00000079197:Psme2.5	0.099194	chr14	55590448	55591448
ENSMUSG00000093452	0.640635	2.95088	0.000921408	0.0154951	Zfhx2os	ENSMUSG00000093452	Zfhx2os	ENSMUSG00000093452:Zfhx2os.1	0.0999995	chr14	55053425	55054425
ENSMUSG00000097589	0.730925	5.48297	2.88229e-10	1.5481e-08	Dleu2	ENSMUSG00000097589	Dleu2	ENSMUSG00000097589:Dleu2.2	0.101907	chr14	61648122	61649122
ENSMUSG00000079197	3.3561	6.48126	2.8218e-240	1.74295e-237	Psme2	ENSMUSG00000079197	Psme2	ENSMUSG00000079197:Psme2.7	0.104204	chr14	55590587	55591587
ENSMUSG00000021983	0.833368	1.56801	0.00596959	0.075209	Atp8a2	ENSMUSG00000021983	Atp8a2	ENSMUSG00000021983:Atp8a2.3	0.107124	chr14	60177039	60178039
ENSMUSG00000068417	1.31331	-1.5958	0.0353335	0.305529	Pnp2	ENSMUSG00000068417	Pnp2	ENSMUSG00000068417:Pnp2	0.107355	chr14	50955470	50956470
ENSMUSG00000079197	3.3561	6.48126	2.8218e-240	1.74295e-237	Psme2	ENSMUSG00000079197	Psme2	ENSMUSG00000079197:Psme2.8	0.107611	chr14	55590601	55591601
ENSMUSG00000079197	3.3561	6.48126	2.8218e-240	1.74295e-237	Psme2	ENSMUSG00000079197	Psme2	ENSMUSG00000079197:Psme2.9	0.109403	chr14	55590613	55591613
ENSMUSG00000075502	0.592718	2.27846	0.0185981	0.188321	Kbtbd6	ENSMUSG00000075502	Kbtbd6	ENSMUSG00000075502:Kbtbd6	0.110305	chr14	79451313	79452313
ENSMUSG00000037544	0.609142	5.32416	2.73288e-09	1.30938e-07	Dlgap5	ENSMUSG00000037544	Dlgap5	ENSMUSG00000037544:Dlgap5.5	0.115662	chr14	47417677	47418677
ENSMUSG00000022099	1.37379	1.56364	4.92568e-06	0.000137199	Dmtn	ENSMUSG00000022099	Dmtn	ENSMUSG00000022099:Dmtn.2	0.11593	chr14	70618045	70619045
ENSMUSG00000022037	0.934494	4.81856	2.27053e-09	1.09822e-07	Clu	ENSMUSG00000022037	Clu	ENSMUSG00000022037:Clu	0.117933	chr14	65967961	65968961
ENSMUSG00000037544	0.609142	5.32416	2.73288e-09	1.30938e-07	Dlgap5	ENSMUSG00000037544	Dlgap5	ENSMUSG00000037544:Dlgap5.6	0.119289	chr14	47417704	47418704
ENSMUSG00000022075	0.779941	6.68074	9.44996e-16	8.11915e-14	Rhobtb2	ENSMUSG00000022075	Rhobtb2	ENSMUSG00000022075:Rhobtb2.1	0.122167	chr14	69804725	69805725
ENSMUSG00000047098	1.38883	5.14326	2.05709e-39	4.23538e-37	Rnf31	ENSMUSG00000047098	Rnf31	ENSMUSG00000047098:Rnf31	0.123866	chr14	55591204	55592204
ENSMUSG00000015966	2.01135	-2.5387	0.0236243	0.225479	Il17rb	ENSMUSG00000015966	Il17rb	ENSMUSG00000015966:Il17rb.2	0.128133	chr14	30008311	30009311
ENSMUSG00000016831	0.629193	6.89726	1.5889e-14	1.22678e-12	Tox4	ENSMUSG00000016831	Tox4	ENSMUSG00000016831:Tox4	0.132468	chr14	52278624	52279624
ENSMUSG00000047098	1.38883	5.14326	2.05709e-39	4.23538e-37	Rnf31	ENSMUSG00000047098	Rnf31	ENSMUSG00000047098:Rnf31.2	0.135558	chr14	55591945	55592945
ENSMUSG00000015966	2.01135	-2.5387	0.0236243	0.225479	Il17rb	ENSMUSG00000015966	Il17rb	ENSMUSG00000015966:Il17rb.3	0.141826	chr14	30008396	30009396
ENSMUSG00000037544	0.609142	5.32416	2.73288e-09	1.30938e-07	Dlgap5	ENSMUSG00000037544	Dlgap5	ENSMUSG00000037544:Dlgap5.1	0.148252	chr14	47395461	47396461
ENSMUSG00000022021	0.59141	4.48754	1.71951e-06	5.22574e-05	Diaph3	ENSMUSG00000022021	Diaph3	ENSMUSG00000022021:Diaph3.5	0.151428	chr14	87140724	87141724
ENSMUSG00000022021	0.59141	4.48754	1.71951e-06	5.22574e-05	Diaph3	ENSMUSG00000022021	Diaph3	ENSMUSG00000022021:Diaph3.6	0.151428	chr14	87140735	87141735
ENSMUSG00000037544	0.609142	5.32416	2.73288e-09	1.30938e-07	Dlgap5	ENSMUSG00000037544	Dlgap5	ENSMUSG00000037544:Dlgap5.7	0.151891	chr14	47417907	47418907
ENSMUSG00000022021	0.59141	4.48754	1.71951e-06	5.22574e-05	Diaph3	ENSMUSG00000022021	Diaph3	ENSMUSG00000022021:Diaph3.4	0.153672	chr14	87140667	87141667
ENSMUSG00000022021	0.59141	4.48754	1.71951e-06	5.22574e-05	Diaph3	ENSMUSG00000022021	Diaph3	ENSMUSG00000022021:Diaph3.3	0.156919	chr14	87140643	87141643
ENSMUSG00000022075	0.779941	6.68074	9.44996e-16	8.11915e-14	Rhobtb2	ENSMUSG00000022075	Rhobtb2	ENSMUSG00000022075:Rhobtb2.2	0.157323	chr14	69805026	69806026
ENSMUSG00000100162	0.940107	1.77715	0.000658032	0.0115185	Gm20687	ENSMUSG00000100162	Gm20687	ENSMUSG00000100162:Gm20687	0.164102	chr14	55054429	55055429
ENSMUSG00000022075	0.779941	6.68074	9.44996e-16	8.11915e-14	Rhobtb2	ENSMUSG00000022075	Rhobtb2	ENSMUSG00000022075:Rhobtb2.3	0.166142	chr14	69805136	69806136
ENSMUSG00000089785	2.42131	-2.93635	0.0227446	0.219519	Slc25a5-ps	ENSMUSG00000089785	Slc25a5-ps	ENSMUSG00000089785:Slc25a5-ps	0.16937	chr14	11161007	11162007
ENSMUSG00000025279	4.66803	-2.13122	1.05748e-05	0.000274632	Dnase1l3	ENSMUSG00000025279	Dnase1l3	ENSMUSG00000025279:Dnase1l3.1	0.188358	chr14	7994073	7995073
ENSMUSG00000048922	0.692681	5.49921	4.18458e-11	2.5068e-09	Cdca2	ENSMUSG00000048922	Cdca2	ENSMUSG00000048922:Cdca2.2	0.195855	chr14	67714875	67715875
ENSMUSG00000048922	0.692681	5.49921	4.18458e-11	2.5068e-09	Cdca2	ENSMUSG00000048922	Cdca2	ENSMUSG00000048922:Cdca2.5	0.20227	chr14	67715341	67716341
ENSMUSG00000097545	0.618513	4.48888	6.44594e-07	2.13038e-05	Mir124a-1hg	ENSMUSG00000097545	Mir124a-1hg	ENSMUSG00000097545:Mir124a-1hg.1	0.204982	chr14	64587529	64588529
ENSMUSG00000034327	0.548579	3.45927	0.00095217	0.0159304	Kctd9	ENSMUSG00000034327	Kctd9	ENSMUSG00000034327:Kctd9	0.208623	chr14	67715415	67716415
ENSMUSG00000097589	0.730925	5.48297	2.88229e-10	1.5481e-08	Dleu2	ENSMUSG00000097589	Dleu2	ENSMUSG00000097589:Dleu2.7	0.211182	chr14	61681814	61682814
ENSMUSG00000034327	0.548579	3.45927	0.00095217	0.0159304	Kctd9	ENSMUSG00000034327	Kctd9	ENSMUSG00000034327:Kctd9.1	0.211246	chr14	67715602	67716602
ENSMUSG00000048922	0.692681	5.49921	4.18458e-11	2.5068e-09	Cdca2	ENSMUSG00000048922	Cdca2	ENSMUSG00000048922:Cdca2.3	0.211922	chr14	67715110	67716110
ENSMUSG00000048922	0.692681	5.49921	4.18458e-11	2.5068e-09	Cdca2	ENSMUSG00000048922	Cdca2	ENSMUSG00000048922:Cdca2.4	0.212008	chr14	67715181	67716181
ENSMUSG00000097589	0.730925	5.48297	2.88229e-10	1.5481e-08	Dleu2	ENSMUSG00000097589	Dleu2	ENSMUSG00000097589:Dleu2.8	0.212522	chr14	61681825	61682825
ENSMUSG00000097589	0.730925	5.48297	2.88229e-10	1.5481e-08	Dleu2	ENSMUSG00000097589	Dleu2	ENSMUSG00000097589:Dleu2.6	0.213002	chr14	61681802	61682802
ENSMUSG00000097589	0.730925	5.48297	2.88229e-10	1.5481e-08	Dleu2	ENSMUSG00000097589	Dleu2	ENSMUSG00000097589:Dleu2.9	0.213717	chr14	61681873	61682873
ENSMUSG00000034327	0.548579	3.45927	0.00095217	0.0159304	Kctd9	ENSMUSG00000034327	Kctd9	ENSMUSG00000034327:Kctd9.2	0.218841	chr14	67715751	67716751
ENSMUSG00000021809	0.560347	3.39092	0.000984446	0.0163507	Nudt13	ENSMUSG00000021809	Nudt13	ENSMUSG00000021809:Nudt13	0.230774	chr14	20294210	20295210
ENSMUSG00000100162	0.940107	1.77715	0.000658032	0.0115185	Gm20687	ENSMUSG00000100162	Gm20687	ENSMUSG00000100162:Gm20687.1	0.235654	chr14	55054971	55055971
ENSMUSG00000059674	1.38832	3.5575	4.37451e-13	3.10964e-11	Cdh24	ENSMUSG00000059674	Cdh24	ENSMUSG00000059674:Cdh24.1	0.236413	chr14	54640864	54641864
ENSMUSG00000021983	0.833368	1.56801	0.00596959	0.075209	Atp8a2	ENSMUSG00000021983	Atp8a2	ENSMUSG00000021983:Atp8a2	0.272576	chr14	60086334	60087334
ENSMUSG00000102189	0.896975	0.26568	0.0318785	0.283428	Gm37194	ENSMUSG00000102189	Gm37194	ENSMUSG00000102189:Gm37194	0.278453	chr14	50060838	50061838
ENSMUSG00000097545	0.618513	4.48888	6.44594e-07	2.13038e-05	Mir124a-1hg	ENSMUSG00000097545	Mir124a-1hg	ENSMUSG00000097545:Mir124a-1hg.2	0.27961	chr14	64588012	64589012
ENSMUSG00000021983	0.833368	1.56801	0.00596959	0.075209	Atp8a2	ENSMUSG00000021983	Atp8a2	ENSMUSG00000021983:Atp8a2.1	0.291154	chr14	60086382	60087382
ENSMUSG00000022021	0.59141	4.48754	1.71951e-06	5.22574e-05	Diaph3	ENSMUSG00000022021	Diaph3	ENSMUSG00000022021:Diaph3	0.292069	chr14	86748344	86749344
ENSMUSG00000022021	0.59141	4.48754	1.71951e-06	5.22574e-05	Diaph3	ENSMUSG00000022021	Diaph3	ENSMUSG00000022021:Diaph3.1	0.292579	chr14	86748633	86749633
ENSMUSG00000097545	0.618513	4.48888	6.44594e-07	2.13038e-05	Mir124a-1hg	ENSMUSG00000097545	Mir124a-1hg	ENSMUSG00000097545:Mir124a-1hg	0.309633	chr14	64586809	64587809
ENSMUSG00000022061	1.68625	-0.586056	0.000612311	0.0108102	Nkx3-1	ENSMUSG00000022061	Nkx3-1	ENSMUSG00000022061:Nkx3-1	0.318874	chr14	69190116	69191116
ENSMUSG00000021983	0.833368	1.56801	0.00596959	0.075209	Atp8a2	ENSMUSG00000021983	Atp8a2	ENSMUSG00000021983:Atp8a2.2	0.364476	chr14	60086855	60087855
ENSMUSG00000033060	0.538955	3.01449	0.00993755	0.114083	Lmo7	ENSMUSG00000033060	Lmo7	ENSMUSG00000033060:Lmo7	0.367088	chr14	101729435	101730435
ENSMUSG00000097545	0.618513	4.48888	6.44594e-07	2.13038e-05	Mir124a-1hg	ENSMUSG00000097545	Mir124a-1hg	ENSMUSG00000097545:Mir124a-1hg.3	0.404811	chr14	64589173	64590173
ENSMUSG00000068101	0.505062	4.02	0.000334547	0.00637942	Cenpm	ENSMUSG00000068101	Cenpm	ENSMUSG00000068101:Cenpm.2	0.000376839	chr15	82244173	82245173
ENSMUSG00000033762	0.504005	3.07987	0.0067562	0.0833052	Recql4	ENSMUSG00000033762	Recql4	ENSMUSG00000033762:Recql4.1	0.00149217	chr15	76709967	76710967
ENSMUSG00000033762	0.504005	3.07987	0.0067562	0.0833052	Recql4	ENSMUSG00000033762	Recql4	ENSMUSG00000033762:Recql4.3	0.0045104	chr15	76710048	76711048
ENSMUSG00000033762	0.504005	3.07987	0.0067562	0.0833052	Recql4	ENSMUSG00000033762	Recql4	ENSMUSG00000033762:Recql4.2	0.00490551	chr15	76710033	76711033
ENSMUSG00000068101	0.505062	4.02	0.000334547	0.00637942	Cenpm	ENSMUSG00000068101	Cenpm	ENSMUSG00000068101:Cenpm.3	0.00500616	chr15	82244227	82245227
ENSMUSG00000033762	0.504005	3.07987	0.0067562	0.0833052	Recql4	ENSMUSG00000033762	Recql4	ENSMUSG00000033762:Recql4	0.00972675	chr15	76709710	76710710
ENSMUSG00000049148	1.91793	1.0775	2.19821e-07	7.81914e-06	Plcxd3	ENSMUSG00000049148	Plcxd3	ENSMUSG00000049148:Plcxd3	0.00977527	chr15	4374975	4375975
ENSMUSG00000068101	0.505062	4.02	0.000334547	0.00637942	Cenpm	ENSMUSG00000068101	Cenpm	ENSMUSG00000068101:Cenpm	0.0119614	chr15	82243835	82244835
ENSMUSG00000044250	1.03461	1.4067	0.00106842	0.017611	Pced1b	ENSMUSG00000044250	Pced1b	ENSMUSG00000044250:Pced1b	0.0121366	chr15	97246585	97247585
ENSMUSG00000068101	0.505062	4.02	0.000334547	0.00637942	Cenpm	ENSMUSG00000068101	Cenpm	ENSMUSG00000068101:Cenpm.1	0.0124515	chr15	82243910	82244910
ENSMUSG00000068101	0.505062	4.02	0.000334547	0.00637942	Cenpm	ENSMUSG00000068101	Cenpm	ENSMUSG00000068101:Cenpm.4	0.0125073	chr15	82244248	82245248
ENSMUSG00000054263	0.985712	7.48994	9.14313e-30	1.58301e-27	Lifr	ENSMUSG00000054263	Lifr	ENSMUSG00000054263:Lifr.1	0.012644	chr15	7129043	7130043
ENSMUSG00000033088	0.66102	5.14418	3.85773e-11	2.31707e-09	Triobp	ENSMUSG00000033088	Triobp	ENSMUSG00000033088:Triobp.4	0.0142809	chr15	78982551	78983551
ENSMUSG00000033565	0.511619	6.5632	1.41497e-09	6.99949e-08	Rbfox2	ENSMUSG00000033565	Rbfox2	ENSMUSG00000033565:Rbfox2.7	0.01449	chr15	77202936	77203936
ENSMUSG00000037617	0.670273	3.30419	0.00015394	0.00315811	Spag1	ENSMUSG00000037617	Spag1	ENSMUSG00000037617:Spag1.5	0.0144981	chr15	36209940	36210940
ENSMUSG00000033088	0.66102	5.14418	3.85773e-11	2.31707e-09	Triobp	ENSMUSG00000033088	Triobp	ENSMUSG00000033088:Triobp	0.0172827	chr15	78947202	78948202
ENSMUSG00000048218	1.15776	1.93233	1.91697e-05	0.000476719	Amigo2	ENSMUSG00000048218	Amigo2	ENSMUSG00000048218:Amigo2.1	0.0213963	chr15	97246787	97247787
ENSMUSG00000056665	0.618655	4.70287	9.45452e-08	3.58034e-06	Them6	ENSMUSG00000056665	Them6	ENSMUSG00000056665:Them6	0.0263966	chr15	74720682	74721682
ENSMUSG00000023004	0.595353	9.15793	2.12783e-12	1.424e-10	Tuba1b	ENSMUSG00000023004	Tuba1b	ENSMUSG00000023004:Tuba1b	0.0312912	chr15	98933938	98934938
ENSMUSG00000033088	0.66102	5.14418	3.85773e-11	2.31707e-09	Triobp	ENSMUSG00000033088	Triobp	ENSMUSG00000033088:Triobp.1	0.0345572	chr15	78947397	78948397
ENSMUSG00000022246	0.647698	2.62083	0.00846171	0.100173	Rai14	ENSMUSG00000022246	Rai14	ENSMUSG00000022246:Rai14.4	0.0365152	chr15	10714063	10715063
ENSMUSG00000022246	0.647698	2.62083	0.00846171	0.100173	Rai14	ENSMUSG00000022246	Rai14	ENSMUSG00000022246:Rai14.3	0.0374143	chr15	10713598	10714598
ENSMUSG00000048218	1.15776	1.93233	1.91697e-05	0.000476719	Amigo2	ENSMUSG00000048218	Amigo2	ENSMUSG00000048218:Amigo2	0.0396916	chr15	97246622	97247622
ENSMUSG00000068105	2.52969	-0.490023	7.71157e-07	2.51592e-05	Tnfrsf13c	ENSMUSG00000068105	Tnfrsf13c	ENSMUSG00000068105:Tnfrsf13c	0.0398999	chr15	82223802	82224802
ENSMUSG00000022246	0.647698	2.62083	0.00846171	0.100173	Rai14	ENSMUSG00000022246	Rai14	ENSMUSG00000022246:Rai14.5	0.0408912	chr15	10714124	10715124
ENSMUSG00000033088	0.66102	5.14418	3.85773e-11	2.31707e-09	Triobp	ENSMUSG00000033088	Triobp	ENSMUSG00000033088:Triobp.2	0.0425811	chr15	78947723	78948723
ENSMUSG00000023004	0.595353	9.15793	2.12783e-12	1.424e-10	Tuba1b	ENSMUSG00000023004	Tuba1b	ENSMUSG00000023004:Tuba1b.1	0.0446092	chr15	98934065	98935065
ENSMUSG00000018169	0.91611	-0.289329	0.041474	0.340279	Mfng	ENSMUSG00000018169	Mfng	ENSMUSG00000018169:Mfng.3	0.0474038	chr15	78772975	78773975
ENSMUSG00000068105	2.52969	-0.490023	7.71157e-07	2.51592e-05	Tnfrsf13c	ENSMUSG00000068105	Tnfrsf13c	ENSMUSG00000068105:Tnfrsf13c.1	0.0512363	chr15	82223839	82224839
ENSMUSG00000033565	0.511619	6.5632	1.41497e-09	6.99949e-08	Rbfox2	ENSMUSG00000033565	Rbfox2	ENSMUSG00000033565:Rbfox2.12	0.052933	chr15	77306504	77307504
ENSMUSG00000033565	0.511619	6.5632	1.41497e-09	6.99949e-08	Rbfox2	ENSMUSG00000033565	Rbfox2	ENSMUSG00000033565:Rbfox2.11	0.0554951	chr15	77306428	77307428
ENSMUSG00000032783	0.738508	4.28629	1.04836e-08	4.54636e-07	Troap	ENSMUSG00000032783	Troap	ENSMUSG00000032783:Troap.1	0.0617418	chr15	99074482	99075482
ENSMUSG00000022244	0.774735	2.84868	0.000113467	0.00240443	Amacr	ENSMUSG00000022244	Amacr	ENSMUSG00000022244:Amacr	0.0651226	chr15	10981234	10982234
ENSMUSG00000023031	1.5674	1.02848	6.61905e-06	0.00017902	Cela1	ENSMUSG00000023031	Cela1	ENSMUSG00000023031:Cela1.4	0.0658365	chr15	100682619	100683619
ENSMUSG00000058290	0.661183	5.67696	6.51728e-09	2.92337e-07	Espl1	ENSMUSG00000058290	Espl1	ENSMUSG00000058290:Espl1	0.0677887	chr15	102295763	102296763
ENSMUSG00000032783	0.738508	4.28629	1.04836e-08	4.54636e-07	Troap	ENSMUSG00000032783	Troap	ENSMUSG00000032783:Troap	0.0712713	chr15	99074053	99075053
ENSMUSG00000039385	0.708775	5.30912	3.30494e-10	1.76475e-08	Cdh6	ENSMUSG00000039385	Cdh6	ENSMUSG00000039385:Cdh6	0.0714856	chr15	13173175	13174175
ENSMUSG00000068105	2.52969	-0.490023	7.71157e-07	2.51592e-05	Tnfrsf13c	ENSMUSG00000068105	Tnfrsf13c	ENSMUSG00000068105:Tnfrsf13c.2	0.0775834	chr15	82223853	82224853
ENSMUSG00000022425	0.749985	8.73761	8.72592e-20	9.87238e-18	Enpp2	ENSMUSG00000022425	Enpp2	ENSMUSG00000022425:Enpp2.7	0.081763	chr15	54952392	54953392
ENSMUSG00000033565	0.511619	6.5632	1.41497e-09	6.99949e-08	Rbfox2	ENSMUSG00000033565	Rbfox2	ENSMUSG00000033565:Rbfox2.10	0.0834057	chr15	77306105	77307105
ENSMUSG00000022475	0.508933	4.69743	3.41352e-06	9.76378e-05	Hdac7	ENSMUSG00000022475	Hdac7	ENSMUSG00000022475:Hdac7.4	0.0921319	chr15	97830969	97831969
ENSMUSG00000068105	2.52969	-0.490023	7.71157e-07	2.51592e-05	Tnfrsf13c	ENSMUSG00000068105	Tnfrsf13c	ENSMUSG00000068105:Tnfrsf13c.3	0.0989016	chr15	82223869	82224869
ENSMUSG00000022475	0.508933	4.69743	3.41352e-06	9.76378e-05	Hdac7	ENSMUSG00000022475	Hdac7	ENSMUSG00000022475:Hdac7.5	0.10215	chr15	97830994	97831994
ENSMUSG00000022558	0.6092	5.70403	1.39787e-10	7.96681e-09	Mroh1	ENSMUSG00000022558	Mroh1	ENSMUSG00000022558:Mroh1	0.103903	chr15	76379739	76380739
ENSMUSG00000022558	0.6092	5.70403	1.39787e-10	7.96681e-09	Mroh1	ENSMUSG00000022558	Mroh1	ENSMUSG00000022558:Mroh1.1	0.107417	chr15	76380011	76381011
ENSMUSG00000058586	0.706619	2.09673	0.00452052	0.0599083	Serhl	ENSMUSG00000058586	Serhl	ENSMUSG00000058586:Serhl.9	0.124283	chr15	83112348	83113348
ENSMUSG00000040420	1.21789	1.14949	0.000429944	0.00793694	Cdh18	ENSMUSG00000040420	Cdh18	ENSMUSG00000040420:Cdh18.1	0.124766	chr15	23035937	23036937
ENSMUSG00000047003	0.702812	5.72803	8.10202e-12	5.12036e-10	Zfp41	ENSMUSG00000047003	Zfp41	ENSMUSG00000047003:Zfp41	0.127756	chr15	75616180	75617180
ENSMUSG00000000934	0.745252	1.21331	0.021881	0.213567	Top1mt	ENSMUSG00000000934	Top1mt	ENSMUSG00000000934:Top1mt.2	0.145927	chr15	75678300	75679300
ENSMUSG00000022360	0.628902	6.19394	1.45633e-12	9.8325e-11	Atad2	ENSMUSG00000022360	Atad2	ENSMUSG00000022360:Atad2.7	0.14868	chr15	58134582	58135582
ENSMUSG00000042622	2.18879	2.84209	6.71901e-24	9.33473e-22	Maff	ENSMUSG00000042622	Maff	ENSMUSG00000042622:Maff.3	0.164486	chr15	79347880	79348880
ENSMUSG00000022475	0.508933	4.69743	3.41352e-06	9.76378e-05	Hdac7	ENSMUSG00000022475	Hdac7	ENSMUSG00000022475:Hdac7.6	0.189105	chr15	97831267	97832267
ENSMUSG00000022422	0.881904	1.67926	0.00281728	0.0400535	Dscc1	ENSMUSG00000022422	Dscc1	ENSMUSG00000022422:Dscc1.1	0.192451	chr15	55089980	55090980
ENSMUSG00000042622	2.18879	2.84209	6.71901e-24	9.33473e-22	Maff	ENSMUSG00000042622	Maff	ENSMUSG00000042622:Maff.2	0.195467	chr15	79347542	79348542
ENSMUSG00000022422	0.881904	1.67926	0.00281728	0.0400535	Dscc1	ENSMUSG00000022422	Dscc1	ENSMUSG00000022422:Dscc1.2	0.196624	chr15	55089991	55090991
ENSMUSG00000022309	0.925319	3.26012	2.03841e-07	7.28474e-06	Angpt1	ENSMUSG00000022309	Angpt1	ENSMUSG00000022309:Angpt1.1	0.200377	chr15	42676477	42677477
ENSMUSG00000051920	1.80167	-1.89327	0.0178051	0.181944	Rspo2	ENSMUSG00000051920	Rspo2	ENSMUSG00000051920:Rspo2	0.22033	chr15	43170322	43171322
ENSMUSG00000042622	2.18879	2.84209	6.71901e-24	9.33473e-22	Maff	ENSMUSG00000042622	Maff	ENSMUSG00000042622:Maff.1	0.221912	chr15	79346998	79347998
ENSMUSG00000036800	1.30291	1.11513	0.000139716	0.00289885	Fam135b	ENSMUSG00000036800	Fam135b	ENSMUSG00000036800:Fam135b.2	0.226763	chr15	71727338	71728338
ENSMUSG00000091135	4.3258	-3.37829	0.0135461	0.14641	Lgals1-ps2	ENSMUSG00000091135	Lgals1-ps2	ENSMUSG00000091135:Lgals1-ps2	0.260885	chr15	79255052	79256052
ENSMUSG00000037627	3.5209	-0.54077	5.2562e-10	2.75833e-08	Rgs22	ENSMUSG00000037627	Rgs22	ENSMUSG00000037627:Rgs22.2	0.274316	chr15	36139885	36140885
ENSMUSG00000037627	3.5209	-0.54077	5.2562e-10	2.75833e-08	Rgs22	ENSMUSG00000037627	Rgs22	ENSMUSG00000037627:Rgs22.3	0.274316	chr15	36139900	36140900
ENSMUSG00000022425	0.749985	8.73761	8.72592e-20	9.87238e-18	Enpp2	ENSMUSG00000022425	Enpp2	ENSMUSG00000022425:Enpp2.5	0.281207	chr15	54919625	54920625
ENSMUSG00000037617	0.670273	3.30419	0.00015394	0.00315811	Spag1	ENSMUSG00000037617	Spag1	ENSMUSG00000037617:Spag1.2	0.290454	chr15	36179008	36180008
ENSMUSG00000022425	0.749985	8.73761	8.72592e-20	9.87238e-18	Enpp2	ENSMUSG00000022425	Enpp2	ENSMUSG00000022425:Enpp2.4	0.290741	chr15	54919518	54920518
ENSMUSG00000022425	0.749985	8.73761	8.72592e-20	9.87238e-18	Enpp2	ENSMUSG00000022425	Enpp2	ENSMUSG00000022425:Enpp2.3	0.29166	chr15	54919502	54920502
ENSMUSG00000022425	0.749985	8.73761	8.72592e-20	9.87238e-18	Enpp2	ENSMUSG00000022425	Enpp2	ENSMUSG00000022425:Enpp2.2	0.295561	chr15	54919461	54920461
ENSMUSG00000037617	0.670273	3.30419	0.00015394	0.00315811	Spag1	ENSMUSG00000037617	Spag1	ENSMUSG00000037617:Spag1.1	0.295945	chr15	36178846	36179846
ENSMUSG00000037617	0.670273	3.30419	0.00015394	0.00315811	Spag1	ENSMUSG00000037617	Spag1	ENSMUSG00000037617:Spag1.4	0.301792	chr15	36189242	36190242
ENSMUSG00000039007	0.682295	4.17533	2.53684e-07	8.88537e-06	Cpq	ENSMUSG00000039007	Cpq	ENSMUSG00000039007:Cpq	0.306724	chr15	33082629	33083629
ENSMUSG00000033669	0.639281	1.70941	0.0224896	0.217648	Zfp7	ENSMUSG00000033669	Zfp7	ENSMUSG00000033669:Zfp7	0.318097	chr15	76878775	76879775
ENSMUSG00000022269	1.12642	0.0969664	0.00766837	0.0927018	Marchf11	ENSMUSG00000022269	March11	ENSMUSG00000022269:Marchf11	0.321015	chr15	26308534	26309534
ENSMUSG00000039007	0.682295	4.17533	2.53684e-07	8.88537e-06	Cpq	ENSMUSG00000039007	Cpq	ENSMUSG00000039007:Cpq.1	0.335885	chr15	33082738	33083738
ENSMUSG00000033565	0.511619	6.5632	1.41497e-09	6.99949e-08	Rbfox2	ENSMUSG00000033565	Rbfox2	ENSMUSG00000033565:Rbfox2.2	0.344154	chr15	77132280	77133280
ENSMUSG00000022144	2.12599	-1.21636	0.000505697	0.00914698	Gdnf	ENSMUSG00000022144	Gdnf	ENSMUSG00000022144:Gdnf	0.344968	chr15	7810324	7811324
ENSMUSG00000036273	0.8066	3.23367	1.09767e-05	0.000284423	Lrrk2	ENSMUSG00000036273	Lrrk2	ENSMUSG00000036273:Lrrk2	0.360021	chr15	91672653	91673653
ENSMUSG00000058586	0.706619	2.09673	0.00452052	0.0599083	Serhl	ENSMUSG00000058586	Serhl	ENSMUSG00000058586:Serhl.3	0.387667	chr15	83099727	83100727
ENSMUSG00000036661	1.01211	2.08214	6.13831e-05	0.0013794	Dennd3	ENSMUSG00000036661	Dennd3	ENSMUSG00000036661:Dennd3.1	0.391813	chr15	73512150	73513150
ENSMUSG00000022479	5.55822	2.90095	2.68649e-82	8.58701e-80	Vdr	ENSMUSG00000022479	Vdr	ENSMUSG00000022479:Vdr.2	0.394309	chr15	97907810	97908810
ENSMUSG00000022309	0.925319	3.26012	2.03841e-07	7.28474e-06	Angpt1	ENSMUSG00000022309	Angpt1	ENSMUSG00000022309:Angpt1	0.404859	chr15	42676249	42677249
ENSMUSG00000033565	0.511619	6.5632	1.41497e-09	6.99949e-08	Rbfox2	ENSMUSG00000033565	Rbfox2	ENSMUSG00000033565:Rbfox2.3	0.409771	chr15	77153056	77154056
ENSMUSG00000033565	0.511619	6.5632	1.41497e-09	6.99949e-08	Rbfox2	ENSMUSG00000033565	Rbfox2	ENSMUSG00000033565:Rbfox2.5	0.420766	chr15	77153286	77154286
ENSMUSG00000033565	0.511619	6.5632	1.41497e-09	6.99949e-08	Rbfox2	ENSMUSG00000033565	Rbfox2	ENSMUSG00000033565:Rbfox2.4	0.420973	chr15	77153254	77154254
ENSMUSG00000036661	1.01211	2.08214	6.13831e-05	0.0013794	Dennd3	ENSMUSG00000036661	Dennd3	ENSMUSG00000036661:Dennd3	0.432197	chr15	73512038	73513038
ENSMUSG00000033565	0.511619	6.5632	1.41497e-09	6.99949e-08	Rbfox2	ENSMUSG00000033565	Rbfox2	ENSMUSG00000033565:Rbfox2.6	0.436515	chr15	77153312	77154312
ENSMUSG00000033565	0.511619	6.5632	1.41497e-09	6.99949e-08	Rbfox2	ENSMUSG00000033565	Rbfox2	ENSMUSG00000033565:Rbfox2.9	0.496863	chr15	77245086	77246086
ENSMUSG00000033565	0.511619	6.5632	1.41497e-09	6.99949e-08	Rbfox2	ENSMUSG00000033565	Rbfox2	ENSMUSG00000033565:Rbfox2.8	0.499168	chr15	77245006	77246006
ENSMUSG00000033031	0.591955	6.04433	1.06438e-09	5.37579e-08	Cip2a	ENSMUSG00000033031	Cip2a	ENSMUSG00000033031:Cip2a	3.46149e-05	chr16	48993682	48994682
ENSMUSG00000055447	0.758234	7.49266	2.33729e-21	2.8413e-19	Cd47	ENSMUSG00000055447	Cd47	ENSMUSG00000055447:Cd47.1	0.00140742	chr16	49854844	49855844
ENSMUSG00000055447	0.758234	7.49266	2.33729e-21	2.8413e-19	Cd47	ENSMUSG00000055447	Cd47	ENSMUSG00000055447:Cd47.2	0.00201685	chr16	49855122	49856122
ENSMUSG00000013539	0.587432	4.09816	4.63903e-05	0.00107362	Tango2	ENSMUSG00000013539	Tango2	ENSMUSG00000013539:Tango2.9	0.00303943	chr16	18343432	18344432
ENSMUSG00000039680	0.847265	5.36735	5.24415e-16	4.61849e-14	Mrps6	ENSMUSG00000039680	Mrps6	ENSMUSG00000039680:Mrps6.1	0.00520391	chr16	92058291	92059291
ENSMUSG00000013539	0.587432	4.09816	4.63903e-05	0.00107362	Tango2	ENSMUSG00000013539	Tango2	ENSMUSG00000013539:Tango2.8	0.00585994	chr16	18343406	18344406
ENSMUSG00000013539	0.587432	4.09816	4.63903e-05	0.00107362	Tango2	ENSMUSG00000013539	Tango2	ENSMUSG00000013539:Tango2.10	0.00668224	chr16	18343542	18344542
ENSMUSG00000055447	0.758234	7.49266	2.33729e-21	2.8413e-19	Cd47	ENSMUSG00000055447	Cd47	ENSMUSG00000055447:Cd47.3	0.00690046	chr16	49855265	49856265
ENSMUSG00000022747	0.559983	4.47845	1.83752e-06	5.55486e-05	St3gal6	ENSMUSG00000022747	St3gal6	ENSMUSG00000022747:St3gal6.7	0.00699453	chr16	58523053	58524053
ENSMUSG00000022686	0.730283	4.5075	6.73631e-10	3.4752e-08	B3gnt5	ENSMUSG00000022686	B3gnt5	ENSMUSG00000022686:B3gnt5.3	0.0113306	chr16	19760532	19761532
ENSMUSG00000022747	0.559983	4.47845	1.83752e-06	5.55486e-05	St3gal6	ENSMUSG00000022747	St3gal6	ENSMUSG00000022747:St3gal6.5	0.0125098	chr16	58522926	58523926
ENSMUSG00000022747	0.559983	4.47845	1.83752e-06	5.55486e-05	St3gal6	ENSMUSG00000022747	St3gal6	ENSMUSG00000022747:St3gal6.6	0.0144504	chr16	58522944	58523944
ENSMUSG00000022747	0.559983	4.47845	1.83752e-06	5.55486e-05	St3gal6	ENSMUSG00000022747	St3gal6	ENSMUSG00000022747:St3gal6.9	0.0183624	chr16	58523258	58524258
ENSMUSG00000022747	0.559983	4.47845	1.83752e-06	5.55486e-05	St3gal6	ENSMUSG00000022747	St3gal6	ENSMUSG00000022747:St3gal6.8	0.0202673	chr16	58523224	58524224
ENSMUSG00000037965	0.742522	6.57872	1.71002e-17	1.65948e-15	Zc3h7a	ENSMUSG00000037965	Zc3h7a	ENSMUSG00000037965:Zc3h7a.15	0.0226964	chr16	11175842	11176842
ENSMUSG00000022906	5.21618	6.48965	0	0	Parp9	ENSMUSG00000022906	Parp9	ENSMUSG00000022906:Parp9.3	0.0301421	chr16	35947762	35948762
ENSMUSG00000022747	0.559983	4.47845	1.83752e-06	5.55486e-05	St3gal6	ENSMUSG00000022747	St3gal6	ENSMUSG00000022747:St3gal6.4	0.0390338	chr16	58522844	58523844
ENSMUSG00000000028	0.557031	4.01971	5.77504e-05	0.00130482	Cdc45	ENSMUSG00000000028	Cdc45	ENSMUSG00000000028:Cdc45	0.0408886	chr16	18811091	18812091
ENSMUSG00000037965	0.742522	6.57872	1.71002e-17	1.65948e-15	Zc3h7a	ENSMUSG00000037965	Zc3h7a	ENSMUSG00000037965:Zc3h7a.16	0.0421761	chr16	11175893	11176893
ENSMUSG00000000028	0.557031	4.01971	5.77504e-05	0.00130482	Cdc45	ENSMUSG00000000028	Cdc45	ENSMUSG00000000028:Cdc45.1	0.0430379	chr16	18811126	18812126
ENSMUSG00000022503	0.945205	4.87693	2.00292e-19	2.22208e-17	Nubp1	ENSMUSG00000022503	Nubp1	ENSMUSG00000022503:Nubp1	0.0432838	chr16	10411437	10412437
ENSMUSG00000022503	0.945205	4.87693	2.00292e-19	2.22208e-17	Nubp1	ENSMUSG00000022503	Nubp1	ENSMUSG00000022503:Nubp1.1	0.0437422	chr16	10411542	10412542
ENSMUSG00000022947	0.722242	4.48583	1.5985e-09	7.8227e-08	Cbr3	ENSMUSG00000022947	Cbr3	ENSMUSG00000022947:Cbr3	0.0559908	chr16	93682715	93683715
ENSMUSG00000022747	0.559983	4.47845	1.83752e-06	5.55486e-05	St3gal6	ENSMUSG00000022747	St3gal6	ENSMUSG00000022747:St3gal6.12	0.0591498	chr16	58523685	58524685
ENSMUSG00000000028	0.557031	4.01971	5.77504e-05	0.00130482	Cdc45	ENSMUSG00000000028	Cdc45	ENSMUSG00000000028:Cdc45.2	0.065876	chr16	18811472	18812472
ENSMUSG00000000028	0.557031	4.01971	5.77504e-05	0.00130482	Cdc45	ENSMUSG00000000028	Cdc45	ENSMUSG00000000028:Cdc45.3	0.0665066	chr16	18811487	18812487
ENSMUSG00000013539	0.587432	4.09816	4.63903e-05	0.00107362	Tango2	ENSMUSG00000013539	Tango2	ENSMUSG00000013539:Tango2.12	0.0692154	chr16	18347603	18348603
ENSMUSG00000022686	0.730283	4.5075	6.73631e-10	3.4752e-08	B3gnt5	ENSMUSG00000022686	B3gnt5	ENSMUSG00000022686:B3gnt5.2	0.0692373	chr16	19760064	19761064
ENSMUSG00000013539	0.587432	4.09816	4.63903e-05	0.00107362	Tango2	ENSMUSG00000013539	Tango2	ENSMUSG00000013539:Tango2.11	0.0698166	chr16	18347583	18348583
ENSMUSG00000022747	0.559983	4.47845	1.83752e-06	5.55486e-05	St3gal6	ENSMUSG00000022747	St3gal6	ENSMUSG00000022747:St3gal6.11	0.0829373	chr16	58523669	58524669
ENSMUSG00000074892	0.761177	3.75436	6.56369e-07	2.16616e-05	B3galt5	ENSMUSG00000074892	B3galt5	ENSMUSG00000074892:B3galt5.3	0.0892254	chr16	96280276	96281276
ENSMUSG00000033177	0.80403	1.00787	0.0184232	0.186881	Tmprss7	ENSMUSG00000033177	Tmprss7	ENSMUSG00000033177:Tmprss7.3	0.0895936	chr16	45693158	45694158
ENSMUSG00000039680	0.847265	5.36735	5.24415e-16	4.61849e-14	Mrps6	ENSMUSG00000039680	Mrps6	ENSMUSG00000039680:Mrps6	0.0900446	chr16	92057774	92058774
ENSMUSG00000022505	1.01996	3.81769	6.35164e-11	3.74607e-09	Emp2	ENSMUSG00000022505	Emp2	ENSMUSG00000022505:Emp2	0.0902884	chr16	10313371	10314371
ENSMUSG00000022945	0.996851	4.1613	4.8175e-13	3.38247e-11	Chaf1b	ENSMUSG00000022945	Chaf1b	ENSMUSG00000022945:Chaf1b	0.0911364	chr16	93883394	93884394
ENSMUSG00000022747	0.559983	4.47845	1.83752e-06	5.55486e-05	St3gal6	ENSMUSG00000022747	St3gal6	ENSMUSG00000022747:St3gal6.3	0.0923497	chr16	58513684	58514684
ENSMUSG00000022945	0.996851	4.1613	4.8175e-13	3.38247e-11	Chaf1b	ENSMUSG00000022945	Chaf1b	ENSMUSG00000022945:Chaf1b.2	0.102746	chr16	93883680	93884680
ENSMUSG00000022945	0.996851	4.1613	4.8175e-13	3.38247e-11	Chaf1b	ENSMUSG00000022945	Chaf1b	ENSMUSG00000022945:Chaf1b.1	0.104173	chr16	93883494	93884494
ENSMUSG00000022686	0.730283	4.5075	6.73631e-10	3.4752e-08	B3gnt5	ENSMUSG00000022686	B3gnt5	ENSMUSG00000022686:B3gnt5	0.117397	chr16	19759699	19760699
ENSMUSG00000022500	0.878336	5.01629	1.55406e-16	1.40659e-14	Litaf	ENSMUSG00000022500	Litaf	ENSMUSG00000022500:Litaf.4	0.123206	chr16	11065657	11066657
ENSMUSG00000022505	1.01996	3.81769	6.35164e-11	3.74607e-09	Emp2	ENSMUSG00000022505	Emp2	ENSMUSG00000022505:Emp2.1	0.123668	chr16	10313468	10314468
ENSMUSG00000022686	0.730283	4.5075	6.73631e-10	3.4752e-08	B3gnt5	ENSMUSG00000022686	B3gnt5	ENSMUSG00000022686:B3gnt5.1	0.1238	chr16	19759877	19760877
ENSMUSG00000022500	0.878336	5.01629	1.55406e-16	1.40659e-14	Litaf	ENSMUSG00000022500	Litaf	ENSMUSG00000022500:Litaf.3	0.124025	chr16	11065622	11066622
ENSMUSG00000034206	0.685368	4.52105	3.73996e-08	1.4969e-06	Polq	ENSMUSG00000034206	Polq	ENSMUSG00000034206:Polq	0.126862	chr16	37011278	37012278
ENSMUSG00000074892	0.761177	3.75436	6.56369e-07	2.16616e-05	B3galt5	ENSMUSG00000074892	B3galt5	ENSMUSG00000074892:B3galt5.2	0.129168	chr16	96273089	96274089
ENSMUSG00000022867	0.678915	5.78099	7.07687e-12	4.51773e-10	Usp25	ENSMUSG00000022867	Usp25	ENSMUSG00000022867:Usp25	0.137503	chr16	77013184	77014184
ENSMUSG00000047261	0.916356	6.63685	1.42366e-23	1.96001e-21	Gap43	ENSMUSG00000047261	Gap43	ENSMUSG00000047261:Gap43	0.138254	chr16	42275572	42276572
ENSMUSG00000038055	1.46517	4.71022	2.66604e-34	4.91368e-32	Dexi	ENSMUSG00000038055	Dexi	ENSMUSG00000038055:Dexi.1	0.140284	chr16	10542554	10543554
ENSMUSG00000022867	0.678915	5.78099	7.07687e-12	4.51773e-10	Usp25	ENSMUSG00000022867	Usp25	ENSMUSG00000022867:Usp25.1	0.142831	chr16	77013265	77014265
ENSMUSG00000037965	0.742522	6.57872	1.71002e-17	1.65948e-15	Zc3h7a	ENSMUSG00000037965	Zc3h7a	ENSMUSG00000037965:Zc3h7a.14	0.143845	chr16	11175600	11176600
ENSMUSG00000037965	0.742522	6.57872	1.71002e-17	1.65948e-15	Zc3h7a	ENSMUSG00000037965	Zc3h7a	ENSMUSG00000037965:Zc3h7a.13	0.146085	chr16	11175564	11176564
ENSMUSG00000022971	0.855551	5.092	1.91815e-17	1.84191e-15	Ifnar2	ENSMUSG00000022971	Ifnar2	ENSMUSG00000022971:Ifnar2.1	0.165653	chr16	91372348	91373348
ENSMUSG00000022971	0.855551	5.092	1.91815e-17	1.84191e-15	Ifnar2	ENSMUSG00000022971	Ifnar2	ENSMUSG00000022971:Ifnar2	0.168062	chr16	91372261	91373261
ENSMUSG00000008393	0.540442	6.14488	1.78697e-09	8.71705e-08	Carhsp1	ENSMUSG00000008393	Carhsp1	ENSMUSG00000008393:Carhsp1	0.182575	chr16	8671655	8672655
ENSMUSG00000022747	0.559983	4.47845	1.83752e-06	5.55486e-05	St3gal6	ENSMUSG00000022747	St3gal6	ENSMUSG00000022747:St3gal6.10	0.202537	chr16	58523634	58524634
ENSMUSG00000074892	0.761177	3.75436	6.56369e-07	2.16616e-05	B3galt5	ENSMUSG00000074892	B3galt5	ENSMUSG00000074892:B3galt5.1	0.216357	chr16	96272952	96273952
ENSMUSG00000033177	0.80403	1.00787	0.0184232	0.186881	Tmprss7	ENSMUSG00000033177	Tmprss7	ENSMUSG00000033177:Tmprss7	0.220373	chr16	45684876	45685876
ENSMUSG00000023341	1.92065	3.13931	1.57486e-19	1.7557e-17	Mx2	ENSMUSG00000023341	Mx2	ENSMUSG00000023341:Mx2.1	0.223155	chr16	97535560	97536560
ENSMUSG00000047261	0.916356	6.63685	1.42366e-23	1.96001e-21	Gap43	ENSMUSG00000047261	Gap43	ENSMUSG00000047261:Gap43.1	0.29129	chr16	42340151	42341151
ENSMUSG00000039200	3.33216	-2.09061	0.00012005	0.00252925	Atf7ip2	ENSMUSG00000039200	Atf7ip2	ENSMUSG00000039200:Atf7ip2.1	0.304426	chr16	10192404	10193404
ENSMUSG00000039200	3.33216	-2.09061	0.00012005	0.00252925	Atf7ip2	ENSMUSG00000039200	Atf7ip2	ENSMUSG00000039200:Atf7ip2	0.310715	chr16	10192190	10193190
ENSMUSG00000063445	0.542099	4.33821	1.4112e-05	0.000358352	Nmral1	ENSMUSG00000063445	Nmral1	ENSMUSG00000063445:Nmral1.3	0.311482	chr16	4718856	4719856
ENSMUSG00000063445	0.542099	4.33821	1.4112e-05	0.000358352	Nmral1	ENSMUSG00000063445	Nmral1	ENSMUSG00000063445:Nmral1	0.312735	chr16	4718588	4719588
ENSMUSG00000063445	0.542099	4.33821	1.4112e-05	0.000358352	Nmral1	ENSMUSG00000063445	Nmral1	ENSMUSG00000063445:Nmral1.1	0.314957	chr16	4718608	4719608
ENSMUSG00000063445	0.542099	4.33821	1.4112e-05	0.000358352	Nmral1	ENSMUSG00000063445	Nmral1	ENSMUSG00000063445:Nmral1.2	0.320731	chr16	4718656	4719656
ENSMUSG00000033355	5.87122	5.41147	5.7706e-16	5.06262e-14	Rtp4	ENSMUSG00000033355	Rtp4	ENSMUSG00000033355:Rtp4	0.373631	chr16	23601220	23602220
ENSMUSG00000022747	0.559983	4.47845	1.83752e-06	5.55486e-05	St3gal6	ENSMUSG00000022747	St3gal6	ENSMUSG00000022747:St3gal6	0.383859	chr16	58488925	58489925
ENSMUSG00000022952	3.09524	1.95642	9.63958e-25	1.36834e-22	Runx1	ENSMUSG00000022952	Runx1	ENSMUSG00000022952:Runx1	0.394658	chr16	92694995	92695995
ENSMUSG00000022952	3.09524	1.95642	9.63958e-25	1.36834e-22	Runx1	ENSMUSG00000022952	Runx1	ENSMUSG00000022952:Runx1.1	0.448599	chr16	92695625	92696625
ENSMUSG00000072082	0.634745	5.60412	1.0982e-07	4.12122e-06	Ccnf	ENSMUSG00000072082	Ccnf	ENSMUSG00000072082:Ccnf.6	0.00155079	chr17	24250909	24251909
ENSMUSG00000002307	0.679015	5.13068	3.06619e-11	1.86369e-09	Daxx	ENSMUSG00000002307	Daxx	ENSMUSG00000002307:Daxx	0.00413689	chr17	33908934	33909934
ENSMUSG00000072082	0.634745	5.60412	1.0982e-07	4.12122e-06	Ccnf	ENSMUSG00000072082	Ccnf	ENSMUSG00000072082:Ccnf.7	0.00679558	chr17	24250984	24251984
ENSMUSG00000040490	1.37259	2.74262	1.94444e-10	1.08784e-08	Lrfn2	ENSMUSG00000040490	Lrfn2	ENSMUSG00000040490:Lrfn2	0.00853258	chr17	48931857	48932857
ENSMUSG00000061207	0.70157	3.94342	7.6741e-07	2.50727e-05	Stk19	ENSMUSG00000061207	Stk19	ENSMUSG00000061207:Stk19.3	0.010518	chr17	34835965	34836965
ENSMUSG00000079491	4.49399	2.81024	3.09364e-65	8.94962e-63	H2-T10	ENSMUSG00000079491	H2-T10	ENSMUSG00000079491:H2-T10.1	0.0113444	chr17	36120935	36121935
ENSMUSG00000072082	0.634745	5.60412	1.0982e-07	4.12122e-06	Ccnf	ENSMUSG00000072082	Ccnf	ENSMUSG00000072082:Ccnf.5	0.0143493	chr17	24250847	24251847
ENSMUSG00000079491	4.49399	2.81024	3.09364e-65	8.94962e-63	H2-T10	ENSMUSG00000079491	H2-T10	ENSMUSG00000079491:H2-T10.2	0.0147108	chr17	36120965	36121965
ENSMUSG00000061232	5.84347	8.97472	0	0	H2-K1	ENSMUSG00000061232	H2-K1	ENSMUSG00000061232:H2-K1.6	0.0155838	chr17	33998974	33999974
ENSMUSG00000024014	1.93189	3.42566	1.58976e-23	2.1691e-21	Pim1	ENSMUSG00000024014	Pim1	ENSMUSG00000024014:Pim1.5	0.0162909	chr17	29492885	29493885
ENSMUSG00000024371	4.18886	3.62845	1.96035e-17	1.87848e-15	C2	ENSMUSG00000024371	C2	ENSMUSG00000024371:C2.6	0.0189815	chr17	34897765	34898765
ENSMUSG00000024457	0.840468	5.99514	1.02329e-20	1.20548e-18	Trim26	ENSMUSG00000024457	Trim26	ENSMUSG00000024457:Trim26	0.0195105	chr17	36836637	36837637
ENSMUSG00000001525	0.692231	9.41298	4.50762e-15	3.62736e-13	Tubb5	ENSMUSG00000001525	Tubb5	ENSMUSG00000001525:Tubb5.2	0.0201514	chr17	35837806	35838806
ENSMUSG00000101438	1.22468	1.21161	0.00029575	0.00570146	Gm19412	ENSMUSG00000101438	Gm19412	ENSMUSG00000101438:Gm19412	0.0201584	chr17	33919789	33920789
ENSMUSG00000072082	0.634745	5.60412	1.0982e-07	4.12122e-06	Ccnf	ENSMUSG00000072082	Ccnf	ENSMUSG00000072082:Ccnf.4	0.0219472	chr17	24250818	24251818
ENSMUSG00000024098	0.99758	6.23119	1.07198e-29	1.83514e-27	Twsg1	ENSMUSG00000024098	Twsg1	ENSMUSG00000024098:Twsg1.3	0.0248589	chr17	65950726	65951726
ENSMUSG00000047407	0.613851	1.91135	0.0311798	0.278244	Tgif1	ENSMUSG00000047407	Tgif1	ENSMUSG00000047407:Tgif1.2	0.0260682	chr17	70849144	70850144
ENSMUSG00000079491	4.49399	2.81024	3.09364e-65	8.94962e-63	H2-T10	ENSMUSG00000079491	H2-T10	ENSMUSG00000079491:H2-T10	0.0268421	chr17	36120649	36121649
ENSMUSG00000023940	0.531817	4.22248	5.24981e-05	0.00119919	Sgo1	ENSMUSG00000023940	Sgo1	ENSMUSG00000023940:Sgo1.1	0.0274926	chr17	53688833	53689833
ENSMUSG00000002307	0.679015	5.13068	3.06619e-11	1.86369e-09	Daxx	ENSMUSG00000002307	Daxx	ENSMUSG00000002307:Daxx.1	0.0284625	chr17	33909079	33910079
ENSMUSG00000056116	4.14185	7.35867	0	0	H2-T22	ENSMUSG00000056116	H2-T22	ENSMUSG00000056116:H2-T22	0.0290392	chr17	36042000	36043000
ENSMUSG00000001525	0.692231	9.41298	4.50762e-15	3.62736e-13	Tubb5	ENSMUSG00000001525	Tubb5	ENSMUSG00000001525:Tubb5.1	0.0330069	chr17	35837713	35838713
ENSMUSG00000023940	0.531817	4.22248	5.24981e-05	0.00119919	Sgo1	ENSMUSG00000023940	Sgo1	ENSMUSG00000023940:Sgo1	0.0334663	chr17	53688782	53689782
ENSMUSG00000062753	0.581779	2.9953	0.00231381	0.0341821	Smim29	ENSMUSG00000062753	AI413582	ENSMUSG00000062753:AI413582.3	0.0361712	chr17	27565253	27566253
ENSMUSG00000062753	0.581779	2.9953	0.00231381	0.0341821	Smim29	ENSMUSG00000062753	AI413582	ENSMUSG00000062753:AI413582.2	0.0393922	chr17	27565217	27566217
ENSMUSG00000024339	4.71533	6.77473	0	0	Tap2	ENSMUSG00000024339	Tap2	ENSMUSG00000024339:Tap2.3	0.0397171	chr17	34204578	34205578
ENSMUSG00000061607	0.646335	6.91187	3.62409e-15	2.94227e-13	Mdc1	ENSMUSG00000061607	Mdc1	ENSMUSG00000061607:Mdc1	0.042903	chr17	35840993	35841993
ENSMUSG00000061607	0.646335	6.91187	3.62409e-15	2.94227e-13	Mdc1	ENSMUSG00000061607	Mdc1	ENSMUSG00000061607:Mdc1.1	0.0429193	chr17	35841154	35842154
ENSMUSG00000062753	0.581779	2.9953	0.00231381	0.0341821	Smim29	ENSMUSG00000062753	AI413582	ENSMUSG00000062753:AI413582.1	0.0471217	chr17	27565171	27566171
ENSMUSG00000098090	0.533335	2.8677	0.0109742	0.12358	2700099C18Rik	ENSMUSG00000098090	2700099C18Rik	ENSMUSG00000098090:2700099C18Rik	0.0475499	chr17	94749597	94750597
ENSMUSG00000007036	0.9482	5.73924	2.62396e-24	3.66776e-22	Abhd16a	ENSMUSG00000007036	Abhd16a	ENSMUSG00000007036:Abhd16a	0.0487496	chr17	35088766	35089766
ENSMUSG00000024371	4.18886	3.62845	1.96035e-17	1.87848e-15	C2	ENSMUSG00000024371	C2	ENSMUSG00000024371:C2.5	0.0493572	chr17	34895052	34896052
ENSMUSG00000056116	4.14185	7.35867	0	0	H2-T22	ENSMUSG00000056116	H2-T22	ENSMUSG00000056116:H2-T22.1	0.049555	chr17	36042187	36043187
ENSMUSG00000047407	0.613851	1.91135	0.0311798	0.278244	Tgif1	ENSMUSG00000047407	Tgif1	ENSMUSG00000047407:Tgif1.4	0.0503593	chr17	70849311	70850311
ENSMUSG00000024014	1.93189	3.42566	1.58976e-23	2.1691e-21	Pim1	ENSMUSG00000024014	Pim1	ENSMUSG00000024014:Pim1	0.0507566	chr17	29490231	29491231
ENSMUSG00000056116	4.14185	7.35867	0	0	H2-T22	ENSMUSG00000056116	H2-T22	ENSMUSG00000056116:H2-T22.2	0.0523017	chr17	36042205	36043205
ENSMUSG00000024429	0.508794	5.93744	1.64972e-08	6.8643e-07	Gnl1	ENSMUSG00000024429	Gnl1	ENSMUSG00000024429:Gnl1	0.052347	chr17	35979329	35980329
ENSMUSG00000098164	3.77895	-3.7277	0.0384903	0.322201	Gm5493	ENSMUSG00000098164	Gm5493	ENSMUSG00000098164:Gm5493	0.0553203	chr17	22739423	22740423
ENSMUSG00000024165	0.640447	6.22875	2.93431e-13	2.12217e-11	Jpt2	ENSMUSG00000024165	Jpt2	ENSMUSG00000024165:Jpt2.2	0.0568412	chr17	24960189	24961189
ENSMUSG00000024165	0.640447	6.22875	2.93431e-13	2.12217e-11	Jpt2	ENSMUSG00000024165	Jpt2	ENSMUSG00000024165:Jpt2.1	0.0575216	chr17	24960169	24961169
ENSMUSG00000024014	1.93189	3.42566	1.58976e-23	2.1691e-21	Pim1	ENSMUSG00000024014	Pim1	ENSMUSG00000024014:Pim1.2	0.0575869	chr17	29490783	29491783
ENSMUSG00000056116	4.14185	7.35867	0	0	H2-T22	ENSMUSG00000056116	H2-T22	ENSMUSG00000056116:H2-T22.3	0.0578277	chr17	36042247	36043247
ENSMUSG00000061207	0.70157	3.94342	7.6741e-07	2.50727e-05	Stk19	ENSMUSG00000061207	Stk19	ENSMUSG00000061207:Stk19.4	0.0586338	chr17	34836254	34837254
ENSMUSG00000024165	0.640447	6.22875	2.93431e-13	2.12217e-11	Jpt2	ENSMUSG00000024165	Jpt2	ENSMUSG00000024165:Jpt2	0.0587288	chr17	24960141	24961141
ENSMUSG00000061207	0.70157	3.94342	7.6741e-07	2.50727e-05	Stk19	ENSMUSG00000061207	Stk19	ENSMUSG00000061207:Stk19.7	0.0587667	chr17	34836445	34837445
ENSMUSG00000061207	0.70157	3.94342	7.6741e-07	2.50727e-05	Stk19	ENSMUSG00000061207	Stk19	ENSMUSG00000061207:Stk19.6	0.0626993	chr17	34836427	34837427
ENSMUSG00000047407	0.613851	1.91135	0.0311798	0.278244	Tgif1	ENSMUSG00000047407	Tgif1	ENSMUSG00000047407:Tgif1.3	0.0648142	chr17	70849290	70850290
ENSMUSG00000061207	0.70157	3.94342	7.6741e-07	2.50727e-05	Stk19	ENSMUSG00000061207	Stk19	ENSMUSG00000061207:Stk19.5	0.0655352	chr17	34836367	34837367
ENSMUSG00000092277	9.79595	0.710257	8.74978e-31	1.52067e-28	Gm19684	ENSMUSG00000092277	Gm19684	ENSMUSG00000092277:Gm19684	0.0709912	chr17	36121156	36122156
ENSMUSG00000023947	0.559715	3.16257	0.0108247	0.122076	Nfkbie	ENSMUSG00000023947	Nfkbie	ENSMUSG00000023947:Nfkbie	0.0715114	chr17	45555199	45556199
ENSMUSG00000023873	0.815533	0.868928	0.0199331	0.199192	1700010I14Rik	ENSMUSG00000023873	1700010I14Rik	ENSMUSG00000023873:1700010I14Rik	0.0776277	chr17	8987836	8988836
ENSMUSG00000096549	7.54086	-1.71108	5.83851e-10	3.03948e-08	Prickle4	ENSMUSG00000096549	Prickle4	ENSMUSG00000096549:Prickle4.4	0.0787603	chr17	47694236	47695236
ENSMUSG00000057789	0.562295	6.7233	1.41827e-07	5.21949e-06	Bak1	ENSMUSG00000057789	Bak1	ENSMUSG00000057789:Bak1	0.081517	chr17	27028083	27029083
ENSMUSG00000057789	0.562295	6.7233	1.41827e-07	5.21949e-06	Bak1	ENSMUSG00000057789	Bak1	ENSMUSG00000057789:Bak1.1	0.0883121	chr17	27028194	27029194
ENSMUSG00000036552	1.21288	6.27828	1.22146e-42	2.66213e-40	Ermard	ENSMUSG00000036552	Ermard	ENSMUSG00000036552:Ermard.11	0.0883264	chr17	15065093	15066093
ENSMUSG00000057789	0.562295	6.7233	1.41827e-07	5.21949e-06	Bak1	ENSMUSG00000057789	Bak1	ENSMUSG00000057789:Bak1.2	0.0968321	chr17	27028509	27029509
ENSMUSG00000101438	1.22468	1.21161	0.00029575	0.00570146	Gm19412	ENSMUSG00000101438	Gm19412	ENSMUSG00000101438:Gm19412.1	0.0991585	chr17	33919985	33920985
ENSMUSG00000024308	4.69612	7.65892	0	0	Tapbp	ENSMUSG00000024308	Tapbp	ENSMUSG00000024308:Tapbp.5	0.100056	chr17	33920005	33921005
ENSMUSG00000024019	0.879091	6.70252	2.34753e-25	3.41722e-23	Cmtr1	ENSMUSG00000024019	Cmtr1	ENSMUSG00000024019:Cmtr1.6	0.108402	chr17	29679924	29680924
ENSMUSG00000061232	5.84347	8.97472	0	0	H2-K1	ENSMUSG00000061232	H2-K1	ENSMUSG00000061232:H2-K1.5	0.110011	chr17	33998827	33999827
ENSMUSG00000024098	0.99758	6.23119	1.07198e-29	1.83514e-27	Twsg1	ENSMUSG00000024098	Twsg1	ENSMUSG00000024098:Twsg1.2	0.115101	chr17	65950637	65951637
ENSMUSG00000040276	1.71759	1.65008	6.94279e-09	3.09903e-07	Pacsin1	ENSMUSG00000040276	Pacsin1	ENSMUSG00000040276:Pacsin1.1	0.115856	chr17	27684688	27685688
ENSMUSG00000024098	0.99758	6.23119	1.07198e-29	1.83514e-27	Twsg1	ENSMUSG00000024098	Twsg1	ENSMUSG00000024098:Twsg1.1	0.116479	chr17	65950615	65951615
ENSMUSG00000024014	1.93189	3.42566	1.58976e-23	2.1691e-21	Pim1	ENSMUSG00000024014	Pim1	ENSMUSG00000024014:Pim1.1	0.125945	chr17	29490634	29491634
ENSMUSG00000046711	0.800887	6.60403	4.8908e-17	4.56222e-15	Hmga1	ENSMUSG00000046711	Hmga1	ENSMUSG00000046711:Hmga1.1	0.129867	chr17	27556112	27557112
ENSMUSG00000036533	0.613473	2.00699	0.0175689	0.179933	Cdc42ep3	ENSMUSG00000036533	Cdc42ep3	ENSMUSG00000036533:Cdc42ep3.1	0.134318	chr17	79354591	79355591
ENSMUSG00000073407	7.31179	-1.64647	1.0305e-09	5.21617e-08	Gm6034	ENSMUSG00000073407	Gm6034	ENSMUSG00000073407:Gm6034	0.136389	chr17	36042439	36043439
ENSMUSG00000024308	4.69612	7.65892	0	0	Tapbp	ENSMUSG00000024308	Tapbp	ENSMUSG00000024308:Tapbp	0.13809	chr17	33915379	33916379
ENSMUSG00000061607	0.646335	6.91187	3.62409e-15	2.94227e-13	Mdc1	ENSMUSG00000061607	Mdc1	ENSMUSG00000061607:Mdc1.2	0.149911	chr17	35847979	35848979
ENSMUSG00000061232	5.84347	8.97472	0	0	H2-K1	ENSMUSG00000061232	H2-K1	ENSMUSG00000061232:H2-K1.7	0.153078	chr17	33999184	34000184
ENSMUSG00000024429	0.508794	5.93744	1.64972e-08	6.8643e-07	Gnl1	ENSMUSG00000024429	Gnl1	ENSMUSG00000024429:Gnl1.1	0.155771	chr17	35979866	35980866
ENSMUSG00000104159	3.77895	-3.7277	0.0384903	0.322201	Gm38099	ENSMUSG00000104159	Gm38099	ENSMUSG00000104159:Gm38099	0.159663	chr17	31534960	31535960
ENSMUSG00000046711	0.800887	6.60403	4.8908e-17	4.56222e-15	Hmga1	ENSMUSG00000046711	Hmga1	ENSMUSG00000046711:Hmga1	0.160284	chr17	27555975	27556975
ENSMUSG00000097405	4.62086	-3.60156	0.0105407	0.119611	D630044L22Rik	ENSMUSG00000097405	D630044L22Rik	ENSMUSG00000097405:D630044L22Rik	0.164554	chr17	25950950	25951950
ENSMUSG00000024036	1.4843	0.888933	2.74877e-05	0.000664063	Slc37a1	ENSMUSG00000024036	Slc37a1	ENSMUSG00000024036:Slc37a1.5	0.166623	chr17	31296469	31297469
ENSMUSG00000050410	0.638087	4.48886	6.3433e-08	2.45711e-06	Tcf19	ENSMUSG00000050410	Tcf19	ENSMUSG00000050410:Tcf19	0.167682	chr17	35516047	35517047
ENSMUSG00000024043	1.2701	1.02708	0.000397314	0.00742151	Arhgap28	ENSMUSG00000024043	Arhgap28	ENSMUSG00000024043:Arhgap28.4	0.171858	chr17	68003620	68004620
ENSMUSG00000007036	0.9482	5.73924	2.62396e-24	3.66776e-22	Abhd16a	ENSMUSG00000007036	Abhd16a	ENSMUSG00000007036:Abhd16a.1	0.173278	chr17	35089348	35090348
ENSMUSG00000024338	9.14327	7.11375	0	0	Psmb8	ENSMUSG00000024338	Psmb8	ENSMUSG00000024338:Psmb8.4	0.174032	chr17	34198832	34199832
ENSMUSG00000024301	0.540605	3.88958	0.00129601	0.0207925	Kifc5b	ENSMUSG00000024301	Kifc5b	ENSMUSG00000024301:Kifc5b	0.175278	chr17	26916610	26917610
ENSMUSG00000024019	0.879091	6.70252	2.34753e-25	3.41722e-23	Cmtr1	ENSMUSG00000024019	Cmtr1	ENSMUSG00000024019:Cmtr1	0.177486	chr17	29660086	29661086
ENSMUSG00000024014	1.93189	3.42566	1.58976e-23	2.1691e-21	Pim1	ENSMUSG00000024014	Pim1	ENSMUSG00000024014:Pim1.4	0.179768	chr17	29492515	29493515
ENSMUSG00000023912	0.505564	3.62189	0.00273577	0.0391138	Slc25a27	ENSMUSG00000023912	Slc25a27	ENSMUSG00000023912:Slc25a27	0.187127	chr17	43666632	43667632
ENSMUSG00000037649	5.00431	5.63023	0	0	H2-DMa	ENSMUSG00000037649	H2-DMa	ENSMUSG00000037649:H2-DMa.1	0.188969	chr17	34122312	34123312
ENSMUSG00000024338	9.14327	7.11375	0	0	Psmb8	ENSMUSG00000024338	Psmb8	ENSMUSG00000024338:Psmb8	0.189565	chr17	34197199	34198199
ENSMUSG00000023908	0.895058	4.04032	8.53434e-11	4.9756e-09	Pkmyt1	ENSMUSG00000023908	Pkmyt1	ENSMUSG00000023908:Pkmyt1	0.190457	chr17	23725820	23726820
ENSMUSG00000024019	0.879091	6.70252	2.34753e-25	3.41722e-23	Cmtr1	ENSMUSG00000024019	Cmtr1	ENSMUSG00000024019:Cmtr1.1	0.192304	chr17	29660199	29661199
ENSMUSG00000023912	0.505564	3.62189	0.00273577	0.0391138	Slc25a27	ENSMUSG00000023912	Slc25a27	ENSMUSG00000023912:Slc25a27.1	0.196438	chr17	43666714	43667714
ENSMUSG00000023963	1.08258	3.28681	3.78053e-09	1.77231e-07	Cyp39a1	ENSMUSG00000023963	Cyp39a1	ENSMUSG00000023963:Cyp39a1	0.2002	chr17	43666903	43667903
ENSMUSG00000024019	0.879091	6.70252	2.34753e-25	3.41722e-23	Cmtr1	ENSMUSG00000024019	Cmtr1	ENSMUSG00000024019:Cmtr1.2	0.200279	chr17	29660285	29661285
ENSMUSG00000095193	1.06897	0.301295	0.00845097	0.100085	Gm20939	ENSMUSG00000095193	Gm20939	ENSMUSG00000095193:Gm20939	0.200671	chr17	94864396	94865396
ENSMUSG00000087478	1.16042	-0.568631	0.0148184	0.157151	4930506C21Rik	ENSMUSG00000087478	4930506C21Rik	ENSMUSG00000087478:4930506C21Rik	0.203079	chr17	8297916	8298916
ENSMUSG00000040312	0.822506	3.13162	9.70462e-06	0.000253909	Cchcr1	ENSMUSG00000040312	Cchcr1	ENSMUSG00000040312:Cchcr1.1	0.221408	chr17	35516654	35517654
ENSMUSG00000040312	0.822506	3.13162	9.70462e-06	0.000253909	Cchcr1	ENSMUSG00000040312	Cchcr1	ENSMUSG00000040312:Cchcr1	0.228294	chr17	35516586	35517586
ENSMUSG00000001228	0.794283	6.89893	8.40037e-22	1.05485e-19	Uhrf1	ENSMUSG00000001228	Uhrf1	ENSMUSG00000001228:Uhrf1.3	0.230298	chr17	56303885	56304885
ENSMUSG00000050410	0.638087	4.48886	6.3433e-08	2.45711e-06	Tcf19	ENSMUSG00000050410	Tcf19	ENSMUSG00000050410:Tcf19.1	0.230928	chr17	35516285	35517285
ENSMUSG00000001228	0.794283	6.89893	8.40037e-22	1.05485e-19	Uhrf1	ENSMUSG00000001228	Uhrf1	ENSMUSG00000001228:Uhrf1.2	0.231788	chr17	56303808	56304808
ENSMUSG00000023908	0.895058	4.04032	8.53434e-11	4.9756e-09	Pkmyt1	ENSMUSG00000023908	Pkmyt1	ENSMUSG00000023908:Pkmyt1.1	0.232374	chr17	23725965	23726965
ENSMUSG00000067942	0.872736	5.04768	1.25289e-16	1.13851e-14	Zfp160	ENSMUSG00000067942	Zfp160	ENSMUSG00000067942:Zfp160	0.233475	chr17	21008451	21009451
ENSMUSG00000023963	1.08258	3.28681	3.78053e-09	1.77231e-07	Cyp39a1	ENSMUSG00000023963	Cyp39a1	ENSMUSG00000023963:Cyp39a1.1	0.235124	chr17	43666995	43667995
ENSMUSG00000050410	0.638087	4.48886	6.3433e-08	2.45711e-06	Tcf19	ENSMUSG00000050410	Tcf19	ENSMUSG00000050410:Tcf19.2	0.236507	chr17	35516322	35517322
ENSMUSG00000002835	0.675449	5.32542	8.11049e-12	5.12036e-10	Chaf1a	ENSMUSG00000002835	Chaf1a	ENSMUSG00000002835:Chaf1a	0.240536	chr17	56039917	56040917
ENSMUSG00000069743	0.637125	1.73817	0.0253372	0.239032	Zfp820	ENSMUSG00000069743	Zfp820	ENSMUSG00000069743:Zfp820	0.250117	chr17	21845259	21846259
ENSMUSG00000037649	5.00431	5.63023	0	0	H2-DMa	ENSMUSG00000037649	H2-DMa	ENSMUSG00000037649:H2-DMa	0.250785	chr17	34119042	34120042
ENSMUSG00000069743	0.637125	1.73817	0.0253372	0.239032	Zfp820	ENSMUSG00000069743	Zfp820	ENSMUSG00000069743:Zfp820.1	0.252891	chr17	21845272	21846272
ENSMUSG00000062753	0.581779	2.9953	0.00231381	0.0341821	Smim29	ENSMUSG00000062753	AI413582	ENSMUSG00000062753:AI413582	0.254109	chr17	27564623	27565623
ENSMUSG00000073411	5.59848	9.16877	0	0	H2-D1	ENSMUSG00000073411	H2-D1	ENSMUSG00000073411:H2-D1.1	0.26416	chr17	35262574	35263574
ENSMUSG00000024338	9.14327	7.11375	0	0	Psmb8	ENSMUSG00000024338	Psmb8	ENSMUSG00000024338:Psmb8.1	0.277543	chr17	34197268	34198268
ENSMUSG00000096727	8.77547	6.51265	0	0	Psmb9	ENSMUSG00000096727	Psmb9	ENSMUSG00000096727:Psmb9.2	0.289321	chr17	34186719	34187719
ENSMUSG00000037649	5.00431	5.63023	0	0	H2-DMa	ENSMUSG00000037649	H2-DMa	ENSMUSG00000037649:H2-DMa.2	0.296472	chr17	34135119	34136119
ENSMUSG00000073405	2.82373	-0.253943	4.26805e-08	1.6905e-06	H2-T-ps	ENSMUSG00000073405	H2-T-ps	ENSMUSG00000073405:H2-T-ps	0.297179	chr17	36111158	36112158
ENSMUSG00000059142	0.768691	5.58355	1.43075e-15	1.20658e-13	Zfp945	ENSMUSG00000059142	Zfp945	ENSMUSG00000059142:Zfp945.2	0.307427	chr17	22866634	22867634
ENSMUSG00000059142	0.768691	5.58355	1.43075e-15	1.20658e-13	Zfp945	ENSMUSG00000059142	Zfp945	ENSMUSG00000059142:Zfp945.1	0.311795	chr17	22866605	22867605
ENSMUSG00000024155	6.95711	-1.92583	3.73519e-08	1.4969e-06	Meiob	ENSMUSG00000024155	Meiob	ENSMUSG00000024155:Meiob	0.31741	chr17	24803802	24804802
ENSMUSG00000040312	0.822506	3.13162	9.70462e-06	0.000253909	Cchcr1	ENSMUSG00000040312	Cchcr1	ENSMUSG00000040312:Cchcr1.2	0.326771	chr17	35516941	35517941
ENSMUSG00000038311	4.88632	-3.27818	0.00284222	0.0402856	2410017I17Rik	ENSMUSG00000038311	2410017I17Rik	ENSMUSG00000038311:2410017I17Rik	0.329327	chr17	36144496	36145496
ENSMUSG00000023959	1.28108	1.402	0.000679569	0.0118511	Clic5	ENSMUSG00000023959	Clic5	ENSMUSG00000023959:Clic5.1	0.330386	chr17	44188062	44189062
ENSMUSG00000073411	5.59848	9.16877	0	0	H2-D1	ENSMUSG00000073411	H2-D1	ENSMUSG00000073411:H2-D1	0.332486	chr17	35262208	35263208
ENSMUSG00000024036	1.4843	0.888933	2.74877e-05	0.000664063	Slc37a1	ENSMUSG00000024036	Slc37a1	ENSMUSG00000024036:Slc37a1.4	0.337949	chr17	31295845	31296845
ENSMUSG00000095407	1.07254	1.9198	0.000120077	0.00252925	Tmem200c	ENSMUSG00000095407	Tmem200c	ENSMUSG00000095407:Tmem200c.1	0.338219	chr17	68836614	68837614
ENSMUSG00000024014	1.93189	3.42566	1.58976e-23	2.1691e-21	Pim1	ENSMUSG00000024014	Pim1	ENSMUSG00000024014:Pim1.3	0.346327	chr17	29491684	29492684
ENSMUSG00000047407	0.613851	1.91135	0.0311798	0.278244	Tgif1	ENSMUSG00000047407	Tgif1	ENSMUSG00000047407:Tgif1.9	0.350506	chr17	70853046	70854046
ENSMUSG00000040276	1.71759	1.65008	6.94279e-09	3.09903e-07	Pacsin1	ENSMUSG00000040276	Pacsin1	ENSMUSG00000040276:Pacsin1	0.351722	chr17	27655026	27656026
ENSMUSG00000024339	4.71533	6.77473	0	0	Tap2	ENSMUSG00000024339	Tap2	ENSMUSG00000024339:Tap2.2	0.35559	chr17	34204045	34205045
ENSMUSG00000096727	8.77547	6.51265	0	0	Psmb9	ENSMUSG00000096727	Psmb9	ENSMUSG00000096727:Psmb9.6	0.360202	chr17	34187264	34188264
ENSMUSG00000037321	6.25514	8.06302	8.28008e-143	3.6391e-140	Tap1	ENSMUSG00000037321	Tap1	ENSMUSG00000037321:Tap1.2	0.361575	chr17	34187280	34188280
ENSMUSG00000037321	6.25514	8.06302	8.28008e-143	3.6391e-140	Tap1	ENSMUSG00000037321	Tap1	ENSMUSG00000037321:Tap1.1	0.364651	chr17	34187209	34188209
ENSMUSG00000024371	4.18886	3.62845	1.96035e-17	1.87848e-15	C2	ENSMUSG00000024371	C2	ENSMUSG00000024371:C2.1	0.371167	chr17	34864452	34865452
ENSMUSG00000096727	8.77547	6.51265	0	0	Psmb9	ENSMUSG00000096727	Psmb9	ENSMUSG00000096727:Psmb9.3	0.375174	chr17	34186838	34187838
ENSMUSG00000037321	6.25514	8.06302	8.28008e-143	3.6391e-140	Tap1	ENSMUSG00000037321	Tap1	ENSMUSG00000037321:Tap1	0.375928	chr17	34187031	34188031
ENSMUSG00000096727	8.77547	6.51265	0	0	Psmb9	ENSMUSG00000096727	Psmb9	ENSMUSG00000096727:Psmb9.4	0.376415	chr17	34186853	34187853
ENSMUSG00000096727	8.77547	6.51265	0	0	Psmb9	ENSMUSG00000096727	Psmb9	ENSMUSG00000096727:Psmb9.5	0.378752	chr17	34186865	34187865
ENSMUSG00000023908	0.895058	4.04032	8.53434e-11	4.9756e-09	Pkmyt1	ENSMUSG00000023908	Pkmyt1	ENSMUSG00000023908:Pkmyt1.2	0.384091	chr17	23734205	23735205
ENSMUSG00000016206	4.90671	3.46609	2.29567e-106	8.53092e-104	H2-M3	ENSMUSG00000016206	H2-M3	ENSMUSG00000016206:H2-M3	0.398456	chr17	37269698	37270698
ENSMUSG00000047407	0.613851	1.91135	0.0311798	0.278244	Tgif1	ENSMUSG00000047407	Tgif1	ENSMUSG00000047407:Tgif1.5	0.398464	chr17	70850569	70851569
ENSMUSG00000024339	4.71533	6.77473	0	0	Tap2	ENSMUSG00000024339	Tap2	ENSMUSG00000024339:Tap2.1	0.398881	chr17	34203558	34204558
ENSMUSG00000047407	0.613851	1.91135	0.0311798	0.278244	Tgif1	ENSMUSG00000047407	Tgif1	ENSMUSG00000047407:Tgif1.6	0.401631	chr17	70850631	70851631
ENSMUSG00000087478	1.16042	-0.568631	0.0148184	0.157151	4930506C21Rik	ENSMUSG00000087478	4930506C21Rik	ENSMUSG00000087478:4930506C21Rik.2	0.404529	chr17	8310580	8311580
ENSMUSG00000087478	1.16042	-0.568631	0.0148184	0.157151	4930506C21Rik	ENSMUSG00000087478	4930506C21Rik	ENSMUSG00000087478:4930506C21Rik.1	0.405842	chr17	8310552	8311552
ENSMUSG00000073421	8.20634	7.00431	0	0	H2-Ab1	ENSMUSG00000073421	H2-Ab1	ENSMUSG00000073421:H2-Ab1.2	0.411902	chr17	34262809	34263809
ENSMUSG00000073421	8.20634	7.00431	0	0	H2-Ab1	ENSMUSG00000073421	H2-Ab1	ENSMUSG00000073421:H2-Ab1.1	0.415735	chr17	34262713	34263713
ENSMUSG00000002668	4.30333	-3.60163	0.0144074	0.153612	Dennd1c	ENSMUSG00000002668	Dennd1c	ENSMUSG00000002668:Dennd1c.3	0.418805	chr17	57077939	57078939
ENSMUSG00000040680	4.19603	-1.68149	1.25889e-06	3.94661e-05	Kremen2	ENSMUSG00000040680	Kremen2	ENSMUSG00000040680:Kremen2	0.427194	chr17	23745333	23746333
ENSMUSG00000024036	1.4843	0.888933	2.74877e-05	0.000664063	Slc37a1	ENSMUSG00000024036	Slc37a1	ENSMUSG00000024036:Slc37a1.3	0.429745	chr17	31295687	31296687
ENSMUSG00000073406	4.93322	-3.48554	0.00517954	0.067034	H2-Bl	ENSMUSG00000073406	H2-Bl	ENSMUSG00000073406:H2-Bl.2	0.429913	chr17	36083723	36084723
ENSMUSG00000002668	4.30333	-3.60163	0.0144074	0.153612	Dennd1c	ENSMUSG00000002668	Dennd1c	ENSMUSG00000002668:Dennd1c.4	0.43192	chr17	57077953	57078953
ENSMUSG00000047407	0.613851	1.91135	0.0311798	0.278244	Tgif1	ENSMUSG00000047407	Tgif1	ENSMUSG00000047407:Tgif1.7	0.44753	chr17	70850707	70851707
ENSMUSG00000061232	5.84347	8.97472	0	0	H2-K1	ENSMUSG00000061232	H2-K1	ENSMUSG00000061232:H2-K1.10	0.44959	chr17	33999785	34000785
ENSMUSG00000061232	5.84347	8.97472	0	0	H2-K1	ENSMUSG00000061232	H2-K1	ENSMUSG00000061232:H2-K1.9	0.451735	chr17	33999754	34000754
ENSMUSG00000061232	5.84347	8.97472	0	0	H2-K1	ENSMUSG00000061232	H2-K1	ENSMUSG00000061232:H2-K1.11	0.452667	chr17	33999805	34000805
ENSMUSG00000061232	5.84347	8.97472	0	0	H2-K1	ENSMUSG00000061232	H2-K1	ENSMUSG00000061232:H2-K1.8	0.454785	chr17	33999708	34000708
ENSMUSG00000061232	5.84347	8.97472	0	0	H2-K1	ENSMUSG00000061232	H2-K1	ENSMUSG00000061232:H2-K1.12	0.457173	chr17	33999847	34000847
ENSMUSG00000073406	4.93322	-3.48554	0.00517954	0.067034	H2-Bl	ENSMUSG00000073406	H2-Bl	ENSMUSG00000073406:H2-Bl.1	0.457529	chr17	36083693	36084693
ENSMUSG00000024036	1.4843	0.888933	2.74877e-05	0.000664063	Slc37a1	ENSMUSG00000024036	Slc37a1	ENSMUSG00000024036:Slc37a1.7	0.480977	chr17	31305021	31306021
ENSMUSG00000002668	4.30333	-3.60163	0.0144074	0.153612	Dennd1c	ENSMUSG00000002668	Dennd1c	ENSMUSG00000002668:Dennd1c.5	0.499922	chr17	57078012	57079012
ENSMUSG00000003779	0.768523	6.04397	2.48419e-16	2.2091e-14	Kif20a	ENSMUSG00000003779	Kif20a	ENSMUSG00000003779:Kif20a	0.00250742	chr18	34624091	34625091
ENSMUSG00000045991	0.693027	2.14915	0.00513111	0.066553	Onecut2	ENSMUSG00000045991	Onecut2	ENSMUSG00000045991:Onecut2	0.00425997	chr18	64339498	64340498
ENSMUSG00000003779	0.768523	6.04397	2.48419e-16	2.2091e-14	Kif20a	ENSMUSG00000003779	Kif20a	ENSMUSG00000003779:Kif20a.2	0.0112447	chr18	34624498	34625498
ENSMUSG00000024617	0.864686	2.44692	0.000193647	0.00388894	Camk2a	ENSMUSG00000024617	Camk2a	ENSMUSG00000024617:Camk2a.3	0.0206989	chr18	60963055	60964055
ENSMUSG00000003779	0.768523	6.04397	2.48419e-16	2.2091e-14	Kif20a	ENSMUSG00000003779	Kif20a	ENSMUSG00000003779:Kif20a.1	0.0268174	chr18	34624213	34625213
ENSMUSG00000024231	0.539625	6.33275	1.47795e-09	7.2874e-08	Cul2	ENSMUSG00000024231	Cul2	ENSMUSG00000024231:Cul2.1	0.0303078	chr18	3382746	3383746
ENSMUSG00000097755	0.856712	0.746018	0.0169329	0.174679	2010110K18Rik	ENSMUSG00000097755	2010110K18Rik	ENSMUSG00000097755:2010110K18Rik	0.0362616	chr18	34751287	34752287
ENSMUSG00000097755	0.856712	0.746018	0.0169329	0.174679	2010110K18Rik	ENSMUSG00000097755	2010110K18Rik	ENSMUSG00000097755:2010110K18Rik.1	0.0366611	chr18	34751390	34752390
ENSMUSG00000038059	0.918817	2.29851	0.00289903	0.0409443	Smim3	ENSMUSG00000038059	Smim3	ENSMUSG00000038059:Smim3.1	0.0509378	chr18	60501487	60502487
ENSMUSG00000024231	0.539625	6.33275	1.47795e-09	7.2874e-08	Cul2	ENSMUSG00000024231	Cul2	ENSMUSG00000024231:Cul2	0.0530715	chr18	3382466	3383466
ENSMUSG00000044201	0.52651	4.36303	3.21894e-05	0.000767509	Cdc25c	ENSMUSG00000044201	Cdc25c	ENSMUSG00000044201:Cdc25c.4	0.0568797	chr18	34751029	34752029
ENSMUSG00000044201	0.52651	4.36303	3.21894e-05	0.000767509	Cdc25c	ENSMUSG00000044201	Cdc25c	ENSMUSG00000044201:Cdc25c.3	0.0574646	chr18	34751008	34752008
ENSMUSG00000062526	0.514273	2.40237	0.0267006	0.24912	Mppe1	ENSMUSG00000062526	Mppe1	ENSMUSG00000062526:Mppe1.1	0.0608994	chr18	67244941	67245941
ENSMUSG00000062526	0.514273	2.40237	0.0267006	0.24912	Mppe1	ENSMUSG00000062526	Mppe1	ENSMUSG00000062526:Mppe1.3	0.0697655	chr18	67245330	67246330
ENSMUSG00000062526	0.514273	2.40237	0.0267006	0.24912	Mppe1	ENSMUSG00000062526	Mppe1	ENSMUSG00000062526:Mppe1.2	0.0704055	chr18	67245167	67246167
ENSMUSG00000038059	0.918817	2.29851	0.00289903	0.0409443	Smim3	ENSMUSG00000038059	Smim3	ENSMUSG00000038059:Smim3	0.0768004	chr18	60501076	60502076
ENSMUSG00000062526	0.514273	2.40237	0.0267006	0.24912	Mppe1	ENSMUSG00000062526	Mppe1	ENSMUSG00000062526:Mppe1	0.0795778	chr18	67244777	67245777
ENSMUSG00000063889	2.23247	4.00851	5.36076e-52	1.31736e-49	Crem	ENSMUSG00000063889	Crem	ENSMUSG00000063889:Crem.14	0.0960499	chr18	3336563	3337563
ENSMUSG00000038128	1.05297	3.57982	3.14862e-09	1.49292e-07	Camk4	ENSMUSG00000038128	Camk4	ENSMUSG00000038128:Camk4.2	0.10642	chr18	32938636	32939636
ENSMUSG00000036223	0.613457	3.20012	0.000645677	0.0113249	Ska1	ENSMUSG00000036223	Ska1	ENSMUSG00000036223:Ska1	0.107356	chr18	74207247	74208247
ENSMUSG00000036223	0.613457	3.20012	0.000645677	0.0113249	Ska1	ENSMUSG00000036223	Ska1	ENSMUSG00000036223:Ska1.1	0.109059	chr18	74207279	74208279
ENSMUSG00000036223	0.613457	3.20012	0.000645677	0.0113249	Ska1	ENSMUSG00000036223	Ska1	ENSMUSG00000036223:Ska1.2	0.110171	chr18	74207318	74208318
ENSMUSG00000034295	1.27168	3.81826	1.01e-16	9.25154e-15	Fhod3	ENSMUSG00000034295	Fhod3	ENSMUSG00000034295:Fhod3.1	0.122937	chr18	24708923	24709923
ENSMUSG00000097746	1.585	-0.811048	0.0045063	0.0597719	Gm6225	ENSMUSG00000097746	Gm6225	ENSMUSG00000097746:Gm6225.1	0.125917	chr18	3336216	3337216
ENSMUSG00000024261	1.98011	4.74459	1.8182e-60	5.06746e-58	Syt4	ENSMUSG00000024261	Syt4	ENSMUSG00000024261:Syt4	0.128521	chr18	31446906	31447906
ENSMUSG00000097746	1.585	-0.811048	0.0045063	0.0597719	Gm6225	ENSMUSG00000097746	Gm6225	ENSMUSG00000097746:Gm6225	0.132661	chr18	3336158	3337158
ENSMUSG00000033016	0.671677	4.7351	6.11759e-10	3.17033e-08	Nfatc1	ENSMUSG00000033016	Nfatc1	ENSMUSG00000033016:Nfatc1.2	0.136524	chr18	80712266	80713266
ENSMUSG00000034295	1.27168	3.81826	1.01e-16	9.25154e-15	Fhod3	ENSMUSG00000034295	Fhod3	ENSMUSG00000034295:Fhod3	0.141389	chr18	24708101	24709101
ENSMUSG00000039616	2.54603	0.737815	2.12489e-10	1.173e-08	Mocos	ENSMUSG00000039616	Mocos	ENSMUSG00000039616:Mocos	0.143671	chr18	24653169	24654169
ENSMUSG00000033016	0.671677	4.7351	6.11759e-10	3.17033e-08	Nfatc1	ENSMUSG00000033016	Nfatc1	ENSMUSG00000033016:Nfatc1.3	0.143757	chr18	80712558	80713558
ENSMUSG00000033016	0.671677	4.7351	6.11759e-10	3.17033e-08	Nfatc1	ENSMUSG00000033016	Nfatc1	ENSMUSG00000033016:Nfatc1.4	0.145326	chr18	80712571	80713571
ENSMUSG00000024420	1.44581	6.67485	4.24244e-65	1.21958e-62	Zfp521	ENSMUSG00000024420	Zfp521	ENSMUSG00000024420:Zfp521.6	0.153984	chr18	13972287	13973287
ENSMUSG00000024420	1.44581	6.67485	4.24244e-65	1.21958e-62	Zfp521	ENSMUSG00000024420	Zfp521	ENSMUSG00000024420:Zfp521.5	0.157211	chr18	13972148	13973148
ENSMUSG00000063889	2.23247	4.00851	5.36076e-52	1.31736e-49	Crem	ENSMUSG00000063889	Crem	ENSMUSG00000063889:Crem.16	0.157625	chr18	3337013	3338013
ENSMUSG00000063889	2.23247	4.00851	5.36076e-52	1.31736e-49	Crem	ENSMUSG00000063889	Crem	ENSMUSG00000063889:Crem.15	0.158192	chr18	3336988	3337988
ENSMUSG00000063889	2.23247	4.00851	5.36076e-52	1.31736e-49	Crem	ENSMUSG00000063889	Crem	ENSMUSG00000063889:Crem.17	0.163639	chr18	3337033	3338033
ENSMUSG00000024420	1.44581	6.67485	4.24244e-65	1.21958e-62	Zfp521	ENSMUSG00000024420	Zfp521	ENSMUSG00000024420:Zfp521.4	0.164154	chr18	13972048	13973048
ENSMUSG00000063889	2.23247	4.00851	5.36076e-52	1.31736e-49	Crem	ENSMUSG00000063889	Crem	ENSMUSG00000063889:Crem.18	0.165881	chr18	3337074	3338074
ENSMUSG00000063889	2.23247	4.00851	5.36076e-52	1.31736e-49	Crem	ENSMUSG00000063889	Crem	ENSMUSG00000063889:Crem.19	0.166742	chr18	3337089	3338089
ENSMUSG00000063889	2.23247	4.00851	5.36076e-52	1.31736e-49	Crem	ENSMUSG00000063889	Crem	ENSMUSG00000063889:Crem.20	0.172801	chr18	3337179	3338179
ENSMUSG00000033016	0.671677	4.7351	6.11759e-10	3.17033e-08	Nfatc1	ENSMUSG00000033016	Nfatc1	ENSMUSG00000033016:Nfatc1.1	0.172955	chr18	80707673	80708673
ENSMUSG00000063889	2.23247	4.00851	5.36076e-52	1.31736e-49	Crem	ENSMUSG00000063889	Crem	ENSMUSG00000063889:Crem.21	0.177591	chr18	3337248	3338248
ENSMUSG00000059336	2.93231	1.38828	1.63586e-15	1.37196e-13	Slc14a1	ENSMUSG00000059336	Slc14a1	ENSMUSG00000059336:Slc14a1	0.182682	chr18	78122831	78123831
ENSMUSG00000039616	2.54603	0.737815	2.12489e-10	1.173e-08	Mocos	ENSMUSG00000039616	Mocos	ENSMUSG00000039616:Mocos.1	0.191135	chr18	24653356	24654356
ENSMUSG00000023036	0.541986	6.04207	4.48146e-08	1.76585e-06	Pcdhgc4	ENSMUSG00000023036	Pcdhgc4	ENSMUSG00000023036:Pcdhgc4	0.210832	chr18	37814557	37815557
ENSMUSG00000003779	0.768523	6.04397	2.48419e-16	2.2091e-14	Kif20a	ENSMUSG00000003779	Kif20a	ENSMUSG00000003779:Kif20a.3	0.217784	chr18	34624929	34625929
ENSMUSG00000043079	0.743231	1.89193	0.00507219	0.0658867	Synpo	ENSMUSG00000043079	Synpo	ENSMUSG00000043079:Synpo.4	0.220803	chr18	60623762	60624762
ENSMUSG00000043079	0.743231	1.89193	0.00507219	0.0658867	Synpo	ENSMUSG00000043079	Synpo	ENSMUSG00000043079:Synpo.3	0.231923	chr18	60623736	60624736
ENSMUSG00000043079	0.743231	1.89193	0.00507219	0.0658867	Synpo	ENSMUSG00000043079	Synpo	ENSMUSG00000043079:Synpo	0.24486	chr18	60599997	60600997
ENSMUSG00000033960	1.34628	5.12474	1.31223e-29	2.20513e-27	Jcad	ENSMUSG00000033960	Jcad	ENSMUSG00000033960:Jcad	0.253395	chr18	4634356	4635356
ENSMUSG00000043079	0.743231	1.89193	0.00507219	0.0658867	Synpo	ENSMUSG00000043079	Synpo	ENSMUSG00000043079:Synpo.5	0.256773	chr18	60623836	60624836
ENSMUSG00000024420	1.44581	6.67485	4.24244e-65	1.21958e-62	Zfp521	ENSMUSG00000024420	Zfp521	ENSMUSG00000024420:Zfp521.3	0.269976	chr18	13971220	13972220
ENSMUSG00000033871	0.814766	1.77297	0.00309235	0.0433441	Ppargc1b	ENSMUSG00000033871	Ppargc1b	ENSMUSG00000033871:Ppargc1b	0.276304	chr18	61399900	61400900
ENSMUSG00000033871	0.814766	1.77297	0.00309235	0.0433441	Ppargc1b	ENSMUSG00000033871	Ppargc1b	ENSMUSG00000033871:Ppargc1b.1	0.278554	chr18	61399931	61400931
ENSMUSG00000023036	0.541986	6.04207	4.48146e-08	1.76585e-06	Pcdhgc4	ENSMUSG00000023036	Pcdhgc4	ENSMUSG00000023036:Pcdhgc4.1	0.294344	chr18	37814906	37815906
ENSMUSG00000071862	0.984442	6.83021	3.84628e-32	6.81418e-30	Lrrtm2	ENSMUSG00000071862	Lrrtm2	ENSMUSG00000071862:Lrrtm2.1	0.301465	chr18	35214524	35215524
ENSMUSG00000071862	0.984442	6.83021	3.84628e-32	6.81418e-30	Lrrtm2	ENSMUSG00000071862	Lrrtm2	ENSMUSG00000071862:Lrrtm2	0.301888	chr18	35214508	35215508
ENSMUSG00000043079	0.743231	1.89193	0.00507219	0.0658867	Synpo	ENSMUSG00000043079	Synpo	ENSMUSG00000043079:Synpo.6	0.308499	chr18	60624073	60625073
ENSMUSG00000024517	3.27786	-0.951931	1.18789e-07	4.42511e-06	Grp	ENSMUSG00000024517	Grp	ENSMUSG00000024517:Grp	0.309999	chr18	65872298	65873298
ENSMUSG00000024617	0.864686	2.44692	0.000193647	0.00388894	Camk2a	ENSMUSG00000024617	Camk2a	ENSMUSG00000024617:Camk2a.1	0.321716	chr18	60925203	60926203
ENSMUSG00000024517	3.27786	-0.951931	1.18789e-07	4.42511e-06	Grp	ENSMUSG00000024517	Grp	ENSMUSG00000024517:Grp.2	0.329269	chr18	65872982	65873982
ENSMUSG00000024617	0.864686	2.44692	0.000193647	0.00388894	Camk2a	ENSMUSG00000024617	Camk2a	ENSMUSG00000024617:Camk2a	0.364051	chr18	60925103	60926103
ENSMUSG00000024517	3.27786	-0.951931	1.18789e-07	4.42511e-06	Grp	ENSMUSG00000024517	Grp	ENSMUSG00000024517:Grp.1	0.371315	chr18	65872526	65873526
ENSMUSG00000001473	0.611676	5.44328	2.20446e-10	1.20384e-08	Tubb6	ENSMUSG00000001473	Tubb6	ENSMUSG00000001473:Tubb6	0.371926	chr18	67390195	67391195
ENSMUSG00000024601	0.63164	5.78249	6.7104e-12	4.30785e-10	Isoc1	ENSMUSG00000024601	Isoc1	ENSMUSG00000024601:Isoc1	0.373569	chr18	58658951	58659951
ENSMUSG00000044948	1.36693	3.42155	2.74357e-15	2.25545e-13	Cfap43	ENSMUSG00000044948	Cfap43	ENSMUSG00000044948:Cfap43.2	0.00359952	chr19	47836861	47837861
ENSMUSG00000044948	1.36693	3.42155	2.74357e-15	2.25545e-13	Cfap43	ENSMUSG00000044948	Cfap43	ENSMUSG00000044948:Cfap43.3	0.00743831	chr19	47836882	47837882
ENSMUSG00000016495	0.755511	4.87002	4.72474e-13	3.32756e-11	Plgrkt	ENSMUSG00000016495	Plgrkt	ENSMUSG00000016495:Plgrkt.2	0.0148386	chr19	29361324	29362324
ENSMUSG00000003228	0.535542	4.24751	3.10507e-05	0.000743071	Grk5	ENSMUSG00000003228	Grk5	ENSMUSG00000003228:Grk5.2	0.016127	chr19	60889941	60890941
ENSMUSG00000016495	0.755511	4.87002	4.72474e-13	3.32756e-11	Plgrkt	ENSMUSG00000016495	Plgrkt	ENSMUSG00000016495:Plgrkt.4	0.0167296	chr19	29361470	29362470
ENSMUSG00000016495	0.755511	4.87002	4.72474e-13	3.32756e-11	Plgrkt	ENSMUSG00000016495	Plgrkt	ENSMUSG00000016495:Plgrkt.3	0.0171177	chr19	29361373	29362373
ENSMUSG00000024789	1.16414	6.96027	1.19878e-41	2.53675e-39	Jak2	ENSMUSG00000024789	Jak2	ENSMUSG00000024789:Jak2.1	0.0178074	chr19	29251919	29252919
ENSMUSG00000055044	1.07351	-0.072358	0.0137701	0.148365	Pdlim1	ENSMUSG00000055044	Pdlim1	ENSMUSG00000055044:Pdlim1.2	0.0217995	chr19	40271116	40272116
ENSMUSG00000003228	0.535542	4.24751	3.10507e-05	0.000743071	Grk5	ENSMUSG00000003228	Grk5	ENSMUSG00000003228:Grk5.1	0.022995	chr19	60889873	60890873
ENSMUSG00000024855	1.65587	6.51876	3.00837e-79	9.35418e-77	Pacs1	ENSMUSG00000024855	Pacs1	ENSMUSG00000024855:Pacs1.2	0.0283038	chr19	5272207	5273207
ENSMUSG00000003228	0.535542	4.24751	3.10507e-05	0.000743071	Grk5	ENSMUSG00000003228	Grk5	ENSMUSG00000003228:Grk5	0.0313049	chr19	60889227	60890227
ENSMUSG00000024855	1.65587	6.51876	3.00837e-79	9.35418e-77	Pacs1	ENSMUSG00000024855	Pacs1	ENSMUSG00000024855:Pacs1.3	0.0346294	chr19	5272528	5273528
ENSMUSG00000024855	1.65587	6.51876	3.00837e-79	9.35418e-77	Pacs1	ENSMUSG00000024855	Pacs1	ENSMUSG00000024855:Pacs1.5	0.0365313	chr19	5272619	5273619
ENSMUSG00000024855	1.65587	6.51876	3.00837e-79	9.35418e-77	Pacs1	ENSMUSG00000024855	Pacs1	ENSMUSG00000024855:Pacs1.4	0.0378863	chr19	5272605	5273605
ENSMUSG00000092274	1.31966	7.09917	4.05175e-54	1.04631e-51	Neat1	ENSMUSG00000092274	Neat1	ENSMUSG00000092274:Neat1.1	0.0399863	chr19	5844759	5845759
ENSMUSG00000025041	0.672872	5.47778	1.35029e-08	5.69888e-07	Nt5c2	ENSMUSG00000025041	Nt5c2	ENSMUSG00000025041:Nt5c2.4	0.0402538	chr19	46962042	46963042
ENSMUSG00000025041	0.672872	5.47778	1.35029e-08	5.69888e-07	Nt5c2	ENSMUSG00000025041	Nt5c2	ENSMUSG00000025041:Nt5c2.7	0.0456033	chr19	47014653	47015653
ENSMUSG00000024660	0.506033	6.16959	4.56678e-08	1.79483e-06	Incenp	ENSMUSG00000024660	Incenp	ENSMUSG00000024660:Incenp.4	0.0464962	chr19	9898881	9899881
ENSMUSG00000016495	0.755511	4.87002	4.72474e-13	3.32756e-11	Plgrkt	ENSMUSG00000016495	Plgrkt	ENSMUSG00000016495:Plgrkt.1	0.0471755	chr19	29360907	29361907
ENSMUSG00000024791	0.529278	3.45655	0.0017209	0.0265381	Cdca5	ENSMUSG00000024791	Cdca5	ENSMUSG00000024791:Cdca5.2	0.0476281	chr19	6085305	6086305
ENSMUSG00000024873	0.713652	3.67807	6.82353e-06	0.000183681	Cnih2	ENSMUSG00000024873	Cnih2	ENSMUSG00000024873:Cnih2	0.0480114	chr19	5097882	5098882
ENSMUSG00000046324	1.07603	7.61633	0.000235436	0.0046385	Ermp1	ENSMUSG00000046324	Ermp1	ENSMUSG00000046324:Ermp1.4	0.0490564	chr19	29647687	29648687
ENSMUSG00000024873	0.713652	3.67807	6.82353e-06	0.000183681	Cnih2	ENSMUSG00000024873	Cnih2	ENSMUSG00000024873:Cnih2.1	0.0534544	chr19	5098021	5099021
ENSMUSG00000024791	0.529278	3.45655	0.0017209	0.0265381	Cdca5	ENSMUSG00000024791	Cdca5	ENSMUSG00000024791:Cdca5.1	0.0555047	chr19	6085229	6086229
ENSMUSG00000024660	0.506033	6.16959	4.56678e-08	1.79483e-06	Incenp	ENSMUSG00000024660	Incenp	ENSMUSG00000024660:Incenp.6	0.0612996	chr19	9898989	9899989
ENSMUSG00000024660	0.506033	6.16959	4.56678e-08	1.79483e-06	Incenp	ENSMUSG00000024660	Incenp	ENSMUSG00000024660:Incenp.7	0.0613189	chr19	9899051	9900051
ENSMUSG00000024660	0.506033	6.16959	4.56678e-08	1.79483e-06	Incenp	ENSMUSG00000024660	Incenp	ENSMUSG00000024660:Incenp.5	0.0628093	chr19	9898961	9899961
ENSMUSG00000024789	1.16414	6.96027	1.19878e-41	2.53675e-39	Jak2	ENSMUSG00000024789	Jak2	ENSMUSG00000024789:Jak2	0.0674454	chr19	29251311	29252311
ENSMUSG00000053117	3.62076	0.222999	1.92323e-12	1.29297e-10	E330013P04Rik	ENSMUSG00000053117	E330013P04Rik	ENSMUSG00000053117:E330013P04Rik	0.0720693	chr19	60144167	60145167
ENSMUSG00000046324	1.07603	7.61633	0.000235436	0.0046385	Ermp1	ENSMUSG00000046324	Ermp1	ENSMUSG00000046324:Ermp1.5	0.0725936	chr19	29647878	29648878
ENSMUSG00000046324	1.07603	7.61633	0.000235436	0.0046385	Ermp1	ENSMUSG00000046324	Ermp1	ENSMUSG00000046324:Ermp1.7	0.0730977	chr19	29647915	29648915
ENSMUSG00000046324	1.07603	7.61633	0.000235436	0.0046385	Ermp1	ENSMUSG00000046324	Ermp1	ENSMUSG00000046324:Ermp1.6	0.0734577	chr19	29647890	29648890
ENSMUSG00000025041	0.672872	5.47778	1.35029e-08	5.69888e-07	Nt5c2	ENSMUSG00000025041	Nt5c2	ENSMUSG00000025041:Nt5c2.2	0.0735818	chr19	46961420	46962420
ENSMUSG00000025041	0.672872	5.47778	1.35029e-08	5.69888e-07	Nt5c2	ENSMUSG00000025041	Nt5c2	ENSMUSG00000025041:Nt5c2.3	0.079546	chr19	46961808	46962808
ENSMUSG00000052942	0.526697	4.07679	0.000124602	0.00261612	Glis3	ENSMUSG00000052942	Glis3	ENSMUSG00000052942:Glis3.6	0.0844499	chr19	28679166	28680166
ENSMUSG00000044390	0.533531	2.03255	0.036297	0.31203	Tigd3	ENSMUSG00000044390	Tigd3	ENSMUSG00000044390:Tigd3.1	0.0847616	chr19	5893649	5894649
ENSMUSG00000024742	0.670837	5.16035	1.87962e-11	1.15943e-09	Fen1	ENSMUSG00000024742	Fen1	ENSMUSG00000024742:Fen1.3	0.0890325	chr19	10203669	10204669
ENSMUSG00000044390	0.533531	2.03255	0.036297	0.31203	Tigd3	ENSMUSG00000044390	Tigd3	ENSMUSG00000044390:Tigd3	0.089471	chr19	5893607	5894607
ENSMUSG00000024989	0.654721	4.31316	1.61851e-06	4.9451e-05	Cep55	ENSMUSG00000024989	Cep55	ENSMUSG00000024989:Cep55	0.0938747	chr19	38054528	38055528
ENSMUSG00000060224	0.892278	-0.2325	0.0437176	0.354487	Pyroxd2	ENSMUSG00000060224	Pyroxd2	ENSMUSG00000060224:Pyroxd2.2	0.0953467	chr19	42752275	42753275
ENSMUSG00000060224	0.892278	-0.2325	0.0437176	0.354487	Pyroxd2	ENSMUSG00000060224	Pyroxd2	ENSMUSG00000060224:Pyroxd2	0.0963272	chr19	42751972	42752972
ENSMUSG00000052942	0.526697	4.07679	0.000124602	0.00261612	Glis3	ENSMUSG00000052942	Glis3	ENSMUSG00000052942:Glis3.7	0.101662	chr19	28679577	28680577
ENSMUSG00000060224	0.892278	-0.2325	0.0437176	0.354487	Pyroxd2	ENSMUSG00000060224	Pyroxd2	ENSMUSG00000060224:Pyroxd2.1	0.101888	chr19	42752004	42753004
ENSMUSG00000024795	0.537399	5.21322	3.34518e-07	1.14964e-05	Kif20b	ENSMUSG00000024795	Kif20b	ENSMUSG00000024795:Kif20b	0.10499	chr19	34921875	34922875
ENSMUSG00000069554	3.51848	-2.48175	0.000597236	0.0105644	I830134H01Rik	ENSMUSG00000069554	I830134H01Rik	ENSMUSG00000069554:I830134H01Rik	0.106338	chr19	38054028	38055028
ENSMUSG00000067242	0.75866	0.799688	0.0314136	0.279948	Lgi1	ENSMUSG00000067242	Lgi1	ENSMUSG00000067242:Lgi1.1	0.108921	chr19	38264136	38265136
ENSMUSG00000039699	11.05	3.9233	1.25621e-211	7.0023e-209	Batf2	ENSMUSG00000039699	Batf2	ENSMUSG00000039699:Batf2	0.110339	chr19	6140461	6141461
ENSMUSG00000039126	1.5799	6.05327	1.96024e-53	4.97771e-51	Prune2	ENSMUSG00000039126	Prune2	ENSMUSG00000039126:Prune2	0.11231	chr19	16955596	16956596
ENSMUSG00000046230	0.524716	5.63355	5.78248e-08	2.25709e-06	Vps13a	ENSMUSG00000046230	Vps13a	ENSMUSG00000046230:Vps13a.9	0.122182	chr19	16780412	16781412
ENSMUSG00000046230	0.524716	5.63355	5.78248e-08	2.25709e-06	Vps13a	ENSMUSG00000046230	Vps13a	ENSMUSG00000046230:Vps13a.8	0.123776	chr19	16780322	16781322
ENSMUSG00000025017	1.60641	-0.865016	0.00247814	0.036108	Pik3ap1	ENSMUSG00000025017	Pik3ap1	ENSMUSG00000025017:Pik3ap1	0.123791	chr19	41384599	41385599
ENSMUSG00000087132	1.47501	-1.76171	0.0362767	0.311914	A930001C03Rik	ENSMUSG00000087132	A930001C03Rik	ENSMUSG00000087132:A930001C03Rik.2	0.124548	chr19	4439037	4440037
ENSMUSG00000040414	1.10334	3.88323	4.27113e-14	3.22153e-12	Slc25a28	ENSMUSG00000040414	Slc25a28	ENSMUSG00000040414:Slc25a28.3	0.126845	chr19	43674381	43675381
ENSMUSG00000046230	0.524716	5.63355	5.78248e-08	2.25709e-06	Vps13a	ENSMUSG00000046230	Vps13a	ENSMUSG00000046230:Vps13a.10	0.127293	chr19	16780430	16781430
ENSMUSG00000040414	1.10334	3.88323	4.27113e-14	3.22153e-12	Slc25a28	ENSMUSG00000040414	Slc25a28	ENSMUSG00000040414:Slc25a28.2	0.128647	chr19	43674360	43675360
ENSMUSG00000024805	0.690022	2.98252	0.000359805	0.00677347	Pcgf5	ENSMUSG00000024805	Pcgf5	ENSMUSG00000024805:Pcgf5.1	0.130164	chr19	36348015	36349015
ENSMUSG00000024742	0.670837	5.16035	1.87962e-11	1.15943e-09	Fen1	ENSMUSG00000024742	Fen1	ENSMUSG00000024742:Fen1.2	0.133004	chr19	10203568	10204568
ENSMUSG00000024742	0.670837	5.16035	1.87962e-11	1.15943e-09	Fen1	ENSMUSG00000024742	Fen1	ENSMUSG00000024742:Fen1.1	0.142026	chr19	10203443	10204443
ENSMUSG00000024887	0.88884	2.67217	2.6844e-05	0.000649887	Asah2	ENSMUSG00000024887	Asah2	ENSMUSG00000024887:Asah2.4	0.14274	chr19	32102640	32103640
ENSMUSG00000055044	1.07351	-0.072358	0.0137701	0.148365	Pdlim1	ENSMUSG00000055044	Pdlim1	ENSMUSG00000055044:Pdlim1.3	0.143279	chr19	40271342	40272342
ENSMUSG00000039126	1.5799	6.05327	1.96024e-53	4.97771e-51	Prune2	ENSMUSG00000039126	Prune2	ENSMUSG00000039126:Prune2.2	0.144162	chr19	17136248	17137248
ENSMUSG00000024887	0.88884	2.67217	2.6844e-05	0.000649887	Asah2	ENSMUSG00000024887	Asah2	ENSMUSG00000024887:Asah2.3	0.147898	chr19	32102624	32103624
ENSMUSG00000025001	0.675504	5.20584	1.67598e-11	1.04084e-09	Hells	ENSMUSG00000025001	Hells	ENSMUSG00000025001:Hells	0.148561	chr19	38930393	38931393
ENSMUSG00000067242	0.75866	0.799688	0.0314136	0.279948	Lgi1	ENSMUSG00000067242	Lgi1	ENSMUSG00000067242:Lgi1	0.150382	chr19	38264034	38265034
ENSMUSG00000092274	1.31966	7.09917	4.05175e-54	1.04631e-51	Neat1	ENSMUSG00000092274	Neat1	ENSMUSG00000092274:Neat1.2	0.151641	chr19	5844977	5845977
ENSMUSG00000024742	0.670837	5.16035	1.87962e-11	1.15943e-09	Fen1	ENSMUSG00000024742	Fen1	ENSMUSG00000024742:Fen1	0.152555	chr19	10203394	10204394
ENSMUSG00000024805	0.690022	2.98252	0.000359805	0.00677347	Pcgf5	ENSMUSG00000024805	Pcgf5	ENSMUSG00000024805:Pcgf5	0.162716	chr19	36347787	36348787
ENSMUSG00000024816	0.553841	6.51989	9.68092e-11	5.62256e-09	Frmd8	ENSMUSG00000024816	Frmd8	ENSMUSG00000024816:Frmd8.2	0.163743	chr19	5874739	5875739
ENSMUSG00000024816	0.553841	6.51989	9.68092e-11	5.62256e-09	Frmd8	ENSMUSG00000024816	Frmd8	ENSMUSG00000024816:Frmd8.3	0.164139	chr19	5874774	5875774
ENSMUSG00000087132	1.47501	-1.76171	0.0362767	0.311914	A930001C03Rik	ENSMUSG00000087132	A930001C03Rik	ENSMUSG00000087132:A930001C03Rik.1	0.170481	chr19	4438801	4439801
ENSMUSG00000024824	0.602869	2.93327	0.00199021	0.0300028	Rad9a	ENSMUSG00000024824	Rad9a	ENSMUSG00000024824:Rad9a.5	0.172035	chr19	4201162	4202162
ENSMUSG00000060675	2.76866	4.42742	1.40905e-28	2.29198e-26	Plaat3	ENSMUSG00000060675	Pla2g16	ENSMUSG00000060675:Plaat3	0.177088	chr19	7556950	7557950
ENSMUSG00000024824	0.602869	2.93327	0.00199021	0.0300028	Rad9a	ENSMUSG00000024824	Rad9a	ENSMUSG00000024824:Rad9a.3	0.179274	chr19	4201111	4202111
ENSMUSG00000025001	0.675504	5.20584	1.67598e-11	1.04084e-09	Hells	ENSMUSG00000025001	Hells	ENSMUSG00000025001:Hells.1	0.179954	chr19	38930508	38931508
ENSMUSG00000050370	6.57303	-2.31999	1.49523e-06	4.6116e-05	Ch25h	ENSMUSG00000050370	Ch25h	ENSMUSG00000050370:Ch25h	0.180292	chr19	34474664	34475664
ENSMUSG00000043488	5.85927	-3.0134	0.000235309	0.00463799	Frmd8os	ENSMUSG00000043488	Frmd8os	ENSMUSG00000043488:Frmd8os	0.180771	chr19	5845101	5846101
ENSMUSG00000024824	0.602869	2.93327	0.00199021	0.0300028	Rad9a	ENSMUSG00000024824	Rad9a	ENSMUSG00000024824:Rad9a.2	0.183814	chr19	4201094	4202094
ENSMUSG00000024791	0.529278	3.45655	0.0017209	0.0265381	Cdca5	ENSMUSG00000024791	Cdca5	ENSMUSG00000024791:Cdca5	0.184733	chr19	6084461	6085461
ENSMUSG00000024824	0.602869	2.93327	0.00199021	0.0300028	Rad9a	ENSMUSG00000024824	Rad9a	ENSMUSG00000024824:Rad9a.4	0.186169	chr19	4201132	4202132
ENSMUSG00000044948	1.36693	3.42155	2.74357e-15	2.25545e-13	Cfap43	ENSMUSG00000044948	Cfap43	ENSMUSG00000044948:Cfap43.4	0.197095	chr19	47918787	47919787
ENSMUSG00000097558	2.18201	-3.01327	0.0494165	0.387565	Gm26902	ENSMUSG00000097558	Gm26902	ENSMUSG00000097558:Gm26902	0.203527	chr19	34474298	34475298
ENSMUSG00000087132	1.47501	-1.76171	0.0362767	0.311914	A930001C03Rik	ENSMUSG00000087132	A930001C03Rik	ENSMUSG00000087132:A930001C03Rik	0.21994	chr19	4438481	4439481
ENSMUSG00000040663	0.765908	0.958906	0.0303234	0.273	Clcf1	ENSMUSG00000040663	Clcf1	ENSMUSG00000040663:Clcf1.1	0.230397	chr19	4214072	4215072
ENSMUSG00000024998	0.784197	5.30114	6.33487e-11	3.74101e-09	Plce1	ENSMUSG00000024998	Plce1	ENSMUSG00000024998:Plce1	0.238135	chr19	38480593	38481593
ENSMUSG00000024942	2.95152	1.86735	1.08001e-19	1.21589e-17	Capn1	ENSMUSG00000024942	Capn1	ENSMUSG00000024942:Capn1	0.244888	chr19	6014705	6015705
ENSMUSG00000025001	0.675504	5.20584	1.67598e-11	1.04084e-09	Hells	ENSMUSG00000025001	Hells	ENSMUSG00000025001:Hells.2	0.248291	chr19	38930652	38931652
ENSMUSG00000001750	1.16637	3.75244	5.03508e-12	3.27373e-10	Tcirg1	ENSMUSG00000001750	Tcirg1	ENSMUSG00000001750:Tcirg1.10	0.256355	chr19	3906491	3907491
ENSMUSG00000001750	1.16637	3.75244	5.03508e-12	3.27373e-10	Tcirg1	ENSMUSG00000001750	Tcirg1	ENSMUSG00000001750:Tcirg1.13	0.259697	chr19	3906633	3907633
ENSMUSG00000001750	1.16637	3.75244	5.03508e-12	3.27373e-10	Tcirg1	ENSMUSG00000001750	Tcirg1	ENSMUSG00000001750:Tcirg1.12	0.268834	chr19	3906612	3907612
ENSMUSG00000024942	2.95152	1.86735	1.08001e-19	1.21589e-17	Capn1	ENSMUSG00000024942	Capn1	ENSMUSG00000024942:Capn1.4	0.269778	chr19	6015397	6016397
ENSMUSG00000024942	2.95152	1.86735	1.08001e-19	1.21589e-17	Capn1	ENSMUSG00000024942	Capn1	ENSMUSG00000024942:Capn1.3	0.272983	chr19	6015325	6016325
ENSMUSG00000092341	0.721481	13.7929	8.96247e-12	5.63489e-10	Malat1	ENSMUSG00000092341	Malat1	ENSMUSG00000092341:Malat1.1	0.274748	chr19	5796964	5797964
ENSMUSG00000024691	0.930419	5.30422	4.99219e-19	5.35641e-17	Fam111a	ENSMUSG00000024691	Fam111a	ENSMUSG00000024691:Fam111a.2	0.279464	chr19	12573001	12574001
ENSMUSG00000001750	1.16637	3.75244	5.03508e-12	3.27373e-10	Tcirg1	ENSMUSG00000001750	Tcirg1	ENSMUSG00000001750:Tcirg1.11	0.285195	chr19	3906540	3907540
ENSMUSG00000024942	2.95152	1.86735	1.08001e-19	1.21589e-17	Capn1	ENSMUSG00000024942	Capn1	ENSMUSG00000024942:Capn1.2	0.296942	chr19	6015289	6016289
ENSMUSG00000024942	2.95152	1.86735	1.08001e-19	1.21589e-17	Capn1	ENSMUSG00000024942	Capn1	ENSMUSG00000024942:Capn1.1	0.298498	chr19	6014885	6015885
ENSMUSG00000092341	0.721481	13.7929	8.96247e-12	5.63489e-10	Malat1	ENSMUSG00000092341	Malat1	ENSMUSG00000092341:Malat1.2	0.310061	chr19	5802172	5803172
ENSMUSG00000025001	0.675504	5.20584	1.67598e-11	1.04084e-09	Hells	ENSMUSG00000025001	Hells	ENSMUSG00000025001:Hells.3	0.316321	chr19	38930868	38931868
ENSMUSG00000024887	0.88884	2.67217	2.6844e-05	0.000649887	Asah2	ENSMUSG00000024887	Asah2	ENSMUSG00000024887:Asah2.5	0.3206	chr19	32107659	32108659
ENSMUSG00000024887	0.88884	2.67217	2.6844e-05	0.000649887	Asah2	ENSMUSG00000024887	Asah2	ENSMUSG00000024887:Asah2.6	0.323215	chr19	32107711	32108711
ENSMUSG00000024805	0.690022	2.98252	0.000359805	0.00677347	Pcgf5	ENSMUSG00000024805	Pcgf5	ENSMUSG00000024805:Pcgf5.4	0.331049	chr19	36409226	36410226
ENSMUSG00000024833	0.939433	4.67652	7.26496e-16	6.28915e-14	Pola2	ENSMUSG00000024833	Pola2	ENSMUSG00000024833:Pola2.6	0.343579	chr19	5963666	5964666
ENSMUSG00000024833	0.939433	4.67652	7.26496e-16	6.28915e-14	Pola2	ENSMUSG00000024833	Pola2	ENSMUSG00000024833:Pola2.5	0.345344	chr19	5963650	5964650
ENSMUSG00000024833	0.939433	4.67652	7.26496e-16	6.28915e-14	Pola2	ENSMUSG00000024833	Pola2	ENSMUSG00000024833:Pola2.7	0.349673	chr19	5963702	5964702
ENSMUSG00000092341	0.721481	13.7929	8.96247e-12	5.63489e-10	Malat1	ENSMUSG00000092341	Malat1	ENSMUSG00000092341:Malat1	0.352185	chr19	5796452	5797452
ENSMUSG00000035783	1.60167	2.27268	9.79616e-11	5.68227e-09	Acta2	ENSMUSG00000035783	Acta2	ENSMUSG00000035783:Acta2.1	0.364848	chr19	34255090	34256090
ENSMUSG00000040663	0.765908	0.958906	0.0303234	0.273	Clcf1	ENSMUSG00000040663	Clcf1	ENSMUSG00000040663:Clcf1	0.384056	chr19	4213812	4214812
ENSMUSG00000038754	3.77895	-3.7277	0.0384903	0.322201	Elovl3	ENSMUSG00000038754	Elovl3	ENSMUSG00000038754:Elovl3	0.389116	chr19	46131375	46132375
ENSMUSG00000045932	2.10414	6.10213	6.92319e-05	0.00153988	Ifit2	ENSMUSG00000045932	Ifit2	ENSMUSG00000045932:Ifit2	0.391357	chr19	34550180	34551180
ENSMUSG00000070730	1.23643	5.37498	2.58304e-25	3.73625e-23	Rmdn3	ENSMUSG00000070730	Rmdn3	ENSMUSG00000070730:Rmdn3.2	0.00123426	chr2	119156324	119157324
ENSMUSG00000048327	0.501291	6.53127	1.25934e-08	5.36459e-07	Ckap2l	ENSMUSG00000048327	Ckap2l	ENSMUSG00000048327:Ckap2l	0.0020236	chr2	129296712	129297712
ENSMUSG00000017929	0.809125	5.59571	1.85417e-17	1.78798e-15	B4galt5	ENSMUSG00000017929	B4galt5	ENSMUSG00000017929:B4galt5.3	0.00259718	chr2	167348683	167349683
ENSMUSG00000070730	1.23643	5.37498	2.58304e-25	3.73625e-23	Rmdn3	ENSMUSG00000070730	Rmdn3	ENSMUSG00000070730:Rmdn3.3	0.00336485	chr2	119156448	119157448
ENSMUSG00000057914	2.59256	3.3095	1.22557e-40	2.56965e-38	Cacnb2	ENSMUSG00000057914	Cacnb2	ENSMUSG00000057914:Cacnb2.2	0.00471979	chr2	14604600	14605600
ENSMUSG00000058740	1.10551	3.07649	3.90634e-09	1.82568e-07	Kcnt1	ENSMUSG00000058740	Kcnt1	ENSMUSG00000058740:Kcnt1.3	0.00650011	chr2	25863446	25864446
ENSMUSG00000001403	0.580786	6.37723	3.50785e-10	1.86297e-08	Ube2c	ENSMUSG00000001403	Ube2c	ENSMUSG00000001403:Ube2c	0.00754413	chr2	164769378	164770378
ENSMUSG00000070730	1.23643	5.37498	2.58304e-25	3.73625e-23	Rmdn3	ENSMUSG00000070730	Rmdn3	ENSMUSG00000070730:Rmdn3.4	0.00870865	chr2	119156464	119157464
ENSMUSG00000058740	1.10551	3.07649	3.90634e-09	1.82568e-07	Kcnt1	ENSMUSG00000058740	Kcnt1	ENSMUSG00000058740:Kcnt1.5	0.00915073	chr2	25877347	25878347
ENSMUSG00000027496	0.658111	5.04788	2.26608e-08	9.23979e-07	Aurka	ENSMUSG00000027496	Aurka	ENSMUSG00000027496:Aurka.1	0.0112892	chr2	172370006	172371006
ENSMUSG00000032698	1.19129	1.07618	0.000687896	0.0119795	Lmo2	ENSMUSG00000032698	Lmo2	ENSMUSG00000032698:Lmo2.1	0.0118818	chr2	103969006	103970006
ENSMUSG00000070730	1.23643	5.37498	2.58304e-25	3.73625e-23	Rmdn3	ENSMUSG00000070730	Rmdn3	ENSMUSG00000070730:Rmdn3.5	0.0125431	chr2	119156534	119157534
ENSMUSG00000027496	0.658111	5.04788	2.26608e-08	9.23979e-07	Aurka	ENSMUSG00000027496	Aurka	ENSMUSG00000027496:Aurka.2	0.0125881	chr2	172370021	172371021
ENSMUSG00000027496	0.658111	5.04788	2.26608e-08	9.23979e-07	Aurka	ENSMUSG00000027496	Aurka	ENSMUSG00000027496:Aurka.3	0.012883	chr2	172370035	172371035
ENSMUSG00000026880	0.962727	5.13551	2.06091e-19	2.28087e-17	Stom	ENSMUSG00000026880	Stom	ENSMUSG00000026880:Stom.1	0.0145069	chr2	35336476	35337476
ENSMUSG00000075416	2.64604	-2.54048	0.00669006	0.0827576	Gm14488	ENSMUSG00000075416	Gm14488	ENSMUSG00000075416:Gm14488.1	0.0154236	chr2	30719557	30720557
ENSMUSG00000058740	1.10551	3.07649	3.90634e-09	1.82568e-07	Kcnt1	ENSMUSG00000058740	Kcnt1	ENSMUSG00000058740:Kcnt1.4	0.0171304	chr2	25877261	25878261
ENSMUSG00000027381	0.716958	3.58303	1.82291e-05	0.000454563	Bcl2l11	ENSMUSG00000027381	Bcl2l11	ENSMUSG00000027381:Bcl2l11.1	0.0173577	chr2	128127053	128128053
ENSMUSG00000015090	0.874076	3.62708	1.54635e-07	5.66805e-06	Ptgds	ENSMUSG00000015090	Ptgds	ENSMUSG00000015090:Ptgds.2	0.0244401	chr2	25469249	25470249
ENSMUSG00000027379	0.617693	5.17976	2.6345e-09	1.26356e-07	Bub1	ENSMUSG00000027379	Bub1	ENSMUSG00000027379:Bub1.4	0.0245154	chr2	127831365	127832365
ENSMUSG00000026946	2.87034	3.11122	4.94271e-43	1.08616e-40	Nmi	ENSMUSG00000026946	Nmi	ENSMUSG00000026946:Nmi.5	0.0251416	chr2	51972994	51973994
ENSMUSG00000006418	1.20732	5.9737	6.41051e-39	1.30227e-36	Rnf114	ENSMUSG00000006418	Rnf114	ENSMUSG00000006418:Rnf114.1	0.0263737	chr2	167502567	167503567
ENSMUSG00000027238	0.938337	5.32305	6.77972e-18	6.73669e-16	Frmd5	ENSMUSG00000027238	Frmd5	ENSMUSG00000027238:Frmd5.8	0.0315182	chr2	121806492	121807492
ENSMUSG00000026785	0.988823	0.283131	0.0379442	0.321586	Pkn3	ENSMUSG00000026785	Pkn3	ENSMUSG00000026785:Pkn3	0.0316296	chr2	30077162	30078162
ENSMUSG00000027238	0.938337	5.32305	6.77972e-18	6.73669e-16	Frmd5	ENSMUSG00000027238	Frmd5	ENSMUSG00000027238:Frmd5.7	0.0329706	chr2	121806372	121807372
ENSMUSG00000049252	0.909996	7.03672	8.78486e-28	1.38941e-25	Lrp1b	ENSMUSG00000049252	Lrp1b	ENSMUSG00000049252:Lrp1b.11	0.033932	chr2	42653124	42654124
ENSMUSG00000027238	0.938337	5.32305	6.77972e-18	6.73669e-16	Frmd5	ENSMUSG00000027238	Frmd5	ENSMUSG00000027238:Frmd5.9	0.0344197	chr2	121806523	121807523
ENSMUSG00000027381	0.716958	3.58303	1.82291e-05	0.000454563	Bcl2l11	ENSMUSG00000027381	Bcl2l11	ENSMUSG00000027381:Bcl2l11.2	0.0357016	chr2	128127609	128128609
ENSMUSG00000078137	3.33203	-3.09793	0.00767313	0.0927349	Ankrd63	ENSMUSG00000078137	Ankrd63	ENSMUSG00000078137:Ankrd63	0.0375355	chr2	118703463	118704463
ENSMUSG00000015090	0.874076	3.62708	1.54635e-07	5.66805e-06	Ptgds	ENSMUSG00000015090	Ptgds	ENSMUSG00000015090:Ptgds.3	0.0375896	chr2	25469342	25470342
ENSMUSG00000026787	1.27981	0.473532	0.00218841	0.0325506	Gad2	ENSMUSG00000026787	Gad2	ENSMUSG00000026787:Gad2	0.0383607	chr2	22621683	22622683
ENSMUSG00000027379	0.617693	5.17976	2.6345e-09	1.26356e-07	Bub1	ENSMUSG00000027379	Bub1	ENSMUSG00000027379:Bub1.3	0.0384142	chr2	127831304	127832304
ENSMUSG00000042604	1.46865	1.71714	2.4494e-06	7.23238e-05	Kcna4	ENSMUSG00000042604	Kcna4	ENSMUSG00000042604:Kcna4.1	0.0385341	chr2	107290873	107291873
ENSMUSG00000032698	1.19129	1.07618	0.000687896	0.0119795	Lmo2	ENSMUSG00000032698	Lmo2	ENSMUSG00000032698:Lmo2.4	0.0399907	chr2	103970657	103971657
ENSMUSG00000027238	0.938337	5.32305	6.77972e-18	6.73669e-16	Frmd5	ENSMUSG00000027238	Frmd5	ENSMUSG00000027238:Frmd5.10	0.0406183	chr2	121806557	121807557
ENSMUSG00000027238	0.938337	5.32305	6.77972e-18	6.73669e-16	Frmd5	ENSMUSG00000027238	Frmd5	ENSMUSG00000027238:Frmd5.11	0.0408001	chr2	121806587	121807587
ENSMUSG00000027454	0.922447	2.83102	8.13715e-06	0.000215863	Gins1	ENSMUSG00000027454	Gins1	ENSMUSG00000027454:Gins1.1	0.043264	chr2	150909083	150910083
ENSMUSG00000091037	4.22183	-3.72763	0.0232638	0.222922	NA	ENSMUSG00000091037	Gm17661	ENSMUSG00000091037:Gm17661	0.0456503	chr2	90917121	90918121
ENSMUSG00000074923	5.49521	4.38454	1.53215e-206	8.23902e-204	Pak6	ENSMUSG00000074923	Pak6	ENSMUSG00000074923:Pak6.3	0.0496949	chr2	118676724	118677724
ENSMUSG00000027035	1.51593	5.28949	1.66265e-48	3.91734e-46	Cers6	ENSMUSG00000027035	Cers6	ENSMUSG00000027035:Cers6	0.0516098	chr2	68860933	68861933
ENSMUSG00000027654	0.748428	4.48869	9.91874e-10	5.0374e-08	Fam83d	ENSMUSG00000027654	Fam83d	ENSMUSG00000027654:Fam83d	0.0517298	chr2	158767571	158768571
ENSMUSG00000034906	0.545281	5.47593	1.818e-07	6.56376e-06	Ncaph	ENSMUSG00000034906	Ncaph	ENSMUSG00000034906:Ncaph.3	0.0529685	chr2	127133400	127134400
ENSMUSG00000027035	1.51593	5.28949	1.66265e-48	3.91734e-46	Cers6	ENSMUSG00000027035	Cers6	ENSMUSG00000027035:Cers6.1	0.0558022	chr2	68861064	68862064
ENSMUSG00000026785	0.988823	0.283131	0.0379442	0.321586	Pkn3	ENSMUSG00000026785	Pkn3	ENSMUSG00000026785:Pkn3.1	0.057319	chr2	30077221	30078221
ENSMUSG00000057914	2.59256	3.3095	1.22557e-40	2.56965e-38	Cacnb2	ENSMUSG00000057914	Cacnb2	ENSMUSG00000057914:Cacnb2.1	0.0606832	chr2	14603784	14604784
ENSMUSG00000034906	0.545281	5.47593	1.818e-07	6.56376e-06	Ncaph	ENSMUSG00000034906	Ncaph	ENSMUSG00000034906:Ncaph.4	0.0630107	chr2	127133454	127134454
ENSMUSG00000015090	0.874076	3.62708	1.54635e-07	5.66805e-06	Ptgds	ENSMUSG00000015090	Ptgds	ENSMUSG00000015090:Ptgds.1	0.0638698	chr2	25468883	25469883
ENSMUSG00000015090	0.874076	3.62708	1.54635e-07	5.66805e-06	Ptgds	ENSMUSG00000015090	Ptgds	ENSMUSG00000015090:Ptgds.4	0.0639027	chr2	25469546	25470546
ENSMUSG00000026824	0.599438	3.94148	0.000272469	0.00529507	Kcnj3	ENSMUSG00000026824	Kcnj3	ENSMUSG00000026824:Kcnj3.1	0.0641511	chr2	55436638	55437638
ENSMUSG00000027220	0.92641	1.28994	0.0154627	0.162737	Syt13	ENSMUSG00000027220	Syt13	ENSMUSG00000027220:Syt13	0.0648767	chr2	92914576	92915576
ENSMUSG00000049252	0.909996	7.03672	8.78486e-28	1.38941e-25	Lrp1b	ENSMUSG00000049252	Lrp1b	ENSMUSG00000049252:Lrp1b.10	0.0651056	chr2	42652756	42653756
ENSMUSG00000026888	1.78486	4.01664	6.94785e-35	1.30153e-32	Grb14	ENSMUSG00000026888	Grb14	ENSMUSG00000026888:Grb14	0.0673203	chr2	64914519	64915519
ENSMUSG00000026980	2.57778	1.15791	2.4435e-12	1.62337e-10	Ly75	ENSMUSG00000026980	Ly75	ENSMUSG00000026980:Ly75	0.0715141	chr2	60382731	60383731
ENSMUSG00000006418	1.20732	5.9737	6.41051e-39	1.30227e-36	Rnf114	ENSMUSG00000006418	Rnf114	ENSMUSG00000006418:Rnf114.2	0.0722062	chr2	167502924	167503924
ENSMUSG00000049252	0.909996	7.03672	8.78486e-28	1.38941e-25	Lrp1b	ENSMUSG00000049252	Lrp1b	ENSMUSG00000049252:Lrp1b.8	0.0766854	chr2	42652557	42653557
ENSMUSG00000049252	0.909996	7.03672	8.78486e-28	1.38941e-25	Lrp1b	ENSMUSG00000049252	Lrp1b	ENSMUSG00000049252:Lrp1b.9	0.0768376	chr2	42652573	42653573
ENSMUSG00000026970	1.63804	3.82991	2.27144e-26	3.40404e-24	Rbms1	ENSMUSG00000026970	Rbms1	ENSMUSG00000026970:Rbms1.8	0.0772737	chr2	60962692	60963692
ENSMUSG00000026980	2.57778	1.15791	2.4435e-12	1.62337e-10	Ly75	ENSMUSG00000026980	Ly75	ENSMUSG00000026980:Ly75.1	0.0798853	chr2	60382803	60383803
ENSMUSG00000042604	1.46865	1.71714	2.4494e-06	7.23238e-05	Kcna4	ENSMUSG00000042604	Kcna4	ENSMUSG00000042604:Kcna4	0.0856335	chr2	107290117	107291117
ENSMUSG00000033368	5.7592	-1.16334	3.34736e-11	2.01849e-09	Trim69	ENSMUSG00000033368	Trim69	ENSMUSG00000033368:Trim69	0.0878833	chr2	122160178	122161178
ENSMUSG00000049252	0.909996	7.03672	8.78486e-28	1.38941e-25	Lrp1b	ENSMUSG00000049252	Lrp1b	ENSMUSG00000049252:Lrp1b.7	0.0909073	chr2	42652515	42653515
ENSMUSG00000026923	0.834289	9.03898	1.29422e-23	1.7872e-21	Notch1	ENSMUSG00000026923	Notch1	ENSMUSG00000026923:Notch1.4	0.0910326	chr2	26466294	26467294
ENSMUSG00000010505	0.643301	8.13519	1.00112e-15	8.55312e-14	Myt1	ENSMUSG00000010505	Myt1	ENSMUSG00000010505:Myt1.5	0.0936914	chr2	181795785	181796785
ENSMUSG00000033368	5.7592	-1.16334	3.34736e-11	2.01849e-09	Trim69	ENSMUSG00000033368	Trim69	ENSMUSG00000033368:Trim69.1	0.0960072	chr2	122160280	122161280
ENSMUSG00000034780	0.689153	5.11088	2.18797e-10	1.19913e-08	B3galt1	ENSMUSG00000034780	B3galt1	ENSMUSG00000034780:B3galt1	0.0972064	chr2	67565349	67566349
ENSMUSG00000039501	1.78325	6.29756	3.74059e-88	1.26648e-85	Znfx1	ENSMUSG00000039501	Znfx1	ENSMUSG00000039501:Znfx1.4	0.0983858	chr2	167062515	167063515
ENSMUSG00000027204	0.554306	5.55555	6.30482e-09	2.83922e-07	Fbn1	ENSMUSG00000027204	Fbn1	ENSMUSG00000027204:Fbn1	0.0992444	chr2	125505572	125506572
ENSMUSG00000027490	0.713101	3.50809	1.6686e-05	0.000418828	E2f1	ENSMUSG00000027490	E2f1	ENSMUSG00000027490:E2f1.1	0.110837	chr2	154569392	154570392
ENSMUSG00000049252	0.909996	7.03672	8.78486e-28	1.38941e-25	Lrp1b	ENSMUSG00000049252	Lrp1b	ENSMUSG00000049252:Lrp1b.6	0.111315	chr2	42652426	42653426
ENSMUSG00000086754	4.02822	-3.72767	0.0275058	0.253611	Gm16098	ENSMUSG00000086754	Gm16098	ENSMUSG00000086754:Gm16098	0.113956	chr2	155826266	155827266
ENSMUSG00000074736	1.3768	2.63688	3.13334e-09	1.48876e-07	Syndig1	ENSMUSG00000074736	Syndig1	ENSMUSG00000074736:Syndig1.1	0.115279	chr2	149830333	149831333
ENSMUSG00000026784	0.612697	3.94197	4.02561e-05	0.000940229	Pdss1	ENSMUSG00000026784	Pdss1	ENSMUSG00000026784:Pdss1	0.116826	chr2	22895000	22896000
ENSMUSG00000027490	0.713101	3.50809	1.6686e-05	0.000418828	E2f1	ENSMUSG00000027490	E2f1	ENSMUSG00000027490:E2f1	0.11686	chr2	154569220	154570220
ENSMUSG00000039501	1.78325	6.29756	3.74059e-88	1.26648e-85	Znfx1	ENSMUSG00000039501	Znfx1	ENSMUSG00000039501:Znfx1.3	0.11867	chr2	167062216	167063216
ENSMUSG00000027018	0.54355	4.90704	2.24708e-07	7.96197e-06	Hat1	ENSMUSG00000027018	Hat1	ENSMUSG00000027018:Hat1	0.119009	chr2	71388436	71389436
ENSMUSG00000027115	0.50222	5.22641	2.46978e-05	0.000601752	Kif18a	ENSMUSG00000027115	Kif18a	ENSMUSG00000027115:Kif18a	0.120275	chr2	109280216	109281216
ENSMUSG00000017144	0.622938	4.35942	9.36706e-07	3.00245e-05	Rnd3	ENSMUSG00000017144	Rnd3	ENSMUSG00000017144:Rnd3.1	0.123428	chr2	51148611	51149611
ENSMUSG00000061186	0.645904	3.918	3.16092e-05	0.00075525	Sfmbt2	ENSMUSG00000061186	Sfmbt2	ENSMUSG00000061186:Sfmbt2.1	0.123506	chr2	10371921	10372921
ENSMUSG00000036833	0.524429	3.28044	0.00261749	0.0377058	Pnpla7	ENSMUSG00000036833	Pnpla7	ENSMUSG00000036833:Pnpla7	0.125343	chr2	24975568	24976568
ENSMUSG00000017144	0.622938	4.35942	9.36706e-07	3.00245e-05	Rnd3	ENSMUSG00000017144	Rnd3	ENSMUSG00000017144:Rnd3	0.125463	chr2	51148594	51149594
ENSMUSG00000033213	1.68445	-1.75454	0.0118578	0.131617	AA467197	ENSMUSG00000033213	AA467197	ENSMUSG00000033213:AA467197.2	0.126828	chr2	122637393	122638393
ENSMUSG00000026831	1.03712	-0.535111	0.0291474	0.264287	Pierce1	ENSMUSG00000026831	1700007K13Rik	ENSMUSG00000026831:1700007K13Rik	0.128554	chr2	28465352	28466352
ENSMUSG00000026923	0.834289	9.03898	1.29422e-23	1.7872e-21	Notch1	ENSMUSG00000026923	Notch1	ENSMUSG00000026923:Notch1.8	0.128832	chr2	26503323	26504323
ENSMUSG00000027469	0.603935	7.34212	9.81096e-13	6.72323e-11	Tpx2	ENSMUSG00000027469	Tpx2	ENSMUSG00000027469:Tpx2	0.13203	chr2	152847457	152848457
ENSMUSG00000027469	0.603935	7.34212	9.81096e-13	6.72323e-11	Tpx2	ENSMUSG00000027469	Tpx2	ENSMUSG00000027469:Tpx2.1	0.134235	chr2	152847560	152848560
ENSMUSG00000027115	0.50222	5.22641	2.46978e-05	0.000601752	Kif18a	ENSMUSG00000027115	Kif18a	ENSMUSG00000027115:Kif18a.1	0.136449	chr2	109280325	109281325
ENSMUSG00000027018	0.54355	4.90704	2.24708e-07	7.96197e-06	Hat1	ENSMUSG00000027018	Hat1	ENSMUSG00000027018:Hat1.1	0.137007	chr2	71388738	71389738
ENSMUSG00000026946	2.87034	3.11122	4.94271e-43	1.08616e-40	Nmi	ENSMUSG00000026946	Nmi	ENSMUSG00000026946:Nmi.4	0.137561	chr2	51972724	51973724
ENSMUSG00000033213	1.68445	-1.75454	0.0118578	0.131617	AA467197	ENSMUSG00000033213	AA467197	ENSMUSG00000033213:AA467197.1	0.140034	chr2	122637328	122638328
ENSMUSG00000039501	1.78325	6.29756	3.74059e-88	1.26648e-85	Znfx1	ENSMUSG00000039501	Znfx1	ENSMUSG00000039501:Znfx1.2	0.140298	chr2	167062139	167063139
ENSMUSG00000050808	1.71498	0.44776	0.0119013	0.132003	Muc15	ENSMUSG00000050808	Muc15	ENSMUSG00000050808:Muc15.1	0.140616	chr2	110721107	110722107
ENSMUSG00000017861	0.798422	4.4784	4.51153e-11	2.68158e-09	Mybl2	ENSMUSG00000017861	Mybl2	ENSMUSG00000017861:Mybl2.4	0.143598	chr2	163074631	163075631
ENSMUSG00000026784	0.612697	3.94197	4.02561e-05	0.000940229	Pdss1	ENSMUSG00000026784	Pdss1	ENSMUSG00000026784:Pdss1.1	0.143667	chr2	22895085	22896085
ENSMUSG00000027323	0.714349	4.07442	2.27538e-07	8.04356e-06	Rad51	ENSMUSG00000027323	Rad51	ENSMUSG00000027323:Rad51	0.146458	chr2	119112283	119113283
ENSMUSG00000026797	1.26769	7.01189	9.69905e-52	2.37072e-49	Stxbp1	ENSMUSG00000026797	Stxbp1	ENSMUSG00000026797:Stxbp1.2	0.151669	chr2	32846704	32847704
ENSMUSG00000027358	0.906606	0.129345	0.0330822	0.291368	Bmp2	ENSMUSG00000027358	Bmp2	ENSMUSG00000027358:Bmp2	0.152806	chr2	133551637	133552637
ENSMUSG00000026923	0.834289	9.03898	1.29422e-23	1.7872e-21	Notch1	ENSMUSG00000026923	Notch1	ENSMUSG00000026923:Notch1.5	0.153081	chr2	26467113	26468113
ENSMUSG00000026797	1.26769	7.01189	9.69905e-52	2.37072e-49	Stxbp1	ENSMUSG00000026797	Stxbp1	ENSMUSG00000026797:Stxbp1.3	0.155996	chr2	32846745	32847745
ENSMUSG00000085741	0.883668	3.14947	2.24397e-06	6.68192e-05	5430405H02Rik	ENSMUSG00000085741	5430405H02Rik	ENSMUSG00000085741:5430405H02Rik.3	0.162554	chr2	156862463	156863463
ENSMUSG00000085741	0.883668	3.14947	2.24397e-06	6.68192e-05	5430405H02Rik	ENSMUSG00000085741	5430405H02Rik	ENSMUSG00000085741:5430405H02Rik.1	0.16268	chr2	156862394	156863394
ENSMUSG00000085741	0.883668	3.14947	2.24397e-06	6.68192e-05	5430405H02Rik	ENSMUSG00000085741	5430405H02Rik	ENSMUSG00000085741:5430405H02Rik.2	0.164617	chr2	156862445	156863445
ENSMUSG00000027454	0.922447	2.83102	8.13715e-06	0.000215863	Gins1	ENSMUSG00000027454	Gins1	ENSMUSG00000027454:Gins1	0.167168	chr2	150904878	150905878
ENSMUSG00000068079	4.31223	-1.33612	1.97206e-08	8.1046e-07	Tcf15	ENSMUSG00000068079	Tcf15	ENSMUSG00000068079:Tcf15	0.171917	chr2	152143039	152144039
ENSMUSG00000027347	1.64204	2.11344	1.32532e-10	7.60074e-09	Rasgrp1	ENSMUSG00000027347	Rasgrp1	ENSMUSG00000027347:Rasgrp1	0.17595	chr2	117342209	117343209
ENSMUSG00000060802	5.90537	9.55236	0	0	B2m	ENSMUSG00000060802	B2m	ENSMUSG00000060802:B2m	0.176189	chr2	122147164	122148164
ENSMUSG00000015090	0.874076	3.62708	1.54635e-07	5.66805e-06	Ptgds	ENSMUSG00000015090	Ptgds	ENSMUSG00000015090:Ptgds	0.178154	chr2	25468657	25469657
ENSMUSG00000026784	0.612697	3.94197	4.02561e-05	0.000940229	Pdss1	ENSMUSG00000026784	Pdss1	ENSMUSG00000026784:Pdss1.2	0.17948	chr2	22895526	22896526
ENSMUSG00000040812	1.05917	0.153391	0.011905	0.132012	Agbl2	ENSMUSG00000040812	Agbl2	ENSMUSG00000040812:Agbl2	0.182965	chr2	90782213	90783213
ENSMUSG00000058740	1.10551	3.07649	3.90634e-09	1.82568e-07	Kcnt1	ENSMUSG00000058740	Kcnt1	ENSMUSG00000058740:Kcnt1.2	0.184442	chr2	25863332	25864332
ENSMUSG00000049401	1.1501	6.70633	9.2099e-42	1.96713e-39	Ogfr	ENSMUSG00000049401	Ogfr	ENSMUSG00000049401:Ogfr.1	0.187426	chr2	180588940	180589940
ENSMUSG00000027204	0.554306	5.55555	6.30482e-09	2.83922e-07	Fbn1	ENSMUSG00000027204	Fbn1	ENSMUSG00000027204:Fbn1.1	0.187652	chr2	125505885	125506885
ENSMUSG00000026785	0.988823	0.283131	0.0379442	0.321586	Pkn3	ENSMUSG00000026785	Pkn3	ENSMUSG00000026785:Pkn3.2	0.190118	chr2	30077691	30078691
ENSMUSG00000027381	0.716958	3.58303	1.82291e-05	0.000454563	Bcl2l11	ENSMUSG00000027381	Bcl2l11	ENSMUSG00000027381:Bcl2l11	0.194811	chr2	128125522	128126522
ENSMUSG00000026946	2.87034	3.11122	4.94271e-43	1.08616e-40	Nmi	ENSMUSG00000026946	Nmi	ENSMUSG00000026946:Nmi.3	0.19695	chr2	51972516	51973516
ENSMUSG00000032698	1.19129	1.07618	0.000687896	0.0119795	Lmo2	ENSMUSG00000032698	Lmo2	ENSMUSG00000032698:Lmo2.2	0.199332	chr2	103969613	103970613
ENSMUSG00000026669	0.846387	4.71343	2.39821e-14	1.83614e-12	Mcm10	ENSMUSG00000026669	Mcm10	ENSMUSG00000026669:Mcm10.7	0.202406	chr2	5012215	5013215
ENSMUSG00000026669	0.846387	4.71343	2.39821e-14	1.83614e-12	Mcm10	ENSMUSG00000026669	Mcm10	ENSMUSG00000026669:Mcm10.9	0.202797	chr2	5012291	5013291
ENSMUSG00000026669	0.846387	4.71343	2.39821e-14	1.83614e-12	Mcm10	ENSMUSG00000026669	Mcm10	ENSMUSG00000026669:Mcm10.8	0.203441	chr2	5012253	5013253
ENSMUSG00000027466	0.579449	5.91437	2.00887e-10	1.12251e-08	Rbck1	ENSMUSG00000027466	Rbck1	ENSMUSG00000027466:Rbck1.5	0.207442	chr2	152331884	152332884
ENSMUSG00000027466	0.579449	5.91437	2.00887e-10	1.12251e-08	Rbck1	ENSMUSG00000027466	Rbck1	ENSMUSG00000027466:Rbck1.6	0.208121	chr2	152331912	152332912
ENSMUSG00000027466	0.579449	5.91437	2.00887e-10	1.12251e-08	Rbck1	ENSMUSG00000027466	Rbck1	ENSMUSG00000027466:Rbck1.7	0.208483	chr2	152332153	152333153
ENSMUSG00000026824	0.599438	3.94148	0.000272469	0.00529507	Kcnj3	ENSMUSG00000026824	Kcnj3	ENSMUSG00000026824:Kcnj3	0.209475	chr2	55435448	55436448
ENSMUSG00000026946	2.87034	3.11122	4.94271e-43	1.08616e-40	Nmi	ENSMUSG00000026946	Nmi	ENSMUSG00000026946:Nmi.2	0.210884	chr2	51972504	51973504
ENSMUSG00000026893	0.81281	3.38078	2.48902e-06	7.33041e-05	Gca	ENSMUSG00000026893	Gca	ENSMUSG00000026893:Gca	0.213855	chr2	62663763	62664763
ENSMUSG00000032698	1.19129	1.07618	0.000687896	0.0119795	Lmo2	ENSMUSG00000032698	Lmo2	ENSMUSG00000032698:Lmo2.3	0.222226	chr2	103969711	103970711
ENSMUSG00000026831	1.03712	-0.535111	0.0291474	0.264287	Pierce1	ENSMUSG00000026831	1700007K13Rik	ENSMUSG00000026831:1700007K13Rik.1	0.226233	chr2	28465816	28466816
ENSMUSG00000026728	0.562947	8.67156	5.68574e-12	3.67587e-10	Vim	ENSMUSG00000026728	Vim	ENSMUSG00000026728:Vim.2	0.228891	chr2	13574001	13575001
ENSMUSG00000026946	2.87034	3.11122	4.94271e-43	1.08616e-40	Nmi	ENSMUSG00000026946	Nmi	ENSMUSG00000026946:Nmi.1	0.229535	chr2	51972470	51973470
ENSMUSG00000026831	1.03712	-0.535111	0.0291474	0.264287	Pierce1	ENSMUSG00000026831	1700007K13Rik	ENSMUSG00000026831:1700007K13Rik.2	0.233959	chr2	28465832	28466832
ENSMUSG00000079499	0.542487	3.983	0.000148542	0.00305561	6530402F18Rik	ENSMUSG00000079499	6530402F18Rik	ENSMUSG00000079499:6530402F18Rik	0.235331	chr2	29252493	29253493
ENSMUSG00000026669	0.846387	4.71343	2.39821e-14	1.83614e-12	Mcm10	ENSMUSG00000026669	Mcm10	ENSMUSG00000026669:Mcm10.6	0.236623	chr2	5011844	5012844
ENSMUSG00000027306	0.638482	6.39943	1.22585e-12	8.35038e-11	Nusap1	ENSMUSG00000027306	Nusap1	ENSMUSG00000027306:Nusap1.1	0.243286	chr2	119618189	119619189
ENSMUSG00000027347	1.64204	2.11344	1.32532e-10	7.60074e-09	Rasgrp1	ENSMUSG00000027347	Rasgrp1	ENSMUSG00000027347:Rasgrp1.2	0.244245	chr2	117342425	117343425
ENSMUSG00000049401	1.1501	6.70633	9.2099e-42	1.96713e-39	Ogfr	ENSMUSG00000049401	Ogfr	ENSMUSG00000049401:Ogfr	0.246234	chr2	180588723	180589723
ENSMUSG00000056501	1.16916	1.93879	1.0549e-05	0.000274118	Cebpb	ENSMUSG00000056501	Cebpb	ENSMUSG00000056501:Cebpb	0.247082	chr2	167688393	167689393
ENSMUSG00000058740	1.10551	3.07649	3.90634e-09	1.82568e-07	Kcnt1	ENSMUSG00000058740	Kcnt1	ENSMUSG00000058740:Kcnt1.1	0.251317	chr2	25863273	25864273
ENSMUSG00000035513	0.877487	3.17419	2.63248e-06	7.70822e-05	Ntng2	ENSMUSG00000035513	Ntng2	ENSMUSG00000035513:Ntng2.5	0.251812	chr2	29252506	29253506
ENSMUSG00000027347	1.64204	2.11344	1.32532e-10	7.60074e-09	Rasgrp1	ENSMUSG00000027347	Rasgrp1	ENSMUSG00000027347:Rasgrp1.1	0.260202	chr2	117342377	117343377
ENSMUSG00000026896	4.92573	4.63959	4.09817e-218	2.34149e-215	Ifih1	ENSMUSG00000026896	Ifih1	ENSMUSG00000026896:Ifih1.1	0.260572	chr2	62645656	62646656
ENSMUSG00000026972	0.746955	0.99567	0.0287195	0.261496	Arrdc1	ENSMUSG00000026972	Arrdc1	ENSMUSG00000026972:Arrdc1.3	0.261001	chr2	24934554	24935554
ENSMUSG00000027347	1.64204	2.11344	1.32532e-10	7.60074e-09	Rasgrp1	ENSMUSG00000027347	Rasgrp1	ENSMUSG00000027347:Rasgrp1.3	0.261113	chr2	117342501	117343501
ENSMUSG00000026896	4.92573	4.63959	4.09817e-218	2.34149e-215	Ifih1	ENSMUSG00000026896	Ifih1	ENSMUSG00000026896:Ifih1.2	0.266956	chr2	62645711	62646711
ENSMUSG00000017754	0.999716	1.98041	0.000115637	0.00244475	Pltp	ENSMUSG00000017754	Pltp	ENSMUSG00000017754:Pltp	0.268026	chr2	164856296	164857296
ENSMUSG00000027306	0.638482	6.39943	1.22585e-12	8.35038e-11	Nusap1	ENSMUSG00000027306	Nusap1	ENSMUSG00000027306:Nusap1	0.269392	chr2	119617776	119618776
ENSMUSG00000026896	4.92573	4.63959	4.09817e-218	2.34149e-215	Ifih1	ENSMUSG00000026896	Ifih1	ENSMUSG00000026896:Ifih1.3	0.274309	chr2	62645755	62646755
ENSMUSG00000075416	2.64604	-2.54048	0.00669006	0.0827576	Gm14488	ENSMUSG00000075416	Gm14488	ENSMUSG00000075416:Gm14488	0.281846	chr2	30716543	30717543
ENSMUSG00000054057	1.11883	1.18326	0.000806108	0.0137941	A930004D18Rik	ENSMUSG00000054057	A930004D18Rik	ENSMUSG00000054057:A930004D18Rik.1	0.285796	chr2	18028371	18029371
ENSMUSG00000026972	0.746955	0.99567	0.0287195	0.261496	Arrdc1	ENSMUSG00000026972	Arrdc1	ENSMUSG00000026972:Arrdc1.7	0.287345	chr2	24934752	24935752
ENSMUSG00000054057	1.11883	1.18326	0.000806108	0.0137941	A930004D18Rik	ENSMUSG00000054057	A930004D18Rik	ENSMUSG00000054057:A930004D18Rik	0.289559	chr2	18028260	18029260
ENSMUSG00000026972	0.746955	0.99567	0.0287195	0.261496	Arrdc1	ENSMUSG00000026972	Arrdc1	ENSMUSG00000026972:Arrdc1.4	0.290487	chr2	24934644	24935644
ENSMUSG00000017754	0.999716	1.98041	0.000115637	0.00244475	Pltp	ENSMUSG00000017754	Pltp	ENSMUSG00000017754:Pltp.2	0.29152	chr2	164857127	164858127
ENSMUSG00000005973	1.19775	7.30106	7.25355e-41	1.52786e-38	Rcn1	ENSMUSG00000005973	Rcn1	ENSMUSG00000005973:Rcn1.1	0.294472	chr2	105398819	105399819
ENSMUSG00000026972	0.746955	0.99567	0.0287195	0.261496	Arrdc1	ENSMUSG00000026972	Arrdc1	ENSMUSG00000026972:Arrdc1.5	0.295914	chr2	24934669	24935669
ENSMUSG00000026972	0.746955	0.99567	0.0287195	0.261496	Arrdc1	ENSMUSG00000026972	Arrdc1	ENSMUSG00000026972:Arrdc1.6	0.29657	chr2	24934688	24935688
ENSMUSG00000026888	1.78486	4.01664	6.94785e-35	1.30153e-32	Grb14	ENSMUSG00000026888	Grb14	ENSMUSG00000026888:Grb14.6	0.303245	chr2	65022282	65023282
ENSMUSG00000017754	0.999716	1.98041	0.000115637	0.00244475	Pltp	ENSMUSG00000017754	Pltp	ENSMUSG00000017754:Pltp.3	0.303551	chr2	164857211	164858211
ENSMUSG00000016356	1.12024	4.93316	0.00052744	0.00949516	Col20a1	ENSMUSG00000016356	Col20a1	ENSMUSG00000016356:Col20a1	0.309938	chr2	180986013	180987013
ENSMUSG00000026728	0.562947	8.67156	5.68574e-12	3.67587e-10	Vim	ENSMUSG00000026728	Vim	ENSMUSG00000026728:Vim.1	0.312583	chr2	13573779	13574779
ENSMUSG00000017754	0.999716	1.98041	0.000115637	0.00244475	Pltp	ENSMUSG00000017754	Pltp	ENSMUSG00000017754:Pltp.1	0.31626	chr2	164857042	164858042
ENSMUSG00000040812	1.05917	0.153391	0.011905	0.132012	Agbl2	ENSMUSG00000040812	Agbl2	ENSMUSG00000040812:Agbl2.1	0.3163	chr2	90782729	90783729
ENSMUSG00000058740	1.10551	3.07649	3.90634e-09	1.82568e-07	Kcnt1	ENSMUSG00000058740	Kcnt1	ENSMUSG00000058740:Kcnt1	0.324015	chr2	25863212	25864212
ENSMUSG00000026785	0.988823	0.283131	0.0379442	0.321586	Pkn3	ENSMUSG00000026785	Pkn3	ENSMUSG00000026785:Pkn3.3	0.326374	chr2	30078062	30079062
ENSMUSG00000010505	0.643301	8.13519	1.00112e-15	8.55312e-14	Myt1	ENSMUSG00000010505	Myt1	ENSMUSG00000010505:Myt1.3	0.344865	chr2	181766990	181767990
ENSMUSG00000017929	0.809125	5.59571	1.85417e-17	1.78798e-15	B4galt5	ENSMUSG00000017929	B4galt5	ENSMUSG00000017929:B4galt5.1	0.353411	chr2	167313355	167314355
ENSMUSG00000074923	5.49521	4.38454	1.53215e-206	8.23902e-204	Pak6	ENSMUSG00000074923	Pak6	ENSMUSG00000074923:Pak6.1	0.35517	chr2	118663240	118664240
ENSMUSG00000086425	2.25935	-2.53739	0.0166739	0.172545	F730016J06Rik	ENSMUSG00000086425	F730016J06Rik	ENSMUSG00000086425:F730016J06Rik.1	0.356903	chr2	28117685	28118685
ENSMUSG00000017929	0.809125	5.59571	1.85417e-17	1.78798e-15	B4galt5	ENSMUSG00000017929	B4galt5	ENSMUSG00000017929:B4galt5.2	0.369805	chr2	167313400	167314400
ENSMUSG00000027641	0.832293	5.36865	1.88739e-17	1.81618e-15	Rbl1	ENSMUSG00000027641	Rbl1	ENSMUSG00000027641:Rbl1.1	0.374098	chr2	157204012	157205012
ENSMUSG00000027641	0.832293	5.36865	1.88739e-17	1.81618e-15	Rbl1	ENSMUSG00000027641	Rbl1	ENSMUSG00000027641:Rbl1.2	0.375217	chr2	157204030	157205030
ENSMUSG00000010505	0.643301	8.13519	1.00112e-15	8.55312e-14	Myt1	ENSMUSG00000010505	Myt1	ENSMUSG00000010505:Myt1.2	0.37809	chr2	181766790	181767790
ENSMUSG00000015839	0.865015	5.4972	3.97374e-19	4.30406e-17	Nfe2l2	ENSMUSG00000015839	Nfe2l2	ENSMUSG00000015839:Nfe2l2.1	0.380008	chr2	75704141	75705141
ENSMUSG00000010505	0.643301	8.13519	1.00112e-15	8.55312e-14	Myt1	ENSMUSG00000010505	Myt1	ENSMUSG00000010505:Myt1.1	0.382376	chr2	181766513	181767513
ENSMUSG00000015839	0.865015	5.4972	3.97374e-19	4.30406e-17	Nfe2l2	ENSMUSG00000015839	Nfe2l2	ENSMUSG00000015839:Nfe2l2	0.383071	chr2	75703989	75704989
ENSMUSG00000026785	0.988823	0.283131	0.0379442	0.321586	Pkn3	ENSMUSG00000026785	Pkn3	ENSMUSG00000026785:Pkn3.4	0.387705	chr2	30078176	30079176
ENSMUSG00000027171	1.02778	1.73605	0.000363044	0.00682881	Prrg4	ENSMUSG00000027171	Prrg4	ENSMUSG00000027171:Prrg4	0.396704	chr2	104848993	104849993
ENSMUSG00000006418	1.20732	5.9737	6.41051e-39	1.30227e-36	Rnf114	ENSMUSG00000006418	Rnf114	ENSMUSG00000006418:Rnf114	0.398662	chr2	167492123	167493123
ENSMUSG00000050896	2.12446	-1.00443	0.0004439	0.0081649	Rtn4rl2	ENSMUSG00000050896	Rtn4rl2	ENSMUSG00000050896:Rtn4rl2.2	0.40706	chr2	84886210	84887210
ENSMUSG00000026728	0.562947	8.67156	5.68574e-12	3.67587e-10	Vim	ENSMUSG00000026728	Vim	ENSMUSG00000026728:Vim	0.412183	chr2	13573417	13574417
ENSMUSG00000050896	2.12446	-1.00443	0.0004439	0.0081649	Rtn4rl2	ENSMUSG00000050896	Rtn4rl2	ENSMUSG00000050896:Rtn4rl2.1	0.415663	chr2	84886192	84887192
ENSMUSG00000037683	6.77552	-2.27046	6.25295e-07	2.06959e-05	Armc3	ENSMUSG00000037683	Armc3	ENSMUSG00000037683:Armc3	0.41784	chr2	19198780	19199780
ENSMUSG00000050896	2.12446	-1.00443	0.0004439	0.0081649	Rtn4rl2	ENSMUSG00000050896	Rtn4rl2	ENSMUSG00000050896:Rtn4rl2	0.419833	chr2	84885976	84886976
ENSMUSG00000074771	1.69952	-1.78886	0.0107005	0.121124	Ankef1	ENSMUSG00000074771	Ankef1	ENSMUSG00000074771:Ankef1.3	0.421766	chr2	136531690	136532690
ENSMUSG00000074771	1.69952	-1.78886	0.0107005	0.121124	Ankef1	ENSMUSG00000074771	Ankef1	ENSMUSG00000074771:Ankef1.4	0.426156	chr2	136531758	136532758
ENSMUSG00000027296	3.03035	-0.202064	3.66662e-09	1.72421e-07	Itpka	ENSMUSG00000027296	Itpka	ENSMUSG00000027296:Itpka	0.428719	chr2	119741815	119742815
ENSMUSG00000005087	1.06341	5.21705	6.02807e-21	7.15665e-19	Cd44	ENSMUSG00000005087	Cd44	ENSMUSG00000005087:Cd44	0.434288	chr2	102900848	102901848
ENSMUSG00000010505	0.643301	8.13519	1.00112e-15	8.55312e-14	Myt1	ENSMUSG00000010505	Myt1	ENSMUSG00000010505:Myt1	0.437641	chr2	181762810	181763810
ENSMUSG00000017697	1.20264	2.14859	1.47462e-06	4.5542e-05	Ada	ENSMUSG00000017697	Ada	ENSMUSG00000017697:Ada.1	0.441904	chr2	163749739	163750739
ENSMUSG00000005087	1.06341	5.21705	6.02807e-21	7.15665e-19	Cd44	ENSMUSG00000005087	Cd44	ENSMUSG00000005087:Cd44.2	0.442096	chr2	102900958	102901958
ENSMUSG00000005087	1.06341	5.21705	6.02807e-21	7.15665e-19	Cd44	ENSMUSG00000005087	Cd44	ENSMUSG00000005087:Cd44.1	0.442638	chr2	102900869	102901869
ENSMUSG00000027171	1.02778	1.73605	0.000363044	0.00682881	Prrg4	ENSMUSG00000027171	Prrg4	ENSMUSG00000027171:Prrg4.1	0.447799	chr2	104849376	104850376
ENSMUSG00000017861	0.798422	4.4784	4.51153e-11	2.68158e-09	Mybl2	ENSMUSG00000017861	Mybl2	ENSMUSG00000017861:Mybl2	0.462903	chr2	163054165	163055165
ENSMUSG00000023206	1.75202	3.37585	2.37099e-18	2.40829e-16	Il15ra	ENSMUSG00000023206	Il15ra	ENSMUSG00000023206:Il15ra.1	0.465801	chr2	11704921	11705921
ENSMUSG00000005087	1.06341	5.21705	6.02807e-21	7.15665e-19	Cd44	ENSMUSG00000005087	Cd44	ENSMUSG00000005087:Cd44.5	0.474748	chr2	102901125	102902125
ENSMUSG00000005087	1.06341	5.21705	6.02807e-21	7.15665e-19	Cd44	ENSMUSG00000005087	Cd44	ENSMUSG00000005087:Cd44.3	0.477608	chr2	102900995	102901995
ENSMUSG00000005087	1.06341	5.21705	6.02807e-21	7.15665e-19	Cd44	ENSMUSG00000005087	Cd44	ENSMUSG00000005087:Cd44.4	0.480412	chr2	102901010	102902010
ENSMUSG00000005087	1.06341	5.21705	6.02807e-21	7.15665e-19	Cd44	ENSMUSG00000005087	Cd44	ENSMUSG00000005087:Cd44.6	0.480452	chr2	102901165	102902165
ENSMUSG00000026970	1.63804	3.82991	2.27144e-26	3.40404e-24	Rbms1	ENSMUSG00000026970	Rbms1	ENSMUSG00000026970:Rbms1.3	0.488462	chr2	60880970	60881970
ENSMUSG00000026970	1.63804	3.82991	2.27144e-26	3.40404e-24	Rbms1	ENSMUSG00000026970	Rbms1	ENSMUSG00000026970:Rbms1.2	0.489083	chr2	60880938	60881938
ENSMUSG00000074923	5.49521	4.38454	1.53215e-206	8.23902e-204	Pak6	ENSMUSG00000074923	Pak6	ENSMUSG00000074923:Pak6	0.493089	chr2	118662781	118663781
ENSMUSG00000027962	1.32694	4.87939	8.72091e-15	6.87268e-13	Vcam1	ENSMUSG00000027962	Vcam1	ENSMUSG00000027962:Vcam1.2	0.00335287	chr3	116128957	116129957
ENSMUSG00000097040	0.524369	1.99821	0.0407939	0.336268	2610316D01Rik	ENSMUSG00000097040	2610316D01Rik	ENSMUSG00000097040:2610316D01Rik.1	0.0050437	chr3	45377705	45378705
ENSMUSG00000097040	0.524369	1.99821	0.0407939	0.336268	2610316D01Rik	ENSMUSG00000097040	2610316D01Rik	ENSMUSG00000097040:2610316D01Rik.2	0.0071808	chr3	45377760	45378760
ENSMUSG00000046688	1.44347	1.18054	1.65578e-05	0.000416296	Tifa	ENSMUSG00000046688	Tifa	ENSMUSG00000046688:Tifa.3	0.00986448	chr3	127790282	127791282
ENSMUSG00000027962	1.32694	4.87939	8.72091e-15	6.87268e-13	Vcam1	ENSMUSG00000027962	Vcam1	ENSMUSG00000027962:Vcam1.1	0.0103379	chr3	116128428	116129428
ENSMUSG00000027715	0.577356	7.35599	5.40696e-10	2.82771e-08	Ccna2	ENSMUSG00000027715	Ccna2	ENSMUSG00000027715:Ccna2.2	0.0140534	chr3	36571427	36572427
ENSMUSG00000028176	0.832662	4.5765	2.25141e-12	1.50011e-10	Lrrc7	ENSMUSG00000028176	Lrrc7	ENSMUSG00000028176:Lrrc7.1	0.014429	chr3	158560841	158561841
ENSMUSG00000027715	0.577356	7.35599	5.40696e-10	2.82771e-08	Ccna2	ENSMUSG00000027715	Ccna2	ENSMUSG00000027715:Ccna2.3	0.0185781	chr3	36571464	36572464
ENSMUSG00000027715	0.577356	7.35599	5.40696e-10	2.82771e-08	Ccna2	ENSMUSG00000027715	Ccna2	ENSMUSG00000027715:Ccna2.4	0.021018	chr3	36571650	36572650
ENSMUSG00000027947	1.1615	0.384369	0.0442617	0.358107	Il6ra	ENSMUSG00000027947	Il6ra	ENSMUSG00000027947:Il6ra.1	0.0225691	chr3	89912696	89913696
ENSMUSG00000045328	0.639739	6.70173	1.35189e-10	7.71438e-09	Cenpe	ENSMUSG00000045328	Cenpe	ENSMUSG00000045328:Cenpe	0.0239319	chr3	135212015	135213015
ENSMUSG00000025758	0.503381	4.58178	1.92408e-05	0.000477966	Plk4	ENSMUSG00000025758	Plk4	ENSMUSG00000025758:Plk4	0.0293669	chr3	40799514	40800514
ENSMUSG00000085956	1.22808	-1.04475	0.0264834	0.247413	4930481B07Rik	ENSMUSG00000085956	4930481B07Rik	ENSMUSG00000085956:4930481B07Rik.1	0.0294241	chr3	95015727	95016727
ENSMUSG00000027947	1.1615	0.384369	0.0442617	0.358107	Il6ra	ENSMUSG00000027947	Il6ra	ENSMUSG00000027947:Il6ra	0.0294801	chr3	89912662	89913662
ENSMUSG00000039717	1.23452	2.19857	8.41703e-07	2.71507e-05	Ralyl	ENSMUSG00000039717	Ralyl	ENSMUSG00000039717:Ralyl.1	0.0323415	chr3	13472698	13473698
ENSMUSG00000033308	0.553793	3.52034	0.00553605	0.0707611	Dpyd	ENSMUSG00000033308	Dpyd	ENSMUSG00000033308:Dpyd	0.0335417	chr3	118561635	118562635
ENSMUSG00000068874	1.42206	1.89441	1.5764e-07	5.76434e-06	Selenbp1	ENSMUSG00000068874	Selenbp1	ENSMUSG00000068874:Selenbp1	0.0390818	chr3	94932585	94933585
ENSMUSG00000068696	2.7407	-2.3707	0.00418793	0.0561519	Gpr88	ENSMUSG00000068696	Gpr88	ENSMUSG00000068696:Gpr88	0.0413661	chr3	116252589	116253589
ENSMUSG00000027533	0.605648	7.67763	0.00860096	0.101591	Fabp5	ENSMUSG00000027533	Fabp5	ENSMUSG00000027533:Fabp5.1	0.0456484	chr3	10012083	10013083
ENSMUSG00000053931	0.51021	8.05026	2.502e-10	1.35499e-08	Cnn3	ENSMUSG00000053931	Cnn3	ENSMUSG00000053931:Cnn3.2	0.0460214	chr3	121426760	121427760
ENSMUSG00000039717	1.23452	2.19857	8.41703e-07	2.71507e-05	Ralyl	ENSMUSG00000039717	Ralyl	ENSMUSG00000039717:Ralyl	0.0484256	chr3	13471146	13472146
ENSMUSG00000027962	1.32694	4.87939	8.72091e-15	6.87268e-13	Vcam1	ENSMUSG00000027962	Vcam1	ENSMUSG00000027962:Vcam1.3	0.0515451	chr3	116129188	116130188
ENSMUSG00000027951	1.23755	6.72475	4.46714e-49	1.05795e-46	Adar	ENSMUSG00000027951	Adar	ENSMUSG00000027951:Adar	0.0522953	chr3	89714500	89715500
ENSMUSG00000053819	1.01944	6.04117	9.75331e-30	1.67596e-27	Camk2d	ENSMUSG00000053819	Camk2d	ENSMUSG00000053819:Camk2d.5	0.052539	chr3	126596884	126597884
ENSMUSG00000027533	0.605648	7.67763	0.00860096	0.101591	Fabp5	ENSMUSG00000027533	Fabp5	ENSMUSG00000027533:Fabp5	0.0534863	chr3	10012026	10013026
ENSMUSG00000027951	1.23755	6.72475	4.46714e-49	1.05795e-46	Adar	ENSMUSG00000027951	Adar	ENSMUSG00000027951:Adar.1	0.0562271	chr3	89714810	89715810
ENSMUSG00000028068	0.814584	5.42419	0.000383617	0.00718621	Iqgap3	ENSMUSG00000028068	Iqgap3	ENSMUSG00000028068:Iqgap3	0.0643749	chr3	88081477	88082477
ENSMUSG00000025758	0.503381	4.58178	1.92408e-05	0.000477966	Plk4	ENSMUSG00000025758	Plk4	ENSMUSG00000025758:Plk4.1	0.0707013	chr3	40799732	40800732
ENSMUSG00000084530	7.24684	-1.96438	1.54592e-08	6.47671e-07	NA	ENSMUSG00000084530	RF01953	ENSMUSG00000084530:AC137708.1	0.0714147	chr3	34637846	34638846
ENSMUSG00000027699	0.503319	6.25489	1.06744e-05	0.000276749	Ect2	ENSMUSG00000027699	Ect2	ENSMUSG00000027699:Ect2.4	0.0748676	chr3	27153282	27154282
ENSMUSG00000027699	0.503319	6.25489	1.06744e-05	0.000276749	Ect2	ENSMUSG00000027699	Ect2	ENSMUSG00000027699:Ect2.5	0.0749383	chr3	27153311	27154311
ENSMUSG00000028040	1.07611	-0.163625	0.0182046	0.18537	Efna4	ENSMUSG00000028040	Efna4	ENSMUSG00000028040:Efna4	0.0789952	chr3	89337528	89338528
ENSMUSG00000053819	1.01944	6.04117	9.75331e-30	1.67596e-27	Camk2d	ENSMUSG00000053819	Camk2d	ENSMUSG00000053819:Camk2d.4	0.0801185	chr3	126596802	126597802
ENSMUSG00000027699	0.503319	6.25489	1.06744e-05	0.000276749	Ect2	ENSMUSG00000027699	Ect2	ENSMUSG00000027699:Ect2.7	0.0801889	chr3	27153356	27154356
ENSMUSG00000027699	0.503319	6.25489	1.06744e-05	0.000276749	Ect2	ENSMUSG00000027699	Ect2	ENSMUSG00000027699:Ect2.8	0.080283	chr3	27153378	27154378
ENSMUSG00000027699	0.503319	6.25489	1.06744e-05	0.000276749	Ect2	ENSMUSG00000027699	Ect2	ENSMUSG00000027699:Ect2.6	0.0807293	chr3	27153328	27154328
ENSMUSG00000036334	1.05204	4.99578	7.17393e-23	9.53215e-21	Igsf10	ENSMUSG00000036334	Igsf10	ENSMUSG00000036334:Igsf10	0.080826	chr3	59343659	59344659
ENSMUSG00000004035	0.571978	4.34868	7.87964e-06	0.000209548	Gstm7	ENSMUSG00000004035	Gstm7	ENSMUSG00000004035:Gstm7.2	0.0840921	chr3	107931167	107932167
ENSMUSG00000040213	1.49383	3.40225	2.92521e-16	2.59119e-14	Kyat3	ENSMUSG00000040213	Kyat3	ENSMUSG00000040213:Kyat3	0.0850071	chr3	142700550	142701550
ENSMUSG00000086392	1.21261	-0.777924	0.0177413	0.181374	Mccc1os	ENSMUSG00000086392	Mccc1os	ENSMUSG00000086392:Mccc1os.1	0.0855381	chr3	35999391	36000391
ENSMUSG00000004035	0.571978	4.34868	7.87964e-06	0.000209548	Gstm7	ENSMUSG00000004035	Gstm7	ENSMUSG00000004035:Gstm7	0.0858359	chr3	107931079	107932079
ENSMUSG00000004035	0.571978	4.34868	7.87964e-06	0.000209548	Gstm7	ENSMUSG00000004035	Gstm7	ENSMUSG00000004035:Gstm7.3	0.0859604	chr3	107931317	107932317
ENSMUSG00000004035	0.571978	4.34868	7.87964e-06	0.000209548	Gstm7	ENSMUSG00000004035	Gstm7	ENSMUSG00000004035:Gstm7.1	0.0864111	chr3	107931112	107932112
ENSMUSG00000068696	2.7407	-2.3707	0.00418793	0.0561519	Gpr88	ENSMUSG00000068696	Gpr88	ENSMUSG00000068696:Gpr88.1	0.087732	chr3	116252963	116253963
ENSMUSG00000053819	1.01944	6.04117	9.75331e-30	1.67596e-27	Camk2d	ENSMUSG00000053819	Camk2d	ENSMUSG00000053819:Camk2d.1	0.0893189	chr3	126596471	126597471
ENSMUSG00000053819	1.01944	6.04117	9.75331e-30	1.67596e-27	Camk2d	ENSMUSG00000053819	Camk2d	ENSMUSG00000053819:Camk2d.3	0.0895833	chr3	126596684	126597684
ENSMUSG00000027715	0.577356	7.35599	5.40696e-10	2.82771e-08	Ccna2	ENSMUSG00000027715	Ccna2	ENSMUSG00000027715:Ccna2.1	0.0912482	chr3	36571051	36572051
ENSMUSG00000068749	0.515532	5.9204	1.2926e-08	5.4909e-07	Psma5	ENSMUSG00000068749	Psma5	ENSMUSG00000068749:Psma5	0.0941355	chr3	108256404	108257404
ENSMUSG00000053819	1.01944	6.04117	9.75331e-30	1.67596e-27	Camk2d	ENSMUSG00000053819	Camk2d	ENSMUSG00000053819:Camk2d.2	0.094346	chr3	126596575	126597575
ENSMUSG00000068696	2.7407	-2.3707	0.00418793	0.0561519	Gpr88	ENSMUSG00000068696	Gpr88	ENSMUSG00000068696:Gpr88.2	0.0977522	chr3	116253003	116254003
ENSMUSG00000036334	1.05204	4.99578	7.17393e-23	9.53215e-21	Igsf10	ENSMUSG00000036334	Igsf10	ENSMUSG00000036334:Igsf10.1	0.0994815	chr3	59343756	59344756
ENSMUSG00000106515	2.88569	-3.27958	0.0261628	0.244888	Gm30382	ENSMUSG00000106515	Gm30382	ENSMUSG00000106515:Gm30382.1	0.0995937	chr3	149444776	149445776
ENSMUSG00000027864	0.708988	6.23423	5.30124e-16	4.65979e-14	Ptgfrn	ENSMUSG00000027864	Ptgfrn	ENSMUSG00000027864:Ptgfrn.2	0.101104	chr3	101109778	101110778
ENSMUSG00000106022	0.663611	1.34786	0.0394456	0.328113	Gm42929	ENSMUSG00000106022	Gm42929	ENSMUSG00000106022:Gm42929	0.101378	chr3	121427524	121428524
ENSMUSG00000027840	2.1636	0.540681	1.0765e-06	3.41462e-05	Wnt2b	ENSMUSG00000027840	Wnt2b	ENSMUSG00000027840:Wnt2b	0.10348	chr3	104961221	104962221
ENSMUSG00000106515	2.88569	-3.27958	0.0261628	0.244888	Gm30382	ENSMUSG00000106515	Gm30382	ENSMUSG00000106515:Gm30382.2	0.109764	chr3	149444801	149445801
ENSMUSG00000027748	4.49163	1.96906	2.45832e-37	4.82252e-35	Trpc4	ENSMUSG00000027748	Trpc4	ENSMUSG00000027748:Trpc4	0.111907	chr3	54155547	54156547
ENSMUSG00000028176	0.832662	4.5765	2.25141e-12	1.50011e-10	Lrrc7	ENSMUSG00000028176	Lrrc7	ENSMUSG00000028176:Lrrc7.2	0.113826	chr3	158561634	158562634
ENSMUSG00000027935	1.60206	2.97402	3.88555e-12	2.54807e-10	Rab13	ENSMUSG00000027935	Rab13	ENSMUSG00000027935:Rab13.1	0.11444	chr3	90220265	90221265
ENSMUSG00000085956	1.22808	-1.04475	0.0264834	0.247413	4930481B07Rik	ENSMUSG00000085956	4930481B07Rik	ENSMUSG00000085956:4930481B07Rik	0.115157	chr3	95015103	95016103
ENSMUSG00000086392	1.21261	-0.777924	0.0177413	0.181374	Mccc1os	ENSMUSG00000086392	Mccc1os	ENSMUSG00000086392:Mccc1os	0.116856	chr3	35999311	36000311
ENSMUSG00000036334	1.05204	4.99578	7.17393e-23	9.53215e-21	Igsf10	ENSMUSG00000036334	Igsf10	ENSMUSG00000036334:Igsf10.2	0.11723	chr3	59343894	59344894
ENSMUSG00000027840	2.1636	0.540681	1.0765e-06	3.41462e-05	Wnt2b	ENSMUSG00000027840	Wnt2b	ENSMUSG00000027840:Wnt2b.1	0.121978	chr3	104961421	104962421
ENSMUSG00000053819	1.01944	6.04117	9.75331e-30	1.67596e-27	Camk2d	ENSMUSG00000053819	Camk2d	ENSMUSG00000053819:Camk2d	0.125127	chr3	126595780	126596780
ENSMUSG00000028266	0.692988	7.6639	4.90294e-18	4.9038e-16	Lmo4	ENSMUSG00000028266	Lmo4	ENSMUSG00000028266:Lmo4.5	0.125264	chr3	144204680	144205680
ENSMUSG00000085084	1.04619	3.37616	4.59942e-09	2.11287e-07	4930570G19Rik	ENSMUSG00000085084	4930570G19Rik	ENSMUSG00000085084:4930570G19Rik.3	0.127969	chr3	156561246	156562246
ENSMUSG00000085084	1.04619	3.37616	4.59942e-09	2.11287e-07	4930570G19Rik	ENSMUSG00000085084	4930570G19Rik	ENSMUSG00000085084:4930570G19Rik.2	0.128201	chr3	156561187	156562187
ENSMUSG00000104969	1.0214	2.90116	2.55098e-07	8.92803e-06	Gm43445	ENSMUSG00000104969	Gm43445	ENSMUSG00000104969:Gm43445	0.128664	chr3	144198762	144199762
ENSMUSG00000085084	1.04619	3.37616	4.59942e-09	2.11287e-07	4930570G19Rik	ENSMUSG00000085084	4930570G19Rik	ENSMUSG00000085084:4930570G19Rik.1	0.129801	chr3	156561175	156562175
ENSMUSG00000046688	1.44347	1.18054	1.65578e-05	0.000416296	Tifa	ENSMUSG00000046688	Tifa	ENSMUSG00000046688:Tifa.2	0.129886	chr3	127790133	127791133
ENSMUSG00000028176	0.832662	4.5765	2.25141e-12	1.50011e-10	Lrrc7	ENSMUSG00000028176	Lrrc7	ENSMUSG00000028176:Lrrc7.3	0.131195	chr3	158561721	158562721
ENSMUSG00000028266	0.692988	7.6639	4.90294e-18	4.9038e-16	Lmo4	ENSMUSG00000028266	Lmo4	ENSMUSG00000028266:Lmo4.6	0.13355	chr3	144204720	144205720
ENSMUSG00000053931	0.51021	8.05026	2.502e-10	1.35499e-08	Cnn3	ENSMUSG00000053931	Cnn3	ENSMUSG00000053931:Cnn3.1	0.135419	chr3	121426248	121427248
ENSMUSG00000097804	9.28324	0.0885554	3.51284e-23	4.70865e-21	Gm16685	ENSMUSG00000097804	Gm16685	ENSMUSG00000097804:Gm16685	0.137145	chr3	7612183	7613183
ENSMUSG00000013707	3.49117	-2.86036	0.00263672	0.0379469	Tnfaip8l2	ENSMUSG00000013707	Tnfaip8l2	ENSMUSG00000013707:Tnfaip8l2	0.139206	chr3	95141860	95142860
ENSMUSG00000085084	1.04619	3.37616	4.59942e-09	2.11287e-07	4930570G19Rik	ENSMUSG00000085084	4930570G19Rik	ENSMUSG00000085084:4930570G19Rik	0.142342	chr3	156561082	156562082
ENSMUSG00000036834	0.546547	3.31777	0.00229611	0.0339726	Plch1	ENSMUSG00000036834	Plch1	ENSMUSG00000036834:Plch1.9	0.145615	chr3	63898942	63899942
ENSMUSG00000036834	0.546547	3.31777	0.00229611	0.0339726	Plch1	ENSMUSG00000036834	Plch1	ENSMUSG00000036834:Plch1.8	0.148338	chr3	63898873	63899873
ENSMUSG00000034349	0.504914	7.02178	2.14053e-09	1.03974e-07	Smc4	ENSMUSG00000034349	Smc4	ENSMUSG00000034349:Smc4.1	0.150396	chr3	69004470	69005470
ENSMUSG00000027966	0.586584	9.16211	4.92591e-11	2.92028e-09	Col11a1	ENSMUSG00000027966	Col11a1	ENSMUSG00000027966:Col11a1	0.150844	chr3	114030018	114031018
ENSMUSG00000014599	2.17111	6.92557	8.5378e-140	3.61339e-137	Csf1	ENSMUSG00000014599	Csf1	ENSMUSG00000014599:Csf1.2	0.151141	chr3	107759721	107760721
ENSMUSG00000027935	1.60206	2.97402	3.88555e-12	2.54807e-10	Rab13	ENSMUSG00000027935	Rab13	ENSMUSG00000027935:Rab13	0.152573	chr3	90213180	90214180
ENSMUSG00000014599	2.17111	6.92557	8.5378e-140	3.61339e-137	Csf1	ENSMUSG00000014599	Csf1	ENSMUSG00000014599:Csf1.3	0.153015	chr3	107759739	107760739
ENSMUSG00000036834	0.546547	3.31777	0.00229611	0.0339726	Plch1	ENSMUSG00000036834	Plch1	ENSMUSG00000036834:Plch1.10	0.154672	chr3	63898972	63899972
ENSMUSG00000027966	0.586584	9.16211	4.92591e-11	2.92028e-09	Col11a1	ENSMUSG00000027966	Col11a1	ENSMUSG00000027966:Col11a1.1	0.155456	chr3	114030112	114031112
ENSMUSG00000028098	0.7306	6.01272	1.15247e-15	9.79124e-14	Rnf115	ENSMUSG00000028098	Rnf115	ENSMUSG00000028098:Rnf115.1	0.155562	chr3	96727317	96728317
ENSMUSG00000053931	0.51021	8.05026	2.502e-10	1.35499e-08	Cnn3	ENSMUSG00000053931	Cnn3	ENSMUSG00000053931:Cnn3	0.155759	chr3	121425999	121426999
ENSMUSG00000105284	0.973343	-0.190018	0.0312298	0.278473	Gm42693	ENSMUSG00000105284	Gm42693	ENSMUSG00000105284:Gm42693	0.157035	chr3	34663789	34664789
ENSMUSG00000086392	1.21261	-0.777924	0.0177413	0.181374	Mccc1os	ENSMUSG00000086392	Mccc1os	ENSMUSG00000086392:Mccc1os.2	0.160829	chr3	35999913	36000913
ENSMUSG00000034349	0.504914	7.02178	2.14053e-09	1.03974e-07	Smc4	ENSMUSG00000034349	Smc4	ENSMUSG00000034349:Smc4	0.162181	chr3	69004216	69005216
ENSMUSG00000028098	0.7306	6.01272	1.15247e-15	9.79124e-14	Rnf115	ENSMUSG00000028098	Rnf115	ENSMUSG00000028098:Rnf115	0.167664	chr3	96727146	96728146
ENSMUSG00000014599	2.17111	6.92557	8.5378e-140	3.61339e-137	Csf1	ENSMUSG00000014599	Csf1	ENSMUSG00000014599:Csf1.4	0.169365	chr3	107759969	107760969
ENSMUSG00000027997	0.845892	3.01036	9.63325e-06	0.00025233	Casp6	ENSMUSG00000027997	Casp6	ENSMUSG00000027997:Casp6	0.169598	chr3	129900941	129901941
ENSMUSG00000028063	0.989817	4.43919	1.81068e-16	1.62918e-14	Lmna	ENSMUSG00000028063	Lmna	ENSMUSG00000028063:Lmna.4	0.171956	chr3	88502836	88503836
ENSMUSG00000028063	0.989817	4.43919	1.81068e-16	1.62918e-14	Lmna	ENSMUSG00000028063	Lmna	ENSMUSG00000028063:Lmna.3	0.17196	chr3	88502807	88503807
ENSMUSG00000039717	1.23452	2.19857	8.41703e-07	2.71507e-05	Ralyl	ENSMUSG00000039717	Ralyl	ENSMUSG00000039717:Ralyl.3	0.179261	chr3	13945880	13946880
ENSMUSG00000046688	1.44347	1.18054	1.65578e-05	0.000416296	Tifa	ENSMUSG00000046688	Tifa	ENSMUSG00000046688:Tifa.1	0.187537	chr3	127789389	127790389
ENSMUSG00000041263	0.756441	2.86934	0.000135916	0.00283028	Rusc1	ENSMUSG00000041263	Rusc1	ENSMUSG00000041263:Rusc1.2	0.191105	chr3	89089475	89090475
ENSMUSG00000041263	0.756441	2.86934	0.000135916	0.00283028	Rusc1	ENSMUSG00000041263	Rusc1	ENSMUSG00000041263:Rusc1.3	0.191386	chr3	89089545	89090545
ENSMUSG00000040329	2.41262	0.0264546	4.99083e-07	1.67122e-05	Il7	ENSMUSG00000040329	Il7	ENSMUSG00000040329:Il7.1	0.196703	chr3	7612393	7613393
ENSMUSG00000028078	1.0253	7.80949	2.90279e-27	4.48245e-25	Dclk2	ENSMUSG00000028078	Dclk2	ENSMUSG00000028078:Dclk2.4	0.20684	chr3	86919688	86920688
ENSMUSG00000028078	1.0253	7.80949	2.90279e-27	4.48245e-25	Dclk2	ENSMUSG00000028078	Dclk2	ENSMUSG00000028078:Dclk2.3	0.212193	chr3	86919670	86920670
ENSMUSG00000025758	0.503381	4.58178	1.92408e-05	0.000477966	Plk4	ENSMUSG00000025758	Plk4	ENSMUSG00000025758:Plk4.2	0.215496	chr3	40800259	40801259
ENSMUSG00000028266	0.692988	7.6639	4.90294e-18	4.9038e-16	Lmo4	ENSMUSG00000028266	Lmo4	ENSMUSG00000028266:Lmo4.2	0.217067	chr3	144201832	144202832
ENSMUSG00000028266	0.692988	7.6639	4.90294e-18	4.9038e-16	Lmo4	ENSMUSG00000028266	Lmo4	ENSMUSG00000028266:Lmo4.1	0.219036	chr3	144201800	144202800
ENSMUSG00000028266	0.692988	7.6639	4.90294e-18	4.9038e-16	Lmo4	ENSMUSG00000028266	Lmo4	ENSMUSG00000028266:Lmo4.3	0.219411	chr3	144201896	144202896
ENSMUSG00000003617	0.841861	3.7072	1.17541e-06	3.70266e-05	Cp	ENSMUSG00000003617	Cp	ENSMUSG00000003617:Cp.2	0.220243	chr3	19956762	19957762
ENSMUSG00000038354	2.00887	-1.17074	0.000503412	0.00911286	Ankrd35	ENSMUSG00000038354	Ankrd35	ENSMUSG00000038354:Ankrd35.1	0.220845	chr3	96669805	96670805
ENSMUSG00000003617	0.841861	3.7072	1.17541e-06	3.70266e-05	Cp	ENSMUSG00000003617	Cp	ENSMUSG00000003617:Cp.1	0.224461	chr3	19956697	19957697
ENSMUSG00000046688	1.44347	1.18054	1.65578e-05	0.000416296	Tifa	ENSMUSG00000046688	Tifa	ENSMUSG00000046688:Tifa	0.224598	chr3	127789283	127790283
ENSMUSG00000051278	0.653839	4.56839	1.02432e-08	4.45055e-07	Zgrf1	ENSMUSG00000051278	Zgrf1	ENSMUSG00000051278:Zgrf1	0.224695	chr3	127552973	127553973
ENSMUSG00000028078	1.0253	7.80949	2.90279e-27	4.48245e-25	Dclk2	ENSMUSG00000028078	Dclk2	ENSMUSG00000028078:Dclk2.6	0.229988	chr3	86919877	86920877
ENSMUSG00000050931	0.804205	2.68079	0.000141123	0.00292109	Sgms2	ENSMUSG00000050931	Sgms2	ENSMUSG00000050931:Sgms2.1	0.230391	chr3	131489979	131490979
ENSMUSG00000028078	1.0253	7.80949	2.90279e-27	4.48245e-25	Dclk2	ENSMUSG00000028078	Dclk2	ENSMUSG00000028078:Dclk2.7	0.23074	chr3	86920352	86921352
ENSMUSG00000038354	2.00887	-1.17074	0.000503412	0.00911286	Ankrd35	ENSMUSG00000038354	Ankrd35	ENSMUSG00000038354:Ankrd35	0.232171	chr3	96669609	96670609
ENSMUSG00000051278	0.653839	4.56839	1.02432e-08	4.45055e-07	Zgrf1	ENSMUSG00000051278	Zgrf1	ENSMUSG00000051278:Zgrf1.1	0.232719	chr3	127553111	127554111
ENSMUSG00000027748	4.49163	1.96906	2.45832e-37	4.82252e-35	Trpc4	ENSMUSG00000027748	Trpc4	ENSMUSG00000027748:Trpc4.1	0.234645	chr3	54155851	54156851
ENSMUSG00000028078	1.0253	7.80949	2.90279e-27	4.48245e-25	Dclk2	ENSMUSG00000028078	Dclk2	ENSMUSG00000028078:Dclk2.5	0.234665	chr3	86919835	86920835
ENSMUSG00000003617	0.841861	3.7072	1.17541e-06	3.70266e-05	Cp	ENSMUSG00000003617	Cp	ENSMUSG00000003617:Cp	0.236653	chr3	19956560	19957560
ENSMUSG00000038393	1.22711	2.66286	1.32955e-07	4.93271e-06	Txnip	ENSMUSG00000038393	Txnip	ENSMUSG00000038393:Txnip	0.239413	chr3	96557436	96558436
ENSMUSG00000041263	0.756441	2.86934	0.000135916	0.00283028	Rusc1	ENSMUSG00000041263	Rusc1	ENSMUSG00000041263:Rusc1.1	0.243944	chr3	89089255	89090255
ENSMUSG00000041263	0.756441	2.86934	0.000135916	0.00283028	Rusc1	ENSMUSG00000041263	Rusc1	ENSMUSG00000041263:Rusc1	0.251998	chr3	89089241	89090241
ENSMUSG00000056025	4.98605	2.50645	6.06907e-59	1.65122e-56	Clca3a1	ENSMUSG00000056025	Clca3a1	ENSMUSG00000056025:Clca3a1.1	0.25535	chr3	144760477	144761477
ENSMUSG00000037737	4.68569	-3.48561	0.00609066	0.0764184	Actrt3	ENSMUSG00000037737	Actrt3	ENSMUSG00000037737:Actrt3	0.257226	chr3	30599439	30600439
ENSMUSG00000041263	0.756441	2.86934	0.000135916	0.00283028	Rusc1	ENSMUSG00000041263	Rusc1	ENSMUSG00000041263:Rusc1.4	0.270019	chr3	89092790	89093790
ENSMUSG00000028076	0.849075	2.65678	0.000398007	0.00743141	Cd1d1	ENSMUSG00000028076	Cd1d1	ENSMUSG00000028076:Cd1d1.2	0.278638	chr3	86998809	86999809
ENSMUSG00000041263	0.756441	2.86934	0.000135916	0.00283028	Rusc1	ENSMUSG00000041263	Rusc1	ENSMUSG00000041263:Rusc1.5	0.278686	chr3	89092811	89093811
ENSMUSG00000028076	0.849075	2.65678	0.000398007	0.00743141	Cd1d1	ENSMUSG00000028076	Cd1d1	ENSMUSG00000028076:Cd1d1.1	0.278912	chr3	86998454	86999454
ENSMUSG00000027848	1.55061	2.2964	9.83421e-10	5.00559e-08	Olfml3	ENSMUSG00000027848	Olfml3	ENSMUSG00000027848:Olfml3.1	0.283721	chr3	103733729	103734729
ENSMUSG00000028076	0.849075	2.65678	0.000398007	0.00743141	Cd1d1	ENSMUSG00000028076	Cd1d1	ENSMUSG00000028076:Cd1d1.3	0.286976	chr3	86998841	86999841
ENSMUSG00000046743	0.962615	6.33441	9.27728e-06	0.000243705	Fat4	ENSMUSG00000046743	Fat4	ENSMUSG00000046743:Fat4	0.288276	chr3	38886418	38887418
ENSMUSG00000056025	4.98605	2.50645	6.06907e-59	1.65122e-56	Clca3a1	ENSMUSG00000056025	Clca3a1	ENSMUSG00000056025:Clca3a1	0.296047	chr3	144760341	144761341
ENSMUSG00000027977	2.22226	2.18464	2.49669e-16	2.2159e-14	Ndst3	ENSMUSG00000027977	Ndst3	ENSMUSG00000027977:Ndst3.6	0.298378	chr3	123689780	123690780
ENSMUSG00000027827	1.12635	-0.805321	0.0307765	0.275992	Kcnab1	ENSMUSG00000027827	Kcnab1	ENSMUSG00000027827:Kcnab1.2	0.305314	chr3	65108862	65109862
ENSMUSG00000028076	0.849075	2.65678	0.000398007	0.00743141	Cd1d1	ENSMUSG00000028076	Cd1d1	ENSMUSG00000028076:Cd1d1.4	0.314622	chr3	86998941	86999941
ENSMUSG00000068744	0.88805	4.91225	1.44642e-14	1.11866e-12	Psrc1	ENSMUSG00000068744	Psrc1	ENSMUSG00000068744:Psrc1	0.340762	chr3	108383366	108384366
ENSMUSG00000027907	0.706564	2.94762	0.000768504	0.0132155	S100a11	ENSMUSG00000027907	S100a11	ENSMUSG00000027907:S100a11	0.346407	chr3	93519966	93520966
ENSMUSG00000028268	5.60371	8.1499	0	0	Gbp3	ENSMUSG00000028268	Gbp3	ENSMUSG00000028268:Gbp3.3	0.357673	chr3	142560712	142561712
ENSMUSG00000028063	0.989817	4.43919	1.81068e-16	1.62918e-14	Lmna	ENSMUSG00000028063	Lmna	ENSMUSG00000028063:Lmna.5	0.365855	chr3	88509456	88510456
ENSMUSG00000092242	0.70608	1.93653	0.00671515	0.0829109	Gm20515	ENSMUSG00000092242	Gm20515	ENSMUSG00000092242:Gm20515	0.370047	chr3	34434597	34435597
ENSMUSG00000042035	0.501614	3.08012	0.00957882	0.110619	Igsf3	ENSMUSG00000042035	Igsf3	ENSMUSG00000042035:Igsf3	0.384445	chr3	101376561	101377561
ENSMUSG00000041959	1.14663	2.04761	8.29181e-06	0.000219457	S100a10	ENSMUSG00000041959	S100a10	ENSMUSG00000041959:S100a10.1	0.399304	chr3	93554641	93555641
ENSMUSG00000028266	0.692988	7.6639	4.90294e-18	4.9038e-16	Lmo4	ENSMUSG00000028266	Lmo4	ENSMUSG00000028266:Lmo4.4	0.407673	chr3	144202463	144203463
ENSMUSG00000041959	1.14663	2.04761	8.29181e-06	0.000219457	S100a10	ENSMUSG00000041959	S100a10	ENSMUSG00000041959:S100a10	0.416001	chr3	93554558	93555558
ENSMUSG00000027748	4.49163	1.96906	2.45832e-37	4.82252e-35	Trpc4	ENSMUSG00000027748	Trpc4	ENSMUSG00000027748:Trpc4.2	0.422892	chr3	54156093	54157093
ENSMUSG00000002227	2.61959	4.23651	2.40055e-79	7.51537e-77	Mov10	ENSMUSG00000002227	Mov10	ENSMUSG00000002227:Mov10	0.431848	chr3	104816854	104817854
ENSMUSG00000040329	2.41262	0.0264546	4.99083e-07	1.67122e-05	Il7	ENSMUSG00000040329	Il7	ENSMUSG00000040329:Il7.2	0.461518	chr3	7613227	7614227
ENSMUSG00000040329	2.41262	0.0264546	4.99083e-07	1.67122e-05	Il7	ENSMUSG00000040329	Il7	ENSMUSG00000040329:Il7.3	0.471679	chr3	7613241	7614241
ENSMUSG00000068744	0.88805	4.91225	1.44642e-14	1.11866e-12	Psrc1	ENSMUSG00000068744	Psrc1	ENSMUSG00000068744:Psrc1.1	0.47403	chr3	108383872	108384872
ENSMUSG00000045751	0.585383	4.23215	2.18837e-05	0.000538063	Mms22l	ENSMUSG00000045751	Mms22l	ENSMUSG00000045751:Mms22l.1	0.000912637	chr4	24496022	24497022
ENSMUSG00000070908	4.086	-3.60166	0.0211224	0.207314	Gm13288	ENSMUSG00000070908	Gm13288	ENSMUSG00000070908:Gm13288	0.00334385	chr4	88805009	88806009
ENSMUSG00000028671	0.658891	3.56384	4.92306e-05	0.00113362	Gale	ENSMUSG00000028671	Gale	ENSMUSG00000028671:Gale.1	0.00361269	chr4	135963295	135964295
ENSMUSG00000028671	0.658891	3.56384	4.92306e-05	0.00113362	Gale	ENSMUSG00000028671	Gale	ENSMUSG00000028671:Gale	0.00659832	chr4	135963221	135964221
ENSMUSG00000045751	0.585383	4.23215	2.18837e-05	0.000538063	Mms22l	ENSMUSG00000045751	Mms22l	ENSMUSG00000045751:Mms22l	0.00714286	chr4	24495936	24496936
ENSMUSG00000034762	2.08397	1.71994	1.65345e-12	1.11469e-10	Glis1	ENSMUSG00000034762	Glis1	ENSMUSG00000034762:Glis1	0.00973083	chr4	107434197	107435197
ENSMUSG00000028496	0.519406	5.74638	1.97349e-08	8.1046e-07	Mllt3	ENSMUSG00000028496	Mllt3	ENSMUSG00000028496:Mllt3.4	0.0146801	chr4	88032781	88033781
ENSMUSG00000028525	0.540393	6.90289	5.94756e-10	3.08922e-08	Pde4b	ENSMUSG00000028525	Pde4b	ENSMUSG00000028525:Pde4b.3	0.0152639	chr4	102254481	102255481
ENSMUSG00000028525	0.540393	6.90289	5.94756e-10	3.08922e-08	Pde4b	ENSMUSG00000028525	Pde4b	ENSMUSG00000028525:Pde4b.4	0.0161076	chr4	102254708	102255708
ENSMUSG00000044303	0.82606	1.8281	0.00265703	0.0381791	Cdkn2a	ENSMUSG00000044303	Cdkn2a	ENSMUSG00000044303:Cdkn2a.1	0.0161625	chr4	89294153	89295153
ENSMUSG00000087366	1.63223	-0.480402	0.00094438	0.0158174	Junos	ENSMUSG00000087366	Junos	ENSMUSG00000087366:Junos.1	0.0163123	chr4	95052429	95053429
ENSMUSG00000028785	0.929463	-0.0922392	0.0361484	0.311162	Hpca	ENSMUSG00000028785	Hpca	ENSMUSG00000028785:Hpca.4	0.0166439	chr4	129121240	129122240
ENSMUSG00000028977	2.34144	-0.565886	5.46596e-06	0.000150777	Casz1	ENSMUSG00000028977	Casz1	ENSMUSG00000028977:Casz1	0.0168514	chr4	148803925	148804925
ENSMUSG00000028528	1.04399	1.68204	0.000257017	0.00502039	Dnajc6	ENSMUSG00000028528	Dnajc6	ENSMUSG00000028528:Dnajc6	0.0174804	chr4	101496117	101497117
ENSMUSG00000028778	2.3844	-1.89155	0.00107422	0.0176811	Hcrtr1	ENSMUSG00000028778	Hcrtr1	ENSMUSG00000028778:Hcrtr1.2	0.0174997	chr4	130138662	130139662
ENSMUSG00000028496	0.519406	5.74638	1.97349e-08	8.1046e-07	Mllt3	ENSMUSG00000028496	Mllt3	ENSMUSG00000028496:Mllt3.5	0.017913	chr4	88032864	88033864
ENSMUSG00000045349	0.767518	0.78185	0.0300482	0.270973	Sh2d5	ENSMUSG00000045349	Sh2d5	ENSMUSG00000045349:Sh2d5	0.0186955	chr4	138249911	138250911
ENSMUSG00000036995	1.66432	5.40297	2.40887e-37	4.74589e-35	Asap3	ENSMUSG00000036995	Asap3	ENSMUSG00000036995:Asap3	0.0238474	chr4	136205843	136206843
ENSMUSG00000040183	0.714433	4.50718	9.86766e-10	5.01703e-08	Ankrd6	ENSMUSG00000040183	Ankrd6	ENSMUSG00000040183:Ankrd6.5	0.0239288	chr4	32950326	32951326
ENSMUSG00000040183	0.714433	4.50718	9.86766e-10	5.01703e-08	Ankrd6	ENSMUSG00000040183	Ankrd6	ENSMUSG00000040183:Ankrd6.6	0.0247683	chr4	32950341	32951341
ENSMUSG00000028718	0.631118	4.82776	1.48954e-08	6.25773e-07	Stil	ENSMUSG00000028718	Stil	ENSMUSG00000028718:Stil	0.0284718	chr4	114999648	115000648
ENSMUSG00000028312	0.519353	6.78458	8.0029e-09	3.54111e-07	Smc2	ENSMUSG00000028312	Smc2	ENSMUSG00000028312:Smc2	0.0316452	chr4	52438734	52439734
ENSMUSG00000028789	2.52245	4.42693	3.74209e-80	1.1878e-77	Azin2	ENSMUSG00000028789	Azin2	ENSMUSG00000028789:Azin2.2	0.0319993	chr4	128961941	128962941
ENSMUSG00000028792	1.08128	6.37044	1.78555e-35	3.38646e-33	Ak2	ENSMUSG00000028792	Ak2	ENSMUSG00000028792:Ak2.2	0.0324799	chr4	128992831	128993831
ENSMUSG00000086782	1.39258	0.326025	0.00079445	0.0136105	E130102H24Rik	ENSMUSG00000086782	E130102H24Rik	ENSMUSG00000086782:E130102H24Rik.1	0.032722	chr4	101356235	101357235
ENSMUSG00000028789	2.52245	4.42693	3.74209e-80	1.1878e-77	Azin2	ENSMUSG00000028789	Azin2	ENSMUSG00000028789:Azin2.1	0.0342558	chr4	128961924	128962924
ENSMUSG00000028792	1.08128	6.37044	1.78555e-35	3.38646e-33	Ak2	ENSMUSG00000028792	Ak2	ENSMUSG00000028792:Ak2.1	0.0343278	chr4	128992702	128993702
ENSMUSG00000086782	1.39258	0.326025	0.00079445	0.0136105	E130102H24Rik	ENSMUSG00000086782	E130102H24Rik	ENSMUSG00000086782:E130102H24Rik	0.0369656	chr4	101355748	101356748
ENSMUSG00000028496	0.519406	5.74638	1.97349e-08	8.1046e-07	Mllt3	ENSMUSG00000028496	Mllt3	ENSMUSG00000028496:Mllt3.3	0.0375093	chr4	88032313	88033313
ENSMUSG00000028525	0.540393	6.90289	5.94756e-10	3.08922e-08	Pde4b	ENSMUSG00000028525	Pde4b	ENSMUSG00000028525:Pde4b.2	0.0379731	chr4	102254220	102255220
ENSMUSG00000028670	0.881666	6.39205	1.72297e-20	2.00901e-18	Lypla2	ENSMUSG00000028670	Lypla2	ENSMUSG00000028670:Lypla2.2	0.039199	chr4	135972088	135973088
ENSMUSG00000038007	2.73844	0.00970256	8.08599e-09	3.57442e-07	Acer2	ENSMUSG00000038007	Acer2	ENSMUSG00000038007:Acer2	0.0411399	chr4	86873883	86874883
ENSMUSG00000028794	1.0049	0.0772019	0.0179706	0.183471	A3galt2	ENSMUSG00000028794	A3galt2	ENSMUSG00000028794:A3galt2	0.0453717	chr4	128754842	128755842
ENSMUSG00000028525	0.540393	6.90289	5.94756e-10	3.08922e-08	Pde4b	ENSMUSG00000028525	Pde4b	ENSMUSG00000028525:Pde4b	0.0461366	chr4	102087021	102088021
ENSMUSG00000028525	0.540393	6.90289	5.94756e-10	3.08922e-08	Pde4b	ENSMUSG00000028525	Pde4b	ENSMUSG00000028525:Pde4b.11	0.048139	chr4	102589321	102590321
ENSMUSG00000040690	1.5737	6.43794	9.56596e-30	1.64997e-27	Col16a1	ENSMUSG00000040690	Col16a1	ENSMUSG00000040690:Col16a1.1	0.0518848	chr4	130054510	130055510
ENSMUSG00000028670	0.881666	6.39205	1.72297e-20	2.00901e-18	Lypla2	ENSMUSG00000028670	Lypla2	ENSMUSG00000028670:Lypla2.4	0.05282	chr4	135972126	135973126
ENSMUSG00000028670	0.881666	6.39205	1.72297e-20	2.00901e-18	Lypla2	ENSMUSG00000028670	Lypla2	ENSMUSG00000028670:Lypla2.3	0.0538276	chr4	135972103	135973103
ENSMUSG00000028525	0.540393	6.90289	5.94756e-10	3.08922e-08	Pde4b	ENSMUSG00000028525	Pde4b	ENSMUSG00000028525:Pde4b.10	0.0582377	chr4	102589201	102590201
ENSMUSG00000049488	0.690855	3.17297	0.000135984	0.0028304	Tmem67	ENSMUSG00000049488	Tmem67	ENSMUSG00000049488:Tmem67	0.0584799	chr4	12087433	12088433
ENSMUSG00000049488	0.690855	3.17297	0.000135984	0.0028304	Tmem67	ENSMUSG00000049488	Tmem67	ENSMUSG00000049488:Tmem67.1	0.0607394	chr4	12087457	12088457
ENSMUSG00000049488	0.690855	3.17297	0.000135984	0.0028304	Tmem67	ENSMUSG00000049488	Tmem67	ENSMUSG00000049488:Tmem67.2	0.0611801	chr4	12087507	12088507
ENSMUSG00000028706	0.912324	3.79767	1.52563e-09	7.49699e-08	Nsun4	ENSMUSG00000028706	Nsun4	ENSMUSG00000028706:Nsun4.5	0.063536	chr4	116053376	116054376
ENSMUSG00000040690	1.5737	6.43794	9.56596e-30	1.64997e-27	Col16a1	ENSMUSG00000040690	Col16a1	ENSMUSG00000040690:Col16a1.4	0.0637464	chr4	130076521	130077521
ENSMUSG00000028438	0.71658	3.4708	2.86299e-05	0.000689834	Kif24	ENSMUSG00000028438	Kif24	ENSMUSG00000028438:Kif24.3	0.0661077	chr4	41464387	41465387
ENSMUSG00000035561	1.27275	2.39691	2.58565e-06	7.57595e-05	Aldh1b1	ENSMUSG00000035561	Aldh1b1	ENSMUSG00000035561:Aldh1b1.1	0.066454	chr4	45798599	45799599
ENSMUSG00000028873	0.533142	5.61058	1.89149e-08	7.80997e-07	Cdca8	ENSMUSG00000028873	Cdca8	ENSMUSG00000028873:Cdca8	0.0671642	chr4	124935907	124936907
ENSMUSG00000037622	1.53446	7.14194	7.65998e-73	2.28838e-70	Wdtc1	ENSMUSG00000037622	Wdtc1	ENSMUSG00000037622:Wdtc1.2	0.0676552	chr4	133338824	133339824
ENSMUSG00000037622	1.53446	7.14194	7.65998e-73	2.28838e-70	Wdtc1	ENSMUSG00000037622	Wdtc1	ENSMUSG00000037622:Wdtc1.1	0.0683885	chr4	133338771	133339771
ENSMUSG00000028438	0.71658	3.4708	2.86299e-05	0.000689834	Kif24	ENSMUSG00000028438	Kif24	ENSMUSG00000028438:Kif24.2	0.0690996	chr4	41464344	41465344
ENSMUSG00000040616	1.67653	3.62035	5.49652e-22	6.94019e-20	Tmem51	ENSMUSG00000040616	Tmem51	ENSMUSG00000040616:Tmem51	0.0703666	chr4	142083804	142084804
ENSMUSG00000028670	0.881666	6.39205	1.72297e-20	2.00901e-18	Lypla2	ENSMUSG00000028670	Lypla2	ENSMUSG00000028670:Lypla2.1	0.072718	chr4	135971429	135972429
ENSMUSG00000028778	2.3844	-1.89155	0.00107422	0.0176811	Hcrtr1	ENSMUSG00000028778	Hcrtr1	ENSMUSG00000028778:Hcrtr1.3	0.0729445	chr4	130138859	130139859
ENSMUSG00000035561	1.27275	2.39691	2.58565e-06	7.57595e-05	Aldh1b1	ENSMUSG00000035561	Aldh1b1	ENSMUSG00000035561:Aldh1b1	0.0751583	chr4	45798500	45799500
ENSMUSG00000028807	0.740519	1.9766	0.00419833	0.0562418	Zbtb8a	ENSMUSG00000028807	Zbtb8a	ENSMUSG00000028807:Zbtb8a	0.0760678	chr4	129377616	129378616
ENSMUSG00000028525	0.540393	6.90289	5.94756e-10	3.08922e-08	Pde4b	ENSMUSG00000028525	Pde4b	ENSMUSG00000028525:Pde4b.1	0.0762371	chr4	102087211	102088211
ENSMUSG00000037295	1.76522	1.27972	4.69523e-06	0.00013126	Ldlrap1	ENSMUSG00000037295	Ldlrap1	ENSMUSG00000037295:Ldlrap1.2	0.0770537	chr4	134767524	134768524
ENSMUSG00000029022	0.528124	3.88035	0.000482117	0.00877253	Miip	ENSMUSG00000029022	Miip	ENSMUSG00000029022:Miip.7	0.0771618	chr4	147868316	147869316
ENSMUSG00000029022	0.528124	3.88035	0.000482117	0.00877253	Miip	ENSMUSG00000029022	Miip	ENSMUSG00000029022:Miip.6	0.0776992	chr4	147868219	147869219
ENSMUSG00000028706	0.912324	3.79767	1.52563e-09	7.49699e-08	Nsun4	ENSMUSG00000028706	Nsun4	ENSMUSG00000028706:Nsun4.4	0.0798139	chr4	116052880	116053880
ENSMUSG00000029022	0.528124	3.88035	0.000482117	0.00877253	Miip	ENSMUSG00000029022	Miip	ENSMUSG00000029022:Miip.5	0.0805393	chr4	147868166	147869166
ENSMUSG00000087366	1.63223	-0.480402	0.00094438	0.0158174	Junos	ENSMUSG00000087366	Junos	ENSMUSG00000087366:Junos.2	0.0810302	chr4	95052718	95053718
ENSMUSG00000028965	2.65687	-3.27796	0.0385664	0.32256	Tnfrsf9	ENSMUSG00000028965	Tnfrsf9	ENSMUSG00000028965:Tnfrsf9	0.0818008	chr4	150914040	150915040
ENSMUSG00000052684	1.23389	7.46734	9.93306e-53	2.49462e-50	Jun	ENSMUSG00000052684	Jun	ENSMUSG00000052684:Jun	0.0912623	chr4	95051722	95052722
ENSMUSG00000029022	0.528124	3.88035	0.000482117	0.00877253	Miip	ENSMUSG00000029022	Miip	ENSMUSG00000029022:Miip.4	0.0919955	chr4	147868023	147869023
ENSMUSG00000028702	0.80894	4.6918	3.18903e-13	2.30275e-11	Rad54l	ENSMUSG00000028702	Rad54l	ENSMUSG00000028702:Rad54l.3	0.0931776	chr4	116123159	116124159
ENSMUSG00000028702	0.80894	4.6918	3.18903e-13	2.30275e-11	Rad54l	ENSMUSG00000028702	Rad54l	ENSMUSG00000028702:Rad54l.4	0.0939401	chr4	116123188	116124188
ENSMUSG00000039298	0.641442	7.63679	5.26911e-15	4.2105e-13	Cdk5rap2	ENSMUSG00000039298	Cdk5rap2	ENSMUSG00000039298:Cdk5rap2.5	0.0942675	chr4	70409943	70410943
ENSMUSG00000029022	0.528124	3.88035	0.000482117	0.00877253	Miip	ENSMUSG00000029022	Miip	ENSMUSG00000029022:Miip.3	0.0944487	chr4	147867999	147868999
ENSMUSG00000039298	0.641442	7.63679	5.26911e-15	4.2105e-13	Cdk5rap2	ENSMUSG00000039298	Cdk5rap2	ENSMUSG00000039298:Cdk5rap2.4	0.0949653	chr4	70409918	70410918
ENSMUSG00000029022	0.528124	3.88035	0.000482117	0.00877253	Miip	ENSMUSG00000029022	Miip	ENSMUSG00000029022:Miip.2	0.0959281	chr4	147867983	147868983
ENSMUSG00000008489	0.746949	4.49339	3.49461e-10	1.85951e-08	Elavl2	ENSMUSG00000008489	Elavl2	ENSMUSG00000008489:Elavl2.10	0.0976876	chr4	91375963	91376963
ENSMUSG00000008489	0.746949	4.49339	3.49461e-10	1.85951e-08	Elavl2	ENSMUSG00000008489	Elavl2	ENSMUSG00000008489:Elavl2.11	0.0980296	chr4	91375996	91376996
ENSMUSG00000008489	0.746949	4.49339	3.49461e-10	1.85951e-08	Elavl2	ENSMUSG00000008489	Elavl2	ENSMUSG00000008489:Elavl2.9	0.0985983	chr4	91375934	91376934
ENSMUSG00000008489	0.746949	4.49339	3.49461e-10	1.85951e-08	Elavl2	ENSMUSG00000008489	Elavl2	ENSMUSG00000008489:Elavl2.8	0.100522	chr4	91375807	91376807
ENSMUSG00000040183	0.714433	4.50718	9.86766e-10	5.01703e-08	Ankrd6	ENSMUSG00000040183	Ankrd6	ENSMUSG00000040183:Ankrd6.3	0.100609	chr4	32922955	32923955
ENSMUSG00000035551	2.5567	1.02557	5.32102e-10	2.78914e-08	Igfbpl1	ENSMUSG00000035551	Igfbpl1	ENSMUSG00000035551:Igfbpl1.1	0.1063	chr4	45826423	45827423
ENSMUSG00000040183	0.714433	4.50718	9.86766e-10	5.01703e-08	Ankrd6	ENSMUSG00000040183	Ankrd6	ENSMUSG00000040183:Ankrd6.4	0.114501	chr4	32923005	32924005
ENSMUSG00000049657	0.756209	5.58214	1.31429e-15	1.11248e-13	Zbtb5	ENSMUSG00000049657	Zbtb5	ENSMUSG00000049657:Zbtb5	0.116273	chr4	45011645	45012645
ENSMUSG00000028796	0.542609	7.18505	2.21932e-11	1.35979e-09	Phc2	ENSMUSG00000028796	Phc2	ENSMUSG00000028796:Phc2	0.116427	chr4	128654198	128655198
ENSMUSG00000041135	1.39454	3.32253	9.74857e-13	6.69051e-11	Ripk2	ENSMUSG00000041135	Ripk2	ENSMUSG00000041135:Ripk2	0.120195	chr4	16163145	16164145
ENSMUSG00000040569	2.79819	0.495741	3.73106e-11	2.24394e-09	Slc26a7	ENSMUSG00000040569	Slc26a7	ENSMUSG00000040569:Slc26a7.2	0.120298	chr4	14621169	14622169
ENSMUSG00000008489	0.746949	4.49339	3.49461e-10	1.85951e-08	Elavl2	ENSMUSG00000008489	Elavl2	ENSMUSG00000008489:Elavl2.12	0.121618	chr4	91399480	91400480
ENSMUSG00000028530	0.501345	6.8074	1.0801e-09	5.43713e-08	Jak1	ENSMUSG00000028530	Jak1	ENSMUSG00000028530:Jak1.3	0.125068	chr4	101264725	101265725
ENSMUSG00000028778	2.3844	-1.89155	0.00107422	0.0176811	Hcrtr1	ENSMUSG00000028778	Hcrtr1	ENSMUSG00000028778:Hcrtr1.1	0.128026	chr4	130138051	130139051
ENSMUSG00000028530	0.501345	6.8074	1.0801e-09	5.43713e-08	Jak1	ENSMUSG00000028530	Jak1	ENSMUSG00000028530:Jak1.4	0.129845	chr4	101264778	101265778
ENSMUSG00000028884	0.509657	4.2192	9.89913e-05	0.00212627	Rpa2	ENSMUSG00000028884	Rpa2	ENSMUSG00000028884:Rpa2.1	0.130573	chr4	132768113	132769113
ENSMUSG00000028793	2.95001	6.97814	7.04847e-235	4.29562e-232	Rnf19b	ENSMUSG00000028793	Rnf19b	ENSMUSG00000028793:Rnf19b.2	0.131925	chr4	129058292	129059292
ENSMUSG00000028884	0.509657	4.2192	9.89913e-05	0.00212627	Rpa2	ENSMUSG00000028884	Rpa2	ENSMUSG00000028884:Rpa2	0.133725	chr4	132767832	132768832
ENSMUSG00000040569	2.79819	0.495741	3.73106e-11	2.24394e-09	Slc26a7	ENSMUSG00000040569	Slc26a7	ENSMUSG00000040569:Slc26a7.3	0.136883	chr4	14621305	14622305
ENSMUSG00000040569	2.79819	0.495741	3.73106e-11	2.24394e-09	Slc26a7	ENSMUSG00000040569	Slc26a7	ENSMUSG00000040569:Slc26a7.1	0.136898	chr4	14620997	14621997
ENSMUSG00000028785	0.929463	-0.0922392	0.0361484	0.311162	Hpca	ENSMUSG00000028785	Hpca	ENSMUSG00000028785:Hpca.3	0.138009	chr4	129121208	129122208
ENSMUSG00000028837	0.822324	6.45515	1.69263e-20	1.97869e-18	Psmb2	ENSMUSG00000028837	Psmb2	ENSMUSG00000028837:Psmb2	0.142015	chr4	126677145	126678145
ENSMUSG00000042489	0.802144	5.16894	3.49147e-15	2.84471e-13	Clspn	ENSMUSG00000042489	Clspn	ENSMUSG00000042489:Clspn.1	0.146262	chr4	126556478	126557478
ENSMUSG00000028337	1.20934	-0.369198	0.00904532	0.105957	Coro2a	ENSMUSG00000028337	Coro2a	ENSMUSG00000028337:Coro2a.4	0.147277	chr4	46601393	46602393
ENSMUSG00000000409	3.00269	-0.603278	4.39099e-08	1.73169e-06	Lck	ENSMUSG00000000409	Lck	ENSMUSG00000000409:Lck	0.147939	chr4	129555348	129556348
ENSMUSG00000028796	0.542609	7.18505	2.21932e-11	1.35979e-09	Phc2	ENSMUSG00000028796	Phc2	ENSMUSG00000028796:Phc2.4	0.149279	chr4	128727061	128728061
ENSMUSG00000085870	3.79475	-3.6017	0.0367861	0.314003	Gm12829	ENSMUSG00000085870	Gm12829	ENSMUSG00000085870:Gm12829	0.149899	chr4	114680282	114681282
ENSMUSG00000028785	0.929463	-0.0922392	0.0361484	0.311162	Hpca	ENSMUSG00000028785	Hpca	ENSMUSG00000028785:Hpca.2	0.152021	chr4	129120791	129121791
ENSMUSG00000042489	0.802144	5.16894	3.49147e-15	2.84471e-13	Clspn	ENSMUSG00000042489	Clspn	ENSMUSG00000042489:Clspn	0.152297	chr4	126556413	126557413
ENSMUSG00000049488	0.690855	3.17297	0.000135984	0.0028304	Tmem67	ENSMUSG00000049488	Tmem67	ENSMUSG00000049488:Tmem67.3	0.154818	chr4	12089520	12090520
ENSMUSG00000028337	1.20934	-0.369198	0.00904532	0.105957	Coro2a	ENSMUSG00000028337	Coro2a	ENSMUSG00000028337:Coro2a.5	0.155571	chr4	46601702	46602702
ENSMUSG00000028785	0.929463	-0.0922392	0.0361484	0.311162	Hpca	ENSMUSG00000028785	Hpca	ENSMUSG00000028785:Hpca.1	0.155696	chr4	129120446	129121446
ENSMUSG00000040690	1.5737	6.43794	9.56596e-30	1.64997e-27	Col16a1	ENSMUSG00000040690	Col16a1	ENSMUSG00000040690:Col16a1	0.157588	chr4	130047379	130048379
ENSMUSG00000028438	0.71658	3.4708	2.86299e-05	0.000689834	Kif24	ENSMUSG00000028438	Kif24	ENSMUSG00000028438:Kif24	0.158542	chr4	41404286	41405286
ENSMUSG00000045573	1.33033	-1.08176	0.0310722	0.278099	Penk	ENSMUSG00000045573	Penk	ENSMUSG00000045573:Penk.1	0.159308	chr4	4138319	4139319
ENSMUSG00000028796	0.542609	7.18505	2.21932e-11	1.35979e-09	Phc2	ENSMUSG00000028796	Phc2	ENSMUSG00000028796:Phc2.5	0.160911	chr4	128727174	128728174
ENSMUSG00000078773	0.614794	3.52411	0.000208098	0.00415179	Rad54b	ENSMUSG00000078773	Rad54b	ENSMUSG00000078773:Rad54b	0.161503	chr4	11558425	11559425
ENSMUSG00000028796	0.542609	7.18505	2.21932e-11	1.35979e-09	Phc2	ENSMUSG00000028796	Phc2	ENSMUSG00000028796:Phc2.6	0.166074	chr4	128727435	128728435
ENSMUSG00000028873	0.533142	5.61058	1.89149e-08	7.80997e-07	Cdca8	ENSMUSG00000028873	Cdca8	ENSMUSG00000028873:Cdca8.3	0.166271	chr4	124936373	124937373
ENSMUSG00000028873	0.533142	5.61058	1.89149e-08	7.80997e-07	Cdca8	ENSMUSG00000028873	Cdca8	ENSMUSG00000028873:Cdca8.1	0.167218	chr4	124936281	124937281
ENSMUSG00000040536	1.57192	0.551152	6.39068e-05	0.00143049	Necab1	ENSMUSG00000040536	Necab1	ENSMUSG00000040536:Necab1	0.168402	chr4	15148461	15149461
ENSMUSG00000028873	0.533142	5.61058	1.89149e-08	7.80997e-07	Cdca8	ENSMUSG00000028873	Cdca8	ENSMUSG00000028873:Cdca8.2	0.168734	chr4	124936342	124937342
ENSMUSG00000028873	0.533142	5.61058	1.89149e-08	7.80997e-07	Cdca8	ENSMUSG00000028873	Cdca8	ENSMUSG00000028873:Cdca8.4	0.169394	chr4	124936417	124937417
ENSMUSG00000040183	0.714433	4.50718	9.86766e-10	5.01703e-08	Ankrd6	ENSMUSG00000040183	Ankrd6	ENSMUSG00000040183:Ankrd6.2	0.171077	chr4	32860183	32861183
ENSMUSG00000028494	1.22107	3.17846	3.27202e-11	1.97827e-09	Plin2	ENSMUSG00000028494	Plin2	ENSMUSG00000028494:Plin2.6	0.174583	chr4	86669486	86670486
ENSMUSG00000049657	0.756209	5.58214	1.31429e-15	1.11248e-13	Zbtb5	ENSMUSG00000049657	Zbtb5	ENSMUSG00000049657:Zbtb5.2	0.175021	chr4	45011912	45012912
ENSMUSG00000049657	0.756209	5.58214	1.31429e-15	1.11248e-13	Zbtb5	ENSMUSG00000049657	Zbtb5	ENSMUSG00000049657:Zbtb5.1	0.175375	chr4	45011894	45012894
ENSMUSG00000090053	0.841053	1.38983	0.00680932	0.0838245	Pakap	ENSMUSG00000090053	Palm2	ENSMUSG00000090053:Pakap	0.180442	chr4	57433725	57434725
ENSMUSG00000028494	1.22107	3.17846	3.27202e-11	1.97827e-09	Plin2	ENSMUSG00000028494	Plin2	ENSMUSG00000028494:Plin2.7	0.182216	chr4	86669560	86670560
ENSMUSG00000040183	0.714433	4.50718	9.86766e-10	5.01703e-08	Ankrd6	ENSMUSG00000040183	Ankrd6	ENSMUSG00000040183:Ankrd6.1	0.182426	chr4	32859942	32860942
ENSMUSG00000008489	0.746949	4.49339	3.49461e-10	1.85951e-08	Elavl2	ENSMUSG00000008489	Elavl2	ENSMUSG00000008489:Elavl2.6	0.189225	chr4	91371569	91372569
ENSMUSG00000008489	0.746949	4.49339	3.49461e-10	1.85951e-08	Elavl2	ENSMUSG00000008489	Elavl2	ENSMUSG00000008489:Elavl2.5	0.191153	chr4	91371554	91372554
ENSMUSG00000008489	0.746949	4.49339	3.49461e-10	1.85951e-08	Elavl2	ENSMUSG00000008489	Elavl2	ENSMUSG00000008489:Elavl2.3	0.193454	chr4	91371456	91372456
ENSMUSG00000008489	0.746949	4.49339	3.49461e-10	1.85951e-08	Elavl2	ENSMUSG00000008489	Elavl2	ENSMUSG00000008489:Elavl2.4	0.195414	chr4	91371534	91372534
ENSMUSG00000040536	1.57192	0.551152	6.39068e-05	0.00143049	Necab1	ENSMUSG00000040536	Necab1	ENSMUSG00000040536:Necab1.1	0.195801	chr4	15148631	15149631
ENSMUSG00000028678	0.641793	5.51084	1.05891e-09	5.35407e-08	Kif2c	ENSMUSG00000028678	Kif2c	ENSMUSG00000028678:Kif2c.3	0.196658	chr4	117182042	117183042
ENSMUSG00000028793	2.95001	6.97814	7.04847e-235	4.29562e-232	Rnf19b	ENSMUSG00000028793	Rnf19b	ENSMUSG00000028793:Rnf19b.1	0.201304	chr4	129057887	129058887
ENSMUSG00000028678	0.641793	5.51084	1.05891e-09	5.35407e-08	Kif2c	ENSMUSG00000028678	Kif2c	ENSMUSG00000028678:Kif2c.6	0.201743	chr4	117182139	117183139
ENSMUSG00000028678	0.641793	5.51084	1.05891e-09	5.35407e-08	Kif2c	ENSMUSG00000028678	Kif2c	ENSMUSG00000028678:Kif2c.4	0.203123	chr4	117182092	117183092
ENSMUSG00000028793	2.95001	6.97814	7.04847e-235	4.29562e-232	Rnf19b	ENSMUSG00000028793	Rnf19b	ENSMUSG00000028793:Rnf19b	0.203297	chr4	129057749	129058749
ENSMUSG00000028678	0.641793	5.51084	1.05891e-09	5.35407e-08	Kif2c	ENSMUSG00000028678	Kif2c	ENSMUSG00000028678:Kif2c.5	0.203961	chr4	117182106	117183106
ENSMUSG00000028546	0.615238	5.84709	3.01654e-10	1.61263e-08	Elavl4	ENSMUSG00000028546	Elavl4	ENSMUSG00000028546:Elavl4.6	0.204143	chr4	110290393	110291393
ENSMUSG00000028525	0.540393	6.90289	5.94756e-10	3.08922e-08	Pde4b	ENSMUSG00000028525	Pde4b	ENSMUSG00000028525:Pde4b.5	0.204589	chr4	102420996	102421996
ENSMUSG00000028546	0.615238	5.84709	3.01654e-10	1.61263e-08	Elavl4	ENSMUSG00000028546	Elavl4	ENSMUSG00000028546:Elavl4.8	0.206743	chr4	110351409	110352409
ENSMUSG00000037188	1.32103	-1.59747	0.0339849	0.297412	Grhl3	ENSMUSG00000037188	Grhl3	ENSMUSG00000037188:Grhl3	0.214291	chr4	135573130	135574130
ENSMUSG00000045573	1.33033	-1.08176	0.0310722	0.278099	Penk	ENSMUSG00000045573	Penk	ENSMUSG00000045573:Penk	0.215085	chr4	4137977	4138977
ENSMUSG00000040690	1.5737	6.43794	9.56596e-30	1.64997e-27	Col16a1	ENSMUSG00000040690	Col16a1	ENSMUSG00000040690:Col16a1.5	0.218276	chr4	130078488	130079488
ENSMUSG00000028494	1.22107	3.17846	3.27202e-11	1.97827e-09	Plin2	ENSMUSG00000028494	Plin2	ENSMUSG00000028494:Plin2.5	0.223012	chr4	86669268	86670268
ENSMUSG00000042116	1.23751	3.81147	9.69602e-16	8.29936e-14	Vwa1	ENSMUSG00000042116	Vwa1	ENSMUSG00000042116:Vwa1	0.225004	chr4	155774198	155775198
ENSMUSG00000018983	0.536308	3.80874	0.000357634	0.00674091	E2f2	ENSMUSG00000018983	E2f2	ENSMUSG00000018983:E2f2	0.242592	chr4	136171872	136172872
ENSMUSG00000083904	4.33507	-3.48568	0.0122717	0.135082	Gm12805	ENSMUSG00000083904	Gm12805	ENSMUSG00000083904:Gm12805	0.247775	chr4	111320105	111321105
ENSMUSG00000028546	0.615238	5.84709	3.01654e-10	1.61263e-08	Elavl4	ENSMUSG00000028546	Elavl4	ENSMUSG00000028546:Elavl4.2	0.248594	chr4	110286116	110287116
ENSMUSG00000028709	1.21058	3.10094	2.89168e-10	1.54992e-08	Mob3c	ENSMUSG00000028709	Mob3c	ENSMUSG00000028709:Mob3c.1	0.249662	chr4	115828136	115829136
ENSMUSG00000028494	1.22107	3.17846	3.27202e-11	1.97827e-09	Plin2	ENSMUSG00000028494	Plin2	ENSMUSG00000028494:Plin2.4	0.251503	chr4	86669060	86670060
ENSMUSG00000069733	4.02822	-3.72767	0.0275058	0.253611	Ube2u	ENSMUSG00000069733	Ube2u	ENSMUSG00000069733:Ube2u	0.254897	chr4	100478336	100479336
ENSMUSG00000044303	0.82606	1.8281	0.00265703	0.0381791	Cdkn2a	ENSMUSG00000044303	Cdkn2a	ENSMUSG00000044303:Cdkn2a	0.260715	chr4	89281692	89282692
ENSMUSG00000040690	1.5737	6.43794	9.56596e-30	1.64997e-27	Col16a1	ENSMUSG00000040690	Col16a1	ENSMUSG00000040690:Col16a1.2	0.265796	chr4	130055468	130056468
ENSMUSG00000028525	0.540393	6.90289	5.94756e-10	3.08922e-08	Pde4b	ENSMUSG00000028525	Pde4b	ENSMUSG00000028525:Pde4b.8	0.271005	chr4	102569573	102570573
ENSMUSG00000087366	1.63223	-0.480402	0.00094438	0.0158174	Junos	ENSMUSG00000087366	Junos	ENSMUSG00000087366:Junos	0.27148	chr4	95051012	95052012
ENSMUSG00000090053	0.841053	1.38983	0.00680932	0.0838245	Pakap	ENSMUSG00000090053	Palm2	ENSMUSG00000090053:Pakap.3	0.28426	chr4	57637453	57638453
ENSMUSG00000018983	0.536308	3.80874	0.000357634	0.00674091	E2f2	ENSMUSG00000018983	E2f2	ENSMUSG00000018983:E2f2.1	0.286263	chr4	136180261	136181261
ENSMUSG00000090053	0.841053	1.38983	0.00680932	0.0838245	Pakap	ENSMUSG00000090053	Palm2	ENSMUSG00000090053:Pakap.1	0.287253	chr4	57567647	57568647
ENSMUSG00000028525	0.540393	6.90289	5.94756e-10	3.08922e-08	Pde4b	ENSMUSG00000028525	Pde4b	ENSMUSG00000028525:Pde4b.9	0.289139	chr4	102587036	102588036
ENSMUSG00000028885	0.586071	2.73393	0.013375	0.145178	Smpdl3b	ENSMUSG00000028885	Smpdl3b	ENSMUSG00000028885:Smpdl3b	0.299827	chr4	132756752	132757752
ENSMUSG00000090053	0.841053	1.38983	0.00680932	0.0838245	Pakap	ENSMUSG00000090053	Palm2	ENSMUSG00000090053:Pakap.2	0.310044	chr4	57567803	57568803
ENSMUSG00000028546	0.615238	5.84709	3.01654e-10	1.61263e-08	Elavl4	ENSMUSG00000028546	Elavl4	ENSMUSG00000028546:Elavl4.3	0.310487	chr4	110286389	110287389
ENSMUSG00000066152	0.514469	2.50139	0.0216332	0.21151	Slc31a2	ENSMUSG00000066152	Slc31a2	ENSMUSG00000066152:Slc31a2.1	0.320848	chr4	62285927	62286927
ENSMUSG00000050234	3.20408	-0.416055	5.55512e-08	2.17206e-06	Gja4	ENSMUSG00000050234	Gja4	ENSMUSG00000050234:Gja4	0.332318	chr4	127313539	127314539
ENSMUSG00000086417	3.79475	-3.6017	0.0367861	0.314003	Gm12996	ENSMUSG00000086417	Gm12996	ENSMUSG00000086417:Gm12996	0.339389	chr4	116824381	116825381
ENSMUSG00000087366	1.63223	-0.480402	0.00094438	0.0158174	Junos	ENSMUSG00000087366	Junos	ENSMUSG00000087366:Junos.5	0.339674	chr4	95092988	95093988
ENSMUSG00000028789	2.52245	4.42693	3.74209e-80	1.1878e-77	Azin2	ENSMUSG00000028789	Azin2	ENSMUSG00000028789:Azin2	0.340796	chr4	128960898	128961898
ENSMUSG00000035683	0.684829	4.83001	1.06879e-09	5.39209e-08	Melk	ENSMUSG00000035683	Melk	ENSMUSG00000035683:Melk	0.362589	chr4	44300354	44301354
ENSMUSG00000078521	0.818446	1.41633	0.00872436	0.102697	Aunip	ENSMUSG00000078521	Aunip	ENSMUSG00000078521:Aunip	0.381459	chr4	134510477	134511477
ENSMUSG00000085562	2.577	-2.54051	0.00903345	0.105845	2610028E06Rik	ENSMUSG00000085562	2610028E06Rik	ENSMUSG00000085562:2610028E06Rik.2	0.392186	chr4	125921810	125922810
ENSMUSG00000028546	0.615238	5.84709	3.01654e-10	1.61263e-08	Elavl4	ENSMUSG00000028546	Elavl4	ENSMUSG00000028546:Elavl4.7	0.395178	chr4	110292222	110293222
ENSMUSG00000028480	1.68557	3.51099	2.00866e-21	2.44831e-19	Glipr2	ENSMUSG00000028480	Glipr2	ENSMUSG00000028480:Glipr2	0.400875	chr4	43956879	43957879
ENSMUSG00000000409	3.00269	-0.603278	4.39099e-08	1.73169e-06	Lck	ENSMUSG00000000409	Lck	ENSMUSG00000000409:Lck.1	0.408352	chr4	129555731	129556731
ENSMUSG00000028528	1.04399	1.68204	0.000257017	0.00502039	Dnajc6	ENSMUSG00000028528	Dnajc6	ENSMUSG00000028528:Dnajc6.4	0.411886	chr4	101550072	101551072
ENSMUSG00000028709	1.21058	3.10094	2.89168e-10	1.54992e-08	Mob3c	ENSMUSG00000028709	Mob3c	ENSMUSG00000028709:Mob3c	0.418369	chr4	115827572	115828572
ENSMUSG00000028480	1.68557	3.51099	2.00866e-21	2.44831e-19	Glipr2	ENSMUSG00000028480	Glipr2	ENSMUSG00000028480:Glipr2.1	0.421196	chr4	43957170	43958170
ENSMUSG00000000409	3.00269	-0.603278	4.39099e-08	1.73169e-06	Lck	ENSMUSG00000000409	Lck	ENSMUSG00000000409:Lck.2	0.424575	chr4	129555959	129556959
ENSMUSG00000028528	1.04399	1.68204	0.000257017	0.00502039	Dnajc6	ENSMUSG00000028528	Dnajc6	ENSMUSG00000028528:Dnajc6.3	0.425035	chr4	101549958	101550958
ENSMUSG00000087381	1.47712	1.56796	9.62681e-07	3.07708e-05	Gm16008	ENSMUSG00000087381	Gm16008	ENSMUSG00000087381:Gm16008.1	0.446177	chr4	156031122	156032122
ENSMUSG00000087381	1.47712	1.56796	9.62681e-07	3.07708e-05	Gm16008	ENSMUSG00000087381	Gm16008	ENSMUSG00000087381:Gm16008.2	0.451228	chr4	156031143	156032143
ENSMUSG00000085562	2.577	-2.54051	0.00903345	0.105845	2610028E06Rik	ENSMUSG00000085562	2610028E06Rik	ENSMUSG00000085562:2610028E06Rik.3	0.474039	chr4	125921917	125922917
ENSMUSG00000033615	1.11399	4.66864	6.04416e-21	7.15716e-19	Cplx1	ENSMUSG00000033615	Cplx1	ENSMUSG00000033615:Cplx1	0.00577157	chr5	108549500	108550500
ENSMUSG00000015880	0.636851	5.58329	6.41575e-09	2.88633e-07	Ncapg	ENSMUSG00000015880	Ncapg	ENSMUSG00000015880:Ncapg	0.00621318	chr5	45669397	45670397
ENSMUSG00000033294	1.42993	5.10981	1.00281e-43	2.22508e-41	Noc4l	ENSMUSG00000033294	Noc4l	ENSMUSG00000033294:Noc4l.4	0.00885588	chr5	110652880	110653880
ENSMUSG00000033294	1.42993	5.10981	1.00281e-43	2.22508e-41	Noc4l	ENSMUSG00000033294	Noc4l	ENSMUSG00000033294:Noc4l.3	0.00893563	chr5	110652866	110653866
ENSMUSG00000004846	0.566515	5.98002	2.95557e-10	1.58189e-08	Plod3	ENSMUSG00000004846	Plod3	ENSMUSG00000004846:Plod3.1	0.00950792	chr5	136986856	136987856
ENSMUSG00000059325	0.809326	3.93797	4.23535e-08	1.67901e-06	Hopx	ENSMUSG00000059325	Hopx	ENSMUSG00000059325:Hopx.2	0.010496	chr5	77114621	77115621
ENSMUSG00000033294	1.42993	5.10981	1.00281e-43	2.22508e-41	Noc4l	ENSMUSG00000033294	Noc4l	ENSMUSG00000033294:Noc4l.2	0.0116319	chr5	110652848	110653848
ENSMUSG00000033615	1.11399	4.66864	6.04416e-21	7.15716e-19	Cplx1	ENSMUSG00000033615	Cplx1	ENSMUSG00000033615:Cplx1.1	0.0130244	chr5	108549524	108550524
ENSMUSG00000007080	0.7307	5.75892	1.01177e-14	7.94604e-13	Pole	ENSMUSG00000007080	Pole	ENSMUSG00000007080:Pole	0.0131609	chr5	110285819	110286819
ENSMUSG00000066894	0.538834	2.44588	0.016757	0.173209	Vsig10	ENSMUSG00000066894	Vsig10	ENSMUSG00000066894:Vsig10.1	0.0138434	chr5	117318804	117319804
ENSMUSG00000053647	1.45585	2.79514	8.2125e-12	5.17761e-10	Gper1	ENSMUSG00000053647	Gper1	ENSMUSG00000053647:Gper1.1	0.0227796	chr5	139422758	139423758
ENSMUSG00000029361	1.911	0.794547	4.01889e-06	0.000113884	Nos1	ENSMUSG00000029361	Nos1	ENSMUSG00000029361:Nos1.2	0.0234426	chr5	117841664	117842664
ENSMUSG00000029361	1.911	0.794547	4.01889e-06	0.000113884	Nos1	ENSMUSG00000029361	Nos1	ENSMUSG00000029361:Nos1.1	0.0243448	chr5	117841328	117842328
ENSMUSG00000001098	0.669263	6.30319	2.65559e-13	1.93591e-11	Kctd10	ENSMUSG00000001098	Kctd10	ENSMUSG00000001098:Kctd10.5	0.0245318	chr5	114380008	114381008
ENSMUSG00000001098	0.669263	6.30319	2.65559e-13	1.93591e-11	Kctd10	ENSMUSG00000001098	Kctd10	ENSMUSG00000001098:Kctd10.4	0.026089	chr5	114379986	114380986
ENSMUSG00000033294	1.42993	5.10981	1.00281e-43	2.22508e-41	Noc4l	ENSMUSG00000033294	Noc4l	ENSMUSG00000033294:Noc4l.5	0.0280759	chr5	110652917	110653917
ENSMUSG00000105835	5.4019	-2.93514	0.000506691	0.00915409	Gm43552	ENSMUSG00000105835	Gm43552	ENSMUSG00000105835:Gm43552	0.0338609	chr5	65492333	65493333
ENSMUSG00000029313	0.519087	5.54864	4.66856e-08	1.83325e-06	Aff1	ENSMUSG00000029313	Aff1	ENSMUSG00000029313:Aff1.2	0.0360468	chr5	103754046	103755046
ENSMUSG00000033294	1.42993	5.10981	1.00281e-43	2.22508e-41	Noc4l	ENSMUSG00000033294	Noc4l	ENSMUSG00000033294:Noc4l.1	0.0363242	chr5	110652759	110653759
ENSMUSG00000040584	1.56807	-2.05095	0.0301801	0.271978	Abcb1a	ENSMUSG00000040584	Abcb1a	ENSMUSG00000040584:Abcb1a	0.0400897	chr5	8659555	8660555
ENSMUSG00000002297	0.52807	5.03825	2.27502e-07	8.04356e-06	Dbf4	ENSMUSG00000002297	Dbf4	ENSMUSG00000002297:Dbf4.6	0.0426406	chr5	8422194	8423194
ENSMUSG00000002297	0.52807	5.03825	2.27502e-07	8.04356e-06	Dbf4	ENSMUSG00000002297	Dbf4	ENSMUSG00000002297:Dbf4.5	0.0426666	chr5	8422181	8423181
ENSMUSG00000002297	0.52807	5.03825	2.27502e-07	8.04356e-06	Dbf4	ENSMUSG00000002297	Dbf4	ENSMUSG00000002297:Dbf4.7	0.0426918	chr5	8422216	8423216
ENSMUSG00000002297	0.52807	5.03825	2.27502e-07	8.04356e-06	Dbf4	ENSMUSG00000002297	Dbf4	ENSMUSG00000002297:Dbf4.4	0.0450679	chr5	8422169	8423169
ENSMUSG00000037428	0.835952	0.966844	0.0188489	0.190481	Vgf	ENSMUSG00000037428	Vgf	ENSMUSG00000037428:Vgf.2	0.0461709	chr5	137029842	137030842
ENSMUSG00000079659	0.633001	2.89381	0.00135335	0.0215162	Tmem243	ENSMUSG00000079659	Tmem243	ENSMUSG00000079659:Tmem243	0.0472051	chr5	9100146	9101146
ENSMUSG00000066952	4.22183	-3.72763	0.0232638	0.222922	Myo1h	ENSMUSG00000066952	Myo1h	ENSMUSG00000066952:Myo1h.2	0.0472917	chr5	114356317	114357317
ENSMUSG00000053647	1.45585	2.79514	8.2125e-12	5.17761e-10	Gper1	ENSMUSG00000053647	Gper1	ENSMUSG00000053647:Gper1	0.0502927	chr5	139422629	139423629
ENSMUSG00000002297	0.52807	5.03825	2.27502e-07	8.04356e-06	Dbf4	ENSMUSG00000002297	Dbf4	ENSMUSG00000002297:Dbf4.3	0.051705	chr5	8422082	8423082
ENSMUSG00000037428	0.835952	0.966844	0.0188489	0.190481	Vgf	ENSMUSG00000037428	Vgf	ENSMUSG00000037428:Vgf.1	0.0537458	chr5	137029773	137030773
ENSMUSG00000089809	1.31989	0.187859	0.00600784	0.0756439	Rasgef1b	ENSMUSG00000089809	Rasgef1b	ENSMUSG00000089809:Rasgef1b.4	0.0540136	chr5	99728545	99729545
ENSMUSG00000004846	0.566515	5.98002	2.95557e-10	1.58189e-08	Plod3	ENSMUSG00000004846	Plod3	ENSMUSG00000004846:Plod3.2	0.0540177	chr5	136986954	136987954
ENSMUSG00000089809	1.31989	0.187859	0.00600784	0.0756439	Rasgef1b	ENSMUSG00000089809	Rasgef1b	ENSMUSG00000089809:Rasgef1b.5	0.0570331	chr5	99728561	99729561
ENSMUSG00000089809	1.31989	0.187859	0.00600784	0.0756439	Rasgef1b	ENSMUSG00000089809	Rasgef1b	ENSMUSG00000089809:Rasgef1b.3	0.0574048	chr5	99728317	99729317
ENSMUSG00000039106	4.993	0.299629	2.73165e-19	3.0014e-17	Htr5a	ENSMUSG00000039106	Htr5a	ENSMUSG00000039106:Htr5a	0.0582025	chr5	27841627	27842627
ENSMUSG00000029319	0.516673	4.83157	8.6873e-07	2.79436e-05	Coq2	ENSMUSG00000029319	Coq2	ENSMUSG00000029319:Coq2.2	0.0605149	chr5	100673749	100674749
ENSMUSG00000079659	0.633001	2.89381	0.00135335	0.0215162	Tmem243	ENSMUSG00000079659	Tmem243	ENSMUSG00000079659:Tmem243.1	0.0605471	chr5	9100225	9101225
ENSMUSG00000092094	2.1728	-2.59677	0.0223177	0.216123	Zfp804b	ENSMUSG00000092094	Zfp804b	ENSMUSG00000092094:Zfp804b.1	0.0612923	chr5	7344256	7345256
ENSMUSG00000029283	0.720042	4.50609	9.29939e-10	4.75455e-08	Cdc7	ENSMUSG00000029283	Cdc7	ENSMUSG00000029283:Cdc7.3	0.0625694	chr5	106964496	106965496
ENSMUSG00000048520	2.65687	-3.27796	0.0385664	0.32256	Fbxl13	ENSMUSG00000048520	Fbxl13	ENSMUSG00000048520:Fbxl13.4	0.0628	chr5	21645134	21646134
ENSMUSG00000029319	0.516673	4.83157	8.6873e-07	2.79436e-05	Coq2	ENSMUSG00000029319	Coq2	ENSMUSG00000029319:Coq2.3	0.0632028	chr5	100673784	100674784
ENSMUSG00000033467	0.506374	3.3708	0.00355392	0.0488403	Crlf2	ENSMUSG00000033467	Crlf2	ENSMUSG00000033467:Crlf2.1	0.0643927	chr5	109558436	109559436
ENSMUSG00000048520	2.65687	-3.27796	0.0385664	0.32256	Fbxl13	ENSMUSG00000048520	Fbxl13	ENSMUSG00000048520:Fbxl13.3	0.0647598	chr5	21645105	21646105
ENSMUSG00000066894	0.538834	2.44588	0.016757	0.173209	Vsig10	ENSMUSG00000066894	Vsig10	ENSMUSG00000066894:Vsig10	0.0654703	chr5	117318561	117319561
ENSMUSG00000033970	0.502346	4.32732	5.78074e-05	0.00130546	Rfc3	ENSMUSG00000033970	Rfc3	ENSMUSG00000033970:Rfc3.2	0.0656397	chr5	151650702	151651702
ENSMUSG00000029319	0.516673	4.83157	8.6873e-07	2.79436e-05	Coq2	ENSMUSG00000029319	Coq2	ENSMUSG00000029319:Coq2.1	0.0656477	chr5	100673656	100674656
ENSMUSG00000048520	2.65687	-3.27796	0.0385664	0.32256	Fbxl13	ENSMUSG00000048520	Fbxl13	ENSMUSG00000048520:Fbxl13.2	0.0658821	chr5	21645087	21646087
ENSMUSG00000029405	0.622503	7.76688	9.22474e-15	7.25722e-13	G3bp2	ENSMUSG00000029405	G3bp2	ENSMUSG00000029405:G3bp2.2	0.0666721	chr5	92082738	92083738
ENSMUSG00000033970	0.502346	4.32732	5.78074e-05	0.00130546	Rfc3	ENSMUSG00000033970	Rfc3	ENSMUSG00000033970:Rfc3.4	0.0668917	chr5	151650742	151651742
ENSMUSG00000033970	0.502346	4.32732	5.78074e-05	0.00130546	Rfc3	ENSMUSG00000033970	Rfc3	ENSMUSG00000033970:Rfc3.3	0.0671596	chr5	151650727	151651727
ENSMUSG00000029283	0.720042	4.50609	9.29939e-10	4.75455e-08	Cdc7	ENSMUSG00000029283	Cdc7	ENSMUSG00000029283:Cdc7	0.0687404	chr5	106963800	106964800
ENSMUSG00000048520	2.65687	-3.27796	0.0385664	0.32256	Fbxl13	ENSMUSG00000048520	Fbxl13	ENSMUSG00000048520:Fbxl13.1	0.0702797	chr5	21645057	21646057
ENSMUSG00000029283	0.720042	4.50609	9.29939e-10	4.75455e-08	Cdc7	ENSMUSG00000029283	Cdc7	ENSMUSG00000029283:Cdc7.1	0.0704769	chr5	106963864	106964864
ENSMUSG00000029730	0.624042	6.71323	4.45311e-13	3.15602e-11	Mcm7	ENSMUSG00000029730	Mcm7	ENSMUSG00000029730:Mcm7.7	0.0713776	chr5	138171317	138172317
ENSMUSG00000004846	0.566515	5.98002	2.95557e-10	1.58189e-08	Plod3	ENSMUSG00000004846	Plod3	ENSMUSG00000004846:Plod3	0.076637	chr5	136986497	136987497
ENSMUSG00000029283	0.720042	4.50609	9.29939e-10	4.75455e-08	Cdc7	ENSMUSG00000029283	Cdc7	ENSMUSG00000029283:Cdc7.2	0.0771027	chr5	106964039	106965039
ENSMUSG00000054520	1.88597	1.76418	2.78388e-10	1.50054e-08	Sh3bp2	ENSMUSG00000054520	Sh3bp2	ENSMUSG00000054520:Sh3bp2.2	0.0793734	chr5	34549054	34550054
ENSMUSG00000029405	0.622503	7.76688	9.22474e-15	7.25722e-13	G3bp2	ENSMUSG00000029405	G3bp2	ENSMUSG00000029405:G3bp2.3	0.0822433	chr5	92082763	92083763
ENSMUSG00000034663	1.73647	5.58833	6.32012e-67	1.85179e-64	Bmp2k	ENSMUSG00000034663	Bmp2k	ENSMUSG00000034663:Bmp2k	0.0836787	chr5	96997167	96998167
ENSMUSG00000033467	0.506374	3.3708	0.00355392	0.0488403	Crlf2	ENSMUSG00000033467	Crlf2	ENSMUSG00000033467:Crlf2.2	0.0857884	chr5	109558493	109559493
ENSMUSG00000029363	0.633426	4.51595	7.71981e-08	2.95773e-06	Rfc5	ENSMUSG00000029363	Rfc5	ENSMUSG00000029363:Rfc5.4	0.0859449	chr5	117388546	117389546
ENSMUSG00000040274	0.507863	5.3827	3.0021e-06	8.69032e-05	Cdk6	ENSMUSG00000040274	Cdk6	ENSMUSG00000040274:Cdk6.3	0.0920993	chr5	3343790	3344790
ENSMUSG00000029363	0.633426	4.51595	7.71981e-08	2.95773e-06	Rfc5	ENSMUSG00000029363	Rfc5	ENSMUSG00000029363:Rfc5.3	0.0921353	chr5	117388522	117389522
ENSMUSG00000033540	0.65101	2.8882	0.00125634	0.0202485	Idua	ENSMUSG00000033540	Idua	ENSMUSG00000033540:Idua.3	0.0947877	chr5	108668937	108669937
ENSMUSG00000029505	0.538401	7.98305	1.73706e-11	1.07731e-09	Ep400	ENSMUSG00000029505	Ep400	ENSMUSG00000029505:Ep400.5	0.0976273	chr5	110769655	110770655
ENSMUSG00000033540	0.65101	2.8882	0.00125634	0.0202485	Idua	ENSMUSG00000033540	Idua	ENSMUSG00000033540:Idua.1	0.0980647	chr5	108668584	108669584
ENSMUSG00000029313	0.519087	5.54864	4.66856e-08	1.83325e-06	Aff1	ENSMUSG00000029313	Aff1	ENSMUSG00000029313:Aff1.1	0.0987774	chr5	103753640	103754640
ENSMUSG00000034573	0.974502	5.67292	7.35095e-25	1.04999e-22	Ptpn13	ENSMUSG00000034573	Ptpn13	ENSMUSG00000034573:Ptpn13.1	0.105077	chr5	103424979	103425979
ENSMUSG00000066952	4.22183	-3.72763	0.0232638	0.222922	Myo1h	ENSMUSG00000066952	Myo1h	ENSMUSG00000066952:Myo1h.3	0.106163	chr5	114356884	114357884
ENSMUSG00000029730	0.624042	6.71323	4.45311e-13	3.15602e-11	Mcm7	ENSMUSG00000029730	Mcm7	ENSMUSG00000029730:Mcm7.8	0.10791	chr5	138171922	138172922
ENSMUSG00000033540	0.65101	2.8882	0.00125634	0.0202485	Idua	ENSMUSG00000033540	Idua	ENSMUSG00000033540:Idua.2	0.110204	chr5	108668799	108669799
ENSMUSG00000037685	0.524441	7.18724	1.18468e-09	5.92445e-08	Atp8a1	ENSMUSG00000037685	Atp8a1	ENSMUSG00000037685:Atp8a1.6	0.117071	chr5	67846795	67847795
ENSMUSG00000037685	0.524441	7.18724	1.18468e-09	5.92445e-08	Atp8a1	ENSMUSG00000037685	Atp8a1	ENSMUSG00000037685:Atp8a1.7	0.117145	chr5	67846870	67847870
ENSMUSG00000001098	0.669263	6.30319	2.65559e-13	1.93591e-11	Kctd10	ENSMUSG00000001098	Kctd10	ENSMUSG00000001098:Kctd10.2	0.118254	chr5	114369707	114370707
ENSMUSG00000037685	0.524441	7.18724	1.18468e-09	5.92445e-08	Atp8a1	ENSMUSG00000037685	Atp8a1	ENSMUSG00000037685:Atp8a1.8	0.118628	chr5	67846932	67847932
ENSMUSG00000043635	2.90094	5.31914	9.19592e-155	4.20327e-152	Adamts3	ENSMUSG00000043635	Adamts3	ENSMUSG00000043635:Adamts3.2	0.123028	chr5	89882834	89883834
ENSMUSG00000034573	0.974502	5.67292	7.35095e-25	1.04999e-22	Ptpn13	ENSMUSG00000034573	Ptpn13	ENSMUSG00000034573:Ptpn13	0.123346	chr5	103424702	103425702
ENSMUSG00000029330	1.13851	-0.185216	0.0117926	0.131052	Cds1	ENSMUSG00000029330	Cds1	ENSMUSG00000029330:Cds1	0.124569	chr5	101764608	101765608
ENSMUSG00000097271	1.1105	-0.670263	0.0228456	0.220301	Gm9903	ENSMUSG00000097271	Gm9903	ENSMUSG00000097271:Gm9903	0.125033	chr5	33629403	33630403
ENSMUSG00000043635	2.90094	5.31914	9.19592e-155	4.20327e-152	Adamts3	ENSMUSG00000043635	Adamts3	ENSMUSG00000043635:Adamts3.1	0.126655	chr5	89882435	89883435
ENSMUSG00000097237	1.17906	-0.629962	0.01457	0.155056	Gm26519	ENSMUSG00000097237	Gm26519	ENSMUSG00000097237:Gm26519	0.138194	chr5	105400723	105401723
ENSMUSG00000056735	0.674311	2.80601	0.00116499	0.019038	A930024E05Rik	ENSMUSG00000056735	A930024E05Rik	ENSMUSG00000056735:A930024E05Rik	0.138779	chr5	122988832	122989832
ENSMUSG00000029405	0.622503	7.76688	9.22474e-15	7.25722e-13	G3bp2	ENSMUSG00000029405	G3bp2	ENSMUSG00000029405:G3bp2.4	0.143957	chr5	92083013	92084013
ENSMUSG00000029414	0.812923	5.2923	1.46742e-15	1.23523e-13	Kntc1	ENSMUSG00000029414	Kntc1	ENSMUSG00000029414:Kntc1	0.146626	chr5	123749199	123750199
ENSMUSG00000059866	0.751056	2.33526	0.0012652	0.0203769	Tnip2	ENSMUSG00000059866	Tnip2	ENSMUSG00000059866:Tnip2.1	0.14738	chr5	34513160	34514160
ENSMUSG00000059866	0.751056	2.33526	0.0012652	0.0203769	Tnip2	ENSMUSG00000059866	Tnip2	ENSMUSG00000059866:Tnip2.3	0.150721	chr5	34513438	34514438
ENSMUSG00000059866	0.751056	2.33526	0.0012652	0.0203769	Tnip2	ENSMUSG00000059866	Tnip2	ENSMUSG00000059866:Tnip2.4	0.152091	chr5	34513463	34514463
ENSMUSG00000039682	1.79913	6.94256	1.38187e-99	4.97342e-97	Lap3	ENSMUSG00000039682	Lap3	ENSMUSG00000039682:Lap3.1	0.152702	chr5	45492993	45493993
ENSMUSG00000029405	0.622503	7.76688	9.22474e-15	7.25722e-13	G3bp2	ENSMUSG00000029405	G3bp2	ENSMUSG00000029405:G3bp2.5	0.152985	chr5	92083057	92084057
ENSMUSG00000059866	0.751056	2.33526	0.0012652	0.0203769	Tnip2	ENSMUSG00000059866	Tnip2	ENSMUSG00000059866:Tnip2.5	0.154218	chr5	34513491	34514491
ENSMUSG00000034981	1.08837	3.4725	1.1363e-09	5.70121e-08	Parm1	ENSMUSG00000034981	Parm1	ENSMUSG00000034981:Parm1	0.15503	chr5	91517093	91518093
ENSMUSG00000043614	0.808258	3.67438	4.0366e-07	1.36267e-05	Vps37d	ENSMUSG00000043614	Vps37d	ENSMUSG00000043614:Vps37d	0.156322	chr5	135077766	135078766
ENSMUSG00000029405	0.622503	7.76688	9.22474e-15	7.25722e-13	G3bp2	ENSMUSG00000029405	G3bp2	ENSMUSG00000029405:G3bp2.6	0.158797	chr5	92083158	92084158
ENSMUSG00000059866	0.751056	2.33526	0.0012652	0.0203769	Tnip2	ENSMUSG00000059866	Tnip2	ENSMUSG00000059866:Tnip2.2	0.159164	chr5	34513349	34514349
ENSMUSG00000029405	0.622503	7.76688	9.22474e-15	7.25722e-13	G3bp2	ENSMUSG00000029405	G3bp2	ENSMUSG00000029405:G3bp2.7	0.159959	chr5	92083218	92084218
ENSMUSG00000028970	0.555134	2.46293	0.013557	0.146492	Abcb1b	ENSMUSG00000028970	Abcb1b	ENSMUSG00000028970:Abcb1b	0.161728	chr5	8797644	8798644
ENSMUSG00000028954	1.14892	6.23208	6.0544e-37	1.18263e-34	Nub1	ENSMUSG00000028954	Nub1	ENSMUSG00000028954:Nub1.2	0.163581	chr5	24685465	24686465
ENSMUSG00000054520	1.88597	1.76418	2.78388e-10	1.50054e-08	Sh3bp2	ENSMUSG00000054520	Sh3bp2	ENSMUSG00000054520:Sh3bp2.3	0.164666	chr5	34549166	34550166
ENSMUSG00000029730	0.624042	6.71323	4.45311e-13	3.15602e-11	Mcm7	ENSMUSG00000029730	Mcm7	ENSMUSG00000029730:Mcm7.6	0.16869	chr5	138170766	138171766
ENSMUSG00000039682	1.79913	6.94256	1.38187e-99	4.97342e-97	Lap3	ENSMUSG00000039682	Lap3	ENSMUSG00000039682:Lap3	0.169044	chr5	45492852	45493852
ENSMUSG00000029730	0.624042	6.71323	4.45311e-13	3.15602e-11	Mcm7	ENSMUSG00000029730	Mcm7	ENSMUSG00000029730:Mcm7.5	0.169489	chr5	138170741	138171741
ENSMUSG00000040274	0.507863	5.3827	3.0021e-06	8.69032e-05	Cdk6	ENSMUSG00000040274	Cdk6	ENSMUSG00000040274:Cdk6.2	0.173415	chr5	3343382	3344382
ENSMUSG00000072941	2.07434	2.40764	0.0190302	0.192059	Sod3	ENSMUSG00000072941	Sod3	ENSMUSG00000072941:Sod3	0.174922	chr5	52363269	52364269
ENSMUSG00000042726	2.57528	7.51559	6.81712e-197	3.58157e-194	Trafd1	ENSMUSG00000042726	Trafd1	ENSMUSG00000042726:Trafd1.3	0.175565	chr5	121384860	121385860
ENSMUSG00000029505	0.538401	7.98305	1.73706e-11	1.07731e-09	Ep400	ENSMUSG00000029505	Ep400	ENSMUSG00000029505:Ep400.8	0.176157	chr5	110770217	110771217
ENSMUSG00000086401	1.29872	0.604895	0.000588629	0.0104405	Gm15559	ENSMUSG00000086401	Gm15559	ENSMUSG00000086401:Gm15559	0.179155	chr5	110770427	110771427
ENSMUSG00000029505	0.538401	7.98305	1.73706e-11	1.07731e-09	Ep400	ENSMUSG00000029505	Ep400	ENSMUSG00000029505:Ep400.7	0.179567	chr5	110770085	110771085
ENSMUSG00000028954	1.14892	6.23208	6.0544e-37	1.18263e-34	Nub1	ENSMUSG00000028954	Nub1	ENSMUSG00000028954:Nub1.1	0.179906	chr5	24685302	24686302
ENSMUSG00000042726	2.57528	7.51559	6.81712e-197	3.58157e-194	Trafd1	ENSMUSG00000042726	Trafd1	ENSMUSG00000042726:Trafd1.4	0.180569	chr5	121384909	121385909
ENSMUSG00000029505	0.538401	7.98305	1.73706e-11	1.07731e-09	Ep400	ENSMUSG00000029505	Ep400	ENSMUSG00000029505:Ep400.6	0.181758	chr5	110770027	110771027
ENSMUSG00000037428	0.835952	0.966844	0.0188489	0.190481	Vgf	ENSMUSG00000037428	Vgf	ENSMUSG00000037428:Vgf.3	0.182622	chr5	137030179	137031179
ENSMUSG00000042249	0.559046	3.67566	0.000350761	0.00663052	Grk3	ENSMUSG00000042249	Grk3	ENSMUSG00000042249:Grk3.3	0.183318	chr5	113015014	113016014
ENSMUSG00000042249	0.559046	3.67566	0.000350761	0.00663052	Grk3	ENSMUSG00000042249	Grk3	ENSMUSG00000042249:Grk3.2	0.183321	chr5	113015003	113016003
ENSMUSG00000028954	1.14892	6.23208	6.0544e-37	1.18263e-34	Nub1	ENSMUSG00000028954	Nub1	ENSMUSG00000028954:Nub1	0.184177	chr5	24685010	24686010
ENSMUSG00000106892	7.24983	-1.35871	4.29949e-08	1.70001e-06	Gm42791	ENSMUSG00000106892	Gm42791	ENSMUSG00000106892:Gm42791.1	0.18421	chr5	148994647	148995647
ENSMUSG00000106209	1.47267	-0.0193168	0.00105251	0.0173865	Gm42918	ENSMUSG00000106209	Gm42918	ENSMUSG00000106209:Gm42918	0.185381	chr5	121385000	121386000
ENSMUSG00000029730	0.624042	6.71323	4.45311e-13	3.15602e-11	Mcm7	ENSMUSG00000029730	Mcm7	ENSMUSG00000029730:Mcm7.4	0.185871	chr5	138170517	138171517
ENSMUSG00000044681	0.579054	1.86016	0.0384952	0.322201	Cnpy1	ENSMUSG00000044681	Cnpy1	ENSMUSG00000044681:Cnpy1.1	0.187959	chr5	28209668	28210668
ENSMUSG00000042726	2.57528	7.51559	6.81712e-197	3.58157e-194	Trafd1	ENSMUSG00000042726	Trafd1	ENSMUSG00000042726:Trafd1.5	0.190159	chr5	121385074	121386074
ENSMUSG00000005107	1.17873	2.22394	4.00799e-06	0.000113646	Slc2a9	ENSMUSG00000005107	Slc2a9	ENSMUSG00000005107:Slc2a9.1	0.190229	chr5	38479631	38480631
ENSMUSG00000042726	2.57528	7.51559	6.81712e-197	3.58157e-194	Trafd1	ENSMUSG00000042726	Trafd1	ENSMUSG00000042726:Trafd1.6	0.193608	chr5	121385131	121386131
ENSMUSG00000005107	1.17873	2.22394	4.00799e-06	0.000113646	Slc2a9	ENSMUSG00000005107	Slc2a9	ENSMUSG00000005107:Slc2a9.2	0.195061	chr5	38479658	38480658
ENSMUSG00000038770	4.02822	-3.72767	0.0275058	0.253611	Kpna7	ENSMUSG00000038770	Kpna7	ENSMUSG00000038770:Kpna7.5	0.195706	chr5	145083530	145084530
ENSMUSG00000028864	2.02139	0.342125	1.10897e-06	3.51406e-05	Hgf	ENSMUSG00000028864	Hgf	ENSMUSG00000028864:Hgf.1	0.197946	chr5	16553246	16554246
ENSMUSG00000042249	0.559046	3.67566	0.000350761	0.00663052	Grk3	ENSMUSG00000042249	Grk3	ENSMUSG00000042249:Grk3.4	0.204199	chr5	113015291	113016291
ENSMUSG00000033540	0.65101	2.8882	0.00125634	0.0202485	Idua	ENSMUSG00000033540	Idua	ENSMUSG00000033540:Idua	0.206673	chr5	108659809	108660809
ENSMUSG00000028864	2.02139	0.342125	1.10897e-06	3.51406e-05	Hgf	ENSMUSG00000028864	Hgf	ENSMUSG00000028864:Hgf	0.207657	chr5	16553015	16554015
ENSMUSG00000005107	1.17873	2.22394	4.00799e-06	0.000113646	Slc2a9	ENSMUSG00000005107	Slc2a9	ENSMUSG00000005107:Slc2a9.3	0.21087	chr5	38479682	38480682
ENSMUSG00000033467	0.506374	3.3708	0.00355392	0.0488403	Crlf2	ENSMUSG00000033467	Crlf2	ENSMUSG00000033467:Crlf2	0.214293	chr5	109555973	109556973
ENSMUSG00000097191	1.78531	-2.37366	0.032741	0.289215	Mm2pr	ENSMUSG00000097191	Mm2pr	ENSMUSG00000097191:Mm2pr.1	0.220773	chr5	149183563	149184563
ENSMUSG00000044681	0.579054	1.86016	0.0384952	0.322201	Cnpy1	ENSMUSG00000044681	Cnpy1	ENSMUSG00000044681:Cnpy1	0.222053	chr5	28209522	28210522
ENSMUSG00000091623	1.16766	-0.56937	0.0169366	0.174679	Gm17092	ENSMUSG00000091623	Gm17092	ENSMUSG00000091623:Gm17092.1	0.225904	chr5	99978539	99979539
ENSMUSG00000063531	0.973997	2.56789	1.33823e-05	0.000340958	Sema3e	ENSMUSG00000063531	Sema3e	ENSMUSG00000063531:Sema3e	0.234372	chr5	14024754	14025754
ENSMUSG00000035273	2.35702	-1.12682	5.61851e-05	0.0012726	Hpse	ENSMUSG00000035273	Hpse	ENSMUSG00000035273:Hpse.1	0.234562	chr5	100719216	100720216
ENSMUSG00000035273	2.35702	-1.12682	5.61851e-05	0.0012726	Hpse	ENSMUSG00000035273	Hpse	ENSMUSG00000035273:Hpse	0.234562	chr5	100719205	100720205
ENSMUSG00000051391	0.61108	8.21329	3.96229e-14	2.99848e-12	Ywhag	ENSMUSG00000051391	Ywhag	ENSMUSG00000051391:Ywhag	0.235533	chr5	135934052	135935052
ENSMUSG00000051391	0.61108	8.21329	3.96229e-14	2.99848e-12	Ywhag	ENSMUSG00000051391	Ywhag	ENSMUSG00000051391:Ywhag.1	0.238886	chr5	135934098	135935098
ENSMUSG00000051391	0.61108	8.21329	3.96229e-14	2.99848e-12	Ywhag	ENSMUSG00000051391	Ywhag	ENSMUSG00000051391:Ywhag.2	0.240501	chr5	135934116	135935116
ENSMUSG00000029177	0.505529	6.0515	1.16658e-07	4.35636e-06	Cenpa	ENSMUSG00000029177	Cenpa	ENSMUSG00000029177:Cenpa.1	0.241437	chr5	30666425	30667425
ENSMUSG00000029177	0.505529	6.0515	1.16658e-07	4.35636e-06	Cenpa	ENSMUSG00000029177	Cenpa	ENSMUSG00000029177:Cenpa	0.244702	chr5	30666255	30667255
ENSMUSG00000029730	0.624042	6.71323	4.45311e-13	3.15602e-11	Mcm7	ENSMUSG00000029730	Mcm7	ENSMUSG00000029730:Mcm7.3	0.248077	chr5	138170161	138171161
ENSMUSG00000040274	0.507863	5.3827	3.0021e-06	8.69032e-05	Cdk6	ENSMUSG00000040274	Cdk6	ENSMUSG00000040274:Cdk6.1	0.25584	chr5	3343210	3344210
ENSMUSG00000070639	0.701442	7.1893	3.10529e-17	2.95086e-15	Lrrc8b	ENSMUSG00000070639	Lrrc8b	ENSMUSG00000070639:Lrrc8b	0.258447	chr5	105415253	105416253
ENSMUSG00000034573	0.974502	5.67292	7.35095e-25	1.04999e-22	Ptpn13	ENSMUSG00000034573	Ptpn13	ENSMUSG00000034573:Ptpn13.2	0.259159	chr5	103529044	103530044
ENSMUSG00000029413	0.852757	0.238089	0.0435008	0.353115	Naaa	ENSMUSG00000029413	Naaa	ENSMUSG00000029413:Naaa.2	0.264525	chr5	92277668	92278668
ENSMUSG00000091623	1.16766	-0.56937	0.0169366	0.174679	Gm17092	ENSMUSG00000091623	Gm17092	ENSMUSG00000091623:Gm17092	0.264743	chr5	99977164	99978164
ENSMUSG00000028883	0.81009	3.78383	3.05261e-07	1.05544e-05	Sema3a	ENSMUSG00000028883	Sema3a	ENSMUSG00000028883:Sema3a.7	0.270932	chr5	13399055	13400055
ENSMUSG00000054520	1.88597	1.76418	2.78388e-10	1.50054e-08	Sh3bp2	ENSMUSG00000054520	Sh3bp2	ENSMUSG00000054520:Sh3bp2	0.273005	chr5	34525320	34526320
ENSMUSG00000029380	2.64159	-2.59538	0.0147297	0.156356	Cxcl1	ENSMUSG00000029380	Cxcl1	ENSMUSG00000029380:Cxcl1	0.273948	chr5	90890720	90891720
ENSMUSG00000089809	1.31989	0.187859	0.00600784	0.0756439	Rasgef1b	ENSMUSG00000089809	Rasgef1b	ENSMUSG00000089809:Rasgef1b.2	0.281747	chr5	99252427	99253427
ENSMUSG00000073234	2.04415	-2.27306	0.0130972	0.142637	Fam237b	ENSMUSG00000073234	Gm8773	ENSMUSG00000073234:Gm8773	0.287424	chr5	5573277	5574277
ENSMUSG00000029649	0.772167	6.32578	6.32001e-19	6.70244e-17	Pomp	ENSMUSG00000029649	Pomp	ENSMUSG00000029649:Pomp	0.297219	chr5	147859939	147860939
ENSMUSG00000028864	2.02139	0.342125	1.10897e-06	3.51406e-05	Hgf	ENSMUSG00000028864	Hgf	ENSMUSG00000028864:Hgf.2	0.306771	chr5	16553406	16554406
ENSMUSG00000041548	0.589464	4.12658	0.0367063	0.314003	Hspb8	ENSMUSG00000041548	Hspb8	ENSMUSG00000041548:Hspb8.1	0.312217	chr5	116422364	116423364
ENSMUSG00000028883	0.81009	3.78383	3.05261e-07	1.05544e-05	Sema3a	ENSMUSG00000028883	Sema3a	ENSMUSG00000028883:Sema3a.5	0.314531	chr5	13398475	13399475
ENSMUSG00000029364	1.21945	7.15933	5.71731e-47	1.3132e-44	Wsb2	ENSMUSG00000029364	Wsb2	ENSMUSG00000029364:Wsb2	0.319475	chr5	117356782	117357782
ENSMUSG00000028883	0.81009	3.78383	3.05261e-07	1.05544e-05	Sema3a	ENSMUSG00000028883	Sema3a	ENSMUSG00000028883:Sema3a.6	0.33465	chr5	13398794	13399794
ENSMUSG00000029381	0.91906	3.90703	3.47647e-10	1.85348e-08	Shroom3	ENSMUSG00000029381	Shroom3	ENSMUSG00000029381:Shroom3.6	0.338486	chr5	92897471	92898471
ENSMUSG00000085237	2.77579	-3.37959	0.0474089	0.376296	Gm15406	ENSMUSG00000085237	Gm15406	ENSMUSG00000085237:Gm15406	0.352152	chr5	148996009	148997009
ENSMUSG00000085237	2.77579	-3.37959	0.0474089	0.376296	Gm15406	ENSMUSG00000085237	Gm15406	ENSMUSG00000085237:Gm15406.1	0.354563	chr5	148996066	148997066
ENSMUSG00000066952	4.22183	-3.72763	0.0232638	0.222922	Myo1h	ENSMUSG00000066952	Myo1h	ENSMUSG00000066952:Myo1h.1	0.368543	chr5	114314419	114315419
ENSMUSG00000005107	1.17873	2.22394	4.00799e-06	0.000113646	Slc2a9	ENSMUSG00000005107	Slc2a9	ENSMUSG00000005107:Slc2a9.4	0.371318	chr5	38479806	38480806
ENSMUSG00000029649	0.772167	6.32578	6.32001e-19	6.70244e-17	Pomp	ENSMUSG00000029649	Pomp	ENSMUSG00000029649:Pomp.1	0.403177	chr5	147860118	147861118
ENSMUSG00000105881	0.896511	0.0109246	0.0366893	0.314003	4932422M17Rik	ENSMUSG00000105881	4932422M17Rik	ENSMUSG00000105881:4932422M17Rik	0.408438	chr5	123138409	123139409
ENSMUSG00000029313	0.519087	5.54864	4.66856e-08	1.83325e-06	Aff1	ENSMUSG00000029313	Aff1	ENSMUSG00000029313:Aff1	0.410075	chr5	103691852	103692852
ENSMUSG00000002633	1.66785	0.112716	0.00015582	0.00318953	Shh	ENSMUSG00000002633	Shh	ENSMUSG00000002633:Shh	0.431814	chr5	28466756	28467756
ENSMUSG00000029135	1.06687	2.94154	4.99997e-06	0.000139014	Fosl2	ENSMUSG00000029135	Fosl2	ENSMUSG00000029135:Fosl2	0.446728	chr5	32135279	32136279
ENSMUSG00000043635	2.90094	5.31914	9.19592e-155	4.20327e-152	Adamts3	ENSMUSG00000043635	Adamts3	ENSMUSG00000043635:Adamts3	0.451819	chr5	89881647	89882647
ENSMUSG00000059325	0.809326	3.93797	4.23535e-08	1.67901e-06	Hopx	ENSMUSG00000059325	Hopx	ENSMUSG00000059325:Hopx	0.472889	chr5	77094753	77095753
ENSMUSG00000040274	0.507863	5.3827	3.0021e-06	8.69032e-05	Cdk6	ENSMUSG00000040274	Cdk6	ENSMUSG00000040274:Cdk6	0.474368	chr5	3340963	3341963
ENSMUSG00000059325	0.809326	3.93797	4.23535e-08	1.67901e-06	Hopx	ENSMUSG00000059325	Hopx	ENSMUSG00000059325:Hopx.1	0.475041	chr5	77094777	77095777
ENSMUSG00000029605	5.78029	2.40756	7.72968e-08	2.95903e-06	Oas1b	ENSMUSG00000029605	Oas1b	ENSMUSG00000029605:Oas1b	0.476351	chr5	120812114	120813114
ENSMUSG00000001166	2.70436	-0.0467981	4.13615e-08	1.64539e-06	Oas1c	ENSMUSG00000001166	Oas1c	ENSMUSG00000001166:Oas1c	0.480619	chr5	120811988	120812988
ENSMUSG00000001166	2.70436	-0.0467981	4.13615e-08	1.64539e-06	Oas1c	ENSMUSG00000001166	Oas1c	ENSMUSG00000001166:Oas1c.1	0.481479	chr5	120812014	120813014
ENSMUSG00000025747	0.802376	4.73417	2.21749e-13	1.62431e-11	Tyms	ENSMUSG00000025747	Tyms	ENSMUSG00000025747:Tyms.2	0.489214	chr5	30073078	30074078
ENSMUSG00000025747	0.802376	4.73417	2.21749e-13	1.62431e-11	Tyms	ENSMUSG00000025747	Tyms	ENSMUSG00000025747:Tyms.1	0.495993	chr5	30073052	30074052
ENSMUSG00000025747	0.802376	4.73417	2.21749e-13	1.62431e-11	Tyms	ENSMUSG00000025747	Tyms	ENSMUSG00000025747:Tyms.3	0.496034	chr5	30073116	30074116
ENSMUSG00000097356	4.47676	-3.60159	0.0114553	0.128207	Gm26774	ENSMUSG00000097356	Gm26774	ENSMUSG00000097356:Gm26774	0.00332707	chr6	6955400	6956400
ENSMUSG00000030067	2.61452	5.3123	2.33972e-114	8.91201e-112	Foxp1	ENSMUSG00000030067	Foxp1	ENSMUSG00000030067:Foxp1.18	0.0122145	chr6	99522147	99523147
ENSMUSG00000002897	0.605488	2.9071	0.0147608	0.156613	Il17ra	ENSMUSG00000002897	Il17ra	ENSMUSG00000002897:Il17ra	0.0130471	chr6	120462725	120463725
ENSMUSG00000064262	3.0503	-0.619628	3.93634e-08	1.57137e-06	Gimap8	ENSMUSG00000064262	Gimap8	ENSMUSG00000064262:Gimap8.1	0.0151422	chr6	48646850	48647850
ENSMUSG00000030067	2.61452	5.3123	2.33972e-114	8.91201e-112	Foxp1	ENSMUSG00000030067	Foxp1	ENSMUSG00000030067:Foxp1.19	0.0229696	chr6	99522221	99523221
ENSMUSG00000064262	3.0503	-0.619628	3.93634e-08	1.57137e-06	Gimap8	ENSMUSG00000064262	Gimap8	ENSMUSG00000064262:Gimap8	0.0344982	chr6	48646712	48647712
ENSMUSG00000100707	1.20698	1.12851	0.000668539	0.0116766	Gm28523	ENSMUSG00000100707	Gm28523	ENSMUSG00000100707:Gm28523	0.0405134	chr6	141249509	141250509
ENSMUSG00000041741	1.39438	5.82013	2.95774e-47	6.82789e-45	Pde3a	ENSMUSG00000041741	Pde3a	ENSMUSG00000041741:Pde3a.1	0.0408494	chr6	141249444	141250444
ENSMUSG00000030102	0.928636	5.27044	1.91239e-20	2.22422e-18	Itpr1	ENSMUSG00000030102	Itpr1	ENSMUSG00000030102:Itpr1.8	0.0437301	chr6	108417355	108418355
ENSMUSG00000049001	3.41982	1.15985	2.27792e-17	2.17823e-15	Ndnf	ENSMUSG00000049001	Ndnf	ENSMUSG00000049001:Ndnf	0.0446479	chr6	65671068	65672068
ENSMUSG00000038252	0.60098	7.89003	1.43074e-13	1.05139e-11	Ncapd2	ENSMUSG00000038252	Ncapd2	ENSMUSG00000038252:Ncapd2.12	0.0471515	chr6	125191201	125192201
ENSMUSG00000030104	1.63543	6.28667	3.10592e-58	8.40033e-56	Edem1	ENSMUSG00000030104	Edem1	ENSMUSG00000030104:Edem1	0.0483481	chr6	108828135	108829135
ENSMUSG00000038252	0.60098	7.89003	1.43074e-13	1.05139e-11	Ncapd2	ENSMUSG00000038252	Ncapd2	ENSMUSG00000038252:Ncapd2.10	0.0502571	chr6	125190990	125191990
ENSMUSG00000038252	0.60098	7.89003	1.43074e-13	1.05139e-11	Ncapd2	ENSMUSG00000038252	Ncapd2	ENSMUSG00000038252:Ncapd2.11	0.0523083	chr6	125191103	125192103
ENSMUSG00000023367	0.628796	5.6722	1.48413e-09	7.30998e-08	Tmem176a	ENSMUSG00000023367	Tmem176a	ENSMUSG00000023367:Tmem176a	0.052465	chr6	48840397	48841397
ENSMUSG00000001521	0.716292	5.79464	1.05681e-14	8.27134e-13	Tulp3	ENSMUSG00000001521	Tulp3	ENSMUSG00000001521:Tulp3.3	0.0557058	chr6	128355346	128356346
ENSMUSG00000001521	0.716292	5.79464	1.05681e-14	8.27134e-13	Tulp3	ENSMUSG00000001521	Tulp3	ENSMUSG00000001521:Tulp3.2	0.0600412	chr6	128355320	128356320
ENSMUSG00000023505	0.542778	5.97164	8.63675e-09	3.79221e-07	Cdca3	ENSMUSG00000023505	Cdca3	ENSMUSG00000023505:Cdca3.3	0.0671252	chr6	124829847	124830847
ENSMUSG00000023505	0.542778	5.97164	8.63675e-09	3.79221e-07	Cdca3	ENSMUSG00000023505	Cdca3	ENSMUSG00000023505:Cdca3.2	0.0695108	chr6	124829704	124830704
ENSMUSG00000030281	4.35585	3.15273	2.1609e-78	6.62889e-76	Il17rc	ENSMUSG00000030281	Il17rc	ENSMUSG00000030281:Il17rc.1	0.0717796	chr6	113471761	113472761
ENSMUSG00000009394	0.892692	6.64139	1.54572e-24	2.1739e-22	Syn2	ENSMUSG00000009394	Syn2	ENSMUSG00000009394:Syn2	0.0756817	chr6	115134404	115135404
ENSMUSG00000044156	1.46987	-2.05105	0.0427004	0.348278	Hepacam2	ENSMUSG00000044156	Hepacam2	ENSMUSG00000044156:Hepacam2.4	0.0861981	chr6	3497798	3498798
ENSMUSG00000092448	1.80588	-2.18049	0.0200383	0.199899	Gm20387	ENSMUSG00000092448	Gm20387	ENSMUSG00000092448:Gm20387	0.087779	chr6	110645416	110646416
ENSMUSG00000092035	1.13417	6.46272	9.43865e-22	1.17845e-19	Peg10	ENSMUSG00000092035	Peg10	ENSMUSG00000092035:Peg10.1	0.0879128	chr6	4746884	4747884
ENSMUSG00000038301	2.28476	6.20298	2.58865e-129	1.03791e-126	Snx10	ENSMUSG00000038301	Snx10	ENSMUSG00000038301:Snx10.1	0.0920671	chr6	51523460	51524460
ENSMUSG00000100121	4.81847	-3.48557	0.00526124	0.0678103	1700025N23Rik	ENSMUSG00000100121	1700025N23Rik	ENSMUSG00000100121:1700025N23Rik	0.0972894	chr6	39067098	39068098
ENSMUSG00000029771	1.51304	-1.17161	0.00730249	0.0890561	Irf5	ENSMUSG00000029771	Irf5	ENSMUSG00000029771:Irf5	0.0975209	chr6	29526103	29527103
ENSMUSG00000038301	2.28476	6.20298	2.58865e-129	1.03791e-126	Snx10	ENSMUSG00000038301	Snx10	ENSMUSG00000038301:Snx10	0.097793	chr6	51523379	51524379
ENSMUSG00000029910	0.7116	5.29899	4.2655e-13	3.03688e-11	Mad2l1	ENSMUSG00000029910	Mad2l1	ENSMUSG00000029910:Mad2l1	0.101637	chr6	66534907	66535907
ENSMUSG00000030067	2.61452	5.3123	2.33972e-114	8.91201e-112	Foxp1	ENSMUSG00000030067	Foxp1	ENSMUSG00000030067:Foxp1.9	0.102516	chr6	99095705	99096705
ENSMUSG00000029910	0.7116	5.29899	4.2655e-13	3.03688e-11	Mad2l1	ENSMUSG00000029910	Mad2l1	ENSMUSG00000029910:Mad2l1.1	0.105465	chr6	66535156	66536156
ENSMUSG00000030231	0.611682	4.26751	2.08157e-06	6.21452e-05	Plekha5	ENSMUSG00000030231	Plekha5	ENSMUSG00000030231:Plekha5.1	0.105657	chr6	140423638	140424638
ENSMUSG00000092035	1.13417	6.46272	9.43865e-22	1.17845e-19	Peg10	ENSMUSG00000092035	Peg10	ENSMUSG00000092035:Peg10	0.105806	chr6	4746784	4747784
ENSMUSG00000030231	0.611682	4.26751	2.08157e-06	6.21452e-05	Plekha5	ENSMUSG00000030231	Plekha5	ENSMUSG00000030231:Plekha5	0.112385	chr6	140423532	140424532
ENSMUSG00000029771	1.51304	-1.17161	0.00730249	0.0890561	Irf5	ENSMUSG00000029771	Irf5	ENSMUSG00000029771:Irf5.1	0.112473	chr6	29526186	29527186
ENSMUSG00000030067	2.61452	5.3123	2.33972e-114	8.91201e-112	Foxp1	ENSMUSG00000030067	Foxp1	ENSMUSG00000030067:Foxp1.16	0.116998	chr6	99520497	99521497
ENSMUSG00000038301	2.28476	6.20298	2.58865e-129	1.03791e-126	Snx10	ENSMUSG00000038301	Snx10	ENSMUSG00000038301:Snx10.2	0.124553	chr6	51523750	51524750
ENSMUSG00000030102	0.928636	5.27044	1.91239e-20	2.22422e-18	Itpr1	ENSMUSG00000030102	Itpr1	ENSMUSG00000030102:Itpr1	0.126146	chr6	108212574	108213574
ENSMUSG00000030102	0.928636	5.27044	1.91239e-20	2.22422e-18	Itpr1	ENSMUSG00000030102	Itpr1	ENSMUSG00000030102:Itpr1.1	0.127495	chr6	108212680	108213680
ENSMUSG00000030346	0.616235	3.63751	0.000171636	0.0034976	Rad51ap1	ENSMUSG00000030346	Rad51ap1	ENSMUSG00000030346:Rad51ap1.4	0.131573	chr6	126939046	126940046
ENSMUSG00000030346	0.616235	3.63751	0.000171636	0.0034976	Rad51ap1	ENSMUSG00000030346	Rad51ap1	ENSMUSG00000030346:Rad51ap1.5	0.132868	chr6	126939073	126940073
ENSMUSG00000097693	4.02822	-3.72767	0.0275058	0.253611	4930471M09Rik	ENSMUSG00000097693	4930471M09Rik	ENSMUSG00000097693:4930471M09Rik.2	0.133653	chr6	91440412	91441412
ENSMUSG00000030346	0.616235	3.63751	0.000171636	0.0034976	Rad51ap1	ENSMUSG00000030346	Rad51ap1	ENSMUSG00000030346:Rad51ap1.6	0.134776	chr6	126939087	126940087
ENSMUSG00000097693	4.02822	-3.72767	0.0275058	0.253611	4930471M09Rik	ENSMUSG00000097693	4930471M09Rik	ENSMUSG00000097693:4930471M09Rik.1	0.134904	chr6	91440354	91441354
ENSMUSG00000097596	1.59042	0.68868	0.000196317	0.00393564	Gm26673	ENSMUSG00000097596	Gm26673	ENSMUSG00000097596:Gm26673	0.135241	chr6	126718162	126719162
ENSMUSG00000002870	0.618341	6.51179	4.68869e-13	3.31032e-11	Mcm2	ENSMUSG00000002870	Mcm2	ENSMUSG00000002870:Mcm2.4	0.151812	chr6	88898188	88899188
ENSMUSG00000002870	0.618341	6.51179	4.68869e-13	3.31032e-11	Mcm2	ENSMUSG00000002870	Mcm2	ENSMUSG00000002870:Mcm2.5	0.151917	chr6	88898201	88899201
ENSMUSG00000002870	0.618341	6.51179	4.68869e-13	3.31032e-11	Mcm2	ENSMUSG00000002870	Mcm2	ENSMUSG00000002870:Mcm2.6	0.152172	chr6	88898280	88899280
ENSMUSG00000002870	0.618341	6.51179	4.68869e-13	3.31032e-11	Mcm2	ENSMUSG00000002870	Mcm2	ENSMUSG00000002870:Mcm2.3	0.15324	chr6	88898177	88899177
ENSMUSG00000030032	0.554024	2.55654	0.011624	0.129525	Wdr54	ENSMUSG00000030032	Wdr54	ENSMUSG00000030032:Wdr54.3	0.162677	chr6	83155879	83156879
ENSMUSG00000034023	0.665818	4.74621	4.58953e-09	2.11045e-07	Fancd2	ENSMUSG00000034023	Fancd2	ENSMUSG00000034023:Fancd2	0.163271	chr6	113531171	113532171
ENSMUSG00000030032	0.554024	2.55654	0.011624	0.129525	Wdr54	ENSMUSG00000030032	Wdr54	ENSMUSG00000030032:Wdr54.4	0.163454	chr6	83155897	83156897
ENSMUSG00000041741	1.39438	5.82013	2.95774e-47	6.82789e-45	Pde3a	ENSMUSG00000041741	Pde3a	ENSMUSG00000041741:Pde3a	0.163619	chr6	141248747	141249747
ENSMUSG00000023367	0.628796	5.6722	1.48413e-09	7.30998e-08	Tmem176a	ENSMUSG00000023367	Tmem176a	ENSMUSG00000023367:Tmem176a.1	0.166285	chr6	48841025	48842025
ENSMUSG00000030032	0.554024	2.55654	0.011624	0.129525	Wdr54	ENSMUSG00000030032	Wdr54	ENSMUSG00000030032:Wdr54.2	0.1706	chr6	83155865	83156865
ENSMUSG00000030032	0.554024	2.55654	0.011624	0.129525	Wdr54	ENSMUSG00000030032	Wdr54	ENSMUSG00000030032:Wdr54.1	0.171	chr6	83155765	83156765
ENSMUSG00000017978	1.44325	4.19119	1.51056e-27	2.35647e-25	Cadps2	ENSMUSG00000017978	Cadps2	ENSMUSG00000017978:Cadps2.3	0.174719	chr6	23838640	23839640
ENSMUSG00000030032	0.554024	2.55654	0.011624	0.129525	Wdr54	ENSMUSG00000030032	Wdr54	ENSMUSG00000030032:Wdr54	0.175674	chr6	83155720	83156720
ENSMUSG00000030199	0.650088	6.41184	4.56303e-13	3.22859e-11	Etv6	ENSMUSG00000030199	Etv6	ENSMUSG00000030199:Etv6	0.176039	chr6	134035178	134036178
ENSMUSG00000073154	2.88569	-3.27958	0.0261628	0.244888	9330158H04Rik	ENSMUSG00000073154	9330158H04Rik	ENSMUSG00000073154:9330158H04Rik.1	0.17665	chr6	36387351	36388351
ENSMUSG00000023505	0.542778	5.97164	8.63675e-09	3.79221e-07	Cdca3	ENSMUSG00000023505	Cdca3	ENSMUSG00000023505:Cdca3.1	0.178416	chr6	124829166	124830166
ENSMUSG00000023505	0.542778	5.97164	8.63675e-09	3.79221e-07	Cdca3	ENSMUSG00000023505	Cdca3	ENSMUSG00000023505:Cdca3	0.18119	chr6	124829025	124830025
ENSMUSG00000030199	0.650088	6.41184	4.56303e-13	3.22859e-11	Etv6	ENSMUSG00000030199	Etv6	ENSMUSG00000030199:Etv6.1	0.183295	chr6	134035447	134036447
ENSMUSG00000017978	1.44325	4.19119	1.51056e-27	2.35647e-25	Cadps2	ENSMUSG00000017978	Cadps2	ENSMUSG00000017978:Cadps2.4	0.198389	chr6	23838725	23839725
ENSMUSG00000017978	1.44325	4.19119	1.51056e-27	2.35647e-25	Cadps2	ENSMUSG00000017978	Cadps2	ENSMUSG00000017978:Cadps2.5	0.200877	chr6	23838763	23839763
ENSMUSG00000004266	1.55899	0.153303	0.00034051	0.00647422	Ptpn6	ENSMUSG00000004266	Ptpn6	ENSMUSG00000004266:Ptpn6.7	0.204098	chr6	124732654	124733654
ENSMUSG00000045613	1.67258	1.03833	1.37526e-06	4.27913e-05	Chrm2	ENSMUSG00000045613	Chrm2	ENSMUSG00000045613:Chrm2.1	0.205091	chr6	36387673	36388673
ENSMUSG00000017978	1.44325	4.19119	1.51056e-27	2.35647e-25	Cadps2	ENSMUSG00000017978	Cadps2	ENSMUSG00000017978:Cadps2.6	0.209209	chr6	23838800	23839800
ENSMUSG00000045613	1.67258	1.03833	1.37526e-06	4.27913e-05	Chrm2	ENSMUSG00000045613	Chrm2	ENSMUSG00000045613:Chrm2	0.210401	chr6	36387562	36388562
ENSMUSG00000002897	0.605488	2.9071	0.0147608	0.156613	Il17ra	ENSMUSG00000002897	Il17ra	ENSMUSG00000002897:Il17ra.1	0.210914	chr6	120473081	120474081
ENSMUSG00000061758	0.716595	4.90721	8.19715e-11	4.80353e-09	Akr1b10	ENSMUSG00000061758	Akr1b10	ENSMUSG00000061758:Akr1b10	0.211864	chr6	34383727	34384727
ENSMUSG00000079523	0.510486	8.21978	2.74518e-10	1.48142e-08	Tmsb10	ENSMUSG00000079523	Tmsb10	ENSMUSG00000079523:Tmsb10.3	0.214131	chr6	72958248	72959248
ENSMUSG00000030319	0.567572	5.1457	1.37655e-08	5.80437e-07	Cand2	ENSMUSG00000030319	Cand2	ENSMUSG00000030319:Cand2	0.215355	chr6	115774016	115775016
ENSMUSG00000073154	2.88569	-3.27958	0.0261628	0.244888	9330158H04Rik	ENSMUSG00000073154	9330158H04Rik	ENSMUSG00000073154:9330158H04Rik.3	0.215358	chr6	36387734	36388734
ENSMUSG00000073154	2.88569	-3.27958	0.0261628	0.244888	9330158H04Rik	ENSMUSG00000073154	9330158H04Rik	ENSMUSG00000073154:9330158H04Rik.2	0.215627	chr6	36387592	36388592
ENSMUSG00000017978	1.44325	4.19119	1.51056e-27	2.35647e-25	Cadps2	ENSMUSG00000017978	Cadps2	ENSMUSG00000017978:Cadps2.7	0.217754	chr6	23838921	23839921
ENSMUSG00000023367	0.628796	5.6722	1.48413e-09	7.30998e-08	Tmem176a	ENSMUSG00000023367	Tmem176a	ENSMUSG00000023367:Tmem176a.2	0.223768	chr6	48841248	48842248
ENSMUSG00000030068	1.05101	-0.345545	0.0232556	0.222922	Gm20696	ENSMUSG00000030068	Gm20696	ENSMUSG00000030068:Gm20696.2	0.227236	chr6	99666297	99667297
ENSMUSG00000093661	1.98335	2.68605	6.39339e-19	6.76456e-17	Eif4e3	ENSMUSG00000093661	Eif4e3	ENSMUSG00000093661:Eif4e3	0.231412	chr6	99666271	99667271
ENSMUSG00000043541	2.15149	-0.674423	4.9822e-05	0.00114551	Dnai7	ENSMUSG00000043541	Casc1	ENSMUSG00000043541:Casc1.5	0.23622	chr6	145210505	145211505
ENSMUSG00000043541	2.15149	-0.674423	4.9822e-05	0.00114551	Dnai7	ENSMUSG00000043541	Casc1	ENSMUSG00000043541:Casc1.4	0.238774	chr6	145210470	145211470
ENSMUSG00000079523	0.510486	8.21978	2.74518e-10	1.48142e-08	Tmsb10	ENSMUSG00000079523	Tmsb10	ENSMUSG00000079523:Tmsb10.2	0.241189	chr6	72957988	72958988
ENSMUSG00000043541	2.15149	-0.674423	4.9822e-05	0.00114551	Dnai7	ENSMUSG00000043541	Casc1	ENSMUSG00000043541:Casc1.3	0.242728	chr6	145210404	145211404
ENSMUSG00000079523	0.510486	8.21978	2.74518e-10	1.48142e-08	Tmsb10	ENSMUSG00000079523	Tmsb10	ENSMUSG00000079523:Tmsb10	0.244424	chr6	72957802	72958802
ENSMUSG00000073154	2.88569	-3.27958	0.0261628	0.244888	9330158H04Rik	ENSMUSG00000073154	9330158H04Rik	ENSMUSG00000073154:9330158H04Rik.4	0.244574	chr6	36387788	36388788
ENSMUSG00000079523	0.510486	8.21978	2.74518e-10	1.48142e-08	Tmsb10	ENSMUSG00000079523	Tmsb10	ENSMUSG00000079523:Tmsb10.1	0.245699	chr6	72957899	72958899
ENSMUSG00000043541	2.15149	-0.674423	4.9822e-05	0.00114551	Dnai7	ENSMUSG00000043541	Casc1	ENSMUSG00000043541:Casc1.2	0.246957	chr6	145210374	145211374
ENSMUSG00000040613	1.10626	2.41093	1.4773e-06	4.55937e-05	Apobec1	ENSMUSG00000040613	Apobec1	ENSMUSG00000040613:Apobec1.5	0.248905	chr6	122601887	122602887
ENSMUSG00000043541	2.15149	-0.674423	4.9822e-05	0.00114551	Dnai7	ENSMUSG00000043541	Casc1	ENSMUSG00000043541:Casc1.1	0.249519	chr6	145210291	145211291
ENSMUSG00000040613	1.10626	2.41093	1.4773e-06	4.55937e-05	Apobec1	ENSMUSG00000040613	Apobec1	ENSMUSG00000040613:Apobec1.4	0.250014	chr6	122601868	122602868
ENSMUSG00000040613	1.10626	2.41093	1.4773e-06	4.55937e-05	Apobec1	ENSMUSG00000040613	Apobec1	ENSMUSG00000040613:Apobec1.6	0.255989	chr6	122601944	122602944
ENSMUSG00000040613	1.10626	2.41093	1.4773e-06	4.55937e-05	Apobec1	ENSMUSG00000040613	Apobec1	ENSMUSG00000040613:Apobec1.3	0.26717	chr6	122601829	122602829
ENSMUSG00000029814	1.24423	3.48754	8.5431e-12	5.37862e-10	Igf2bp3	ENSMUSG00000029814	Igf2bp3	ENSMUSG00000029814:Igf2bp3.2	0.267562	chr6	49213661	49214661
ENSMUSG00000087341	3.79475	-3.6017	0.0367861	0.314003	0610040F04Rik	ENSMUSG00000087341	0610040F04Rik	ENSMUSG00000087341:0610040F04Rik.1	0.267588	chr6	108660434	108661434
ENSMUSG00000042607	2.81218	-0.351376	5.85025e-08	2.27771e-06	Asb4	ENSMUSG00000042607	Asb4	ENSMUSG00000042607:Asb4	0.269461	chr6	5382864	5383864
ENSMUSG00000004266	1.55899	0.153303	0.00034051	0.00647422	Ptpn6	ENSMUSG00000004266	Ptpn6	ENSMUSG00000004266:Ptpn6.6	0.270172	chr6	124732610	124733610
ENSMUSG00000030067	2.61452	5.3123	2.33972e-114	8.91201e-112	Foxp1	ENSMUSG00000030067	Foxp1	ENSMUSG00000030067:Foxp1.17	0.281546	chr6	99520662	99521662
ENSMUSG00000030306	1.39218	3.30603	4.00056e-15	3.23054e-13	Tmtc1	ENSMUSG00000030306	Tmtc1	ENSMUSG00000030306:Tmtc1.1	0.283189	chr6	148443889	148444889
ENSMUSG00000009376	1.02647	0.651763	0.0101956	0.116417	Met	ENSMUSG00000009376	Met	ENSMUSG00000009376:Met	0.29744	chr6	17463291	17464291
ENSMUSG00000030067	2.61452	5.3123	2.33972e-114	8.91201e-112	Foxp1	ENSMUSG00000030067	Foxp1	ENSMUSG00000030067:Foxp1.12	0.305846	chr6	99266015	99267015
ENSMUSG00000030067	2.61452	5.3123	2.33972e-114	8.91201e-112	Foxp1	ENSMUSG00000030067	Foxp1	ENSMUSG00000030067:Foxp1.13	0.305877	chr6	99266032	99267032
ENSMUSG00000002870	0.618341	6.51179	4.68869e-13	3.31032e-11	Mcm2	ENSMUSG00000002870	Mcm2	ENSMUSG00000002870:Mcm2.2	0.307117	chr6	88893227	88894227
ENSMUSG00000046500	2.04335	2.18572	2.85898e-15	2.34611e-13	Tafa4	ENSMUSG00000046500	Fam19a4	ENSMUSG00000046500:Tafa4	0.308294	chr6	97059893	97060893
ENSMUSG00000046500	2.04335	2.18572	2.85898e-15	2.34611e-13	Tafa4	ENSMUSG00000046500	Fam19a4	ENSMUSG00000046500:Tafa4.1	0.310437	chr6	97059913	97060913
ENSMUSG00000030275	0.5182	7.74288	8.27098e-11	4.8344e-09	Etnk1	ENSMUSG00000030275	Etnk1	ENSMUSG00000030275:Etnk1	0.31536	chr6	143166715	143167715
ENSMUSG00000037997	2.53058	6.56927	1.41367e-166	7.10067e-164	Parp11	ENSMUSG00000037997	Parp11	ENSMUSG00000037997:Parp11.2	0.328487	chr6	127453149	127454149
ENSMUSG00000030137	2.06313	-1.15645	0.000862723	0.0146484	Tuba8	ENSMUSG00000030137	Tuba8	ENSMUSG00000030137:Tuba8	0.333807	chr6	121210174	121211174
ENSMUSG00000037997	2.53058	6.56927	1.41367e-166	7.10067e-164	Parp11	ENSMUSG00000037997	Parp11	ENSMUSG00000037997:Parp11.1	0.340474	chr6	127448741	127449741
ENSMUSG00000049409	1.42166	2.19235	9.57712e-08	3.62077e-06	Prokr1	ENSMUSG00000049409	Prokr1	ENSMUSG00000049409:Prokr1.1	0.344959	chr6	87590243	87591243
ENSMUSG00000049409	1.42166	2.19235	9.57712e-08	3.62077e-06	Prokr1	ENSMUSG00000049409	Prokr1	ENSMUSG00000049409:Prokr1	0.353657	chr6	87590220	87591220
ENSMUSG00000001517	0.7129	7.00439	1.42459e-17	1.39135e-15	Foxm1	ENSMUSG00000001517	Foxm1	ENSMUSG00000001517:Foxm1	0.363657	chr6	128362445	128363445
ENSMUSG00000073154	2.88569	-3.27958	0.0261628	0.244888	9330158H04Rik	ENSMUSG00000073154	9330158H04Rik	ENSMUSG00000073154:9330158H04Rik.5	0.367268	chr6	36388417	36389417
ENSMUSG00000073154	2.88569	-3.27958	0.0261628	0.244888	9330158H04Rik	ENSMUSG00000073154	9330158H04Rik	ENSMUSG00000073154:9330158H04Rik.6	0.384663	chr6	36388558	36389558
ENSMUSG00000009376	1.02647	0.651763	0.0101956	0.116417	Met	ENSMUSG00000009376	Met	ENSMUSG00000009376:Met.1	0.385572	chr6	17463516	17464516
ENSMUSG00000029814	1.24423	3.48754	8.5431e-12	5.37862e-10	Igf2bp3	ENSMUSG00000029814	Igf2bp3	ENSMUSG00000029814:Igf2bp3.3	0.391965	chr6	49214204	49215204
ENSMUSG00000038507	3.85651	6.28867	4.18824e-295	2.81524e-292	Parp12	ENSMUSG00000038507	Parp12	ENSMUSG00000038507:Parp12.1	0.396116	chr6	39117849	39118849
ENSMUSG00000029917	5.05977	-0.177874	1.32345e-14	1.03053e-12	Qrfprl	ENSMUSG00000029917	C130060K24Rik	ENSMUSG00000029917:Qrfprl	0.40154	chr6	65380583	65381583
ENSMUSG00000097462	1.29369	-1.03824	0.0307499	0.275916	9530026P05Rik	ENSMUSG00000097462	9530026P05Rik	ENSMUSG00000097462:9530026P05Rik.1	0.404178	chr6	92940058	92941058
ENSMUSG00000097462	1.29369	-1.03824	0.0307499	0.275916	9530026P05Rik	ENSMUSG00000097462	9530026P05Rik	ENSMUSG00000097462:9530026P05Rik	0.409749	chr6	92939827	92940827
ENSMUSG00000029917	5.05977	-0.177874	1.32345e-14	1.03053e-12	Qrfprl	ENSMUSG00000029917	C130060K24Rik	ENSMUSG00000029917:Qrfprl.1	0.415416	chr6	65380772	65381772
ENSMUSG00000029826	3.03085	5.99616	4.70241e-177	2.41503e-174	Zc3hav1	ENSMUSG00000029826	Zc3hav1	ENSMUSG00000029826:Zc3hav1	0.420242	chr6	38353773	38354773
ENSMUSG00000009376	1.02647	0.651763	0.0101956	0.116417	Met	ENSMUSG00000009376	Met	ENSMUSG00000009376:Met.2	0.431563	chr6	17463585	17464585
ENSMUSG00000029814	1.24423	3.48754	8.5431e-12	5.37862e-10	Igf2bp3	ENSMUSG00000029814	Igf2bp3	ENSMUSG00000029814:Igf2bp3.4	0.442317	chr6	49214457	49215457
ENSMUSG00000030067	2.61452	5.3123	2.33972e-114	8.91201e-112	Foxp1	ENSMUSG00000030067	Foxp1	ENSMUSG00000030067:Foxp1.4	0.442813	chr6	99027762	99028762
ENSMUSG00000030341	0.976479	6.25845	7.27736e-29	1.19224e-26	Tnfrsf1a	ENSMUSG00000030341	Tnfrsf1a	ENSMUSG00000030341:Tnfrsf1a.2	0.44792	chr6	125349201	125350201
ENSMUSG00000030341	0.976479	6.25845	7.27736e-29	1.19224e-26	Tnfrsf1a	ENSMUSG00000030341	Tnfrsf1a	ENSMUSG00000030341:Tnfrsf1a	0.448374	chr6	125348840	125349840
ENSMUSG00000073144	1.7729	-2.54171	0.0449705	0.362205	4930599N23Rik	ENSMUSG00000073144	4930599N23Rik	ENSMUSG00000073144:4930599N23Rik	0.450896	chr6	39117951	39118951
ENSMUSG00000030341	0.976479	6.25845	7.27736e-29	1.19224e-26	Tnfrsf1a	ENSMUSG00000030341	Tnfrsf1a	ENSMUSG00000030341:Tnfrsf1a.1	0.451811	chr6	125348929	125349929
ENSMUSG00000030067	2.61452	5.3123	2.33972e-114	8.91201e-112	Foxp1	ENSMUSG00000030067	Foxp1	ENSMUSG00000030067:Foxp1.3	0.45275	chr6	99027491	99028491
ENSMUSG00000030067	2.61452	5.3123	2.33972e-114	8.91201e-112	Foxp1	ENSMUSG00000030067	Foxp1	ENSMUSG00000030067:Foxp1.5	0.458731	chr6	99027813	99028813
ENSMUSG00000030231	0.611682	4.26751	2.08157e-06	6.21452e-05	Plekha5	ENSMUSG00000030231	Plekha5	ENSMUSG00000030231:Plekha5.4	0.471701	chr6	140524343	140525343
ENSMUSG00000004446	1.7415	2.86437	4.05686e-17	3.81545e-15	Bid	ENSMUSG00000004446	Bid	ENSMUSG00000004446:Bid.1	0.485292	chr6	120916301	120917301
ENSMUSG00000052353	0.900339	1.78062	0.00122792	0.0198465	Cemip	ENSMUSG00000052353	Cemip	ENSMUSG00000052353:Cemip.2	0.000311365	chr7	84086002	84087002
ENSMUSG00000060601	0.739659	5.34677	3.29335e-14	2.50054e-12	Nr1h2	ENSMUSG00000060601	Nr1h2	ENSMUSG00000060601:Nr1h2.6	0.00143827	chr7	44553208	44554208
ENSMUSG00000060601	0.739659	5.34677	3.29335e-14	2.50054e-12	Nr1h2	ENSMUSG00000060601	Nr1h2	ENSMUSG00000060601:Nr1h2.8	0.0017269	chr7	44553423	44554423
ENSMUSG00000043456	0.849817	3.54029	1.76454e-07	6.38082e-06	Zfp536	ENSMUSG00000043456	Zfp536	ENSMUSG00000043456:Zfp536.2	0.00180311	chr7	37769124	37770124
ENSMUSG00000030493	0.581259	3.06797	0.00189197	0.0287112	Faap24	ENSMUSG00000030493	Faap24	ENSMUSG00000030493:Faap24.1	0.00254521	chr7	35396336	35397336
ENSMUSG00000060601	0.739659	5.34677	3.29335e-14	2.50054e-12	Nr1h2	ENSMUSG00000060601	Nr1h2	ENSMUSG00000060601:Nr1h2.7	0.00403084	chr7	44553403	44554403
ENSMUSG00000060601	0.739659	5.34677	3.29335e-14	2.50054e-12	Nr1h2	ENSMUSG00000060601	Nr1h2	ENSMUSG00000060601:Nr1h2.5	0.0054135	chr7	44553189	44554189
[truncated: 547 more rows]

## Sheet: Enhancer_windows_selected
"logFC" RNA IFN-g 24h (+0h) vs. Ctrl	"logCPM" RNA IFN-g 24h (+0h) vs. Ctrl	"PValue" RNA IFN-g 24h (+0h) vs. Ctrl	"FDR" RNA IFN-g 24h (+0h) vs. Ctrl	GeneSymbol	ENS_102		Enh_region	ATAC_logFC	RNA_llfc_2nd_dose	RNA_FDR_2nd_dose	Enh_region_chr	Enh_region_start	Enh_region_end
13.0615	6.1156	0	0	Cd74	ENSMUSG00000024610	Cd74	EM10E0662367_enhD;EM10E0662368_enhD:Cd74	0.20417	-0.988628	2.51977e-05	chr18	60766687	60767687	EM10E0662367_enhD;EM10E0662368_enhD:Cd74.1
13.0615	6.1156	0	0	Cd74	ENSMUSG00000024610	Cd74	EM10E0662382_enhD:Cd74	0.263459	-0.988628	2.51977e-05	chr18	60787936	60788936	EM10E0662382_enhD:Cd74.2
13.0615	6.1156	0	0	Cd74	ENSMUSG00000024610	Cd74	EM10E0662421_enhD;EM10E0662422_enhD:Cd74	0.218659	-0.988628	2.51977e-05	chr18	60830304	60831304	EM10E0662421_enhD;EM10E0662422_enhD:Cd74.3
1.88886	0.922568	3.25823e-06	9.34886e-05	Klk8	ENSMUSG00000064023	Klk8	EM10E0847614_enhD:Klk8	0.0862452	-1.89276	6.51307e-05	chr7	43787796	43788796	EM10E0847614_enhD:Klk8.1
4.52773	6.00891	0	0	Tvp23a	ENSMUSG00000050908	Tvp23a	EM10E0615406_enhD;EM10E0615407_enhD:Tvp23a	0.337115	-0.951652	0.000174926	chr16	10451782	10452782	EM10E0615406_enhD;EM10E0615407_enhD:Tvp23a.1
0.874076	3.62708	1.54635e-07	5.66805e-06	Ptgds	ENSMUSG00000015090	Ptgds	EM10E0688337_enhP:Ptgds	0.0688664	-1.66714	0.000275675	chr2	25421651	25422651	EM10E0688337_enhP:Ptgds.3
0.874076	3.62708	1.54635e-07	5.66805e-06	Ptgds	ENSMUSG00000015090	Ptgds	EM10E0688343_enhD;EM10E0688344_enhP;EM10E0688345_enhP:Ptgds	0.197798	-1.66714	0.000275675	chr2	25426328	25427328	EM10E0688343_enhD;EM10E0688344_enhP;EM10E0688345_enhP:Ptgds.2
0.874076	3.62708	1.54635e-07	5.66805e-06	Ptgds	ENSMUSG00000015090	Ptgds	EM10E0688351_enhD;EM10E0688352_enhD:Ptgds	0.364159	-1.66714	0.000275675	chr2	25430485	25431485	EM10E0688351_enhD;EM10E0688352_enhD:Ptgds.1
0.874076	3.62708	1.54635e-07	5.66805e-06	Ptgds	ENSMUSG00000015090	Ptgds	EM10E0688359_enhD:Ptgds	0.043287	-1.66714	0.000275675	chr2	25458585	25459585	EM10E0688359_enhD:Ptgds.5
0.874076	3.62708	1.54635e-07	5.66805e-06	Ptgds	ENSMUSG00000015090	Ptgds	EM10E0688373_enhD:Ptgds	0.385769	-1.66714	0.000275675	chr2	25477943	25478943	EM10E0688373_enhD:Ptgds.4
0.874076	3.62708	1.54635e-07	5.66805e-06	Ptgds	ENSMUSG00000015090	Ptgds	EM10E0688377_enhD:Ptgds	0.236376	-1.66714	0.000275675	chr2	25482660	25483660	EM10E0688377_enhD:Ptgds.6
1.98011	4.74459	1.8182e-60	5.06746e-58	Syt4	ENSMUSG00000024261	Syt4	EM10E0656128_enhP:Syt4	0.166946	-1.22682	0.000308253	chr18	31446061	31447061	EM10E0656128_enhP:Syt4.1
7.72282	4.94163	1.19072e-43	2.62926e-41	Bst2	ENSMUSG00000046718	Bst2	EM10E0880681_enhD:Bst2	0.405445	-0.905018	0.000487977	chr8	71496148	71497148	EM10E0880681_enhD:Bst2.2
7.72282	4.94163	1.19072e-43	2.62926e-41	Bst2	ENSMUSG00000046718	Bst2	EM10E0880688_enhD:Bst2	0.11412	-0.905018	0.000487977	chr8	71507247	71508247	EM10E0880688_enhD:Bst2.3
7.72282	4.94163	1.19072e-43	2.62926e-41	Bst2	ENSMUSG00000046718	Bst2	EM10E0880705_enhP;EM10E0880707_enhP;EM10E0880708_enhP:Bst2	0.329067	-0.905018	0.000487977	chr8	71526569	71527569	EM10E0880705_enhP;EM10E0880707_enhP;EM10E0880708_enhP:Bst2.5
7.72282	4.94163	1.19072e-43	2.62926e-41	Bst2	ENSMUSG00000046718	Bst2	EM10E0880730_enhP:Bst2	0.17346	-0.905018	0.000487977	chr8	71558984	71559984	EM10E0880730_enhP:Bst2.6
7.72282	4.94163	1.19072e-43	2.62926e-41	Bst2	ENSMUSG00000046718	Bst2	EM10E0880733_enhD:Bst2	0.102298	-0.905018	0.000487977	chr8	71562516	71563516	EM10E0880733_enhD:Bst2.4
7.72282	4.94163	1.19072e-43	2.62926e-41	Bst2	ENSMUSG00000046718	Bst2	EM10E0880743_enhD:Bst2	0.103767	-0.905018	0.000487977	chr8	71572482	71573482	EM10E0880743_enhD:Bst2.1
8.76912	4.07326	5.85967e-227	3.43376e-224	H2-DMb1	ENSMUSG00000079547	H2-DMb1	EM10E0639930_enhD;EM10E0639931_enhD:H2-DMb1	0.0490324	-0.852113	0.00246634	chr17	34127560	34128560	EM10E0639930_enhD;EM10E0639931_enhD:H2-DMb1.3
8.76912	4.07326	5.85967e-227	3.43376e-224	H2-DMb1	ENSMUSG00000079547	H2-DMb1	EM10E0639930_enhD;EM10E0639931_enhD:H2-DMb1	0.0490324	-0.852113	0.00246634	chr17	34127560	34128560	EM10E0639930_enhD;EM10E0639931_enhD:H2-DMb1.3
8.76912	4.07326	5.85967e-227	3.43376e-224	H2-DMb1	ENSMUSG00000079547	H2-DMb1	EM10E0639955_enhD;EM10E0639956_enhD:H2-DMb1	0.0452463	-0.852113	0.00246634	chr17	34164471	34165471	EM10E0639955_enhD;EM10E0639956_enhD:H2-DMb1.1
8.76912	4.07326	5.85967e-227	3.43376e-224	H2-DMb1	ENSMUSG00000079547	H2-DMb1	EM10E0639959_enhD;EM10E0639960_enhD:H2-DMb1	0.400236	-0.852113	0.00246634	chr17	34170635	34171635	EM10E0639959_enhD;EM10E0639960_enhD:H2-DMb1.2
1.84062	2.86357	7.36471e-17	6.81429e-15	Nkx6-2	ENSMUSG00000041309	Nkx6-2	EM10E0867845_enhD;EM10E0867846_enhD:Nkx6-2	0.19322	-1.19449	0.0114806	chr7	139544844	139545844	EM10E0867845_enhD;EM10E0867846_enhD:Nkx6-2.1
0.605648	7.67763	0.00860096	0.101591	Fabp5	ENSMUSG00000027533	Fabp5	EM10E0724279_enhD;EM10E0724280_enhD:Fabp5	0.171826	-0.682236	0.0515097	chr3	9968070	9969070	EM10E0724279_enhD;EM10E0724280_enhD:Fabp5.3
0.605648	7.67763	0.00860096	0.101591	Fabp5	ENSMUSG00000027533	Fabp5	EM10E0724282_enhD;EM10E0724283_enhD;EM10E0724284_enhD:Fabp5	0.0808104	-0.682236	0.0515097	chr3	9974098	9975098	EM10E0724282_enhD;EM10E0724283_enhD;EM10E0724284_enhD:Fabp5.4
0.605648	7.67763	0.00860096	0.101591	Fabp5	ENSMUSG00000027533	Fabp5	EM10E0724295_enhP;EM10E0724296_enhP:Fabp5	0.0697061	-0.682236	0.0515097	chr3	10013244	10014244	EM10E0724295_enhP;EM10E0724296_enhP:Fabp5.2
0.605648	7.67763	0.00860096	0.101591	Fabp5	ENSMUSG00000027533	Fabp5	EM10E0724302_enhD:Fabp5	0.0839099	-0.682236	0.0515097	chr3	10022126	10023126	EM10E0724302_enhD:Fabp5.1
0.571353	3.25983	0.00280513	0.0398932	Cryab	ENSMUSG00000032060	Cryab	EM10E0904789_enhP:Cryab	0.178741	-0.930963	0.0577746	chr9	50726719	50727719	EM10E0904789_enhP:Cryab.3
0.571353	3.25983	0.00280513	0.0398932	Cryab	ENSMUSG00000032060	Cryab	EM10E0904793_enhP:Cryab	0.385027	-0.930963	0.0577746	chr9	50729281	50730281	EM10E0904793_enhP:Cryab.1
0.571353	3.25983	0.00280513	0.0398932	Cryab	ENSMUSG00000032060	Cryab	EM10E0904824_enhP:Cryab	0.19493	-0.930963	0.0577746	chr9	50768764	50769764	EM10E0904824_enhP:Cryab.4
0.571353	3.25983	0.00280513	0.0398932	Cryab	ENSMUSG00000032060	Cryab	EM10E0904841_enhD:Cryab	0.0373029	-0.930963	0.0577746	chr9	50800685	50801685	EM10E0904841_enhD:Cryab.2
0.514614	4.14771	0.00924372	0.107756	Myo7a	ENSMUSG00000030761	Myo7a	EM10E0857239_enhD:Myo7a	0.0370197	-0.83846	0.0577746	chr7	98103547	98104547	EM10E0857239_enhD:Myo7a.4
0.514614	4.14771	0.00924372	0.107756	Myo7a	ENSMUSG00000030761	Myo7a	EM10E0857250_enhD;EM10E0857251_enhD:Myo7a	0.212243	-0.83846	0.0577746	chr7	98116828	98117828	EM10E0857250_enhD;EM10E0857251_enhD:Myo7a.3
0.514614	4.14771	0.00924372	0.107756	Myo7a	ENSMUSG00000030761	Myo7a	EM10E0857263_enhD:Myo7a	0.00703265	-0.83846	0.0577746	chr7	98140336	98141336	EM10E0857263_enhD:Myo7a.2
0.514614	4.14771	0.00924372	0.107756	Myo7a	ENSMUSG00000030761	Myo7a	EM10E0857275_enhD;EM10E0857276_enhD;EM10E0857277_enhD:Myo7a	0.148462	-0.83846	0.0577746	chr7	98155558	98156558	EM10E0857275_enhD;EM10E0857276_enhD;EM10E0857277_enhD:Myo7a.1
1.12024	4.93316	0.00052744	0.00949516	Col20a1	ENSMUSG00000016356	Col20a1	EM10E0723206_enhD:Col20a1	0.011835	-1.15855	0.0765684	chr2	180963670	180964670	EM10E0723206_enhD:Col20a1.1
1.12024	4.93316	0.00052744	0.00949516	Col20a1	ENSMUSG00000016356	Col20a1	EM10E0723207_enhP;EM10E0723208_enhP:Col20a1	0.282104	-1.15855	0.0765684	chr2	180965895	180966895	EM10E0723207_enhP;EM10E0723208_enhP:Col20a1.2
8.20634	7.00431	0	0	H2-Ab1	ENSMUSG00000073421	H2-Ab1	EM10E0640018_enhP;EM10E0640019_enhP;EM10E0640020_enhP;EM10E0640021_enhP:H2-Ab1	0.130127	-0.657489	0.0765684	chr17	34264202	34265202	EM10E0640018_enhP;EM10E0640019_enhP;EM10E0640020_enhP;EM10E0640021_enhP:H2-Ab1.1
8.20634	7.00431	0	0	H2-Ab1	ENSMUSG00000073421	H2-Ab1	EM10E0640072_enhD:H2-Ab1	0.0598372	-0.657489	0.0765684	chr17	34313126	34314126	EM10E0640072_enhD:H2-Ab1.2
3.80819	5.36603	2.37138e-232	1.4262e-229	Slc12a7	ENSMUSG00000017756	Slc12a7	EM10E0565858_enhD:Slc12a7	0.0485855	-0.690126	0.104163	chr13	73722830	73723830	EM10E0565858_enhD:Slc12a7.1
3.80819	5.36603	2.37138e-232	1.4262e-229	Slc12a7	ENSMUSG00000017756	Slc12a7	EM10E0565861_enhD;EM10E0565862_enhD:Slc12a7	0.350941	-0.690126	0.104163	chr13	73727295	73728295	EM10E0565861_enhD;EM10E0565862_enhD:Slc12a7.2
0.580883	6.10409	6.51201e-09	2.92337e-07	Lgmn	ENSMUSG00000021190	Lgmn	EM10E0546350_enhD;EM10E0546351_enhD:Lgmn	0.384173	-0.638727	0.145686	chr12	102396133	102397133	EM10E0546350_enhD;EM10E0546351_enhD:Lgmn.2
0.580883	6.10409	6.51201e-09	2.92337e-07	Lgmn	ENSMUSG00000021190	Lgmn	EM10E0546355_enhD:Lgmn	0.331636	-0.638727	0.145686	chr12	102416089	102417089	EM10E0546355_enhD:Lgmn.3
0.580883	6.10409	6.51201e-09	2.92337e-07	Lgmn	ENSMUSG00000021190	Lgmn	EM10E0546358_enhD;EM10E0546359_enhD;EM10E0546360_enhD;EM10E0546361_enhD:Lgmn	0.337653	-0.638727	0.145686	chr12	102419416	102420416	EM10E0546358_enhD;EM10E0546359_enhD;EM10E0546360_enhD;EM10E0546361_enhD:Lgmn.1
0.580883	6.10409	6.51201e-09	2.92337e-07	Lgmn	ENSMUSG00000021190	Lgmn	EM10E0546386_enhD;EM10E0546387_enhD:Lgmn	0.296714	-0.638727	0.145686	chr12	102450500	102451500	EM10E0546386_enhD;EM10E0546387_enhD:Lgmn.5
0.580883	6.10409	6.51201e-09	2.92337e-07	Lgmn	ENSMUSG00000021190	Lgmn	EM10E0546386_enhD;EM10E0546387_enhD:Lgmn	0.296714	-0.638727	0.145686	chr12	102450500	102451500	EM10E0546386_enhD;EM10E0546387_enhD:Lgmn.5
0.580883	6.10409	6.51201e-09	2.92337e-07	Lgmn	ENSMUSG00000021190	Lgmn	EM10E0546400_enhP:Lgmn	0.00499319	-0.638727	0.145686	chr12	102469466	102470466	EM10E0546400_enhP:Lgmn.4
0.992611	6.30064	1.1352e-29	1.93612e-27	Capn5	ENSMUSG00000035547	Capn5	EM10E0857263_enhD:Capn5	0.00703265	-0.857838	0.217525	chr7	98140336	98141336	EM10E0857263_enhD:Capn5.5
0.992611	6.30064	1.1352e-29	1.93612e-27	Capn5	ENSMUSG00000035547	Capn5	EM10E0857275_enhD;EM10E0857276_enhD;EM10E0857277_enhD:Capn5	0.148462	-0.857838	0.217525	chr7	98155558	98156558	EM10E0857275_enhD;EM10E0857276_enhD;EM10E0857277_enhD:Capn5.3
0.992611	6.30064	1.1352e-29	1.93612e-27	Capn5	ENSMUSG00000035547	Capn5	EM10E0857301_enhP:Capn5	0.0330099	-0.857838	0.217525	chr7	98178482	98179482	EM10E0857301_enhP:Capn5.4
0.992611	6.30064	1.1352e-29	1.93612e-27	Capn5	ENSMUSG00000035547	Capn5	EM10E0857303_enhD:Capn5	0.344595	-0.857838	0.217525	chr7	98184988	98185988	EM10E0857303_enhD:Capn5.2
0.992611	6.30064	1.1352e-29	1.93612e-27	Capn5	ENSMUSG00000035547	Capn5	EM10E0857304_enhD:Capn5	0.0264153	-0.857838	0.217525	chr7	98186409	98187409	EM10E0857304_enhD:Capn5.1
11.4425	6.48574	0	0	H2-Aa	ENSMUSG00000036594	H2-Aa	EM10E0640018_enhP;EM10E0640019_enhP;EM10E0640020_enhP;EM10E0640021_enhP:H2-Aa	0.130127	-0.557356	0.278584	chr17	34264202	34265202	EM10E0640018_enhP;EM10E0640019_enhP;EM10E0640020_enhP;EM10E0640021_enhP:H2-Aa.1
11.4425	6.48574	0	0	H2-Aa	ENSMUSG00000036594	H2-Aa	EM10E0640072_enhD:H2-Aa	0.0598372	-0.557356	0.278584	chr17	34313126	34314126	EM10E0640072_enhD:H2-Aa.2
11.4425	6.48574	0	0	H2-Aa	ENSMUSG00000036594	H2-Aa	EM10E0640077_enhD:H2-Aa	0.164337	-0.557356	0.278584	chr17	34330910	34331910	EM10E0640077_enhD:H2-Aa.3
3.29977	5.48378	1.55328e-44	3.49741e-42	Ifitm3	ENSMUSG00000025492	Ifitm3	EM10E0868217_enhD;EM10E0868218_enhP:Ifitm3	0.311332	-0.664412	0.304794	chr7	141008361	141009361	EM10E0868217_enhD;EM10E0868218_enhP:Ifitm3.3
3.29977	5.48378	1.55328e-44	3.49741e-42	Ifitm3	ENSMUSG00000025492	Ifitm3	EM10E0868225_enhD;EM10E0868226_enhD;EM10E0868227_enhD;EM10E0868228_enhD;EM10E0868229_enhD:Ifitm3	0.298178	-0.664412	0.304794	chr7	141025409	141026409	EM10E0868225_enhD;EM10E0868226_enhD;EM10E0868227_enhD;EM10E0868228_enhD;EM10E0868229_enhD:Ifitm3.5
3.29977	5.48378	1.55328e-44	3.49741e-42	Ifitm3	ENSMUSG00000025492	Ifitm3	EM10E0868234_enhD;EM10E0868235_enhD;EM10E0868236_enhD:Ifitm3	0.134929	-0.664412	0.304794	chr7	141040992	141041992	EM10E0868234_enhD;EM10E0868235_enhD;EM10E0868236_enhD:Ifitm3.2
3.29977	5.48378	1.55328e-44	3.49741e-42	Ifitm3	ENSMUSG00000025492	Ifitm3	EM10E0868239_enhD;EM10E0868240_enhD;EM10E0868241_enhD;EM10E0868242_enhD;EM10E0868243_enhD;EM10E0868244_enhD:Ifitm3	0.0216013	-0.664412	0.304794	chr7	141047792	141048792	EM10E0868239_enhD;EM10E0868240_enhD;EM10E0868241_enhD;EM10E0868242_enhD;EM10E0868243_enhD;EM10E0868244_enhD:Ifitm3.1
3.29977	5.48378	1.55328e-44	3.49741e-42	Ifitm3	ENSMUSG00000025492	Ifitm3	EM10E0868253_enhP:Ifitm3	0.0946636	-0.664412	0.304794	chr7	141059747	141060747	EM10E0868253_enhP:Ifitm3.4
2.00648	0.444742	2.06537e-06	6.17828e-05	Flt4	ENSMUSG00000020357	Flt4	EM10E0501252_enhP:Flt4	0.315549	-1.55858	0.3276	chr11	49609776	49610776	EM10E0501252_enhP:Flt4.2
2.00648	0.444742	2.06537e-06	6.17828e-05	Flt4	ENSMUSG00000020357	Flt4	EM10E0501261_enhD;EM10E0501262_enhD;EM10E0501263_enhD:Flt4	0.266969	-1.55858	0.3276	chr11	49650342	49651342	EM10E0501261_enhD;EM10E0501262_enhD;EM10E0501263_enhD:Flt4.3
2.00648	0.444742	2.06537e-06	6.17828e-05	Flt4	ENSMUSG00000020357	Flt4	EM10E0501266_enhD;EM10E0501267_enhD;EM10E0501268_enhD:Flt4	0.401816	-1.55858	0.3276	chr11	49652376	49653376	EM10E0501266_enhD;EM10E0501267_enhD;EM10E0501268_enhD:Flt4.1
0.934494	4.81856	2.27053e-09	1.09822e-07	Clu	ENSMUSG00000022037	Clu	EM10E0585434_enhD:Clu	0.475717	-0.563289	0.349075	chr14	65922337	65923337	EM10E0585434_enhD:Clu.1
0.934494	4.81856	2.27053e-09	1.09822e-07	Clu	ENSMUSG00000022037	Clu	EM10E0585440_enhP:Clu	0.00869983	-0.563289	0.349075	chr14	65952566	65953566	EM10E0585440_enhP:Clu.3
0.934494	4.81856	2.27053e-09	1.09822e-07	Clu	ENSMUSG00000022037	Clu	EM10E0585457_enhD:Clu	0.0105409	-0.563289	0.349075	chr14	65981833	65982833	EM10E0585457_enhD:Clu.2
7.96386	1.75348	3.11686e-52	7.74269e-50	Tnfrsf14	ENSMUSG00000042333	Tnfrsf14	EM10E0779926_enhD:Tnfrsf14	0.445015	-0.839656	0.396291	chr4	154880494	154881494	EM10E0779926_enhD:Tnfrsf14.9
7.96386	1.75348	3.11686e-52	7.74269e-50	Tnfrsf14	ENSMUSG00000042333	Tnfrsf14	EM10E0779929_enhD;EM10E0779930_enhD:Tnfrsf14	0.0454811	-0.839656	0.396291	chr4	154886690	154887690	EM10E0779929_enhD;EM10E0779930_enhD:Tnfrsf14.11
7.96386	1.75348	3.11686e-52	7.74269e-50	Tnfrsf14	ENSMUSG00000042333	Tnfrsf14	EM10E0779933_enhP;EM10E0779934_enhP:Tnfrsf14	0.0117984	-0.839656	0.396291	chr4	154897687	154898687	EM10E0779933_enhP;EM10E0779934_enhP:Tnfrsf14.10
7.96386	1.75348	3.11686e-52	7.74269e-50	Tnfrsf14	ENSMUSG00000042333	Tnfrsf14	EM10E0779937_enhP:Tnfrsf14	0.0110062	-0.839656	0.396291	chr4	154899343	154900343	EM10E0779937_enhP:Tnfrsf14.8
7.96386	1.75348	3.11686e-52	7.74269e-50	Tnfrsf14	ENSMUSG00000042333	Tnfrsf14	EM10E0779938_enhD;EM10E0779939_enhD:Tnfrsf14	0.0836533	-0.839656	0.396291	chr4	154904360	154905360	EM10E0779938_enhD;EM10E0779939_enhD:Tnfrsf14.12
7.96386	1.75348	3.11686e-52	7.74269e-50	Tnfrsf14	ENSMUSG00000042333	Tnfrsf14	EM10E0779941_enhD:Tnfrsf14	0.0313987	-0.839656	0.396291	chr4	154907415	154908415	EM10E0779941_enhD:Tnfrsf14.7
7.96386	1.75348	3.11686e-52	7.74269e-50	Tnfrsf14	ENSMUSG00000042333	Tnfrsf14	EM10E0779974_enhD;EM10E0779975_enhD:Tnfrsf14	0.0357005	-0.839656	0.396291	chr4	154943682	154944682	EM10E0779974_enhD;EM10E0779975_enhD:Tnfrsf14.4
7.96386	1.75348	3.11686e-52	7.74269e-50	Tnfrsf14	ENSMUSG00000042333	Tnfrsf14	EM10E0779976_enhD;EM10E0779977_enhD:Tnfrsf14	0.469534	-0.839656	0.396291	chr4	154946199	154947199	EM10E0779976_enhD;EM10E0779977_enhD:Tnfrsf14.6
7.96386	1.75348	3.11686e-52	7.74269e-50	Tnfrsf14	ENSMUSG00000042333	Tnfrsf14	EM10E0779978_enhD;EM10E0779979_enhD;EM10E0779980_enhD:Tnfrsf14	0.372717	-0.839656	0.396291	chr4	154948328	154949328	EM10E0779978_enhD;EM10E0779979_enhD;EM10E0779980_enhD:Tnfrsf14.3
7.96386	1.75348	3.11686e-52	7.74269e-50	Tnfrsf14	ENSMUSG00000042333	Tnfrsf14	EM10E0779985_enhD;EM10E0779986_enhD;EM10E0779987_enhD:Tnfrsf14	0.040677	-0.839656	0.396291	chr4	154957767	154958767	EM10E0779985_enhD;EM10E0779986_enhD;EM10E0779987_enhD:Tnfrsf14.5
7.96386	1.75348	3.11686e-52	7.74269e-50	Tnfrsf14	ENSMUSG00000042333	Tnfrsf14	EM10E0779989_enhP:Tnfrsf14	0.145465	-0.839656	0.396291	chr4	154959802	154960802	EM10E0779989_enhP:Tnfrsf14.1
7.96386	1.75348	3.11686e-52	7.74269e-50	Tnfrsf14	ENSMUSG00000042333	Tnfrsf14	EM10E0780001_enhP;EM10E0780002_enhP:Tnfrsf14	0.138229	-0.839656	0.396291	chr4	154964388	154965388	EM10E0780001_enhP;EM10E0780002_enhP:Tnfrsf14.2
4.01165	5.18252	1.11768e-88	3.84112e-86	Il18bp	ENSMUSG00000070427	Il18bp	EM10E0859075_enhP:Il18bp	0.0476923	-0.528386	0.397292	chr7	101970805	101971805	EM10E0859075_enhP:Il18bp.1
4.01165	5.18252	1.11768e-88	3.84112e-86	Il18bp	ENSMUSG00000070427	Il18bp	EM10E0859092_enhD;EM10E0859093_enhD:Il18bp	0.152015	-0.528386	0.397292	chr7	102025243	102026243	EM10E0859092_enhD;EM10E0859093_enhD:Il18bp.3
4.01165	5.18252	1.11768e-88	3.84112e-86	Il18bp	ENSMUSG00000070427	Il18bp	EM10E0859094_enhD;EM10E0859095_enhD:Il18bp	0.162569	-0.528386	0.397292	chr7	102031843	102032843	EM10E0859094_enhD;EM10E0859095_enhD:Il18bp.2
5.90537	9.55236	0	0	B2m	ENSMUSG00000060802	B2m	EM10E0708060_enhP;EM10E0708061_enhP;EM10E0708062_enhP:B2m	0.224235	-0.538734	0.495489	chr2	122148464	122149464	EM10E0708060_enhP;EM10E0708061_enhP;EM10E0708062_enhP:B2m.1
5.00431	5.63023	0	0	H2-DMa	ENSMUSG00000037649	H2-DMa	EM10E0639900_enhD;EM10E0639901_enhD:H2-DMa	0.294034	-0.500945	0.521447	chr17	34101304	34102304	EM10E0639900_enhD;EM10E0639901_enhD:H2-DMa.1
5.00431	5.63023	0	0	H2-DMa	ENSMUSG00000037649	H2-DMa	EM10E0639930_enhD;EM10E0639931_enhD:H2-DMa	0.0490324	-0.500945	0.521447	chr17	34127560	34128560	EM10E0639930_enhD;EM10E0639931_enhD:H2-DMa.4
5.00431	5.63023	0	0	H2-DMa	ENSMUSG00000037649	H2-DMa	EM10E0639930_enhD;EM10E0639931_enhD:H2-DMa	0.0490324	-0.500945	0.521447	chr17	34127560	34128560	EM10E0639930_enhD;EM10E0639931_enhD:H2-DMa.4
5.00431	5.63023	0	0	H2-DMa	ENSMUSG00000037649	H2-DMa	EM10E0639955_enhD;EM10E0639956_enhD:H2-DMa	0.0452463	-0.500945	0.521447	chr17	34164471	34165471	EM10E0639955_enhD;EM10E0639956_enhD:H2-DMa.2
5.00431	5.63023	0	0	H2-DMa	ENSMUSG00000037649	H2-DMa	EM10E0639959_enhD;EM10E0639960_enhD:H2-DMa	0.400236	-0.500945	0.521447	chr17	34170635	34171635	EM10E0639959_enhD;EM10E0639960_enhD:H2-DMa.3
5.35617	0.548788	9.59696e-22	1.19201e-19	Htr5b	ENSMUSG00000050534	Htr5b	EM10E0448692_enhD;EM10E0448693_enhD;EM10E0448694_enhD:Htr5b	0.275569	-1.08947	0.523431	chr1	121476943	121477943	EM10E0448692_enhD;EM10E0448693_enhD;EM10E0448694_enhD:Htr5b.1
1.61531	5.96882	5.18084e-68	1.52778e-65	Phactr1	ENSMUSG00000054728	Phactr1	EM10E0557991_enhD:Phactr1	0.0863047	-0.489295	0.617718	chr13	42656729	42657729	EM10E0557991_enhD:Phactr1.2
1.61531	5.96882	5.18084e-68	1.52778e-65	Phactr1	ENSMUSG00000054728	Phactr1	EM10E0558002_enhP:Phactr1	0.430421	-0.489295	0.617718	chr13	42709769	42710769	EM10E0558002_enhP:Phactr1.1
1.61531	5.96882	5.18084e-68	1.52778e-65	Phactr1	ENSMUSG00000054728	Phactr1	EM10E0558008_enhD:Phactr1	0.350546	-0.489295	0.617718	chr13	42725438	42726438	EM10E0558008_enhD:Phactr1.3
2.32963	5.29431	8.1679e-09	3.60365e-07	Sfrp1	ENSMUSG00000031548	Sfrp1	EM10E0873215_enhD:Sfrp1	0.435569	-0.48649	0.660155	chr8	23379450	23380450	EM10E0873215_enhD:Sfrp1.1
2.32963	5.29431	8.1679e-09	3.60365e-07	Sfrp1	ENSMUSG00000031548	Sfrp1	EM10E0873230_enhP:Sfrp1	0.0236107	-0.48649	0.660155	chr8	23410114	23411114	EM10E0873230_enhP:Sfrp1.4
2.32963	5.29431	8.1679e-09	3.60365e-07	Sfrp1	ENSMUSG00000031548	Sfrp1	EM10E0873235_enhP:Sfrp1	0.168366	-0.48649	0.660155	chr8	23411863	23412863	EM10E0873235_enhP:Sfrp1.2
2.32963	5.29431	8.1679e-09	3.60365e-07	Sfrp1	ENSMUSG00000031548	Sfrp1	EM10E0873237_enhD:Sfrp1	0.270733	-0.48649	0.660155	chr8	23420112	23421112	EM10E0873237_enhD:Sfrp1.3
2.32963	5.29431	8.1679e-09	3.60365e-07	Sfrp1	ENSMUSG00000031548	Sfrp1	EM10E0873240_enhD;EM10E0873241_enhD;EM10E0873242_enhD:Sfrp1	0.35478	-0.48649	0.660155	chr8	23424643	23425643	EM10E0873240_enhD;EM10E0873241_enhD;EM10E0873242_enhD:Sfrp1.5
5.76783	3.63639	2.22373e-126	8.76228e-124	Icam1	ENSMUSG00000037405	Icam1	EM10E0897626_enhD;EM10E0897627_enhD;EM10E0897628_enhD;EM10E0897629_enhD:Icam1	0.000101412	-0.599689	0.667285	chr9	20972045	20973045	EM10E0897626_enhD;EM10E0897627_enhD;EM10E0897628_enhD;EM10E0897629_enhD:Icam1.1
5.76783	3.63639	2.22373e-126	8.76228e-124	Icam1	ENSMUSG00000037405	Icam1	EM10E0897631_enhP;EM10E0897632_enhP:Icam1	0.126933	-0.599689	0.667285	chr9	20975187	20976187	EM10E0897631_enhP;EM10E0897632_enhP:Icam1.4
5.76783	3.63639	2.22373e-126	8.76228e-124	Icam1	ENSMUSG00000037405	Icam1	EM10E0897668_enhP;EM10E0897669_enhP:Icam1	0.342946	-0.599689	0.667285	chr9	21014471	21015471	EM10E0897668_enhP;EM10E0897669_enhP:Icam1.6
5.76783	3.63639	2.22373e-126	8.76228e-124	Icam1	ENSMUSG00000037405	Icam1	EM10E0897673_enhP;EM10E0897674_enhP:Icam1	0.377314	-0.599689	0.667285	chr9	21016557	21017557	EM10E0897673_enhP;EM10E0897674_enhP:Icam1.7
5.76783	3.63639	2.22373e-126	8.76228e-124	Icam1	ENSMUSG00000037405	Icam1	EM10E0897687_enhP;EM10E0897688_enhP;EM10E0897689_enhP:Icam1	0.261091	-0.599689	0.667285	chr9	21030357	21031357	EM10E0897687_enhP;EM10E0897688_enhP;EM10E0897689_enhP:Icam1.2
5.76783	3.63639	2.22373e-126	8.76228e-124	Icam1	ENSMUSG00000037405	Icam1	EM10E0897694_enhP:Icam1	0.370615	-0.599689	0.667285	chr9	21032903	21033903	EM10E0897694_enhP:Icam1.5
5.76783	3.63639	2.22373e-126	8.76228e-124	Icam1	ENSMUSG00000037405	Icam1	EM10E0897704_enhD;EM10E0897705_enhD:Icam1	0.361213	-0.599689	0.667285	chr9	21040683	21041683	EM10E0897704_enhD;EM10E0897705_enhD:Icam1.3
0.841861	3.7072	1.17541e-06	3.70266e-05	Cp	ENSMUSG00000003617	Cp	EM10E0725118_enhD:Cp	0.30428	-0.63396	0.737096	chr3	19953569	19954569	EM10E0725118_enhD:Cp.2
0.841861	3.7072	1.17541e-06	3.70266e-05	Cp	ENSMUSG00000003617	Cp	EM10E0725133_enhD:Cp	0.0324639	-0.63396	0.737096	chr3	19978104	19979104	EM10E0725133_enhD:Cp.1
1.16502	5.5651	0.0200936	0.200227	Gfap	ENSMUSG00000020932	Gfap	EM10E0521271_enhD:Gfap	0.105832	-0.498353	0.789004	chr11	102874484	102875484	EM10E0521271_enhD:Gfap.6
1.16502	5.5651	0.0200936	0.200227	Gfap	ENSMUSG00000020932	Gfap	EM10E0521277_enhP:Gfap	0.0691336	-0.498353	0.789004	chr11	102881465	102882465	EM10E0521277_enhP:Gfap.5
1.16502	5.5651	0.0200936	0.200227	Gfap	ENSMUSG00000020932	Gfap	EM10E0521285_enhD;EM10E0521286_enhD;EM10E0521287_enhD:Gfap	0.287358	-0.498353	0.789004	chr11	102892897	102893897	EM10E0521285_enhD;EM10E0521286_enhD;EM10E0521287_enhD:Gfap.4
1.16502	5.5651	0.0200936	0.200227	Gfap	ENSMUSG00000020932	Gfap	EM10E0521293_enhP:Gfap	0.125308	-0.498353	0.789004	chr11	102898125	102899125	EM10E0521293_enhP:Gfap.1
1.16502	5.5651	0.0200936	0.200227	Gfap	ENSMUSG00000020932	Gfap	EM10E0521297_enhD;EM10E0521298_enhD;EM10E0521299_enhD:Gfap	0.0303368	-0.498353	0.789004	chr11	102921330	102922330	EM10E0521297_enhD;EM10E0521298_enhD;EM10E0521299_enhD:Gfap.2
1.16502	5.5651	0.0200936	0.200227	Gfap	ENSMUSG00000020932	Gfap	EM10E0521309_enhP:Gfap	0.27212	-0.498353	0.789004	chr11	102945492	102946492	EM10E0521309_enhP:Gfap.3
1.16502	5.5651	0.0200936	0.200227	Gfap	ENSMUSG00000020932	Gfap	EM10E0521309_enhP:Gfap	0.27212	-0.498353	0.789004	chr11	102945492	102946492	EM10E0521309_enhP:Gfap.3
1.87414	3.39212	2.72888e-19	3.0014e-17	Mmp19	ENSMUSG00000025355	Mmp19	EM10E0492486_enhP:Mmp19	0.489908	-0.676928	0.795623	chr10	128742705	128743705	EM10E0492486_enhP:Mmp19.2
1.87414	3.39212	2.72888e-19	3.0014e-17	Mmp19	ENSMUSG00000025355	Mmp19	EM10E0492506_enhP;EM10E0492507_enhD:Mmp19	0.414745	-0.676928	0.795623	chr10	128778915	128779915	EM10E0492506_enhP;EM10E0492507_enhD:Mmp19.1
1.87414	3.39212	2.72888e-19	3.0014e-17	Mmp19	ENSMUSG00000025355	Mmp19	EM10E0492523_enhP:Mmp19	0.140454	-0.676928	0.795623	chr10	128822217	128823217	EM10E0492523_enhP:Mmp19.3
7.62562	7.38836	9.33399e-09	4.08823e-07	C4b	ENSMUSG00000073418	C4b	EM10E0640249_enhD;EM10E0640250_enhD;EM10E0640251_enhD:C4b	0.229664	-0.507876	0.839941	chr17	34699950	34700950	EM10E0640249_enhD;EM10E0640250_enhD;EM10E0640251_enhD:C4b.1
7.62562	7.38836	9.33399e-09	4.08823e-07	C4b	ENSMUSG00000073418	C4b	EM10E0640249_enhD;EM10E0640250_enhD;EM10E0640251_enhD:C4b	0.229664	-0.507876	0.839941	chr17	34699950	34700950	EM10E0640249_enhD;EM10E0640250_enhD;EM10E0640251_enhD:C4b.1
1.24423	3.48754	8.5431e-12	5.37862e-10	Igf2bp3	ENSMUSG00000029814	Igf2bp3	EM10E0819590_enhP:Igf2bp3	0.348865	-0.940875	0.845026	chr6	49212932	49213932	EM10E0819590_enhP:Igf2bp3.3
1.24423	3.48754	8.5431e-12	5.37862e-10	Igf2bp3	ENSMUSG00000029814	Igf2bp3	EM10E0819599_enhD;EM10E0819600_enhD;EM10E0819601_enhD;EM10E0819602_enhD;EM10E0819603_enhD:Igf2bp3	0.489861	-0.940875	0.845026	chr6	49217412	49218412	EM10E0819599_enhD;EM10E0819600_enhD;EM10E0819601_enhD;EM10E0819602_enhD;EM10E0819603_enhD:Igf2bp3.1
1.24423	3.48754	8.5431e-12	5.37862e-10	Igf2bp3	ENSMUSG00000029814	Igf2bp3	EM10E0819619_enhP;EM10E0819620_enhP:Igf2bp3	0.0733823	-0.940875	0.845026	chr6	49262414	49263414	EM10E0819619_enhP;EM10E0819620_enhP:Igf2bp3.2
0.683059	2.46951	0.0475632	0.376939	Clxn	ENSMUSG00000068617	Efcab1	EM10E0616550_enhD;EM10E0616551_enhD:Efcab1	0.399176	-1.00489	0.881181	chr16	14893976	14894976	EM10E0616550_enhD;EM10E0616551_enhD:Efcab1.1
0.683059	2.46951	0.0475632	0.376939	Clxn	ENSMUSG00000068617	Efcab1	EM10E0616556_enhD;EM10E0616557_enhD;EM10E0616558_enhD;EM10E0616559_enhD:Efcab1	0.444961	-1.00489	0.881181	chr16	14939961	14940961	EM10E0616556_enhD;EM10E0616557_enhD;EM10E0616558_enhD;EM10E0616559_enhD:Efcab1.2
0.674556	4.27581	1.11336e-07	4.1747e-06	Bnip3	ENSMUSG00000078566	Bnip3	EM10E0867585_enhD:Bnip3	0.113623	-0.735143	0.889011	chr7	138906715	138907715	EM10E0867585_enhD:Bnip3.2
0.674556	4.27581	1.11336e-07	4.1747e-06	Bnip3	ENSMUSG00000078566	Bnip3	EM10E0867590_enhP:Bnip3	0.107175	-0.735143	0.889011	chr7	138909670	138910670	EM10E0867590_enhP:Bnip3.1
0.674556	4.27581	1.11336e-07	4.1747e-06	Bnip3	ENSMUSG00000078566	Bnip3	EM10E0867604_enhP:Bnip3	0.255152	-0.735143	0.889011	chr7	138941262	138942262	EM10E0867604_enhP:Bnip3.3
4.92573	4.63959	4.09817e-218	2.34149e-215	Ifih1	ENSMUSG00000026896	Ifih1	EM10E0697221_enhD;EM10E0697222_enhD:Ifih1	0.29728	-0.451303	0.926435	chr2	62643318	62644318	EM10E0697221_enhD;EM10E0697222_enhD:Ifih1.1
4.92573	4.63959	4.09817e-218	2.34149e-215	Ifih1	ENSMUSG00000026896	Ifih1	EM10E0697228_enhP:Ifih1	0.0770345	-0.451303	0.926435	chr2	62646578	62647578	EM10E0697228_enhP:Ifih1.2
4.8526	5.57184	4.21394e-08	1.67197e-06	Lgals3bp	ENSMUSG00000033880	Lgals3bp	EM10E0527810_enhP;EM10E0527811_enhP:Lgals3bp	0.0632139	-0.452269	0.933772	chr11	118354153	118355153	EM10E0527810_enhP;EM10E0527811_enhP:Lgals3bp.4
4.8526	5.57184	4.21394e-08	1.67197e-06	Lgals3bp	ENSMUSG00000033880	Lgals3bp	EM10E0527817_enhD;EM10E0527818_enhD:Lgals3bp	0.266375	-0.452269	0.933772	chr11	118362494	118363494	EM10E0527817_enhD;EM10E0527818_enhD:Lgals3bp.5
4.8526	5.57184	4.21394e-08	1.67197e-06	Lgals3bp	ENSMUSG00000033880	Lgals3bp	EM10E0527827_enhD:Lgals3bp	0.251329	-0.452269	0.933772	chr11	118379311	118380311	EM10E0527827_enhD:Lgals3bp.3
4.8526	5.57184	4.21394e-08	1.67197e-06	Lgals3bp	ENSMUSG00000033880	Lgals3bp	EM10E0527828_enhP:Lgals3bp	0.0788977	-0.452269	0.933772	chr11	118399642	118400642	EM10E0527828_enhP:Lgals3bp.6
4.8526	5.57184	4.21394e-08	1.67197e-06	Lgals3bp	ENSMUSG00000033880	Lgals3bp	EM10E0527853_enhD;EM10E0527854_enhD;EM10E0527855_enhD:Lgals3bp	0.315367	-0.452269	0.933772	chr11	118423284	118424284	EM10E0527853_enhD;EM10E0527854_enhD;EM10E0527855_enhD:Lgals3bp.2
4.8526	5.57184	4.21394e-08	1.67197e-06	Lgals3bp	ENSMUSG00000033880	Lgals3bp	EM10E0527862_enhP:Lgals3bp	0.377961	-0.452269	0.933772	chr11	118428611	118429611	EM10E0527862_enhP:Lgals3bp.9
4.8526	5.57184	4.21394e-08	1.67197e-06	Lgals3bp	ENSMUSG00000033880	Lgals3bp	EM10E0527865_enhP:Lgals3bp	0.272275	-0.452269	0.933772	chr11	118429970	118430970	EM10E0527865_enhP:Lgals3bp.8
4.8526	5.57184	4.21394e-08	1.67197e-06	Lgals3bp	ENSMUSG00000033880	Lgals3bp	EM10E0527870_enhD:Lgals3bp	0.165066	-0.452269	0.933772	chr11	118436116	118437116	EM10E0527870_enhD:Lgals3bp.1
4.8526	5.57184	4.21394e-08	1.67197e-06	Lgals3bp	ENSMUSG00000033880	Lgals3bp	EM10E0527876_enhD:Lgals3bp	0.385664	-0.452269	0.933772	chr11	118450488	118451488	EM10E0527876_enhD:Lgals3bp.7
7.5578	3.90536	1.42842e-188	7.41932e-186	C1ra	ENSMUSG00000055172	C1ra	EM10E0834674_enhD;EM10E0834675_enhD;EM10E0834676_enhD;EM10E0834677_enhD;EM10E0834678_enhD:C1ra	0.235375	-0.616333	0.977093	chr6	124480666	124481666	EM10E0834674_enhD;EM10E0834675_enhD;EM10E0834676_enhD;EM10E0834677_enhD;EM10E0834678_enhD:C1ra.2
7.5578	3.90536	1.42842e-188	7.41932e-186	C1ra	ENSMUSG00000055172	C1ra	EM10E0834681_enhD;EM10E0834682_enhD:C1ra	0.107354	-0.616333	0.977093	chr6	124484842	124485842	EM10E0834681_enhD;EM10E0834682_enhD:C1ra.1
0.934885	6.40504	2.63863e-27	4.08835e-25	Tmem108	ENSMUSG00000042757	Tmem108	EM10E0917386_enhD;EM10E0917387_enhD:Tmem108	0.102701	-0.467212	0.989239	chr9	103720936	103721936	EM10E0917386_enhD;EM10E0917387_enhD:Tmem108.3
0.934885	6.40504	2.63863e-27	4.08835e-25	Tmem108	ENSMUSG00000042757	Tmem108	EM10E0917397_enhD;EM10E0917398_enhD:Tmem108	0.00466251	-0.467212	0.989239	chr9	103758842	103759842	EM10E0917397_enhD;EM10E0917398_enhD:Tmem108.1
0.934885	6.40504	2.63863e-27	4.08835e-25	Tmem108	ENSMUSG00000042757	Tmem108	EM10E0917400_enhP:Tmem108	0.0689625	-0.467212	0.989239	chr9	103760502	103761502	EM10E0917400_enhP:Tmem108.2
0.660818	2.3808	0.00555998	0.0709282	Gstt1	ENSMUSG00000001663	Gstt1	EM10E0479382_enhP:Gstt1	0.0378745	-0.76122	0.995906	chr10	75764837	75765837	EM10E0479382_enhP:Gstt1.2
0.660818	2.3808	0.00555998	0.0709282	Gstt1	ENSMUSG00000001663	Gstt1	EM10E0479397_enhD:Gstt1	0.21336	-0.76122	0.995906	chr10	75790506	75791506	EM10E0479397_enhD:Gstt1.4
0.660818	2.3808	0.00555998	0.0709282	Gstt1	ENSMUSG00000001663	Gstt1	EM10E0479398_enhD:Gstt1	0.462515	-0.76122	0.995906	chr10	75794621	75795621	EM10E0479398_enhD:Gstt1.3
0.660818	2.3808	0.00555998	0.0709282	Gstt1	ENSMUSG00000001663	Gstt1	EM10E0479411_enhD;EM10E0479413_enhD;EM10E0479414_enhD:Gstt1	0.170819	-0.76122	0.995906	chr10	75828261	75829261	EM10E0479411_enhD;EM10E0479413_enhD;EM10E0479414_enhD:Gstt1.1
0.660818	2.3808	0.00555998	0.0709282	Gstt1	ENSMUSG00000001663	Gstt1	EM10E0479422_enhP;EM10E0479423_enhP;EM10E0479424_enhP:Gstt1	0.326351	-0.76122	0.995906	chr10	75835312	75836312	EM10E0479422_enhP;EM10E0479423_enhP;EM10E0479424_enhP:Gstt1.5
8.03682	6.36856	5.43198e-09	2.46804e-07	Ifit3	ENSMUSG00000074896	Ifit3	EM10E0676964_enhD:Ifit3	0.0626847	-0.348322	1	chr19	34576809	34577809	EM10E0676964_enhD:Ifit3.1
2.60435	5.73386	6.23324e-147	2.76611e-144	Plekha2	ENSMUSG00000031557	Plekha2	EM10E0873589_enhD;EM10E0873591_enhD:Plekha2	0.0480581	-0.366872	1	chr8	25144156	25145156	EM10E0873589_enhD;EM10E0873591_enhD:Plekha2.1
2.28476	6.20298	2.58865e-129	1.03791e-126	Snx10	ENSMUSG00000038301	Snx10	EM10E0820323_enhD;EM10E0820324_enhD;EM10E0820325_enhD;EM10E0820326_enhD:Snx10	0.136863	-0.371507	1	chr6	51509377	51510377	EM10E0820323_enhD;EM10E0820324_enhD;EM10E0820325_enhD;EM10E0820326_enhD:Snx10.3
2.28476	6.20298	2.58865e-129	1.03791e-126	Snx10	ENSMUSG00000038301	Snx10	EM10E0820332_enhP;EM10E0820333_enhP:Snx10	0.164693	-0.371507	1	chr6	51524673	51525673	EM10E0820332_enhP;EM10E0820333_enhP:Snx10.1
2.28476	6.20298	2.58865e-129	1.03791e-126	Snx10	ENSMUSG00000038301	Snx10	EM10E0820334_enhD:Snx10	0.216568	-0.371507	1	chr6	51529186	51530186	EM10E0820334_enhD:Snx10.2
2.28476	6.20298	2.58865e-129	1.03791e-126	Snx10	ENSMUSG00000038301	Snx10	EM10E0820354_enhD:Snx10	0.299898	-0.371507	1	chr6	51566728	51567728	EM10E0820354_enhD:Snx10.4
0.809326	3.93797	4.23535e-08	1.67901e-06	Hopx	ENSMUSG00000059325	Hopx	EM10E0792306_enhD:Hopx	0.0297996	-0.445922	1	chr5	77089021	77090021	EM10E0792306_enhD:Hopx.3
0.809326	3.93797	4.23535e-08	1.67901e-06	Hopx	ENSMUSG00000059325	Hopx	EM10E0792328_enhD:Hopx	0.0170282	-0.445922	1	chr5	77102729	77103729	EM10E0792328_enhD:Hopx.1
0.809326	3.93797	4.23535e-08	1.67901e-06	Hopx	ENSMUSG00000059325	Hopx	EM10E0792348_enhP;EM10E0792349_enhP:Hopx	0.30624	-0.445922	1	chr5	77123003	77124003	EM10E0792348_enhP;EM10E0792349_enhP:Hopx.2
0.809326	3.93797	4.23535e-08	1.67901e-06	Hopx	ENSMUSG00000059325	Hopx	EM10E0792372_enhD:Hopx	0.258503	-0.445922	1	chr5	77146485	77147485	EM10E0792372_enhD:Hopx.4
8.95663	3.1096	2.20994e-121	8.63349e-119	Tnfsf10	ENSMUSG00000039304	Tnfsf10	EM10E0725696_enhD;EM10E0725697_enhD;EM10E0725698_enhD;EM10E0725699_enhD:Tnfsf10	0.282509	-0.496271	1	chr3	27282935	27283935	EM10E0725696_enhD;EM10E0725697_enhD;EM10E0725698_enhD;EM10E0725699_enhD:Tnfsf10.2
8.95663	3.1096	2.20994e-121	8.63349e-119	Tnfsf10	ENSMUSG00000039304	Tnfsf10	EM10E0725702_enhD:Tnfsf10	0.249569	-0.496271	1	chr3	27288544	27289544	EM10E0725702_enhD:Tnfsf10.1
0.849817	3.54029	1.76454e-07	6.38082e-06	Zfp536	ENSMUSG00000043456	Zfp536	EM10E0847055_enhD:Zfp536	0.0415962	-0.7147	1	chr7	37723716	37724716	EM10E0847055_enhD:Zfp536.2
0.849817	3.54029	1.76454e-07	6.38082e-06	Zfp536	ENSMUSG00000043456	Zfp536	EM10E0847064_enhD:Zfp536	0.267562	-0.7147	1	chr7	37745786	37746786	EM10E0847064_enhD:Zfp536.3
0.849817	3.54029	1.76454e-07	6.38082e-06	Zfp536	ENSMUSG00000043456	Zfp536	EM10E0847074_enhP;EM10E0847075_enhP:Zfp536	0.149342	-0.7147	1	chr7	37771487	37772487	EM10E0847074_enhP;EM10E0847075_enhP:Zfp536.1
0.761177	3.75436	6.56369e-07	2.16616e-05	B3galt5	ENSMUSG00000074892	B3galt5	EM10E0630826_enhP:B3galt5	0.129727	-0.774797	1	chr16	96191103	96192103	EM10E0630826_enhP:B3galt5.2
0.761177	3.75436	6.56369e-07	2.16616e-05	B3galt5	ENSMUSG00000074892	B3galt5	EM10E0630839_enhD:B3galt5	0.28514	-0.774797	1	chr16	96208037	96209037	EM10E0630839_enhD:B3galt5.1
0.761177	3.75436	6.56369e-07	2.16616e-05	B3galt5	ENSMUSG00000074892	B3galt5	EM10E0630843_enhD:B3galt5	0.185355	-0.774797	1	chr16	96221171	96222171	EM10E0630843_enhD:B3galt5.3
2.52969	-0.490023	7.71157e-07	2.51592e-05	Tnfrsf13c	ENSMUSG00000068105	Tnfrsf13c	EM10E0606505_enhD;EM10E0606506_enhD:Tnfrsf13c	0.314832	-1.06625	1	chr15	82203379	82204379	EM10E0606505_enhD;EM10E0606506_enhD:Tnfrsf13c.6
2.52969	-0.490023	7.71157e-07	2.51592e-05	Tnfrsf13c	ENSMUSG00000068105	Tnfrsf13c	EM10E0606508_enhD;EM10E0606509_enhD:Tnfrsf13c	0.0819116	-1.06625	1	chr15	82206281	82207281	EM10E0606508_enhD;EM10E0606509_enhD:Tnfrsf13c.2
2.52969	-0.490023	7.71157e-07	2.51592e-05	Tnfrsf13c	ENSMUSG00000068105	Tnfrsf13c	EM10E0606512_enhP;EM10E0606513_enhP:Tnfrsf13c	0.270701	-1.06625	1	chr15	82211410	82212410	EM10E0606512_enhP;EM10E0606513_enhP:Tnfrsf13c.3
2.52969	-0.490023	7.71157e-07	2.51592e-05	Tnfrsf13c	ENSMUSG00000068105	Tnfrsf13c	EM10E0606518_enhD;EM10E0606519_enhD:Tnfrsf13c	0.0449795	-1.06625	1	chr15	82215975	82216975	EM10E0606518_enhD;EM10E0606519_enhD:Tnfrsf13c.5
2.52969	-0.490023	7.71157e-07	2.51592e-05	Tnfrsf13c	ENSMUSG00000068105	Tnfrsf13c	EM10E0606525_enhD;EM10E0606526_enhD;EM10E0606527_enhD:Tnfrsf13c	0.013919	-1.06625	1	chr15	82220595	82221595	EM10E0606525_enhD;EM10E0606526_enhD;EM10E0606527_enhD:Tnfrsf13c.1
2.52969	-0.490023	7.71157e-07	2.51592e-05	Tnfrsf13c	ENSMUSG00000068105	Tnfrsf13c	EM10E0606528_enhP:Tnfrsf13c	0.131249	-1.06625	1	chr15	82222928	82223928	EM10E0606528_enhP:Tnfrsf13c.9
2.52969	-0.490023	7.71157e-07	2.51592e-05	Tnfrsf13c	ENSMUSG00000068105	Tnfrsf13c	EM10E0606536_enhD;EM10E0606537_enhD:Tnfrsf13c	0.00578741	-1.06625	1	chr15	82229337	82230337	EM10E0606536_enhD;EM10E0606537_enhD:Tnfrsf13c.8
2.52969	-0.490023	7.71157e-07	2.51592e-05	Tnfrsf13c	ENSMUSG00000068105	Tnfrsf13c	EM10E0606540_enhP;EM10E0606541_enhP;EM10E0606542_enhP:Tnfrsf13c	0.274008	-1.06625	1	chr15	82231823	82232823	EM10E0606540_enhP;EM10E0606541_enhP;EM10E0606542_enhP:Tnfrsf13c.7
2.52969	-0.490023	7.71157e-07	2.51592e-05	Tnfrsf13c	ENSMUSG00000068105	Tnfrsf13c	EM10E0606544_enhD:Tnfrsf13c	0.109842	-1.06625	1	chr15	82236295	82237295	EM10E0606544_enhD:Tnfrsf13c.4
2.1636	0.540681	1.0765e-06	3.41462e-05	Wnt2b	ENSMUSG00000027840	Wnt2b	EM10E0740123_enhD;EM10E0740124_enhD;EM10E0740125_enhD:Wnt2b	0.134391	-1.04357	1	chr3	104967295	104968295	EM10E0740123_enhD;EM10E0740124_enhD;EM10E0740125_enhD:Wnt2b.4
2.1636	0.540681	1.0765e-06	3.41462e-05	Wnt2b	ENSMUSG00000027840	Wnt2b	EM10E0740127_enhP:Wnt2b	0.0470163	-1.04357	1	chr3	104992431	104993431	EM10E0740127_enhP:Wnt2b.1
2.1636	0.540681	1.0765e-06	3.41462e-05	Wnt2b	ENSMUSG00000027840	Wnt2b	EM10E0740131_enhP:Wnt2b	0.0535453	-1.04357	1	chr3	104994285	104995285	EM10E0740131_enhP:Wnt2b.2
2.1636	0.540681	1.0765e-06	3.41462e-05	Wnt2b	ENSMUSG00000027840	Wnt2b	EM10E0740136_enhD;EM10E0740137_enhD:Wnt2b	0.014981	-1.04357	1	chr3	105003653	105004653	EM10E0740136_enhD;EM10E0740137_enhD:Wnt2b.3
1.27275	2.39691	2.58565e-06	7.57595e-05	Aldh1b1	ENSMUSG00000035561	Aldh1b1	EM10E0754554_enhD;EM10E0754555_enhD:Aldh1b1	0.116278	-0.730991	1	chr4	45755151	45756151	EM10E0754554_enhD;EM10E0754555_enhD:Aldh1b1.6
1.27275	2.39691	2.58565e-06	7.57595e-05	Aldh1b1	ENSMUSG00000035561	Aldh1b1	EM10E0754558_enhP:Aldh1b1	0.438513	-0.730991	1	chr4	45763010	45764010	EM10E0754558_enhP:Aldh1b1.3
1.27275	2.39691	2.58565e-06	7.57595e-05	Aldh1b1	ENSMUSG00000035561	Aldh1b1	EM10E0754563_enhP;EM10E0754564_enhP;EM10E0754565_enhP;EM10E0754566_enhP;EM10E0754567_enhP:Aldh1b1	0.0698857	-0.730991	1	chr4	45765040	45766040	EM10E0754563_enhP;EM10E0754564_enhP;EM10E0754565_enhP;EM10E0754566_enhP;EM10E0754567_enhP:Aldh1b1.1
1.27275	2.39691	2.58565e-06	7.57595e-05	Aldh1b1	ENSMUSG00000035561	Aldh1b1	EM10E0754573_enhD;EM10E0754575_enhD;EM10E0754576_enhD:Aldh1b1	0.277106	-0.730991	1	chr4	45770613	45771613	EM10E0754573_enhD;EM10E0754575_enhD;EM10E0754576_enhD:Aldh1b1.7
1.27275	2.39691	2.58565e-06	7.57595e-05	Aldh1b1	ENSMUSG00000035561	Aldh1b1	EM10E0754583_enhD:Aldh1b1	0.4171	-0.730991	1	chr4	45789291	45790291	EM10E0754583_enhD:Aldh1b1.5
1.27275	2.39691	2.58565e-06	7.57595e-05	Aldh1b1	ENSMUSG00000035561	Aldh1b1	EM10E0754585_enhD;EM10E0754586_enhD;EM10E0754587_enhD;EM10E0754588_enhD:Aldh1b1	0.194638	-0.730991	1	chr4	45795210	45796210	EM10E0754585_enhD;EM10E0754586_enhD;EM10E0754587_enhD;EM10E0754588_enhD:Aldh1b1.4
1.27275	2.39691	2.58565e-06	7.57595e-05	Aldh1b1	ENSMUSG00000035561	Aldh1b1	EM10E0754615_enhD;EM10E0754616_enhD:Aldh1b1	0.20667	-0.730991	1	chr4	45829815	45830815	EM10E0754615_enhD;EM10E0754616_enhD:Aldh1b1.2
7.8542	1.6561	1.83628e-48	4.30424e-46	Il12rb1	ENSMUSG00000000791	Il12rb1	EM10E0880444_enhP:Il12rb1	0.0764852	-0.798796	1	chr8	70792602	70793602	EM10E0880444_enhP:Il12rb1.1
7.8542	1.6561	1.83628e-48	4.30424e-46	Il12rb1	ENSMUSG00000000791	Il12rb1	EM10E0880473_enhD;EM10E0880474_enhD:Il12rb1	0.165886	-0.798796	1	chr8	70832984	70833984	EM10E0880473_enhD;EM10E0880474_enhD:Il12rb1.4
7.8542	1.6561	1.83628e-48	4.30424e-46	Il12rb1	ENSMUSG00000000791	Il12rb1	EM10E0880476_enhP:Il12rb1	0.21223	-0.798796	1	chr8	70838280	70839280	EM10E0880476_enhP:Il12rb1.2
7.8542	1.6561	1.83628e-48	4.30424e-46	Il12rb1	ENSMUSG00000000791	Il12rb1	EM10E0880487_enhD:Il12rb1	0.0921415	-0.798796	1	chr8	70844224	70845224	EM10E0880487_enhD:Il12rb1.3
0.694282	3.70595	4.57477e-05	0.0010609	Inpp5j	ENSMUSG00000034570	Inpp5j	EM10E0492848_enhP:Inpp5j	0.37326	-1.23009	1	chr11	3513486	3514486	EM10E0492848_enhP:Inpp5j.3
0.694282	3.70595	4.57477e-05	0.0010609	Inpp5j	ENSMUSG00000034570	Inpp5j	EM10E0492851_enhP;EM10E0492852_enhP:Inpp5j	0.292609	-1.23009	1	chr11	3515148	3516148	EM10E0492851_enhP;EM10E0492852_enhP:Inpp5j.2
0.694282	3.70595	4.57477e-05	0.0010609	Inpp5j	ENSMUSG00000034570	Inpp5j	EM10E0492860_enhP:Inpp5j	0.20061	-1.23009	1	chr11	3526690	3527690	EM10E0492860_enhP:Inpp5j.4
0.694282	3.70595	4.57477e-05	0.0010609	Inpp5j	ENSMUSG00000034570	Inpp5j	EM10E0492867_enhP;EM10E0492868_enhP;EM10E0492869_enhP;EM10E0492870_enhP:Inpp5j	0.0759439	-1.23009	1	chr11	3535239	3536239	EM10E0492867_enhP;EM10E0492868_enhP;EM10E0492869_enhP;EM10E0492870_enhP:Inpp5j.1
0.774735	2.84868	0.000113467	0.00240443	Amacr	ENSMUSG00000022244	Amacr	EM10E0594176_enhP:Amacr	0.290017	-0.603762	1	chr15	10952643	10953643	EM10E0594176_enhP:Amacr.2
0.774735	2.84868	0.000113467	0.00240443	Amacr	ENSMUSG00000022244	Amacr	EM10E0594188_enhP:Amacr	0.0385358	-0.603762	1	chr15	10981978	10982978	EM10E0594188_enhP:Amacr.1
0.599438	3.94148	0.000272469	0.00529507	Kcnj3	ENSMUSG00000026824	Kcnj3	EM10E0695805_enhP:Kcnj3	0.451137	-0.686561	1	chr2	55437726	55438726	EM10E0695805_enhP:Kcnj3.1
10.7617	6.87549	0	0	H2-Eb1	ENSMUSG00000060586	H2-Eb1	EM10E0640018_enhP;EM10E0640019_enhP;EM10E0640020_enhP;EM10E0640021_enhP:H2-Eb1	0.130127	-0.384879	1	chr17	34264202	34265202	EM10E0640018_enhP;EM10E0640019_enhP;EM10E0640020_enhP;EM10E0640021_enhP:H2-Eb1.1
10.7617	6.87549	0	0	H2-Eb1	ENSMUSG00000060586	H2-Eb1	EM10E0640072_enhD:H2-Eb1	0.0598372	-0.384879	1	chr17	34313126	34314126	EM10E0640072_enhD:H2-Eb1.2
10.7617	6.87549	0	0	H2-Eb1	ENSMUSG00000060586	H2-Eb1	EM10E0640077_enhD:H2-Eb1	0.164337	-0.384879	1	chr17	34330910	34331910	EM10E0640077_enhD:H2-Eb1.3
5.48464	-2.72223	0.000642696	0.0112812	Klk6	ENSMUSG00000050063	Klk6	EM10E0847614_enhD:Klk6	0.0862452	-3.15142	1	chr7	43787796	43788796	EM10E0847614_enhD:Klk6.1
9.14327	7.11375	0	0	Psmb8	ENSMUSG00000024338	Psmb8	EM10E0639955_enhD;EM10E0639956_enhD:Psmb8	0.0452463	-0.391413	1	chr17	34164471	34165471	EM10E0639955_enhD;EM10E0639956_enhD:Psmb8.1
9.14327	7.11375	0	0	Psmb8	ENSMUSG00000024338	Psmb8	EM10E0639959_enhD;EM10E0639960_enhD:Psmb8	0.400236	-0.391413	1	chr17	34170635	34171635	EM10E0639959_enhD;EM10E0639960_enhD:Psmb8.2
0.918817	2.29851	0.00289903	0.0409443	Smim3	ENSMUSG00000038059	Smim3	EM10E0662138_enhD:Smim3	0.0085186	-0.78722	1	chr18	60480693	60481693	EM10E0662138_enhD:Smim3.1
0.918817	2.29851	0.00289903	0.0409443	Smim3	ENSMUSG00000038059	Smim3	EM10E0662153_enhP;EM10E0662154_enhP:Smim3	0.228388	-0.78722	1	chr18	60499913	60500913	EM10E0662153_enhP;EM10E0662154_enhP:Smim3.3
0.918817	2.29851	0.00289903	0.0409443	Smim3	ENSMUSG00000038059	Smim3	EM10E0662160_enhP:Smim3	0.153255	-0.78722	1	chr18	60502475	60503475	EM10E0662160_enhP:Smim3.2
0.892692	6.64139	1.54572e-24	2.1739e-22	Syn2	ENSMUSG00000009394	Syn2	EM10E0831956_enhD;EM10E0831957_enhD:Syn2	0.112768	-0.434912	1	chr6	115085091	115086091	EM10E0831956_enhD;EM10E0831957_enhD:Syn2.2
0.892692	6.64139	1.54572e-24	2.1739e-22	Syn2	ENSMUSG00000009394	Syn2	EM10E0831959_enhD:Syn2	0.155398	-0.434912	1	chr6	115122979	115123979	EM10E0831959_enhD:Syn2.1
9.20432	-0.0362316	2.7865e-22	3.58352e-20	Cysltr2	ENSMUSG00000033470	Cysltr2	EM10E0587131_enhD:Cysltr2	0.0265139	-0.926154	1	chr14	73000068	73001068	EM10E0587131_enhD:Cysltr2.1
0.749985	8.73761	8.72592e-20	9.87238e-18	Enpp2	ENSMUSG00000022425	Enpp2	EM10E0599080_enhP;EM10E0599081_enhP:Enpp2	0.209483	-0.448568	1	chr15	54920479	54921479	EM10E0599080_enhP;EM10E0599081_enhP:Enpp2.2
0.749985	8.73761	8.72592e-20	9.87238e-18	Enpp2	ENSMUSG00000022425	Enpp2	EM10E0599087_enhD:Enpp2	0.0952909	-0.448568	1	chr15	54935204	54936204	EM10E0599087_enhD:Enpp2.1
0.539843	3.4707	0.0134247	0.145475	Dock5	ENSMUSG00000044447	Dock5	EM10E0586104_enhP:Dock5	0.179011	-0.548104	1	chr14	67932152	67933152	EM10E0586104_enhP:Dock5.2
0.539843	3.4707	0.0134247	0.145475	Dock5	ENSMUSG00000044447	Dock5	EM10E0586109_enhP:Dock5	0.0735997	-0.548104	1	chr14	67933718	67934718	EM10E0586109_enhP:Dock5.1
0.539843	3.4707	0.0134247	0.145475	Dock5	ENSMUSG00000044447	Dock5	EM10E0586116_enhD:Dock5	0.340006	-0.548104	1	chr14	67946132	67947132	EM10E0586116_enhD:Dock5.3
4.30333	-3.60163	0.0144074	0.153612	Gm19345	ENSMUSG00000092216	Gm19345	EM10E0843114_enhD:Gm19345	0.406056	-1.98703	1	chr7	19830462	19831462	EM10E0843114_enhD:Gm19345.1
4.30333	-3.60163	0.0144074	0.153612	Gm19345	ENSMUSG00000092216	Gm19345	EM10E0843123_enhD;EM10E0843124_enhD;EM10E0843125_enhD;EM10E0843126_enhD:Gm19345	0.378116	-1.98703	1	chr7	19843496	19844496	EM10E0843123_enhD;EM10E0843124_enhD;EM10E0843125_enhD;EM10E0843126_enhD:Gm19345.2
4.30333	-3.60163	0.0144074	0.153612	Gm19345	ENSMUSG00000092216	Gm19345	EM10E0843135_enhD:Gm19345	0.405846	-1.98703	1	chr7	19863854	19864854	EM10E0843135_enhD:Gm19345.4
4.30333	-3.60163	0.0144074	0.153612	Gm19345	ENSMUSG00000092216	Gm19345	EM10E0843142_enhP:Gm19345	0.278613	-1.98703	1	chr7	19871897	19872897	EM10E0843142_enhP:Gm19345.3
1.04652	-0.152185	0.0204054	0.202319	Olfml1	ENSMUSG00000051041	Olfml1	EM10E0859625_enhP:Olfml1	0.0584896	-1.17594	1	chr7	107593578	107594578	EM10E0859625_enhP:Olfml1.1
1.04652	-0.152185	0.0204054	0.202319	Olfml1	ENSMUSG00000051041	Olfml1	EM10E0859637_enhD:Olfml1	0.420678	-1.17594	1	chr7	107615940	107616940	EM10E0859637_enhD:Olfml1.2
5.84347	8.97472	0	0	H2-K1	ENSMUSG00000061232	H2-K1	EM10E0639828_enhP:H2-K1	0.153041	-0.390445	1	chr17	33977623	33978623	EM10E0639828_enhP:H2-K1.3
5.84347	8.97472	0	0	H2-K1	ENSMUSG00000061232	H2-K1	EM10E0639835_enhP:H2-K1	0.0349779	-0.390445	1	chr17	33981815	33982815	EM10E0639835_enhP:H2-K1.2
5.84347	8.97472	0	0	H2-K1	ENSMUSG00000061232	H2-K1	EM10E0639874_enhP:H2-K1	0.260137	-0.390445	1	chr17	34038108	34039108	EM10E0639874_enhP:H2-K1.1
5.59848	9.16877	0	0	H2-D1	ENSMUSG00000073411	H2-D1	EM10E0640588_enhD;EM10E0640589_enhP:H2-D1	0.101987	-0.43857	1	chr17	35218362	35219362	EM10E0640588_enhD;EM10E0640589_enhP:H2-D1.6
5.59848	9.16877	0	0	H2-D1	ENSMUSG00000073411	H2-D1	EM10E0640613_enhP:H2-D1	0.0576375	-0.43857	1	chr17	35240372	35241372	EM10E0640613_enhP:H2-D1.4
5.59848	9.16877	0	0	H2-D1	ENSMUSG00000073411	H2-D1	EM10E0640619_enhP:H2-D1	0.140102	-0.43857	1	chr17	35242810	35243810	EM10E0640619_enhP:H2-D1.1
5.59848	9.16877	0	0	H2-D1	ENSMUSG00000073411	H2-D1	EM10E0640628_enhD;EM10E0640629_enhD;EM10E0640630_enhD:H2-D1	0.366942	-0.43857	1	chr17	35257468	35258468	EM10E0640628_enhD;EM10E0640629_enhD;EM10E0640630_enhD:H2-D1.2
5.59848	9.16877	0	0	H2-D1	ENSMUSG00000073411	H2-D1	EM10E0640637_enhP:H2-D1	0.267846	-0.43857	1	chr17	35263490	35264490	EM10E0640637_enhP:H2-D1.3
5.59848	9.16877	0	0	H2-D1	ENSMUSG00000073411	H2-D1	EM10E0640645_enhD;EM10E0640646_enhD:H2-D1	0.389361	-0.43857	1	chr17	35301469	35302469	EM10E0640645_enhD;EM10E0640646_enhD:H2-D1.5
1.55691	4.52041	3.21634e-15	2.62522e-13	Atp7b	ENSMUSG00000006567	Atp7b	EM10E0872748_enhD:Atp7b	0.176212	-0.566122	1	chr8	22039175	22040175	EM10E0872748_enhD:Atp7b.2
1.55691	4.52041	3.21634e-15	2.62522e-13	Atp7b	ENSMUSG00000006567	Atp7b	EM10E0872750_enhD:Atp7b	0.184341	-0.566122	1	chr8	22047764	22048764	EM10E0872750_enhD:Atp7b.1
5.14861	5.42431	8.97796e-305	6.3133e-302	Itgb3	ENSMUSG00000020689	Itgb3	EM10E0522054_enhD:Itgb3	0.294751	-0.450251	1	chr11	104598736	104599736	EM10E0522054_enhD:Itgb3.1
5.14861	5.42431	8.97796e-305	6.3133e-302	Itgb3	ENSMUSG00000020689	Itgb3	EM10E0522060_enhP;EM10E0522061_enhP;EM10E0522063_enhP;EM10E0522064_enhP:Itgb3	0.49143	-0.450251	1	chr11	104608777	104609777	EM10E0522060_enhP;EM10E0522061_enhP;EM10E0522063_enhP;EM10E0522064_enhP:Itgb3.3
5.14861	5.42431	8.97796e-305	6.3133e-302	Itgb3	ENSMUSG00000020689	Itgb3	EM10E0522078_enhD;EM10E0522079_enhD;EM10E0522080_enhD:Itgb3	0.130508	-0.450251	1	chr11	104625199	104626199	EM10E0522078_enhD;EM10E0522079_enhD;EM10E0522080_enhD:Itgb3.2
1.60206	2.97402	3.88555e-12	2.54807e-10	Rab13	ENSMUSG00000027935	Rab13	EM10E0736013_enhP:Rab13	0.250285	-0.616565	1	chr3	90219526	90220526	EM10E0736013_enhP:Rab13.3
1.60206	2.97402	3.88555e-12	2.54807e-10	Rab13	ENSMUSG00000027935	Rab13	EM10E0736029_enhP:Rab13	0.0422036	-0.616565	1	chr3	90248419	90249419	EM10E0736029_enhP:Rab13.2
1.60206	2.97402	3.88555e-12	2.54807e-10	Rab13	ENSMUSG00000027935	Rab13	EM10E0736034_enhP:Rab13	0.11614	-0.616565	1	chr3	90254515	90255515	EM10E0736034_enhP:Rab13.1
5.90033	-1.07246	6.35121e-12	4.083e-10	AW112010	ENSMUSG00000075010	AW112010	EM10E0672466_enhD;EM10E0672467_enhD;EM10E0672468_enhD:AW112010	0.161694	-1.21841	1	chr19	11044789	11045789	EM10E0672466_enhD;EM10E0672467_enhD;EM10E0672468_enhD:AW112010.1
0.712598	4.82149	2.09271e-10	1.15803e-08	Ctso	ENSMUSG00000028015	Ctso	EM10E0733036_enhD:Ctso	0.491223	-0.461294	1	chr3	81883583	81884583	EM10E0733036_enhD:Ctso.3
0.712598	4.82149	2.09271e-10	1.15803e-08	Ctso	ENSMUSG00000028015	Ctso	EM10E0733042_enhD:Ctso	0.228707	-0.461294	1	chr3	81919358	81920358	EM10E0733042_enhD:Ctso.1
0.712598	4.82149	2.09271e-10	1.15803e-08	Ctso	ENSMUSG00000028015	Ctso	EM10E0733051_enhP:Ctso	0.380644	-0.461294	1	chr3	81931340	81932340	EM10E0733051_enhP:Ctso.2
1.88597	1.76418	2.78388e-10	1.50054e-08	Sh3bp2	ENSMUSG00000054520	Sh3bp2	EM10E0785584_enhD:Sh3bp2	0.360379	-0.616428	1	chr5	34489024	34490024	EM10E0785584_enhD:Sh3bp2.5
1.88597	1.76418	2.78388e-10	1.50054e-08	Sh3bp2	ENSMUSG00000054520	Sh3bp2	EM10E0785592_enhP:Sh3bp2	0.120741	-0.616428	1	chr5	34514195	34515195	EM10E0785592_enhP:Sh3bp2.2
1.88597	1.76418	2.78388e-10	1.50054e-08	Sh3bp2	ENSMUSG00000054520	Sh3bp2	EM10E0785602_enhP:Sh3bp2	0.0731248	-0.616428	1	chr5	34526168	34527168	EM10E0785602_enhP:Sh3bp2.4
1.88597	1.76418	2.78388e-10	1.50054e-08	Sh3bp2	ENSMUSG00000054520	Sh3bp2	EM10E0785602_enhP:Sh3bp2	0.0731248	-0.616428	1	chr5	34526168	34527168	EM10E0785602_enhP:Sh3bp2.4
1.88597	1.76418	2.78388e-10	1.50054e-08	Sh3bp2	ENSMUSG00000054520	Sh3bp2	EM10E0785631_enhD;EM10E0785632_enhD:Sh3bp2	0.00921317	-0.616428	1	chr5	34565400	34566400	EM10E0785631_enhD;EM10E0785632_enhD:Sh3bp2.1
1.88597	1.76418	2.78388e-10	1.50054e-08	Sh3bp2	ENSMUSG00000054520	Sh3bp2	EM10E0785634_enhP:Sh3bp2	0.0773722	-0.616428	1	chr5	34572311	34573311	EM10E0785634_enhP:Sh3bp2.3
3.03085	5.99616	4.70241e-177	2.41503e-174	Zc3hav1	ENSMUSG00000029826	Zc3hav1	EM10E0817858_enhP;EM10E0817859_enhP:Zc3hav1	0.108189	-0.42713	1	chr6	38353024	38354024	EM10E0817858_enhP;EM10E0817859_enhP:Zc3hav1.1
3.39847	5.95754	8.46523e-168	4.29921e-165	Serpina3n	ENSMUSG00000021091	Serpina3n	EM10E0546883_enhD:Serpina3n	0.332371	-0.551769	1	chr12	104422293	104423293	EM10E0546883_enhD:Serpina3n.1
2.53058	6.56927	1.41367e-166	7.10067e-164	Parp11	ENSMUSG00000037997	Parp11	EM10E0835773_enhD;EM10E0835774_enhD:Parp11	0.444667	-0.342403	1	chr6	127403921	127404921	EM10E0835773_enhD;EM10E0835774_enhD:Parp11.2
2.53058	6.56927	1.41367e-166	7.10067e-164	Parp11	ENSMUSG00000037997	Parp11	EM10E0835775_enhD:Parp11	0.259428	-0.342403	1	chr6	127405375	127406375	EM10E0835775_enhD:Parp11.1
2.53058	6.56927	1.41367e-166	7.10067e-164	Parp11	ENSMUSG00000037997	Parp11	EM10E0835777_enhD:Parp11	0.460381	-0.342403	1	chr6	127417492	127418492	EM10E0835777_enhD:Parp11.3
2.53058	6.56927	1.41367e-166	7.10067e-164	Parp11	ENSMUSG00000037997	Parp11	EM10E0835780_enhD:Parp11	0.152722	-0.342403	1	chr6	127440032	127441032	EM10E0835780_enhD:Parp11.4
2.53058	6.56927	1.41367e-166	7.10067e-164	Parp11	ENSMUSG00000037997	Parp11	EM10E0835784_enhP:Parp11	0.185916	-0.342403	1	chr6	127445270	127446270	EM10E0835784_enhP:Parp11.6
2.53058	6.56927	1.41367e-166	7.10067e-164	Parp11	ENSMUSG00000037997	Parp11	EM10E0835794_enhP:Parp11	0.124606	-0.342403	1	chr6	127454067	127455067	EM10E0835794_enhP:Parp11.5
8.92359	3.58152	9.44172e-164	4.54276e-161	Zbp1	ENSMUSG00000027514	Zbp1	EM10E0721723_enhD;EM10E0721724_enhD;EM10E0721726_enhD;EM10E0721727_enhD;EM10E0721728_enhD;EM10E0721729_enhD;EM10E0721730_enhD:Zbp1	0.299694	-0.472106	1	chr2	173172464	173173464	EM10E0721723_enhD;EM10E0721724_enhD;EM10E0721726_enhD;EM10E0721727_enhD;EM10E0721728_enhD;EM10E0721729_enhD;EM10E0721730_enhD:Zbp1.5
8.92359	3.58152	9.44172e-164	4.54276e-161	Zbp1	ENSMUSG00000027514	Zbp1	EM10E0721750_enhD;EM10E0721751_enhD:Zbp1	0.0520451	-0.472106	1	chr2	173229368	173230368	EM10E0721750_enhD;EM10E0721751_enhD:Zbp1.2
8.92359	3.58152	9.44172e-164	4.54276e-161	Zbp1	ENSMUSG00000027514	Zbp1	EM10E0721760_enhD:Zbp1	0.0119298	-0.472106	1	chr2	173242559	173243559	EM10E0721760_enhD:Zbp1.4
8.92359	3.58152	9.44172e-164	4.54276e-161	Zbp1	ENSMUSG00000027514	Zbp1	EM10E0721771_enhD;EM10E0721772_enhD:Zbp1	0.251192	-0.472106	1	chr2	173253606	173254606	EM10E0721771_enhD;EM10E0721772_enhD:Zbp1.3
8.92359	3.58152	9.44172e-164	4.54276e-161	Zbp1	ENSMUSG00000027514	Zbp1	EM10E0721775_enhD;EM10E0721776_enhD:Zbp1	0.269151	-0.472106	1	chr2	173257462	173258462	EM10E0721775_enhD;EM10E0721776_enhD:Zbp1.1

## Sheet: Enhancer_windows_nochange
"logFC" RNA IFN-g 24h (+0h) vs. Ctrl	"logCPM" RNA IFN-g 24h (+0h) vs. Ctrl	"PValue" RNA IFN-g 24h (+0h) vs. Ctrl	"FDR" RNA IFN-g 24h (+0h) vs. Ctrl	GeneSymbol	ENS_102		Enh_region_ID	ATAC_logFC	Enh_region_chr	Enh_region_start	Enh_region_end
3.25903	-3.09797	0.00825579	0.0983465	Spint1	ENSMUSG00000027315	Spint1	EM10E0707235_enhD;EM10E0707237_enhD:Spint1	9.24721e-05	chr2	119263083	119264083	EM10E0707235_enhD;EM10E0707237_enhD:Spint1.1
1.31331	-1.5958	0.0353335	0.305529	Pnp2	ENSMUSG00000068417	Pnp2	EM10E0581370_enhP;EM10E0581371_enhP:Pnp2	9.42412e-05	chr14	50944992	50945992	EM10E0581370_enhP;EM10E0581371_enhP:Pnp2.3
5.76783	3.63639	2.22373e-126	8.76228e-124	Icam1	ENSMUSG00000037405	Icam1	EM10E0897626_enhD;EM10E0897627_enhD;EM10E0897628_enhD;EM10E0897629_enhD:Icam1	0.000101412	chr9	20972045	20973045	EM10E0897626_enhD;EM10E0897627_enhD;EM10E0897628_enhD;EM10E0897629_enhD:Icam1.1
3.69009	-1.31329	3.71627e-07	1.27143e-05	Rhbg	ENSMUSG00000104445	Rhbg	EM10E0734930_enhD;EM10E0734931_enhD;EM10E0734932_enhD;EM10E0734933_enhD:Rhbg	0.000202571	chr3	88220529	88221529	EM10E0734930_enhD;EM10E0734931_enhD;EM10E0734932_enhD;EM10E0734933_enhD:Rhbg.3
3.69009	-1.31329	3.71627e-07	1.27143e-05	Rhbg	ENSMUSG00000104445	Rhbg	EM10E0734930_enhD;EM10E0734931_enhD;EM10E0734932_enhD;EM10E0734933_enhD:Rhbg	0.000202571	chr3	88220529	88221529	EM10E0734930_enhD;EM10E0734931_enhD;EM10E0734932_enhD;EM10E0734933_enhD:Rhbg.3
1.45793	1.68118	5.95886e-07	1.97368e-05	Unc93b1	ENSMUSG00000036908	Unc93b1	EM10E0669263_enhD:Unc93b1	0.000222056	chr19	3983234	3984234	EM10E0669263_enhD:Unc93b1.2
1.63543	6.28667	3.10592e-58	8.40033e-56	Edem1	ENSMUSG00000030104	Edem1	EM10E0830836_enhD:Edem1	0.000230496	chr6	108804841	108805841	EM10E0830836_enhD:Edem1.3
0.717063	1.31458	0.0409519	0.336963	Traf3ip2	ENSMUSG00000019842	Traf3ip2	EM10E0471998_enhD:Traf3ip2	0.000370315	chr10	39563519	39564519	EM10E0471998_enhD:Traf3ip2.8
1.66785	0.112716	0.00015582	0.00318953	Shh	ENSMUSG00000002633	Shh	EM10E0783822_enhD;EM10E0783823_enhP;EM10E0783824_enhP;EM10E0783825_enhP;EM10E0783826_enhP;EM10E0783827_enhP:Shh	0.000386484	chr5	28464422	28465422	EM10E0783822_enhD;EM10E0783823_enhP;EM10E0783824_enhP;EM10E0783825_enhP;EM10E0783826_enhP;EM10E0783827_enhP:Shh.2
3.5209	-0.54077	5.2562e-10	2.75833e-08	Rgs22	ENSMUSG00000037627	Rgs22	EM10E0596751_enhP:Rgs22	0.000418304	chr15	36163556	36164556	EM10E0596751_enhP:Rgs22.1
0.670273	3.30419	0.00015394	0.00315811	Spag1	ENSMUSG00000037617	Spag1	EM10E0596751_enhP:Spag1	0.000418304	chr15	36163556	36164556	EM10E0596751_enhP:Spag1.1
3.51848	-2.48175	0.000597236	0.0105644	I830134H01Rik	ENSMUSG00000069554	I830134H01Rik	EM10E0677803_enhD:I830134H01Rik	0.000447626	chr19	38086781	38087781	EM10E0677803_enhD:I830134H01Rik.2
0.654721	4.31316	1.61851e-06	4.9451e-05	Cep55	ENSMUSG00000024989	Cep55	EM10E0677803_enhD:Cep55	0.000447626	chr19	38086781	38087781	EM10E0677803_enhD:Cep55.2
1.47937	-1.22542	0.00971906	0.111955	Proca1	ENSMUSG00000044122	Proca1	EM10E0511204_enhD:Proca1	0.000447864	chr11	78159201	78160201	EM10E0511204_enhD:Proca1.4
1.64985	-1.71814	0.0190189	0.191987	Gm27019	ENSMUSG00000097998	Gm27019	EM10E0816147_enhD:Gm27019	0.000466525	chr6	31070680	31071680	EM10E0816147_enhD:Gm27019.3
1.08192	-0.652269	0.038338	0.322201	Tmsb10b	ENSMUSG00000091955	Gm9844	EM10E0843553_enhP:Gm9844	0.000518995	chr7	24903222	24904222	EM10E0843553_enhP:Gm9844.1
5.34054	-0.433153	4.63195e-15	3.72087e-13	Spo11	ENSMUSG00000005883	Spo11	EM10E0721573_enhD;EM10E0721574_enhD:Spo11	0.000632052	chr2	172958480	172959480	EM10E0721573_enhD;EM10E0721574_enhD:Spo11.1
4.62086	-3.60156	0.0105407	0.119611	D630044L22Rik	ENSMUSG00000097405	D630044L22Rik	EM10E0635740_enhD:D630044L22Rik	0.000765864	chr17	25911534	25912534	EM10E0635740_enhD:D630044L22Rik.2
0.900339	1.78062	0.00122792	0.0198465	Cemip	ENSMUSG00000052353	Cemip	EM10E0855485_enhP:Cemip	0.00100272	chr7	84085303	84086303	EM10E0855485_enhP:Cemip.2
3.13923	2.49519	2.92837e-33	5.29051e-31	Helz2	ENSMUSG00000027580	Helz2	EM10E0723311_enhP;EM10E0723312_enhD:Helz2	0.0010706	chr2	181243574	181244574	EM10E0723311_enhP;EM10E0723312_enhD:Helz2.1
1.36864	1.75849	1.02952e-06	3.27927e-05	Map4k1	ENSMUSG00000037337	Map4k1	EM10E0845030_enhD:Map4k1	0.00108829	chr7	28938321	28939321	EM10E0845030_enhD:Map4k1.1
0.739444	6.54877	1.26563e-16	1.1478e-14	Mcm5	ENSMUSG00000005410	Mcm5	EM10E0881359_enhP:Mcm5	0.00117844	chr8	75108263	75109263	EM10E0881359_enhP:Mcm5.2
0.554024	2.55654	0.011624	0.129525	Wdr54	ENSMUSG00000030032	Wdr54	EM10E0824762_enhP:Wdr54	0.00144652	chr6	83137736	83138736	EM10E0824762_enhP:Wdr54.1
3.00269	-0.603278	4.39099e-08	1.73169e-06	Lck	ENSMUSG00000000409	Lck	EM10E0769661_enhP:Lck	0.00166485	chr4	129541435	129542435	EM10E0769661_enhP:Lck.6
1.22463	4.69149	5.00117e-28	8.04907e-26	Sbno2	ENSMUSG00000035673	Sbno2	EM10E0481013_enhD:Sbno2	0.00176178	chr10	80086593	80087593	EM10E0481013_enhD:Sbno2.6
0.674281	6.61098	1.1914e-15	1.01032e-13	H3c7	ENSMUSG00000100210	Hist1h3f	EM10E0553700_enhD;EM10E0553701_enhD:Hist1h3f	0.00193017	chr13	23525810	23526810	EM10E0553700_enhD;EM10E0553701_enhD:Hist1h3f.5
0.501799	5.35871	3.8163e-07	1.29788e-05	H2bc7	ENSMUSG00000069268	Hist1h2bf	EM10E0553700_enhD;EM10E0553701_enhD:Hist1h2bf	0.00193017	chr13	23525810	23526810	EM10E0553700_enhD;EM10E0553701_enhD:Hist1h2bf.3
0.541986	6.04207	4.48146e-08	1.76585e-06	Pcdhgc4	ENSMUSG00000023036	Pcdhgc4	EM10E0658097_enhP:Pcdhgc4	0.00203515	chr18	37808421	37809421	EM10E0658097_enhP:Pcdhgc4.8
2.37676	4.80707	7.40509e-86	2.43505e-83	Idnk	ENSMUSG00000050002	Idnk	EM10E0563057_enhP;EM10E0563058_enhP:Idnk	0.00232588	chr13	58112298	58113298	EM10E0563057_enhP;EM10E0563058_enhP:Idnk.4
1.69382	-2.01588	0.0238551	0.227113	Bin2	ENSMUSG00000098112	Bin2	EM10E0612383_enhD;EM10E0612384_enhD:Bin2	0.00240161	chr15	100621648	100622648	EM10E0612383_enhD;EM10E0612384_enhD:Bin2.5
0.91279	3.19743	0.000122435	0.0025718	Hmga2	ENSMUSG00000056758	Hmga2	EM10E0490067_enhP;EM10E0490068_enhP:Hmga2	0.00254213	chr10	120446206	120447206	EM10E0490067_enhP;EM10E0490068_enhP:Hmga2.4
1.27604	-1.2158	0.0326834	0.288898	Avil	ENSMUSG00000025432	Avil	EM10E0491383_enhD:Avil	0.00261071	chr10	126990025	126991025	EM10E0491383_enhD:Avil.3
2.01578	-2.59968	0.026327	0.246286	Gm4755	ENSMUSG00000096940	Gm4755	EM10E0530724_enhD:Gm4755	0.00271238	chr12	8783897	8784897	EM10E0530724_enhD:Gm4755.1
0.702116	4.09562	2.59912e-07	9.06982e-06	Sdc1	ENSMUSG00000020592	Sdc1	EM10E0530724_enhD:Sdc1	0.00271238	chr12	8783897	8784897	EM10E0530724_enhD:Sdc1.1
0.640897	2.7434	0.00288745	0.0408227	Psmc3ip	ENSMUSG00000019303	Psmc3ip	EM10E0520137_enhD:Psmc3ip	0.00282477	chr11	101066708	101067708	EM10E0520137_enhD:Psmc3ip.5
0.719747	7.64082	7.28979e-19	7.69519e-17	Timp3	ENSMUSG00000020044	Timp3	EM10E0483626_enhD:Timp3	0.00298144	chr10	86332648	86333648	EM10E0483626_enhD:Timp3.1
0.88805	4.91225	1.44642e-14	1.11866e-12	Psrc1	ENSMUSG00000068744	Psrc1	EM10E0741182_enhP:Psrc1	0.00301903	chr3	108415904	108416904	EM10E0741182_enhP:Psrc1.4
0.670837	5.16035	1.87962e-11	1.15943e-09	Fen1	ENSMUSG00000024742	Fen1	EM10E0672019_enhP:Fen1	0.00306886	chr19	10181765	10182765	EM10E0672019_enhP:Fen1.3
0.855551	5.092	1.91815e-17	1.84191e-15	Ifnar2	ENSMUSG00000022971	Ifnar2	EM10E0628823_enhD;EM10E0628825_enhD:Ifnar2	0.00313869	chr16	91362760	91363760	EM10E0628823_enhD;EM10E0628825_enhD:Ifnar2.5
4.53949	-1.36105	4.30791e-08	1.70187e-06	Tnfsf13b	ENSMUSG00000031497	Tnfsf13b	EM10E0870716_enhD;EM10E0870717_enhD:Tnfsf13b	0.00330388	chr8	10053336	10054336	EM10E0870716_enhD;EM10E0870717_enhD:Tnfsf13b.1
1.4843	0.888933	2.74877e-05	0.000664063	Slc37a1	ENSMUSG00000024036	Slc37a1	EM10E0638849_enhD;EM10E0638850_enhD:Slc37a1	0.0033364	chr17	31326032	31327032	EM10E0638849_enhD;EM10E0638850_enhD:Slc37a1.3
1.4843	0.888933	2.74877e-05	0.000664063	Slc37a1	ENSMUSG00000024036	Slc37a1	EM10E0638849_enhD;EM10E0638850_enhD:Slc37a1	0.0033364	chr17	31326032	31327032	EM10E0638849_enhD;EM10E0638850_enhD:Slc37a1.3
0.514469	2.50139	0.0216332	0.21151	Slc31a2	ENSMUSG00000066152	Slc31a2	EM10E0757657_enhD:Slc31a2	0.00337087	chr4	62250531	62251531	EM10E0757657_enhD:Slc31a2.3
0.501994	6.33261	2.51805e-07	8.83304e-06	Ckap2	ENSMUSG00000037725	Ckap2	EM10E0872790_enhP;EM10E0872791_enhP:Ckap2	0.00355181	chr8	22193095	22194095	EM10E0872790_enhP;EM10E0872791_enhP:Ckap2.3
0.529278	3.45655	0.0017209	0.0265381	Cdca5	ENSMUSG00000024791	Cdca5	EM10E0670537_enhP;EM10E0670538_enhP:Cdca5	0.00368377	chr19	6117127	6118127	EM10E0670537_enhP;EM10E0670538_enhP:Cdca5.1
11.05	3.9233	1.25621e-211	7.0023e-209	Batf2	ENSMUSG00000039699	Batf2	EM10E0670537_enhP;EM10E0670538_enhP:Batf2	0.00368377	chr19	6117127	6118127	EM10E0670537_enhP;EM10E0670538_enhP:Batf2.1
0.587432	4.09816	4.63903e-05	0.00107362	Tango2	ENSMUSG00000013539	Tango2	EM10E0617409_enhD;EM10E0617410_enhD;EM10E0617411_enhD;EM10E0617412_enhD:Tango2	0.0037153	chr16	18386796	18387796	EM10E0617409_enhD;EM10E0617410_enhD;EM10E0617411_enhD;EM10E0617412_enhD:Tango2.6
0.633155	7.27849	1.37803e-14	1.06939e-12	Cpeb4	ENSMUSG00000020300	Cpeb4	EM10E0498298_enhD:Cpeb4	0.00372667	chr11	31906259	31907259	EM10E0498298_enhD:Cpeb4.6
1.14892	6.23208	6.0544e-37	1.18263e-34	Nub1	ENSMUSG00000028954	Nub1	EM10E0783122_enhP:Nub1	0.00379332	chr5	24684266	24685266	EM10E0783122_enhP:Nub1.1
0.714106	6.7602	8.42303e-18	8.33333e-16	Plxna2	ENSMUSG00000026640	Plxna2	EM10E0465687_enhD;EM10E0465688_enhD:Plxna2	0.00386365	chr1	194613402	194614402	EM10E0465687_enhD;EM10E0465688_enhD:Plxna2.4
0.808258	3.67438	4.0366e-07	1.36267e-05	Vps37d	ENSMUSG00000043614	Vps37d	EM10E0806521_enhD:Vps37d	0.00387996	chr5	135103691	135104691	EM10E0806521_enhD:Vps37d.4
1.1298	1.42647	0.000511777	0.00922774	C1qc	ENSMUSG00000036896	C1qc	EM10E0773543_enhD:C1qc	0.00389268	chr4	136878286	136879286	EM10E0773543_enhD:C1qc.4
1.20034	1.26943	0.000399901	0.00746372	C1qa	ENSMUSG00000036887	C1qa	EM10E0773543_enhD:C1qa	0.00389268	chr4	136878286	136879286	EM10E0773543_enhD:C1qa.4
0.536308	3.80874	0.000357634	0.00674091	E2f2	ENSMUSG00000018983	E2f2	EM10E0773151_enhD;EM10E0773152_enhD;EM10E0773153_enhD;EM10E0773154_enhD;EM10E0773155_enhP;EM10E0773156_enhP;EM10E0773157_enhP:E2f2	0.00432004	chr4	136134624	136135624	EM10E0773151_enhD;EM10E0773152_enhD;EM10E0773153_enhD;EM10E0773154_enhD;EM10E0773155_enhP;EM10E0773156_enhP;EM10E0773157_enhP:E2f2.3
3.97237	-2.13433	2.52025e-05	0.000613394	Plek2	ENSMUSG00000021118	Plek2	EM10E0540789_enhP:Plek2	0.00444325	chr12	78860352	78861352	EM10E0540789_enhP:Plek2.1
1.11211	-0.33056	0.0217552	0.212521	Ebf3	ENSMUSG00000010476	Ebf3	EM10E0867413_enhD;EM10E0867414_enhD;EM10E0867415_enhD;EM10E0867416_enhD;EM10E0867417_enhD:Ebf3	0.00453535	chr7	137321148	137322148	EM10E0867413_enhD;EM10E0867414_enhD;EM10E0867415_enhD;EM10E0867416_enhD;EM10E0867417_enhD:Ebf3.1
0.934885	6.40504	2.63863e-27	4.08835e-25	Tmem108	ENSMUSG00000042757	Tmem108	EM10E0917397_enhD;EM10E0917398_enhD:Tmem108	0.00466251	chr9	103758842	103759842	EM10E0917397_enhD;EM10E0917398_enhD:Tmem108.1
0.91906	3.90703	3.47647e-10	1.85348e-08	Shroom3	ENSMUSG00000029381	Shroom3	EM10E0793741_enhD;EM10E0793742_enhD;EM10E0793743_enhD:Shroom3	0.00470229	chr5	92698148	92699148	EM10E0793741_enhD;EM10E0793742_enhD;EM10E0793743_enhD:Shroom3.2
0.541986	6.04207	4.48146e-08	1.76585e-06	Pcdhgc4	ENSMUSG00000023036	Pcdhgc4	EM10E0658145_enhD;EM10E0658146_enhD;EM10E0658147_enhD:Pcdhgc4	0.00494662	chr18	37848966	37849966	EM10E0658145_enhD;EM10E0658146_enhD;EM10E0658147_enhD:Pcdhgc4.2
0.580883	6.10409	6.51201e-09	2.92337e-07	Lgmn	ENSMUSG00000021190	Lgmn	EM10E0546400_enhP:Lgmn	0.00499319	chr12	102469466	102470466	EM10E0546400_enhP:Lgmn.4
0.713101	3.50809	1.6686e-05	0.000418828	E2f1	ENSMUSG00000027490	E2f1	EM10E0714864_enhD;EM10E0714865_enhD;EM10E0714866_enhD:E2f1	0.00508415	chr2	154584123	154585123	EM10E0714864_enhD;EM10E0714865_enhD;EM10E0714866_enhD:E2f1.1
[truncated: 4,195 more rows]
