# Supplementary material for: Distinct transcriptomic and epigenomic responses of mature oligodendrocytes during disease progression in a mouse model of multiple sclerosis
Source: Nat Neurosci. 2025 Nov 17;28(12):2612–27. doi: 10.1038/s41593-025-02100-3 (PMC12672374; doi:10.1038/s41593-025-02100-3)
Supplement: Supplementary file 5 — Differential modality features between time points. [file 41593_2025_2100_MOESM5_ESM.xlsx]

## Sheet: Summary
Supplementary Table 3. Differential modality features between timepoints
Naming of the sheets	(Features Selection Acronym)_(Modality Aggregation Acronym)_(OLG population)
Features Selection Acronym	Full Name	Description
DGE	Differential Genes Expression	Selection of differentially expressed genes using DESeq2 between timepoint (Early/Ctrl, Peak/Early, Late/Early, and Peak/Late) with absolute log2FC > 1, pvalue adjusted < 0.01 and baseMean > 1
DGA	Differential Genes Accessibility	Selection of differentially genes/promoters accessibility using DESeq2 between timepoint (Early/Ctrl, Peak/Early, Late/Early, and Peak/Late) with absolute log2FC > 1, pvalue adjusted < 0.01 and baseMean > 1
DDORC	Differential Domains Of Regulatory Chromatin	Selection of differentially DORC counts (DORC scores reverted back to counts) using DESeq2 between timepoint (Early/Ctrl, Peak/Early, Late/Early, and Peak/Late) with absolute log2FC > 1, pvalue adjusted < 0.01 and baseMean > 1
Modality Aggregation Acronym	Full Name	Description
RNA	Gene Expression	Pseudobulk aggregation of genes expression by timepoints and OLG population, normalized by the total number of counts multiplied by 10,000 and natural log transformed
ACC	Chromatin Accessibility	Pseudobulk aggregation of gene activity (Gene body + 500bp upstream TSS) by timepoints and OLG population, normalized by the total number of counts multiplied by 10,000 and natural log transformed
GRC	Gene Regulatory Chromatin	Average expression of Gene Regulatory Chromatin scores (counts falling in peaks associated to gene within 50,000 bp distance from the gene TSS where aggregated by peak to gene connection, normalized by total number of fragments per cell and scaling factor of 10,000) by timepoints and OLG population
OLG population
MOL56
MOL2
OPC

## Sheet: DGE_RNA_MOL56
Pseudobulk aggregation of the expression of differentially expressed genes in MOL56 between timepoints, normalized by the total number of counts multiplied by 10,000 and natural log transformed
	Ctrl	Early	Peak	Late
0610009L18Rik	0.0438507898025683	0.0212647156390287	0.0699468712098803	0.0419944628476032
1110002O04Rik	0.00953324904184067	0.00126784578674665	0.000310901028810344	0.0067792098468738
1110020A21Rik	0.0499441025404716	0.0246196714830341	0.0378329439926087	0.0414415558559698
1110038B12Rik	0.084134036925326	0.19817679308221	0.0857679028383266	0.0856883646962395
1700025N23Rik	0.00100120688199227	0.00543294646144341	0.0068175933054513	0.00299311376104077
1700056E22Rik	0.00959525987521513	0.00223629147579103	0.00248450596577076	0.00849543531671611
1700063D05Rik	0.353538794649466	0.17276021570385	0.129053127189437	0.177725986027678
1700084E18Rik	0.00250114018182082	0.00684217329878851	0.0135890215891675	0.0041419301040791
2210411M09Rik	0.10756987948015	0.0601676603747674	0.0874787878779618	0.0619149769879658
2310002F09Rik	0.00187644136393479	0.0127540713034926	0.0518068865842482	0.224304734180307
2700046A07Rik	0.0128763434977758	0.0308619467292394	0.0390298473757742	0.0141950071779594
2810410L24Rik	0.247478125780723	0.146036091775042	0.337719014569817	0.402246644287461
2900052L18Rik	0.30660149827698	0.179642954695028	0.399648219031354	0.286539666935123
2900060N12Rik	0.00835431200295581	0.0041703737260642	0.00589065388807404	0.0105510254593855
4632428C04Rik	0.000438151360072585	0.00483899315279564	0.00372444798747966	0.00138255042047621
4921516A02Rik	0.0210016079309495	0.0543889564526863	0.0550493764279959	0.0257223657867208
4930426I24Rik	0.0216757426257276	0.0125330047279954	0.0117468110818374	0.0217818566692268
4930440I19Rik	0.0120725452979849	0.00335256463048135	0.00619972917221718	0.00528942818242661
4930461C15Rik	0.00729829417067824	0.0029062048853615	0.00217428008378695	0.00712269065611398
4930471L23Rik	0.0225330754870904	0.0109841688130657	0.0257844519633187	0.0289756369987958
4930563E22Rik	0.0202043169361793	0.0101719154156	0.00558148304686453	0.0170326572959954
4930587E11Rik	0.0197133601808037	0.0436595238564696	0.0731311653162316	0.0203142751349803
4930588J15Rik	0.0112681004868681	0.00580398821275001	0.0132822220845003	0.0041419301040791
4930593A02Rik	0.222232652633852	0.1164548593876	0.121095797071158	0.259870513228218
4930599N23Rik	0.0274789815884208	0.275253118185668	0.373238927357136	0.129479138726022
4933412E12Rik	0.00218883955395365	0.0978843762098315	0.0985287564978049	0.0276307392114325
4933439C10Rik	0.0170087809824447	0.00824941701020106	0.0135890215891675	0.0230219763869575
5033421B08Rik	0.290109604353206	0.186973968378444	0.186151447733223	0.348875787617043
5830418P13Rik	0.0994976782378609	0.0246924804469214	0.0260874402451107	0.0664562065161415
6820408C15Rik	0.00605449083210459	0.00238519991097406	0.00650870895834438	0.0122607953562313
8030451A03Rik	0.00100120688199227	0.00617489234313694	0.00403419341421862	0.00218815633000769
8030455M16Rik	0.00561879391602425	0.00245964581424518	0.00248450596577076	0.00723715804662571
8430426J06Rik	0.00300061840916383	0.0137114621409493	0.0120540819392426	0.0110072500096129
9030025P20Rik	0.0530956377645181	0.363033621710468	0.215655431096672	0.12185336286911
9130015G15Rik	0.00343745730141134	0.00082055432807102	0.00248450596577076	0.00345279868385671
9130227L01Rik	0.000563302210030543	0.0049875145564064	0.00928523933905549	0.00333789726196883
9330111N05Rik	0.67141627857122	0.387795771858875	0.70919368744339	0.647405770449721
9330175E14Rik	0.000250395712605652	0.0353381418450578	0.0748637887037456	0.0238103435083961
9530051G07Rik	0.0158386294045379	0.008323427640204	0.0257844519633187	0.0200883020728323
9530077C05Rik	0.118862666308815	0.318615061870317	0.311877537746984	0.1376501799272
9930111J21Rik2	0.000500728742893468	0.0114269381993077	0.265519648346812	0.15537511556656
A230009B12Rik	0.461056789891204	0.249886010008798	0.298586654154287	0.392950458179967
A2m	0.00125135205348273	0.0124593050080667	0.0221414139025314	0.00540410560213833
A330069K06Rik	0.00325026399953956	0.000671412704206344	0.00279463563750286	0.001727889568532
A330102I10Rik	0.0100292280725914	0.0041703737260642	0.0068175933054513	0.127755719188
A830052D11Rik	0.0565331437516442	0.0271648363097658	0.0360348985404642	0.0434305919538576
A930037H05Rik	0.0918168056755618	0.318940599085823	0.251110030741473	0.15646023729914
AC156546.1	0.0157153758646711	0.0373531003358092	0.0266931415419946	0.0177124968234039
AI506816	0.101705657756216	0.261271723146114	0.247717698073294	0.108185648059374
AU020206	0.00106374904129133	0.0732223364895239	0.270751579736753	0.0935938670928479
AW011738	0.00218883955395365	0.00965468316932244	0.0105167826271858	0.0165791740408871
AW112010	0.000125205693554417	0.00245964581424518	0.0414193649633259	0.00115225804890073
Abca4	0.000750999122238505	0.00513601390468548	0.00527221658948348	0.000691514140927223
Abcc4	0.00767113369812432	0.0318021653455058	0.0390298473757742	0.0550642293055389
Abhd15	0.0297301091594939	0.0708614001386401	0.263132418523733	0.0690419655501777
Ablim1	0.00281334330845474	0.00795331970229078	0.00589065388807404	0.00195804942995608
Acads	0.038804738328665	0.0186312240798229	0.0212285768961955	0.0521137662239441
Acsl5	0.00318785844447634	0.0663322720128448	0.0617953428682663	0.025047951763696
Actl6b	0.00312544899471677	0.0117957629903673	0.0166518508005335	0.001727889568532
Ada	0.0535111367243436	0.163551160371695	0.135862437997306	0.090965637623231
Adam9	0.488510486819768	0.921527448458443	1.12803506969054	0.636911356914858
Adamts17	0.00143891987738527	0.0041703737260642	0.00248450596577076	0.00287815950552318
Adamts2	0.555617576912533	0.244348759361549	0.119165538192517	0.556170239126877
Adamts9	0.00337506342752112	0.0152560829372255	0.0135890215891675	0.00494531699670801
Adamtsl3	0.0429515746398632	0.131027597052364	0.13694763775219	0.239209758032116
Adar	0.123687374264903	0.310988952008211	0.36399047102723	0.217834978986215
Afap1l2	0.0113300038372489	0.0390769820187373	0.0728421026672034	0.122465569523276
Ago4	0.0749406776952346	0.0428733924651268	0.0771692933338359	0.0977847191095346
Agpat2	0.00648999799905236	0.00275737401777921	0.0015535394501592	0.00815242577625869
Ahr	0.00717398343083787	0.0156234984041678	0.0083605855167091	0.0118051424760972
Ahrr	0.012505439995165	0.00595236637369778	0.0178743606447705	0.0241480249626221
Akr1b10	0.00287577223899034	0.00721269263314682	0.0099012005704675	0.00333789726196883
Aldh1a7	0.0179931108697444	0.00476472417819338	0.00341460658878367	0.00528942818242661
Aldh1l1	0.0277225911846645	0.0737077204578043	0.128779787960661	0.0686114697603699
Aldh1l2	0.0888424370020685	0.348656223029021	0.291642113802305	0.333796763642991
Alk	0.0765657775285612	0.184991202002907	0.374950173204824	0.0329995117977426
Alpk1	0.0019389288098367	0.017458553550824	0.00465339658951163	0.00402710784163862
Amotl1	0.00779538265604508	0.127814810841181	0.0438031863650088	0.0454156796393822
Angptl1	0.000500728742893468	0.00312940966254898	0.0043438429284359	0.00322298263622704
Angptl4	0.000312984845418912	0.00446759310868563	0.000621705428212378	0.000230557850147138
Ankrd13a	0.605500584278897	1.03243710545126	1.22603197838744	0.796685934024434
Ano3	0.00661439378942288	0.0231623778558124	0.00589065388807404	0.0232472875637674
Apba2	0.00754686930048163	0.0285437892363357	0.0441007648786081	0.111181792767283
Apobec3	0.00168895559472722	0.0438738161136118	0.0269958546681945	0.00803806311211297
Apoe	2.82638275390658	1.85257850802383	1.64277984393263	3.56057908104557
Apol9a	0	0.0095807710044655	0.0363347973838338	0.00333789726196883
Apol9b	0	0.00995027721077957	0.0233572351554127	0.00287815950552318
Aqp4	0.0290005688338819	0.0659131626484632	0.118889482517291	0.0612645431392234
Arfgef3	0.0194677913840702	0.0565775161254033	0.127138181726084	0.0574618905558835
Arhgap26	0.0296693344564349	0.0135642308898727	0.0254813718518038	0.0300950051204996
Arhgap27	0.00281334330845474	0.0163579246035027	0.033933084553472	0.00620647952562365
Arhgap27os2	0.000375570061077796	0.0103196469326874	0.0351346619965445	0.000691514140927223
Arhgap28	0.00499604026554771	0.0274553002514143	0.00527221658948348	0.0190707909019459
Arid5a	0.0529175139193473	0.1558542017146	0.0817644175519003	0.0578972120000263
Armcx6	0.0474992906138398	0.0187044703484746	0.0120540819392426	0.037007259898434
Arrb1	0.00586778682658396	0.0393640069318726	0.0227495093066256	0.037007259898434
Arrdc2	0.311473567066467	0.673474725130511	0.753778765788765	0.349363687208856
Arrdc4	0.00599226003667133	0.0275279030560373	0.0154278445964762	0.0203142751349803
Atf3	0.00555653600007356	0.095920081380232	0.00866889846554805	0.047506783719754
Atp10a	0.000438151360072585	0.00327818517415999	0.000932413258253129	0.00184297612093925
Atp8a2	0.0414510835027634	0.174203256091996	0.159999040371311	0.106736014161588
Atp8b5	0.0157770045335339	0.0333912934341412	0.0588679040590619	0.11014965314071
B230206H07Rik	0.210432638308585	0.0967333610560923	0.242607523633665	0.246714916298432
B230209E15Rik	0.0902735262056901	0.035698253761937	0.0348344029638257	0.090965637623231
B2m	0.279182960553991	1.38802386647853	3.26862583552614	2.70980436993376
B3galnt1	0.0127527242817653	0.113727809773362	0.194377804657616	0.0402240833166163
B4galt5	0.00611671775510694	0.0165781473250262	0.007126382272479	0.0145359506570956
B4galt6	0.0572428789736178	0.14622953317592	0.0928773599777384	0.050141943470801
BC055402	0.00636558673244398	0.016651544122842	0.0105167826271858	0.00620647952562365
BE692007	0	0.0021618289422282	0.0172632925389303	0.00333789726196883
Bace2	0.00137640117841279	0.00847143246951654	0.0345340537485413	0.0268453793991566
Baiap2	0.00940921583786896	0.0255657747749525	0.0172632925389303	0.0196362026993424
Bambi	0.00424822359820252	0.0154030653236942	0.0135890215891675	0.0104369367924021
Batf2	0.015098880190777	0.0325248093671291	0.0693668176738183	0.0343372132968816
Baz1a	0.0250396160393369	0.0755085153247176	0.0260874402451107	0.0747286075113808
Bcat1	0.474858378907572	0.994988137496329	1.25001446700191	0.581496951080933
Bcl3	0.00779538265604508	0.228441811186159	0.168967810429001	0.137348736387176
Bcl6	0.184065569147143	0.362202758097249	0.333940776978424	0.275659693999171
Bdkrb2	0.0943266875801579	0.0425158556138924	0.0420158532695457	0.0966339845393702
Becn1	0.295388704099297	0.574932579316775	0.473384414707708	0.323838681293865
Bfsp1	0.0159002504781511	0.00661979578366636	0.0187902632405266	0.0203142751349803
Bfsp2	0.766555685594836	0.311644902199984	0.329924669420409	0.864355615214433
Bid	0.00561879391602425	0.017825160834639	0.0327300615849628	0.0253852156294916
Bmf	0.0342172183779166	0.0126066990166757	0.02911228464186	0.0578972120000263
Bmp6	0.00996724414494205	0.00260852099627255	0.00248450596577076	0.00872404299692943
Brip1	0.00137640117841279	0.0270922071397356	0.010824431610862	0.00815242577625869
Bst2	0.012505439995165	0.584087559771417	0.761794598123519	0.277146343398643
Btbd11	0.00984326476243055	0.0041703737260642	0.00650870895834438	0.0217818566692268
C030029H02Rik	1.74525718804459	1.11552935697754	0.618279576829589	1.64057392419348
C1ql2	0.00100120688199227	0.015843882904607	0.00279463563750286	0.0057480589769172
C1ql3	0.200030598270825	0.372899112420868	0.216156563955549	0.0895962235315335
C1qtnf1	0.000500728742893468	0.00987638689149648	0.00619972917221718	0.00299311376104077
C1ra	0.000312984845418912	0.0214838605385566	0.0251781998548855	0.00632105183448125
C230035I16Rik	0.00325026399953956	0.0242555471251842	0.0309228091512705	0.00803806311211297
C230079O03Rik	0.0216757426257276	0.00565558803245638	0.00372444798747966	0.0136265096022135
C4b	0.222583508471316	1.09186961440266	2.30119669532222	1.84374440977087
C77080	0.0244288437504249	0.00898927693490734	0.0126683405528866	0.0393377168208507
Cacng5	0.0023762316342321	0.165007541459684	0.0461813386736437	0.0299831246758259
Cadps2	0.0942127385980135	0.412503115509755	0.706742689942311	0.439110934575842
Cage1	0.0219820173174987	0.0120907249116685	0.0187902632405266	0.0325532133477768
Capn1	0.000500728742893468	0.00379872522746754	0.00959326738079057	0.00368256192820544
Carmil1	0.0149755354348433	0.0828855327797515	0.0854824705333242	0.0360068276838915
Casp12	0.000250395712605652	0.00245964581424518	0.00589065388807404	0.0265086077173493
Casp4	0.000563302210030543	0.0123855998560889	0.00341460658878367	0.00986629813241247
Casp7	0.0119488266709764	0.135860078811079	0.0988104896782326	0.0470669145187632
Casq1	0.0486926285059277	0.113861009262718	0.137218753781561	0.0291996108843772
Casz1	0.00268847375405276	0.0143737346489863	0.0230534183973568	0.00689371655923926
Cbarp	0.0152222097346581	0.00787928167428234	0.00341460658878367	0.0163523552723628
Ccl2	0.00100120688199227	0.0458003827754615	0.00465339658951163	0.00299311376104077
Ccl7	6.26048063354194e-05	0.00965468316932244	0.00124302457892367	0
Ccl8	0.000187802662147642	0.0106150445091753	0.0393288495151794	0.0066646900212196
Ccrl2	0.00150143466801437	0.0105412032952501	0.00650870895834438	0.00356768690492462
Cd274	0.00331266566039249	0.832776266679306	0.860280607981254	0.236938085593417
Cd300e	0.0088508759613317	0.00372437895016031	0.0117468110818374	0.0135127712940335
Cd38	0.00168895559472722	0.00780523816423843	0.00372444798747966	0.00506003388272924
Cd59a	0.100630584411184	0.26385443256209	0.180975396077042	0.121138647748371
Cd59b	0.00624115998574642	0.0135642308898727	0.0099012005704675	0.0123746761430998
Cdca7l	0.000375570061077796	0.00223629147579103	0.0015535394501592	0.00425673918388128
Cdh22	0.00779538265604508	0.145778111685211	0.308000200465842	0.0398917879417409
Cdh24	0.0023762316342321	0.0172385246507539	0.00897711638681007	0.00333789726196883
Cdh8	0.181980140343294	0.0674490389972524	0.0390298473757742	0.178111989079482
Cdk6	0.00181395001310797	0.05855017118142	0.0129753284250096	0.00769489662581566
Cdkn1a	0.0262600426267297	1.03562130834407	0.762084875669641	0.141260432441702
Ceacam1	0.0132471094819828	0.0301380996148472	0.0342336142965026	0.0103228351077096
Cebpa	0.000500728742893468	0.0154030653236942	0.0068175933054513	0.00149767672135069
Cebpb	0.00312544899471677	0.198238001685519	0.252801891342182	0.109219815756502
Cebpd	0.129149392169706	0.760872684994298	0.381978270984051	0.231007472151645
Cela1	0.0721486332378859	0.206102662191142	0.16554806629527	0.317983673867601
Cemip	0.000375570061077796	0.00699039750708794	0.000621705428212378	0.000345816844438308
Cenpj	0.0738364253955393	0.171315089940499	0.193865635206019	0.12083218482607
Cers1	0.013494210456018	0.0344012435039453	0.0553436275546806	0.0577883994037728
Cers6	0.0023762316342321	0.00950685337619662	0.00558148304686453	0.0057480589769172
Cfap410	0.0210629116858942	0.0389334386625193	0.074575226529999	0.0286395820842607
Cgas	0.00568104795616814	0.0136378492250412	0.00774367430178797	0.0092953336580114
Chil1	0.00648999799905236	0.023381107332113	0.0834821599326108	0.00986629813241247
Chl1	0.00568104795616814	0.0439452366625025	0.0306212826136105	0.0507996498258926
Chrnb2	0.00698748834159888	0.0149620533369411	0.0218372274767378	0.00895259842761571
Chst2	0.13840505902659	0.315680448224273	0.450065833620937	0.176953532641226
Chst4	0.010153184403059	0.00342693855491064	0.00279463563750286	0.00609189408844793
Ciita	0.00275091048030445	0.015109078943759	0.0318268436382309	0.00849543531671611
Cklf	0.069932722794619	0.0340406641309159	0.0248749359168329	0.0576795749660497
Clca3a1	0.00218883955395365	0.0175318857604474	0.0239645918977967	0.0163523552723628
Clcf1	0	0.00126784578674665	0.00186395793183908	0.00126741086401051
Cldn14	0.313900728881492	0.865182813643008	1.13625405428169	0.775145392916131
Clec2d	0.000187802662147642	0.0211185923545246	0.0105167826271858	0.00276319203400549
Clrn1	0.0103390900938236	0.00469044968730084	0.00372444798747966	0.00849543531671611
Cmpk2	0.00262603312921287	0.304735871130268	0.279489472056365	0.0855825346512555
Cnih3	0.014543708939964	0.0049875145564064	0.00465339658951163	0.0187313903084137
Cnksr2	0.288890990220666	0.149448059696493	0.0814778400682861	0.284199595080142
Cntn3	0.262276883276023	0.524372992349534	1.08621014303035	0.670549411547715
Col16a1	0.0731383741023673	0.390576982626582	0.287218829415495	0.283852451579467
Col23a1	0.00617894080616027	0.0241098602496983	0.0272984761868878	0.0465168057896555
Col5a3	0.00754686930048163	0.0278908380326863	0.0473682973317965	0.00883832724197067
Col7a1	0.00325026399953956	0.00898927693490734	0.00496285445677084	0.0290876302121242
Col9a1	0.0516103020154968	0.0273826921752413	0.0169576184023561	0.0589846872481951
Cox6a2	0.00412353309934163	0.0140058596279319	0.0187902632405266	0.00826677536308101
Cox6b2	0.0341567157749098	0.0113531569144785	0.0187902632405266	0.0491545721431101
Cpne8	0.00574329812098778	0.0219220063167516	0.00805217748167867	0.0426575479581482
Creg2	0.0831551246034986	0.0391487459708251	0.043207763547065	0.0596366052002491
Crip2	0.0227166940831389	0.0815795625500351	0.146393234775894	0.0486056109696984
Crtac1	0.165774986095439	0.0624137367689424	0.0411209873327745	0.327501502282466
Crybg1	0.00399882705082131	0.0106888802709782	0.00805217748167867	0.00299311376104077
Csf1	0.373128729528555	0.726283206376749	1.00991176863326	0.65168105359392
Csmd2os	0.0238788295568881	0.0114269381993077	0.00558148304686453	0.010893213383776
Csrnp1	0.0422316198723194	0.11705248592767	0.0488500171692652	0.0665640800722574
Csrp2	0.0203270184719952	0.00965468316932244	0.00496285445677084	0.0189576701694816
Csta2	0.000250395712605652	0.00587818004523372	0.00310466915864005	0.00735161233585361
Cstb	0.528272194361356	0.848615849983395	0.595227543348489	0.554979574785763
Cthrc1	0.00143891987738527	0.00824941701020106	0.000932413258253129	0.00264821134344851
Ctsc	0.00100120688199227	0.0123855998560889	0.00465339658951163	0.00195804942995608
Cxcl10	0.000312984845418912	0.0359862499545443	0.0123612584102694	0.00425673918388128
Cxcl14	0.020020236398461	0.040511283460104	0.053871505318924	0.0333341049704234
Cxcr4	0.00816803692983123	0.00134237491584284	0.000621705428212378	0.00437153508407177
D730045B01Rik	0.040730047248738	0.0215568981675901	0.0345340537485413	0.0241480249626221
Dagla	0.00200141235130169	0.00906323282968661	0.00310466915864005	0.0152174890860356
Dapk1	0.00312544899471677	0.010762710581464	0.00650870895834438	0.00883832724197067
Dbil5	0.0480961375667888	0.0235269004082877	0.0197053277262864	0.0446441692732078
Dclk3	0.0539264631164827	0.0248380824731901	0.0288102116059762	0.0217818566692268
Dcp2	0.104078042359387	0.21787490991061	0.202029033935895	0.155276409723464
Dct	0.0452280178396962	0.0161376533732491	0.0151216088097394	0.0592020404575238
Ddah2	0.0479171208816872	0.0221410072374745	0.024571579981864	0.0780398290251307
Ddx4	0.00268847375405276	0.000745986296541676	0.00897711638681007	0.0152174890860356
Ddx58	0.0129999474339645	0.323918944788319	0.276899686136172	0.144757948401322
Ddx60	0.00474683017457625	0.344751837942351	0.886633936104747	0.52180493600499
Defb47	0.0115156908995629	0.0204607732143079	0.0215329484934071	0.010094592673312
Depdc1b	0.076681755093875	0.0315129614534028	0.0565197669877295	0.124605346096311
Deptor	0.0438507898025683	0.0223599602072953	0.0285080472944007	0.0704397983308848
Dgkg	0.0153455240702384	0.00699039750708794	0.00248450596577076	0.00551876987244738
Dhx58	0.00143891987738527	0.0219950119528337	0.0354348309008378	0.0106651011116298
Dnah8	0.0888997199093887	0.0325248093671291	0.033933084553472	0.0605051685561535
Dock2	0.0313696315283625	0.185797175045474	0.196679326541551	0.0223457381055438
Dock7	0.00673877410740541	0.0400812089945405	0.118889482517291	0.0903338333667566
Dok7	0.0100292280725914	0.0465842174323041	0.09457613497805	0.0197492467060815
Dse	0.0593100675065903	0.0276005005898758	0.0221414139025314	0.0394485556073348
Dtx3l	0.00368699387430265	0.306714755699361	0.324994088261051	0.114785915146321
Dtx4	0.0988173179529221	0.0372812074006926	0.0372339546553679	0.0676421760975685
Dusp23	0.0947823537093998	0.0438023904634619	0.0257844519633187	0.0563727571396661
Dzip1	0.0857442770641263	0.0366339382919523	0.0751522676333847	0.145455986071345
E230001N04Rik	0.00536973899255393	0.0331025488253971	0.0676246355565411	0.0103228351077096
Ecm1	0.00742258945927931	0.0195098254113124	0.0120540819392426	0.0195231459122111
Eef1akmt4	0.0128763434977758	0.0484344788248842	0.0318268436382309	0.0113492818817667
Efhd2	0.00543200853882117	0.0176052125928521	0.0266931415419946	0.0106651011116298
Efnb1	0.0263210248757611	0.0109841688130657	0.00866889846554805	0.0198622779353175
Efs	0.0232061789037242	0.0095807710044655	0.00897711638681007	0.0378956935235577
Egr1	0.0299731710428178	0.169489993144008	0.0288102116059762	0.119912232138749
Egr2	0.00947123436288427	0.0540355139480297	0.00619972917221718	0.0328879558572034
Eif1a	0.102836066667167	0.22045229695083	0.117784497117324	0.10611409861581
Eif2ak2	0.0194063897612244	0.404019479477263	0.404432461619806	0.171917988809307
Eif4e3	0.0826364886930316	0.167977045105302	0.158142501306943	0.11868431058678
Elf4	0.00143891987738527	0.0245468572176155	0.0285080472944007	0.0539724799555239
Emp3	0.00374936828928594	0.0385026849242715	0.0148152792139172	0.0539724799555239
Enc1	0.012010687897768	0.0386462901212055	0.0294142664571794	0.00689371655923926
Endod1	0.953044027771006	1.6147180921683	1.47257062402188	1.33793625125053
Endou	0.00100120688199227	0.00684217329878851	0.00589065388807404	0.00195804942995608
Enpp1	0.433315276289858	0.224395408388564	0.155750446695553	0.271538006474163
Epha4	0.521716910196903	0.293503262531056	0.352034996442662	0.694609601259618
Ephb2	0.192209099457861	0.0424443329011736	0.120820273814247	0.253538054714413
Ephx1	0.0459458193379357	0.0205338856027185	0.0635477014138699	0.11786485775613
Eps8	0.0139882293028183	0.0474386096502544	0.0200101632398623	0.0194100763417974
Eps8l2	0.0479767966709	0.0159173336128906	0.0348344029638257	0.0408883429890666
Erap1	0.0856293458599509	0.340407476958611	0.389378730393246	0.251836629696665
Ermard	0.232556308513401	0.768583982373321	0.562814639528333	0.481241229207469
Etv6	0.272864714131893	0.670921814957056	0.431657795097437	0.40923908198005
Eva1b	0.000500728742893468	0.00253408617573634	0.00465339658951163	0.00115225804890073
Eva1c	0.0233285126812511	0.0737077204578043	0.0806176145277736	0.0794251493821744
Eya1	0.0141116958904009	0.00721269263314682	0.00743507591831391	0.0209918880999271
Eya2	0.116747996420165	0.0509198214544005	0.033933084553472	0.0712990329400139
F830016B08Rik	6.26048063354194e-05	0.180328630284926	0.709652581434038	0.23684711126972
Fam107a	0.0249785555946373	0.206527662600986	0.342145800739311	0.0343372132968816
Fam111a	0.0021263677228724	0.0112793701855697	0.00217428008378695	0.00299311376104077
Fam124a	0.00406118201903129	0.0148885324265392	0.0375334941725159	0.0304305713707175
Fam13a	0.0781882406966843	0.228501195116146	0.738740794641215	0.340216743531628
Fam13c	1.4930888742308	0.876956998140619	1.49680576753187	1.92034242030145
Fam241b	0.0088508759613317	0.00372437895016031	0.00403419341421862	0.0103228351077096
Fam43a	0.00971927000712583	0.0254202786713216	0.0632558548204922	0.0183918744830077
Fam49a	0.00748473131056533	0.0238184228092645	0.0366346063148511	0.0224584762473723
Fap	0.000438151360072585	0.0119432548263348	0.0254813718518038	0.00700821016131874
Far2os1	0.00118882162654743	0.00528449120418231	0.00496285445677084	0.00437153508407177
Far2os2	0.000938660810926858	0.00639736880578537	0.010824431610862	0.00620647952562365
Fas	0.000375570061077796	0.00350130694827066	0.00248450596577076	0.0016127897696857
Fat4	0.00412353309934163	0.0173852159631932	0.0565197669877295	0.0146495726567093
Fbln2	0.000375570061077796	0.00327818517415999	0.0209241126287077	0.01408133351503
Fbn2	0.599433980167044	0.21601266416767	0.0900396395616997	0.491237687879172
Fbxl21	0.024001081079217	0.00921112821284424	0.019400399259684	0.0234725479868861
Fchsd1	0.010153184403059	0.00513601390468548	0.00527221658948348	0.0136265096022135
Fcnaos	0.0131853246968434	0.00201288723903117	0.00527221658948348	0.0384505639824809
Fga	6.26048063354194e-05	0.110792923266539	0.000310901028810344	0.000345816844438308
Fgfr4	0.00331266566039249	0.0346896134190244	0.0336324644651627	0.0200883020728323
Fgfrl1	0.166782291022787	0.459121767364743	0.224637622210852	0.226145573478332
Fgl2	0.00137640117841279	0.11286158035976	0.250626115786566	0.161966310947954
Fhod3	0.00624115998574642	0.026874287974302	0.00619972917221718	0.01408133351503
Fkbp5	0.113064486750149	0.722014653733438	0.989891555632499	0.401012134573354
Flnc	0.0204497049539912	0.0881607559895335	0.0760172054375936	0.125215870797643
Fmnl3	0.0179316186295384	0.00572979087542988	0.00619972917221718	0.0214433751224065
Fndc10	0.0210016079309495	0.0103196469326874	0.0123612584102694	0.0297593262277733
Folr2	0.00168895559472722	0.0103196469326874	0.00403419341421862	0.00506003388272924
Fosl1	0.000375570061077796	0.0095807710044655	0.00124302457892367	0.00115225804890073
Fosl2	0.00443523019936365	0.0378562062129906	0.0473682973317965	0.0502515912411549
Frrs1	0.00673877410740541	0.0203876554800851	0.0221414139025314	0.0170326572959954
Fstl3	0.00779538265604508	0.00327818517415999	0.007126382272479	0.00883832724197067
Fut9	0.0675363521359589	0.0289063557663704	0.051216211733777	0.162456453577016
Fxyd3	0.00698748834159888	0.0164313375661476	0.036934325387413	0.0182786769205963
G630055G22Rik	0.00137640117841279	0.000149241785594997	0.000310901028810344	0.0016127897696857
Gabra3	0.181719155686901	0.0491452072415198	0.0381323041693498	0.0995605265564279
Gabrb3	0.0150372097145513	0.0326692755268542	0.0438031863650088	0.0118051424760972
Gadd45a	0.0817714973202957	0.160441344504143	0.138302483457328	0.142660907081308
Gadd45b	0.14730572242809	0.356524054268426	0.261457960333293	0.373380688838599
Gadd45g	0.0104630080232616	0.181823019822517	0.0381323041693498	0.112728007491468
Gale	0.0178701226078043	0.0366339382919523	0.0574009646581037	0.0229093017587702
Galnt17	0.139385840449573	0.615788047725361	1.0004664182372	0.348713101506316
Galnt3	0.000750999122238505	0.00335256463048135	0.00341460658878367	0.00103709197209299
Gap43	0.0109585262415424	0.0373531003358092	0.0157339866315652	0.0406669721213988
Gbp10	0	0.008323427640204	0.089755424120732	0.0124885439626114
Gbp2	0.000187802662147642	0.679658456630256	0.617105957842657	0.239209758032116
Gbp3	0.00250114018182082	0.930160917411679	0.94232527092067	0.231739294685332
Gbp4	0.00100120688199227	0.0495003821139663	0.426190487509537	0.110562636837595
Gbp5	0.000876110827605746	0.0820609079300922	0.0914595063515262	0.0437617136730868
Gbp6	0.0189764728044237	0.310332571263348	0.581762715449474	0.149733274876954
Gbp7	0.0019389288098367	0.956168052491009	1.26135310204288	0.517004031073827
Gbp8	0.00100120688199227	0.0275279030560373	0.116678289373827	0.0520043224580938
Gbp9	6.26048063354194e-05	0.0499264255109702	0.178377288640025	0.0724792763412489
Gdf11	0.00816803692983123	0.0180450607098348	0.0117468110818374	0.0245980895966866
Gdnf	0.000250395712605652	0.00483899315279564	0.00279463563750286	0.00402710784163862
Gfap	0.0913026437748223	0.300379544313075	0.601040561237406	0.159315381386626
Ggta1	0.000500728742893468	0.0545302984839158	0.0682057002385018	0.023697757679174
Gli2	0.0422316198723194	0.292445448597119	0.586790066361561	0.111903657168048
Glis3	0.000938660810926858	0.0304277013381944	0.00866889846554805	0.0190707909019459
Gm10550	0.0238788295568881	0.0120169925874299	0.0145088557515188	0.0139676469289299
Gm10687	0.139712553944268	0.0498554308820106	0.036934325387413	0.213001632564268
Gm10863	0.667473613775548	0.37991594013412	0.928782628411321	1.19457527220416
Gm11772	0.00112628728931333	0.0118695116275813	0.0184850555744051	0.00437153508407177
Gm12092	0.0497058472518418	0.0173118729967662	0.0529871906241519	0.116326571436707
Gm12185	0.000563302210030543	0.0955131933738093	0.473578083381148	0.0358956067419857
Gm12198	0.0123817749170145	0.0029062048853615	0.000310901028810344	0.00723715804662571
Gm12216	0.00300061840916383	0.241128912523951	0.272884050679555	0.0948529678678857
Gm12367	0.00543200853882117	0.0018639233488986	0.0068175933054513	0.00563342099636896
Gm12522	0.0464838325381546	0.0208262817138691	0.0461813386736437	0.0577883994037728
Gm12530	0.0427716345360399	0.0939519205011484	0.0506251877803102	0.0506900621357682
Gm12828	0.106838729663081	0.0593944049946573	0.0725529564367993	0.0618066007217201
Gm12976	0.0238788295568881	0.00965468316932244	0.0135890215891675	0.037007259898434
Gm13031	0.0154071755360878	0.0067680529549186	0.0175688732673784	0.0278550144878457
Gm13052	0.0143585833429799	0.121820683957011	0.313015075832987	0.0493740722599149
Gm13327	0.0170703299944501	0.00528449120418231	0.0254813718518038	0.00952375856931216
Gm14168	0.00586778682658396	0.013490607134646	0.0129753284250096	0.00803806311211297
Gm15398	0.0509560547035167	0.0206069926460985	0.00805217748167867	0.0138539474167205
Gm15462	0.0131853246968434	0.0029062048853615	0.00558148304686453	0.0066646900212196
Gm15496	0.000876110827605746	0.00424468685394493	0.0135890215891675	0.0164657710874691
Gm15687	0.00250114018182082	0.00647151662896604	0.00341460658878367	0.0041419301040791
Gm15704	0.00599226003667133	0.00238519991097406	0.00217428008378695	0.00918110163265333
Gm15912	0.28022424696421	0.116388434386576	0.228356520090392	0.358669382546781
Gm15943	0.013926490292057	0.00350130694827066	0.0157339866315652	0.0368961501760801
Gm15972	0.0269915842867088	0.0119432548263348	0.0405239648511456	0.0259470694246351
Gm16156	0.00474683017457625	0.00972858987157503	0.00928523933905549	0.00895259842761571
Gm16174	0.00175145475686817	0.0100980414720248	0.0187902632405266	0.0116911968081169
Gm16175	0.00281334330845474	0.04779439107289	0.0230534183973568	0.0216690422164477
Gm16240	0.0175010670392555	0.00928506770284007	0.0138957269967669	0.0104369367924021
Gm16252	0.0175625857599291	0.00639736880578537	0.00619972917221718	0.0112352842556438
Gm16316	0.0146054098571894	0.02955864443917	0.0181797547281242	0.00986629813241247
Gm16337	0.0173164881666567	0.00802735224907545	0.0132822220845003	0.00826677536308101
Gm16537	0.00593002536832515	0.0131960578971905	0.0251781998548855	0.00769489662581566
Gm16675	0.00909906550520758	0.0266563213097547	0.0544606142959937	0.0113492818817667
Gm17089	0.00374936828928594	0.012680387874908	0.0043438429284359	0.00218815633000769
Gm17473	0.00343745730141134	0.0124593050080667	0.0099012005704675	0.0110072500096129
Gm19684	0	0.00654565895465466	0.0366346063148511	0.0216690422164477
Gm19744	0.000500728742893468	0.00839743279303896	0.000621705428212378	0.00425673918388128
Gm20219	0.00916110326767551	0.0181183499237782	0.0151216088097394	0.0183918744830077
Gm20515	0.114293831505884	0.0407978970470369	0.0476648169908354	0.0972618220913365
Gm20559	0.00574329812098778	0.138657452193724	0.23304735659501	0.102374461027338
Gm20597	0.0133088904499984	0.00469044968730084	0.007126382272479	0.0112352842556438
Gm2115	0.0657792647887159	0.0280359751492724	0.0446956563785763	0.0423260603631077
Gm26658	0.000250395712605652	0.00201288723903117	0.00124302457892367	0.00620647952562365
Gm26724	0.0862613040818888	0.0492872923287595	0.0315255896088264	0.0356731277409999
Gm26797	0.00617894080616027	0.0218489953504574	0.0142023383650009	0.00860974568950669
Gm27200	0.104134459166092	0.0590427275183255	0.0417176535912226	0.0436513519486281
Gm27252	0.0112681004868681	0.0247652841100495	0.0282057916519565	0.00586268381710523
Gm28836	0.0230838301588131	0.0109103548517031	0.0282057916519565	0.0276307392114325
Gm28905	0.00368699387430265	0.00111877086271084	0.00310466915864005	0.0203142751349803
Gm29502	0.118473457712589	0.0541062124433958	0.0212285768961955	0.0705472430406121
Gm29675	0.00362461556850902	0.008323427640204	0.0114394457800317	0.0057480589769172
Gm30541	0.0133706676013618	0.00684217329878851	0.0083605855167091	0.00746605352679632
Gm30655	0.0201429605219345	0.00802735224907545	0.0099012005704675	0.0191838988395574
Gm31152	0.035245202957609	0.0159173336128906	0.0375334941725159	0.0611560963546321
Gm31641	0.000813556931539477	0.00587818004523372	0.00558148304686453	0.00126741086401051
Gm32005	0.00673877410740541	0.0292687908895586	0.0494420909120552	0.0430993605567177
Gm32122	0.00337506342752112	0.0142266008800099	0.033933084553472	0.0206531390123689
Gm32509	0.0310055254528378	0.0124593050080667	0.0105167826271858	0.00918110163265333
Gm32568	0.00953324904184067	0.0773060731578388	0.0178743606447705	0.0120329948686074
Gm32786	0.00512062202527607	0.0021618289422282	0.00310466915864005	0.00792368736765239
Gm33819	0.0133088904499984	0.00312940966254898	0.0015535394501592	0.00872404299692943
Gm33979	0.0400084907262781	0.0157704268009204	0.0203149058570654	0.0464067477201556
Gm3417	0.00661439378942288	0.169867872765959	0.036934325387413	0.0214433751224065
Gm34299	0.0351243184296569	0.00987638689149648	0.00589065388807404	0.0262840302378771
Gm3435	0.0233896739583898	0.111527452809308	0.0834821599326108	0.0509092255078712
Gm3448	0.0529768920598189	0.24551704708029	0.119441517682038	0.0901231432108697
Gm34590	0.114628845224618	0.0497844312124559	0.0559318701841908	0.134127671884928
Gm35455	0.0021263677228724	0.012680387874908	0.0135890215891675	0.00940955263590428
Gm36043	0.000750999122238505	0.0669606068946119	0.0757289759523564	0.00872404299692943
Gm36107	0	0.00201288723903117	0.000310901028810344	0.001727889568532
Gm36569	0.0169472281819252	0.00817540090221934	0.0102090389664845	0.00609189408844793
Gm36608	0.0193449843679878	0.00847143246951654	0.0102090389664845	0.0189576701694816
Gm36849	0.0210629116858942	0.00669392711681608	0.00186395793183908	0.039559382109944
Gm39121	0.0346406341341409	0.0154030653236942	0.0181797547281242	0.0391160023853627
Gm39129	0.0201429605219345	0.00454188415336674	0.00527221658948348	0.0138539474167205
Gm40841	0.011144282288846	0.00439329654443514	0.00341460658878367	0.0558277452789803
Gm41505	0.000563302210030543	0.00461616967929852	0.00186395793183908	0.000921912630532333
Gm41804	0.00847847611094081	0.00238519991097406	0.00866889846554805	0.0067792098468738
Gm4189	0.012505439995165	0.00632321548429732	0.0135890215891675	0.0128300696465276
Gm42047	0.0019389288098367	0.023381107332113	0.0117468110818374	0.0057480589769172
Gm4221	0.446260981492331	0.227788355104506	0.255213880458249	0.615274713939319
Gm42413	0.984340232597292	0.534131709362003	0.336831300896278	0.589649460147971
Gm43091	0.00112628728931333	0.0214108175746381	0.153619361673556	0.010094592673312
Gm43154	0.00137640117841279	0.00869339864890854	0.00650870895834438	0.00218815633000769
Gm43464	0.000312984845418912	0.00713859974822746	0.00186395793183908	0.00287815950552318
Gm43666	0.012319936642572	0.00506176698705299	0.0175688732673784	0.0298712317125178
Gm44148	0.0433113577413082	0.129783047738628	0.199994423349987	0.110459406901855
Gm44421	0.0229614664428549	0.0543182779447768	0.0473682973317965	0.0283034141988544
Gm44658	0.00399882705082131	0.00921112821284424	0.00774367430178797	0.0263963252819937
Gm44662	0.167629761515924	0.0891169048524063	0.115293806648565	0.151716495011121
Gm44850	0.0106488561303249	0.0413708778965185	0.0435055192720778	0.00860974568950669
Gm44992	0.033733095027026	0.014447293416141	0.00805217748167867	0.00952375856931216
Gm45356	0.254395293740342	0.484035080800368	0.626290357127675	0.272679748347186
Gm45418	6.26048063354194e-05	0.00372437895016031	0.0154278445964762	0.00345279868385671
Gm45716	0.00356223337141962	0.0143737346489863	0.019400399259684	0.00391227239353217
Gm46519	0.000125205693554417	0.00342693855491064	0.00558148304686453	0.00276319203400549
Gm46658	0.00462220183559448	0.00164043589873301	0.00558148304686453	0.00597729551994513
Gm47043	0.00181395001310797	0.00750900928746778	0.00619972917221718	0.00494531699670801
Gm47316	6.26048063354194e-05	0.00921112821284424	0.00186395793183908	0.00333789726196883
Gm47863	0.0381420563443728	0.018997401784709	0.0221414139025314	0.0280792394761375
Gm48021	0.0110204487579793	0.00521025531012245	0.00928523933905549	0.00883832724197067
Gm48022	0.00816803692983123	0.0029062048853615	0.00465339658951163	0.0066646900212196
Gm48091	0.0692319402342057	0.0388616592569101	0.0175688732673784	0.0218946583963409
Gm4841	0.000375570061077796	0.0320912856228987	0.0817644175519003	0.0169193057601733
Gm49012	0.0494079482922583	0.028326186203379	0.0638394628576636	0.0700099040110942
Gm49463	0.0147904897701342	0.0076571346947965	0.0129753284250096	0.0110072500096129
Gm49494	0.0108346697042871	0.00454188415336674	0.0105167826271858	0.0104369367924021
Gm4951	0.000563302210030543	0.302091252068192	1.63128543509225	0.619379040976006
Gm50237	6.26048063354194e-05	0.0225788652472073	0.231074948797563	0.0454156796393822
Gm50321	0.0173164881666567	0.00758307473377418	0.0099012005704675	0.0200883020728323
Gm5087	0.0956930635456748	0.0423012721274112	0.0151216088097394	0.256753890101729
Gm536	0.0636079297660859	0.0172385246507539	0.0215329484934071	0.109736498817822
Gm597	0.0217982637591683	0.00980249111203064	0.00310466915864005	0.0041419301040791
Gm6034	0.00281334330845474	0.0176052125928521	0.0565197669877295	0.0198622779353175
Gm7030	0.000250395712605652	0.00260852099627255	0.0184850555744051	0.00986629813241247
Gm7347	0.0210016079309495	0.0117220089138908	0.0099012005704675	0.00975213131458861
Gm816	0.377129902605227	0.162663627945922	0.118337142441392	0.315632038345426
Gm8369	6.26048063354194e-05	0.00327818517415999	0.0169576184023561	0.00195804942995608
Gnmt	0.00505833308548875	0.0102457839022189	0.00310466915864005	0.00826677536308101
Gpd1	0.389292795424018	1.00210891768533	1.08105465598652	0.507887701877809
Gpr146	0.03934660623098	0.0808915241268269	0.0880484330360572	0.0490448040144504
Gpr149	0.00143891987738527	0.000149241785594997	0.000621705428212378	0.00103709197209299
Gpr151	6.26048063354194e-05	0.0139322683810888	0.000621705428212378	0.000921912630532333
Gpr158	0.339192562512279	0.151502493575749	0.674479100658527	0.47135973472211
Gpr45	0.00717398343083787	0.00275737401777921	0.00774367430178797	0.0166925641355334
Gpr50	0.000938660810926858	0.00543294646144341	0.00217428008378695	0.000115285569688837
Gprasp2	0.0155921071314966	0.00491325661192693	0.00186395793183908	0.0116911968081169
Gpx3	0.00349984728254893	0.0165047451397251	0.0297161571070117	0.00712269065611398
Greb1l	0.00343745730141134	0.0264383071253825	0.0375334941725159	0.020766068125473
Gria3	0.00847847611094081	0.0621332529555282	0.0837681636805803	0.0308778179466035
Grid1	0.116580858186512	0.0433737293952986	0.0381323041693498	0.101853959095585
Gsap	0.00480913851996746	0.0175318857604474	0.00928523933905549	0.0102087204023369
Gsdma	0.000125205693554417	0.00253408617573634	0.00310466915864005	0.0066646900212196
Gsta3	0.0492887638557215	0.024401212779096	0.0449929694702101	0.0799574543149709
Gtsf2	0.00243868785829462	0.00972858987157503	0.00650870895834438	0.0121469015990521
Gucy1a1	0.0235119852917056	0.0108365354414373	0.00650870895834438	0.0161254850454128
H2-Ab1	0.00100120688199227	0.00402173090092757	0.042313964051329	0.0149903612163278
H2-D1	0.295435297613688	0.735839224857649	2.79940739679239	2.61580506096326
H2-K1	0.245423000198654	0.667443959031057	2.10958381701927	1.52467673312879
H2-M3	0.00112628728931333	0.0257839792460045	0.110572175956204	0.0753703453594375
H2-Q4	0.00143891987738527	0.134947614838813	0.610373011215473	0.321333588908092
H2-Q7	0.000813556931539477	0.00817540090221934	0.565821119319513	0.392716942671044
H2-T22	0.0305198443686217	0.33742971320268	0.564937798466306	0.23684711126972
H2-T23	0.00947123436288427	0.948942415428082	1.94129095199221	0.589713390131874
H2-T24	0.00947123436288427	0.0486477503940631	0.118613350614286	0.0218946583963409
H6pd	0.00262603312921287	0.0148150061104155	0.0148152792139172	0.0110072500096129
Hap1	0.00754686930048163	0.041012803340912	0.0272984761868878	0.0162389265926503
Hdc	0.000750999122238505	0.00691628814924021	0.00372444798747966	0.00310805480359636
Hebp1	0.646573068234705	0.348445564469879	0.28324450083788	0.617702033667653
Helz2	0.00349984728254893	0.0278908380326863	0.0151216088097394	0.0144223157460559
Herc6	0.0634904258856054	0.993883868830155	0.996112087513154	0.571130546817231
Hes3	0.000438151360072585	0.00305501360561281	0.0068175933054513	0.00506003388272924
Hey2	0.00218883955395365	0.00632321548429732	0.00186395793183908	0.00586268381710523
Hfe	0.00555653600007356	0.0419435306269431	0.096554398638766	0.0262840302378771
Hif3a	0.0586608400305189	0.294559958676982	0.737997792685794	0.198548903485107
Hmga1	0.00773326010681014	0.0194366381103245	0.00650870895834438	0.00540410560213833
Hmox1	0.0178701226078043	0.0635348859722592	0.0886177538832797	0.0346713592577295
Hpgd	0.00287577223899034	0.01157448443994	0.0336324644651627	0.0799574543149709
Hrh2	0.00181395001310797	0.00706450137314573	0.0102090389664845	0.00276319203400549
Hspb1	0.00100120688199227	0.0952418426971601	0.0467749941115668	0.0199752963899387
Hspb8	0.0021263677228724	0.00891531557024917	0.0151216088097394	0.0112352842556438
Htra1	0.829650203312166	1.46785298332552	1.42608102641038	0.874360477521249
Htra3	0.0354265023544481	0.0792382978788357	0.0638394628576636	0.0482760895553764
Hunk	0.283294455858389	0.129586398285453	0.188214389997176	0.238029132413221
Icam1	0.000375570061077796	0.00253408617573634	0.0015535394501592	0.0016127897696857
Idnk	0.109872318085161	0.338281408035755	0.327238275677144	0.177339833919979
Ido2	0.000563302210030543	0.0113531569144785	0.0083605855167091	0.00494531699670801
Ier5l	0.00754686930048163	0.0653540767851079	0.0276010061535024	0.0465168057896555
Ifi202b	0.000125205693554417	0.00669392711681608	0.0083605855167091	0.000691514140927223
Ifi27l2a	0.0225330754870904	0.119373199863584	0.974051407289098	0.188478145524312
Ifi35	0.024123317657938	0.386934557617047	0.455995926279143	0.18570517682823
Ifi44	0.000312984845418912	0.0289063557663704	0.0354348309008378	0.0170326572959954
Ifi47	0	0.115524507615519	0.428624093038628	0.137248235010851
Ifih1	0.0106488561303249	0.350129591693443	0.398813835317024	0.166076061598007
Ifit1	0.00175145475686817	0.601945491955566	0.63835171940364	0.253448578163362
Ifit1bl2	0.000312984845418912	0.00898927693490734	0.0693668176738183	0.00883832724197067
Ifit2	0.0545194874657394	0.350234749292023	0.462478666636893	0.187618391623656
Ifit3	0.00231377150914601	0.835951379325273	0.979904197913327	0.286626231189117
Ifit3b	0.00181395001310797	0.322298292802637	0.371310268968185	0.117454879389558
Ifitm10	0.00162645252619685	0.00632321548429732	0.00341460658878367	0.00356768690492462
Ifitm3	0.00393646819422682	0.0684948765736451	0.0863385231497408	0.0200883020728323
Igf2bp2	0.00399882705082131	0.0312960036330715	0.0230534183973568	0.00437153508407177
Ighm	0.0257720507101474	0.272642902182962	1.05789820546121	0.135538164418368
Igtp	0.00493374356496952	1.56669748667281	1.87210029223783	0.638495601329474
Iigp1	0.000438151360072585	1.01833184714373	2.4920450034326	0.794187963951432
Il12rb1	0.060548332562043	0.300324279122658	0.716966389653002	0.166271343347473
Il13ra1	6.26048063354194e-05	0.00245964581424518	0.000621705428212378	0.000691514140927223
Il15ra	0.00143891987738527	0.0517705189563888	0.0303196651302745	0.0112352842556438
Il17rc	0.00168895559472722	0.00587818004523372	0.0132822220845003	0.00345279868385671
Il18bp	0.013926490292057	0.0410844285101589	0.133688499109184	0.0326648066349984
Il6ra	0.000500728742893468	0.0140058596279319	0.051216211733777	0.00448631780767617
Inava	0.00118882162654743	0.00439329654443514	0.0068175933054513	0.0311013662458429
Inhbb	0.00306303564977469	0.010762710581464	0.00496285445677084	0.00218815633000769
Inpp4a	0.0804437223190649	0.185115240144646	0.174467426918164	0.183308499391687
Insyn2b	0.00667658588222208	0.0428018953207567	0.101904327294182	0.0304305713707175
Irf1	0.00810593752723547	0.896724270990902	0.606480940199536	0.248514997563122
Irf7	0.00256358860529788	0.27122144370327	0.451650633286432	0.0735510174469042
Irf8	0.00118882162654743	0.0605189425294259	0.0500338143109475	0.0131714787304719
Irf9	0.0274180699154747	0.308908933250143	0.42578431017225	0.213560520113178
Irgm1	0.0105869105989488	1.35344330453997	1.81284655788557	0.533707318304513
Irgm2	0.00325026399953956	0.646358025690702	1.04014456691521	0.35155629433478
Irx2	0.00143891987738527	0.00595236637369778	0.0043438429284359	0.0041419301040791
Isg15	0.000688437399213194	0.466544146587218	0.308685529787795	0.0874857639740283
Isg20	0.00131387857060821	0.0067680529549186	0.000932413258253129	0.00207310949863005
Itga7	0.000750999122238505	0.0132697033406337	0.00403419341421862	0.0110072500096129
Itga8	0.00424822359820252	0.010762710581464	0.0269958546681945	0.0216690422164477
Itgad	0.2367648158527	0.804872443430251	0.797581653719052	0.429777711444575
Itgb3	0.0171934166547841	0.0067680529549186	0.0166518508005335	0.00597729551994513
Itih5	0.0331276110617087	0.149705094869431	0.256898817978757	0.173276208489395
Itprid1	0.00131387857060821	0.0289788533005072	0.00743507591831391	0.00425673918388128
Jade2	0.226285046150429	0.504114456084407	0.648157389535183	0.32325472079471
Jam2	0.0769136698799139	0.0400812089945405	0.0390298473757742	0.092017758466923
Jazf1	0.0423516483348128	0.0223599602072953	0.0209241126287077	0.0690419655501777
Jph4	0.662773436372126	0.278647540632796	0.102185111200887	0.654201516802877
Jpt1	0.0277834843120992	0.0590427275183255	0.0357349097307968	0.0382286527432917
Junb	0.0602536465936312	0.309128086444614	0.106107830137102	0.262179447271626
Kbtbd11	0.0368153734766899	0.0741235764250433	0.0345340537485413	0.0284154827176641
Kcna4	0.00143891987738527	0.00550716582628054	0.00465339658951163	0.0162389265926503
Kcnc3	0.0170703299944501	0.0938160423750307	0.118889482517291	0.0263963252819937
Kcnip1	0.00798172715183902	0.0497134265015901	0.129599581606046	0.0248230459771872
Kcnip3	0.0102771253702589	0.0401529009180875	0.0429099191371734	0.0206531390123689
Kcnj6	0.00250114018182082	0.0334634665611063	0.0426119859895586	0.0114632665139121
Kcnk10	0.00181395001310797	0.049358327302532	0.0157339866315652	0.00402710784163862
Kcnk2	0.0117013434885929	0.0270195726943258	0.010824431610862	0.0135127712940335
Kcnmb4	0.00181395001310797	0.00950685337619662	0.0083605855167091	0.00299311376104077
Kdm6b	0.178058200538924	0.420474393327571	0.183566770840238	0.242652846891165
Kif21b	0.471347648108975	0.270879992800188	0.148003559363469	0.368527512472381
Kirrel3	2.09048519878312	1.43540017524874	1.38326789456064	2.76944070849161
Klhl29	0.08608899144281	0.244056474042186	0.194377804657616	0.143959593966909
Klhl32	0.0835007325022819	0.153488709561148	0.195912740985532	0.35058239575223
Klk6	0.259865816028383	1.01857441138791	1.63602018961431	1.57379716695569
Klk7	0.000125205693554417	0.0120907249116685	0.00527221658948348	0.00689371655923926
Klk8	0.000500728742893468	0.0307172192166644	0.12274734433905	0.209454739316254
Klk9	0.00143891987738527	0.0580573721132056	0.0190953777833498	0.0269576114277701
Lbh	0.224886075180016	0.611707987780748	0.809692960987512	0.674609646808112
Lck	0.000813556931539477	0.00817540090221934	0.00217428008378695	0.00253321743081203
Lcn2	0.000125205693554417	0.0120169925874299	0.194121752721511	0.00746605352679632
Lctl	0.0365136090183963	0.0129014218749188	0.0285080472944007	0.083463578344564
Ldha	0.0831551246034986	0.23383135952893	0.0957070505177873	0.0891744877928002
Ldlrap1	0.131951558779972	0.346019796055288	0.546205506481261	0.314622499166861
Lgals3bp	0.0023762316342321	0.0741235764250433	0.180975396077042	0.0407776636808653
Lgals9	0.00218883955395365	0.0799274743338042	0.094293206140998	0.0367850281069839
Lgi4	0.0147904897701342	0.0502813230718828	0.218908314634767	0.0706546762072141
Lims2	0.16921683549395	0.0976813521330368	0.0676246355565411	0.203076097323598
Lmna	0.155163372423284	0.345121825162879	0.384310036456805	0.297816254656556
Lmntd1	0.0146671069676463	0.00587818004523372	0.00897711638681007	0.0166925641355334
Lmo2	0.000312984845418912	0.0104673566283974	0.00341460658878367	0.00333789726196883
Loxl3	0.00897497843302583	0.00342693855491064	0.00465339658951163	0.0132852558611069
Lpo	0.0408502560672274	0.0894581651515583	0.0606253955313166	0.0303187284651459
Lrfn2	0.000625871761973814	0.00995027721077957	0.00496285445677084	0.000921912630532333
Lrfn4	0.0178701226078043	0.00898927693490734	0.0102090389664845	0.0325532133477768
Lrp8	0.00312544899471677	0.00943293028370807	0.0126683405528866	0.00918110163265333
Lrrc27	0.00262603312921287	0.00595236637369778	0.00897711638681007	0.00849543531671611
Lrrc66	0.00181395001310797	0.00506176698705299	0.0083605855167091	0.00322298263622704
Lrrc8a	0.116135019609861	0.327528945632981	0.412287056000861	0.180521138261556
Lrrtm2	0.169005371104651	0.579499644361584	0.226870620150443	0.35584637031455
Lrtm2	0.00406118201903129	0.0149620533369411	0.0099012005704675	0.0130576886531283
Ltbp1	0.00243868785829462	0.00928506770284007	0.00496285445677084	0.0220074474006604
Ltbp4	0.0472007334993334	0.019656183946105	0.00619972917221718	0.0450851052220051
Ltbr	0.0334909454324225	0.0919118074584455	0.0435055192720778	0.0778265323780118
Ly6a	0.000187802662147642	0.0210455227044871	0.182012751948115	0.0205401971448397
Ly6c1	6.26048063354194e-05	0.017825160834639	0.0529871906241519	0.0016127897696857
Ly6e	0.000750999122238505	0.0137114621409493	0.0312242447980828	0.00780929853988445
Ly6g6e	0.00293819727239786	0.0155500261095158	0.0190953777833498	0.00643561101802868
Lypd6	0.212510248985611	0.0840525885035891	0.0780324890465263	0.373380688838599
Lypd6b	0.0353660728742583	0.0173118729967662	0.00897711638681007	0.0417733367343342
Lypla2	0.0613141099168993	0.220152941866013	0.107225786455202	0.0699024015485124
Lyve1	0.000500728742893468	0.0169450774550649	0	0.00241821029305479
Maff	0.00555653600007356	0.039579221565611	0.0221414139025314	0.00883832724197067
Mafk	0.0343382126033426	0.115125520309154	0.0742865810640887	0.0669954579673252
Maged2	0.093927809323082	0.0297759794797963	0.0218372274767378	0.0808085532813286
Magee2	0.000876110827605746	0.00424468685394493	0.00743507591831391	0.00356768690492462
Map2k3os	0.00872675808630248	0.0212647156390287	0.00805217748167867	0.0114632665139121
Map3k20	0.00816803692983123	0.023745550176006	0.0148152792139172	0.0263963252819937
Map3k8	0.00181395001310797	0.00861941539664117	0.0102090389664845	0.00712269065611398
Map7d2	0.493262233828545	1.1397171246374	1.13755088271979	0.582270116482607
Mapk8ip2	0.00518290708539304	0.0294861889278004	0.0612105402968781	0.00460108735771902
March11	0.0021263677228724	0.00558137968301237	0.00527221658948348	0.00460108735771902
Marcksl1	0.212864532014233	0.536491120982461	0.39190347543239	0.575160291092972
Matn1	0.000500728742893468	0.0049875145564064	0.0151216088097394	0.00253321743081203
Matn2	0.156823860448788	0.348076805175403	0.352909321522173	0.107150409752133
Mbnl3	0.00318785844447634	0.000447658554069094	0.000932413258253129	0.00310805480359636
Mchr1	0.00125135205348273	0.0117220089138908	0.00279463563750286	0.00253321743081203
Mcl1	0.501978722112994	0.811059867141969	0.713773178535101	0.515559253563304
Mcub	0.000625871761973814	0.008323427640204	0.0068175933054513	0.00437153508407177
Mdga1	0.00300061840916383	0.00780523816423843	0.00866889846554805	0.0104369367924021
Mfsd13b	0.0546380501459213	0.028326186203379	0.0473682973317965	0.0469569169798472
Mgst2	0.00112628728931333	0.00661979578366636	0.0242681319941465	0.00632105183448125
Mid1	0.0157770045335339	0.0409411730411328	0.0282057916519565	0.0392268657477681
Midn	0.00667658588222208	0.0278182615743354	0.0227495093066256	0.0286395820842607
Mill2	0.000688437399213194	0.00802735224907545	0.0342336142965026	0.0129438856261295
Mindy4b-ps	0.00909906550520758	0.00335256463048135	0.00217428008378695	0.0057480589769172
Mir22hg	0.020081600342849	0.0466554446718301	0.0661704949745436	0.033891511594862
Mitd1	0.144004356012533	0.406209289789432	0.261218522973547	0.201852004676437
Mlkl	0.0198361219688593	0.199216830158205	0.148271694863703	0.0622400353320282
Mmd	0.00909906550520758	0.0397943898919767	0.0606253955313166	0.0149903612163278
Mmd2	0.0759276603747654	0.19982811177275	0.211637301640614	0.18426785976382
Mmp11	0.00704965723591621	0.00208736086358355	0.00341460658878367	0.0103228351077096
Mns1	0.00860262480411404	0.0377124875029113	0.0579879986730651	0.0238103435083961
Mov10	0.0023762316342321	0.0581277868502618	0.042313964051329	0.0274064136243361
Mpeg1	0.000750999122238505	0.0167983215591806	0.0148152792139172	0.0016127897696857
Mpped2	0.235479386942333	0.113794411735803	0.168442456536574	0.302257437202403
Mrgpra1	0.00729829417067824	0.0612913291791184	0.0713955347338248	0.0092953336580114
Mrgpra2b	0.00736044374614362	0.0533990024664973	0.0846256844629054	0.0104369367924021
Mrgpra6	0.0089129291223567	0.0450872722675852	0.0763053518705321	0.00998045191766191
Mrgpra9	0.00704965723591621	0.0429448844980208	0.0757289759523564	0.00494531699670801
Ms4a4b	0.000813556931539477	0.00513601390468548	0.0099012005704675	0.00115225804890073
Mt1	1.39613540186181	2.87095473927818	2.73517906315534	1.57854101876408
Mt2	0.125235215475455	1.14067161753216	1.23845567257555	0.261735835331634
Mtfr2	0.00362461556850902	0.0076571346947965	0.0083605855167091	0.0106651011116298
Mvp	0.194118657758999	0.517591524184034	0.373667013431319	0.298671861446228
Mybphl	0.0154688232012683	0.00661979578366636	0.0123612584102694	0.0110072500096129
Myc	0.0159618677548417	0.061992981541615	0.0123612584102694	0.0190707909019459
Mycn	0.00381173881394425	0.000596833550235585	0	0.00149767672135069
Myd88	0.018116084007432	0.047723244914076	0.0324290795716932	0.0294235346168899
Myh3	0.0132471094819828	0.00156592898137948	0.00186395793183908	0.0130576886531283
Myh7b	0.00474683017457625	0.0148885324265392	0.0699468712098803	0.0224584762473723
Myo16	0.00387410544876282	0.0136378492250412	0.0166518508005335	0.0325532133477768
Myzap	0.00275091048030445	0.0104673566283974	0.0181797547281242	0.0350053936023494
Nab2	0.000438151360072585	0.00780523816423843	0.00186395793183908	0.000230557850147138
Naprt	0.00667658588222208	0.015990778926564	0.0175688732673784	0.0136265096022135
Nat8f1	0.254249650048492	0.100857336788944	0.0682057002385018	0.15537511556656
Ncaph	0.000876110827605746	0.00305501360561281	0.00248450596577076	0.00402710784163862
Nde1	0.378159869825951	0.819842548563434	1.04387388545811	0.359233029923784
Ndst4	0.0603125907349086	0.169300999772161	0.160263979095051	0.0623483646369714
Nectin2	0.00860262480411404	0.0023107484650978	0.0083605855167091	0.0165791740408871
Neil2	0.0112061933042253	0.00587818004523372	0.0236609596368806	0.0231346383210032
Nes	0.000500728742893468	0.00728678002871729	0.00527221658948348	0.0016127897696857
Nfkbia	0.518851708213907	0.908315507933839	0.756555141860286	0.43344672246701
Nfkbiz	0.0263210248757611	0.0884340346794878	0.0544606142959937	0.056263778527973
Ngfr	0.0482751222106527	0.0130487507373528	0.0120540819392426	0.0414415558559698
Nhs	0.00760900342950804	0.023745550176006	0.0102090389664845	0.0392268657477681
Nlrc5	0.00530746556854885	0.824499657826593	0.995652632022075	0.546604991404566
Nmi	0.109423477854113	0.377156059018466	0.317778655556218	0.221352324612699
Nmnat2	0.0107107978246897	0.040582944558519	0.0661704949745436	0.0198622779353175
Noc4l	0.0513724434243399	0.123405044268328	0.0763053518705321	0.0558277452789803
Noct	0.0165778317938875	0.0666813956873487	0.0260874402451107	0.031995060039275
Nod1	0.218918517228637	0.47766800485887	0.487806472206394	0.337834638576282
Nos3	0.00990525637504721	0.00342693855491064	0.00403419341421862	0.00586268381710523
Notch1	0.0333698486429107	0.0815795625500351	0.0360348985404642	0.0621316942905752
Noxo1	0.0214919327745399	0.00817540090221934	0.0114394457800317	0.0368961501760801
Npr2	0.00847847611094081	0.00335256463048135	0.00496285445677084	0.0132852558611069
Npsr1	0.00928516724775315	0.0029062048853615	0.00403419341421862	0.0067792098468738
Nr1d1	0.0244288437504249	0.0101719154156	0.0157339866315652	0.023697757679174
Nr1d2	0.341464459100599	0.176895541131819	0.33816257606803	0.421340503623532
Nrcam	0.0313089563881714	0.216253148900435	0.0863385231497408	0.219317474807351
Nrxn3	0.0470215564358115	0.110659314454797	0.245530820150377	0.130693884367235
Nsg2	0.0220432610009592	0.00661979578366636	0.00527221658948348	0.0188445366392696
Nsun4	0.0443300408047418	0.086998487672913	0.0851969567334593	0.0627815645424856
Nsun7	0.00729829417067824	0.0552367091317283	0.13504776464317	0.0537539869826177
Nuak2	0.00387410544876282	0.00104422506611475	0.00341460658878367	0.00402710784163862
Nucb2	0.0422916359044201	0.00980249111203064	0.00866889846554805	0.0120329948686074
Oas1a	6.26048063354194e-05	0.0291238326030086	0.0874787878779618	0.0231346383210032
Oas1c	0.000375570061077796	0.00758307473377418	0.010824431610862	0.0123746761430998
Oas1g	0	0.00869339864890854	0.0233572351554127	0.00849543531671611
Oas2	0.000813556931539477	0.0194366381103245	0.0203149058570654	0.00391227239353217
Oasl1	0	0.0336077971900353	0.00866889846554805	0.0113492818817667
Oasl2	0.00206389198881765	0.452023858196845	0.843567033226226	0.345208933159685
Odc1	0.0987606003626354	0.330965177230506	0.204313033561748	0.144358850855339
Ogdhl	0.303833166235036	0.674311574783546	1.17406108358905	0.586127002059581
Ogfr	0.153875937015185	0.397270659399066	0.362043875335022	0.185609419935755
Olfm2	0.00268847375405276	0.00876737642805922	0.00650870895834438	0.00460108735771902
Olfml1	0.948447065441005	0.591962898006012	0.698116579016595	0.876714198235442
Olfr56	0.000563302210030543	0.00987638689149648	0.096554398638766	0.0196362026993424
Olfr920	0.000750999122238505	0.00305501360561281	0.0145088557515188	0.0111212736325805
Ophn1	0.0153455240702384	0.0502813230718828	0.0227495093066256	0.0427680194089854
Osmr	0.000312984845418912	0.0319467359330191	0.00650870895834438	0.00586268381710523
Pacs1	0.0839613573093888	0.0411560485496083	0.0606253955313166	0.13955721507894
Palmd	0.00137640117841279	0.00736086193575221	0.00186395793183908	0.00391227239353217
Panx1	0.00143891987738527	0.00691628814924021	0.0111319859757496	0.0230219763869575
Papss2	0.00928516724775315	0.0208262817138691	0.0142023383650009	0.0152174890860356
Pard6g	0.0260770735634517	0.0101719154156	0.00866889846554805	0.0306542196623477
Parp10	0.000375570061077796	0.112461528950487	0.248445595907223	0.0787860092169567
Parp11	0.0580111907842922	0.268885868832161	0.459537175267043	0.199115924830933
Parp12	0.0709246581793646	0.664798817163194	0.881753345059344	0.402709192803073
Parp14	0.00156394555078872	0.607164014118816	0.664929385564217	0.190862479678462
Parp3	0.0171318752184079	0.413046390522907	0.399022496523075	0.171626701572547
Parp9	0.00810593752723547	0.452118829140698	0.506155757704881	0.19514000699717
Patl2	0.00187644136393479	0.01297508901936	0.0446956563785763	0.0145359506570956
Pde10a	0.146711198982045	0.0544596299654973	0.0269958546681945	0.197508528572594
Pde11a	0.00804383426806442	0.00335256463048135	0.00743507591831391	0.0203142751349803
Pde3a	0.00150143466801437	0.0132697033406337	0.0429099191371734	0.0609391674969558
Pdk1	0.0312482775662843	0.0121644517998523	0.0187902632405266	0.0414415558559698
Pdk4	0.130853605580872	0.342158087357987	0.503903909267274	0.107668162870541
Pdlim4	0.00118882162654743	0.00921112821284424	0.0068175933054513	0.00184297612093925
Pdxk	0.200901579634141	0.501948397351944	0.445296309128172	0.401783881721706
Pdzrn3	0.0162082989017327	0.00750900928746778	0.0015535394501592	0.0466268517477098
Per2	0.0152222097346581	0.0425158556138924	0.0470716897227699	0.0139676469289299
Per3	0.0611374441072893	0.0285437892363357	0.0655882461577671	0.0522231980131673
Pgf	0.00468451794661323	0.015182583641764	0.0111319859757496	0.00563342099636896
Pgs1	0.150703927925196	0.333213804195214	0.228851329830931	0.18129084180736
Phf11d	0.000500728742893468	0.0119432548263348	0.0099012005704675	0.00391227239353217
Phf21b	0.0269915842867088	0.0688432461788661	0.164493480220999	0.042215540074924
Phyhd1	0.0478574415310619	0.662877666164083	1.1779941469706	0.188860021230799
Piezo2	0.0208789891454569	0.152335903214298	0.14397287528287	0.731619239577594
Pik3r5	0.00137640117841279	0.0265109838014328	0.0163459896762878	0.0128300696465276
Pim1	0.00418588029223713	0.023745550176006	0.00959326738079057	0.0121469015990521
Piwil4	0	0.00795331970229078	0.0102090389664845	0.001727889568532
Pkig	0.295668232626875	0.541106432215449	0.396097270087599	0.369643440566991
Plac8	6.26048063354194e-05	0.00387306597781673	0.0163459896762878	0.000806720021162765
Plce1	0.0065521978285267	0.0381435816827851	0.0187902632405266	0.00838111187557035
Plec	0.0065521978285267	0.0263656251670491	0.0239645918977967	0.0451953088370707
Plin4	0.0614907445212138	0.618927632177808	1.02307657838411	0.205707526309192
Plin5	0.00137640117841279	0.00691628814924021	0.0129753284250096	0.00253321743081203
Plp2	0.0125672667998187	0.00587818004523372	0.00619972917221718	0.0211047789670347
Plppr3	0.00860262480411404	0.00268295027667863	0.00217428008378695	0.0294235346168899
Plvap	0.00443523019936365	0.0571415290459289	0.0786075391844604	0.097366423370967
Plxna2	0.184065569147143	0.0986284453739727	0.0874787878779618	0.19514000699717
Pml	0.0781303408888695	0.220751562448998	0.147735351947304	0.100812141759539
Pnpla2	0.133431885958019	0.350339895833646	0.444897820010308	0.143560177608744
Pnpt1	0.247820236463756	0.47219135502442	0.331041873705473	0.324422300982165
Ppa1	0.124903736844877	0.242300965805623	0.144780312859938	0.131199593198459
Ppara	0.0122580945439209	0.00535872158768328	0.0135890215891675	0.0197492467060815
Ppl	0.00262603312921287	0.00861941539664117	0.0974010293687436	0.0297593262277733
Ppp1r17	0.012010687897768	0.00156592898137948	0.00186395793183908	0.0198622779353175
Prdm1	0.000250395712605652	0.0029062048853615	0.00124302457892367	0.000806720021162765
Prickle3	0.0247953518870834	0.0115007140408605	0.0154278445964762	0.0536447225913643
Prickle4	0.0106488561303249	0.00394740120202957	0.00496285445677084	0.00975213131458861
Prkar1b	0.00940921583786896	0.0354822021738541	0.0187902632405266	0.0165791740408871
Pros1	0.0495271185255579	0.46827436630788	0.341483030796754	0.405095624384187
Prtg	0.266218492173057	0.155470988311513	0.117784497117324	0.2421099887979
Psg16	0.00723614073240306	0.0359862499545443	0.0491460978595742	0.0110072500096129
Psmb10	0.0531550053295829	0.569753745232237	0.547285428414993	0.170752330426463
Psmb8	0.00125135205348273	1.04987830246704	1.40417841182458	0.467177321596026
Psmb9	0.000625871761973814	0.373618423338079	0.751728071244951	0.215514170396335
Psme1	0.0835583222078385	0.337962107473264	0.416191338192691	0.219410057863098
Psme2	0.202487889440568	0.733154089790739	0.653024402042342	0.343493122053936
Psme2b	0.00318785844447634	0.016211082507845	0.0178743606447705	0.00689371655923926
Ptp4a3	0.00143891987738527	0.00602654719895876	0.0166518508005335	0.0067792098468738
Ptpn5	0.000438151360072585	0.0112793701855697	0.00248450596577076	0.00494531699670801
Ptprn	0.144600490439962	0.0587612964626366	0.114184838719738	0.177339833919979
Pxylp1	0.025222775006355	0.0684251880868671	0.158142501306943	0.0400025653360652
Pygo1	0.00971927000712583	0.00491325661192693	0.0043438429284359	0.0155580841941251
Qpct	0.522311248080133	0.215892400110469	0.156548434171033	0.401398082596736
Rab37	0.0499441025404716	0.133250826804406	0.507654177798534	0.0949578214072474
Rab3b	0.0505394925309009	0.0996421937392264	0.130691595417043	0.152310694895157
Rab7b	0.0255279654217529	0.00654565895465466	0.00928523933905549	0.0770796356324366
Ralgps2	0.012319936642572	0.0627642309405669	0.0641311392015455	0.151914600872112
Rasgef1c	0.00187644136393479	0.0531159783754231	0.0754406633669306	0.014763181747831
Rasip1	0.00200141235130169	0.0786176327135912	0.0411209873327745	0.0417733367343342
Rassf3	0.0876960892361216	0.0337521069906399	0.0426119859895586	0.120218977078904
Rassf4	0.129479466671342	0.458697310585458	0.29373054438863	0.107771681333799
Rbl1	0.00599226003667133	0.0243283826044505	0.0257844519633187	0.0128300696465276
Rbm11	0.0552306527818147	0.0238912901324892	0.0288102116059762	0.0682884762537687
Rbm3	0.265594638319282	0.583005041495617	0.813008358449182	0.365652251793131
Rbm43	0.0100912081584717	0.0759236232498125	0.0699468712098803	0.0362292324642869
Rbms1	0.0733711120126908	0.154192548659934	0.233293634251111	0.259247965185757
Rbpms	0.0146054098571894	0.00558137968301237	0.00558148304686453	0.010094592673312
Rcn1	0.00106374904129133	0.00713859974822746	0.00743507591831391	0.005174737610296
Rdh9	0.00748473131056533	0.00379872522746754	0.00186395793183908	0.0177124968234039
Rexo5	0.065016900426619	0.0330303496442286	0.0324290795716932	0.0808085532813286
Rgl1	0.0505990120376779	0.123471004837678	0.137218753781561	0.182924497390157
Rgs11	0.010153184403059	0.00461616967929852	0.00248450596577076	0.00494531699670801
Rgs12	0.0187921660848377	0.00876737642805922	0.0378329439926087	0.0195231459122111
Rgs20	0.0106488561303249	0.626574223266534	0.193096888847092	0.121240781188352
Rgsl1	0.0113300038372489	0.00543294646144341	0.00650870895834438	0.0298712317125178
Rhoj	0.517546624873336	1.62288006629047	1.01612194640695	1.15697272845848
Ric3	0.173910388738218	0.402074494259762	0.401106717403134	0.160199805628855
Ripk2	0.135402252888499	0.243237620364143	0.199739805711355	0.19314610435348
Rmi2	0.000876110827605746	0.00350130694827066	0.00279463563750286	0.00207310949863005
Rnd2	0.130359133072822	0.248431808872736	0.366148920236127	0.128364324119495
Rnf125	0.0350638706853382	0.29494898648396	0.274539500986799	0.114785915146321
Rnf150	0.0190993250818709	0.012680387874908	0.00496285445677084	0.0229093017587702
Rnf19b	0.0656033861299974	0.211975923820354	0.2040595132856	0.120934349569361
Rnf213	0.0780145312151059	0.98848302735458	1.03120357482875	0.463630220660213
Rnf217	0.0339146687505872	0.156492564561357	0.145318242607829	0.120218977078904
Rnf225	0.0147288002718047	0.0278182615743354	0.0200101632398623	0.0183918744830077
Rnf31	0.0569472171785159	0.125711079392169	0.118337142441392	0.0936988527295969
Rnpep	0.369587483341016	0.827342279323032	0.92902826958065	0.482736411528881
Rsad2	0.00574329812098778	0.367177616200526	0.285584253653411	0.253448578163362
Rtkn2	0.400890323876954	0.804037874123736	1.07087640542324	0.72276031138296
Rtn4r	0.00804383426806442	0.00312940966254898	0.00279463563750286	0.0116911968081169
Rtp4	0.046304526964848	0.439071159022088	0.580719410863137	0.227523982530344
Runx1	0.00106374904129133	0.0495003821139663	0.0378329439926087	0.154486412040027
Runx2	0.130249217081229	0.0587612964626366	0.0658794129428653	0.238029132413221
Rwdd3	0.0440305358452616	0.0191438353307991	0.0166518508005335	0.0413309377634384
S100a10	0.00971927000712583	0.0441594677089052	0.053576820635736	0.0421050075706562
Samd9l	0.00916110326767551	0.296281648308644	0.495035019140332	0.189241751163896
Samhd1	0.10661365289759	0.373772494098955	0.229840215407155	0.145854646080687
Sapcd1	0.00617894080616027	0.018997401784709	0.0138957269967669	0.0122607953562313
Sat1	0.325587346963378	0.700357183717389	0.729338382604883	0.328664137401061
Sbk2	0.00449755796245381	0.00119331110264537	0.00186395793183908	0.00632105183448125
Sbno2	0.138623093598961	0.456997679535318	0.293266825480411	0.27425847273714
Scrg1	0.0557044821722415	0.319157565036352	0.215404770460457	0.141360531414645
Sdc1	0.00275091048030445	0.00691628814924021	0.0015535394501592	0.017599222326611
Sdc3	0.0127527242817653	0.041227663459995	0.0257844519633187	0.0103228351077096
Sdc4	0.0190379008297325	0.0597459588374196	0.055637792123109	0.023359924118109
Sel1l3	0.320647434792659	0.159805498241379	0.169755324136016	0.409009339740259
Sema3b	0.0224718617952457	0.00802735224907545	0.00403419341421862	0.0364515877917944
Sema3c	0.135730270256898	0.0445164174957004	0.0664614923021279	0.102270382312512
Sema3e	0.0777828716241693	0.244874657747455	0.154951821927477	0.193241142303393
Sema4b	0.00847847611094081	0.0258567034902619	0.0461813386736437	0.0351167135931691
Sept9	0.00586778682658396	0.0117957629903673	0.0272984761868878	0.0388942387816824
Serf1	0.0382023183109939	0.0178984661660528	0.00897711638681007	0.047506783719754
Serpina3f	0	0.0117957629903673	0.00527221658948348	0.00103709197209299
Serpina3g	0	0.00521025531012245	0.0142023383650009	0.00299311376104077
Serpina3i	0	0.00773118917134717	0.0129753284250096	0.00253321743081203
Serpina3m	6.26048063354194e-05	0.0123118892712613	0.0224455078270803	0.00425673918388128
Serpina3n	0.0194063897612244	1.29167217705746	1.36405917890534	0.815734509008986
Serpinb1a	1.62140086854649	0.999777567303582	0.847038814902254	0.845922467057444
Serpinb9	0.000813556931539477	0.00847143246951654	0.0169576184023561	0.00838111187557035
Serpine1	0.000250395712605652	0.00446759310868563	0.00124302457892367	0.000461062555624696
Serping1	0.000688437399213194	0.158532591527564	0.306856940169852	0.0465168057896555
Sertad1	0.0378406920266586	0.0674490389972524	0.0215329484934071	0.0640800394229284
Sez6	0.00878881894947295	0.0195830073563112	0.0297161571070117	0.00758048162245147
Sfxn1	0.00300061840916383	0.01157448443994	0.0190953777833498	0.0067792098468738
Sgk1	1.84716218258935	2.62372758965393	2.79793054217442	1.68190753788815
Sgk3	0.630672545163423	1.42565446147817	1.68373426262288	0.694954912831202
Sh2d3c	0.00804383426806442	0.00178943308166563	0.00465339658951163	0.0183918744830077
Sh3bp4	0.0331881759583918	0.0146679372578229	0.0279034446234161	0.0271820377039793
Shank2	0.000938660810926858	0.0113531569144785	0.0242681319941465	0.00597729551994513
Shbg	0.00349984728254893	0.0103935045078117	0.00496285445677084	0.0194100763417974
Shfl	0.00281334330845474	0.0217759790531728	0.0257844519633187	0.0155580841941251
Shisa2	0.000876110827605746	0.00580398821275001	0.00186395793183908	0.000806720021162765
Shisa5	0.0397076884452282	0.137162156174025	0.261218522973547	0.102790667596663
Shroom4	0.0322186971629857	0.0180450607098348	0.0230534183973568	0.0550642293055389
Sik1	0.0023762316342321	0.00654565895465466	0.00959326738079057	0.0119190751619414
Slc10a6	0.000125205693554417	0.052549689771952	0.00743507591831391	0.00149767672135069
Slc14a1	0.00131387857060821	0.00884134873490292	0.00527221658948348	0.00643561101802868
Slc16a2	0.0267477965233484	0.0613615165737354	0.0968366885322037	0.0965293066136247
Slc25a22	0.024123317657938	0.0762694149400746	0.0452901941930419	0.0350053936023494
Slc26a6	0.00505833308548875	0.0112055780117777	0.0117468110818374	0.0092953336580114
Slc2a10	0.000125205693554417	0.0100980414720248	0.0142023383650009	0.0057480589769172
Slc30a1	0.138568589412495	0.0701659449670007	0.160793646057887	0.134430087812455
Slc38a3	0.00443523019936365	0.0148150061104155	0.0197053277262864	0.0189576701694816
Slc39a1	0.175172303847405	0.337695945768429	0.301351022865305	0.254074745958767
Slc39a14	0.0830975116725599	0.498690486620742	0.405469492484579	0.331978523095122
Slc5a5	0.020511042550961	0.0095807710044655	0.00558148304686453	0.0149903612163278
Slc7a1	0.0107107978246897	0.0499264255109702	0.0215329484934071	0.0248230459771872
Slc7a14	0.0190379008297325	0.0946989203503432	0.137760765428188	0.0391160023853627
Slc7a15	0.109086715424839	0.048505574401926	0.0500338143109475	0.0685038168493984
Slco5a1	0.00118882162654743	0.00431899445979505	0.007126382272479	0.00356768690492462
Slfn8	6.26048063354194e-05	0.0377843494398344	0.0470716897227699	0.0259470694246351
Slfn9	0.000125205693554417	0.0310066532987925	0.0260874402451107	0.0110072500096129
Slit3	0.0210016079309495	0.145197413030878	0.253526099130983	0.0311013662458429
Snhg1	0.202896851554369	0.402523672885817	0.253043352218351	0.198454368661362
Snhg15	0.0255279654217529	0.0661227392872362	0.039627762279028	0.0386724259879974
Snhg4	0.0559413127011824	0.119638081712003	0.0312242447980828	0.042215540074924
Snx10	0.01885360543244	0.482792534342099	0.686132853484758	0.54940431906161
Snx22	0.0365739691954377	0.0835722010857879	0.104428548736711	0.0378956935235577
Socs1	0.00125135205348273	0.105031563340886	0.0393288495151794	0.0114632665139121
Socs2	0.00175145475686817	0.0676582940329327	0.0135890215891675	0.0307660250539997
Socs3	0.00624115998574642	0.272188255267161	0.0854824705333242	0.0884360220009753
Sorcs2	0.010153184403059	0.0281085358090362	0.0099012005704675	0.0540817085423921
Sox11	0.000688437399213194	0.0169450774550649	0.00650870895834438	0.0224584762473723
Sox5	0.0174395445337961	0.109723552601626	0.0603326947005293	0.203452439959781
Sox9	0.00748473131056533	0.0223599602072953	0.0236609596368806	0.0115772381550419
Spdya	0.0390456047576831	0.0195830073563112	0.0126683405528866	0.0564817238763155
Sphk1	0.000438151360072585	0.037928057823122	0.000932413258253129	0.0016127897696857
Spocd1	0.0171934166547841	0.0067680529549186	0.0215329484934071	0.0374515753752809
Spry1	0.105769163552443	0.2351299787847	0.104708624875559	0.0968433075241906
Spry2	0.209112889028742	0.393048289928131	0.306856940169852	0.161574023798541
Src	0.0229002789695882	0.0695396215164194	0.107225786455202	0.0737652279014612
Srrm3	0.00156394555078872	0.0106888802709782	0.0068175933054513	0.00299311376104077
Srxn1	0.0387445126552191	0.0830915827849978	0.082337326256782	0.0570263795244466
Ssbp4	0.00624115998574642	0.0392205047732175	0.0777448399240028	0.0265086077173493
St6galnac5	0.00736044374614362	0.0921840631254035	0.0206195556344972	0.0279671332665973
St8sia5	0.00156394555078872	0.050707033954812	0.0667524049749013	0.0605051685561535
Stat1	0.210128235337991	1.69962884213001	1.87343847139972	1.11245770810025
Stat2	0.142105196907306	0.874345549463554	1.06681872002242	0.429477605185951
Stat3	0.477502780797635	1.27615070987403	1.12763241043077	1.02332020765855
Steap3	0.0043105630177224	0.0813732007251837	0.0175688732673784	0.126537396996715
Stk32a	0.0023762316342321	0.0339685326515862	0.0102090389664845	0.0218946583963409
Strip2	0.00337506342752112	0.0824045842608694	0.0393288495151794	0.042436568437907
Sulf1	0.00175145475686817	0.0399378097264083	0.0178743606447705	0.00563342099636896
Sult1a1	0.00692531558206983	0.108251298229135	0.154951821927477	0.00746605352679632
Supt3	0.833738213996081	0.503302733781936	0.484938652382426	1.06113172243139
Sv2c	0.00106374904129133	0.0499974151000502	0.00186395793183908	0.0047158437372238
Syne2	0.0681213625083503	0.265686976137429	0.201520769249071	0.291289608125249
Synpo	0.0762757747543922	0.0373531003358092	0.0266931415419946	0.120525627955454
Syt4	0.00536973899255393	0.0616422168998702	0.0506251877803102	0.320999101940035
Syt6	0.000938660810926858	0.00980249111203064	0.00217428008378695	0.00609189408844793
Sytl5	0.118640279946009	0.0649345571633156	0.0623798036454795	0.281157995636056
T2	0.186042706340244	0.080134134686309	0.14397287528287	0.321082734171528
Tagln2	0.035245202957609	0.15885097014057	0.0851969567334593	0.250670826601023
Tap1	0.00106374904129133	0.670883662413981	1.17875977361208	0.365812205566832
Tap2	0.0235119852917056	0.658715340895662	0.87257001874141	0.223751820947102
Tapbp	0.0971712003701198	0.579123336256877	0.799260925179048	0.373221941198396
Tapbpl	0.0175625857599291	0.282986902451304	0.262175928623092	0.0898070247217599
Tbc1d1	0.00667658588222208	0.0137850696383949	0.0148152792139172	0.0126023988177189
Tbc1d10a	0.0342777173205799	0.0719036768775926	0.0652969945698798	0.0367850281069839
Tcf7l1	0.0750568438779432	0.0369216651757549	0.0620876159561723	0.132513240539218
Tcim	0.000312984845418912	0.00565558803245638	0.00217428008378695	0.000806720021162765
Tenm2	2.23450438282507	1.52720324862891	1.92726948404632	2.06534491349534
Tenm3	0.179262564807866	0.49619463440501	0.249899803995047	0.390144666670217
Tgfb1i1	0.00468451794661323	0.0214108175746381	0.0190953777833498	0.0120329948686074
Tgif2	0.0100912081584717	0.0298484139980456	0.0336324644651627	0.0268453793991566
Tgm1	0.00137640117841279	0.00617489234313694	0.00774367430178797	0.00126741086401051
Tgm2	0.000938660810926858	0.00802735224907545	0.0129753284250096	0.00241821029305479
Tgtp1	6.26048063354194e-05	0.00721269263314682	0.0934439390201734	0.00735161233585361
Tgtp2	6.26048063354194e-05	0.0724591139310498	0.548184473342869	0.170946701206344
Timeless	0.0146054098571894	0.0618526904488718	0.0488500171692652	0.0251603856913143
Timp1	0.000813556931539477	0.023745550176006	0.0163459896762878	0.00356768690492462
Tle3	0.177796190172243	0.457233912219297	0.534977486507077	0.3705193684346
Tle6	0.0126909089426463	0.00602654719895876	0.00897711638681007	0.0173726348324214
Tlr3	0.00480913851996746	0.127814810841181	0.137218753781561	0.0483859420921879
Tma16	0.250747822639879	0.631189847603799	0.365501874517438	0.425115913043769
Tmem106a	0.00568104795616814	0.0124593050080667	0.00959326738079057	0.0092953336580114
Tmem140	0.0043728985512813	0.187530913816013	0.735467448694731	0.249054390691521
Tmem141	0.15666328850832	0.0741928689427832	0.082623657572071	0.262534195188154
Tmem178	0.0125672667998187	0.00409605507533206	0.00403419341421862	0.0450851052220051
Tmem202	0.0107107978246897	0.0240370088519326	0.0446956563785763	0.0205401971448397
Tmem220	0.0307627143964939	0.0123118892712613	0.019400399259684	0.0324416076061036
Tmem229b	0.0436110781433825	0.143259311817334	0.193353203302449	0.10549179605038
Tmem236	0.00206389198881765	0.00602654719895876	0.00465339658951163	0.00299311376104077
Tmem268	0.0904451193647949	0.184867148473799	0.50840254671204	0.137248235010851
Tmem81	0.10756987948015	0.0491452072415198	0.068496106014948	0.091386618805012
Tmem88	0.00112628728931333	0.00580398821275001	0.00248450596577076	0.00126741086401051
Tmprss9	0.00878881894947295	0.0187044703484746	0.0145088557515188	0.00838111187557035
Tmsb10	0.126394526156688	0.316768346559299	0.185376745881724	0.173082290014538
Tnc	0.00106374904129133	0.0318021653455058	0.000932413258253129	0.00149767672135069
Tnfrsf12a	0.0330670424966966	0.124459891637901	0.0224455078270803	0.0597452168850724
Tnfrsf1a	0.00206389198881765	0.0750240048584446	0.0751522676333847	0.082720881605213
Tnfsf11	6.26048063354194e-05	0.00431899445979505	0.0163459896762878	0.0223457381055438
Tnr	0.00692531558206983	0.0481500459601226	0.0494420909120552	0.104038248945476
Tns1	0.052561171016426	0.0241098602496983	0.0345340537485413	0.132311253235958
Tor3a	0.0152838688032514	0.0921160061573938	0.0754406633669306	0.0453055003086378
Tox2	0.00187644136393479	0.0364180887872594	0.00341460658878367	0.0041419301040791
Tox3	0.00841639598403902	0.0198756815920911	0.0206195556344972	0.0269576114277701
Trib1	0.00549427420783344	0.211130363667762	0.0725529564367993	0.0436513519486281
Trib3	0.000312984845418912	0.00402173090092757	0.00650870895834438	0.00448631780767617
Trim12a	0.00181395001310797	0.135208403800176	0.411463155881964	0.164805799838814
Trim12c	0.0043728985512813	0.118379267578829	0.318683436950729	0.104557615485796
Trim21	0.0123817749170145	0.175456383387746	0.265281181650286	0.0771863693279653
Trim25	0.0414510835027634	0.300490065532029	0.28042955197645	0.140459279740463
Trim30d	0.00181395001310797	0.032380322333917	0.0609180107133963	0.0197492467060815
Trim34a	0.000750999122238505	0.0661227392872362	0.237716291847735	0.0644043948706864
Trim5	0.00162645252619685	0.0062490566636864	0.0342336142965026	0.0119190751619414
Trim56	0.0243677459991666	0.268315387980185	0.29627716174405	0.133219874982475
Trim69	0.000438151360072585	0.00550716582628054	0.0190953777833498	0.0197492467060815
Trim9	0.00512062202527607	0.0236726722319399	0.00805217748167867	0.00494531699670801
Trpv4	0.0155921071314966	0.0359142586818137	0.0788949402949504	0.0488252316033905
Tspan4	0.00947123436288427	0.370635046638007	0.319135520847024	0.125012403976657
Tspo	0.0270525219423567	0.110659314454797	0.184601443401929	0.0849473190734675
Ttc9b	0.00337506342752112	0.0120169925874299	0.0129753284250096	0.00253321743081203
Tubb3	0.350103835279463	1.48579776922743	1.74340761571676	0.599256896722316
Tubb6	0.00156394555078872	0.0325248093671291	0.007126382272479	0.00632105183448125
Tvp23a	0.0443899310337556	0.151245920041772	0.339492081302212	0.116839596513081
Txnrd1	0.259237985169825	0.506275833145386	0.360093483016327	0.334704645668315
Txnrd3	0.0203270184719952	0.00869339864890854	0.00403419341421862	0.0164657710874691
Uba7	0.000688437399213194	0.045301258820317	0.196168334804589	0.0428784786572293
Ube2l6	0.00325026399953956	0.0933403234858519	0.100780402606606	0.0281913331192842
Ucn2	0.000250395712605652	0.0338963959689308	0.00186395793183908	0.0154445653803883
Unc79	0.0164546693352749	0.0662624326490798	0.0693668176738183	0.037118357276789
Upp1	0.00143891987738527	0.0159173336128906	0.00465339658951163	0.00126741086401051
Usp18	0.00549427420783344	0.271960854271827	0.33527590322834	0.140158681924298
Vamp9	0.00779538265604508	0.0029062048853615	0.00403419341421862	0.0153310336786674
Vat1l	0.00268847375405276	0.0183381853432652	0.0184850555744051	0.012716240711374
Vav2	0.0399483375081936	0.109723552601626	0.156016513280764	0.0620233415100691
Vav3	0.00262603312921287	0.0114269381993077	0.0212285768961955	0.0871688105278738
Vegfa	0.183961400931423	0.0893216750066105	0.0393288495151794	0.10414214383511
Vegfb	0.240906483465359	0.123602912925421	0.0840540856537931	0.226605254307048
Vgf	0.000375570061077796	0.0278182615743354	0.00279463563750286	0.00138255042047621
Vwa3b	0.0176241006962826	0.010762710581464	0.0279034446234161	0.0368961501760801
Vwa5a	0.109535706799934	0.406358420561618	0.512694833149633	0.386704640370419
Wdfy4	0.0019389288098367	0.00898927693490734	0.00527221658948348	0.00287815950552318
Wnk4	0.00206389198881765	0.0138586717181756	0.00589065388807404	0.00264821134344851
Wnt5b	0.0827517643652747	0.0308619467292394	0.0239645918977967	0.065160815363064
Xaf1	0.593226574477264	1.09694062265513	1.15082108748858	0.854249643197189
Zbed5	0.0308234226880419	0.0109841688130657	0.0181797547281242	0.036118036257075
Zbp1	0.000187802662147642	0.122150966089783	0.649782360438126	0.125215870797643
Zbtb16	0.833982964010931	1.54684347646131	1.71454798485788	1.05235555755545
Zbtb42	0.000250395712605652	0.00208736086358355	0.00248450596577076	0.00391227239353217
Zc3h6	0.2629509416763	0.1109933030189	0.304337157233873	0.380183106584306
Zc3hav1	0.0633141441723993	0.489310183834704	0.641303529494053	0.320497161616474
Zfand4	0.104190872790122	0.76237096542667	1.31117892834434	0.469631202076662
Zfas1	0.160349935621193	0.365522078556738	0.359442505986432	0.206551874329226
Zfp36	0.0442102495851212	0.120763047474524	0.0479612487520288	0.104038248945476
Zfp365	0.376614520909338	0.813643242620617	0.952213259148284	0.632327308529742
Zmiz1os1	0.0520858495349393	0.0255657747749525	0.0491460978595742	0.133724308331675
Znfx1	0.318737450342059	0.78658699558038	0.792667609732362	0.445703496107603
Zyx	0.051729210098173	0.114393629869966	0.230828124054687	0.106943233422324
1110006O24Rik	0.00760900342950804	0.00521025531012245	0.0157339866315652	0.00986629813241247
1700057H15Rik	0.00287577223899034	0.00424468685394493	0.0172632925389303	0.00437153508407177
1700086P04Rik	0.00636558673244398	0.00580398821275001	0.0169576184023561	0.0130576886531283
1700087I21Rik	0.00281334330845474	0.000969673712028582	0.00928523933905549	0.0171459959847031
1700113H08Rik	0.000813556931539477	0.00119331110264537	0.00959326738079057	0.00586268381710523
1810010H24Rik	0.00897497843302583	0.00454188415336674	0.0120540819392426	0.0104369367924021
1810044D09Rik	0.0320974462009003	0.0227247753231157	0.0664614923021279	0.0293115790183632
1810059C17Rik	0.0058055444109656	0.00394740120202957	0.0138957269967669	0.00792368736765239
1810062G17Rik	0.00243868785829462	0.00164043589873301	0.00805217748167867	0.00264821134344851
2010315B03Rik	0.155109762360512	0.141187855249834	0.281838016898974	0.237483757801207
2210408F21Rik	0.0613141099168993	0.0915713836059509	0.319587400455822	0.110562636837595
2310016G11Rik	0.0350034192868689	0.0199488367688993	0.00866889846554805	0.0141950071779594
2410017I17Rik	0.000187802662147642	0.000223854326806967	0.00465339658951163	0.00264821134344851
2510009E07Rik	0.225186019475111	0.230992141137981	0.526197409727153	0.40286332810913
2700046G09Rik	0.061608483593258	0.0420866425849743	0.0923104597415018	0.0632145768670987
2810403D21Rik	0.16008324355675	0.150090523795502	0.304337157233873	0.233110020093539
4930432B10Rik	0.0129999474339645	0.008323427640204	0.0360348985404642	0.0334456111542537
4933400L20Rik	0.00468451794661323	0.0018639233488986	0.0105167826271858	0.00746605352679632
4933406C10Rik	0.0375392368611135	0.0310789987318298	0.0670432330421038	0.0802767013204185
5031434O11Rik	0.0539264631164827	0.0317298722132481	0.068496106014948	0.0738723159239021
5033406O09Rik	0.0153455240702384	0.0212647156390287	0.0623798036454795	0.0298712317125178
5330413P13Rik	0.00959525987521513	0.00424468685394493	0.0206195556344972	0.0329995117977426
5430402O13Rik	0.0288181005613389	0.0215568981675901	0.043207763547065	0.0409990100487143
5430427O19Rik	0.00306303564977469	0.00171493726521938	0.0126683405528866	0.00712269065611398
6030407O03Rik	0.0228390877521854	0.0253475226803174	0.140466425750139	0.0305424017688524
6330408M09Rik	0.010153184403059	0.00691628814924021	0.0178743606447705	0.00918110163265333
6330411D24Rik	0.00636558673244398	0.00861941539664117	0.0224455078270803	0.010893213383776
6430503K07Rik	0.0460654028442719	0.0261475475906701	0.0506251877803102	0.0380066922485738
7630403G23Rik	0.028635598988049	0.0207531907008926	0.00558148304686453	0.0251603856913143
8030443G20Rik	0.00474683017457625	0.008323427640204	0.0221414139025314	0.0126023988177189
9330175M20Rik	0.204786128809045	0.17589460721452	0.0638394628576636	0.0864288615770142
9330185C12Rik	0.00686313895684841	0.00817540090221934	0.0294142664571794	0.00723715804662571
9330199G10Rik	0.29776220969922	0.31790936747485	0.584539551225462	0.263863380183733
A330015K06Rik	0.945313881882686	0.969983742665446	1.69755292719902	1.68074875470601
A330041J22Rik	0.00281334330845474	0.00335256463048135	0.0099012005704675	0.00723715804662571
A330072L02Rik	0.0161466968080552	0.0243283826044505	0.140466425750139	0.00872404299692943
A630001O12Rik	0.0205723763858608	0.024983663302595	0.0883331339754463	0.0173726348324214
A730063M14Rik	0.0196519736348921	0.0183381853432652	0.036934325387413	0.0274064136243361
A930003A15Rik	0.0336725631253182	0.0354101746036283	0.0142023383650009	0.0332225863515774
A930007I19Rik	0.0264429782184537	0.0257839792460045	0.0532820490878871	0.037118357276789
AI197445	0.0089129291223567	0.00699039750708794	0.0282057916519565	0.0200883020728323
AY036118	3.40846310687705	3.23256448996277	4.30678047848561	3.41147547584773
Abca1	0.311014950643158	0.434828772482683	0.881367018824212	1.05460703088403
Abcb9	0.024245539296704	0.0197293551814772	0.0571073183716777	0.0328879558572034
Acot11	0.0506585280020941	0.114593289482936	0.248688110824958	0.133724308331675
Acsl3	1.43574486226371	1.16039143066276	0.693775458458174	1.13760909922934
Acsm3	0.0251006727558863	0.0177518501291597	0.0547550386921002	0.0249355051932682
Adamts1	0.517621246965178	0.46897495479254	0.161058374371282	0.65222168790628
Adgrg2	0.118918255172923	0.17958059723092	0.0760172054375936	0.0936988527295969
Adgrv1	0.375883941853644	0.402423872848084	0.207350274184402	0.18952795301686
Adhfe1	0.0186692760640931	0.0353381418450578	0.10246581629012	0.0314365950216678
Aebp1	0.509755364559373	0.289768081668497	0.139114510663607	0.553721222514586
Aff3	0.10238405643014	0.0988988787720467	0.437697727992762	0.193336171221953
Agbl4	0.0186078253900229	0.0417288242806312	0.148539758486563	0.0272942319572269
Aim2	0.062196971105868	0.0813732007251837	0.222150651220287	0.106321446776144
Angpt4	0.0043728985512813	0.00595236637369778	0.0172632925389303	0.00815242577625869
Anxa4	0.129149392169706	0.100452453147173	0.196423863312139	0.346106517799444
Anxa5	0.190606387077861	0.174203256091996	0.401523040808497	0.251478065786091
Aox1	0.0219820173174987	0.0188509467926951	0.0664614923021279	0.0695798248026919
Aph1c	0.0217370050688764	0.0179717661241888	0.0354348309008378	0.0230219763869575
Apod	3.08472199117171	3.43227130336226	4.60180374691737	3.48970459265721
Arhgef33	0.00505833308548875	0.00454188415336674	0.0163459896762878	0.00746605352679632
Arhgef37	0.153231597218461	0.163424418242342	0.42089726995883	0.302086986711998
Arrdc1	0.0118250927357753	0.00713859974822746	0.0190953777833498	0.033891511594862
Atxn1	0.447102084581266	0.455721057819238	1.0874686700172	0.629075195818874
B230311B06Rik	0.017254954304045	0.0140794454595018	0.0318268436382309	0.0173726348324214
B4galnt1	0.0144820042155006	0.0312236738982122	0.0083605855167091	0.0113492818817667
BB365896	0.00300061840916383	0.0104673566283974	0.0399265857207351	0.00746605352679632
Bahcc1	0.148925355800835	0.10018243961799	0.215655431096672	0.167149639606888
Barx2	0.0021263677228724	0.0023107484650978	0.0215329484934071	0.00986629813241247
Bhlhe41	0.279088244365178	0.219494045069938	0.570401852094071	0.426170478420505
Btc	0.257545709502114	0.209316037903662	0.0655882461577671	0.120525627955454
Btg2	0.055112160345537	0.0802030119807887	0.0233572351554127	0.0708695079209607
C330002G04Rik	0.0238788295568881	0.015109078943759	0.0754406633669306	0.0400025653360652
C530008M17Rik	0.0878681251981404	0.168040130328804	0.511017436250158	0.1809060640899
C630043F03Rik	0.257061675698295	0.161838784771312	0.0722637265766708	0.130390336267075
Cacna1b	0.00468451794661323	0.00935900172619192	0.0306212826136105	0.00712269065611398
Cacybp	0.653208550911232	0.662454517178931	0.357487028401506	0.44000235830347
Card10	0.0155921071314966	0.0257112497125468	0.0541661031886316	0.0194100763417974
Carns1	0.278993519204359	0.266659150715478	0.495224540228124	0.465007121022593
Cavin2	0.215290525957579	0.271733401553518	0.114739476410377	0.203828641015464
Ccdc122	0.013926490292057	0.00884134873490292	0.0330309530353172	0.0325532133477768
Ccdc142os	0.00947123436288427	0.00580398821275001	0.0126683405528866	0.00758048162245147
Ccdc149	0.0167009790853769	0.0186312240798229	0.0420158532695457	0.0309895983429535
Ccdc150	0.0128145357999844	0.00713859974822746	0.019400399259684	0.0280792394761375
Ccdc187	0.125897843284363	0.103552379812171	0.26026019981993	0.133118957771085
Ccl5	0.000876110827605746	0.000969673712028582	0.0200101632398623	0.00551876987244738
Ccnd1	0.084766940527706	0.0881607559895335	0.0263903367528096	0.0365627469175868
Cct6b	0.012505439995165	0.00773118917134717	0.0212285768961955	0.0258347239171435
Cd44	0.0541637150591987	0.0601676603747674	0.13613384836148	0.104557615485796
Cd74	0.000438151360072585	0.00208736086358355	0.0576945247417006	0.0178257584905385
Cd86	0.00125135205348273	0.000149241785594997	0.00465339658951163	0.000461062555624696
Cdh18	0.0103390900938236	0.058409396226606	0.433675162199737	0.198170710557298
Cdk8	0.884898618708414	0.71841930062122	1.29580954540654	1.00119913087634
Chadl	0.103457247326217	0.0668210110358425	0.0230534183973568	0.127045211640052
Chga	0.00125135205348273	0.00193840806774496	0.0142023383650009	0.000691514140927223
Chst8	0.450180090679761	0.289209393490423	0.506343183050401	0.485578208070194
Cirbp	0.255850565182231	0.156109595756238	0.358791104909383	0.328332093846348
Clhc1	0.0298516474860407	0.0198025210632114	0.0438031863650088	0.0413309377634384
Clic5	0.0241844303445871	0.0203145323992683	0.0968366885322037	0.0779331863885037
Col13a1	0.000750999122238505	0.00208736086358355	0.0160400349723916	0.146253147223557
Col6a1	0.000312984845418912	0	0.00279463563750286	0.140559458936083
Col6a2	0.00250114018182082	0.0023107484650978	0.0269958546681945	0.17955817495669
Col9a2	0.016269897200826	0.0143001704705414	0.0306212826136105	0.0383396145184611
Colgalt2	0.00268847375405276	0.00454188415336674	0.0372339546553679	0.0331110552949421
Cox7a1	0.0106488561303249	0.0129014218749188	0.0248749359168329	0.00872404299692943
Cp	0.0656620157866711	0.0696092323859787	0.0384315747563943	0.042436568437907
Cpsf4l	0.0105249612300862	0.00987638689149648	0.00248450596577076	0.00494531699670801
Cpt1a	0.0440305358452616	0.0546716205403988	0.117784497117324	0.0608306854187667
Crmp1	0.0324611549906803	0.0340406641309159	0.130145737573308	0.0731224588302677
Cryab	3.46126096770065	2.92795953591422	1.96060522515971	2.92561577853846
Csmd1	0.0905594984484852	0.127749136179743	0.0345340537485413	0.0739793924797263
Cstad	0.0132471094819828	0.0109103548517031	0.0318268436382309	0.0215562150351317
Ctnna2	1.58733492657225	2.20143969813518	2.87262443514053	1.84860319523199
Cyp46a1	0.0944406235794111	0.0537526699731892	0.0215329484934071	0.0480563482723842
Dcst1	0.00387410544876282	0.00476472417819338	0.0269958546681945	0.00506003388272924
Dcst2	0.00312544899471677	0.00357566981138403	0.0482575926674729	0.0154445653803883
Dglucy	0.00593002536832515	0.00802735224907545	0.0336324644651627	0.0128300696465276
Dhrs13	0.0336120275592775	0.0339685326515862	0.0099012005704675	0.0239229166634762
Dhtkd1	0.103231408093262	0.0883657220080468	0.187956754829458	0.127045211640052
Diras1	0.0214306553153637	0.0303553087697117	0.0889022928056708	0.0423260603631077
Dlc1	0.00412353309934163	0.0231623778558124	0.113907404473134	0.01408133351503
Dlk2	0.0229614664428549	0.0260021361142523	0.0099012005704675	0.0555005955273544
Dnah7b	0.0507775493055304	0.0487188308105952	0.116678289373827	0.0644043948706864
Dnaja1	1.093938661891	1.14141072339738	0.686758933718575	0.875994259687096
Dthd1	0.0021263677228724	0.00134237491584284	0.0068175933054513	0.00207310949863005
Dus4l	0.147251689445425	0.146551852379331	0.0702367718533941	0.125520993427523
Dusp11	0.736826747191269	0.763171450699894	0.432666987369754	0.759624288486495
Dut	0.0758696295279302	0.0594647256511133	0.0266931415419946	0.0551733387137422
Duxbl3	0.00549427420783344	0.00260852099627255	0.0111319859757496	0.0104369367924021
E230016M11Rik	0.124129859135476	0.0855608769081534	0.204566489581655	0.21477037264713
E230029C05Rik	0.0878107831658904	0.075646903780031	0.167390920035899	0.134026846248916
Ears2	0.0479767966709	0.0531159783754231	0.0239645918977967	0.0477266457846772
Eef1b2	1.06918771540186	1.28589271443205	0.755825263589238	0.81868787662384
Eef1e1	0.19241571407577	0.253888666941208	0.120268999456596	0.151617427361457
Eepd1	0.0152838688032514	0.015109078943759	0.0399265857207351	0.0211047789670347
Efcc1	0.0282704958905935	0.0203876554800851	0.043207763547065	0.0297593262277733
Efemp2	0.00343745730141134	0.00521025531012245	0.0148152792139172	0.00264821134344851
Eif5a	0.561740874944934	0.818822964993115	0.438099096045083	0.513422664451258
Erp27	0.0110204487579793	0.0154765484162891	0.0594540778141664	0.0274064136243361
Ets2	0.0133088904499984	0.0154030653236942	0.00341460658878367	0.00883832724197067
Exd1	0.0140499645021094	0.00535872158768328	0.0203149058570654	0.0208789844870327
F8	0.108693682534072	0.107045112166465	0.277606656804208	0.233201335017086
Faah	0.0847094203860778	0.107447335862882	0.294657337597543	0.166271343347473
Fam136a	0.0598999087646773	0.0650044893234144	0.0227495093066256	0.05277017740158
Fam53b	0.447862473495983	0.282143047728441	0.562283144701005	0.515421546776982
Fam71e1	0.0268696978340878	0.0177518501291597	0.0372339546553679	0.0451953088370707
Fam83d	0.0519669838545335	0.0837094781835176	0.190015980037223	0.0797445663424703
Fam83f	0.000312984845418912	0.000223854326806967	0.00403419341421862	0.00460108735771902
Fbxo47	0.0179316186295384	0.0105412032952501	0.0230534183973568	0.0324416076061036
Fcer1g	0.00387410544876282	0.00350130694827066	0.0309228091512705	0.0066646900212196
Fchsd2	0.151242265238763	0.17939350150448	0.0820509129323886	0.193051057370497
Fggy	0.409116453257143	0.296170660964339	0.569346620790336	0.51024380531614
Fhit	0.308626748817732	0.288482631907792	1.03706288603097	0.586640131365792
Fignl2	0.0133088904499984	0.0103935045078117	0.0360348985404642	0.0377846824764569
Filip1	0.0124436093677212	0.00787928167428234	0.0206195556344972	0.0132852558611069
Fndc4	0.0269915842867088	0.0517705189563888	0.0102090389664845	0.0254976116457332
Fndc9	0.00965726686348459	0.00580398821275001	0.0212285768961955	0.0133990200479792
Fxyd1	0.0175625857599291	0.0251292229413069	0.227861465391962	0.108392567176722
Fxyd7	0.0021263677228724	0.00469044968730084	0.121371244435914	0.0616982127087863
Fzd5	0.0284530641018551	0.0297035397144074	0.0768813957708666	0.0366738936884012
Galnt12	0.0449886361303857	0.0379999042709704	0.116954956052311	0.0764389941148411
Garnl3	0.178005803957255	0.423410667671068	1.21141701921069	0.480671047384206
Gas1	0.00754686930048163	0.00335256463048135	0	0.00310805480359636
Gas6	0.0434312566822316	0.0496424167486974	0.132872052054522	0.103934343260573
Gdpd5	0.203714274373676	0.21523068913738	0.447683914917345	0.228625343395829
Ggct	0.24742924327034	0.321865674983217	0.164229659837039	0.257645345450382
Gipr	0.0508370546453935	0.0364180887872594	0.110015221455822	0.0809148897379524
Gk5	0.127883096323594	0.0970720324727785	0.186925549886321	0.141760827138452
Glt1d1	0.0319761805352361	0.0205338856027185	0.0623798036454795	0.0563727571396661
Gm10010	0.0225330754870904	0.019656183946105	0.0626719059860781	0.0438720632191794
Gm10538	0.0412708731733945	0.045301258820317	0.0178743606447705	0.0199752963899387
Gm11250	0.0306412867557891	0.0160642188464194	0.00341460658878367	0.00632105183448125
Gm11613	0.0182390420245864	0.0178984661660528	0.0354348309008378	0.0275185827081304
Gm12326	0.103400792299363	0.0542475944410628	0.159203802784392	0.0687191110834395
Gm13270	0.0174395445337961	0.0138586717181756	0.0387307558073495	0.0392268657477681
Gm13572	0.0356681837646054	0.0296310947011188	0.00866889846554805	0.0102087204023369
Gm13844	0.00150143466801437	0.00171493726521938	0.00866889846554805	0.00207310949863005
Gm13920	0.0108346697042871	0.0123855998560889	0.0315255896088264	0.00425673918388128
Gm14027	0.00349984728254893	0.0018639233488986	0.0099012005704675	0.0115772381550419
Gm14401	0.00487144298327064	0.00342693855491064	0.0114394457800317	0.00838111187557035
Gm14412	0.0129381473756118	0.012680387874908	0.051216211733777	0.0393377168208507
Gm14532	0.00293819727239786	0.00372437895016031	0.0197053277262864	0.00448631780767617
Gm14762	0.00381173881394425	0.00305501360561281	0.0175688732673784	0.00883832724197067
Gm15564	0.408117897522511	0.287139528986611	0.986766718626427	0.497496449230475
Gm15608	0.00698748834159888	0.00743493835506473	0.0212285768961955	0.010779163752104
Gm16126	0.0416913134351928	0.0265109838014328	0.0880484330360572	0.0513474082069398
Gm16170	0.00381173881394425	0.00223629147579103	0.019400399259684	0.00620647952562365
Gm16172	0.0131853246968434	0.0133433433608249	0.00496285445677084	0.0111212736325805
Gm16861	0.0110204487579793	0.0160642188464194	0.0381323041693498	0.0119190751619414
Gm18280	0.00162645252619685	0.00119331110264537	0.00774367430178797	0.00287815950552318
Gm19412	0.00661439378942288	0.0101719154156	0.02911228464186	0.0225712016807448
Gm20627	0.00574329812098778	0.00602654719895876	0.0157339866315652	0.00872404299692943
Gm20632	0.00312544899471677	0.00260852099627255	0.0215329484934071	0.00345279868385671
Gm20754	0.18192794886077	0.112794916237861	0.246746342705921	0.227983030312654
Gm24362	0.00860262480411404	0.00632321548429732	0.0126683405528866	0.0139676469289299
Gm26608	0.00318785844447634	0.00312940966254898	0.00959326738079057	0.00287815950552318
Gm26881	0.0247953518870834	0.0131960578971905	0.0315255896088264	0.0451953088370707
Gm26917	0.688889807819881	0.71455534657464	1.2572930636556	0.882645920891462
Gm27241	0.0798658784930701	0.0662624326490798	0.0227495093066256	0.0375626234050559
Gm28782	0.0112681004868681	0.00965468316932244	0.0236609596368806	0.00872404299692943
Gm29642	0.0411507149091956	0.0342570273564565	0.101623464525731	0.0664562065161415
Gm30015	0.0236954242461361	0.0128277493032295	0.024571579981864	0.0156715901228034
Gm30097	0.0230226501724439	0.014447293416141	0.00465339658951163	0.0160120306277306
Gm30606	0.0135559761602536	0.00898927693490734	0.0190953777833498	0.025047951763696
Gm31718	0.00642779430051858	0.00580398821275001	0.024571579981864	0.00563342099636896
Gm32031	0.0398881806714818	0.0368497412156907	0.0690766646836871	0.0611560963546321
Gm32592	0.00150143466801437	0.000969673712028582	0.00527221658948348	0.00333789726196883
Gm32633	0.0827517643652747	0.0686342389794375	0.160528847644855	0.137248235010851
Gm33037	0.0118869616171367	0.00972858987157503	0.0239645918977967	0.0169193057601733
Gm34006	0.00106374904129133	0.00156592898137948	0.00558148304686453	0.0133990200479792
Gm34552	0.00381173881394425	0.00335256463048135	0.0099012005704675	0.00551876987244738
Gm34933	0.00218883955395365	0.00171493726521938	0.0114394457800317	0.0146495726567093
Gm35850	0.0019389288098367	0.00156592898137948	0.0102090389664845	0.00780929853988445
Gm36037	0.00455988184103604	0.00245964581424518	0.0381323041693498	0.0141950071779594
Gm3604	0.00903702389381689	0.00824941701020106	0.024571579981864	0.0157850831693482
Gm36855	0.520861930158694	0.303138916906625	0.801914017879006	0.450564448646842
Gm38560	0.0163930824171298	0.0207531907008926	0.0541661031886316	0.0368961501760801
Gm38642	0.0901019035973197	0.0565069921379303	0.459929874390718	0.276709322953334
Gm41492	0.072963785115678	0.0603784444751139	0.134776059304415	0.149336158433473
Gm4211	0.027661694349031	0.0203876554800851	0.0500338143109475	0.0344486076902385
Gm4279	0.0217982637591683	0.0175318857604474	0.039627762279028	0.0141950071779594
Gm44767	0.00804383426806442	0.00595236637369778	0.0342336142965026	0.0144223157460559
Gm45338	0.0237565630872971	0.034329138029988	0.0129753284250096	0.0376736591045353
Gm46323	0.00125135205348273	0.00208736086358355	0.0114394457800317	0.005174737610296
Gm46332	0.00748473131056533	0.00521025531012245	0.0327300615849628	0.0253852156294916
Gm46447	0.0294261987018176	0.0201682701947247	0.0438031863650088	0.026620877546775
Gm46515	0.0270525219423567	0.019656183946105	0.0446956563785763	0.0265086077173493
Gm47059	0.00767113369812432	0.00476472417819338	0.033933084553472	0.0257223657867208
Gm47181	0.00106374904129133	0.00126784578674665	0.0190953777833498	0.00391227239353217
Gm47557	0.00518290708539304	0.00535872158768328	0.0135890215891675	0.00940955263590428
Gm47658	0.0134324409365445	0.0106888802709782	0.00248450596577076	0.00494531699670801
Gm48071	0.00916110326767551	0.0067680529549186	0.0190953777833498	0.00792368736765239
Gm48370	0.207994816075464	0.136120629951426	0.056225861788791	0.0686114697603699
Gm48646	0.00816803692983123	0.0154030653236942	0.0333317539772393	0.0110072500096129
Gm48693	0.00636558673244398	0.00847143246951654	0.0230534183973568	0.0155580841941251
Gm48914	0.00268847375405276	0.0049875145564064	0.0148152792139172	0.0057480589769172
Gm49289	0.0021263677228724	0.00387306597781673	0.0163459896762878	0.0041419301040791
Gm50314	0.000125205693554417	0.00141689849076189	0.0157339866315652	0.000230557850147138
Gm50323	0.174488964174912	0.167977045105302	0.464239417259006	0.268721998699664
Gm6145	0.0663653036776226	0.0861087818750894	0.148807750270574	0.0764389941148411
Gm8013	0.0126909089426463	0.0117957629903673	0.0348344029638257	0.0231346383210032
Gm9776	0.0178701226078043	0.0149620533369411	0.0306212826136105	0.0179390073309207
Gmpr	0.00300061840916383	0.00684217329878851	0.0181797547281242	0.00345279868385671
Grm1	0.00374936828928594	0.00238519991097406	0.0135890215891675	0.00792368736765239
Gulp1	0.00947123436288427	0.00528449120418231	0.0696568864996118	0.0235851591729557
H1f0	0.347099598086891	0.280396821501073	0.681267395278168	0.261469573676953
H2-Eb1	0.000563302210030543	0.000895116799623633	0.0175688732673784	0.00563342099636896
H2-Q6	0.000125205693554417	0.000671412704206344	0.0187902632405266	0.0178257584905385
Hcn1	0.0322793171313007	0.0448018856160386	0.203298566593703	0.0258347239171435
Hexb	1.42503671311168	1.03853128073525	2.52993591760916	1.57766069748515
Hilpda	0.0343987042266474	0.0289063557663704	0.0135890215891675	0.023359924118109
Hist1h1c	0.276432542220928	0.178894408365052	1.21141701921069	0.380577176235305
Hist1h1d	0.00168895559472722	0.00171493726521938	0.00774367430178797	0.00287815950552318
Hist1h2be	0.0883267431226783	0.0703050746993421	0.152552113668149	0.115299731024002
Hist1h4h	0.0809634964288586	0.114925966943512	0.303648840328	0.124707126101462
Hist1h4i	0.00331266566039249	0.00372437895016031	0.0178743606447705	0.00712269065611398
Hist2h3c1	0.025222775006355	0.0372812074006926	0.0739978522579171	0.0156715901228034
Hmgcll1	0.118084097574048	0.147968823963051	0.290712520585981	0.506360200927712
Hmgn5	0.170590265117381	0.165576852837176	0.0734201444321905	0.133724308331675
Hoxc9	0.002251307482549	0.00350130694827066	0.0114394457800317	0.00437153508407177
Hpn	0.000187802662147642	0.000298461301402967	0.0163459896762878	0.000691514140927223
Hsp90ab1	3.09389267419094	2.93157859706478	2.12146843035862	2.61260539896763
Hspe1	0.709056227136652	0.83498047632294	0.460322419362324	0.609775941600624
Htatip2	0.0065521978285267	0.0067680529549186	0.0148152792139172	0.0224584762473723
I730030J21Rik	0.0653688331228893	0.0584797861812115	0.0169576184023561	0.0465168057896555
Ier2	0.0191607455613022	0.0309343026315149	0.00496285445677084	0.0297593262277733
Ifi27	0.566406588406059	0.895292547463818	1.47470768783549	0.965141491247025
Igf2bp3	0.0981364944627015	0.10583746946182	0.0518068865842482	0.0600709811784862
Igfbpl1	0.000375570061077796	0.000223854326806967	0.00341460658878367	0.024373082599426
Ikzf4	0.0178086228040769	0.0350499589123775	0.0132822220845003	0.0322183587482803
Impdh2	0.317644390522496	0.449075276332925	0.211888908295096	0.237574674227482
Inca1	0.0257720507101474	0.0173118729967662	0.0357349097307968	0.0384505639824809
Inka1	0.00642779430051858	0.00750900928746778	0.0203149058570654	0.00700821016131874
Iqank1	0.00866469337134223	0.00943293028370807	0.0279034446234161	0.0115772381550419
Isoc2b	0.0210016079309495	0.0141530258765956	0.0357349097307968	0.025047951763696
Itih3	0.398875693162104	0.401625113781598	0.143703584479842	0.264483062417245
Itk	0.0058055444109656	0.00238519991097406	0.0132822220845003	0.0183918744830077
Izumo4	0.128048356311396	0.0903448972872335	0.210882101618577	0.162162396829296
Jhy	0.00231377150914601	0.00521025531012245	0.0330309530353172	0.0383396145184611
Jun	0.795398010368785	0.760698320559369	0.378363904789831	0.693861016876839
Kcnma1	0.403235608040073	0.561317764490292	1.5126194222706	1.25782197817841
Kctd11	0.0243677459991666	0.0497134265015901	0.0169576184023561	0.0287516129376748
Kctd16	0.702751292167992	0.557479000070309	0.962123246428124	0.868088932520377
Kif9	0.0220432610009592	0.0297035397144074	0.0641311392015455	0.0360068276838915
Kirrel2	0.020020236398461	0.0272374602051829	0.00866889846554805	0.0067792098468738
Klf11	0.0289397497757004	0.0160642188464194	0.0354348309008378	0.0449748894607641
Klhdc8a	0.0554083651145319	0.0303553087697117	0.0974010293687436	0.104453763754819
Kmo	0.0193449843679878	0.0214838605385566	0.00928523933905549	0.0106651011116298
Lars2	1.26595206658675	1.31048466576391	2.28967170203004	1.56616951356495
Lcat	0.0420515501614458	0.0546716205403988	0.110850536925203	0.0825085811833974
Lgals1	0.00823013247633065	0.0141530258765956	0.0452901941930419	0.024373082599426
Lgals3	0.00162645252619685	0.00342693855491064	0.0390298473757742	0.0411096648625191
Lmo7	0.00262603312921287	0.00847143246951654	0.0351346619965445	0.00792368736765239
Lncpint	0.694938804591172	0.652322589968296	1.17252202354091	0.843743019736999
Lpar3	0.00118882162654743	0.00275737401777921	0.0491460978595742	0.00149767672135069
Lsm11	0.0218595186970628	0.0222139968875891	0.00959326738079057	0.0240354771472674
Lsm7	0.4077015381664	0.451453843046654	0.219158098716462	0.316976507162482
Lyn	0.0257720507101474	0.0280359751492724	0.007126382272479	0.0120329948686074
Lynx1	0.0154071755360878	0.026874287974302	0.0509207434207071	0.0169193057601733
Lyz2	0.0023762316342321	0.00283179222039875	0.0544606142959937	0.0141950071779594
Mageb18	0.00281334330845474	0.00245964581424518	0.0203149058570654	0.0047158437372238
Majin	0.00318785844447634	0.00476472417819338	0.0315255896088264	0.0133990200479792
Maml3	0.249187509998529	0.390071882942656	0.6520528927213	0.320078685470307
Man1c1	0.0316122952811003	0.026874287974302	0.0690766646836871	0.0667797922806521
Maob	0.0353056397421257	0.0465129851190971	0.150146632954108	0.0313248645824091
Map3k5	0.0747664031149107	0.0732916914824308	0.150681684500494	0.225593677413944
Mcam	0.73529733791031	0.4553424863347	0.164757231022122	0.820516623889537
Mdk	0.0065521978285267	0.0100980414720248	0.024571579981864	0.00883832724197067
Me3	0.0043728985512813	0.00787928167428234	0.0318268436382309	0.0284154827176641
Mecom	0.00791961617808017	0.0062490566636864	0.000310901028810344	0.00723715804662571
Metrnl	0.00791961617808017	0.0120907249116685	0.00279463563750286	0.00528942818242661
Mettl1	0.178267759415899	0.300379544313075	0.137489796326952	0.138754696129653
Mettl27	0.00692531558206983	0.0062490566636864	0.0175688732673784	0.00838111187557035
Mfsd4b1	0.00206389198881765	0.00238519991097406	0.0142023383650009	0.00218815633000769
Mfsd7a	0.0146054098571894	0.0238184228092645	0.0742865810640887	0.0438720632191794
Mgp	0.000312984845418912	0.000522248833799772	0.124121553193218	0.165099080416333
Mgst1	0.0303376531304171	0.0156969653010384	0.0482575926674729	0.0344486076902385
Mocos	0.00112628728931333	0.0021618289422282	0.0114394457800317	0.00597729551994513
Mrgpre	0.00412353309934163	0.00476472417819338	0.0111319859757496	0.0137402349754619
Mroh3	0.0350034192868689	0.0334634665611063	0.108621476573649	0.104869105983312
Mt3	0.315500347910049	0.508118317263322	0.922498304134207	0.230824432805682
Mtcl1	0.0689398024970152	0.0521247627719108	0.149343518475995	0.0893853778947959
Mylip	0.0290613841933305	0.0423728050725905	0.101904327294182	0.0510187891843352
Myrip	0.0529175139193473	0.0292687908895586	0.0635477014138699	0.116737012551224
Nap1l5	0.991032228671199	1.10470942123102	1.81603829932963	0.895629662380102
Nbeal2	0.00829222416721258	0.0131224070296966	0.0321280069409763	0.0143086679206558
Neat1	2.15246351559916	2.12044979485857	2.9978569659679	2.26728345086007
Nlgn2	0.0891288187309929	0.107916392456498	0.02911228464186	0.140859936321787
Nlrx1	0.0203270184719952	0.0143001704705414	0.0372339546553679	0.0314365950216678
Nmnat3	0.0409103550580963	0.0357702605862564	0.0928773599777384	0.074514603345508
Nol3	0.0577157560959427	0.0426588856946637	0.074575226529999	0.171335329462809
Nop16	0.104078042359387	0.142547732504756	0.0609180107133963	0.0845236177447835
Nos1ap	0.283671677085828	0.307373514626022	0.594198199709613	0.356007900164103
Nox4	0.000938660810926858	0.00298061201349156	0.0312242447980828	0.004830586949213
Npb	0.00231377150914601	0.0103935045078117	0.10106150222631	0.0516759192745575
Npm1	0.837077957077685	1.03479969341465	0.617273702050981	0.702750161833241
Npm3	0.108188127441941	0.130634748787034	0.0541661031886316	0.0904391618006596
Nppc	0.0377804082631286	0.02883385297596	0.0083605855167091	0.0222329872523937
Nptxr	0.013864747469355	0.0128277493032295	0.0461813386736437	0.0223457381055438
Nr2f1	0.0225942854320484	0.0165047451397251	0.00589065388807404	0.0386724259879974
Ntsr2	0.0288789270183361	0.0461567474225405	0.0172632925389303	0.0195231459122111
Nudt12	0.00785750134630862	0.00906323282968661	0.0402253198936679	0.00815242577625869
Nupr1l	0.00965726686348459	0.00550716582628054	0.0154278445964762	0.0131714787304719
Nxpe4	0.298041075643406	0.355007759506288	0.639664710818187	0.447179008862289
Nyap2	0.0671266411488408	0.0325248093671291	0.0114394457800317	0.0163523552723628
Opalin	2.52786392450122	2.02026696873104	1.1252130440955	2.3359023315716
Osbp2	0.346878341667699	0.349761452991284	0.683153607686936	0.412831503167783
Osbpl3	0.00374936828928594	0.00891531557024917	0.0381323041693498	0.0226839144085262
Pabpc1l	0.00218883955395365	0.00446759310868563	0.0172632925389303	0.00460108735771902
Pacsin1	0.190140601949416	0.219973285791213	0.460518634078912	0.246804997360188
Pald1	0.0366343257293481	0.0448732399148079	0.111963206599363	0.0685038168493984
Palld	0.00462220183559448	0.00906323282968661	0.0357349097307968	0.0067792098468738
Palm	0.012629089782155	0.0254202786713216	0.090891801535282	0.0221202236850551
Pappa	0.00443523019936365	0.00817540090221934	0.0390298473757742	0.0412203074331908
Paqr6	0.0832127342153787	0.0800652526474208	0.28815167450631	0.106010408410942
Pbld2	0.00922313718169823	0.00617489234313694	0.0148152792139172	0.0141950071779594
Pde3b	0.0602536465936312	0.087887402597922	0.0151216088097394	0.0764389941148411
Pdzrn4	0.380858497342678	0.294559958676982	0.752021285204382	0.350176324576587
Peg10	0.239724899173581	0.141447022102683	0.0446956563785763	0.151914600872112
Phlda1	0.27210192720629	0.208286456899263	0.0606253955313166	0.299868482417269
Pik3r3	0.455037616826911	0.308744536830077	0.760341945130241	0.869249720511294
Pir	0.0312482775662843	0.0180450607098348	0.0494420909120552	0.0390051267309095
Plxna1	0.0240622012363001	0.019656183946105	0.0366346063148511	0.0566996217348331
Pnmal2	0.0700494721574242	0.0679372326504357	0.0315255896088264	0.0362292324642869
Pnpla7	0.252646167875326	0.350970543017413	0.637858902827565	0.344228830190843
Podxl	0.0021263677228724	0.00528449120418231	0.0190953777833498	0.00345279868385671
Pole	0.0176856118487814	0.015990778926564	0.0342336142965026	0.0295354776827635
Poln	0.024856423518966	0.0209724477148856	0.0441007648786081	0.0534261579862123
Pqlc1	0.0217982637591683	0.0350499589123775	0.0105167826271858	0.0268453793991566
Pqlc3	0.00412353309934163	0.00424468685394493	0.02911228464186	0.0308778179466035
Ptchd1	6.26048063354194e-05	0.000149241785594997	0.0384315747563943	0.00207310949863005
Ptprs	0.205347118198899	0.180640145653569	0.326565548113624	0.580529652935029
Pus7l	0.0446294560878591	0.0622033812846487	0.0276010061535024	0.0486056109696984
Pycard	0.00667658588222208	0.0100980414720248	0.0260874402451107	0.014763181747831
Rab36	0.00897497843302583	0.00699039750708794	0.0215329484934071	0.0202012949868844
Rab3il1	0.0149755354348433	0.0103935045078117	0.0257844519633187	0.0166925641355334
Rab40b	0.0359098067789715	0.0208262817138691	0.045587330599587	0.0443133396736234
Rack1	1.12337854878973	1.38009578650103	0.814111052791649	0.848442715301494
Rangrf	0.0510750406023111	0.0643749237544728	0.0263903367528096	0.0478365586925476
Rapsn	0.0107727356825187	0.00632321548429732	0.0160400349723916	0.0304305713707175
Rbbp8	0.0520858495349393	0.0474386096502544	0.0197053277262864	0.071942974744562
Rbpjl	0.0329458943599083	0.0368497412156907	0.0117468110818374	0.0217818566692268
Rell1	0.23834461727888	0.210344559961195	0.394002571247585	0.327667675794999
Renbp	0.0160234812350773	0.00965468316932244	0.0221414139025314	0.040334823908278
Rftn1	0.307890768558092	0.2935589059643	0.681110050197882	0.390846852936414
Rgs17	0.013494210456018	0.0213377692750554	0.00465339658951163	0.0190707909019459
Rgs2	0.0401889286731204	0.0253475226803174	0.00897711638681007	0.0318833919836208
Rhbdl1	0.0279661414497261	0.0567890582509351	0.156814288551341	0.0257223657867208
Rhbdl3	0.03934660623098	0.0319467359330191	0.0148152792139172	0.0589846872481951
Rnase4	0.0065521978285267	0.00253408617573634	0.00774367430178797	0.0764389941148411
Rnf144b	0.0108965998904699	0.0123118892712613	0.0327300615849628	0.0472868733048726
Rnf152	0.00325026399953956	0.00402173090092757	0.0272984761868878	0.0111212736325805
Rpl10a	0.931671477892283	1.14141072339738	0.619619171247068	0.721023919043031
Rpl12	0.980754337297104	1.18009681083747	0.619953789646435	0.733614184993795
Rpl13	1.91872788569756	2.14182453249706	1.4258568858378	1.50172667800989
Rpl14	1.50255279341713	1.64441162730545	1.03629097965183	1.18886799628045
Rps18	1.1742221114978	1.45645651800924	0.906172850826413	0.956939161961246
Rps2	1.54353099389233	1.7464010855361	1.08263569103288	1.2484704571582
Rps5	1.60695738857328	1.82198973162272	1.16372328442841	1.30193224081226
Rps6	1.57255608747459	1.65658767110237	1.05172565230989	1.20658321287963
Rps6ka2	0.0343987042266474	0.0390769820187373	0.112519077517884	0.0462966775365437
Rps8	2.24927268194494	2.37836584585795	1.60145636326571	1.83937504490711
Rragd	0.0102151568068294	0.00617489234313694	0.0266931415419946	0.0225712016807448
Rrp9	0.0898730276253823	0.122547160709088	0.0541661031886316	0.077506502079079
Rusc1	0.00393646819422682	0.00387306597781673	0.0102090389664845	0.0123746761430998
Rxra	0.0334303988707207	0.0465129851190971	0.112241180682682	0.0351167135931691
S100a1	0.817644305516121	0.581629386272005	1.04987731493294	1.13301541181334
S100a6	0.213319854410713	0.171440835987243	0.345673174151504	0.337176506352278
S100b	0.323958513690769	0.495876533159191	1.05681805352097	0.359715903513845
Scn1b	0.00723614073240306	0.0106150445091753	0.0251781998548855	0.0380066922485738
Sco2	0.102271021939721	0.110392043265439	0.0470716897227699	0.0703323420755513
Scrn2	0.0328247315444705	0.0232352929972178	0.00774367430178797	0.0261717225821674
Sema4g	0.0168856715924252	0.0147414743877751	0.033933084553472	0.0589846872481951
Serhl	0.00680095846545388	0.00595236637369778	0.0212285768961955	0.0129438856261295
Sfrp1	0.0266868402950522	0.0148885324265392	0.00341460658878367	0.0199752963899387
Sfxn3	0.0257110349732242	0.0168717021992843	0.0068175933054513	0.0344486076902385
Sh3pxd2a	0.0971143893364701	0.0591834133504518	0.0254813718518038	0.0483859420921879
Sh3rf3	0.00387410544876282	0.00787928167428234	0.00124302457892367	0.0245980895966866
Shc1	0.0488118840094646	0.0622033812846487	0.145318242607829	0.0778265323780118
Shisa8	0.0290005688338819	0.0279634092240772	0.0840540856537931	0.169974469286495
Shld3	0.020940300417624	0.0281085358090362	0.0713955347338248	0.0245980895966866
Shroom1	0.0809634964288586	0.0754393139146365	0.180456314322029	0.0820838450774965
Shroom3	0.422582325649366	0.412008972883441	0.840888205838791	0.439259560391119
Slc12a3	0.000625871761973814	0.00260852099627255	0.0111319859757496	0.00230318992713447
Slc12a4	0.0596640140093255	0.0786176327135912	0.139114510663607	0.0940137435241361
Slc16a6	0.200235603321202	0.16652498546821	0.370022427091177	0.24093278431852
Slc35f4	0.0460654028442719	0.0424443329011736	0.0178743606447705	0.0263963252819937
Slc38a1	0.0970575750751435	0.135208403800176	0.0515115927711093	0.0550642293055389
Slc9a3r1	0.0428316181683242	0.0747470363002357	0.183566770840238	0.0346713592577295
Snhg18	0.0105869105989488	0.00758307473377418	0.0178743606447705	0.0106651011116298
Sparcl1	0.230619402790707	0.235955495670279	0.136405185082054	0.168416929446014
Spef2	0.0909025572250504	0.152271819434116	0.303189699038557	0.149931773976296
Sqor	0.00686313895684841	0.0062490566636864	0.0224455078270803	0.00632105183448125
Srm	0.175067205055626	0.263395771465802	0.125219562209868	0.151815552847358
St3gal1	0.16778858230788	0.081648340362692	0.258100608974443	0.280025898272345
St3gal3	0.796047797390763	1.14623722023332	1.64781976659384	1.16983169444216
St3gal6	0.298923638441788	0.228798061880831	0.460322419362324	0.363891069584944
Stpg2	0.0104630080232616	0.00810137931544785	0.0375334941725159	0.036118036257075
Susd1	0.00692531558206983	0.00439329654443514	0.010824431610862	0.00998045191766191
Syngap1	0.00524518826632291	0.00387306597781673	0.0102090389664845	0.014763181747831
Synpr	0.589622431783843	0.436277063498322	0.167390920035899	1.02646439436147
Syt14	0.0882121083585116	0.1059045989974	0.279254313925431	0.0844176643562288
Tdrp	0.00168895559472722	0.000895116799623633	0.007126382272479	0.00253321743081203
Telo2	0.0748244980163761	0.0802030119807887	0.0348344029638257	0.0696873619467972
Tenm4	0.0327641446311465	0.037137406022819	0.103026990193078	0.0673188693129884
Tgfbi	0.222332909720678	0.135664620895367	0.0473682973317965	0.237120009415593
Thbs2	0.0534517902987955	0.0331025488253971	0.0132822220845003	0.0397809982744259
Thsd4	0.226384897798423	0.24399800672523	0.469697565483735	0.205707526309192
Tigd5	0.0121962486205881	0.00854542667044719	0.0178743606447705	0.0102087204023369
Tmem28	0.0216757426257276	0.0320190133897855	0.090891801535282	0.0148767779333932
Tmem59l	0.0623734498489174	0.0617825375212134	0.0233572351554127	0.0798510159938817
Tnfsf10	0.000375570061077796	0.00164043589873301	0.0117468110818374	0.01408133351503
Tns2	0.0287572704042588	0.0452299350570904	0.13694763775219	0.0608306854187667
Tpcn2	0.0278443737317867	0.0296310947011188	0.0673339765529323	0.0468469073401416
Tpm4	0.0887851508132288	0.0696092323859787	0.0269958546681945	0.0867460496021251
Traf3	0.0588379438748466	0.0630445378554869	0.121646615950311	0.118377094461662
Tspan9	0.196487629736251	0.216433474504768	0.516041209492646	0.39357289974648
Tub	0.0503013790717491	0.0286888316232694	0.00619972917221718	0.0116911968081169
Txnl4a	0.298319863843057	0.317040136318158	0.117231546207514	0.228074814587548
Uap1l1	0.0946115032418406	0.0586909263214354	0.140736589584804	0.135236083455856
Unc5d	0.016269897200826	0.0291963143728967	0.0719744130384275	0.0348940612180097
Vegfd	0.00468451794661323	0.00320380018512359	0.0117468110818374	0.00838111187557035
Vmac	0.0291221958544961	0.0227977223781901	0.0559318701841908	0.0460765008163149
Vmn1r4	0.00760900342950804	0.00379872522746754	0.0120540819392426	0.0123746761430998
Vmn2r1	0.00555653600007356	0.00580398821275001	0.0266931415419946	0.0120329948686074
Wfdc18	0.293849898949468	0.234362816709718	0.042313964051329	0.154190001934718
Wipf3	0.0058055444109656	0.0029062048853615	0.0142023383650009	0.00952375856931216
Yjefn3	0.0535704796281025	0.0454438910873466	0.0178743606447705	0.0428784786572293
Zbtb7b	0.0798658784930701	0.119439426903704	0.222897392160311	0.130187919665187
Zc3h12a	0.0174395445337961	0.0225788652472073	0.0971188987605456	0.0588759929250567
Zdhhc15	0.0168856715924252	0.025056445770402	0.0615029843318276	0.0705472430406121
Zfp13	0.0265039493130217	0.0194366381103245	0.0393288495151794	0.0348940612180097
Zfp428	0.0513129699353883	0.0652841690689971	0.0254813718518038	0.0432097832133505
Zfp692	0.278898785069834	0.28450404880222	0.13694763775219	0.221352324612699
Zfp697	0.0360305963965501	0.0334634665611063	0.0673339765529323	0.0560457856691007
Zfp703	0.013864747469355	0.0310066532987925	0.0854824705333242	0.0548459747680473
Zfp808	0.0323399334250578	0.0374968707021176	0.101623464525731	0.0679653783886542
Zfp977	0.00362461556850902	0.00506176698705299	0.0138957269967669	0.00826677536308101
Zfp979	0.00940921583786896	0.0130487507373528	0.0405239648511456	0.0204272425200043
1110046J04Rik	0.0807325190664714	0.0601676603747674	0.0951417526191549	0.114683120282376
1500009C09Rik	0.0104010509779992	0.0152560829372255	0.0197053277262864	0.00563342099636896
1600010M07Rik	0.196487629736251	0.207437769991792	0.137489796326952	0.121036503876084
1700012D14Rik	0.214431992707298	0.130700234216203	0.147735351947304	0.305320588322945
1700015F17Rik	0.00487144298327064	0.00602654719895876	0.00186395793183908	0.0123746761430998
1700028E10Rik	0.146494920973774	0.0972074689304456	0.181753513847953	0.225961641964712
1700029J07Rik	0.0939848016732137	0.0543182779447768	0.0541661031886316	0.110252915055613
1700030L22Rik	0.0203883635944898	0.0117957629903673	0.00866889846554805	0.005174737610296
1700041B01Rik	0.00325026399953956	0.00223629147579103	0.00650870895834438	0.0114632665139121
1700081N11Rik	0.0139882293028183	0.00876737642805922	0.0166518508005335	0.0189576701694816
1700110C19Rik	0.00698748834159888	0.00491325661192693	0.00959326738079057	0.0131714787304719
2310047D07Rik	0.00468451794661323	0.00275737401777921	0.00403419341421862	0.00723715804662571
2410004B18Rik	0.372956276446198	0.431344292016326	0.278077693064644	0.252911550664717
2610316D01Rik	0.244589961422926	0.14526195175848	0.133144275144548	0.450711382010072
2900089D17Rik	0.011577578925639	0.00876737642805922	0.0114394457800317	0.0190707909019459
3110001I22Rik	0.0155304670662484	0.0244740376498936	0.0206195556344972	0.0130576886531283
3110082J24Rik	0.0346406341341409	0.0607296526058823	0.0393288495151794	0.0182786769205963
3830408C21Rik	0.0149755354348433	0.0116482493973492	0.0126683405528866	0.0388942387816824
4732419C18Rik	0.00978126930661561	0.00869339864890854	0.0105167826271858	0.0203142751349803
4930412L05Rik	0.000750999122238505	0.00104422506611475	0.00310466915864005	0.0047158437372238
4930419G24Rik	1.21438623772636	0.972949798558508	0.737254238267961	0.564399864490835
4930420G21Rik	0.839244176506865	1.29486634361981	1.20872821190382	0.655938136475827
4930432K21Rik	0.0274180699154747	0.0176052125928521	0.0300179566463842	0.0405562683079545
4930445B16Rik	0.0782461371523056	0.102542589650009	0.0737090400633447	0.0449748894607641
4930452G13Rik	0.0216144764292618	0.0167983215591806	0.0148152792139172	0.0373405150124713
4930469K13Rik	0.00349984728254893	0.00134237491584284	0.00372444798747966	0.0215562150351317
4930488L21Rik	0.23116608948668	0.209073878899013	0.34081982129886	0.401398082596736
4930500A05Rik	0.012319936642572	0.015182583641764	0.0184850555744051	0.00620647952562365
4930513D17Rik	0.0255889923294814	0.0245468572176155	0.0300179566463842	0.0533168577670931
4930532I03Rik	0.0214306553153637	0.0180450607098348	0.0117468110818374	0.00803806311211297
4930572G02Rik	0.028209632412499	0.0187044703484746	0.0209241126287077	0.0434305919538576
4930578M01Rik	0.026564916690342	0.0165047451397251	0.0227495093066256	0.0352280211932279
4931423N10Rik	0.00312544899471677	0.00275737401777921	0.00465339658951163	0.00803806311211297
4931428F04Rik	0.0265039493130217	0.0179717661241888	0.0233572351554127	0.0453055003086378
4932438H23Rik	0.0202656695860456	0.0201682701947247	0.0547550386921002	0.0935938670928479
4932441J04Rik	0.0192221622684899	0.0136378492250412	0.0102090389664845	0.0358956067419857
4933405D12Rik	0.00200141235130169	0.00111877086271084	0.00186395793183908	0.00437153508407177
4933423P22Rik	0.0065521978285267	0.00810137931544785	0.0068175933054513	0.00333789726196883
5730405O15Rik	0.0185463709395352	0.0108365354414373	0.0166518508005335	0.0224584762473723
6030443J06Rik	0.236567165074841	0.204461680824041	0.277371055444669	0.367410337690916
6720489N17Rik	0.0454673422591179	0.0372093092966104	0.0529871906241519	0.079212148046117
8030453O22Rik	0.0179316186295384	0.0178984661660528	0.0135890215891675	0.0057480589769172
9330159M07Rik	0.00624115998574642	0.00876737642805922	0.0123612584102694	0.0199752963899387
9430037G07Rik	0.00374936828928594	0.0029062048853615	0.00496285445677084	0.00803806311211297
9430041J12Rik	0.00996724414494205	0.0133433433608249	0.0148152792139172	0.0427680194089854
9530082P21Rik	0.0219207698830198	0.0420866425849743	0.0661704949745436	0.0240354771472674
9630013A20Rik	0.0650755644778244	0.0817858817984698	0.0626719059860781	0.27425847273714
A330076H08Rik	0.275719994228285	0.270082820333118	0.347651867486702	0.475453064638683
A430010J10Rik	0.00903702389381689	0.00802735224907545	0.00897711638681007	0.0205401971448397
A530072M11Rik	0.0391660162194464	0.0327415007810438	0.0500338143109475	0.0678576558978444
A730020M07Rik	0.00218883955395365	0.00305501360561281	0.00650870895834438	0.000576294986767591
A730085K08Rik	0.0089129291223567	0.00824941701020106	0.0166518508005335	0.00345279868385671
A830019P07Rik	0.025222775006355	0.0155500261095158	0.0263903367528096	0.0596366052002491
A830082K12Rik	0.0127527242817653	0.0103935045078117	0.00403419341421862	0.0281913331192842
A930003O13Rik	0.00162645252619685	0.00134237491584284	0.00248450596577076	0.00540410560213833
A930017K11Rik	0.0754052614805169	0.0391487459708251	0.0348344029638257	0.097366423370967
AC163347.1	0.111665667142403	0.0604486959697328	0.0354348309008378	0.159217063724639
AI182371	0.0336120275592775	0.0266563213097547	0.0375334941725159	0.0739793924797263
AU022754	0.000563302210030543	0.000223854326806967	0.000621705428212378	0.00310805480359636
AW047730	0.024123317657938	0.021629930462518	0.0254813718518038	0.00597729551994513
Aard	0.00318785844447634	0.00372437895016031	0.00496285445677084	0.0148767779333932
Abca5	0.399211746930844	0.255392768277777	0.296739487123612	0.649395147534272
Abcg4	0.00854055238413967	0.00595236637369778	0.0132822220845003	0.0160120306277306
Abhd8	0.0131853246968434	0.0169450774550649	0.0120540819392426	0.00803806311211297
Ablim2	0.829431705950151	0.67057838965586	0.582283959844672	1.32563949715765
Abr	0.0147904897701342	0.0175318857604474	0.0215329484934071	0.108806277009136
Abra	0.00680095846545388	0.0127540713034926	0.00650870895834438	0.00437153508407177
Acad10	0.0571246247452779	0.0377843494398344	0.0467749941115668	0.0867460496021251
Acad12	0.0485137185803657	0.0359142586818137	0.0443982548655787	0.07697289054361
Acat2	0.218616686843903	0.252788083512847	0.15840793229131	0.140960075390002
Accs	0.0147904897701342	0.00921112821284424	0.0169576184023561	0.0199752963899387
Acsbg1	0.0364532451977839	0.0494293572306953	0.0658794129428653	0.0208789844870327
Acss2os	0.0235119852917056	0.0170184473273123	0.00959326738079057	0.00895259842761571
Adam11	0.00468451794661323	0.00661979578366636	0.0114394457800317	0.0385615011380828
Adam12	0.0878107831658904	0.058268601451414	0.0351346619965445	0.140859936321787
Adam18	0.0481558026743145	0.0246196714830341	0.0197053277262864	0.091807422836212
Adamtsl5	0.00499604026554771	0.00298061201349156	0.00279463563750286	0.0102087204023369
Adgrb2	0.061608483593258	0.0457290946040195	0.0393288495151794	0.136544442419631
Adgrg1	0.113791100394626	0.102542589650009	0.0957070505177873	0.221075088790669
Adgrg3	0.00181395001310797	0.000895116799623633	0.0015535394501592	0.00746605352679632
Adgrl1	0.109198982169395	0.0894581651515583	0.0509207434207071	0.172985316673646
Adra1a	0.00978126930661561	0.00669392711681608	0.0145088557515188	0.0437617136730868
Aen	0.0571246247452779	0.108853846117015	0.0588679040590619	0.0545185036201044
Agbl2	0.0185463709395352	0.0219950119528337	0.0172632925389303	0.0535354462600991
Agbl3	0.245129065747006	0.185301268514285	0.253767385223697	0.402323750565974
Ahdc1	0.0881547860481282	0.0712784412041701	0.0780324890465263	0.133018030374383
Ahnak2	0.000500728742893468	0.00193840806774496	0.0015535394501592	0.00563342099636896
Ajap1	0.00125135205348273	0.00111877086271084	0.00217428008378695	0.0102087204023369
Ajm1	0.0768556962255031	0.0512034677055776	0.0597470358921739	0.106010408410942
Ak4	0.00605449083210459	0.00528449120418231	0.00465339658951163	0.00218815633000769
Ak8	0.00243868785829462	0.00193840806774496	0.00310466915864005	0.00586268381710523
Akip1	0.0320974462009003	0.0173852159631932	0.019400399259684	0.0434305919538576
Aldh1b1	0.00143891987738527	0.00141689849076189	0.00372444798747966	0.00895259842761571
Aldoc	0.330053006516737	0.519058088610502	0.72768758762827	0.193526201971875
Alg3	0.0609018411338442	0.0810291696884298	0.0541661031886316	0.0418839059030634
Ang	0.00156394555078872	0.000522248833799772	0.00279463563750286	0.00906685655684885
Ankrd13d	0.0158386294045379	0.010762710581464	0.0135890215891675	0.0259470694246351
Ankrd33b	0.000625871761973814	0.000522248833799772	0.00186395793183908	0.0047158437372238
Ankrd42	0.0165778317938875	0.0114269381993077	0.0212285768961955	0.0278550144878457
Anln	1.3594363319612	1.81499035101031	2.03303289857321	1.20899512648439
Ano6	0.00605449083210459	0.0123855998560889	0.0148152792139172	0.0363404163082771
Anxa11	0.00325026399953956	0.00513601390468548	0.0148152792139172	0.0187313903084137
Anxa2	0.0504204428885774	0.0664719361094675	0.0420158532695457	0.221259921211726
Anxa7	0.0326429597910642	0.0200951310694334	0.0285080472944007	0.0680730892765787
Apln	0.179262564807866	0.298720258559816	0.346992737971204	0.160298026722159
Arhgef19	0.0421716002380784	0.0273826921752413	0.0276010061535024	0.107357543168801
Arhgef25	0.00387410544876282	0.00461616967929852	0.00527221658948348	0.0124885439626114
Arhgef40	0.0656033861299974	0.0369216651757549	0.0209241126287077	0.100082223282484
Arl4c	0.013494210456018	0.00743493835506473	0.00650870895834438	0.0387833385349543
Arl4d	0.27405540509924	0.427701667451626	0.335498251068125	0.186566576488361
Armc3	0.00593002536832515	0.00521025531012245	0.00866889846554805	0.0122607953562313
Arpc1a	1.3762086910276	1.74093292353981	1.40088955352192	1.17564833809904
Arpp21	0.00916110326767551	0.0131960578971905	0.00743507591831391	0.0503612269901934
Asap3	0.0208789891454569	0.0168717021992843	0.02911228464186	0.0513474082069398
Asb5	0.0194063897612244	0.0142266008800099	0.0206195556344972	0.0285275386785281
Aspdh	0.00555653600007356	0.00439329654443514	0.00465339658951163	0.0123746761430998
Asphd1	0.182814833818903	0.174579359192707	0.197445324894269	0.0842057238948093
Astn1	0.00518290708539304	0.00684217329878851	0.0102090389664845	0.026733134773101
Astn2	0.132335557777077	0.251396139259288	0.260739476194642	0.564793188154569
Atcay	0.0433713090087394	0.0248380824731901	0.0239645918977967	0.0714063853741321
Atp23	0.0159002504781511	0.00884134873490292	0.007126382272479	0.0226839144085262
Atp7b	0.00256358860529788	0.00439329654443514	0.0111319859757496	0.0137402349754619
Atp8b2	0.0190993250818709	0.014447293416141	0.0132822220845003	0.0352280211932279
Atrnl1	0.040669937420249	0.0392922584266537	0.0494420909120552	0.0919125961817022
Atxn7l1os1	0.0100912081584717	0.0100241620706868	0.0099012005704675	0.0047158437372238
B230206L02Rik	0.181875754654154	0.106843939633021	0.105548382943597	0.217742249983182
BC046251	0.0043728985512813	0.00439329654443514	0.0148152792139172	0.037118357276789
BC051142	0.0299124111104261	0.0222869812106036	0.042313964051329	0.0596366052002491
BC106179	0.0175625857599291	0.0108365354414373	0.0200101632398623	0.0265086077173493
Baalc	0.0369360537673222	0.0512743666990302	0.0446956563785763	0.0128300696465276
Bach2os	0.0152838688032514	0.0141530258765956	0.0123612584102694	0.00769489662581566
Banf2os	0.00704965723591621	0.00491325661192693	0.00527221658948348	0.0148767779333932
Basp1	0.013926490292057	0.0238184228092645	0.0242681319941465	0.0518948667129945
Bbc3	0.0434912007622157	0.0241827063405244	0.0381323041693498	0.0791056303620835
Begain	0.0329458943599083	0.0443736528701964	0.036934325387413	0.0165791740408871
Bex2	0.041931485671062	0.0737077204578043	0.0479612487520288	0.0209918880999271
Bglap2	0.0021263677228724	0.000895116799623633	0.00341460658878367	0.0057480589769172
Bhlhe22	0.00325026399953956	0.0023107484650978	0.00372444798747966	0.0119190751619414
Bmp1	0.196281854811468	0.246858892769334	0.27595628042798	0.473157118036854
Bmp5	0.00356223337141962	0.00245964581424518	0.00527221658948348	0.0138539474167205
Bmp8b	0.0108965998904699	0.0105412032952501	0.00619972917221718	0.004830586949213
Borcs8	0.103287872683245	0.125447801507016	0.096554398638766	0.064512489978272
Brca2	0.068647579390427	0.04779439107289	0.0883331339754463	0.114991473179289
Bspry	0.00362461556850902	0.00238519991097406	0.00558148304686453	0.00940955263590428
C230037L18Rik	0.173963000339998	0.101666612611813	0.141546643433683	0.241838449200667
C2cd6	0.00599226003667133	0.00342693855491064	0.00403419341421862	0.0124885439626114
C430049B03Rik	0.00393646819422682	0.00208736086358355	0.0015535394501592	0.00643561101802868
C730002L08Rik	0.0868928631848457	0.0618526904488718	0.0612105402968781	0.0317717114568194
C78334	0.0132471094819828	0.0120169925874299	0.00805217748167867	0.00643561101802868
Cab39l	0.787168612351468	1.24479571740796	1.08210895704326	0.60330123507408
Cabp1	0.0023762316342321	0.00238519991097406	0.000621705428212378	0.000576294986767591
Cacna1c	0.181196981946218	0.113994191012332	0.112241180682682	0.24400870423221
Cacnb1	0.0203883635944898	0.0113531569144785	0.0197053277262864	0.0375626234050559
Cacnb3	0.00362461556850902	0.00268295027667863	0.0083605855167091	0.0318833919836208
Cacnb4	1.26982826480215	1.15891707617653	1.45965143575977	1.67644523066488
Cacng2	0.00381173881394425	0.00379872522746754	0.000310901028810344	0.000806720021162765
Capn6	0.00150143466801437	0.000745986296541676	0.000621705428212378	0.00746605352679632
Caprin2	0.0927302190392626	0.0806850202535879	0.109736627838054	0.171432462932772
Car10	0.00916110326767551	0.0162845062509989	0.00465339658951163	0.00379742375673102
Card6	0.00611671775510694	0.00365002714507316	0.00866889846554805	0.00918110163265333
Caskin1	0.0136794961248962	0.00854542667044719	0.00619972917221718	0.0294235346168899
Casp3	0.0157770045335339	0.00869339864890854	0.00866889846554805	0.0252728069789656
Catsperd	0.00636558673244398	0.00253408617573634	0.00403419341421862	0.00963795146121422
Catspere1	0.0160850909193259	0.0100241620706868	0.0230534183973568	0.0417733367343342
Catspere2	0.162746968987356	0.1164548593876	0.196423863312139	0.340298783959146
Cbr3	0.0021263677228724	0.0067680529549186	0.00279463563750286	0.00115225804890073
Ccdc124	0.376184833166902	0.416102978294672	0.225878792160799	0.264217531336931
Ccdc152	0.240758861757821	0.312955513181037	0.337497160018836	0.12734977669179
Ccdc18	0.0224106443560555	0.015990778926564	0.0203149058570654	0.0495935242069915
Ccdc190	0.00512062202527607	0.00758307473377418	0.0154278445964762	0.00322298263622704
Ccdc191	0.359456175408859	0.272074561233395	0.362260350962433	0.512041793264736
Ccdc24	0.218264436214142	0.215952533947	0.211637301640614	0.129681698833261
Ccdc40	0.00518290708539304	0.00223629147579103	0.00279463563750286	0.00609189408844793
Ccdc62	0.139875870672191	0.080134134686309	0.120544674623348	0.216257415321612
Ccdc85a	0.00841639598403902	0.0142266008800099	0.0203149058570654	0.00425673918388128
Ccne2	0.0225942854320484	0.025056445770402	0.0236609596368806	0.0136265096022135
Ccr9	0.0226554916305784	0.0251292229413069	0.0236609596368806	0.0132852558611069
Cd34	0.0179316186295384	0.0114269381993077	0.0166518508005335	0.0249355051932682
Cdc42ep3	0.00181395001310797	0.00141689849076189	0.00186395793183908	0.0047158437372238
Cdh13	0.0709246581793646	0.0632547164908654	0.0990921435074306	0.14575499597703
Cdiptos	0.0221045009338606	0.0388616592569101	0.0279034446234161	0.0102087204023369
Cdk15	0.00262603312921287	0.00260852099627255	0.00589065388807404	0.0303187284651459
Cdkl3	0.136877484472999	0.0895946366694889	0.14289527669195	0.199115924830933
Cdkn1c	0.028148765229816	0.0301380996148472	0.0559318701841908	0.0942236156471989
Cdkn2d	0.273388792832017	0.358090219365194	0.247960389559948	0.221259921211726
Cdyl2	0.0685891245203905	0.0486477503940631	0.0550493764279959	0.0959010088478904
Cecr2	0.219622434044281	0.135925222960838	0.176554588721218	0.287318475592005
Cep112	0.0847094203860778	0.053186741908168	0.0917432379470874	0.154881488893786
Cfap47	0.0247342765252288	0.0246196714830341	0.024571579981864	0.0525514215472795
Chsy3	0.614074773376927	0.494375548545507	0.430445418451961	0.961798126547555
Clic1	0.00175145475686817	0.00342693855491064	0.0068175933054513	0.0139676469289299
Cmtm3	0.0263820034061846	0.0173852159631932	0.0175688732673784	0.0723720390289957
Cnbd2	0.112281388848264	0.0984932012446567	0.1114070265165	0.19675121185141
Cnmd	0.00872675808630248	0.0076571346947965	0.00341460658878367	0.0214433751224065
Cntfr	0.275672472971484	0.213845695121422	0.218658468145395	0.481526198250183
Cntn6	0.00206389198881765	0.00305501360561281	0.00372444798747966	0.0299831246758259
Col15a1	0.0260160764354521	0.0227977223781901	0.0145088557515188	0.00986629813241247
Col18a1	0.00168895559472722	0.00164043589873301	0.00465339658951163	0.0112352842556438
Col20a1	0.0219820173174987	0.0325970450558005	0.0227495093066256	0.0793186543853418
Col27a1	0.0163314917058026	0.010762710581464	0.0135890215891675	0.151815552847358
Colec11	0.00399882705082131	0.00342693855491064	0.00558148304686453	0.00963795146121422
Cpeb1	0.523016565828185	0.408146257261664	0.630271810365798	0.739189962535648
Cplx1	0.0116394631218243	0.0180450607098348	0.0120540819392426	0.0102087204023369
Cplx2	0.00543200853882117	0.00572979087542988	0.00372444798747966	0.00184297612093925
Cpxm2	0.0133088904499984	0.00943293028370807	0.00279463563750286	0.00391227239353217
Creld2	0.20631535923221	0.291442275845673	0.133688499109184	0.131098471889459
Crnde	0.112617077328482	0.0627642309405669	0.053576820635736	0.172500308861575
Crybb1	0.00125135205348273	0.00350130694827066	0.00186395793183908	0.000576294986767591
Cryl1	0.0133088904499984	0.00802735224907545	0.0117468110818374	0.0200883020728323
Csdc2	0.0284530641018551	0.0415856611016928	0.0297161571070117	0.0172593218292082
Csmd2	0.860413822701341	0.557008805534562	0.356398997389219	1.00492012636985
Cst6	0.00256358860529788	0.00201288723903117	0.00248450596577076	0.00769489662581566
Cul7	0.0489907406029933	0.0298484139980456	0.033933084553472	0.0699024015485124
Cycs	0.388316697624368	0.506995255288374	0.339934857207038	0.33519950685439
Cyp26b1	0.00187644136393479	0.00387306597781673	0.0043438429284359	0.0380066922485738
Cyp2j8	0.0320974462009003	0.0219220063167516	0.0236609596368806	0.0451953088370707
Cyp4f14	0.00959525987521513	0.0100980414720248	0.0187902632405266	0.0225712016807448
Cyp51	1.06287061783499	1.15872970092369	0.678746898257443	0.48550726149205
D030051J21Rik	0.00984326476243055	0.00928506770284007	0.0138957269967669	0.0204272425200043
D3Ertd751e	0.218163770382564	0.162346461082679	0.243582905632149	0.308543767447631
D630003M21Rik	0.00418588029223713	0.00223629147579103	0.00805217748167867	0.00986629813241247
D630045J12Rik	0.0474992906138398	0.025056445770402	0.0203149058570654	0.0830392477528462
D730003I15Rik	0.0974552071360475	0.0636049160794915	0.0788949402949504	0.155671174652247
D930007P13Rik	0.00300061840916383	0.00245964581424518	0.00217428008378695	0.00700821016131874
Dact1	0.00785750134630862	0.00476472417819338	0.00619972917221718	0.0283034141988544
Dap	0.0295477739685006	0.0148885324265392	0.0181797547281242	0.0421050075706562
Daxx	0.0734874606584031	0.141576580345662	0.0999366293343243	0.0767593661763322
Dbi	2.4423932966162	2.79289827750501	2.37257199578693	2.17540425244839
Dbx2	0.00543200853882117	0.0103196469326874	0.00866889846554805	0.00345279868385671
Dclre1c	0.0737782730620545	0.0986284453739727	0.135862437997306	0.19057665956931
Ddx21	0.279940367276097	0.456714126631053	0.254490894384509	0.279241387096954
Ddx25	0.00909906550520758	0.0169450774550649	0.0123612584102694	0.0092953336580114
Dennd2c	0.00356223337141962	0.00171493726521938	0.00310466915864005	0.0105510254593855
Dgat2	0.14719765354304	0.115723941587999	0.13694763775219	0.299953900576581
Dgka	0.0213693741010302	0.0302105079087971	0.0360348985404642	0.104765286597803
Dgkz	0.174856974328995	0.126500497411472	0.140196188907252	0.330819737248731
Dhcr24	0.337496414799352	0.474237004140125	0.444499172035563	0.161966310947954
Dhcr7	0.326039330204574	0.287027522273439	0.163965769833516	0.162554453280645
Dhdh	0.0347615771426471	0.022943600526461	0.0306212826136105	0.0541909251996791
Diaph3	0.067828900101796	0.0556603161167505	0.0757289759523564	0.131300704282974
Disc1	0.0320974462009003	0.0215568981675901	0.0342336142965026	0.0419944628476032
Disp1	0.00530746556854885	0.00535872158768328	0.00589065388807404	0.0151039315995653
Dlg4	0.0272353126320807	0.0243283826044505	0.0272984761868878	0.0720502580759196
Dlgap5	0.00218883955395365	0.000895116799623633	0.00124302457892367	0.00402710784163862
Dmd	0.744379424443785	0.621576526313375	0.87994921102426	1.17671520923198
Dmrtc1a	0.00512062202527607	0.00327818517415999	0.00928523933905549	0.0262840302378771
Dnajb11	0.579222653211485	0.738731095348013	0.532972183706886	0.429102345666139
Dnm1	0.00978126930661561	0.00802735224907545	0.00866889846554805	0.0585498390509229
Dnm3os	0.134964728959557	0.0978167060973273	0.0612105402968781	0.0449748894607641
Dnph1	0.0433113577413082	0.0714174162520216	0.0458843787423137	0.0321067156265668
Dntt	0.017254954304045	0.008323427640204	0.00589065388807404	0.0203142751349803
Doc2g	0.0114537990431219	0.00935900172619192	0.0102090389664845	0.0211047789670347
Dock6	0.0170703299944501	0.0119432548263348	0.0221414139025314	0.0411096648625191
Dok6	0.011144282288846	0.00921112821284424	0.0187902632405266	0.042436568437907
Dpp6	0.0369360537673222	0.024401212779096	0.0446956563785763	0.0842057238948093
Drd2	0.00455988184103604	0.0123855998560889	0.00866889846554805	0.000806720021162765
Dtx1	0.0482751222106527	0.0325248093671291	0.0354348309008378	0.0902284938376059
E2f3	0.148439741166802	0.0961912481036952	0.104428548736711	0.197319253153819
Ebf4	0.0110823674402556	0.00669392711681608	0.00589065388807404	0.0194100763417974
Ebp	0.529268386242319	0.578830554242362	0.476285513873545	0.333961894421782
Eef1g	0.857788677024628	1.00645537517783	0.625957852708164	0.65288206649229
Efcab2	0.228080852125257	0.19793192119716	0.318909504446357	0.383174148485824
Efcab5	0.0897013362627329	0.0772369960338517	0.0968366885322037	0.169877194086366
Efr3b	0.365599392806657	0.516256414814771	0.72211482891413	0.266869674661737
Egf	0.043251402879507	0.0319467359330191	0.0664614923021279	0.0729081106288332
Ehbp1	0.815763082810408	0.836533468975324	1.207706425254	1.22727317344657
Eif3j2	0.107232492144286	0.152079543449498	0.068496106014948	0.037007259898434
Elfn2	0.00928516724775315	0.00913718325539597	0.0068175933054513	0.0307660250539997
Emb	0.00524518826632291	0.00335256463048135	0.00279463563750286	0.0112352842556438
Enho	0.236665995346999	0.25162826455906	0.235753080654287	0.113551678821122
Eno2	0.0213693741010302	0.0241098602496983	0.0248749359168329	0.102062192380085
Epb41l4a	0.212510248985611	0.119108247834182	0.190015980037223	0.234296464197764
Ephb6	0.00231377150914601	0.00156592898137948	0.000621705428212378	0.00860974568950669
Erbin	2.48176690342647	2.21126656991933	2.1814966632426	2.91866015084598
Erich6	0.024123317657938	0.0414424774241239	0.0375334941725159	0.0215562150351317
Etnk2	0.00106374904129133	0.000895116799623633	0.00403419341421862	0.00826677536308101
Etv1	1.52532418696622	1.78116425394954	1.5262964005836	1.05130850503821
Etv4	0.00349984728254893	0.00528449120418231	0.00124302457892367	0.000921912630532333
Etv5	0.118807074354413	0.0974782868290961	0.0696568864996118	0.0493740722599149
Evl	0.0186078253900229	0.0256385148891193	0.0526922451932593	0.0509092255078712
Exoc3l2	0.00168895559472722	0.000373062710213553	0.000621705428212378	0.0047158437372238
Extl1	0.00293819727239786	0.00461616967929852	0.00217428008378695	0.00149767672135069
Fam110b	0.00959525987521513	0.00854542667044719	0.0172632925389303	0.017599222326611
Fam114a1	0.0176241006962826	0.00943293028370807	0.0197053277262864	0.0188445366392696
Fam180a	0.000813556931539477	0.00178943308166563	0.00310466915864005	0.00700821016131874
Fam186a	0.0196519736348921	0.0143001704705414	0.0282057916519565	0.0373405150124713
Fam227b	0.0140499645021094	0.01297508901936	0.010824431610862	0.00735161233585361
Fam83b	0.00512062202527607	0.00298061201349156	0.007126382272479	0.0183918744830077
Far1os	0.226933903713502	0.226658651504053	0.13504776464317	0.117454879389558
Fau	1.74579267081413	1.95853331695028	1.49847487360149	1.55276491358039
Faxc	0.0229002789695882	0.0413708778965185	0.0488500171692652	0.0814464024755444
Fbxl22	0.00605449083210459	0.00787928167428234	0.00465339658951163	0.00437153508407177
Fbxo2	0.558594387140118	0.571525144742102	0.549441779872947	0.262002026109917
Fdft1	0.774090049992642	0.815823975078393	0.586444162755254	0.371951052030557
Fdps	0.997864404362838	1.14533550847046	0.735914445485004	0.365572265310804
Fgf13	0.012010687897768	0.0129014218749188	0.0043438429284359	0.00299311376104077
Fhl3	0.0019389288098367	0.00402173090092757	0.00217428008378695	0.0092953336580114
Fkbp9	0.0971712003701198	0.0874772323555266	0.103587849356501	0.151914600872112
Fmn1	0.918140383674209	0.727690002455696	1.22548433113338	1.35957206935141
Fndc5	0.0165778317938875	0.0253475226803174	0.0129753284250096	0.00425673918388128
Foxp2	0.00922313718169823	0.00898927693490734	0.019400399259684	0.0211047789670347
Foxp4	0.057065492386671	0.037640620401479	0.0576945247417006	0.0996648876773089
Fth1	4.36386606165289	4.66757397576247	4.22752737680643	3.78839591743972
G630018N14Rik	0.00306303564977469	0.00617489234313694	0.00279463563750286	0.0260594023120313
Galnt18	0.00256358860529788	0.00736086193575221	0.0123612584102694	0.0221202236850551
Galntl6	0.0343382126033426	0.052691291989668	0.0734201444321905	0.0202012949868844
Garem2	0.0809634964288586	0.167093433847998	0.236735168025707	0.0729081106288332
Gas5	0.83975796477648	1.07135001348901	0.700280092689528	0.752859136369671
Gas7	1.00746601117502	0.736946978176349	0.948486602477632	1.24688124295071
Gdap1	0.0830398954221802	0.145713606262392	0.17785685614993	0.0471768999595514
Gdap1l1	0.028209632412499	0.0435166368356933	0.0387307558073495	0.0209918880999271
Gfpt2	0.00318785844447634	0.00424468685394493	0.00465339658951163	0.0139676469289299
Ggnbp1	0.0461849720521031	0.0350499589123775	0.0438031863650088	0.0798510159938817
Gjb6	0.00903702389381689	0.0173118729967662	0.0157339866315652	0.00689371655923926
Glb1	0.0726727357178551	0.0545302984839158	0.0768813957708666	0.0971572098691336
Glipr2	0.00231377150914601	0.00721269263314682	0.00372444798747966	0.00241821029305479
Glod5	0.00381173881394425	0.00446759310868563	0.00403419341421862	0.00918110163265333
Gm10076	0.155431379635033	0.254293839903336	0.103587849356501	0.128465722273375
Gm10401	0.0233896739583898	0.0271648363097658	0.0138957269967669	0.0114632665139121
Gm10558	0.00692531558206983	0.00572979087542988	0.00279463563750286	0.0016127897696857
Gm10602	0.00574329812098778	0.00824941701020106	0.0126683405528866	0.0173726348324214
Gm10649	0.00200141235130169	0.00156592898137948	0.00341460658878367	0.00528942818242661
Gm11077	0.0065521978285267	0.00691628814924021	0.00866889846554805	0.0137402349754619
Gm11100	0.0043105630177224	0.00602654719895876	0.00496285445677084	0.00195804942995608
Gm11423	0.0148521754631041	0.00891531557024917	0.0142023383650009	0.0202012949868844
Gm12146	0.060371531401979	0.0442308678600439	0.0315255896088264	0.0185050592331812
Gm12153	0.000813556931539477	0.000895116799623633	0.00248450596577076	0.0047158437372238
Gm12264	0.0190993250818709	0.0195098254113124	0.0111319859757496	0.0112352842556438
Gm12610	0.00100120688199227	0.00149141651233158	0.00217428008378695	0.00700821016131874
Gm13184	0.00349984728254893	0.00357566981138403	0.00496285445677084	0.0106651011116298
Gm13684	0.105431168027723	0.0988312772785526	0.0996552132908465	0.0525514215472795
Gm13748	0.0286964365466456	0.0256385148891193	0.019400399259684	0.0129438856261295
Gm13889	0.0404895862525921	0.0262202454004611	0.0166518508005335	0.108289112969988
Gm13905	0.241054083383945	0.219494045069938	0.192840508677791	0.092753584971218
Gm14061	0.00443523019936365	0.00372437895016031	0.000621705428212378	0.0112352842556438
Gm14280	0.00175145475686817	0.00104422506611475	0.00124302457892367	0.0172593218292082
Gm14286	0.00586778682658396	0.00305501360561281	0.00650870895834438	0.00838111187557035
Gm14320	0.00474683017457625	0.00327818517415999	0.00619972917221718	0.00792368736765239
Gm14634	0.0747664031149107	0.0442308678600439	0.0840540856537931	0.128871212104304
Gm15420	0.00971927000712583	0.00587818004523372	0.0083605855167091	0.0146495726567093
Gm15518	0.00524518826632291	0.0062490566636864	0.00341460658878367	0.00299311376104077
Gm15535	0.00698748834159888	0.00342693855491064	0.00186395793183908	0.00895259842761571
Gm15558	0.0165778317938875	0.0167983215591806	0.00928523933905549	0.00792368736765239
Gm15559	0.0178701226078043	0.0252019948160806	0.0169576184023561	0.0138539474167205
Gm15577	0.0125672667998187	0.0116482493973492	0.00897711638681007	0.0067792098468738
Gm15584	0.0105249612300862	0.0113531569144785	0.00527221658948348	0.0057480589769172
Gm15657	0.00996724414494205	0.0146679372578229	0.0138957269967669	0.0057480589769172
Gm15706	0.00816803692983123	0.00439329654443514	0.007126382272479	0.0135127712940335
Gm15713	0.0162082989017327	0.01157448443994	0.007126382272479	0.00460108735771902
Gm15813	0.0620204612125745	0.0673792775869676	0.0345340537485413	0.0343372132968816
Gm15860	0.020511042550961	0.0109841688130657	0.0200101632398623	0.0283034141988544
Gm15886	0.0754633192804985	0.0917075670538722	0.0494420909120552	0.0435409780431147
Gm15892	0.00798172715183902	0.00721269263314682	0.0160400349723916	0.0216690422164477
Gm15956	0.0193449843679878	0.019656183946105	0.0166518508005335	0.0111212736325805
Gm16000	0.0226554916305784	0.0225788652472073	0.0138957269967669	0.00700821016131874
Gm16054	0.0128763434977758	0.0127540713034926	0.00589065388807404	0.00563342099636896
Gm16055	0.0120725452979849	0.00943293028370807	0.007126382272479	0.00448631780767617
Gm16069	0.0144202956833293	0.0187777112525034	0.0145088557515188	0.00998045191766191
Gm16214	0.0146671069676463	0.0155500261095158	0.0102090389664845	0.00528942818242661
Gm16235	0.0133088904499984	0.013490607134646	0.00774367430178797	0.0067792098468738
Gm16271	0.000187802662147642	7.46236769363167e-05	0.00341460658878367	0.00253321743081203
Gm16741	0.0164546693352749	0.0180450607098348	0.0145088557515188	0.00815242577625869
Gm16759	0.442688432987675	0.369449514480371	0.503340153948979	0.64945536995073
Gm16876	0.0128145357999844	0.0138586717181756	0.0117468110818374	0.00609189408844793
Gm16982	0.0108346697042871	0.0152560829372255	0.0157339866315652	0.00769489662581566
Gm16998	0.00362461556850902	0.0029062048853615	0.00465339658951163	0.0183918744830077
Gm17029	0.00990525637504721	0.0110579773263296	0.00650870895834438	0.0041419301040791
Gm17130	0.0254669347895137	0.022068012259482	0.0169576184023561	0.0102087204023369
Gm17203	0.0152838688032514	0.0120169925874299	0.0172632925389303	0.0244855924265748
Gm17638	0.0129999474339645	0.0157704268009204	0.0120540819392426	0.00609189408844793
Gm19466	0.0300339272836644	0.0300656860775566	0.0221414139025314	0.0174859349972528
Gm20463	0.00922313718169823	0.012680387874908	0.00805217748167867	0.00643561101802868
Gm20470	0.040669937420249	0.0458003827754615	0.0285080472944007	0.0262840302378771
Gm20539	0.00474683017457625	0.00327818517415999	0.00650870895834438	0.0116911968081169
Gm21119	0.00829222416721258	0.0095807710044655	0.0151216088097394	0.0206531390123689
Gm22146	0.00399882705082131	0.0230165316212096	0.0239645918977967	0.00356768690492462
Gm26512	0.00829222416721258	0.0131224070296966	0.00928523933905549	0.00746605352679632
Gm26531	0.061549615790047	0.0438023904634619	0.0360348985404642	0.0240354771472674
Gm26532	0.00218883955395365	0.00164043589873301	0.00248450596577076	0.0126023988177189
Gm26555	0.00300061840916383	0.00141689849076189	0.00465339658951163	0.010779163752104
Gm26660	0.0348220431621382	0.0218489953504574	0.039627762279028	0.0608306854187667
Gm26743	0.0190379008297325	0.0137850696383949	0.0132822220845003	0.00632105183448125
Gm26747	0.0290613841933305	0.0217759790531728	0.0206195556344972	0.0460765008163149
Gm26802	0.00168895559472722	0.000596833550235585	0.00124302457892367	0.00906685655684885
Gm26834	0.000688437399213194	0.00104422506611475	0.00403419341421862	0.0133990200479792
Gm26843	0.0577748500165576	0.0346896134190244	0.0488500171692652	0.085159102435764
Gm26854	0.0299731710428178	0.038359059101923	0.0414193649633259	0.0111212736325805
Gm26877	0.00125135205348273	0.0023107484650978	0.0015535394501592	0.000461062555624696
Gm26901	0.0446893283880441	0.0315852702679525	0.0203149058570654	0.0665640800722574
Gm26935	0.0292438080837772	0.0246196714830341	0.0260874402451107	0.0588759929250567
Gm26982	0.00754686930048163	0.012680387874908	0.0178743606447705	0.00689371655923926
Gm27153	0.0913026437748223	0.0782726522048112	0.0582813865027492	0.0278550144878457
Gm28221	0.0249174914213322	0.0298484139980456	0.0145088557515188	0.010094592673312
Gm28370	0.0120725452979849	0.0123855998560889	0.0102090389664845	0.005174737610296
Gm28376	0.396604371535295	0.255277148459982	0.201774933884106	0.132614218893331
Gm28379	0.132335557777077	0.127617773915968	0.0786075391844604	0.0665640800722574
Gm28501	0.0571837536074556	0.0822671279018441	0.0594540778141664	0.0288636312415828
Gm28941	0.0166394073352891	0.0167983215591806	0.0212285768961955	0.03478271643739
Gm29069	0.00125135205348273	0.000969673712028582	0.00124302457892367	0.00460108735771902
Gm29114	0.0257110349732242	0.0480789251011882	0.0679152101020414	0.0148767779333932
Gm29361	0.0479171208816872	0.0483633781929018	0.0438031863650088	0.0254976116457332
Gm29514	0.0346406341341409	0.0236726722319399	0.0206195556344972	0.071942974744562
Gm29666	0.0108346697042871	0.00802735224907545	0.0120540819392426	0.0169193057601733
Gm30085	0.000187802662147642	0.000447658554069094	0.000621705428212378	0.00700821016131874
Gm31305	0.0147904897701342	0.0227977223781901	0.0175688732673784	0.00826677536308101
Gm31371	0.0132471094819828	0.0133433433608249	0.0227495093066256	0.0295354776827635
Gm31812	0.00928516724775315	0.00617489234313694	0.00496285445677084	0.0178257584905385
Gm32036	0.132993498907352	0.188952811169749	0.214150523950963	0.0600709811784862
Gm33255	0.0834431394799602	0.127617773915968	0.100780402606606	0.0269576114277701
Gm33373	0.00742258945927931	0.00394740120202957	0.00496285445677084	0.00803806311211297
Gm34093	0.00181395001310797	0.00156592898137948	0.00248450596577076	0.00849543531671611
Gm34408	0.0297301091594939	0.02883385297596	0.0479612487520288	0.00883832724197067
Gm34655	0.00356223337141962	0.00126784578674665	0.00279463563750286	0.00632105183448125
Gm34907	0.00156394555078872	0.000969673712028582	0.00279463563750286	0.00803806311211297
Gm35330	0.000750999122238505	0.000373062710213553	0.000621705428212378	0.00276319203400549
Gm35733	0.000750999122238505	0.000223854326806967	0.000621705428212378	0.00700821016131874
Gm36356	0.0167009790853769	0.017458553550824	0.0300179566463842	0.00826677536308101
Gm36584	0.00798172715183902	0.00387306597781673	0.00589065388807404	0.0124885439626114
Gm36816	0.00903702389381689	0.0152560829372255	0.0102090389664845	0.0041419301040791
Gm37165	0.0197747429586386	0.0209724477148856	0.0111319859757496	0.0111212736325805
Gm37459	1.05383252336655	0.909368089826806	0.619284440840746	0.555045760010102
Gm3764	0.016269897200826	0.0244740376498936	0.00558148304686453	0.00207310949863005
Gm37756	0.0130617436733061	0.0148150061104155	0.00743507591831391	0.00643561101802868
Gm37850	0.0212468004050509	0.0209724477148856	0.0111319859757496	0.00918110163265333
Gm37864	0.00947123436288427	0.00654565895465466	0.0178743606447705	0.0148767779333932
Gm38250	0.0216144764292618	0.0131224070296966	0.0209241126287077	0.0296474082187898
Gm38551	6.26048063354194e-05	0.000149241785594997	0.0015535394501592	0.00356768690492462
Gm39214	0.116302232370568	0.103417800023965	0.0673339765529323	0.0489350238354259
Gm39473	0.00349984728254893	0.00372437895016031	0.00619972917221718	0.00138255042047621
Gm41333	0.0205723763858608	0.028326186203379	0.0166518508005335	0.050470850720552
Gm41836	0.00574329812098778	0.00521025531012245	0.0043438429284359	0.0221202236850551
Gm42477	0.00872675808630248	0.0140058596279319	0.0203149058570654	0.005174737610296
Gm42825	0.000312984845418912	0.000223854326806967	0	0.00632105183448125
Gm42917	0.0316729520195108	0.0483633781929018	0.0476648169908354	0.0296474082187898
Gm42948	0.00162645252619685	0.00141689849076189	0.00217428008378695	0.0047158437372238
Gm43330	0.0346406341341409	0.0262929379256647	0.0452901941930419	0.0507996498258926
Gm43331	0.0167009790853769	0.0153295768309376	0.0218372274767378	0.0295354776827635
Gm43376	0.209011297673733	0.177208127630955	0.104148394133243	0.0959010088478904
Gm43581	0.0256500155131537	0.0148885324265392	0.0129753284250096	0.0360068276838915
Gm44129	0.0206950327712959	0.0188509467926951	0.0151216088097394	0.00975213131458861
Gm44686	0.127772907823741	0.11119364262726	0.0840540856537931	0.0585498390509229
Gm44866	0.385041940410184	0.46513906472095	0.339713493760938	0.0669954579673252
Gm45479	0.00847847611094081	0.0106888802709782	0.00928523933905549	0.00563342099636896
Gm4566	0.00275091048030445	0.000969673712028582	0.00248450596577076	0.00448631780767617
Gm45708	0.00947123436288427	0.00610072252183307	0.00527221658948348	0.0141950071779594
Gm45732	0.00791961617808017	0.0102457839022189	0.00743507591831391	0.00551876987244738
Gm46123	0.00118882162654743	0.000596833550235585	0.000932413258253129	0.004830586949213
Gm46210	0.00262603312921287	0.00156592898137948	0.00279463563750286	0.00735161233585361
Gm47018	0.0136177380497226	0.0156969653010384	0.0218372274767378	0.033891511594862
Gm47167	0.124461594346701	0.122745199170467	0.0771692933338359	0.0737652279014612
Gm47271	0.320965411164652	0.284110935526162	0.266711129579069	0.136443860174073
Gm47661	0.0325217602634364	0.0183381853432652	0.0148152792139172	0.00975213131458861
Gm47849	0.00325026399953956	0.00268295027667863	0.00372444798747966	0.00838111187557035
Gm47962	0.00760900342950804	0.00476472417819338	0.0123612584102694	0.0118051424760972
Gm48342	0.0332487371871904	0.0286163130594643	0.0132822220845003	0.00540410560213833
Gm48383	0.0318549001624269	0.0267289821435613	0.0342336142965026	0.0145359506570956
Gm48653	0.0130617436733061	0.0154030653236942	0.0248749359168329	0.0306542196623477
Gm48683	0.00667658588222208	0.00995027721077957	0.0043438429284359	0.00368256192820544
Gm48689	0.00916110326767551	0.00906323282968661	0.0083605855167091	0.005174737610296
Gm48696	0.0136794961248962	0.0132697033406337	0.00866889846554805	0.00723715804662571
Gm4924	0.206162541381545	0.167156574837188	0.320039075961666	0.320413480395851
Gm49969	0.0572428789736178	0.0599568318351167	0.0550493764279959	0.0296474082187898
Gm50106	0.00499604026554771	0.0062490566636864	0.0068175933054513	0.001727889568532
Gm50399	0.0138030008342414	0.00943293028370807	0.0135890215891675	0.0225712016807448
Gm553	0.000187802662147642	0.000149241785594997	0.000310901028810344	0.00345279868385671
Gm5547	0.00368699387430265	0.00134237491584284	0.000621705428212378	0.00746605352679632
Gm5820	0.0645474640828219	0.0550248383291292	0.0742865810640887	0.026733134773101
Gm6277	0.00218883955395365	0.0041703737260642	0.00465339658951163	0.00103709197209299
Gm7580	0.0367550278695345	0.0479366682069908	0.0426119859895586	0.0141950071779594
Gm7697	0.00374936828928594	0.00424468685394493	0.00496285445677084	0.0128300696465276
Gm8098	0.0157770045335339	0.0129014218749188	0.024571579981864	0.0280792394761375
Gm9495	0.00462220183559448	0.00327818517415999	0.00372444798747966	0.00963795146121422
Gm9968	0.0646648438301201	0.043588082898169	0.0315255896088264	0.0229093017587702
Gng11	1.65530171313622	1.41530551400424	1.12934259366945	1.00816467813696
Got1	0.199261454810759	0.276612270129272	0.239920307244604	0.140359090507967
Gpnmb	0.00143891987738527	0.000447658554069094	0.00341460658878367	0.00655015707927284
Gpr153	0.00748473131056533	0.0111317803922989	0.00589065388807404	0.00620647952562365
Gpr162	0.00412353309934163	0.00409605507533206	0.00217428008378695	0.00115225804890073
Gpr22	0.0106488561303249	0.0103935045078117	0.00527221658948348	0.00643561101802868
Gpr27	0.00156394555078872	0.00134237491584284	0.000310901028810344	0.00586268381710523
Gpx7	0.00362461556850902	0.00387306597781673	0.00341460658878367	0.0148767779333932
Gramd1b	0.41318357212546	0.347127942104077	0.509710846186767	0.620991283201822
Grasp	0.0415712056827806	0.0235997889762919	0.0309228091512705	0.077506502079079
Grik5	0.154948914925807	0.101464355047254	0.1114070265165	0.226145573478332
Grk5	0.192260757114626	0.115325033861195	0.15121644991981	0.222737351997953
Grwd1	0.0492887638557215	0.0784796547911368	0.0360348985404642	0.0400025653360652
Gse1	0.435504817168393	0.34543884814895	0.60001718688769	0.591054976551172
Gsta4	0.016269897200826	0.0195830073563112	0.0279034446234161	0.00803806311211297
Gstm6	0.0674778322712718	0.0940198526412598	0.1114070265165	0.0446441692732078
Gucy2f	0.000500728742893468	0.000671412704206344	0.000310901028810344	0.00792368736765239
Hao1	0.000938660810926858	0.000671412704206344	0.0068175933054513	0.00437153508407177
Hapln2	1.43074203042476	1.83748425073467	1.79663008947016	0.872627676189504
Hba-a1	0.015098880190777	0.010762710581464	0.0263903367528096	0.0560457856691007
Hepacam2	0.00393646819422682	0.00171493726521938	0.00372444798747966	0.0066646900212196
Hfm1	0.00325026399953956	0.00156592898137948	0.0015535394501592	0.00735161233585361
Higd1a	0.500195934492446	0.654768283939261	0.651242580015715	0.399621487031885
Hint1	1.31896444609988	1.61422803128066	1.30824156529489	1.07963201956823
Hip1r	0.21836509191313	0.140345098802049	0.249172964291257	0.297645045415975
Hist2h3c2	0.0136177380497226	0.0205338856027185	0.0390298473757742	0.00883832724197067
Hk1os	0.00536973899255393	0.00394740120202957	0.00866889846554805	0.0120329948686074
Hk2	0.012319936642572	0.0246924804469214	0.0172632925389303	0.00597729551994513
Hmgcr	0.552019248848687	0.616714847812426	0.333049701470033	0.26474852300952
Hmgcs1	1.61336367945763	1.61991574971351	1.06895639617033	0.754486951746931
Hook1	0.0117013434885929	0.0192902474372452	0.0260874402451107	0.0396701963314005
Hoxa9	0.00150143466801437	0.00119331110264537	0.000932413258253129	0.00860974568950669
Hoxc4	0.00449755796245381	0.00521025531012245	0.00959326738079057	0.0178257584905385
Hoxc5	0.0021263677228724	0.00178943308166563	0.00372444798747966	0.00643561101802868
Hoxc6	0.00860262480411404	0.00558137968301237	0.00928523933905549	0.0253852156294916
Hpcal1	0.182814833818903	0.14674519404612	0.231321712633019	0.300380881963477
Hps1	0.0535111367243436	0.0410844285101589	0.0582813865027492	0.101437362398119
Hsd17b10	0.472324088078507	0.529088408074547	0.383250817036731	0.281593076660443
Hspa12a	0.0618439201580382	0.0505651504628559	0.0817644175519003	0.112315917273937
Hspa5	1.59696610005293	1.87877662083805	1.26302527587436	1.37113914848244
Hspg2	0.00387410544876282	0.00201288723903117	0.0068175933054513	0.0104369367924021
Hsph1	0.685394205274653	0.885766790993971	0.547465302074738	0.543329174096857
Htr2b	0.0304591176439952	0.0348337671986049	0.0257844519633187	0.0179390073309207
Id4	0.0160234812350773	0.0103935045078117	0.019400399259684	0.0283034141988544
Idi1	0.814682547193539	0.995374343624203	0.589552996261459	0.265190800791497
[truncated: 728 more rows]

## Sheet: DGE_RNA_MOL2
Pseudobulk aggregation of the expression of differentially expressed genes in MOL2 between timepoints, normalized by the total number of counts multiplied by 10,000 and natural log transformed
	Ctrl	Early	Peak	Late
1110020A21Rik	0.0421706070832596	0.0170247325549999	0.023787351565352	0.0379770393801741
1110038B12Rik	0.0926046185085072	0.189428330355342	0.179813009013527	0.111083571080187
1190005I06Rik	0.482632797536833	0.264505619094112	0.351173838641087	0.539807607473967
1700019A02Rik	0.0158156639799857	0.0309262292578087	0.0124928471146956	0.0214445478360569
2310002F09Rik	0.0111274912051397	0.0585576149579719	0.679317035234241	1.02810017576053
3300002I08Rik	0.147914649441157	0.286758292907935	0.265012739109073	0.245909810569896
4930408O17Rik	0.0272171047954	0.0070942432453686	0.00759405898716433	0.0123102792668097
4930471L23Rik	0.028260728910912	0.0137255145116264	0.00945047789124138	0.0384153545339236
4930532G15Rik	0.00945864868901539	0.00125558794912177	0.00546820883500981	0.00517791459676127
4930599N23Rik	0.0445190953640828	0.192542175799134	0.267472159043644	0.14332161953972
4933406I18Rik	0.000919273120764033	0.0280799111686847	0.0128889963643505	0.00481542558595087
4933412E12Rik	0.00107240318220319	0.0430337980756471	0.220320315695883	0.0363096874552716
8030451A03Rik	0.00443534557515552	0.0145513400371919	0.00373762174153754	0.0097881683516695
8430426J06Rik	0.00214365754770589	0.0203131015422689	0.01328498874192	0.00987835336032354
9030025P20Rik	0.0516772212579731	0.5417812173142	0.530456546494207	0.146315912751414
9330111N05Rik	0.833104684450613	0.345071939900001	0.255735664355926	0.62640387589255
9330175E14Rik	0.00137859297658287	0.0207233883910443	0.0604562297509242	0.0333190487507479
9530077C05Rik	0.087561811571335	0.347737566221461	0.371671316690231	0.109125636246942
9930111J21Rik2	0.000153270883718479	0.00875618815618156	0.252520195317189	0.117744404435756
A330008L17Rik	0.0307907194124208	0.0100008367435087	0.00945047789124138	0.0363975121632533
A930017K11Rik	0.0195805039117104	0.00667832508674155	0.0117000775016271	0.0237596074337894
A930037H05Rik	0.083762947549825	0.195990670074257	0.269925545068684	0.134443817011505
AC156546.1	0.0192798377715903	0.0398194195912029	0.0332754544049261	0.021533687763642
AI506816	0.14486925609078	0.273466197468588	0.403617686221598	0.151417036739234
AU020206	0.000612942633479883	0.0390142079606378	0.268495134808488	0.0844061108402175
Abcb1b	0.0130961757140229	0.0337644688089185	0.107786175091725	0.101666779324505
Abcc4	0.0367185100538032	0.159531465047787	0.323496100060687	0.242914048912469
Abhd14b	0.146591704803566	0.0792750827701496	0.119128356677038	0.157348614506777
Abra	0.00290813724247059	0.0112439381062813	0.00307121303922091	0.0024560387542602
Acsl5	0.00183770195452845	0.0353827104962159	0.174323354878625	0.0304077916466992
Ada	0.0240796815843692	0.107501633690791	0.128933626753683	0.0576854168873632
Adam9	0.456953254784328	0.767220930824535	1.10572811539999	0.634983534766544
Adamts1	0.0907865369849609	0.211363399566672	0.11066373569904	0.176692147702719
Adamts2	0.491016895312009	0.235809425099863	0.172861843540811	0.491242543305132
Adamtsl3	0.0304934054810315	0.179678335713651	0.258217978248158	0.43461115374648
Adar	0.155684597659476	0.295210848542521	0.413837359828339	0.293882915421401
Add3	1.05704887485459	1.71571443292448	1.43985923609553	1.10207825770349
Adra1a	0.00153165272387637	0.014963997195271	0.0163157319323369	0.00689794526366028
Afap1l2	0.00153165272387637	0.0223628545022831	0.127404197327328	0.085159165932313
Ahr	0.00474050755719733	0.0276726321420624	0.0666059220038891	0.0331428499859634
Ajap1	0.000459742193262117	0.010829742661745	0.0694795218451438	0.135000994702573
Ak5	0.113346809718912	0.178628032835813	0.216127168530873	0.362926394269949
Akap12	0.012490839328582	0.0325490666967036	0.0226113271927364	0.0200172272878805
Aldh1l1	0.0371616810356502	0.127976460883674	0.246058072293609	0.158592897053655
Aldh1l2	0.331141493566542	0.842483533548169	0.739249850458361	0.859489002445494
Aldoc	0.961082798083224	1.34313503131114	1.33469378509788	0.485037703084389
Alox5	0.00336654469048739	0.0104153755882521	0.0114356812393638	0.00662655808434763
Alpk1	0.00702625892247961	0.0248170249421569	0.0708509386342938	0.020374248461975
Amotl1	0.00367203295444615	0.145871126908816	0.191917672979443	0.0557061243502479
Angpt1	0.0206321240713979	0.0557889754319729	0.190481669355418	0.0527730187635889
Ankrd13a	0.651048238265273	1.06154942709613	1.09370520935152	0.941517585757996
Ano4	1.95867390209203	1.44352224551555	1.07077653491593	1.69764917727555
Ano6	0.00443534557515552	0.014963997195271	0.040750290589619	0.0193921333583289
Anxa2	0.0306420734961728	0.127976460883674	0.219031988251212	0.271226163153529
Apba2	0.118670039580523	0.260963306438359	0.526830613392022	0.399319341161239
Apobec3	0.000612942633479883	0.0223628545022831	0.0584399484842539	0.00897613706448954
Apoe	1.44273868710833	0.620233174123033	1.17328465482635	2.52458480123011
Apol9a	0	0.00501292041160023	0.0803985525546285	0.0115002942607062
Apol9b	0	0.00501292041160023	0.0565459854474733	0.00662655808434763
Aprt	0.0248275804274451	0.0597418322293653	0.111381833904331	0.0548443389330717
Arhgap27	0.00153165272387637	0.0124854960864383	0.0190749330341616	0.00563084115954639
Arhgap28	0.00367203295444615	0.0293007539361259	0.0678563280016519	0.0244708565635317
Arid5a	0.0719937625319507	0.149484083592503	0.178471387764	0.0862459119903498
Arntl2	0.0333143252118305	0.157029067876657	0.148606231663652	0.0939031610737009
Arpc1b	0.331361614941476	0.813017530026621	1.09491402560951	0.801422475358737
Arrb1	0.00672179377435369	0.102978136400806	0.269619200783411	0.12733250115574
Arrdc2	0.282768948651437	0.584231003569134	0.446198129284177	0.289801504051067
Arrdc4	0.0097622818257633	0.0305201080637147	0.052366596979133	0.0400792021806561
Asns	0.0137011458889936	0.0656419739246193	0.0800282691966155	0.026335482229689
Astn2	0.215761984219876	0.503036116742417	0.625699461742197	0.577214001678711
Atf3	0.00214365754770589	0.0640720034880976	0.0462561343719709	0.0523409531794058
Atp1b2	0.0452518683015794	0.10411093048424	0.139225629556162	0.0909969830272943
Atp8a2	0.0221325227686674	0.102600253032881	0.158812855238229	0.0488776915021609
Atrnl1	0.00428272965559044	0.0170247325549999	0.0367620716325451	0.0109599395403565
Azin1	0.437350350208776	0.751543001525557	0.629269771117598	0.503482857578178
B230206H07Rik	0.196428422510623	0.100329949193277	0.170383640172067	0.308439588524455
B230312C02Rik	0.00596022509867385	0.0219532398914686	0.00413725389878139	0.00707882914128072
B2m	0.415536171237254	1.14968508421025	3.19695773640208	2.35655519701421
B4galt6	0.185537960533626	0.345071939900001	0.436305493369896	0.250812018898208
BC024139	0.0149099893780216	0.00417917682815104	0.00560120695122104	0.0087053133704482
Baiap2	0.00945864868901539	0.0313321855844323	0.0972850510312969	0.0434858196209081
Bambi	0.0349438595061573	0.141881739467224	0.091321716399364	0.0602612292794268
Baz1a	0.0140034937859669	0.0565807977858837	0.140853271264954	0.0741416866919983
Bcat1	0.665255507025118	1.11623543204977	1.18725285218662	0.784608996904051
Bcl3	0.00367203295444615	0.126132339609796	0.233960179378561	0.108472138484044
Bcl6	0.143010987369606	0.296768326381711	0.390038223020101	0.282481386763932
Bdkrb2	0.0699948745042125	0.0268575761221571	0.0226113271927364	0.080212113263133
Becn1	0.301424932669041	0.684985374825309	0.646161941108179	0.365014960667722
Bex2	0.00885110569623134	0.0248170249421569	0.0171048522665866	0.00789240193719648
Bmp1	0.110194134005438	0.268355702802253	0.482839641486427	0.264677359213288
Brinp3	0.111703175561669	0.229171099957237	0.358582736355529	0.15602486568848
Brip1	0.00107240318220319	0.00958612598504419	0.025353235764454	0.00852472348501718
Bst2	0.0129448759672098	0.379755955692505	0.931416068730308	0.254137497409973
Btbd16	0.00656952643109844	0.0386113588776013	0.0513507759246399	0.0162607891058308
C030029H02Rik	0.858888977319872	0.385184045408312	0.139225629556162	0.672218169444751
C1ql2	0.000612942633479883	0.014963997195271	0.0135488965704762	0.0041807534678947
C1qtnf1	0.00107240318220319	0.00875618815618156	0.0194684838693153	0.0049060601579867
C1ra	0.000153270883718479	0.0100008367435087	0.0769372308446813	0.0132094938042071
C230035I16Rik	0.00137859297658287	0.0070942432453686	0.0430587523735312	0.012759987608853
C4b	0.528125037656076	1.29876683807305	1.96600759905724	2.03243168700293
C630043F03Rik	0.214031002169255	0.0946315367097689	0.0328873010222806	0.10830869729349
Cacna1a	0.154109152510711	0.481275643594006	0.721013520622447	0.505297808243302
Cacna1h	0.00489305363388297	0.0207233883910443	0.118653376458456	0.0580292421256212
Cacna2d1	0.0754111592854037	0.133121981353795	0.154582296876325	0.107163860383169
Cacnb3	0.00535055229178419	0.0178478391107953	0.0916878422676406	0.0606041701796506
Cacng5	0.00153165272387637	0.112379107943115	0.216558044993572	0.0905811244164206
Cadps2	0.0612384979994733	0.345961271747911	0.77450761291134	0.569874732924596
Casp7	0.00672179377435369	0.0557889754319729	0.149412785208057	0.0447929731934806
Casz1	0.0130961757140229	0.0438357808766441	0.145951537563295	0.0700741662354177
Cav1	0.112114337439094	0.0309262292578087	0.0806453319764761	0.0927417031629634
Cav2	0.175428328413325	0.0605305320324406	0.159497208391836	0.176310448419616
Ccdc3	0.0097622818257633	0.0542034472902945	0.340765360853315	0.152903232904641
Ccdc91	0.370320308746929	0.153084033797937	0.256770710753974	0.323051169994641
Ccl12	0.000306518279073199	0.012899006434555	0.00240435994017945	0.00218344325250965
Ccl2	0.000153270883718479	0.0104153755882521	0.0142083615954803	0.00181986695428254
Ccrl2	0.00199069145222025	0.0116579620639779	0.0152626018900229	0.00499668651614135
Ccz1	0.464110030151333	1.14316417761471	1.03930046124285	0.75756645364755
Cd151	0.0300472687765149	0.0573719936531877	0.127639646468546	0.0682043423496777
Cd274	0.00763491126269086	0.37141375047113	1.03546157641217	0.28761792087556
Cd34	0.054293921557556	0.0190812300161967	0.0115678881086683	0.0460984203459013
Cd44	0.0930237067897748	0.195646355299944	0.511071481033514	0.222636722303955
Cd59a	0.924360930969109	1.29762343448091	0.788342814773954	0.665265374604763
Cd63	0.750130872704352	1.68961966490617	2.12346339004341	1.756017057891
Cdc14a	0.338161455187002	0.763909875381967	0.891589016483622	0.62664725219595
Cdh13	0.0097622818257633	0.036998337707639	0.216234905052909	0.0221574448699023
Cdh22	0.00367203295444615	0.0781137859636409	0.209641643355148	0.0414781930056357
Cdh24	0.00290813724247059	0.0162009479366463	0.0210411402135372	0.0049060601579867
Cdh8	0.583424181645894	0.32560627982575	0.176903884642393	0.531491913582463
Cdk6	0.00153165272387637	0.0458379284876695	0.0278275486261172	0.0087053133704482
Cdkn1a	0.298244881215357	0.786478888150535	0.857966132279802	0.38603568075976
Cdkn2d	0.291968755153517	0.478943625014477	0.267676837932095	0.224311969856978
Cebpa	0.000919273120764033	0.0116579620639779	0.0288675357668138	0.00218344325250965
Cebpb	0.00702625892247961	0.191851047590568	0.414809443132708	0.233800451038785
Cebpd	0.0869999267115921	0.512111460303637	0.459716555226161	0.235097204825226
Cela1	0.105929087730249	0.289583757303289	0.33532895980455	0.434198255200768
Cemip	0	0.0231815807148979	0.0164472952394414	0.00309180609696944
Cenpv	0.121796147986307	0.0569764739683962	0.0499523349454609	0.10740929293776
Cep112	0.142346482216211	0.0660340817097202	0.161888762974935	0.248470482541574
Cers1	0.0200313336895715	0.107877669787467	0.0775562033490738	0.0823113107520234
Cgref1	0.00214365754770589	0.0120718146767755	0.00931799077061739	0.00454347257166359
Chac1	0	0.0070942432453686	0.00918548609483041	0.00181986695428254
Chl1	0.00474050755719733	0.0726764975934755	0.090833339962293	0.0233148197007759
Chst2	0.55029473947741	1.00016231883215	1.21441869920466	0.528489844844622
Cic	0.201704222534749	0.395670721068121	0.51179321880724	0.317232132047694
Clca3a1	0.00321376555522446	0.0862146845114932	0.123629452147801	0.0138384632170813
Clcf1	0.000919273120764033	0.0137255145116264	0.0265260418899944	0.00372716949636501
Cldn12	0.0573381096557334	0.136415889377927	0.203877564728123	0.11814912125712
Clec2d	0.000153270883718479	0.0120718146767755	0.071349169706355	0.0109599395403565
Cmpk2	0.00214365754770589	0.165227824309592	0.400396899648008	0.0551029525479647
Cmtm3	0.00535055229178419	0.0141385125228816	0.0502067424454433	0.0434858196209081
Cnksr2	0.0484697054159757	0.0207233883910443	0.029906442457814	0.0404291334148667
Cntn1	0.070566393195199	0.283924822637877	0.41259879466611	0.119847145522734
Cobl	0.439525576037134	0.221146499610856	0.216773413624466	0.314642371784238
Col16a1	0.0739886629757502	0.576260628267564	0.681145944264639	0.437202619546932
Col1a2	0.053131788887987	0.169125333111817	0.452597521220398	0.351136297983329
Col23a1	0.00869916225730948	0.157386936802538	0.172861843540811	0.19424466408051
Col5a3	0.0100658227974131	0.0442365312148707	0.165748718097852	0.0379770393801741
Col7a1	0.00122550979841676	0.0157888010047194	0.0219573822170792	0.00762128454309659
Cox6b2	0.0245284880091882	0.00792556095834617	0.0188124797386793	0.0252704076209194
Creg2	0.108407780378064	0.0502285936258441	0.0192061338557719	0.0613753574693851
Crip1	0.076831634973293	0.0211335069735566	0.136779188904322	0.162316482143018
Crip2	0.207326147821033	0.378896189069607	0.445170415480334	0.325619272610107
Crnde	0.0715657656154409	0.036998337707639	0.0512237257071718	0.0929077083353686
Csrnp1	0.0254254970288394	0.0585576149579719	0.0730910262076171	0.0427007065381716
Cth	0.00611258523982493	0.0207233883910443	0.0207792025161469	0.00897613706448954
Cthrc1	0.00214365754770589	0.012899006434555	0.0127569640508344	0.00499668651614135
Ctnna2	2.46596583424459	3.20544056214712	3.49378897468842	3.06087561185278
Cxcl10	0.000766119606917842	0.00958612598504419	0.0168418813392024	0.00236518184323854
Cyp2j6	0.521231521544365	0.246339928431592	0.159725222073872	0.199629941369875
Cyp46a1	0.11662599556804	0.0557889754319729	0.0332754544049261	0.0393789721422416
Dagla	0.00168468904746881	0.0120718146767755	0.0344390113924695	0.0280195338138414
Dbp	0.113757296490282	0.0679923177178882	0.0916878422676406	0.102078054271598
Dclk3	0.140483515209894	0.0691654213116997	0.0254836155014894	0.0415655649819373
Ddah1	0.0318306226085564	0.0577673569640051	0.0526203910914186	0.0682894102356884
Ddx58	0.0106726284691069	0.276329414843555	0.407273213897679	0.113037679894497
Ddx60	0.00489305363388297	0.300186262896138	0.933363755188607	0.450814775720334
Defb42	0.0692800165054686	0.0293007539361259	0.010245032216892	0.0641979668281548
Depdc1b	0.21105661552402	0.0923430483889155	0.0642258344869484	0.16710568290101
Deptor	0.311915253537421	0.117605303076138	0.0370198566280117	0.149144365020098
Dgkg	0.0149099893780216	0.00167376717612451	0.00732857473270392	0.00526851632220264
Dhx58	0.00168468904746881	0.0133123458625384	0.0434429784384291	0.00735009362442107
Dna2	0.0321275392913447	0.0648572968072233	0.0402365745860792	0.0526866205799153
Dnah8	0.0771154881411353	0.0280799111686847	0.0169733754471081	0.0280195338138414
Dock2	0.120438171041282	0.361252003215616	0.162684678515058	0.0908306603349754
Dock7	0.325733328485564	0.594221052081313	0.78718701979559	0.915754109050753
Dok7	0.0714230592599538	0.150205111151417	0.172411717675208	0.162858348390341
Dscam	0.243057796999969	0.0490330500866519	0.126226119358184	0.150477247210784
Dse	0.0860158678779127	0.0361908503833027	0.0383077857499721	0.0457504677035466
Dtnb	0.26092840021107	0.523589149963915	0.76615096840238	0.520728599827606
Dtx3l	0.00214365754770589	0.174415755081128	0.475218918301978	0.112386734479923
Dtx4	0.0386375007980416	0.012899006434555	0.0420334272027859	0.0517357475662813
Dusp5	0.000153270883718479	0.00459613551091848	0.00931799077061739	0.00354567828531374
Dzip1	0.0796665473888099	0.0414279003614992	0.0831097824652936	0.174017188069751
E230001N04Rik	0.00199069145222025	0.0190812300161967	0.0343097941201012	0.0054496951507854
Ecm1	0.00611258523982493	0.0357868620760167	0.105983485748902	0.0234037930756767
Eef1akmt4	0.0158156639799857	0.0280799111686847	0.0412637428245228	0.0188560273865048
Efnb1	0.0315336177400672	0.0100008367435087	0.0118322494228597	0.0182302069490388
Eif1a	0.111566084026369	0.220138881665886	0.217957112700259	0.155011403504041
Eif2ak2	0.0197308030885161	0.319235516027585	0.556090205531318	0.194619580176805
Eif4ebp1	0.00122550979841676	0.0227723013976646	0.0224805724046531	0.00508730466190345
Elf4	0.00214365754770589	0.0178478391107953	0.110544002514719	0.0709229317747933
Emp1	0.00336654469048739	0.0182591384638778	0.184383348151308	0.0572554690318662
Emp3	0.00183770195452845	0.0613186102783264	0.0752020668171766	0.0480099987413707
Endod1	1.334924022301	2.28174934079579	2.39442384383827	2.03568396191461
Eno2	0.00793909856751618	0.0284870243866296	0.111740689725118	0.0806323054393302
Enpp1	0.615573995112328	0.327720880317569	0.158356359475455	0.282824644425549
Epha10	0.0860158678779127	0.0333594988829297	0.0649780532385344	0.128534586447004
Epha4	0.336630043965136	0.21034587057631	0.318645678942868	0.381257312269237
Eps8	0.0140034937859669	0.0569764739683962	0.126933132670706	0.0585447584299562
Eps8l2	0.039521948324558	0.0190812300161967	0.025353235764454	0.0397291484517109
Erap1	0.0858752089604202	0.219466571874644	0.612014828831172	0.258366782086197
Ermard	0.226940917432045	1.34575517186264	1.28592721387245	0.62999981040624
Etv5	0.102752902079698	0.0426325653549684	0.180483145261105	0.0679490952637539
Etv6	0.250721682430732	0.503289324942287	0.660288923664159	0.381070679149208
Eva1c	0.0118851362890413	0.0466376664721654	0.07072634207002	0.0370120692448948
F830016B08Rik	0.000153270883718479	0.0927248269870131	0.914411028361176	0.338621472977689
Fads2	0.00854719572807053	0.0268575761221571	0.0468943858094229	0.0103291564438848
Fam107a	0.021232553720855	0.306370920266574	0.472721290477273	0.0808003328850596
Fam124a	0.00580784174037275	0.0186702687193499	0.0345682119698916	0.0266015737287363
Fam129b	0.0528410445741043	0.0923430483889155	0.118296993181818	0.089748888019654
Fam13a	0.103996959035267	0.265790628050114	0.744091116542502	0.430711319442674
Fam180a	0.00183770195452845	0.00958612598504419	0.0494433256935991	0.0201957538079425
Fam234a	0.613584257584976	0.349805929777586	0.317088562160757	0.392822555236246
Fap	0.000612942633479883	0.0100008367435087	0.0575565454424029	0.00644559237227767
Faxc	0.0558896519777824	0.134587280123655	0.248877357032546	0.207061705437875
Fbln2	0.0393745947155338	0.114622251149148	0.297814465342233	0.200375608107784
Fbxo31	0.179279475532345	0.318322084650821	0.41259879466611	0.228234165195381
Fchsd2	0.0278135947916666	0.0672094834170742	0.0527472639973533	0.0523409531794058
Fga	0.000306518279073199	0.0569764739683962	0.00466984846504569	0.000364238440553857
Fgfr4	0.0291543978092468	0.248628768346	0.23744674777616	0.187547530588228
Fgfrl1	0.421688239186204	0.719429905835495	0.666214089765837	0.521269525830577
Fgl2	0.000306518279073199	0.0850614233767187	0.304346294228141	0.0499179299756041
Fhod3	0.00367203295444615	0.0361908503833027	0.033146086683661	0.0115903250003225
Fjx1	0.0216826394877937	0.0842918430616629	0.280891899396691	0.0520816241937737
Fkbp5	0.104825471349143	0.749169967181894	1.02850466314927	0.427865493152119
Flnc	0.0112790661509645	0.0892835610483347	0.178918794871154	0.138892570165475
Flot1	0.157126578559424	0.424023127634188	0.474470284741549	0.289665169702209
Fndc3b	0.133533377632615	0.331636171536244	0.507454957844441	0.291504116979625
Fndc4	0.0121880336683324	0.0386113588776013	0.0301660005732622	0.0179618782504278
Fosl1	0.000612942633479883	0.00875618815618156	0.00799215326207374	0.00309180609696944
Fosl2	0.00489305363388297	0.0256337451439472	0.0961924073096116	0.0676086644381113
Gabra3	0.0398165904193415	0.00792556095834617	0.0174991790399051	0.0232258384089092
Gadd45a	0.101091748306863	0.191505304281889	0.325622854715252	0.248044158970623
Gadd45b	0.0567589783237797	0.350691063345373	0.462078348564995	0.267469327929496
Gadd45g	0.00550300534400967	0.288642822587173	0.300689767488388	0.113037679894497
Galnt17	0.207824348306312	0.492854852731458	0.76453348967799	0.54504923202916
Galnt18	0.0138523312642616	0.0640720034880976	0.250960603557882	0.240410706968602
Gap43	0.00382474209739653	0.0288939719308479	0.0201240579406371	0.0221574448699023
Garnl3	0.417456450663142	0.797858122893406	1.50300954457924	1.09256373232698
Gbp2	0.000153270883718479	0.513365435820618	1.8884777591819	0.443476711232211
Gbp3	0.00397742792382517	0.561321950728738	1.37353475367704	0.337322334293983
Gbp4	0.000766119606917842	0.0100008367435087	0.827216453665574	0.204466865874085
Gbp5	0.000919273120764033	0.0446371210165967	0.319617647119201	0.0627448903442914
Gbp6	0.00778701648134303	0.0946315367097689	0.686410747222445	0.141979159107265
Gbp7	0.0127935533253192	0.848955094882255	1.69430325957909	0.763101723283284
Gbp8	0.00122550979841676	0.0112439381062813	0.276641484642241	0.0712622363803915
Gbp9	0.000153270883718479	0.0248170249421569	0.387499783239974	0.108472138484044
Gdf11	0.00428272965559044	0.0190812300161967	0.0500795467858491	0.0131196087281487
Gdf15	0.00107240318220319	0.0133123458625384	0.033146086683661	0.00236518184323854
Gdnf	0	0.014963997195271	0.0198618798831371	0.00780203763943284
Gfra1	0.0415826222191594	0.165582771668946	0.212240903044417	0.148516511079671
Ggta1	0.0167205190776134	0.267073987877019	0.56258775376999	0.266353475679354
Gjb2	0.0207822652854971	0.00417917682815104	0.042546221199616	0.0209095413416029
Gldn	0.000153270883718479	0.0256337451439472	0.0977702875089829	0.0245597271459291
Gli2	0.0156647751630896	0.146233010548937	0.372224495460779	0.123234568597552
Gm10687	0.0600844125333457	0.0199026462890986	0.03003622993684	0.0767598612443401
Gm11639	0.0112790661509645	0.00292725663662312	0.00613302260162139	0.0132094938042071
Gm12185	0.000306518279073199	0.0462378774275208	0.38895110918323	0.0421769551612373
Gm12216	0.00260241549249338	0.102600253032881	0.398872359211204	0.0972141983337475
Gm12522	0.0306420734961728	0.012899006434555	0.0172363118021834	0.0557922620589661
Gm12530	0.0264709916074155	0.0804350325305546	0.0679812826510864	0.0438345610089393
Gm15477	0.0147589638327302	0.00250960137389276	0.00493603941456805	0.00798275806999161
Gm15912	0.215267723588858	0.102600253032881	0.233324949745252	0.282893281821038
Gm16175	0.000919273120764033	0.0244084145680326	0.0319810234543236	0.0177829524428426
Gm16183	0.00611258523982493	0.0297073705370852	0.049697862705832	0.0167982878330296
Gm16316	0.028558707290733	0.0581625640244486	0.0198618798831371	0.0169773898935098
Gm20559	0.00733063139979343	0.11574193868523	0.374250203577708	0.126931484730941
Gm2115	0.124912514285299	0.0333594988829297	0.0549016442372398	0.05303216853576
Gm2164	0.0937217971946921	0.205242636958904	0.477461462132604	0.24548239369159
Gm2245	0.000612942633479883	0.0104153755882521	0.0218265418889988	0.00363642800822183
Gm26543	0.0180762683935992	0.051820431528328	0.0897336201394679	0.0551891422259526
Gm26673	0.0793834175267467	0.281083300995321	0.369363105643972	0.235025207046528
Gm26797	0.00778701648134303	0.0223628545022831	0.033146086683661	0.00933712126800475
Gm27008	0.0361273097338417	0.0153764841376583	0.0257443239900115	0.0424388651391421
Gm28529	0.0358315784529994	0.014963997195271	0.0335341396502575	0.0332309532491062
Gm29502	0.0677055277930288	0.0272651871716469	0.00320453031246421	0.0279309701887808
Gm31152	0.0569037926029061	0.0288939719308479	0.0262655371488654	0.0911632780609754
Gm32568	0.00413009044085118	0.0170247325549999	0.00613302260162139	0.00472478279854478
Gm3417	0.00839520610149551	0.250912381433347	0.130460720597323	0.0212662441395647
Gm3435	0.0174739400511583	0.191851047590568	0.187049008333203	0.060689887031535
Gm3448	0.0636865161583717	0.436551141443916	0.28522487857933	0.113119018285887
Gm34590	0.0846083875871608	0.0434348698731951	0.0335341396502575	0.108962301838669
Gm35455	0.00244951956068899	0.0256337451439472	0.0429306442049678	0.0168878428729632
Gm36043	0.00137859297658287	0.0231815807148979	0.101281228016887	0.00888587064906087
Gm36608	0.0228818787622611	0.010829742661745	0.0115678881086683	0.0245597271459291
Gm38505	0.0456912744635344	0.012899006434555	0.00440358663903462	0.0115002942607062
Gm39129	0.0508034640273084	0.0100008367435087	0.018943714996637	0.0460984203459013
Gm4131	0.00183770195452845	0.0199026462890986	0.0163157319323369	0.00635509723404007
Gm41333	0.00824319337056223	0.0227723013976646	0.0167103699383224	0.0368365200427162
Gm41492	0.0573381096557334	0.036594675549941	0.0581876272378512	0.096966250460641
Gm42372	0.131788269357911	0.0865988095209412	0.0374064095644521	0.0551891422259526
Gm42413	0.5464858509893	0.276647044646914	0.132337024995728	0.24298548096675
Gm43091	0.00290813724247059	0.0357868620760167	0.0992245858128998	0.0235817160802152
Gm43154	0.0420236432758895	0.112753314741341	0.0940035317197461	0.0402541831042449
Gm43666	0.0168712486906184	0.00376204421831753	0.0178933503809085	0.0341995771852465
Gm44148	0.0352398533909536	0.0722869862258811	0.189596948769589	0.095642822504212
Gm44421	0.0288565969058885	0.0683835051770883	0.0500795467858491	0.0319968006456812
Gm45767	0.161440087225128	0.078888133660892	0.0942469768542277	0.109615479463968
Gm47043	0.00199069145222025	0.0100008367435087	0.0138127347700657	0.00445280512920836
Gm47316	0.000153270883718479	0.0141385125228816	0.0236567504677384	0.0061740823857486
Gm4841	0	0.0100008367435087	0.155956331854553	0.0218010598807509
Gm49012	0.0519683040945767	0.0219532398914686	0.0449784081008315	0.0934055585702989
Gm49289	0.0117336531873884	0.0333594988829297	0.0127569640508344	0.0317321410943297
Gm49375	0.0564692868368121	0.0178478391107953	0.00931799077061739	0.025447998851022
Gm4951	0.000153270883718479	0.258379174764318	1.84822082657655	0.795808239726794
Gm49970	0.0564692868368121	0.0297073705370852	0.0146038319622071	0.0319968006456812
Gm50237	0.000153270883718479	0.0157888010047194	0.321461787985384	0.0504376437075035
Gm6034	0.00229660024814377	0.0112439381062813	0.042289857070911	0.0129398143344194
Gm816	0.497375684155985	0.173359907403506	0.0832328457038937	0.298893822100131
Gm9750	0.0167205190776134	0.00292725663662312	0.00573418738128555	0.010419292678916
Gmip	0.0143057502963191	0.0288939719308479	0.0512237257071718	0.0393789721422416
Gpd1	0.432388987184349	1.089970495808	1.51383952556443	0.587439810888381
Gpr151	0.000153270883718479	0.0345739169908013	0.01328498874192	0.00209256156980109
Gpr158	0.409447808366113	0.140427098120139	0.298013027682053	0.574653943577512
Gpr176	0.219584243479809	0.0746217818899633	0.162457338708647	0.152746895176873
Gpx3	0.00214365754770589	0.0211335069735566	0.177127964148532	0.0514762615654184
Gria3	0.00260241549249338	0.0170247325549999	0.0366331542106144	0.0112301533984339
Grik2	1.83212872134744	2.63478101803797	3.18307702912564	2.75109152701264
Gsap	0.00214365754770589	0.0100008367435087	0.038436487477269	0.00996853023637524
Gsta3	0.0518227732674271	0.0284870243866296	0.042289857070911	0.107327488779063
Gtsf2	0.00930679754123611	0.0321436041703202	0.0260049645273327	0.0268675944419329
H2-D1	0.370426146812839	0.62875566142271	2.70443592780953	2.06613919067252
H2-K1	0.167681252534347	0.50202264231157	1.97465849403628	1.18809374863952
H2-M3	0.000459742193262117	0.0141385125228816	0.160181093526476	0.0507839695325318
H2-Q4	0.000612942633479883	0.0711175409802756	0.578011753520188	0.220885640596666
H2-Q7	0.000612942633479883	0.0120718146767755	0.527541070365314	0.21326198601622
H2-T22	0.0297497336918095	0.243389415406875	0.557239903745324	0.189583988799065
H2-T23	0.0165697667417672	0.673519840954751	2.04117511021735	0.579512463742207
H2-T24	0.00869916225730948	0.0349783955118732	0.141201707229463	0.0226027475723912
Hap1	0.00306096307493068	0.0203131015422689	0.0595746068882029	0.011410255414826
Hddc2	0.00626492217089964	0.019492022493232	0.0243095854561386	0.011410255414826
Hebp1	0.307867528273584	0.161315065475991	0.194783508675007	0.338361780226772
Helz2	0.00275528805070549	0.0124854960864383	0.0172363118021834	0.00572140186020905
Herc6	0.0652673404831767	0.704428553480376	1.24641873729566	0.615537830743126
Hes3	0.00824319337056223	0.0530126492546585	0.0560403222300114	0.045663460622316
Hfe	0.0120365964470396	0.0746217818899633	0.12999109390023	0.0469677726343078
Hif3a	0.0287076631905885	0.19977032870941	0.432407664602943	0.105853868448288
Hmgcll1	0.0115821471351287	0.0466376664721654	0.172073990261135	0.09911309233987
Hmox1	0.0194301821416663	0.0628929060118188	0.103333649123521	0.0686296094327416
Hoxd9	0.0684215118110057	0.0268575761221571	0.0468943858094229	0.05734147339265
Hpgd	0.00107240318220319	0.00584596944572232	0.0105097434281038	0.00653607932188626
Hspb1	0.00214365754770589	0.224163275967105	0.402008589617511	0.085326434523758
Htra3	0.090366509885358	0.194957369889101	0.101402075347761	0.102489160141144
Iars	0.765219646050071	1.20603388362733	1.07667210379157	1.14001373948237
Idnk	0.0899463062888547	0.233822550530076	0.47263792868626	0.169491709485246
Ido1	0.000306518279073199	0.00584596944572232	0.0140765033774203	0.00363642800822183
Ido2	0.000306518279073199	0.0104153755882521	0.04523408399519	0.00852472348501718
Ier3	0.00275528805070549	0.0162009479366463	0.0401081043395795	0.0102390120835803
Ier5l	0.00428272965559044	0.042231171581972	0.140853271264954	0.0690546957405887
Ifi35	0.0334625744684393	0.253840813478995	0.493509995911008	0.168183948323661
Ifi44	0	0.0178478391107953	0.257494606323943	0.0249151305167651
Ifi47	0.000306518279073199	0.0672094834170742	0.70230593170787	0.163322571591495
Ifih1	0.0100658227974131	0.239441807080825	0.498234130608351	0.143794999149279
Ifit1	0.00474050755719733	0.602967156460472	0.892520732538669	0.180881252037346
Ifit1bl2	0.000306518279073199	0.00542953167499542	0.0570513930988706	0.00852472348501718
Ifit2	0.1428781216596	0.376024949910821	0.965193957293779	0.300446164966295
Ifit3	0.00824319337056223	0.774003482992113	1.37991454293278	0.22968293506453
Ifit3b	0.00214365754770589	0.310984440405016	0.581830866185551	0.0767598612443401
Ifitm3	0.00580784174037275	0.0911968372854131	0.12280182383547	0.0211770803678231
Igtp	0.00413009044085118	0.901655622019382	1.75586056067424	0.601113300790563
Iigp1	0.000459742193262117	0.779396596039371	2.87179777263087	1.15696705871225
Il11	0.029600932945198	0.00750998848799739	0.0123607624828609	0.0153643153841076
Il12rb1	0.0448122689769693	0.119093498687748	0.603640121556742	0.176768470079132
Il15ra	0.00137859297658287	0.0301138218681836	0.0898558709705743	0.0209095413416029
Il17ra	0.0587844723381861	0.194957369889101	0.164388081649896	0.104213961599391
Il34	0.00428272965559044	0.0178478391107953	0.0678563280016519	0.019749377734087
Il4ra	0.000306518279073199	0.0104153755882521	0.0184186705969946	0.00309180609696944
Il6ra	0.00260241549249338	0.0329543648898555	0.0754501318030404	0.0452283116264408
Inava	0.000459742193262117	0.00750998848799739	0.0131530087052927	0.00671702866114316
Inpp4a	0.0206321240713979	0.0942504854976678	0.122565232738247	0.0515627643806978
Insyn2b	0.0168712486906184	0.112379107943115	0.134092868761695	0.106918367576651
Irf1	0.00550300534400967	0.441410999459479	0.926768435737615	0.257451953758249
Irf2bpl	0.0431987494247702	0.131654532332303	0.366029893756944	0.128134051885025
Irf7	0.0071784567414621	0.205583663955451	0.622475248077374	0.120412513484826
Irf8	0.00168468904746881	0.0361908503833027	0.178583258308417	0.0261580485529115
Irf9	0.0371616810356502	0.296457024812404	0.417279581424391	0.223292588223702
Irgm1	0.00748278290452147	0.871982000206859	1.86048978791087	0.684006224702108
Irgm2	0.000919273120764033	0.319539807834576	0.972654442563623	0.337582297086712
Isg15	0.00183770195452845	0.251889478615516	0.51139231768842	0.0619747589045252
Itga3	0.0182267938088654	0.0394168948216394	0.0359883176875321	0.0553614992991474
Itga5	0.000459742193262117	0.00750998848799739	0.0101126503296386	0.00572140186020905
Itga7	0.000766119606917842	0.0357868620760167	0.0449784081008315	0.0205527112613518
Itga9	0.0071784567414621	0.0248170249421569	0.143405653450512	0.0428752293892142
Itgad	0.076831634973293	0.263862494867168	0.32918950050321	0.150633940145305
Itgb3	0.0806568711024175	0.0293007539361259	0.0362463021966063	0.0526866205799153
Itih5	0.143409478612668	0.306987287447624	0.238606241095808	0.3308012032125
Itprid1	0.00107240318220319	0.126132339609796	0.445513104116753	0.081304245889299
Jade2	0.216749773204371	0.536896987075294	0.757535824356528	0.353377544351116
Jph4	0.403834057304657	0.159174362896494	0.037921581153418	0.324961413226792
Jpt1	0.0344997043408907	0.0691654213116997	0.0706017299795077	0.0502644358065108
Junb	0.0439324901599471	0.229504064901236	0.301382569065519	0.317895094221067
Kcnc3	0.00793909856751618	0.0341692748006526	0.100676772204239	0.0310260396586272
Kcnip3	0.00641723589896841	0.0357868620760167	0.170383640172067	0.0285507509135615
Kcnj3	0.00137859297658287	0.00667832508674155	0.00253776614017697	0.00481542558595087
Kcnj6	0.000919273120764033	0.0297073705370852	0.156985620523461	0.0117703621666011
Kcnk10	0.00153165272387637	0.0166129250734579	0.0510966593458949	0.00888587064906087
Kcnmb4	0.00611258523982493	0.0227723013976646	0.0258746527503583	0.0128499050138426
Kcnn3	0.00306096307493068	0.0293007539361259	0.0776799518879935	0.0454894237458645
Kctd11	0.0261723903906423	0.0486342177348494	0.0312035598550412	0.0317321410943297
Kctd4	0.595918610847773	0.332837798972574	0.116989166791005	0.247688750437359
Kdm4d	0.0421706070832596	0.0908144747760171	0.0613370760393688	0.111735365059396
Kdm6b	0.0785335466474602	0.132755320930914	0.182936476488425	0.0670126314828685
Khk	0.0612384979994733	0.0280799111686847	0.0367620716325451	0.0439217273560483
Kif21b	0.123152283330518	0.0514227095472916	0.0224805724046531	0.041740286036288
Kit	0.00778701648134303	0.0972948373232111	0.109225990439407	0.0313791526988818
Klhdc8a	0.0636865161583717	0.0284870243866296	0.0810153869591505	0.128694755362766
Klhl29	0.132459825299233	0.264827026170766	0.434141908900992	0.321335430277588
Klhl32	0.0353878174851912	0.13091999950327	0.311129711371707	0.19701572041236
Klk6	2.27841281326586	3.00104590473786	3.16999009448463	3.10522723057373
Klk7	0.000612942633479883	0.0272651871716469	0.0769372308446813	0.0259805833878371
Klk8	0.00244951956068899	0.124284811268633	1.41375731702668	0.763059261010561
Klk9	0.00626492217089964	0.107877669787467	0.177351993454294	0.112386734479923
Layn	0.000153270883718479	0.0112439381062813	0.00918548609483041	0.00127425453474319
Lbh	0.449647123515796	0.924676744875864	1.5200593992221	1.31943379120842
Ldha	0.0486157250011995	0.139698983183285	0.148721493434499	0.0455764459701945
Lfng	0.00413009044085118	0.019492022493232	0.0198618798831371	0.00599303476514948
Lgals3	0.00260241549249338	0.0199026462890986	0.440188188038789	0.19274359249157
Lgals3bp	0.00565543515784473	0.0796618822077076	0.354181528322486	0.0636853573677642
Lgals9	0.00107240318220319	0.0357868620760167	0.117583845374953	0.0245597271459291
Lgalsl	0.0336108017504637	0.107501633690791	0.0461284351861287	0.027488034372523
Lgi4	0.0668456697461713	0.250586470097639	0.531321673051091	0.262298041473375
Lhfp	0.0173233012610597	0.105996073675428	0.105622557589357	0.0337594098842845
Lhfpl3	0.145267007664743	0.310984440405016	0.384863874209229	0.796424475907777
Lims2	0.149895790582592	0.0831363609723325	0.0711000851995992	0.0997727329022422
Lmntd1	0.0550195692458954	0.0116579620639779	0.0284776673249289	0.0421769551612373
Lpar3	0.0071784567414621	0.0402217823997675	0.187603460942736	0.0547581195301935
Lpo	0.0615268113745806	0.301426258154561	0.152288034740504	0.0925756704282654
Lrp8	0.00260241549249338	0.0157888010047194	0.137012441282644	0.0307611230273126
Lrrc75b	0.0420236432758895	0.085445991552935	0.0372775751875002	0.0563089325556084
Lrrc8a	0.147385681589486	0.383473092798129	0.357086626452395	0.26516651678708
Lrrtm1	0.0327211083091799	0.0792750827701496	0.0732153285067419	0.0292586016999346
Lrrtm2	0.104135092098624	0.377174435045117	0.269925545068684	0.180729228035869
Lrtm2	0.00885110569623134	0.0345739169908013	0.0733396153567255	0.0378893532902867
Ltbr	0.0272171047954	0.0808213836469235	0.130108521252612	0.0889992826143004
Lurap1	0.218599251766937	0.123914895643648	0.0984977010338626	0.185506916751148
Ly6a	0.000153270883718479	0.0357868620760167	0.405313372806729	0.0183196338508961
Ly6c1	0.000153270883718479	0.0124854960864383	0.140039781562713	0.00436212946542259
Ly6e	0.000459742193262117	0.0116579620639779	0.0782984649812534	0.0106896526470144
Ly6g6e	0.0816462150451778	0.264184108681736	0.0604562297509242	0.127011700882067
Lypd6b	0.0691369835626212	0.0133123458625384	0.00360437552438371	0.0334071364922557
Lyve1	0.000153270883718479	0.0264497988581464	0.00560120695122104	0.00798275806999161
Maff	0.00351930048785166	0.0170247325549999	0.0482971066926443	0.0101488595965376
Mafk	0.0448122689769693	0.113875095684543	0.14352151617579	0.0890825998577336
Maged2	0.175942672424411	0.103355877026829	0.0768133903552837	0.138892570165475
Magee2	0.0071784567414621	0.019492022493232	0.00732857473270392	0.00572140186020905
Mamstr	0.000459742193262117	0.00667832508674155	0.0178933503809085	0.0147363052549447
Man1a	0.0812223303458667	0.337928668008293	0.4826745896249	0.244056349927959
Map2k3	0.0616709368963988	0.130552530662697	0.11162108542623	0.0910801340008896
Map2k3os	0.0127935533253192	0.0454378195246604	0.0345682119698916	0.0348154860925757
Map3k14	0.00839520610149551	0.0182591384638778	0.0354721489154698	0.0208203457578027
Map3k6	0.000153270883718479	0.00958612598504419	0.0291273636440001	0.0107797563955949
Map3k8	0.00107240318220319	0.0070942432453686	0.010245032216892	0.00969797520894609
Map7d2	0.59270368988368	1.14209549020086	0.716189648584356	0.589866405431104
Marcksl1	0.701018118796513	1.22847380828988	1.12388698416703	1.17070435209867
Mcam	0.279644812623551	0.14006310692063	0.131282036994194	0.264327814393281
Mchr1	0.000766119606917842	0.0345739169908013	0.0152626018900229	0.00191077342218943
Mcub	0	0.0124854960864383	0.0618400686358001	0.0141079004812057
Mdga1	0.00565543515784473	0.0162009479366463	0.0615886039627781	0.0550167554406759
Meis3	0.00413009044085118	0.0124854960864383	0.0323695287027684	0.0174250047556876
Metrnl	0.0141546334610177	0.036998337707639	0.0222190115268623	0.0134791005665856
Mfsd13b	0.0655544947922835	0.0378051735222467	0.0315923672108865	0.0620603583593569
Mgat4a	0.0368662555377732	0.0664260358065664	0.1062240321705	0.0762536524734091
Midn	0.00504557644381231	0.0280799111686847	0.0832328457038937	0.035694698435494
Mitd1	0.136613436189966	0.319844007076229	0.374710020062937	0.194919411882017
Mlkl	0.0272171047954	0.130184926739135	0.359049812036398	0.0861623580564792
Mllt6	0.167032945585922	0.30390164541788	0.358676168946108	0.329884841888554
Mmd	0.0121880336683324	0.0402217823997675	0.0245706001640373	0.0181407720492956
Mmd2	0.459183148676179	0.711854607125006	0.440790810143203	0.503427807617958
Mov10	0.00244951956068899	0.0414279003614992	0.0894890736323205	0.0232258384089092
Moxd1	0.000153270883718479	0.00626223386821858	0.0138127347700657	0.00109231755419106
Mpp6	0.028260728910912	0.0534097395095953	0.0458729878827836	0.0368365200427162
Mpped2	0.0651237324011036	0.0268575761221571	0.127050919639799	0.10536217870778
Mrgpra1	0.0071784567414621	0.0486342177348494	0.0286076403615556	0.00526851632220264
Mrgpra2b	0.0108242723711805	0.0357868620760167	0.0399796175863548	0.00653607932188626
Mrgpra6	0.00748278290452147	0.0361908503833027	0.0374064095644521	0.00744049876917183
Mrgpra9	0.00519807599408168	0.0462378774275208	0.0310739238022437	0.00445280512920836
Ms4a4b	0.000459742193262117	0.00626223386821858	0.010245032216892	0.0010013366495099
Mt1	0.679186037761203	2.18935044321633	2.53212597776114	1.24988228575104
Mt2	0.0759795917136124	0.805934316695297	1.24407031555715	0.224311969856978
Mturn	0.0500747493561577	0.0272651871716469	0.0168418813392024	0.0512167082140939
Muc1	0.00107240318220319	0.00875618815618156	0.010377396581501	0.00942734696168365
Mvp	0.228283790016386	0.504554405117705	0.738738877413111	0.462467756029546
Myc	0.00474050755719733	0.0297073705370852	0.0340513094732638	0.0211770803678231
Mycn	0.0164189916762276	0.00209177160235687	0.00106931817837311	0.00481542558595087
Myd88	0.018377296569641	0.0426325653549684	0.0613370760393688	0.0343755898707239
Myo16	0.00244951956068899	0.0166129250734579	0.0386938412501156	0.0101488595965376
Myof	0.031385082219812	0.117605303076138	0.347401460513997	0.296459219926585
Myzap	0.0243789082472664	0.0668178363355882	0.120670486142262	0.243699521010206
Nat8f1	0.245698887804911	0.0950124427771495	0.0493160328874502	0.0919112636833968
Nat8f4	0.0228818787622611	0.00542953167499542	0.0110389557271502	0.0137486346607492
Nav2	0.260692214042177	0.759020673510785	1.28503968591647	0.866826915080558
Ncdn	0.256668490642131	0.460353389150007	0.408429498966604	0.309108403565813
Ncoa2	1.19587321245227	1.72799020230664	1.76949106382252	1.53682151377761
Ncs1	0.201954758168715	0.11834967772269	0.197202048125656	0.207949816965251
Ndst1	0.418869037553665	0.742016888148281	1.23489341828993	1.00209452753803
Ndst4	0.096926751102684	0.208647684726896	0.0254836155014894	0.0352551888908247
Nes	0.00153165272387637	0.014963997195271	0.0359883176875321	0.0216228197460086
Neto2	0.0684215118110057	0.123544843130454	0.0666059220038891	0.0358704481804018
Nfkbia	0.385446812195307	0.656288504561144	0.527304307453023	0.257733528546507
Nfkbiz	0.0189790812041533	0.0585576149579719	0.0872854597579727	0.0568253362416958
Ngfr	0.0237803653580758	0.00834096079995411	0.00799215326207374	0.0469677726343078
Nhs	0.00397742792382517	0.0244084145680326	0.0663556530729761	0.043049721787346
Nid1	0.371906704759455	0.263218956765266	0.260591094199432	0.286045520133176
Ninj1	0.0465695079779722	0.0808213836469235	0.0662304951156484	0.0524273812319865
Nlgn2	0.0622472313517814	0.304828338162509	0.20518555185893	0.162858348390341
Nlrc5	0.0279626617135097	0.531496636105638	0.983266674334593	0.582721461069375
Nmi	0.0999827774572293	0.222823609922277	0.357554401289278	0.196117840520175
Nmu	0.00214365754770589	0.0104153755882521	0.00666455557446142	0.0202850051175015
Noc4l	0.0609501014757902	0.125024232258814	0.113413649599156	0.0679490952637539
Noct	0.0176245561526296	0.0707274217892351	0.148606231663652	0.0643687782719188
Notch1	0.00611258523982493	0.0699467265311229	0.188046801795927	0.043049721787346
Nr1d2	0.311803037678518	0.182124760946896	0.343709639181475	0.430652113924115
Nrap	0.0987337134681724	0.234485280780186	0.111740689725118	0.120412513484826
Nrcam	0.0141546334610177	0.11536884878922	0.185717066460019	0.0800439869429769
Nrg2	0.0622472313517814	0.0280799111686847	0.038436487477269	0.0557061243502479
Nrtn	0.030344715360425	0.0773388381873338	0.20464076511938	0.17508803072492
Nrxn1	0.0659850717071192	0.236140187398835	0.250231960836561	0.122751352977682
Nsun7	0.070280674678907	0.173711980512166	0.527541070365314	0.27289134802888
Nucb2	0.0984559316916373	0.0357868620760167	0.041776931561517	0.0289932163686976
Nupr1	0.0109758932808678	0.0605305320324406	0.168577445144962	0.0517357475662813
Oaf	0.00428272965559044	0.0116579620639779	0.0206482079336991	0.0186772615080658
Oas1a	0.000306518279073199	0.0174363705209455	0.127168692736755	0.0289932163686976
Oas1c	0.000153270883718479	0.00542953167499542	0.0135488965704762	0.0071692588119539
Oas1g	0	0.00626223386821858	0.0368909724369164	0.0105094207901385
Oas2	0.000459742193262117	0.00667832508674155	0.0617143442035993	0.0105995407790167
Oasl1	0.000153270883718479	0.0178478391107953	0.0201240579406371	0.00336415412922346
Oasl2	0.00107240318220319	0.337629921474817	1.05702293968276	0.32080691758071
Odc1	0.122203181730302	0.355105017265219	0.400396899648008	0.19738959922707
Ogdhl	0.0699948745042125	0.15128567864953	0.394825555980196	0.215834132918334
Ogfr	0.164435506580836	0.321667261803237	0.377831177523162	0.188981026005624
Olfml1	0.873777689232111	0.520358787097856	0.469548646934404	0.796711922885953
Ophn1	0.00596022509867385	0.0248170249421569	0.041135404479294	0.00996853023637524
Osbpl10	0.00504557644381231	0.019492022493232	0.0430587523735312	0.0162607891058308
Osmr	0.000459742193262117	0.0329543648898555	0.0354721489154698	0.0119503669253329
P2ry12	0.106618229979993	0.245357391053467	0.180371487068156	0.158903725928436
Parp10	0.000306518279073199	0.0742330276433698	0.344752302841531	0.0918281817932022
Parp11	0.0622472313517814	0.174415755081128	0.566921404450806	0.217154379631816
Parp12	0.0991502415064478	0.458766431154444	0.858533044889281	0.383742431203679
Parp14	0.00183770195452845	0.314354212089439	0.847477165534392	0.181641025568397
Parp3	0.0188286689931898	0.226503381695169	0.56570683587201	0.159913253045014
Parp9	0.00611258523982493	0.276964573593616	0.659321030235788	0.1722554533494
Parvb	0.0252760513911753	0.126870396263461	0.231098462941695	0.134523432833994
Patl2	0.00153165272387637	0.00667832508674155	0.0322400437232659	0.0132094938042071
Pcdhb22	0.0374570192830779	0.0792750827701496	0.124456396057901	0.109288943981443
Pcdhb9	0.00260241549249338	0.012899006434555	0.0152626018900229	0.0210879086451945
Pde11a	0.0719937625319507	0.0313321855844323	0.0181560449841174	0.147338221390251
Pde3a	0.000612942633479883	0.00667832508674155	0.0653539505332862	0.00897613706448954
Pde3b	0.00824319337056223	0.0656419739246193	0.0304254913357768	0.0132993708016648
Pde4a	0.166384218062922	0.0842918430616629	0.0764417768416917	0.162006712407407
Pdk1	0.0992890456402133	0.0462378774275208	0.0843397338767642	0.113606909748564
Pdk4	0.253699507095905	0.504301517084455	0.463593704011916	0.195743485830282
Pdxk	0.125588702025317	0.337032160526003	0.349195114642338	0.22917610432948
Pdzrn3	0.111977302262882	0.0317379771773892	0.0310739238022437	0.0554476666969145
Per3	0.165475291925589	0.110130921731336	0.0867951076403966	0.173711022288111
Pfkfb4	0.1138940879783	0.214071759269304	0.265423062712945	0.216347769337889
Pgf	0.00306096307493068	0.0199026462890986	0.0142083615954803	0.00517791459676127
Pgs1	0.175556939219762	0.326210907811745	0.379937038328446	0.208245678951462
Phf21b	0.0227320524795622	0.0585576149579719	0.131516574976262	0.0687996656402991
Phyhd1	0.0900863937742787	0.590979422457289	0.836471519326656	0.407654082759107
Piezo2	0.495322850303275	1.11829070051215	1.32265201957326	1.30526335091857
Pik3r5	0.00565543515784473	0.0502285936258441	0.122210241105518	0.0335832887003379
Pim1	0.00214365754770589	0.0386113588776013	0.088999801135887	0.0241152952330748
Piwil4	0.00183770195452845	0.0104153755882521	0.032628448373546	0.00798275806999161
Plaat5	0.0102175587388079	0.0248170249421569	0.0127569640508344	0.0189453983431876
Plce1	0.00702625892247961	0.0345739169908013	0.0113034568890919	0.00762128454309659
Plcxd2	0.00443534557515552	0.0162009479366463	0.076070025180157	0.0402541831042449
Plec	0.00443534557515552	0.0284870243866296	0.1190096327713	0.0510436352123526
Plin4	0.0201815651273928	0.288642822587173	0.645110114245812	0.177149994609064
Plscr3	0.0287076631905885	0.0881338357366645	0.105863190836155	0.0830659444017286
Plvap	0.00214365754770589	0.0773388381873338	0.177463989289062	0.125084735061886
Pml	0.0855938317567239	0.165227824309592	0.186050218284216	0.117663441412285
Pnpla2	0.147650200491195	0.271552821266763	0.410560672854814	0.157426427540988
Pnpt1	0.25036374684472	0.425666144722698	0.379388110729327	0.302803811843707
Pou6f1	0.0518227732674271	0.144422281327143	0.346266966468547	0.27462297209409
Ppm1e	0.0120365964470396	0.0317379771773892	0.0531277861633335	0.0209095413416029
Ppp2r2b	0.0180762683935992	0.0865988095209412	0.103936501586348	0.0566532313082737
Prkar1b	0.0180762683935992	0.045037550410389	0.0714736886974364	0.0483571661977977
Prkce	0.0563244096168151	0.181775637842824	0.478953702326705	0.196267543165343
Pros1	0.0807982658921194	0.622258231881181	1.08551854599079	0.720687606752178
Prss35	0.00229660024814377	0.0199026462890986	0.0164472952394414	0.00969797520894609
Prtg	0.236545391604832	0.12908130347646	0.0569250651312128	0.153840746347523
Psmb10	0.0561795114043679	0.322880920759708	0.708844102596893	0.178217489557905
Psmb8	0.000612942633479883	0.598143241705323	1.52833151508076	0.450292410266399
Psmb9	0.000612942633479883	0.177576625661893	0.687487289219522	0.207357830260323
Psme1	0.0561795114043679	0.212041177478841	0.637504124271709	0.198361030454842
Psme2	0.230355598037859	0.503036116742417	0.689636902611516	0.3461878027085
Psme2b	0.00275528805070549	0.0124854960864383	0.0228727854896342	0.00771166517522494
Ptpn3	0.00168468904746881	0.00834096079995411	0.0205171961894224	0.0143772651684453
Ptpn5	0.000306518279073199	0.0333594988829297	0.0227420648862404	0.0049060601579867
Ptprn2	0.00214365754770589	0.0124854960864383	0.0352139645837203	0.0154539989298577
Qpct	0.37010859900409	0.138970337708753	0.140272274726863	0.210461858086643
Rab3b	0.0766896781689202	0.183868550500218	0.146991170361631	0.184598638922167
Rab7b	0.182349750181651	0.0988135447458102	0.0295169789213799	0.112793625017189
Ralgps2	0.00214365754770589	0.0597418322293653	0.476963553483822	0.185885122501307
Rasgef1c	0.0778247687555176	0.335536193015638	0.405045823904886	0.243128329769521
Rasip1	0.00137859297658287	0.0761752893379666	0.158242202966643	0.0683744708857694
Rb1	0.86916078598069	1.51339919776866	1.45922344486925	1.36021798704207
Rbm3	0.263169390966298	0.442218684529488	0.770864037485111	0.412067014557079
Rbm43	0.00580784174037275	0.0341692748006526	0.125282656696758	0.0411286287417918
Rbp1	0.00489305363388297	0.0406239833776147	0.481105236742923	0.153215835054823
Rfx2	0.00489305363388297	0.0182591384638778	0.0530009615292285	0.0220683605291191
Rgl1	0.083762947549825	0.279817806109114	0.403707004604939	0.421313099178608
Rgs17	0.00290813724247059	0.0260418552440025	0.0944903627375998	0.017156459882186
Rgs20	0.00672179377435369	0.459031099106754	1.06456930550509	0.313045333141683
Rhbdl2	0.142745238293951	0.0730658573010358	0.0590704732019445	0.0941518695030997
Rhoj	0.215514884441063	1.2681337968198	1.41580450684784	1.12970793677378
Ric3	0.107719870704181	0.252865622010649	0.291639395086084	0.143479437642911
Rims1	0.336520567656335	0.222488412800439	0.305726365734764	0.242771169494467
Rnf125	0.0724215763454648	0.260317899287976	0.375629019225481	0.150868933520435
Rnf19b	0.0625352540840655	0.141154683291339	0.331880153128051	0.15773761914328
Rnf213	0.088263723963194	0.689619089471406	1.2227613383339	0.443593610019282
Rnf217	0.0451053566642789	0.0972948373232111	0.394645317400605	0.148673511524948
Rnf31	0.063111050796755	0.123544843130454	0.144332179593551	0.121461635282996
Rsad2	0.00351930048785166	0.26160829730701	0.543588502683104	0.154231117690405
Rtn4r	0.0257243213188557	0.0104153755882521	0.0337927579948385	0.0316439056761061
Rtp4	0.147782433707832	0.347441736168698	0.604371147616857	0.210388064523188
Rundc3a	0.203206495681009	0.348624531649407	0.357273762645562	0.263138447255599
Runx1	0.00107240318220319	0.0466376664721654	0.297119186500716	0.117015501135799
Rwdd3	0.0555997085083486	0.0288939719308479	0.0343097941201012	0.0656489349439998
S100a10	0.00519807599408168	0.0800485320893069	0.319228973207974	0.134204931504895
Samd9l	0.0112790661509645	0.244373887346111	0.72626716527687	0.171488512592168
Samhd1	0.150687149366276	0.26675330229468	0.492938329487452	0.210314265513841
Sap30	0.00961047678152452	0.0353827104962159	0.0297766381318117	0.0134791005665856
Sat1	0.469300404906497	0.791995021455439	0.762227172969138	0.57496149681994
Sbno2	0.146062036508128	0.5220995098357	0.586305345613722	0.453885405327859
Scrg1	0.184008888062937	0.49846737122482	0.31210900876204	0.122348494851789
Scube1	0.00382474209739653	0.0738441222081348	0.077061055999511	0.0383277068714403
Sdc1	0.00321376555522446	0.0166129250734579	0.037921581153418	0.0378893532902867
Sdc3	0.00535055229178419	0.0260418552440025	0.12410207525675	0.0184090527562977
Sdk2	0.245698887804911	0.431123453404394	0.461572719363373	0.441194449262502
Sema3e	0.030344715360425	0.137511452050118	0.284923186188333	0.178750810006667
Sema4b	0.00687403793579491	0.0309262292578087	0.12327483817006	0.0748180011564463
Sema4f	0.00168468904746881	0.0116579620639779	0.0134169513621159	0.00771166517522494
Sema6a	1.00742186173465	0.651933873835713	0.540555346469098	0.464186873633081
Serf1	0.0374570192830779	0.0137255145116264	0.0245706001640373	0.0377139580405893
Serpina3c	0.000612942633479883	0.0186702687193499	0.143869023828364	0.0142874850010502
Serpina3g	0	0.0341692748006526	0.113891124520353	0.0160815586431696
Serpina3i	0	0.0636791254503007	0.192690052421417	0.0228698340435974
Serpina3m	0.000306518279073199	0.0458379284876695	0.158356359475455	0.0164399874506897
Serpina3n	0.125318281794419	2.49549431243432	2.88927258864432	1.68389634708279
Serpinb1a	2.20642723890472	1.44065076285893	0.736820399757828	1.20461266668112
Serpine1	0.000153270883718479	0.0280799111686847	0.0314627815550079	0.00390862777433356
Serping1	0.000306518279073199	0.0831363609723325	0.667929956046883	0.113037679894497
Sez6	0.0103692716598997	0.0248170249421569	0.0518588154384327	0.0187666484419402
Sgk1	1.42534878475642	2.23276207024274	2.08418086449747	1.13934358248491
Sh3rf3	0.00122550979841676	0.0145513400371919	0.0287375965073874	0.0133892397219737
Shank2	0.00183770195452845	0.0695561502261401	0.225350344002175	0.0534639356372106
Shfl	0.00122550979841676	0.0120718146767755	0.0499523349454609	0.0141079004812057
Shisa5	0.0609501014757902	0.157386936802538	0.333126928039124	0.151964839705456
Sik1	0.0121880336683324	0.0284870243866296	0.10634428368631	0.0552753244759201
Slc10a6	0.000306518279073199	0.170185658960195	0.0967995789848604	0.0106896526470144
Slc14a1	0.00107240318220319	0.00792556095834617	0.00466984846504569	0.0041807534678947
Slc16a1	0.967394586549655	0.581893362802595	0.43058346534489	0.575268955502452
Slc16a2	0.0384900167952166	0.101844057639523	0.347023438822675	0.238259986179612
Slc1a4	0.00748278290452147	0.0329543648898555	0.0415203701133545	0.0139282837049686
Slc25a20	0.0186782341549897	0.0361908503833027	0.0599525404364891	0.0352551888908247
Slc25a22	0.0267695036881174	0.0581625640244486	0.0778036851151071	0.049484628775463
Slc25a30	0.0632549481864226	0.134953269577289	0.153894570748518	0.140239177829896
Slc2a10	0.000459742193262117	0.0231815807148979	0.0674813703440388	0.0245597271459291
Slc30a1	0.160004317384313	0.0750103850654203	0.177911847239591	0.127973793129614
Slc38a3	0.054293921557556	0.137511452050118	0.191255158304665	0.196417223402983
Slc39a1	0.160396095461568	0.390015907473229	0.485641363097138	0.293067964693106
Slc39a10	0.200701451845678	0.353047596412632	0.250960603557882	0.310511460832775
Slc39a14	0.106480439518171	0.68266044080799	0.967636159310106	0.568998639180255
Slc3a2	0.565212666662391	0.998003429739663	0.520254719423816	0.507602991532271
Slc4a8	0.142612337267967	0.283924822637877	0.370194675519711	0.469896014653183
Slc6a8	0.375493245688947	0.674373662643965	0.859609294220427	0.58424594321687
Slc7a1	0.0153629292098107	0.0777263871434925	0.17027084850892	0.0513032334834115
Slc7a14	0.0133987065501217	0.0730658573010358	0.0954633143363738	0.0366609400176042
Slc9a3r2	0.0420236432758895	0.159531465047787	0.463930138050657	0.262438158160259
Slc9b2	0.137281760646896	0.0426325653549684	0.0279576061826218	0.124763212777147
Slco5a1	0.000306518279073199	0.00417917682815104	0.0292572522705306	0.00363642800822183
Slfn8	0	0.0178478391107953	0.0740850122395887	0.0269562522893178
Slfn9	0	0.0137255145116264	0.0439550503199297	0.0105094207901385
Snhg1	0.193527455534512	0.337032160526003	0.301481501549473	0.220228193620955
Snhg15	0.0230316826004077	0.0652497123306917	0.0479147415467372	0.0289047389383387
Snx10	0.0284097291997118	0.50909548785229	1.15899268742651	0.765053041299176
Snx22	0.0269187263190687	0.103733475018749	0.0970423444684668	0.0433114033085781
Socs1	0.000919273120764033	0.0549965255985368	0.0735881427246268	0.0128499050138426
Socs2	0.00153165272387637	0.0715075080376813	0.191255158304665	0.0497446320248883
Socs3	0.00580784174037275	0.277282001747689	0.353054704527169	0.153606450373751
Sorcs2	0.00199069145222025	0.0542034472902945	0.0564195936125209	0.0192134633002198
Sowaha	0.138483620244413	0.0722869862258811	0.0743333544479829	0.122831905131161
Sox4	0.0188286689931898	0.0892835610483347	0.301976017207929	0.182855463801634
Sox5	0.0121880336683324	0.133488507386084	0.177911847239591	0.133089377309511
Sphk1	0.000153270883718479	0.019492022493232	0.0231341754439592	0.00481542558595087
Spink10	0.0152119720596772	0.0410260226548694	0.0484245292586013	0.0303194392913703
Spred3	0.00702625892247961	0.0174363705209455	0.0902225338178703	0.0190347613134162
Spry1	0.109232647823276	0.250912381433347	0.247834104037826	0.136670667512028
Spry2	0.211801042000405	0.37141375047113	0.578236811414468	0.213556280731279
Src	0.0103692716598997	0.0454378195246604	0.171848775268544	0.05303216853576
Srsf12	0.0353878174851912	0.0166129250734579	0.0118322494228597	0.0138384632170813
Srxn1	0.0496372655251445	0.120208193782494	0.213321937074323	0.145213794931701
Ssbp4	0.00535055229178419	0.0252254684220357	0.0546484285069107	0.0481835975352395
Sspo	0.0809396406921611	0.209327305166025	0.154467708694951	0.302063435892495
St6galnac5	0.00580784174037275	0.104865414266037	0.0937600273052994	0.0729570346396404
St8sia5	0.275929449599975	0.532726551982917	0.661945993115532	0.638212092662365
Stat1	0.267870914327707	1.25913839631755	1.93940433261123	1.06512981762158
Stat2	0.186683232485514	0.799365617536341	1.17092371151741	0.524832317753922
Stat3	0.634931719434578	1.29602046988122	1.42832104012382	1.34022455216194
Stau2	0.243538514447314	0.145146966512146	0.160978368846278	0.201865275597118
Steap3	0.00214365754770589	0.149844662357051	0.179142423382194	0.109860311121963
Stk32a	0.00168468904746881	0.0211335069735566	0.0711000851995992	0.0146465573178889
Strip2	0.00367203295444615	0.136781210313506	0.0982552886464207	0.0682894102356884
Sulf1	0.00168468904746881	0.0284870243866296	0.122328585652431	0.0311143296089556
Sult1a1	0.00930679754123611	0.117977559661114	0.0517318297551994	0.0118603685961812
Sv2c	0.000919273120764033	0.0781137859636409	0.0252228390263262	0.0123102792668097
Syne2	0.040847154627805	0.258379174764318	0.441994965984831	0.297812508387428
Synpr	0.0411414065770374	0.127239220417893	0.0992245858128998	0.060689887031535
Syt4	0.00382474209739653	0.0585576149579719	0.116036944867075	0.0344635845971511
Syt6	0.000612942633479883	0.0301138218681836	0.072220477214947	0.0296123392869698
Tafa2	0.00153165272387637	0.0104153755882521	0.0399796175863548	0.0636853573677642
Tagln2	0.00580784174037275	0.150565430069263	0.34532057058783	0.284059397323944
Tap1	0.000612942633479883	0.430034371645247	1.28407730755967	0.386530827790601
Tap2	0.00991406382872836	0.319844007076229	0.845412045093934	0.229755318490222
Tapbp	0.118125369574164	0.392564531475164	1.22209175444914	0.423402612582955
Tapbpl	0.0325727490818451	0.173359907403506	0.460813795873358	0.118068190995443
Tbc1d1	0.00214365754770589	0.0133123458625384	0.0652286671342438	0.0258918389936957
Tbc1d10a	0.0484697054159757	0.0862146845114932	0.166315104005181	0.0641979668281548
Tcim	0	0.0104153755882521	0.033146086683661	0.00463413179427898
Tctn2	0.0257243213188557	0.0494317234346233	0.046639134116149	0.0435730163705057
Tenm2	1.9714129562215	1.62363614687221	1.14236224300714	1.78372644422971
Tenm3	0.237150176946007	0.478943625014477	0.82135147301278	0.598813968583994
Tgfbr3	0.139550728595963	0.270594758534139	0.365287668772765	0.348504433282314
Tgif2	0.0117336531873884	0.0549965255985368	0.0983765021856123	0.0855772849624069
Tgm2	0.000612942633479883	0.0116579620639779	0.0451062542192811	0.0128499050138426
Tgtp2	0	0.0398194195912029	0.571387419819423	0.142295194324246
Timeless	0.0185277766827441	0.169125333111817	0.117227080663381	0.0527730187635889
Timp1	0.000919273120764033	0.0482352262523334	0.0468943858094229	0.00960777393068592
Timp2	0.733118688431115	0.409947403355526	0.475717696161112	0.581602028580403
Tiparp	0.15778133767835	0.312211126172073	0.426314014579548	0.339140656246075
Tle3	0.256431296075867	0.528538651497975	0.59858142395343	0.523214440281655
Tlr3	0.0275153942685721	0.126132339609796	0.370287029501321	0.114581979139839
Tmc3	0.0783918312526626	0.159174362896494	0.0363752694969327	0.137464771024202
Tmem140	0.00854719572807053	0.0953932038103405	0.777892251626618	0.351264504612385
Tmem176a	0.00550300534400967	0.0170247325549999	0.077061055999511	0.0787821377396967
Tmem176b	0.00733063139979343	0.0446371210165967	0.111979855415883	0.106836523246714
Tmem220	0.0330177607487913	0.0137255145116264	0.0306849147803036	0.0450541989949427
Tmem229b	0.110468674630692	0.252214965631588	0.235546490316006	0.168491810730131
Tmem236	0.00107240318220319	0.00667832508674155	0.0107743845858337	0.00581195436037384
Tmem238	0.146062036508128	0.0769511389787497	0.0806453319764761	0.0889159584285257
Tmem53	0.0150609921180419	0.0325490666967036	0.0292572522705306	0.0180513291502356
Tmem81	0.177997407046185	0.0892835610483347	0.0540151085217934	0.103392998585723
Tmsb10	0.179151342624928	0.430579060787198	0.553786836070768	0.353697312741249
Tmsb4x	2.77795408255337	3.37801217315897	3.4112848708322	3.29144460576413
Tnc	0.00244951956068899	0.0466376664721654	0.00945047789124138	0.00163802922275416
Tnfrsf12a	0.012642207781421	0.204560233869143	0.195663654497165	0.0745644368309661
Tnfrsf1a	0.00122550979841676	0.0656419739246193	0.24574432722971	0.125486492599002
Tnfsf11	0	0.0182591384638778	0.108386350108767	0.0892492135222023
Tnfsf9	0.0225822037455846	0.0438357808766441	0.0994667633729784	0.0483571661977977
Tor3a	0.0114306181253069	0.0660340817097202	0.141898215146995	0.0349034421206698
Tox2	0.00229660024814377	0.0244084145680326	0.100797692599649	0.0646249407439909
Trabd2b	0.0103692716598997	0.000418704507592392	0.00546820883500981	0.0061740823857486
Trib1	0.012490839328582	0.248628768346	0.378197732887871	0.151417036739234
Trib2	0.0177751495723071	0.00501292041160023	0.00905296385922754	0.00834410098098876
Trib3	0.000612942633479883	0.0124854960864383	0.0557873947032117	0.0087053133704482
Trim12a	0.00137859297658287	0.11200476106174	0.696324815543678	0.203798531683848
Trim12c	0.00885110569623134	0.0881338357366645	0.431278790834545	0.129335174608201
Trim21	0.0146079154752782	0.133121981353795	0.243440517391693	0.0947319487339888
Trim25	0.0337590070644171	0.205924574692231	0.394555185927115	0.142769059956859
Trim30d	0.00122550979841676	0.0186702687193499	0.157328481450943	0.0206419307190969
Trim34a	0.000766119606917842	0.0410260226548694	0.348534668941097	0.0704986390554704
Trim56	0.0174739400511583	0.124284811268633	0.391485872193808	0.144425823581848
Trim7	0.235334722519269	0.141881739467224	0.172749331067981	0.261597163397282
Trio	0.00961047678152452	0.0309262292578087	0.0309442709417612	0.0250039616268
Trpv4	0.00869916225730948	0.036998337707639	0.0702278005118336	0.0467070462947932
Tsc22d4	1.35568416548318	2.01340402876487	1.61017014454567	1.59949283801155
Tshz3	0.0304934054810315	0.0892835610483347	0.10116036608017	0.0458374672152037
Tspan4	0.00489305363388297	0.254165666083232	0.646442241523384	0.154777381682123
Tspo	0.0261723903906423	0.105619329231192	0.333989170208502	0.141583974580432
Tsr1	0.055164635617206	0.0984340840671952	0.0991034750355699	0.072279459977897
Tst	0.247615309344995	0.138970337708753	0.1190096327713	0.15874832356787
Tubb2b	0.680195872361242	0.206946610135988	0.342855741368572	0.331193672583374
Tubb3	0.660515748484514	1.33743439861047	1.56660413773005	0.864911192279691
Tubb6	0.000612942633479883	0.0104153755882521	0.0265260418899944	0.00861502250432102
Txnrd3	0.0524047695438306	0.0190812300161967	0.0256139782418649	0.05303216853576
Uba7	0.00214365754770589	0.0337644688089185	0.243964576786533	0.0635144291380092
Ube2l6	0.00168468904746881	0.0410260226548694	0.158584633405389	0.0271335444069296
Ucn2	0.000153270883718479	0.113875095684543	0.0239179356085462	0.0135689533369516
Unc79	0.0254254970288394	0.0605305320324406	0.0911996446487334	0.0271335444069296
Usp18	0.00793909856751618	0.186999729303606	0.422289302170584	0.100596672180239
Usp35	0.0515316480600476	0.105619329231192	0.229079742025946	0.161309379459071
Vat1l	0.0368662555377732	0.0892835610483347	0.218709646881069	0.0710925984685442
Vav2	0.0430519366505502	0.118721657363921	0.21169994747543	0.107491090405085
Vav3	0.00656952643109844	0.051820431528328	0.174884906352245	0.059231700362825
Vgf	0.000153270883718479	0.0605305320324406	0.0235261323112502	0.00381790275123761
Vim	0.0102175587388079	0.0621060679459227	0.281497629408946	0.120251012395158
Vwa5a	0.265640446645191	0.488496228208298	0.821410293416078	0.61129652762232
Wfs1	0.0844675305416727	0.165227824309592	0.163707068546252	0.111979678315353
Wnk4	0.00183770195452845	0.0235906925910996	0.0723448877656944	0.005359109839715
Wnt5b	0.0628231938831415	0.0313321855844323	0.0149991459939468	0.0599181707303941
Wsb1	0.301084696175994	0.606398618230333	0.52627768657245	0.533844375614712
Xaf1	0.388985203500466	0.757254692616374	1.18037530328098	0.715669013562037
Zbed5	0.0508034640273084	0.0244084145680326	0.0180247063085697	0.0414781930056357
Zbp1	0.000459742193262117	0.0946315367097689	0.97568361526056	0.27268335149607
Zbtb16	0.61747711902988	1.44569512467727	1.29980286419058	0.974329389709944
Zc3h6	0.315834896393739	0.1677098141473	0.296522848208766	0.476534594011119
Zc3hav1	0.0483236645059186	0.316187494441382	0.773273989375114	0.306430455323326
Zfand4	0.184518838715355	0.98040534549295	1.10009089757804	0.782612225800479
Zfas1	0.173368302782202	0.35627878859066	0.467623461290792	0.262508209142131
Zfhx2os	0.187191821522519	0.116487701148521	0.154353107381621	0.225403012567992
Zfp469	0.00535055229178419	0.014963997195271	0.0570513930988706	0.0166191536892551
Zfp703	0.0159665300328815	0.0640720034880976	0.147683658914336	0.0774344079117569
Znfx1	0.407002046076856	0.943763117409767	0.868626791015889	0.586021573352878
0610043K17Rik	0.0563244096168151	0.0378051735222467	0.0779274030342033	0.0493112557117554
1700063D05Rik	0.314492748888108	0.195990670074257	0.0758221139395399	0.1329299107872
2010300C02Rik	0.0117336531873884	0.00626223386821858	0.0885102891346899	0.0326140673389627
2210011C24Rik	0.0291543978092468	0.014963997195271	0.0359883176875321	0.0712622363803915
2210408F21Rik	0.160265519822858	0.21643557174161	0.748023284567928	0.444061068562206
2210409D07Rik	0.0399638789178902	0.0301138218681836	0.0124928471146956	0.024826291515063
2610307P16Rik	0.00290813724247059	0.00584596944572232	0.0882654432465073	0.0480099987413707
2810410L24Rik	0.247375957405502	0.203535755300553	0.33580702140013	0.604154283980176
2900052N01Rik	0.00290813724247059	0.00501292041160023	0.000267436761324847	0.00045527732483543
3110082J24Rik	0.0709948179621669	0.0972948373232111	0.025353235764454	0.0316439056761061
4921528I07Rik	0.0221325227686674	0.0112439381062813	0.00333782981458133	0.00987835336032354
4930506C21Rik	0.35882335529779	0.243389415406875	0.0904669010475593	0.166951550028891
4930570G19Rik	0.0423175492954428	0.0406239833776147	0.0828636105450904	0.0520816241937737
4930579K19Rik	0.00687403793579491	0.00501292041160023	0.0163157319323369	0.011410255414826
4931428F04Rik	0.0192798377715903	0.0153764841376583	0.0327578830735	0.0339355000550217
5330413P13Rik	0.0132474525726856	0.00667832508674155	0.0500795467858491	0.0492245579067664
5930430L01Rik	0.0203317739991194	0.019492022493232	0.0508424781755002	0.0459244591586041
8030451O07Rik	0.0829167921387842	0.0546000650660639	0.0203861672788196	0.0216228197460086
9330159M07Rik	0.00458793820665579	0.00501292041160023	0.028087646826358	0.0166191536892551
9330185C12Rik	0.00793909856751618	0.00667832508674155	0.0291273636440001	0.0105094207901385
9330199G10Rik	0.259510445713766	0.266111622447281	0.0963138711408382	0.192968896922743
9530082P21Rik	0.0185277766827441	0.0248170249421569	0.0832328457038937	0.0270449022771856
9630009A06Rik	0.127614526187021	0.126132339609796	0.0462561343719709	0.0727876840106646
9630014M24Rik	0.0406999961777395	0.0100008367435087	0.145489131379436	0.0393789721422416
A230001M10Rik	1.48232722470988	1.15140800710738	0.440102069513896	0.81900244893099
A330072L02Rik	0.226085422283103	0.211702345945618	0.076070025180157	0.0645395605441162
A530053G22Rik	0.0619591256385019	0.164162225679115	0.033663457182979	0.0283737098997602
A830019P07Rik	0.0143057502963191	0.00667832508674155	0.0571777051097887	0.130374981929946
A930003A15Rik	0.0165697667417672	0.0272651871716469	0.00785947277844183	0.0199279520745325
AA467197	0.00687403793579491	0.0070942432453686	0.0367620716325451	0.0141079004812057
AC106834.1	0.00854719572807053	0.012899006434555	0.0589444000593092	0.0298775603846984
AI429214	0.0117336531873884	0.00834096079995411	0.0245706001640373	0.0144670372760856
AW011738	0.000919273120764033	0.00209177160235687	0.0185499575433812	0.00608356267272915
AW047730	0.0127935533253192	0.0137255145116264	0.00240435994017945	0.00363642800822183
AY036118	3.42148912419809	3.33027143671453	4.43949025676405	3.61373624987815
Aass	0.00778701648134303	0.00459613551091848	0.0555344031878934	0.0217119437845729
Abca1	0.297903560845607	0.352458983558321	1.09728264615612	1.28129997456105
Abca5	0.344698212007331	0.317102876809228	0.552633158713932	0.555346243430744
Abhd15	0.0233312229699354	0.0390142079606378	0.186938080911626	0.0755783085917737
Ablim2	0.352809524562376	0.385753713038615	0.638422728678116	0.733584299726028
Acot11	0.0180762683935992	0.0297073705370852	0.0801517122176649	0.112061102804923
Acsm3	0.0188286689931898	0.014963997195271	0.0350848474163612	0.0251816001774758
Adam1a	0.06870776194256	0.0738441222081348	0.0340513094732638	0.0649663886643709
Adamts20	0.248811210455635	0.179328357310746	0.0799048109355053	0.186943338263715
Adgra2	0.0105209615676725	0.0166129250734579	0.0465114838328187	0.041740286036288
Adgrb1	0.122745635798152	0.0707274217892351	0.0174991790399051	0.0582011104239863
Adgrb2	0.0418766578669839	0.0394168948216394	0.124574475098612	0.100514308795145
Adgrg1	0.0153629292098107	0.0284870243866296	0.0709755196761979	0.0653077200378622
Adgrv1	0.384612426827508	0.308218883253698	0.058313795819304	0.150790608530996
Adm	0.000153270883718479	0.00417917682815104	0.062468453806555	0.00671702866114316
Adra1b	0.172336696388405	0.110130921731336	0.284420163185602	0.188981026005624
Aff2	0.188716038495987	0.310984440405016	0.436910459111205	0.268235754718417
Agtrap	0.0287076631905885	0.0313321855844323	0.0595746068882029	0.0471415524359608
Airn	0.0330177607487913	0.0293007539361259	0.108266343918704	0.0717709775221196
Ang	0	0	0.00799215326207374	0.0164399874506897
Angptl1	0.000153270883718479	0.00209177160235687	0.0152626018900229	0.00390862777433356
Ankrd42	0.0287076631905885	0.0219532398914686	0.0476597502013554	0.0647103136547093
Anks1b	1.58181905125839	1.58439501768136	2.36647686752145	1.91206314730279
Anxa11	0.00596022509867385	0.0112439381062813	0.0419051876059031	0.0234927585350204
Anxa4	0.0570485859138934	0.0648572968072233	0.216773413624466	0.261316674564558
Anxa6	0.0120365964470396	0.012899006434555	0.0491887238757798	0.0295239166204831
Anxa7	0.0902264616379478	0.0777263871434925	0.146298201936204	0.152903232904641
Aox1	0.0315336177400672	0.0178478391107953	0.090955456433838	0.0694796014268436
Ap1g2	0.012490839328582	0.0157888010047194	0.0416486590654078	0.0335832887003379
Apeh	0.0197308030885161	0.0227723013976646	0.0424180473505843	0.0276652322427777
Apoc2	0	0.000418704507592392	0.025353235764454	0.00209256156980109
Apod	3.92790528380091	4.33552450888305	5.80244956828019	4.82820709406857
Arg1	0.00351930048785166	0.00459613551091848	0.0309442709417612	0.00436212946542259
Arhgap26	0.0129448759672098	0.00958612598504419	0.0233954970914304	0.0239374671476583
Arhgap29	0.0376046557039754	0.0317379771773892	0.0733396153567255	0.0511301754575062
Arhgef3	0.0491995902182583	0.0773388381873338	0.153321104126594	0.0634289540657106
Arrdc1	0.0123394479598657	0.00792556095834617	0.0416486590654078	0.0404291334148667
Asic3	0.0213826048195376	0.0203131015422689	0.00772677468836313	0.0120403571555143
Asrgl1	0.834236780418435	0.580722490009004	0.23374848099948	0.352097447290388
Astn1	0.0141546334610177	0.00750998848799739	0.104659445140222	0.1009260579001
Atf5	0.0712803325364562	0.107501633690791	0.264294267423387	0.128534586447004
Atp10b	0.527130228343897	0.414107928625371	0.231629028658681	0.391037754571389
Atp7b	0.00153165272387637	0.00250960137389276	0.0244401013261727	0.0138384632170813
Aven	0.468245289053013	0.725124659807836	0.387227424973872	0.375017360697422
Avpi1	0.0233312229699354	0.0305201080637147	0.0595746068882029	0.0281080895960809
Azin2	0.00474050755719733	0.00501292041160023	0.0201240579406371	0.00798275806999161
B4galt5	0.00336654469048739	0.00834096079995411	0.0256139782418649	0.0216228197460086
BC051408	0.117716672294306	0.112379107943115	0.0416486590654078	0.088332494645315
BE692007	0.000766119606917842	0.00250960137389276	0.0230034890073852	0.00263772781511815
Baalc	0.0155138635753226	0.0317379771773892	0.00480295279700954	0.00399934456714639
Bahcc1	0.107857490501744	0.0781137859636409	0.144795120944778	0.139447275301863
Bahd1	0.0252760513911753	0.0239996371632177	0.0447226668195919	0.0355189177971837
Barx2	0.0737039207330382	0.0546000650660639	0.303655543593075	0.129255144628288
Batf2	0.0149099893780216	0.0178478391107953	0.0977702875089829	0.0354310158896082
Bbc3	0.00733063139979343	0.0112439381062813	0.0368909724369164	0.0342875874005434
Bcan	0.0130961757140229	0.0211335069735566	0.273289152825412	0.035694698435494
Begain	0.178895027545446	0.109755732143639	0.0510966593458949	0.0721947308550725
Bfsp2	0.529570268665999	0.308526545346667	0.600270501464203	0.599064152252635
Bid	0.00306096307493068	0.00834096079995411	0.0765656633575896	0.0226917843224933
Bik	0.00229660024814377	0.00459613551091848	0.0314627815550079	0.0339355000550217
Blvrb	0.0186782341549897	0.0124854960864383	0.0566723613095486	0.0335832887003379
Bmerb1	0.0433455406481634	0.0458379284876695	0.116989166791005	0.0416529293250435
Bmf	0.00854719572807053	0.00917124317021038	0.0210411402135372	0.015902296051191
Bmp7	0.000459742193262117	0	0.0160525533800276	0.00354567828531374
Bmp8b	0.00611258523982493	0.0120718146767755	0.00360437552438371	0.00563084115954639
Bmper	0.00596022509867385	0.00584596944572232	0.0512237257071718	0.0258918389936957
C1ql3	0.172465705401721	0.306987287447624	0.0959494353778093	0.0513032334834115
C2	0.0159665300328815	0.0239996371632177	0.107786175091725	0.0463593053978276
C3	0.00733063139979343	0.00584596944572232	0.0180247063085697	0.0200172272878805
C330002G04Rik	0.0130961757140229	0.0124854960864383	0.0348265630571491	0.0279309701887808
Cacna2d3	0.095952417259722	0.177576625661893	0.618592419205428	0.272059102196248
Cacnb4	1.09852068277255	0.942784774451511	1.42395161190501	1.29996549807111
Camk2d	0.189857678535489	0.274103176842312	0.533520442022146	0.445170407608407
Capn1	0.000612942633479883	0.00292725663662312	0.0363752694969327	0.0115903250003225
Capn5	0.131385119212512	0.197710467897756	0.333414424710336	0.17256206503257
Car5b	0.0451053566642789	0.0248170249421569	0.106103766192523	0.0689696929336598
Card10	0.0310879449745091	0.036594675549941	0.0627196973535085	0.0448800560429568
Carmil1	0.0118851362890413	0.0248170249421569	0.129873652757045	0.019124116298618
Casp1	0.000153270883718479	0.000418704507592392	0.00759405898716433	0.00209256156980109
Casp12	0.000459742193262117	0.00334473753625611	0.0465114838328187	0.0201064945318763
Cast	0.0343516087696905	0.053806672146448	0.186716189146966	0.170567406586458
Cavin2	0.174012516776081	0.270594758534139	0.147222053165564	0.128374391873051
Ccdc122	0.0127935533253192	0.0137255145116264	0.0694795218451438	0.039116259415012
Ccdc149	0.0189790812041533	0.0203131015422689	0.0708509386342938	0.0597465973123438
Ccdc28b	0.282768948651437	0.322577644083411	0.137012441282644	0.171718656586456
Ccdc30	0.0100658227974131	0.00501292041160023	0.0243095854561386	0.0126700621179966
Ccdc40	0.00854719572807053	0.00459613551091848	0.015130882618111	0.0130297155720371
Ccdc85c	0.0365707427378795	0.0293007539361259	0.101885318683409	0.0644541730538406
Ccl5	0.00183770195452845	0.000418704507592392	0.029906442457814	0.0130297155720371
Ccl8	0.000459742193262117	0.00376204421831753	0.0413920647011343	0.00227431667648851
Ccn3	0	0.000418704507592392	0.0105097434281038	0.00209256156980109
Ccnd1	0.0458377002884853	0.0190812300161967	0.166315104005181	0.0594033621386684
Ccnd3	0.327944276661707	0.267394570653082	0.504633036088288	0.515955791574767
Cd109	0.00214365754770589	0.00417917682815104	0.0265260418899944	0.0229588470174217
Cd200	0.0924648833756647	0.106749137021953	0.241971688323966	0.126369791431103
Cd27	0.0227320524795622	0.0297073705370852	0.0126249143024845	0.0257143265752152
Cd81	2.62458112926822	2.69508251471371	1.82736030889482	2.05659889421543
Cdh18	0.00596022509867385	0.0490330500866519	0.381216698800791	0.0857444836361351
Cdiptos	0.0290055084432398	0.0522179953894759	0.0124928471146956	0.0141976967724529
Cdk8	0.842257825774089	0.714522742601884	1.38062090246984	1.10168488234989
Cdyl2	0.0649801036927871	0.036594675549941	0.0758221139395399	0.0727876840106646
Ceacam1	0.0905065385220031	0.114248743197005	0.0397225945427599	0.0667570799960055
Cecr2	0.17375488097779	0.109004930402308	0.205621167660746	0.206913610136442
Celsr1	0.00199069145222025	0.000418704507592392	0.0197307650733808	0.0162607891058308
Cenpm	0.00991406382872836	0.0104153755882521	0.00227093594059313	0.00572140186020905
Cercam	0.148046847695793	0.160602007006931	0.27084401524575	0.127733356830827
Cerk	0.500911592401244	0.67820686432263	1.0676087650422	0.900326702359032
Chchd10	0.0516772212579731	0.0636791254503007	0.312206885775442	0.457811322088537
Chpf	0.0224323325535984	0.0235906925910996	0.0517318297551994	0.0304077916466992
Chst8	0.287609398516069	0.175821820063749	0.414986084073406	0.372071078171791
Ciita	0.00290813724247059	0.00542953167499542	0.0627196973535085	0.0115903250003225
Cldn15	0.00137859297658287	0.00209177160235687	0.01328498874192	0.00554027225690045
Clic5	0.067132371253622	0.0386113588776013	0.372685244129292	0.196791326008156
Clrn1	0.0402583908492541	0.0353827104962159	0.0763178749760233	0.0383277068714403
Clybl	0.0449588235581731	0.0644647272333581	0.143753201361607	0.0805482811278209
Cmtm4	0.0365707427378795	0.0374018369879446	0.0817550863556332	0.0540680965600697
Cmtm5	2.27462113948181	2.05212600369876	0.976943067393646	1.58627013356498
Cnih3	0.00504557644381231	0.00209177160235687	0.0177619771966008	0.0130297155720371
Cntf	0.0159665300328815	0.0301138218681836	0.0872854597579727	0.0421769551612373
Cntnap2	0.0140034937859669	0.00667832508674155	0.0420334272027859	0.0161711778899451
Col27a1	0.0215326334062659	0.0549965255985368	0.181487508354242	0.0862459119903498
Col6a1	0	0.00125558794912177	0.02143391815824	0.0218901680359579
Col6a2	0.0398165904193415	0.0402217823997675	0.106103766192523	0.0905811244164206
Col6a3	0.0414355719675296	0.0211335069735566	0.00732857473270392	0.0233148197007759
Col9a1	0.112936154378956	0.0715075080376813	0.0163157319323369	0.048617462718303
Colgalt2	0.124100484990952	0.133488507386084	0.359049812036398	0.327918378284483
Copz2	0.00275528805070549	0.000418704507592392	0.00984783396863667	0.00309180609696944
Cotl1	0.0917659146726909	0.0785010347640591	0.246580762085936	0.161076827040359
Cpe	0.50859155572315	0.486438518625821	1.46474088776533	1.12640641853917
Cpped1	0.20956609799337	0.205583663955451	0.352302782638228	0.288027706076403
Cpt1a	0.0284097291997118	0.0325490666967036	0.123156605560624	0.0555338266705008
Crlf1	0.000459742193262117	0.00250960137389276	0.0740850122395887	0.00372716949636501
Crlf2	0.00687403793579491	0.0137255145116264	0.060204416806572	0.024826291515063
Crmp1	0.0162681938741395	0.0166129250734579	0.124928628587831	0.0732110068209268
Crybb1	0.0176245561526296	0.0297073705370852	0.00693021615067291	0.0147363052549447
Cryl1	0.0114306181253069	0.0070942432453686	0.0210411402135372	0.023670665712669
Cspg5	0.0995665961213497	0.0911968372854131	0.326588068162428	0.100349561670981
Cstad	0.0114306181253069	0.00875618815618156	0.0402365745860792	0.0333190487507479
Ctdsp1	0.0694230289928191	0.0835216700365786	0.15584190102223	0.12250965757803
Ctps2	0.167551624764454	0.134587280123655	0.259456828305845	0.242413881610373
Ctsb	1.24141100135156	1.43717416352224	2.11944003982319	1.84195047026295
Ctxn1	0.00854719572807053	0.0112439381062813	0.0334048053923488	0.0164399874506897
Ctxn3	0.0404056142948419	0.051820431528328	0.0130210112476361	0.0570834381168673
Cxcl14	0.00869916225730948	0.0244084145680326	0.0957064043962996	0.038765868382923
Cyb5r2	0.0300472687765149	0.0297073705370852	0.0714736886974364	0.0602612292794268
Cyp26b1	0.00107240318220319	0.00417917682815104	0.0258746527503583	0.0141079004812057
Cyp2d22	0.0316821312007983	0.014963997195271	0.033663457182979	0.0258030867232878
Cyp2j9	0.127344653299291	0.0628929060118188	0.0252228390263262	0.0294354861347372
Cyp4v3	0.00535055229178419	0.00542953167499542	0.0332754544049261	0.0198386688904091
Cyp51	1.53428538362453	1.69670652874476	0.971187046580857	0.482005154360461
D430041D05Rik	0.00168468904746881	0.00167376717612451	0.0231341754439592	0.0054496951507854
D730003I15Rik	0.078108340199074	0.0589525098878824	0.116870188625322	0.172715335627338
Dag1	0.105101489650025	0.0919611239802507	0.26172407499141	0.145135025731293
Dap	0.0300472687765149	0.0223628545022831	0.0719716096698663	0.0493979460008866
Dclk2	0.128154053566582	0.134587280123655	0.21827969669546	0.178979288871394
Dclre1c	0.0752690006772132	0.0953932038103405	0.202349414295228	0.159292126206896
Dcst2	0.00336654469048739	0.00334473753625611	0.015130882618111	0.0175145036900567
Ddah2	0.195042053440147	0.148762535777706	0.0709755196761979	0.279248992337467
Defb47	0.0132474525726856	0.0223628545022831	0.00931799077061739	0.00987835336032354
Depdc7	0.491860824981967	0.325001286043573	0.091321716399364	0.19761385943731
Dera	0.0872809086057875	0.0900493108742525	0.179589530431036	0.111409521174214
Dgat2	0.0642616505500587	0.0707274217892351	0.125400638219454	0.168953426701636
Dgka	0.0115821471351287	0.0256337451439472	0.103213035006952	0.0438345610089393
Dgkh	0.0327211083091799	0.0454378195246604	0.161888762974935	0.101255335160733
Dglucy	0.0213826048195376	0.0112439381062813	0.0507153633581713	0.0526866205799153
Dhcr7	0.480549443010993	0.48437656614246	0.231416836150689	0.213850488862439
Dhrs3	0.00107240318220319	0.00125558794912177	0.0260049645273327	0.0153643153841076
Diras1	0.0365707427378795	0.0406239833776147	0.104659445140222	0.115961701952338
Disp1	0.00397742792382517	0.00292725663662312	0.016184151314051	0.00698839129234264
Disp3	0.00290813724247059	0.00125558794912177	0.0134169513621159	0.00481542558595087
Dlg3	0.0857345302552134	0.135684846884669	0.298310797285719	0.151495312680973
Dlg4	0.00778701648134303	0.0120718146767755	0.0439550503199297	0.0288162536790315
Dll1	0.0222824388968713	0.0124854960864383	0.0526203910914186	0.0133892397219737
Dlx1as	0.169753014849186	0.144422281327143	0.040750290589619	0.0725336042807389
Dnaic2	0.0665588860173927	0.0919611239802507	0.0521127384390441	0.0584588574991376
Dnaja4	0.10689375395808	0.0632860929986835	0.131047443991156	0.127091910599077
Dner	0.072849207212584	0.0904319660096076	0.371025554461512	0.134204931504895
Dock6	0.0071784567414621	0.0120718146767755	0.0332754544049261	0.03279035929102
Dpy19l3	0.00945864868901539	0.014963997195271	0.0368909724369164	0.011410255414826
Drc1	0.00443534557515552	0.000837233775091364	0.023787351565352	0.0121303392881829
Dtx1	0.00748278290452147	0.00667832508674155	0.0314627815550079	0.0312026117648569
Dusp18	0.0123394479598657	0.0100008367435087	0.0822479154862894	0.0341995771852465
Dusp3	0.656469214679442	0.599753800247159	1.07539539554062	0.849802314715719
Dusp6	0.00229660024814377	0.00667832508674155	0.060204416806572	0.00689794526366028
E230016M11Rik	0.0889651440196033	0.0738441222081348	0.164614982994789	0.199779119205601
E2f3	0.132056945855348	0.0950124427771495	0.198628440472706	0.179968761165665
E330020D12Rik	0.769418224355994	0.787432119057551	0.421412217113375	0.890655741141128
E430024I08Rik	0.101922670122223	0.137511452050118	0.371671316690231	0.235457115984035
Ecm2	0.029898512300053	0.045037550410389	0.023787351565352	0.0443574451584251
Eef1a2	0.00275528805070549	0.00459613551091848	0.0244401013261727	0.00825377749331783
Efcab12	0.0162681938741395	0.0162009479366463	0.0306849147803036	0.0166191536892551
Efhd2	0.0761216493482246	0.131287333360095	0.261929933657709	0.122912450796513
Egln3	0.00244951956068899	0.00292725663662312	0.0319810234543236	0.011410255414826
Ehbp1	0.698658082338948	0.825018443879138	1.23718584736316	1.17622552128344
Elavl4	0.0297497336918095	0.0248170249421569	0.0775562033490738	0.0261580485529115
Emb	0.00458793820665579	0.000418704507592392	0.00839008912099384	0.00608356267272915
Enho	0.180303948170975	0.214071759269304	0.076070025180157	0.110920556183215
Enpp3	0.13326509757818	0.102222226815135	0.0639749691098398	0.134921416894
Epb41	0.00458793820665579	0.00417917682815104	0.0249619945290541	0.011410255414826
Epb41l5	0.0593624321688441	0.0621060679459227	0.126697517103037	0.0971315558734291
Ephb2	0.0115821471351287	0.0100008367435087	0.0323695287027684	0.03279035929102
Ephx1	0.234850044185211	0.132755320930914	0.387590552846941	0.456081199631578
Erbb2	0.000153270883718479	0.00167376717612451	0.0235261323112502	0.0210879086451945
Erich6	0.0493455032726636	0.0711175409802756	0.0216956844394868	0.035694698435494
Erp27	0.0307907194124208	0.053806672146448	0.165522073882346	0.0691396913226545
Esrrb	0.00290813724247059	0.00167376717612451	0.0118322494228597	0.00744049876917183
Esyt3	0.0112790661509645	0.0133123458625384	0.115560493666645	0.0734649145167216
Etnk2	0.00413009044085118	0.00250960137389276	0.0117000775016271	0.0097881683516695
Etnppl	0.0168712486906184	0.0112439381062813	0.0984977010338626	0.0344635845971511
Exd1	0.0143057502963191	0.00584596944572232	0.0309442709417612	0.0327022171998479
Fabp5	1.74878636208032	1.8270683370558	2.50353932566696	2.09783134992746
Fam114a1	0.0237803653580758	0.0223628545022831	0.143173887719665	0.0739725365827647
Fam13c	0.75863733124001	0.523837207722558	1.51301513300339	1.60215689401556
Fam149a	0.00351930048785166	0.00334473753625611	0.0124928471146956	0.0097881683516695
Fam155a	0.0112790661509645	0.0157888010047194	0.117702738666403	0.0115002942607062
Fam181b	0.0195805039117104	0.0145513400371919	0.0560403222300114	0.0126700621179966
Fam189a1	0.00367203295444615	0.00626223386821858	0.0737123832502197	0.0358704481804018
Fam49a	0.00778701648134303	0.0133123458625384	0.0638495128172989	0.019302802319648
Fam57a	0.472363517987663	0.627861970215025	0.298112294068794	0.339529866880845
Fam83b	0.028558707290733	0.0239996371632177	0.0966781741388247	0.166720306167288
Fam83d	0.033166053974121	0.0530126492546585	0.145257848080476	0.0523409531794058
Fam83f	0.00519807599408168	0.00292725663662312	0.028087646826358	0.0218010598807509
Far1os	0.38429935273839	0.407721358343714	0.158926946625668	0.171795359482443
Fbln1	0.000919273120764033	0.000418704507592392	0.00785947277844183	0.00816344584657752
Fbln7	0.0267695036881174	0.0256337451439472	0.00347111155030942	0.0224246502860287
Fbxl16	0.0111274912051397	0.0133123458625384	0.0498251069201615	0.0446187847409577
Fbxl7	0.0935822180946826	0.0815936383662476	0.557699413180379	0.416400502608213
Fcer1g	0.00656952643109844	0.00167376717612451	0.0348265630571491	0.00753089574157121
Fdps	1.25688254777858	1.54837026951653	0.643495161230662	0.314841822399511
Fez1	2.58371141207144	2.24782687908862	1.50820244945678	1.93527721345894
Fgfbp3	0.0689939301584243	0.0668178363355882	0.198628440472706	0.073887950797528
Fibin	0.23375865826865	0.0991928614886349	0.0292572522705306	0.0917450929998335
Flna	0.0489077002220523	0.0510248293205411	0.110064926365566	0.0680341848649421
Flt3l	0.00641723589896841	0.00834096079995411	0.0394655054213362	0.019302802319648
Flywch2	0.0406999961777395	0.0260418552440025	0.0463838172528131	0.0654783420443825
Fmn1	0.503509021421262	0.398204991943264	0.984566583296539	1.16370285579109
Fn3k	0.44592487554837	0.297390638945076	0.133507929993661	0.334914469292015
Fndc5	0.00961047678152452	0.00958612598504419	0.0014700178855538	0.0027285599679533
Folh1	0.98678029767041	0.771295979981307	0.396626157300172	0.662076150329889
Foxj1	0.0404056142948419	0.0244084145680326	0.0858136814795972	0.0854936751411004
Foxp4	0.0249770930971581	0.0329543648898555	0.0897336201394679	0.0748180011564463
Frrs1	0.00489305363388297	0.012899006434555	0.041135404479294	0.0182302069490388
Fuca2	0.128693290013309	0.106372676236739	0.217204011785242	0.168953426701636
Fxyd1	0.0231814640007256	0.036998337707639	0.266345675698139	0.540762675960397
Fxyd3	0.0195805039117104	0.0398194195912029	0.0779274030342033	0.0404291334148667
Fxyd5	0.000766119606917842	0.00250960137389276	0.0383077857499721	0.0123102792668097
Fxyd7	0.00565543515784473	0.0112439381062813	0.2656281613951	0.501830039075937
G630055G22Rik	0.0203317739991194	0.0104153755882521	0.00307121303922091	0.0167982878330296
Gabrb3	0.00626492217089964	0.00584596944572232	0.0241790525494886	0.00463413179427898
Gale	0.017021955587631	0.0305201080637147	0.0949769568663338	0.0240263851432201
Galns	0.0191294707946858	0.0317379771773892	0.0728423752465774	0.0618035380099253
Galnt13	0.0948377291853124	0.0904319660096076	0.0241790525494886	0.021533687763642
Gamt	0.90470656803467	0.822445773379218	0.249398575672262	0.653537282116369
Gask1b	0.0644053824785315	0.036594675549941	0.0123607624828609	0.0434858196209081
Gbp10	0.000153270883718479	0.00334473753625611	0.116394134354	0.0218901680359579
Gdpd1	0.636149509409557	0.669454202516964	0.275829829514771	0.498737449649201
Ghr	0.0386375007980416	0.0652497123306917	0.138876504254048	0.0874983839698297
Gipr	0.111703175561669	0.0434348698731951	0.160408951344412	0.27752536719194
Gjb6	0.00733063139979343	0.010829742661745	0.00160354878249831	0.0013652106136253
Glod5	0.00809115752824531	0.010829742661745	0.00293787799011241	0.0143772651684453
Glt1d1	0.0206321240713979	0.0141385125228816	0.0451062542192811	0.0643687782719188
Gm10062	0.00565543515784473	0.000837233775091364	0.0211720833374654	0.00744049876917183
Gm10701	0.263051569204002	0.25676069484439	0.465274743468115	0.272197857943439
Gm10863	0.774164823310422	0.635654820281137	1.33764660506382	1.15392682935435
Gm11110	0.032424367840784	0.0317379771773892	0.0638495128172989	0.0512167082140939
Gm11739	0.0423175492954428	0.0361908503833027	0.0130210112476361	0.0187666484419402
Gm12092	0.0626792343472694	0.0293007539361259	0.212349059051126	0.234304944013372
Gm12146	0.0884040473392051	0.0676009771711721	0.0198618798831371	0.0241152952330748
Gm12264	0.0237803653580758	0.0293007539361259	0.0113034568890919	0.0132993708016648
Gm12324	0.360534970748104	0.282662920845246	0.139807234332922	0.276351602819989
Gm12940	0.191124640729198	0.243389415406875	0.116751196302149	0.204615323943571
Gm13403	0.191884048267861	0.225835338656905	0.106103766192523	0.137623516082623
Gm14133	0.0108242723711805	0.00667832508674155	0.00133646915572758	0.00236518184323854
Gm14532	0.00641723589896841	0.0145513400371919	0.0561667620078304	0.026335482229689
Gm14762	0.00428272965559044	0.00167376717612451	0.0130210112476361	0.0129398143344194
Gm15417	0.0812223303458667	0.14006310692063	0.30424764477362	0.173864116896117
Gm15564	0.437053361564508	0.316492715009563	1.04444321833233	0.641574115612305
Gm15706	0.00778701648134303	0.00417917682815104	0.0153943038142533	0.0180513291502356
Gm15813	0.0793834175267467	0.0796618822077076	0.0274372744359861	0.0396416158696209
Gm15853	0.0361273097338417	0.0482352262523334	0.0177619771966008	0.0303194392913703
Gm15972	0.0254254970288394	0.0133123458625384	0.0341805601484716	0.0385029945149674
Gm16008	0.00535055229178419	0.00459613551091848	0.0168418813392024	0.0103291564438848
Gm16068	0.10689375395808	0.116860373923185	0.0451062542192811	0.0778557686343326
Gm16675	0.00702625892247961	0.00958612598504419	0.0508424781755002	0.01652957458254
Gm17135	0.0412885000889431	0.0640720034880976	0.257597977212529	0.208615383381569
Gm19412	0.00961047678152452	0.00875618815618156	0.0312035598550412	0.0126700621179966
Gm19684	0	0.00292725663662312	0.0207792025161469	0.0071692588119539
Gm1976	0.229990296621897	0.265148329978101	0.612522336199018	0.462811816060772
Gm20319	0.06870776194256	0.0908144747760171	0.0328873010222806	0.0399917002356508
Gm20632	0.00550300534400967	0.00125558794912177	0.01328498874192	0.00707882914128072
Gm20939	0.0343516087696905	0.0341692748006526	0.0864271856955463	0.0466201224064946
Gm2350	0.0248275804274451	0.0268575761221571	0.00600009520178534	0.0182302069490388
Gm26532	0.000919273120764033	0.00417917682815104	0.0231341754439592	0.0135689533369516
Gm26917	0.616981000994417	0.67245153764853	1.34436334501933	1.03355813403587
Gm28050	0.0111274912051397	0.0112439381062813	0.0304254913357768	0.0239374671476583
Gm30122	0.00885110569623134	0.0104153755882521	0.0274372744359861	0.0230478520686417
Gm31728	0.0396692802236952	0.0361908503833027	0.0134169513621159	0.0330547389599516
Gm32031	0.0362751425843561	0.0235906925910996	0.0818783164102192	0.0528594094832613
Gm33948	0.112525330331908	0.119093498687748	0.0308146012692347	0.125486492599002
Gm34006	0.00367203295444615	0.00250960137389276	0.0428025196225987	0.0647956792775161
Gm34907	0.00260241549249338	0	0.00852269922553442	0.0223355897469437
Gm34933	0.00504557644381231	0.00209177160235687	0.0118322494228597	0.0183196338508961
Gm35360	0	0.00125558794912177	0.0188124797386793	0.000364238440553857
Gm35438	0.0129448759672098	0.0153764841376583	0.00307121303922091	0.0200172272878805
Gm35438.1	0.466612462569045	0.432754855331584	0.178023780394124	0.46847178220434
Gm35835	0.00839520610149551	0.0145513400371919	0.00400406092400776	0.0061740823857486
Gm36037	0.00336654469048739	0.00292725663662312	0.0195996330702768	0.0156333418955487
Gm3604	0.0137011458889936	0.0104153755882521	0.0302957543714515	0.0269562522893178
Gm36356	0.0597956829352108	0.0613186102783264	0.0197307650733808	0.0239374671476583
Gm36569	0.0210824801034612	0.0100008367435087	0.00173706185132296	0.00499668651614135
Gm37459	0.626938786573398	0.604569970722042	0.314455417076032	0.221615630649973
Gm38642	0.0553096809473169	0.0341692748006526	0.199176511613123	0.283716563311776
Gm39214	0.100953194187596	0.10411093048424	0.0386938412501156	0.0374508074709997
Gm39469	0.176328256896325	0.193232826679375	0.335137671155949	0.23336782582493
Gm4013	0.0132474525726856	0.0116579620639779	0.0352139645837203	0.0210879086451945
Gm40841	0.0200313336895715	0.00875618815618156	0.0350848474163612	0.0457504677035466
Gm41148	0	0.000837233775091364	0.0471495723658958	0.0013652106136253
Gm41836	0.00260241549249338	0.00334473753625611	0.0167103699383224	0.0532912511667259
Gm43242	0.105791202271922	0.0858304118933204	0.0142083615954803	0.0437473870631959
Gm43376	0.182860547398553	0.155954692035753	0.064602014591871	0.065734220481823
Gm44767	0.00991406382872836	0.00750998848799739	0.0293871240281969	0.0244708565635317
Gm44866	0.342741667611668	0.447586644420018	0.127521928827474	0.0687996656402991
Gm45338	0.0727066839079297	0.0711175409802756	0.0139446277704778	0.0435730163705057
Gm45871	0.0762636868053316	0.0823652971683905	0.176679754913375	0.0939031610737009
Gm46519	0.000459742193262117	0.00417917682815104	0.0202551211973915	0.00508730466190345
Gm47181	0.00229660024814377	0.00250960137389276	0.0142083615954803	0.00608356267272915
Gm48091	0.0681351797168511	0.0522179953894759	0.00918548609483041	0.00834410098098876
Gm48342	0.0602287460766366	0.0644647272333581	0.0160525533800276	0.00816344584657752
Gm48370	0.161700914955056	0.112753314741341	0.0113034568890919	0.0331428499859634
Gm48371	0.267049741770157	0.17511903469976	0.049697862705832	0.129735228463985
Gm48693	0.00900302605185187	0.00626223386821858	0.0235261323112502	0.0217119437845729
Gm4876	0.196680283246468	0.0349783955118732	0.264807514152813	0.253713583498956
Gm49042	0.0467158052727105	0.0317379771773892	0.0021374941366676	0.00924688743291548
Gm49492	0.00168468904746881	0.00292725663662312	0.0346973958566808	0.019481456417688
Gm49519	0.129097526612348	0.0969147998074146	0.0266562688164577	0.0929077083353686
Gm49890	0.00351930048785166	0.00334473753625611	0.0305552114706056	0.0261580485529115
Gm49891	0.0138523312642616	0.0153764841376583	0.114845390959644	0.0784453755296796
Gm49969	0.123965082644569	0.0995720344048223	0.0433149194860593	0.049484628775463
Gm50020	0.0129448759672098	0.0166129250734579	0.0442109879626324	0.0250927848465698
Gm6525	0.0742733241633967	0.0542034472902945	0.0227420648862404	0.0311143296089556
Gm6999	0.00107240318220319	0.00125558794912177	0.0340513094732638	0.0225137028940404
Gm7160	0.0240796815843692	0.0264497988581464	0.0686058218005429	0.0413034261481105
Gm9828	0.0234809595147545	0.0203131015422689	0.0401081043395795	0.027488034372523
Gnai1	2.05641061846422	1.6602019010718	1.0779471841367	1.39105421911954
Gnaz	0.029898512300053	0.0268575761221571	0.090833339962293	0.0497446320248883
Gpc6	0.0121880336683324	0.0162009479366463	0.0580614427358788	0.0153643153841076
Gpnmb	0.00290813724247059	0.000837233775091364	0.0359883176875321	0.0128499050138426
Gpr143	0.00199069145222025	0.000418704507592392	0.0461284351861287	0.0330547389599516
Gpr173	0.0287076631905885	0.0349783955118732	0.0706017299795077	0.0512167082140939
Gpr50	0.00611258523982493	0.0133123458625384	0.000668457846572702	0.00127425453474319
Gpr85	0.172465705401721	0.163095490336811	0.0657297065823539	0.0702439769853115
Greb1	0.00991406382872836	0.0116579620639779	0.19324138700411	0.0746489654168682
Grik1	1.03360701315305	1.84005482038377	0.834557687930885	1.04027459269923
Grk5	0.120574051750404	0.0904319660096076	0.178695116339216	0.149536573647105
Grm3	1.98270510112652	1.62388384903956	0.804205724646111	1.22402822290147
Grn	0.25797205603966	0.246994417437811	0.412510266997592	0.321203328287843
Gsdma	0.000153270883718479	0.00292725663662312	0.0297766381318117	0.0113202084612219
Gstm5	1.50398755549419	1.30786730417324	0.696258157335913	0.731614357542739
Gstm6	0.0751268218570795	0.0781137859636409	0.0324989969180817	0.0251816001774758
Gstm7	1.03926169252151	0.859471527487282	0.505036655640852	0.693246567073481
H2-Aa	0	0.00250960137389276	0.0279576061826218	0.0139282837049686
H2-Ab1	0.00183770195452845	0.00167376717612451	0.0950985684116028	0.0190347613134162
H2-DMa	0.0409942914254474	0.0442365312148707	0.0823710848282165	0.0511301754575062
H2-DMb1	0.000306518279073199	0.000837233775091364	0.00984783396863667	0.00145615842025154
H2-Eb1	0.000612942633479883	0.000837233775091364	0.0241790525494886	0.0087053133704482
H2-Q6	0.000153270883718479	0.00125558794912177	0.0413920647011343	0.0101488595965376
H6pd	0.00199069145222025	0.00626223386821858	0.0301660005732622	0.0148260451380312
Hexb	1.3589188955273	1.09264229421394	2.5662155317292	1.6946762065881
Hist1h1c	0.257735170507184	0.187347033628201	0.663806919945176	0.250244876988769
Hist1h4i	0.00244951956068899	0.00292725663662312	0.0118322494228597	0.00590249866152578
Hivep1	0.0316821312007983	0.0341692748006526	0.0763178749760233	0.0385029945149674
Hmgb3	0.0623912530875602	0.036998337707639	0.0691051724366397	0.0450541989949427
Hmgcr	0.89040043729599	1.05208836961661	0.490812131264201	0.333284245092238
Hmgcs1	2.28456524373132	2.4182758221404	1.66460247866807	0.889608652634468
Hnmt	0.0275153942685721	0.036594675549941	0.0114356812393638	0.0107797563955949
Hpcal1	0.0741310036985724	0.0683835051770883	0.179366001894704	0.196566881239802
Hps1	0.0569037926029061	0.045037550410389	0.0831097824652936	0.0924926437221962
Hrh2	0.00611258523982493	0.0137255145116264	0.052366596979133	0.0113202084612219
Hsd17b10	0.526134428400579	0.539830386968605	0.252831822002163	0.258577777517424
Hspa2	0.206329001620458	0.241088538139234	0.520016224867099	0.359562874413014
Hspb2	0.0109758932808678	0.0104153755882521	0.0335341396502575	0.0149157769685936
Hspb8	0.00458793820665579	0.0120718146767755	0.159725222073872	0.0837362521267166
Htatip2	0.00656952643109844	0.00958612598504419	0.0436990471563805	0.0282851776376519
Hunk	0.0906465475533743	0.0462378774275208	0.189264976647993	0.13173310061223
I730030J21Rik	0.029898512300053	0.0557889754319729	0.0144720258832913	0.027222178679943
Idi1	1.14889148150429	1.39375679710684	0.750678253490809	0.330539471365672
Ifitm2	0.000766119606917842	0.00376204421831753	0.0226113271927364	0.00318259701613135
Ifngr2	0.0315336177400672	0.0333594988829297	0.0676063718520322	0.0500045676901956
Igdcc4	0.00336654469048739	0.00292725663662312	0.0138127347700657	0.0185878665834531
Igf2bp3	0.0799495971110437	0.103355877026829	0.0448505456356621	0.0445316791352684
Igf2r	0.177098980100426	0.201141215783716	0.416309897500164	0.328115198750227
Ikbkg	0.122745635798152	0.139334726811546	0.297417222342427	0.166874474683062
Il10rb	0.00183770195452845	0.00125558794912177	0.00998025091510072	0.00590249866152578
Il17b	0.0168712486906184	0.0211335069735566	0.0481696678881078	0.0346395508241961
Il18bp	0.0155138635753226	0.0361908503833027	0.187159923451253	0.0479231880419252
Il3ra	0.000766119606917842	0.000837233775091364	0.0215648098640616	0.012759987608853
Il4	0.0284097291997118	0.0276726321420624	0.00958294746135343	0.0150055007480771
Inppl1	0.0917659146726909	0.137146397838435	0.242916183214596	0.160146076181645
Iqank1	0.00580784174037275	0.00334473753625611	0.0245706001640373	0.0216228197460086
Iqck	0.039521948324558	0.0264497988581464	0.0552813476516713	0.0636853573677642
Isoc2b	0.0258736999845498	0.0256337451439472	0.0444668601180184	0.0345515715811878
Itga10	0.00748278290452147	0.0133123458625384	0.00440358663903462	0.00906639533262787
Itga4	0.227185210252209	0.155596310094826	0.0337927579948385	0.0877486902333637
Itga8	0.0153629292098107	0.0321436041703202	0.213538003714869	0.0916619973021435
Itih3	0.427402886252123	0.426213217742579	0.0480422128408524	0.0904147325372383
Itpkb	0.0420236432758895	0.0474367653868719	0.118415801720038	0.0343755898707239
Itpr1	0.11539756065401	0.157029067876657	0.392299254840678	0.155713140551837
Itpr2	0.151477882396399	0.11088087886894	0.287835740327329	0.197090507358968
Itpripl2	0.00107240318220319	0.00250960137389276	0.100676772204239	0.0624026829248278
Jarid2	1.13966578183286	0.997540203644562	1.91546736273226	1.20483108587775
Jazf1	0.0487617232678171	0.0374018369879446	0.0935164635820105	0.0635144291380092
Junos	0.0210824801034612	0.0178478391107953	0.0623428083578679	0.0537229064434461
Kcna2	0.0576275495978376	0.0522179953894759	0.138177887771482	0.0860787971407654
Kcnd2	0.0167205190776134	0.0329543648898555	0.194343145097121	0.0962220377588898
Kcnma1	0.161440087225128	0.170891918767719	1.04970011280635	0.772904556250763
Kctd13	1.81017483940615	1.69093298252302	1.07311149730468	1.35832317505504
Kctd15	0.018377296569641	0.0239996371632177	0.0875305456792769	0.0695645609030088
Kdr	0.0319790919698901	0.0264497988581464	0.00160354878249831	0.00472478279854478
Khdrbs3	0.297106693303243	0.147679236931772	0.381033990388337	0.31384417127948
Kif9	0.0260230563395909	0.0426325653549684	0.0941252616951786	0.0546718926928889
Kirrel3	0.466324039754894	0.689198728809224	1.20295824130455	0.872514101480519
Klc2	0.029898512300053	0.0272651871716469	0.0541418046104175	0.045663460622316
Klc3	0.00229660024814377	0.00292725663662312	0.0169733754471081	0.00644559237227767
Klf10	0.0162681938741395	0.0157888010047194	0.0390797477689232	0.024826291515063
Klf2	0.000612942633479883	0.000418704507592392	0.0126249143024845	0.00399934456714639
Klf4	0.012490839328582	0.0235906925910996	0.125164661252779	0.0894157994311821
Klf6	0.273133840368062	0.306987287447624	0.544675087822839	0.428992934652397
Lacc1	0.00321376555522446	0.00334473753625611	0.0199929775040538	0.0103291564438848
Lama2	0.191884048267861	0.293650941181695	0.0742091910530174	0.109452225050883
Lama5	0.00107240318220319	0.00167376717612451	0.0169733754471081	0.0271335444069296
Large1	0.273017186872998	0.385184045408312	0.786334525771322	0.518887259679476
Lars2	1.24229650976587	1.3273794199205	2.428579774913	1.86358572849425
Lbp	0.00122550979841676	0.000837233775091364	0.0386938412501156	0.0252704076209194
Lcn2	0.000153270883718479	0.00292725663662312	0.0701031262776535	0.011410255414826
Lcp1	0.0632549481864226	0.0490330500866519	0.188157606304919	0.181261210959847
Ldhb	1.30573938583154	0.958003256839709	0.501479200032013	0.627814634650816
Lgals1	0.00854719572807053	0.00875618815618156	0.103454248694079	0.0228698340435974
Lix1l	0.0347958297026322	0.0325490666967036	0.0724692828403821	0.047575869863536
Lmo4	0.12111739002645	0.14006310692063	0.29682106180716	0.183916888754674
Lncpint	0.735913034649276	0.668596168330352	1.3888584562059	1.10277385063094
Lpp	0.0127935533253192	0.0297073705370852	0.112458015265102	0.0482703856322787
Lrat	0.00672179377435369	0.00542953167499542	0.000668457846572702	0.00662655808434763
Lrfn2	0.000306518279073199	0.00334473753625611	0.0308146012692347	0.00309180609696944
Lrfn4	0.0182267938088654	0.010829742661745	0.029646816954459	0.0498312847542687
Lrmda	0.989975025184991	0.786860289558166	1.32521417058424	1.25149898219727
Lrrc27	0.0138523312642616	0.014963997195271	0.041135404479294	0.0428752293892142
Lrrc4b	0.631432479787918	0.409669418569956	0.714489235232627	0.837343690300706
Lrrc69	0.0117336531873884	0.0133123458625384	0.0291273636440001	0.0265128844293419
Lrriq1	0.00321376555522446	0.00376204421831753	0.0533813871882771	0.0380647177818853
Lrrn2	0.00763491126269086	0.00584596944572232	0.0513507759246399	0.0335832887003379
Ltbp3	0.0135499376532518	0.0199026462890986	0.050461085238711	0.0414781930056357
Luzp2	1.02390904904314	0.900635182390788	0.412333188145644	0.924138816565496
Ly6g6f	0.19542034474924	0.143697070592641	0.04523408399519	0.114500759661161
Lynx1	0.00474050755719733	0.00958612598504419	0.0314627815550079	0.0105995407790167
Lyz2	0.00122550979841676	0.00292725663662312	0.0981340604127258	0.0296123392869698
Maf	0.00748278290452147	0.00167376717612451	0.0139446277704778	0.0174250047556876
Majin	0.00107240318220319	0.00376204421831753	0.0476597502013554	0.0184090527562977
Mal	3.74987296602582	3.74968638861396	2.8264371019644	2.87045214421632
Maml2	0.37443971534016	0.417423930429459	1.18287798127177	0.652684113243467
Maml3	0.427302910210298	0.571542324381431	1.19614779155946	0.638212092662365
Man1c1	0.0995665961213497	0.106749137021953	0.241971688323966	0.197090507358968
Mansc1	0.00656952643109844	0.00250960137389276	0.0224805724046531	0.0108698520262214
Map3k1	0.0273662606540622	0.0260418552440025	0.0632219951567155	0.0423515694348228
Map3k5	0.145929575586952	0.140427098120139	0.278870145349509	0.3760183732175
Masp1	0.430696500808756	0.514117067046013	0.124574475098612	0.320476455243846
Mcc	0.00504557644381231	0.012899006434555	0.0498251069201615	0.0117703621666011
Me3	0.00290813724247059	0.00501292041160023	0.0402365745860792	0.0105094207901385
Megf6	0.00474050755719733	0.00376204421831753	0.0476597502013554	0.115393811319559
Meiob	0.00137859297658287	0.00209177160235687	0.01328498874192	0.00572140186020905
Mest	0.200199689167989	0.203877364787392	0.0666059220038891	0.0696495131616745
Met	0.00275528805070549	0.00542953167499542	0.0297766381318117	0.0212662441395647
Mfhas1	0.0380474342326255	0.0357868620760167	0.0838479348309377	0.0552753244759201
Mfsd7a	0.0290055084432398	0.0374018369879446	0.101402075347761	0.125807782454579
Mgll	0.457438437489002	0.394542313609587	0.159839209421514	0.322787401568178
Mgp	0.000766119606917842	0.00542953167499542	0.15869875083246	0.0380647177818853
Mgst1	0.00504557644381231	0.00750998848799739	0.0348265630571491	0.00861502250432102
Mill2	0.000459742193262117	0.00292725663662312	0.049697862705832	0.00771166517522494
Mir22hg	0.0254254970288394	0.0414279003614992	0.0911996446487334	0.0479231880419252
Mmp11	0.0100658227974131	0.00250960137389276	0.018943714996637	0.0568253362416958
Mmp15	0.169494279167922	0.133854899126261	0.0343097941201012	0.0760848592565646
Mmp17	0.00168468904746881	0.00626223386821858	0.0604562297509242	0.0231368491986676
Mmp2	0.0330177607487913	0.0219532398914686	0.0531277861633335	0.0413908133948049
Mnt	0.0633988248726106	0.0621060679459227	0.119484443845479	0.11010508285209
Mocos	0.00122550979841676	0.00667832508674155	0.0687306828381742	0.0213553999618368
Morc4	0.0586399301720649	0.0624995643681365	0.130108521252612	0.049484628775463
Mpeg1	0.000766119606917842	0.00250960137389276	0.0551547958655941	0.0041807534678947
Mrgpre	0.0173233012610597	0.0141385125228816	0.0304254913357768	0.0287277605893902
Mroh3	0.0132474525726856	0.0244084145680326	0.0944903627375998	0.0258918389936957
Mroh7	0.00458793820665579	0.00292725663662312	0.0249619945290541	0.0668422710814505
Ms4a6c	0.00153165272387637	0.00292725663662312	0.01473562067057	0.00263772781511815
Msi1	0.00306096307493068	0.00792556095834617	0.0389511288090379	0.0137486346607492
Msmo1	1.66751145230664	1.7970434844265	1.05572088059724	0.513070229376379
Msrb3	0.0902264616379478	0.0808213836469235	0.148375668258473	0.111409521174214
Mvd	0.234486381210662	0.27027520020704	0.116036944867075	0.0577713842802935
Mxd3	0.00122550979841676	0.000418704507592392	0.0219573822170792	0.0153643153841076
Myh6	0.131250699704835	0.140427098120139	0.0508424781755002	0.092160467946405
Mylip	0.0775411168763878	0.106372676236739	0.227270057197959	0.174476261056139
Myo1c	0.00900302605185187	0.0186702687193499	0.05932257181392	0.0257143265752152
Nap1l5	0.971522404255841	0.972360274174694	1.59598451814741	0.907813004613665
Nat14	0.0192798377715903	0.019492022493232	0.037921581153418	0.0190347613134162
Nckap5	0.224494701262612	0.178978256380074	0.470050260321647	0.622794963953829
Ndnf	0.0306420734961728	0.051820431528328	0.0976490004616299	0.0631724850041423
Neat1	1.81831798386014	1.96288105035923	2.87806045974413	2.32045432209026
Nebl	0.0778247687555176	0.0621060679459227	0.409318040119222	0.241126587213917
Nectin2	0.00351930048785166	0.00542953167499542	0.0215648098640616	0.0167982878330296
Neil2	0.0120365964470396	0.00834096079995411	0.0248315467610359	0.0357825771689445
Neu3	0.0130961757140229	0.00875618815618156	0.0198618798831371	0.0182302069490388
Nfatc1	0.00122550979841676	0.00125558794912177	0.0128889963643505	0.0041807534678947
Nme5	0.00397742792382517	0.00334473753625611	0.0185499575433812	0.0102390120835803
Nmnat3	0.0714230592599538	0.0660340817097202	0.171172825799995	0.220155117268572
Nol3	0.0656980410311563	0.0676009771711721	0.261827009621784	0.272960670593693
Nos1	0.00107240318220319	0	0.00878786668995329	0.0042714455788152
Nova2	0.00885110569623134	0.0104153755882521	0.0249619945290541	0.0167087247722725
Npb	0.243177998028159	0.273784737873289	0.122210241105518	0.302803811843707
Nppc	0.150291548255522	0.122063262166924	0.00546820883500981	0.0539818102011664
Nr1d1	0.0129448759672098	0.00501292041160023	0.0209101799412617	0.0126700621179966
Nradd	0.0155138635753226	0.0276726321420624	0.0620914700902372	0.0278423987195099
Nrxn3	0.0239300346699979	0.0581625640244486	0.169706699284842	0.0796235474352276
Nsdhl	0.392718138852655	0.575554300350245	0.228547821659116	0.1691072513511
Nt5dc1	0.1428781216596	0.123174653627703	0.258217978248158	0.234232889168998
Ntsr2	0.0231814640007256	0.0337644688089185	0.00506910832243567	0.0134791005665856
Numbl	0.029898512300053	0.0252254684220357	0.0632219951567155	0.0498312847542687
Nupr1l	0.0115821471351287	0.00334473753625611	0.0185499575433812	0.0198386688904091
Oaz3	0.0186782341549897	0.0219532398914686	0.00865529174696685	0.011140090225001
Olfr56	0.000612942633479883	0.00459613551091848	0.11066373569904	0.0206419307190969
Olfr920	0.00214365754770589	0.00626223386821858	0.0339220420901595	0.0166191536892551
Omg	1.09411649394247	0.985576701525885	0.479119369420634	0.594852736773011
Orai2	0.0137011458889936	0.0124854960864383	0.0269166718032671	0.0140180961258604
Osbpl3	0.00778701648134303	0.0199026462890986	0.0559138664631533	0.0292586016999346
Osbpl5	0.0582061782767809	0.0386113588776013	0.0903447248971326	0.0862459119903498
Pacs1	0.063111050796755	0.0402217823997675	0.0885102891346899	0.114906791104584
Pafah2	0.099705342479411	0.0672094834170742	0.131985485980681	0.154231117690405
Pald1	0.098178072730946	0.116860373923185	0.290039619273382	0.239980932699629
Pappa	0.00336654469048739	0.00292725663662312	0.041776931561517	0.0420896365893092
Paqr7	0.177997407046185	0.165937593085375	0.0433149194860593	0.0565671677327476
Pbxip1	0.112662290434713	0.155596310094826	0.265525617312206	0.187169953166666
Pcdh1	0.0937217971946921	0.0938692890301891	0.251064652048318	0.117258527940567
Pcdhb21	0.0161173733286446	0.0252254684220357	0.0543951486421353	0.0539818102011664
Pde10a	0.0355357596892945	0.0248170249421569	0.062468453806555	0.0789504763259561
Pdia5	0.0270679266859487	0.0317379771773892	0.0730910262076171	0.0620603583593569
Pdlim7	0.00397742792382517	0.00501292041160023	0.015130882618111	0.019749377734087
Pdzrn4	0.283923563676152	0.143334267906011	0.819997647940259	0.259069927129531
Pgghg	0.000306518279073199	0.00167376717612451	0.0159209381257086	0.00309180609696944
Phf1	0.0752690006772132	0.0506267907221007	0.0925416150221568	0.0845735054310212
Phf11d	0.000306518279073199	0.00417917682815104	0.0292572522705306	0.0024560387542602
Pid1	0.0251265834161744	0.019492022493232	0.0780511056490694	0.0311143296089556
Pih1d2	0.00367203295444615	0.00501292041160023	0.0171048522665866	0.00698839129234264
Pipox	0.0248275804274451	0.0361908503833027	0.0749539402798064	0.0420023103921822
Pir	0.0667022881623954	0.0325490666967036	0.112338496735793	0.101255335160733
Pknox2	0.00733063139979343	0.00667832508674155	0.0521127384390441	0.011140090225001
Plcb3	0.0097622818257633	0.00584596944572232	0.0291273636440001	0.0160815586431696
Plcg2	0.00748278290452147	0.00626223386821858	0.0408786783660722	0.0581151799671427
Plekha6	0.00596022509867385	0.00792556095834617	0.040750290589619	0.0356068119786929
Plekha7	0.0230316826004077	0.0133123458625384	0.0594485972912713	0.0569974115601065
Plekhg5	0.00244951956068899	0.00209177160235687	0.0156576556379428	0.012400237115681
Plin2	0.0218326230708719	0.0223628545022831	0.0766895345275198	0.0536365902929175
Plp1	5.83182593821862	5.83177866056014	5.08360355951998	5.56182233773086
Plpp1	0.181455226746804	0.21643557174161	0.0878980619721949	0.129735228463985
Plppr5	0.0858752089604202	0.0569764739683962	0.0153943038142533	0.0228698340435974
Pls1	1.50616539776868	1.1152748592594	0.647212662793151	1.26354160507991
Plxna1	0.0461304876325134	0.0378051735222467	0.114129776514793	0.112386734479923
Plxna4	0.00351930048785166	0.0133123458625384	0.148836741921601	0.1691072513511
Plxnb2	0.00489305363388297	0.00750998848799739	0.0519857849983497	0.0163503922922661
Plxnd1	0.00321376555522446	0.00167376717612451	0.010377396581501	0.0110500189394624
Pmepa1	0.219584243479809	0.26160829730701	0.703100717767978	0.385478347137313
Pmp22	1.73379329404672	1.94752925222061	1.24047928742856	1.4010878271245
Pmvk	0.471502965355004	0.62158366817688	0.304642184214853	0.257451953758249
Podxl2	0.0330177607487913	0.0199026462890986	0.0787930001613444	0.0985355496927959
Poln	0.0246780454003509	0.0174363705209455	0.0477872540016196	0.0624026829248278
Ppara	0.00580784174037275	0.00417917682815104	0.0223498005175192	0.0223355897469437
Ppfibp1	0.0367185100538032	0.0442365312148707	0.128345661457036	0.108063485409823
Ppid	0.512455442802485	0.514868133746197	0.269925545068684	0.404863295920937
Ppl	0.00214365754770589	0.00626223386821858	0.15148379783952	0.0645395605441162
Ppp1r14b	0.0500747493561577	0.0374018369879446	0.102006093037991	0.0995254186798385
Pqlc3	0.0156647751630896	0.019492022493232	0.151368854035707	0.15094725237555
Pradc1	0.277440481042567	0.253190791511366	0.0689803581523316	0.108145229385546
Pram1	0.0437857850766287	0.047037295749401	0.0210411402135372	0.0326140673389627
Prlr	0.00809115752824531	0.0211335069735566	0.00427042913554905	0.00725968030584115
Prob1	0.052259302226618	0.0605305320324406	0.115560493666645	0.111328043610491
Prss36	0.0515316480600476	0.0553928290123451	0.0258746527503583	0.0569974115601065
Prxl2a	0.878118612085608	0.754895189634582	0.376363610956609	0.543146364101342
Psap	1.50057515315458	1.55014934147271	2.09002035493397	1.81300956045398
Psat1	1.54277593647751	1.61484438504731	0.915482357353658	1.09862337561556
Psg16	0.0361273097338417	0.0664260358065664	0.028217670561724	0.019302802319648
Ptms	0.310118286952606	0.280767077380598	0.502126952170615	0.440080688288451
Ptn	2.13140484714174	1.96944736270074	0.970731209661078	1.11258144401222
Ptprb	0.0071784567414621	0.00958612598504419	0.000534802019350572	0.00191077342218943
Ptprg	0.0446656929143719	0.0458379284876695	0.113771777161693	0.067353265242419
Ptprn	0.0737039207330382	0.0438357808766441	0.0915658152051815	0.119685553092328
Ptprs	0.219584243479809	0.27027520020704	0.537044080467938	0.549001948538993
Pycard	0.0100658227974131	0.0178478391107953	0.0494433256935991	0.0211770803678231
Rab32	0.00824319337056223	0.00958612598504419	0.0433149194860593	0.0283737098997602
Rab33a	0.311129477956063	0.271552821266763	0.0997088822972864	0.0758316159983658
Rab34	0.00580784174037275	0.0112439381062813	0.0274372744359861	0.0103291564438848
Rab3a	0.396230939647038	0.338227325318932	0.126343989628768	0.205357283873875
Rab3d	0.00244951956068899	0.00376204421831753	0.0157893055465343	0.00762128454309659
Racgap1	0.0251265834161744	0.0474367653868719	0.0211720833374654	0.0281966375368882
Ralgps1	0.961434500105391	1.05980949413872	1.52262991424379	1.34029607726265
Ramp2	0.0132474525726856	0.0272651871716469	0.238395524102541	0.0711774210215955
Rap1gap	0.0367185100538032	0.0482352262523334	0.0837249472685763	0.0266015737287363
Raph1	0.14208055646675	0.111630273992296	0.218602176663784	0.196566881239802
Rapsn	0.0188286689931898	0.0133123458625384	0.0489340572193666	0.080212113263133
Rarg	0.00183770195452845	0.00209177160235687	0.010377396581501	0.0087053133704482
Rassf3	0.0616709368963988	0.0313321855844323	0.0753261070021381	0.134204931504895
Rbfox1	0.00839520610149551	0.0219532398914686	0.160978368846278	0.0367487338837033
Rbl1	0.00428272965559044	0.0104153755882521	0.0406218863276281	0.0152746237944978
Rbms3	0.134337786220933	0.156312945585077	0.530771224573068	0.486270554185825
Rcn1	0.00519807599408168	0.00626223386821858	0.0477872540016196	0.0156333418955487
Rell1	0.469587970668538	0.46772607472485	0.817638795150839	0.562896271673688
Reln	0.00290813724247059	0.00334473753625611	0.0291273636440001	0.00572140186020905
Renbp	0.00839520610149551	0.00417917682815104	0.0222190115268623	0.0268675944419329
Rgl3	0.018377296569641	0.0070942432453686	0.0216956844394868	0.0353431062546082
Rgs12	0.0177751495723071	0.00958612598504419	0.0350848474163612	0.031820368727751
Rgs16	0.0340553518141508	0.0223628545022831	0.0763178749760233	0.0704986390554704
Rhbdf1	0.0112790661509645	0.012899006434555	0.0262655371488654	0.0210879086451945
Rhobtb1	0.00336654469048739	0.00250960137389276	0.0287375965073874	0.019749377734087
Rhobtb3	0.934707480500364	1.00185532517658	0.578911681350471	0.70645475672907
Rhoc	0.204956300061942	0.213056983781785	0.399679758368191	0.312045887244529
Rnase4	0.00306096307493068	0.00292725663662312	0.0556609069461409	0.149458144226947
Rnf128	0.00367203295444615	0.00167376717612451	0.0142083615954803	0.00834410098098876
Rnf144b	0.0224323325535984	0.0124854960864383	0.0531277861633335	0.0587165381578525
Rnf182	0.00290813724247059	0.00875618815618156	0.0735881427246268	0.0190347613134162
Rragd	0.00351930048785166	0.00501292041160023	0.0306849147803036	0.0231368491986676
Rras	0.0222824388968713	0.0227723013976646	0.0774324394945579	0.0438345610089393
Rras2	0.0505120418787598	0.0765632894011894	0.273289152825412	0.175852216880128
Rsad1	0.0261723903906423	0.019492022493232	0.0448505456356621	0.048617462718303
Rsph9	0.0355357596892945	0.0207233883910443	0.042546221199616	0.0185878665834531
Rusc1	0.00321376555522446	0.00459613551091848	0.0243095854561386	0.0176039946150833
Rxrg	0.000612942633479883	0.00167376717612451	0.0245706001640373	0.0115002942607062
S100a1	0.861871558082103	0.666662895354535	1.39699562904778	1.72803576054184
S100a11	0.00153165272387637	0.00542953167499542	0.0438270569303576	0.019481456417688
S100a4	0.00474050755719733	0.00584596944572232	0.118178170526451	0.0173354978105423
S100a6	0.528847914247598	0.454522189409877	1.41564218448719	0.612136352463678
Saa3	0.00199069145222025	0.00209177160235687	0.0752020668171766	0.00599303476514948
Samd5	0.00244951956068899	0.00209177160235687	0.0178933503809085	0.00508730466190345
Sass6	0.5673009138619	0.842303168751945	0.469883083815006	0.583890438532435
Sc5d	1.2524238936328	1.47849825314594	0.955056350146403	0.5539863975984
Sccpdh	1.62767718077268	1.52166308596068	1.01206493570294	1.46106055163305
Scg3	0.414827769306052	0.565137093595909	0.228547821659116	0.110023498932222
Scml4	0.0200313336895715	0.0186702687193499	0.166088588135955	0.0898321428340325
Scn1b	0.0071784567414621	0.0100008367435087	0.0975276987019445	0.130614784000386
Scn2a	0.104549376841123	0.0865988095209412	0.158128033424636	0.194619580176805
Scrn2	0.0420236432758895	0.0337644688089185	0.0101126503296386	0.0217119437845729
Scube3	0.0182267938088654	0.0203131015422689	0.0888774455983174	0.144110461107996
Sdk1	0.0236306736418975	0.0361908503833027	0.534226163693571	0.201418608310495
Sdr39u1	0.017021955587631	0.0162009479366463	0.037921581153418	0.0285507509135615
Sel1l3	0.104963490022847	0.0418296166273151	0.108506341899073	0.169645451362194
Sema3f	0.000153270883718479	0.00167376717612451	0.0321105419752322	0.00445280512920836
Serhl	0.00489305363388297	0.00459613551091848	0.0274372744359861	0.0133892397219737
Serpinb9	0.000919273120764033	0.00209177160235687	0.0293871240281969	0.0054496951507854
Serpind1	0.503601662080699	0.328625770623367	0.137828396420544	0.170644197834112
Sfxn1	0.0246780454003509	0.0223628545022831	0.129286240065657	0.0878321117335385
Sfxn3	0.0164189916762276	0.0116579620639779	0.0270468478724422	0.026424187263458
Sgpl1	0.157912238072709	0.157029067876657	0.283916887023379	0.253077375498733
Sh2b2	0.0161173733286446	0.0374018369879446	0.117702738666403	0.0459244591586041
Shc1	0.0508034640273084	0.0581625640244486	0.120670486142262	0.0799599131817883
Shroom4	0.0648364543523014	0.0546000650660639	0.194783508675007	0.117258527940567
Sipa1l1	0.102752902079698	0.0957738199197468	0.153550530240548	0.1489089659854
Six4	0.00733063139979343	0.00376204421831753	0.0190749330341616	0.0102390120835803
Skil	0.141947567068629	0.122804327033933	0.24207667626436	0.228161671575621
Slain1os	0.182477473948627	0.133121981353795	0.0498251069201615	0.0774344079117569
Slc12a4	0.0793834175267467	0.0911968372854131	0.198957319201475	0.120331766200317
Slc1a2	0.118806160740762	0.141154683291339	0.0451062542192811	0.0681192672265061
Slc25a24	0.000766119606917842	0.00167376717612451	0.0207792025161469	0.0141079004812057
Slc25a27	1.50354460113187	1.28704232218384	0.809100554437085	1.08539102778539
Slc26a1	0.0234809595147545	0.0268575761221571	0.00931799077061739	0.0157230013183738
Slc27a6	0.00153165272387637	0.00292725663662312	0.025353235764454	0.0141976967724529
Slc30a2	0.0133987065501217	0.00417917682815104	0.0182873664120825	0.00390862777433356
Slc35d2	0.0129448759672098	0.0120718146767755	0.0386938412501156	0.0389410792457019
Slc41a2	0.0502205347785851	0.0679923177178882	0.146760234238517	0.0854100583286072
Slc41a3	0.021232553720855	0.0145513400371919	0.0543951486421353	0.0594033621386684
Slc4a11	0.00336654469048739	0.00792556095834617	0.0323695287027684	0.0126700621179966
Slc5a11	0.365226863134272	0.44731892968068	0.228122081555413	0.0856608877936955
Slc7a10	0.00854719572807053	0.0174363705209455	0.00106931817837311	0.00109231755419106
Slc8b1	0.054439093226503	0.0777263871434925	0.151253897018296	0.102735742563464
Slit2	0.0414355719675296	0.0235906925910996	0.147106618426956	0.157970949310086
Smad3	0.0325727490818451	0.0605305320324406	0.194343145097121	0.182020695972579
Smim23	0.00961047678152452	0.0207233883910443	0.0014700178855538	0.00626459390569124
Smoc1	0.130712840915188	0.136415889377927	0.282102992734456	0.238762234922771
Smpd3	0.0593624321688441	0.07189732308006	0.177015930671916	0.0924096101221206
Smtn	0.0218326230708719	0.0329543648898555	0.0780511056490694	0.0521680746615911
Smtnl2	0.0934426195096282	0.0976747304653599	0.0319810234543236	0.0474021655276457
Snca	0.367670709984361	0.46693873907198	0.731364639981297	0.313111927365402
Snhg11	0.0778247687555176	0.109004930402308	0.0178933503809085	0.0866635769728758
Snhg18	0.0141546334610177	0.0120718146767755	0.0443389322241453	0.0278423987195099
Sntb2	0.0321275392913447	0.0534097395095953	0.115798747642578	0.0839875017304986
Sox11	0.00748278290452147	0.0182591384638778	0.230673807594877	0.186943338263715
Sox13	0.0879830181254035	0.051820431528328	0.137944907109628	0.0699043266449356
Sparcl1	0.153188995320808	0.12908130347646	0.0220882054282077	0.0580292421256212
Spock3	2.52574325387559	2.08836717610122	1.25792678257907	1.87328637775939
Spon1	0.0071784567414621	0.0178478391107953	0.10176452974062	0.0912464152087011
Spsb1	0.463724484127997	0.552925231581359	0.863338869922265	0.686897286436666
Spsb2	0.0301960031277787	0.0162009479366463	0.0365042201668392	0.0466201224064946
St3gal1	0.033166053974121	0.0305201080637147	0.195443690655035	0.146709232073701
St3gal3	0.711306511679513	1.03095349277944	1.52245486159954	1.24220652859196
St3gal5	0.552502558516151	0.417148016540212	0.810409735280205	0.654010950488803
St8sia3os	0.206079559633359	0.181775637842824	0.100555837185319	0.206024577455471
Stard10	0.029898512300053	0.0410260226548694	0.088999801135887	0.0777715106922092
Stat5b	0.206079559633359	0.181775637842824	0.40352835985977	0.335240195458707
Stmn1	2.17338532023621	1.86026707924699	1.05315831816958	1.64840930705207
Stmn3	0.0224323325535984	0.0239996371632177	0.0609596654901516	0.0177829524428426
Stmn4	2.60558418043079	2.21942571782985	1.52943317510811	2.2976790384707
Stmnd1	0.00428272965559044	0.00334473753625611	0.0354721489154698	0.00969797520894609
Stpg2	0.0287076631905885	0.0133123458625384	0.046639134116149	0.0781084998726707
Stx3	0.0207822652854971	0.0382083474417752	0.138061404225553	0.123878493087011
Stxbp1	0.156995575274775	0.169832341917226	0.404956625028037	0.214365144902634
Syne1	0.210684194368597	0.158459775800227	0.365380477028608	0.25378424829801
Syngap1	0.00290813724247059	0.00334473753625611	0.0266562688164577	0.0139282837049686
Syt9	0.243658657710129	0.215423193373385	0.434488397140078	0.348504433282314
Taco1	0.210435836521813	0.21643557174161	0.350608888339568	0.293271764647201
Taf7	0.365014072193461	0.373722008083654	0.183604523550685	0.216127671747783
Tcf7l1	0.0596512868683318	0.0293007539361259	0.0915658152051815	0.0483571661977977
Tenm4	0.713261414747798	0.668596168330352	1.12831073319589	0.825765364517044
Tent5a	0.156864554826017	0.182822641706845	0.356618632699806	0.171104821526417
Tfap2a	0.000306518279073199	0.00209177160235687	0.0209101799412617	0.0024560387542602
Tfap4	0.0304934054810315	0.019492022493232	0.0383077857499721	0.0506108216127147
Tgtp1	0	0.00334473753625611	0.143173887719665	0.0087053133704482
Them6	0.0346477779830401	0.0297073705370852	0.0723448877656944	0.0299659517879707
Tle6	0.0405528160688773	0.0199026462890986	0.0604562297509242	0.074395358220896
Tln2	1.05816676461	1.06905434857969	0.702372188011726	1.1921385441191
Tm7sf2	0.0704235441414368	0.104488243530859	0.0354721489154698	0.0334952164749969
Tmco4	0.0218326230708719	0.0239996371632177	0.087653066118443	0.0723641819223055
Tmem131l	0.0150609921180419	0.00875618815618156	0.0192061338557719	0.0242041974186282
Tmem200a	0.00428272965559044	0.000837233775091364	0.0213030093175369	0.00300100693406808
Tmem202	0.0109758932808678	0.0186702687193499	0.0402365745860792	0.031820368727751
Tmem8	0.0188286689931898	0.0166129250734579	0.0429306442049678	0.026246769326639
Tmem97	0.412395145765092	0.322880920759708	0.154009224619785	0.116691373494544
Tmie	0.00519807599408168	0.00834096079995411	0.00120290258825591	0.00263772781511815
Tnfrsf1b	0.000153270883718479	0.000837233775091364	0.023787351565352	0.0110500189394624
Tnfrsf21	0.0816462150451778	0.0462378774275208	0.156985620523461	0.10740929293776
Tnfsf10	0.000306518279073199	0.000837233775091364	0.0169733754471081	0.0097881683516695
Tnfsf13b	0.0105209615676725	0.00834096079995411	0.0245706001640373	0.0150952164779262
Tnxb	0.00474050755719733	0.00501292041160023	0.0278275486261172	0.0377139580405893
Tox3	0.0389324035651341	0.0288939719308479	0.0978915598475721	0.0829821243349979
Traf3	0.132996745530243	0.11834967772269	0.277756435861815	0.228089172700156
Trafd1	0.201578931175795	0.273784737873289	0.47779326355565	0.281725804905047
Tram2	0.0269187263190687	0.0378051735222467	0.0926635230759622	0.106017711318951
Trim46	0.0242293061078922	0.0207233883910443	0.0538883963792364	0.0684595243011517
Trim47	0.0130961757140229	0.00875618815618156	0.0232648448038202	0.0345515715811878
Trim5	0.00107240318220319	0.00584596944572232	0.0734638867614077	0.0152746237944978
Tsc22d1	0.26986238764055	0.230834817126885	0.454721583613879	0.470351340963985
Tsc22d3	0.607925072517211	0.714317753964916	0.355025813689105	0.273099301308129
Tspan6	0.0258736999845498	0.0157888010047194	0.0317219360764987	0.0255367826404814
Tuba4a	0.0203317739991194	0.0280799111686847	0.122328585652431	0.0669274549099928
Tvp23a	0.070566393195199	0.137146397838435	0.325236508326864	0.147966815327917
Twsg1	0.151082594038676	0.175470489120162	0.320491611472514	0.234304944013372
Txn1	0.389400662900043	0.451060429625935	0.814386260416564	0.43796699645172
Txnl4a	0.333999298992341	0.330132103893585	0.149412785208057	0.228813925039444
Uap1l1	0.0722789920760665	0.0565807977858837	0.140853271264954	0.162006712407407
Ubd	0	0	0.0155259883953709	0.00218344325250965
Unc5d	0.0475931398650078	0.0264497988581464	0.0652286671342438	0.0979576732974495
Unc93b1	0.111017529866945	0.11723290786459	0.256356820744404	0.188151358084792
Upp1	0.000766119606917842	0.00417917682815104	0.0193373174659848	0.00191077342218943
Ust	0.0374570192830779	0.0644647272333581	0.148375668258473	0.0684595243011517
Utrn	0.0343516087696905	0.0442365312148707	0.129521246550273	0.103967743455472
Vamp5	0.238720909187976	0.193923000890171	0.59467830561365	0.742162878601362
Vamp8	0.054293921557556	0.0454378195246604	0.143057984707871	0.170336997455781
Veph1	0.00122550979841676	0.000418704507592392	0.0245706001640373	0.00635509723404007
Vmac	0.0356836800097395	0.0272651871716469	0.062468453806555	0.0682043423496777
Vopp1	0.0506577635688926	0.0418296166273151	0.0865498413851731	0.0830659444017286
Vps37b	0.101230283231545	0.103355877026829	0.209316260337152	0.198510397689956
Vwa1	0.0775411168763878	0.0703371503458128	0.199066921412963	0.0937373210830735
Vwa3b	0.0245284880091882	0.0120718146767755	0.138177887771482	0.135875932898273
Wfdc18	0.0854531134593812	0.0490330500866519	0.00360437552438371	0.0294354861347372
Wwc2	0.231937030620519	0.201141215783716	0.490975845568863	0.438084541057417
Wwtr1	0.00443534557515552	0.00750998848799739	0.0247010819741774	0.0115002942607062
Xylt1	0.0576275495978376	0.0965346178081938	0.337430723446182	0.138654745167181
Yjefn3	0.0717084516087298	0.0656419739246193	0.0156576556379428	0.0345515715811878
Ypel4	0.0227320524795622	0.0260418552440025	0.0651033680373047	0.0635998969049442
Zbtb4	0.0874213699518707	0.103355877026829	0.195113654145051	0.251449669310189
Zbtb42	0.000612942633479883	0.00250960137389276	0.0156576556379428	0.0145568013254179
Zbtb7b	0.0752690006772132	0.11834967772269	0.23744674777616	0.138734026451304
Zc3h12a	0.0231814640007256	0.036998337707639	0.125636559514138	0.0914126687716693
Zeb1	0.00809115752824531	0.0190812300161967	0.121736722813804	0.0646249407439909
Zfhx3	0.437053361564508	0.386038425204513	0.776047505337565	0.693155495782055
Zfp217	0.00137859297658287	0	0.00586715012990655	0.00209256156980109
Zfp219	0.0406999961777395	0.0244084145680326	0.0795343446741685	0.045663460622316
Zfp455	0.0257243213188557	0.0170247325549999	0.0330167022242231	0.031820368727751
Zfp488	0.0352398533909536	0.0430337980756471	0.128463282175873	0.0392038379929765
Zfp516	0.0221325227686674	0.0178478391107953	0.0440830273292906	0.0312026117648569
Zfp521	0.0411414065770374	0.0546000650660639	0.149758251970768	0.0715166393034488
Zfp692	0.248333021619223	0.251889478615516	0.111022849259813	0.194169663990849
Zfp709	0.0209323839605963	0.0284870243866296	0.0499523349454609	0.0392038379929765
Zfp808	0.0632549481864226	0.0526154012564108	0.113413649599156	0.134841832752295
Zfp827	0.322185612176601	0.262575004255373	0.484076662869021	0.449421194350453
Zfp995	0.0496372655251445	0.0601362598868234	0.121618308198271	0.0989481141884597
Zfpm2	0.104963490022847	0.194957369889101	0.463173002230556	0.33888109830579
Zhx2	0.296992803228636	0.314965679718807	0.573198412561939	0.397423700752335
Zmat1	0.626938786573398	0.501515519661814	0.260178782717215	0.703529635541304
Zmiz1os1	0.029898512300053	0.0162009479366463	0.0392083501880991	0.0864965319125669
1700001K23Rik	0.00290813724247059	0.00875618815618156	0.00333782981458133	0.0013652106136253
1700008O03Rik	0.00824319337056223	0.00292725663662312	0.00958294746135343	0.012759987608853
1700012D14Rik	0.244979281807058	0.160958599798007	0.135728879395367	0.33602150565323
1700022I11Rik	0.018377296569641	0.0203131015422689	0.0127569640508344	0.0105995407790167
1700028E10Rik	0.182477473948627	0.119465201796997	0.166767981873404	0.255125931583082
1700029J07Rik	0.127074707560524	0.078888133660892	0.0847084245013959	0.157582035447161
1700085D07Rik	0.189477276653056	0.177927217562772	0.0991034750355699	0.0857444836361351
1700086P04Rik	0.00672179377435369	0.00501292041160023	0.01328498874192	0.0177829524428426
1700087I21Rik	0.00672179377435369	0.00501292041160023	0.0113034568890919	0.036221855033433
1700121C08Rik	0.000766119606917842	0.000837233775091364	0.00878786668995329	0.0137486346607492
2310015A10Rik	0.169753014849186	0.11088087886894	0.11995902958109	0.250953754132011
2310047D07Rik	0.00915492333118366	0.00417917682815104	0.00506910832243567	0.0155436744331906
2610316D01Rik	0.213535885029034	0.14478468956572	0.189043600659178	0.305155913293916
2700038G22Rik	0.0300472687765149	0.0430337980756471	0.0249619945290541	0.0237596074337894
2810407A14Rik	0.0097622818257633	0.00501292041160023	0.0081248161439303	0.0273994236613476
2900052L18Rik	0.230233845725839	0.149123374764009	0.198518790189564	0.289051435012962
3830408C21Rik	0.0203317739991194	0.0137255145116264	0.023787351565352	0.0508705322511621
4833422C13Rik	0.017021955587631	0.0252254684220357	0.00892042405915403	0.00644559237227767
4930419G24Rik	0.677396905367336	0.582595228990584	0.309266400073604	0.202981071729124
4930432B10Rik	0.012490839328582	0.0120718146767755	0.0345682119698916	0.0402541831042449
4930432K21Rik	0.0318306226085564	0.0248170249421569	0.0257443239900115	0.0557922620589661
4930447A16Rik	0.0133987065501217	0.0162009479366463	0.010245032216892	0.00563084115954639
4930452G13Rik	0.0140034937859669	0.0190812300161967	0.0149991459939468	0.00861502250432102
4930488L21Rik	0.243538514447314	0.226169415961224	0.318840148170598	0.502932221555998
4930505M18Rik	0.00809115752824531	0.0199026462890986	0.00865529174696685	0.00572140186020905
4930512B01Rik	0.290020865474159	0.269315912063362	0.162116232063294	0.140080847485113
4930532I03Rik	0.0309393432363442	0.0329543648898555	0.0168418813392024	0.00996853023637524
4930587E11Rik	0.163004034113024	0.265469530582458	0.187714314584062	0.114094563289237
4932438H23Rik	0.0165697667417672	0.0116579620639779	0.0213030093175369	0.0641125501638208
4932443L11Rik	0.206952334505726	0.194612699089038	0.0964353202203944	0.0929077083353686
4933406C10Rik	0.096926751102684	0.0908144747760171	0.107425897104542	0.19063829965184
4933406J10Rik	0.00930679754123611	0.0133123458625384	0.00586715012990655	0.00372716949636501
5031434O11Rik	0.0734190973890878	0.0414279003614992	0.0507153633581713	0.0958910986949384
5033421B08Rik	0.0727066839079297	0.0494317234346233	0.0434429784384291	0.120493254249737
5430402O13Rik	0.0398165904193415	0.0280799111686847	0.0404934655758653	0.0659047697397016
5430403G16Rik	0.0610943101342011	0.0609246487887967	0.0970423444684668	0.1414258570315
5430427O19Rik	0.00443534557515552	0.00250960137389276	0.0136808243715954	0.0157230013183738
6030407O03Rik	0.39488926660432	0.238782354624021	0.140156034901422	0.617799072079375
6720489N17Rik	0.0548744818272794	0.0426325653549684	0.0610854848337457	0.0987831088147678
6820408C15Rik	0.0071784567414621	0.00250960137389276	0.00533519302794678	0.0116803476351345
9330175M20Rik	0.140217093521721	0.155237799670235	0.061965777263355	0.0460114435350645
9530051G07Rik	0.0194301821416663	0.0174363705209455	0.0168418813392024	0.0421769551612373
9530062K07Rik	0.0508034640273084	0.0325490666967036	0.0385651726425628	0.0665014631858862
A330015K06Rik	1.12160438528912	1.16246974749395	1.25952207886066	2.00717654324037
A430010J10Rik	0.00824319337056223	0.00459613551091848	0.0123607624828609	0.0201064945318763
A530072M11Rik	0.0355357596892945	0.0394168948216394	0.0688555282874732	0.0804642497556335
A730056A06Rik	0.00183770195452845	0.000418704507592392	0.00679739468450986	0.00969797520894609
AC163638.2	0.029600932945198	0.0382083474417752	0.0286076403615556	0.0195707714991509
AI197445	0.017021955587631	0.0166129250734579	0.0313331791045108	0.0570834381168673
AI504432	0.116353140413852	0.100708691283231	0.150563877258079	0.216127671747783
Acad12	0.073134192897687	0.045037550410389	0.0498251069201615	0.112956334886635
Acat2	0.285192102325255	0.367361434460457	0.174772621281893	0.13659122246677
Acat3	0.0213826048195376	0.0418296166273151	0.0356012160884655	0.0207311422174405
Acly	0.627920952453005	0.716570321163722	0.53876223980368	0.361721904603911
Acsbg1	0.0239300346699979	0.0227723013976646	0.00772677468836313	0.00735009362442107
Acsl3	1.38235148050239	1.31058137241205	0.93934099551965	0.744977303784596
Acss2os	0.0409942914254474	0.0349783955118732	0.0153943038142533	0.00942734696168365
Adam11	0.0672756911890798	0.0353827104962159	0.0797813374305709	0.239192533163235
Adgrg2	0.0270679266859487	0.0345739169908013	0.033663457182979	0.019749377734087
Adgrl1	0.0632549481864226	0.0664260358065664	0.0941252616951786	0.134523432833994
Aff3	0.875375807996192	0.866890982372701	1.263726008915	1.35082578117991
Agbl3	0.245938641442894	0.188041280625837	0.20975008083782	0.410618335331741
Ago4	0.123829661961908	0.0738441222081348	0.119840404260981	0.151417036739234
Akip1	0.053131788887987	0.0341692748006526	0.0434429784384291	0.0682043423496777
Alg3	0.0779665645288912	0.0877503000298518	0.0557873947032117	0.0439217273560483
Alms1	0.0910664570707243	0.0628929060118188	0.0780511056490694	0.127573033842509
Amotl2	0.328606609020353	0.219466571874644	0.333797625077034	0.435082829135681
Ankrd9	0.0291543978092468	0.0510248293205411	0.0339220420901595	0.0239374671476583
Apln	0.270447361111838	0.370546778375633	0.355494553290203	0.202832370825297
Arhgap15	0.0729917102072406	0.0892835610483347	0.112218963920097	0.202981071729124
Arhgap27os2	0.00168468904746881	0.00958612598504419	0.0131530087052927	0.00172895222163842
Arhgef37	0.324958340316272	0.369100152476043	0.563806114291672	0.769703855078736
Arhgef40	0.0287076631905885	0.0244084145680326	0.0334048053923488	0.0650517324309064
Arl4d	0.235092412716376	0.33223716574296	0.136312520864182	0.126771033122216
Armc3	0.00626492217089964	0.00667832508674155	0.0240485026017745	0.0336713531696451
Arpc1a	1.03218833299066	1.36999076826153	1.08262371712205	0.898622481763148
Atp13a4	0.00244951956068899	0.00834096079995411	0.00106931817837311	0.000182135803982034
Atp1a2	0.118533899888791	0.120208193782494	0.0421616503563831	0.0507839695325318
Atp8b5	0.0846083875871608	0.130184926739135	0.129521246550273	0.302130765452822
Atxn1	0.641167367125725	0.639197139781262	0.85830631841082	0.918375073697285
B4galt2	0.0307907194124208	0.0186702687193499	0.0232648448038202	0.0393789721422416
BC055402	0.00336654469048739	0.00917124317021038	0.00480295279700954	0.00254688741105352
Bcl2l11	0.0779665645288912	0.0585576149579719	0.0829867040802688	0.121461635282996
Bfsp1	0.0248275804274451	0.0112439381062813	0.0219573822170792	0.032437744302573
Bglap2	0.0097622818257633	0.0070942432453686	0.0269166718032671	0.0498312847542687
Bhlhe41	0.436260960364888	0.32560627982575	0.620104200206541	0.801708489466232
Bmp2	0.106342630067521	0.0644647272333581	0.0415203701133545	0.0271335444069296
Brd3os	0.0227320524795622	0.0317379771773892	0.0231341754439592	0.0164399874506897
C230037L18Rik	0.186937559336867	0.124284811268633	0.12031482113298	0.26138680414877
C2cd6	0.00550300534400967	0.00167376717612451	0.00971539948560274	0.0174250047556876
C78334	0.0105209615676725	0.0137255145116264	0.0081248161439303	0.00481542558595087
Cab39l	0.780786479373132	1.00707020552977	0.789557999616222	0.521323602341304
Cables1	0.0138523312642616	0.0166129250734579	0.0136808243715954	0.00599303476514948
Cachd1	0.698810510949227	0.637648918766863	0.802348981229618	1.04201093773536
Cacnb1	0.0343516087696905	0.0272651871716469	0.04523408399519	0.0758316159983658
Cage1	0.0396692802236952	0.0223628545022831	0.0318514881561948	0.0505242364089325
Calhm2	0.0297497336918095	0.0337644688089185	0.0248315467610359	0.0176039946150833
Calr	1.6287602819138	1.82531499403434	1.24318341133883	1.20554061897053
Caprin2	0.0615268113745806	0.0581625640244486	0.0959494353778093	0.136034930357304
Car10	0.00702625892247961	0.00875618815618156	0.00347111155030942	0.00163802922275416
Carmil3	0.0505120418787598	0.036594675549941	0.0377928131354557	0.085326434523758
Casq1	0.144736637068063	0.21373361517937	0.135144897090253	0.093654390773031
Catspere2	0.160657195600124	0.173007710295715	0.265730694963783	0.389990009178429
Cbr3	0.000919273120764033	0.00542953167499542	0.00200403452365052	0.000910347466550551
Ccdc134	0.130712840915188	0.203535755300553	0.184494559309327	0.112223931896921
Ccdc15	0.128288889940959	0.0991928614886349	0.112458015265102	0.183234673486789
Ccdc171	0.118125369574164	0.112753314741341	0.20420472193613	0.2043926285736
Ccdc18	0.0195805039117104	0.0174363705209455	0.0195996330702768	0.0439217273560483
Ccdc28a	0.118806160740762	0.0656419739246193	0.0882654432465073	0.137226606176579
Ccdc62	0.211428898033558	0.152724621401701	0.12280182383547	0.336542040185747
Ccl7	0.000153270883718479	0.00417917682815104	0.00160354878249831	9.10720486723978e-05
Ccn4	0.0195805039117104	0.045037550410389	0.0279576061826218	0.0208203457578027
Ccne2	0.0215326334062659	0.0260418552440025	0.01328498874192	0.0147363052549447
Cdk15	0.00367203295444615	0.00334473753625611	0.010245032216892	0.0237596074337894
Cdkl3	0.180559902423314	0.125024232258814	0.133156802428747	0.262718332649719
Chn1	0.232180106117902	0.154161496572403	0.261003235750952	0.285771806570492
Clstn2	0.0192798377715903	0.0337644688089185	0.184272124623992	0.149065904832005
Cnbd2	0.11703513875646	0.0984340840671952	0.123511261460345	0.206765492899541
Cntfr	0.084749224794736	0.0644647272333581	0.0634730494763347	0.208023790668551
Col13a1	0.00153165272387637	0.0235906925910996	0.106464520743431	0.201269674868024
Col9a2	0.0278135947916666	0.0186702687193499	0.0372775751875002	0.0504376437075035
Cpeb1	0.526315556707984	0.404093433078597	0.660841585301786	0.884130999551394
Cpeb2	1.4255698777968	1.21228326403179	1.37167052984129	1.71147863650101
Creld2	0.220568265938636	0.358329579050969	0.172411717675208	0.130934430668241
Crtac1	0.243898900941218	0.147679236931772	0.212240903044417	0.350751579445011
Csdc2	0.100953194187596	0.125393737826146	0.0763178749760233	0.0658194987466434
Cst6	0.00199069145222025	0.00292725663662312	0.0117000775016271	0.0162607891058308
Ctsh	0.0251265834161744	0.0186702687193499	0.0118322494228597	0.00526851632220264
Cul7	0.0605173506817332	0.0394168948216394	0.0549016442372398	0.0893325099455503
D7Ertd443e	1.51138647488882	1.31035548119344	1.695997222213	1.86251147512001
Dab1	0.123694222938002	0.0988135447458102	0.0524935020867072	0.0455764459701945
Dad1	1.1654200694396	1.14129322447396	0.729947698596202	0.730298903516256
Dbf4	0.0222824388968713	0.0182591384638778	0.0276974741524444	0.0406915015049119
Dbn1	0.00321376555522446	0.00125558794912177	0.0136808243715954	0.0132993708016648
Dbx2	0.00535055229178419	0.00626223386821858	0.00173706185132296	0.00163802922275416
Ddit4	0.344263755064499	0.44194952865022	0.470217408884974	0.253501559135771
Ddx4	0.00244951956068899	0	0.00693021615067291	0.0134791005665856
Dgkz	0.155946930711571	0.138970337708753	0.232583338145893	0.332631410547079
Dhcr24	0.595242643772589	0.820050924120308	0.516032918712915	0.205505609822257
Dip2a	1.57736553048543	1.32815647945811	1.43327773468646	1.89103631670964
Dmrtc1a	0.0123394479598657	0.00958612598504419	0.00546820883500981	0.0291701477481108
Dnajb11	0.638256838631564	0.825568870370809	0.548623407654616	0.428518377361835
Dnm1	0.00778701648134303	0.00584596944572232	0.0156576556379428	0.0187666484419402
Dnm3os	0.0905065385220031	0.0601362598868234	0.033146086683661	0.0209095413416029
Dynlt1a	0.0471545687833544	0.0609246487887967	0.0416486590654078	0.026335482229689
Ebp	0.760000276912145	0.80387451399863	0.50236975108975	0.369808465607446
Eda2r	0.0245284880091882	0.0190812300161967	0.0271770069980139	0.0609469935117312
Eef1b2	0.979727272034295	1.20390016637276	0.837224448393713	0.820968006791616
Eef1g	0.859083764852871	1.03542455959687	0.748972297139451	0.658028098712455
Eepd1	0.099705342479411	0.0957738199197468	0.187714314584062	0.183386317106014
Efna5	0.00748278290452147	0.00501292041160023	0.0138127347700657	0.0201064945318763
Efs	0.0826345811538355	0.0446371210165967	0.0652286671342438	0.108063485409823
Egf	0.0433455406481634	0.036998337707639	0.0634730494763347	0.0905811244164206
Egfem1	0.072849207212584	0.0506267907221007	0.0352139645837203	0.079707649479517
Eif3j2	0.095952417259722	0.0957738199197468	0.113294245238116	0.0363096874552716
Elovl1	1.06801389908692	1.14329768327379	0.771297020839614	0.63372784884437
Emc4	0.593635388297239	0.647779336070534	0.385409805043254	0.359944218617042
Eml2	0.88059978249353	0.666662895354535	0.923162229830248	1.22043320222296
Enc1	0.105515374304957	0.168771641172674	0.0947336893986973	0.0707532362893703
Endou	0.000766119606917842	0.00542953167499542	0.00160354878249831	0.00072834425977046
Epb41l4a	0.325733328485564	0.230834817126885	0.303458098599744	0.410920316619966
Erbb3	0.629555754955853	0.51686822481704	0.304050316664632	0.301322511378567
Erbin	2.06849349794687	1.96874588802262	2.34199105357572	2.61541491947502
Erg28	0.639389717646258	0.624054846967615	0.419655735785267	0.317364759648538
Etl4	0.0130961757140229	0.0301138218681836	0.0806453319764761	0.153840746347523
Etv1	1.6107985775204	1.62016185864335	1.35407842368512	1.1441703213673
Eya4	0.0812223303458667	0.16238370073681	0.424391172965019	0.650452956759806
F8	0.104687433623655	0.107501633690791	0.153665223561915	0.259069927129531
Fads1	0.0798080822645699	0.0931064598858359	0.0827405018560283	0.0314674114797567
Fam169a	0.0840448403218243	0.64931196408791	0.69164797713337	0.0332309532491062
Fam186a	0.0246780454003509	0.0166129250734579	0.0220882054282077	0.041827635117004
Fam20c	0.143542273746994	0.101465745397882	0.106825145197425	0.188302258006183
Fam53b	0.449549346920299	0.330734002444183	0.456332859020828	0.562014040053867
Fam71e1	0.0264709916074155	0.0190812300161967	0.0377928131354557	0.0535502666912678
Fbxl21	0.0246780454003509	0.0116579620639779	0.0203861672788196	0.0278423987195099
Fbxo2	0.421185392884577	0.380042380378864	0.471803928347603	0.136273379155537
Fbxo47	0.0186782341549897	0.0145513400371919	0.0233954970914304	0.0393789721422416
Fdft1	1.05363424454243	1.18858015163117	0.672582271690024	0.400845470241201
Fggy	0.513556673902811	0.382330829246966	0.512354210498159	0.68840832296196
Fhit	0.589988348265442	0.468250620983392	0.775185457737147	0.876540419648367
Fignl2	0.0194301821416663	0.0264497988581464	0.0514778100024008	0.0594033621386684
Filip1	0.0225822037455846	0.0186702687193499	0.0318514881561948	0.0501778206043488
Flrt1	0.0633988248726106	0.0482352262523334	0.0728423752465774	0.113200350061881
Fmnl3	0.0532771293514755	0.0309262292578087	0.0322400437232659	0.0572554690318662
Fndc10	0.0240796815843692	0.0116579620639779	0.0126249143024845	0.0265128844293419
Fosb	0.040847154627805	0.0112439381062813	0.0401081043395795	0.102817923194334
Frmpd1	0.00763491126269086	0.0070942432453686	0.0111712150532291	0.0414781930056357
Galntl6	0.0529864272975776	0.0738441222081348	0.0412637428245228	0.0282851776376519
Gas6	0.0937217971946921	0.142245069422194	0.242181653183444	0.346509878063853
Gdap1	0.067132371253622	0.0938692890301891	0.0702278005118336	0.0356068119786929
Gfap	0.185028529450645	0.381473274515011	0.164047633070429	0.138337557160515
Gm10401	0.0222824388968713	0.0329543648898555	0.0107743845858337	0.00987835336032354
Gm10538	0.0272171047954	0.0418296166273151	0.0216956844394868	0.0193921333583289
Gm10545	0.00168468904746881	0.00542953167499542	0.00360437552438371	0.00109231755419106
Gm11613	0.0210824801034612	0.0215434574277673	0.0324989969180817	0.0460114435350645
Gm12526	0.00702625892247961	0.0157888010047194	0.00825746142868109	0.00291019952593006
Gm13270	0.0186782341549897	0.0182591384638778	0.0447226668195919	0.0656489349439998
Gm13572	0.025574920335842	0.0317379771773892	0.00839008912099384	0.00780203763943284
Gm13594	0.0097622818257633	0.00542953167499542	0.00706301997763692	0.0177829524428426
Gm13703	0.0210824801034612	0.0235906925910996	0.0105097434281038	0.00879559608487089
Gm13830	0.0658415666674639	0.0430337980756471	0.0341805601484716	0.0914126687716693
Gm13905	0.24473929802113	0.263540777583877	0.166088588135955	0.119847145522734
Gm14027	0.00793909856751618	0.00334473753625611	0.00971539948560274	0.0211770803678231
Gm14280	0.00214365754770589	0.00167376717612451	0.00613302260162139	0.0207311422174405
Gm14320	0.00397742792382517	0.00167376717612451	0.00600009520178534	0.0105995407790167
Gm14401	0.00733063139979343	0.00542953167499542	0.0118322494228597	0.0187666484419402
Gm14403	0.0294521100536291	0.0207233883910443	0.0232648448038202	0.0400792021806561
Gm14412	0.0287076631905885	0.0305201080637147	0.0692299711442864	0.133726989224628
Gm14634	0.0850308397184932	0.0652497123306917	0.0754501318030404	0.146787877377554
Gm14798	0.0353878174851912	0.047037295749401	0.028347677393116	0.0208203457578027
Gm14858	0.0491995902182583	0.0585576149579719	0.0339220420901595	0.026424187263458
Gm15283	0.112936154378956	0.11723290786459	0.0953417471430276	0.0635144291380092
Gm15461	0.00596022509867385	0.00917124317021038	0.00613302260162139	0.00291019952593006
Gm15478	0.178510431701448	0.16629228864822	0.0961924073096116	0.0856608877936955
Gm15675	0.00580784174037275	0.00209177160235687	0.00453672641396013	0.012759987608853
Gm15860	0.0306420734961728	0.0223628545022831	0.0206482079336991	0.0490511397440014
Gm15886	0.0652673404831767	0.08390683069493	0.0477872540016196	0.0304077916466992
Gm15943	0.0114306181253069	0.00334473753625611	0.010377396581501	0.0394665277162281
Gm16054	0.00641723589896841	0.00792556095834617	0.00280452516039778	0.00236518184323854
Gm16083	0.0615268113745806	0.0333594988829297	0.082494239001325	0.131413709175399
Gm16275	0.0109758932808678	0.00459613551091848	0.00799215326207374	0.0169773898935098
Gm16364.1	0.00367203295444615	0.00792556095834617	0.00333782981458133	0.003454920326146
Gm16759	0.547106892072106	0.470346058852016	0.505843406348271	0.779442494707134
Gm17638	0.0103692716598997	0.0186702687193499	0.00852269922553442	0.00798275806999161
Gm19938	0.073134192897687	0.0585576149579719	0.0978915598475721	0.14686651649681
Gm20539	0.00413009044085118	0.00334473753625611	0.0122286604023714	0.0133892397219737
Gm20721	0.0796665473888099	0.0865988095209412	0.0551547958655941	0.0449671313096707
Gm20754	0.131250699704835	0.0726764975934755	0.176343466102688	0.152434146377769
Gm2447	0.0143057502963191	0.012899006434555	0.0111712150532291	0.0331428499859634
Gm26660	0.0246780454003509	0.0215434574277673	0.0275673827572018	0.0436602055174931
Gm26728	0.0111274912051397	0.0153764841376583	0.0215648098640616	0.0382400515261708
Gm26843	0.0524047695438306	0.036998337707639	0.0359883176875321	0.116772415254645
Gm26881	0.025574920335842	0.0162009479366463	0.0270468478724422	0.0585447584299562
Gm26935	0.0426113689596275	0.0293007539361259	0.0232648448038202	0.0628304239044879
Gm26936	0.316840326201111	0.25967207531817	0.152173183346882	0.124843603040406
Gm26979	0.0414355719675296	0.0482352262523334	0.0203861672788196	0.0178724193484408
Gm28085	0.0192798377715903	0.0256337451439472	0.029646816954459	0.00996853023637524
Gm28221	0.025574920335842	0.0207233883910443	0.0152626018900229	0.0108698520262214
Gm28319	0.0393745947155338	0.0297073705370852	0.0143402024292429	0.00915664545494645
Gm28370	0.0106726284691069	0.0137255145116264	0.00653169881583938	0.00445280512920836
Gm28379	0.119214413082956	0.124284811268633	0.0712246352083636	0.0578573442834664
Gm28501	0.0633988248726106	0.102600253032881	0.069604273846125	0.0288162536790315
Gm28782	0.028260728910912	0.0203131015422689	0.0123607624828609	0.0101488595965376
Gm28836	0.0297497336918095	0.0235906925910996	0.0416486590654078	0.0450541989949427
Gm28905	0.00519807599408168	0.00209177160235687	0.0081248161439303	0.0339355000550217
Gm28941	0.0185277766827441	0.0215434574277673	0.0248315467610359	0.0412160312642178
Gm28981	0.0327211083091799	0.0272651871716469	0.0335341396502575	0.0642833761971055
Gm29114	0.0185277766827441	0.0382083474417752	0.0220882054282077	0.010419292678916
Gm30606	0.0123394479598657	0.00958612598504419	0.0134169513621159	0.0328784936138486
Gm32036	0.107582231964803	0.146956385186675	0.143637365478451	0.0568253362416958
Gm32926	0.105653297798573	0.106372676236739	0.134677465576379	0.254490621781064
Gm33255	0.0906465475533743	0.180028191674525	0.0642258344869484	0.0319085885777438
Gm34408	0.0865783057820202	0.102600253032881	0.0447226668195919	0.0321732014408806
Gm35850	0.0182267938088654	0.0182591384638778	0.0332754544049261	0.0604327144305962
Gm36584	0.0071784567414621	0.00542953167499542	0.00466984846504569	0.0182302069490388
Gm3764	0.0100658227974131	0.019492022493232	0.00240435994017945	0.00227431667648851
Gm37756	0.0132474525726856	0.0178478391107953	0.00865529174696685	0.00626459390569124
Gm37850	0.0156647751630896	0.0186702687193499	0.00839008912099384	0.00707882914128072
Gm38948	0.0443724763198009	0.0660340817097202	0.0632219951567155	0.0368365200427162
Gm41664	0.0117336531873884	0.00626223386821858	0.0106420727613365	0.0184984636666735
Gm42067	0.00702625892247961	0.0157888010047194	0.0174991790399051	0.00626459390569124
Gm42477	0.00656952643109844	0.0157888010047194	0.00971539948560274	0.00599303476514948
Gm43329	0.0540035149799203	0.0478360755120698	0.0647273765197556	0.0848245447896708
Gm43330	0.0506577635688926	0.036998337707639	0.0649780532385344	0.0809683321023096
Gm43331	0.0306420734961728	0.0223628545022831	0.0305552114706056	0.0423515694348228
Gm43813	0.0458377002884853	0.0341692748006526	0.0488066995663654	0.0634289540657106
Gm44899	0.0609501014757902	0.045037550410389	0.0499523349454609	0.0980402475164017
Gm45639	0.00489305363388297	0.00250960137389276	0.00746132567017027	0.0226027475723912
Gm45708	0.00930679754123611	0.00542953167499542	0.00533519302794678	0.0222465212753727
Gm46332	0.00656952643109844	0.00667832508674155	0.0156576556379428	0.0277538194046388
Gm46367	0.148179028476361	0.129449313245532	0.069604273846125	0.0577713842802935
Gm47059	0.00687403793579491	0.00501292041160023	0.0142083615954803	0.0289047389383387
Gm47167	0.102614577944976	0.11536884878922	0.0817550863556332	0.0578573442834664
Gm47661	0.0215326334062659	0.014963997195271	0.00613302260162139	0.00318259701613135
Gm47849	0.00107240318220319	0.00125558794912177	0.00679739468450986	0.0097881683516695
Gm48653	0.0180762683935992	0.0174363705209455	0.0245706001640373	0.0390286731663684
Gm48796	0.0179257203170211	0.019492022493232	0.0218265418889988	0.00807310603929364
Gm4924	0.252628511461298	0.200113226705554	0.226204004874405	0.390298283559914
Gm49267	0.00275528805070549	0	0.0120965408686167	0.00987835336032354
Gm50323	0.436360044859906	0.349510711066795	0.370009941964779	0.649930051536354
Gm5820	0.0691369835626212	0.0585576149579719	0.0516048279445544	0.0297007541355797
Gm7580	0.0456912744635344	0.0561849649817562	0.0330167022242231	0.0184984636666735
Gm7598	0.0251265834161744	0.0137255145116264	0.0081248161439303	0.0314674114797567
Gm807	0.00367203295444615	0.0104153755882521	0.00785947277844183	0.00191077342218943
Gna12	1.36980819733527	1.14689561513235	1.0711889834714	1.61386769397756
Gpr22	0.0106726284691069	0.0124854960864383	0.00865529174696685	0.00581195436037384
Gpr37l1	0.0570485859138934	0.0842918430616629	0.214509726288763	0.0433986152673744
Gpr82	0.00336654469048739	0.00542953167499542	0.00120290258825591	0.00081935000380641
Gramd1b	0.533354092279939	0.455319358079192	0.57387669018639	0.799909326054546
Gramd2	0.00580784174037275	0.0182591384638778	0.0159209381257086	0.00626459390569124
Greb1l	0.350652932889487	0.308834112812785	0.401113527004743	0.469041718619539
Gria2	0.0764057040906645	0.170891918767719	0.127286451964843	0.0581151799671427
Grik4	0.485938305807058	0.310370532775392	0.317964738672322	0.593344351176989
Grsf1	0.0843266536526821	0.114248743197005	0.0802751400024156	0.0605184459797577
Gucy1a1	0.0209323839605963	0.0162009479366463	0.00533519302794678	0.00363642800822183
Gulp1	0.0294521100536291	0.0394168948216394	0.0701031262776535	0.206024577455471
Gxylt2	0.00885110569623134	0.0116579620639779	0.00918548609483041	0.0281080895960809
Hba-a1	0.0130961757140229	0.00584596944572232	0.0182873664120825	0.0962220377588898
Hdac11	0.367882936426866	0.254490413192525	0.191144696506301	0.457234947130444
Hdac9	0.352917232156697	0.234816481273708	0.328130474487606	0.420894672058436
Hk1os	0.0071784567414621	0.00750998848799739	0.0182873664120825	0.0219792682516091
Hk2	0.0267695036881174	0.0526154012564108	0.0773086603206543	0.021533687763642
Hmcn1	0.151741321187735	0.0628929060118188	0.629198489709153	0.675467967727949
Hs3st5	0.00321376555522446	0.00125558794912177	0.00839008912099384	0.0339355000550217
Hsd17b7	0.307191311629306	0.419903735626002	0.347968225247706	0.207209778810338
Hspa5	1.6900499402452	2.13751843807283	1.51707164708177	1.36126911106432
Htr2b	0.0252760513911753	0.0309262292578087	0.0291273636440001	0.0148260451380312
Id4	0.0312365246334783	0.0227723013976646	0.0390797477689232	0.0623171127690309
Impdh2	0.363523266417676	0.456646561978969	0.241026300519319	0.255690312766035
Insig1	0.774800713103155	0.908600895249568	0.697723612480201	0.277939308252396
Insyn2a	0.161700914955056	0.176875072900487	0.128228026901938	0.0758316159983658
Itk	0.0071784567414621	0.00209177160235687	0.00958294746135343	0.0317321410943297
Jade3	0.0431987494247702	0.036998337707639	0.0630964443573475	0.0760848592565646
Jagn1	0.407002046076856	0.435196978790788	0.246998717301537	0.219789655382888
Kcnmb4os2	0.000919273120764033	0.00584596944572232	0.00506910832243567	0.000637330232935276
Kctd16	0.306740246361131	0.231831720429285	0.239132839403578	0.438084541057417
Kif18a	0.0402583908492541	0.0325490666967036	0.0528741208085956	0.0783611672540683
Kif7	0.0114306181253069	0.00875618815618156	0.00825746142868109	0.0296123392869698
Klf11	0.0500747493561577	0.0325490666967036	0.0560403222300114	0.0855772849624069
Klk12	0.000459742193262117	0.00209177160235687	0.0139446277704778	0.020374248461975
Lctl	0.0146079154752782	0.00958612598504419	0.0155259883953709	0.031820368727751
Ldlr	0.588457722237629	0.861596994862789	0.619960319490888	0.150712277406273
Lekr1	0.124371234694741	0.110130921731336	0.160864511281854	0.227871644531902
Lepr	0.00580784174037275	0.00167376717612451	0.00626593233411225	0.0135689533369516
Lonrf2	0.0404056142948419	0.0305201080637147	0.0339220420901595	0.0699043266449356
Lpcat2	0.898234817352409	0.598373480368053	0.721013520622447	0.932919699362622
Lrp11	0.157519485473674	0.156671070834758	0.0991034750355699	0.0775186942610577
Lrrc49	0.370426146812839	0.460089070980443	0.714620138962383	0.885409300102093
Lrrc56	0.0424644699187845	0.0272651871716469	0.0302957543714515	0.0551891422259526
Lrrc63	0.00915492333118366	0.00417917682815104	0.00719580617008639	0.0200172272878805
Lrrc8dos	0.0194301821416663	0.0248170249421569	0.00998025091510072	0.0119503669253329
Lrrtm3	0.758852656724977	0.775161601127295	0.621613699175358	0.399624753359702
Lss	0.303577079726414	0.484118522881004	0.271149984603164	0.144583467531554
Ltbp1	0.00596022509867385	0.0190812300161967	0.0440830273292906	0.0484439392331037
Lypd6	0.0481776022647989	0.0305201080637147	0.0381790674564084	0.0879155262751471
Lysmd2	0.130981806471521	0.182124760946896	0.107185639648303	0.0483571661977977
Magi2	3.81867067538603	3.4292670205778	3.36971722090909	3.8848346947931
Manba	0.188081230404319	0.153802471290582	0.216342629969038	0.342573453867454
Manf	0.632735953295474	0.957199568729777	0.64686254488562	0.475176422334847
Mapk8ip2	0.00428272965559044	0.0112439381062813	0.0159209381257086	0.00254688741105352
Marveld1	0.00397742792382517	0.000837233775091364	0.00506910832243567	0.00969797520894609
Matn2	0.368731392082813	0.499992606843979	0.464098312634097	0.19424466408051
Mfsd2a	0.189350443861983	0.210006464034887	0.453957440790164	0.0776029735067686
Mgat5b	0.00930679754123611	0.0070942432453686	0.010906678906228	0.0347275223275383
Micall2	0.0186782341549897	0.0211335069735566	0.02143391815824	0.0433986152673744
Mir133a-1hg	0.0164189916762276	0.0182591384638778	0.00998025091510072	0.00608356267272915
Mob3b	1.2606698710426	1.0382459305535	1.27384119541261	1.55498907446926
Mrpl41	0.354531455507861	0.497449253530445	0.416662618639361	0.285771806570492
Mt3	0.140483515209894	0.321059879514684	0.425615227161238	0.115150330860657
Mthfs	0.517401460616308	0.397642375410542	0.446454892789326	0.661089183725505
Mttp	0.111840248305457	0.0761752893379666	0.0967995789848604	0.188151358084792
Mvk	0.342632858376738	0.438443893721707	0.270027638979142	0.187094420571573
Myo7a	0.00854719572807053	0.00501292041160023	0.00971539948560274	0.0169773898935098
Myrip	0.228283790016386	0.145871126908816	0.16495523850841	0.253996212739027
Naalad2	0.00930679754123611	0.00958612598504419	0.00493603941456805	0.00200167162686158
Naglu	0.0764057040906645	0.0589525098878824	0.0942469768542277	0.113362993771985
Nde1	0.647203896010771	0.952525397098017	0.968398125898317	0.573063409883315
Ndrg2	0.227185210252209	0.286758292907935	0.213969996991996	0.123154048874258
Ndufs8	0.518771024116094	0.540806277858706	0.303556825969475	0.31384417127948
[truncated: 500 more rows]

## Sheet: DGE_RNA_OPC
Pseudobulk aggregation of the expression of differentially expressed genes in OPC between timepoints, normalized by the total number of counts multiplied by 10,000 and natural log transformed
	Ctrl	Early	Peak	Late
1110038B12Rik	0.0923534358953272	0.232661130396559	0.198819511527482	0.205946195408179
6030407O03Rik	0.221484565718003	0.0432555416334726	0.115892528341602	0.188127053975939
9030025P20Rik	0.165001635532322	0.965366790184912	1.6006549893605	0.281792407498374
A630089N07Rik	0.340144495067964	0.715973596937398	0.547051046588438	0.466405032414208
A730049H05Rik	0.012021499507828	0.117274497766066	0.0871118085070963	0.036065234885225
A930009A15Rik	0.772448061934131	0.422351558887209	0.595038094101202	0.602737020383613
A930037H05Rik	0.117757996183938	0.34193269624255	0.181257716209235	0.150789405711207
AU020206	0.0472424839150418	0.430900493678039	0.57047527294206	0.19364376262307
Abca6	0.293153842274729	0.115817397731317	0.187565249810382	0.149352772162539
Acsl5	0.158141860639254	0.334929824002791	0.28570596446686	0.204586708698598
Acvr1	0.552583656078212	0.952186364305492	0.975881641821299	0.714148065289272
Adamts1	0.435831248905525	1.22814420075255	0.93623105259131	0.599992459828739
Adamts5	0.267261907783491	0.518461945844826	0.267297829900286	0.335125510225596
Adamts9	0.312510866550339	1.27084773875532	1.57398016998176	0.888802577798967
Adamtsl3	0.288633119302002	0.644680264207696	0.539119431572173	0.637306133889257
Adar	0.246999741836304	0.439376963245682	0.377152903853035	0.335722295824873
Add3	0.703063547715641	1.03461756664651	0.964382011442939	0.740760997160439
Agfg2	0.173510705922694	0.367198315994423	0.291389700058313	0.220779824407757
Agtr1b	0.0140111072525691	0.323148277190256	0.338980552993171	0.0924118323971945
Aldh1l2	0.278004603541537	0.504720002605804	0.662177098125856	0.506930802206234
Apobec3	0.0662866231457205	0.226153188852249	0.260306468927251	0.120177976560338
Apoe	2.03624757731773	1.50524757243649	0.980444720069181	1.44436924197356
Arhgef4	0.131990280647915	0.361511925636009	0.397746595742733	0.212041117196716
Arid5a	0.0549037157906774	0.211684864345259	0.167239488817917	0.0724287473654916
Arid5b	0.352972277345372	0.860269144208482	0.899272950026208	0.398725473776625
Armh4	1.68755844373104	1.11614523933165	1.31044007821933	1.58106682813515
Arpc1b	0.305110133139275	0.733423350248536	1.13465998900375	0.619048055386023
Atp10a	0.0606113657032411	0.228761450063511	0.330296225469834	0.1550869642179
Atp1b2	0.736429027503689	1.55521731274665	1.17855586277419	0.808449373382994
Azin1	0.599045050725785	0.950289184285787	0.933252564883722	0.71944632045598
Azin2	0.0868246072889782	0.272091654896322	0.424891974893405	0.150789405711207
B2m	0.665442644999359	1.86918642484088	2.71139439306606	1.82234625329857
Bach1	0.175203865861082	0.368331724133122	0.41892302843007	0.294307090019174
Bcl3	0.00402324526947397	0.279547005988432	0.278842562723079	0.0700970984722149
Becn1	0.299149856711973	0.519436324823574	0.57560697405634	0.378352911480038
Bmpr1b	0.0258663342459704	0.262063929675832	0.160802020218722	0.145030446353441
Bst2	0.00602881420144109	0.819989404281159	0.7162358576619	0.173499208325285
C1ra	0.00402324526947397	0.136026089328274	0.125304925694189	0.019833005527409
C4b	0.243845721270887	1.19351157308361	1.44926562422153	1.08424094149291
Cacng5	0.0297870484149021	0.351194221298983	0.366694805522689	0.0969671518930584
Camk4	0.507504895766233	0.28078417852443	0.240227975142176	0.418691267900997
Car10	0.425347761074676	1.27038824217536	1.01896027388897	0.818807775845303
Casp12	0.0831216659992393	0.265836120261454	0.64002789477709	0.339889852391565
Casp4	0.00402324526947397	0.143145636731962	0.35079968165473	0.14430823886897
Cd274	0.0219301875510741	0.39735826623631	0.269617463556976	0.0630693537202072
Cd44	0.0179784863604352	0.401750041891187	0.629575164316122	0.180491541154425
Cd74	0.00402324526947397	0.140303897426822	0.680011099450713	0.0824702045117705
Cd9	2.01605083923484	2.6751948105566	2.0673392553406	2.01044912551021
Cdh22	0.154694245919113	0.321962452117954	0.271931728963338	0.250452780401137
Cdh8	0.716937356903375	0.414810815181713	0.370891178571152	0.616347958337726
Cdkn1a	0.364238228163613	1.02408989031503	0.61573924415833	0.476302783289406
Cebpb	0.012021499507828	0.120182343840595	0.125304925694189	0.0432846505770849
Cebpd	0.135516925787146	1.05363508146598	0.685376307761332	0.226785272566675
Cecr2	0.29615634351026	0.164205111506661	0.218519596609959	0.213390514224467
Chrm2	0.0239001975536225	0.125972791563163	0.0716989838083385	0.129020133941052
Chst2	0.696053788104279	1.33920354438956	1.55717947443114	0.781692112793399
Ciita	0.012021499507828	0.153028607743314	0.156919553006586	0.0263575494122422
Clec2d	0.00402324526947397	0.0951918768660855	0.139919135071552	0.0181951962777114
Cmpk2	0.0794049619568558	0.227458169835957	0.213630839486418	0.100747463971422
Col16a1	0.248573029503823	0.80106315990953	1.16065791818369	0.605474068938284
Col18a1	0.224709793384502	0.440431487738138	0.680779322408348	0.402639058653488
Col20a1	0.0297870484149021	0.151622720669896	1.08670367395015	0.142138481630022
Cpne2	0.324239283656794	0.175258080449308	0.196329487450991	0.253048256894017
Cryl1	0.628503489424571	0.283253941255212	0.421911955195361	0.433949224653991
Csf1	0.117757996183938	0.415891551934295	0.481763506814185	0.269756614138781
Csrnp1	0.00402324526947397	0.0847173617261019	0.0546095533678033	0.0132656122438834
Dab2	0.469162890752907	0.285717619282736	0.30713441734914	0.44791185406931
Ddx58	0.166709251811564	0.53872714324037	0.386472582722231	0.252400019044267
Ddx60	0.11236823035003	0.707133190596425	0.923661346862263	0.430699203931706
Dhrs1	0.166709251811564	0.344256131397741	0.247360626363947	0.195018197543034
Dnah5	1.09644403004698	0.631707611938098	0.505834163135553	0.862024364224857
Dnah7b	0.350135845816513	0.209031620818926	0.36879519323865	0.297411441413225
Dpp10	1.84329979098946	1.22574415520927	0.993448764053502	1.84528627014165
Dtx3l	0.0375826599310781	0.408301751359764	0.378192723309305	0.159366132719416
Ehd1	0.279529896701112	0.550125499237415	0.503086167556279	0.390287287314606
Eif2ak2	0.0794049619568558	0.550125499237415	0.548805116808932	0.260151276296374
Emp3	0.00402324526947397	0.0649687285810824	0.0617656747057805	0.0157334418575651
Enc1	0.191979635978286	0.56419313547851	0.538234245065339	0.403754418346823
Epn2	2.43757272231953	1.99413281293202	1.6064535126749	2.29291583557767
Erap1	0.14427950656939	0.573462805304084	0.499410387105081	0.254343473316943
Erf	0.131990280647915	0.251934629759329	0.295913543013052	0.236714896108333
Ermard	0.690006064160797	2.00212434044695	2.73539545233932	1.15004618373931
Etv6	0.729650074554867	1.18753782420411	1.29435530386787	0.974264452765086
F830016B08Rik	0	0.195658769032322	0.57560697405634	0.112749314978763
Fen1	0.0549037157906774	0.192962603985667	0.0801354140477495	0.122395856427555
Fgfrl1	0.399999951316456	0.719169011556118	0.666081201255608	0.613640551022476
Fgl2	0.00201364594618468	0.0680324808726592	0.0885012659461219	0.0165547002077749
Fhit	1.23223601172826	0.803265327320274	1.63436057966767	1.27157634344836
Fkbp5	0.447495277419526	1.20682344407599	1.04169830143763	0.664727246883008
Flrt1	0.790896866993532	0.476656278836889	0.322635076185221	0.662578227708183
Fos	0.250143845824887	0.62296472930019	0.505834163135553	0.556459377177628
Fosl2	0.00201364594618468	0.0695608442260862	0.0815345919792773	0.0255443056611346
Foxp2	1.03464506152425	0.587208161891315	0.675389326795777	0.79534863671514
Fstl4	0.0317416560263259	0.974676140857337	1.10495785671154	0.350527347146958
Fzd1	0.0453179696745141	0.20236754890467	0.236642480348676	0.0870709326242828
Gadd45g	0.0510804366441483	0.821430539776223	0.509486449803579	0.232093338933342
Gas5	0.390496909579313	0.636916884951187	0.61655844261031	0.609565646385919
Gbp2	0	0.558589806345197	0.748327164223192	0.0763027880890558
Gbp3	0.015996764317335	1.0784419285539	0.885601394298926	0.179794503945473
Gbp5	0.00201364594618468	0.16281486072066	0.208718064953313	0.0255443056611346
Gbp6	0.00803036887619405	0.621206942645717	0.963803543897202	0.160788462696907
Gbp7	0.0549037157906774	1.12042607969842	1.18831110636794	0.353462235227715
Gfap	0.0297870484149021	0.434087595677757	0.400799394704268	0.110509912625936
Gli3	0.106949257450042	0.388516424839006	0.526654943767496	0.234076622229569
Glis3	0.0606113657032411	0.721558889557587	0.987815598516452	0.1550869642179
Gm12185	0.00602881420144109	0.102607065164146	0.139919135071552	0.0116170025589914
Gm12216	0.101500759213118	0.451958451730873	0.464753168061132	0.207981966358844
Gm19684	0.00201364594618468	0.0951918768660855	0.197575274516524	0.0496584443374962
Gm20559	0.0868246072889782	0.300373568240974	0.308249610802997	0.190199387847624
Gm2824	0.382278943827434	0.211684864345259	0.209948523128099	0.326732898620759
Gm3417	0.0297870484149021	0.423424181083403	0.547928466293928	0.0140888989875461
Gm3435	0.043389744536101	0.334929824002791	0.762580485346951	0.0977243584339142
Gm3448	0.119548148606522	0.742814598511101	0.874907487780281	0.135600819012053
Gm4841	0	0.117274497766066	0.119937265895759	0.00499524950782628
Gm4951	0.00402324526947397	0.72552937094815	1.4018669376704	0.34699407358359
Gmpr	0.196957975592551	0.0665017780486749	0.0702859664354556	0.142862257263099
Gna13	0.312510866550339	0.521382239155011	0.587479514041684	0.442564658649476
Gpd1	0.325695710966615	0.588117836046927	0.718456920086892	0.222117488672552
H2-Aa	0	0.207702354489762	0.458059097752155	0.0344538175829597
H2-Ab1	0.00602881420144109	0.376229814461754	0.556660579038246	0.160788462696907
H2-D1	0.55374292622962	1.34305745231564	2.08691528240848	1.36426326211893
H2-DMb1	0.00201364594618468	0.0572680282079444	0.0871118085070963	0.0132656122438834
H2-Eb1	0.00201364594618468	0.223538106820081	0.404855350064068	0.0817013544037348
H2-K1	0.334390009188096	1.28362866244277	2.01857025613924	1.01440390503266
H2-Q4	0.00803036887619405	0.302795478596438	0.719934892474728	0.199130204094751
H2-Q7	0.00803036887619405	0.297945777992285	0.883722525038103	0.338700893186948
H2-T22	0.126676882915092	0.371724261189007	0.61655844261031	0.236055979897512
H2-T23	0.0681712406683273	0.671805288000858	0.674616950336641	0.112749314978763
Hdac9	0.961864721515156	0.648967351535842	0.531124402729981	0.801733290339161
Herc6	0.227924652389833	1.01996567457949	0.867926459489468	0.431241608098258
Hip1r	0.917766969994034	0.524294029178245	0.555790791024668	0.743542481290691
Hist1h2be	0.234323529596332	0.0981645536358836	0.121281884364583	0.149352772162539
Hmga2	0.00402324526947397	0.157234448613419	0.371937526103145	0.0646353485324771
Hs2st1	0.901534320357103	1.37129012291552	1.2052707220679	0.997002305961588
Hspb1	0.00803036887619405	0.211684864345259	0.159509538597215	0.0255443056611346
Htra1	0.907245769144313	1.49685426561987	1.08054413998937	0.705941691475194
Icam1	0.0219301875510741	0.171127520426876	0.146492004600004	0.086305613012816
Idnk	0.128451154252804	0.244269748266535	0.224597124218725	0.140689356912071
Ier5l	0.0625066991649973	0.227458169835957	0.115892528341602	0.104513539093622
Ifi27l2a	0.0219301875510741	0.145979323432823	0.482700094733887	0.0669797521926968
Ifi35	0.00803036887619405	0.260803364079765	0.23783907426761	0.0885998169430172
Ifi44	0.00201364594618468	0.117274497766066	0.0815345919792773	0.0181951962777114
Ifi47	0	0.541588935598267	0.540003835216783	0.104513539093622
Ifih1	0.0738038757913952	0.42877010186459	0.36879519323865	0.169984621259809
Ifit1	0.084974850614904	0.586297659475129	0.311587748586498	0.142862257263099
Ifit3	0.097851864555	0.892303619655696	0.344370207472404	0.127551859808665
Ifit3b	0.0510804366441483	0.352345904011503	0.142553469460093	0.0669797521926968
Ifitm3	0.00803036887619405	0.467465927426027	0.302661165205205	0.0809319127103409
Igtp	0.0356394469797369	1.66044663870084	1.20572512181253	0.376636314019882
Iigp1	0	1.31751819781085	1.79880685411932	0.348762270867222
Il15ra	0.0491633015136088	0.161422674446285	0.129311846992154	0.0739801651020477
Il17ra	0.0587124331299577	0.317205039792948	0.384409036126897	0.112003404602751
Il1r1	0.012021499507828	0.255745151091386	0.186306921873871	0.0472730299132436
Il1rap	1.40063565854284	1.9415107018233	1.91683518136967	1.62770280299178
Ints7	0.154694245919113	0.28940179286862	0.313806999157922	0.329137983598169
Iqgap1	0.29465621976878	0.678473119566691	0.784279300339567	0.544910480557325
Irf1	0.0794049619568558	0.72235424801506	0.666081201255608	0.271030383074971
Irf7	0.00402324526947397	0.194311595171964	0.0967977106156628	0.0304138771700087
Irf8	0	0.140303897426822	0.250907964232626	0.0472730299132436
Irf9	0.0491633015136088	0.381833358361374	0.333561692657979	0.171391938711303
Irgm1	0.0794049619568558	1.51068375741394	1.44926562422153	0.437188716949948
Irgm2	0.015996764317335	0.668454625271959	0.614098831243122	0.169984621259809
Isg15	0.0179784863604352	0.535857137516403	0.256792372921993	0.0793912509210441
Jade2	0.0960224121375659	0.329056401101839	0.353998983097328	0.0946920860098474
Jakmip1	0.159861220952009	0.0541710667605495	0.063190774222946	0.138511724781557
Junb	0.0662866231457205	0.457154376357099	0.281135601320448	0.31644625915682
Kcnk3	0.243845721270887	0.0981645536358836	0.0342956100968505	0.135600819012053
Kctd4	0.577782220677905	0.286947185887595	0.287983336749776	0.409312632370957
Khdrbs3	0.749850609122614	0.411561579250369	0.597544977850893	0.812161132143656
Klf5	0.0100279253311543	0.0741319687021493	0.0801354140477495	0.0583566012594961
Klf9	0.826803763942127	1.30472180621944	1.07175267226386	0.685126198488625
Lama1	0.196957975592551	0.0603554280893155	0.0829318149469449	0.131218510856737
Lgals3bp	0.00602881420144109	0.176631151020607	0.0995479665758434	0.0271701323353289
Lgals9	0.00201364594618468	0.168364304564369	0.126642350855645	0.0424850622904462
Lpcat2	1.07052368239897	0.644680264207696	0.55492024582126	0.952608546532902
Lrtm2	0.0587124331299577	0.273338079688636	0.119937265895759	0.0747549723164843
Ly6a	0	0.123081758856627	0.321535819227121	0.00250074381537597
Lypd1	0.379524545311322	0.143145636731962	0.160802020218722	0.362796409584808
Lypla2	0.0643984471324581	0.288175242514847	0.30041701294249	0.124608828187251
Macrod1	0.465373149884298	0.248109532795992	0.163381982705272	0.317661958579503
Map2k6	0.364238228163613	0.1600285472869	0.139919135071552	0.271666659626544
March4	0.0140111072525691	0.141725776514337	0.171082171739393	0.0654174272702605
Matn2	0.130222283126498	0.5567150310034	1.01621860143583	0.227450323759892
Meox1	0.514759085963513	0.237837160217702	0.0843270884061723	0.406537387071811
Mitd1	0.190314666640337	0.363790363449964	0.257965110889098	0.212716043319617
Mlkl	0.0219301875510741	0.216970325228484	0.292522580851456	0.08323846394343
Mov10	0.0681712406683273	0.187548367486825	0.218519596609959	0.126816913514486
Mroh3	0.201911654062373	0.394051730440784	0.905426037466772	0.473187748387431
Mt1	0.675750826539551	1.87773607570709	1.44855317189675	0.595861443454208
Mt2	0.180266212589304	1.06498726322191	0.594201067688932	0.164335462014655
Myc	0.0258663342459704	0.155834466192534	0.142553469460093	0.0622854357255425
Myrip	0.341577957304747	0.154432521072806	0.137277842631471	0.27990162326385
Nampt	0.357211896432548	0.621206942645717	0.504919003406062	0.352289313421013
Ncln	0.081265040713171	0.215651576708878	0.178723520653885	0.162208772524813
Ndst1	0.274947019871381	0.475639289744514	0.599212749107427	0.45163795077348
Nek6	0.163291098311164	0.314817819258989	0.27998973927487	0.18674310833841
Nfasc	1.02239364319728	1.8350218050822	2.06426363431552	1.33548363554766
Nfkbia	0.158141860639254	0.407212776339082	0.259136475152701	0.152940493588917
Nlrc5	0.00402324526947397	0.914854062727585	1.0363311940494	0.419240222685686
Nmi	0.130222283126498	0.379595707354103	0.217299646122835	0.16149886977084
Noct	0.097851864555	0.330233848691924	0.223384570012982	0.153656495846845
Nrxn3	2.87036324586325	3.53455010858508	3.53596130774085	3.09765890275676
Oasl2	0.0100279253311543	0.644680264207696	0.607510136874191	0.143585509423862
Ogfr	0.154694245919113	0.414810815181713	0.311587748586498	0.246546890849278
Olfr56	0.00201364594618468	0.0541710667605495	0.151719370462439	0.0206509053421683
Osmr	0.00201364594618468	0.144563483804596	0.257965110889098	0.0296039268542469
Oxr1	1.61688936317816	2.31541136878128	2.12893203334096	1.74364215942456
P3h2	0.355800686280587	0.72552937094815	1.10646410377828	0.607294614906577
Panx1	0.14427950656939	0.351194221298983	0.440637147051887	0.305437941188051
Pappa	0.015996764317335	0.111433315308006	0.0731100073800698	0.0214681367434787
Parp10	0	0.151622720669896	0.206252597185788	0.0312231719971339
Parp11	0.293153842274729	0.964743074551069	1.01511982429159	0.512945424699672
Parp12	0.137275595335937	0.727904114681641	0.621459590342958	0.258219087389584
Parp14	0.0179784863604352	0.642960269851801	0.554048942108535	0.162208772524813
Parp3	0	0.350041210683923	0.393661645686518	0.106016006765771
Parp9	0.105136387830729	0.630836755374784	0.573899331387306	0.227450323759892
Pde3a	0.190314666640337	0.737347094122325	0.7504781567852	0.314010417532378
Pgf	0.012021499507828	0.0817043801344874	0.0502911700210366	0.0173752846461249
Phyhd1	0.0549037157906774	0.338437390137596	0.283423393918793	0.113494669387163
Piezo2	0.110565166890291	0.535857137516403	1.32223503951444	0.486103528050397
Plce1	0.759328348691234	1.78656861291583	1.91236310750535	1.09071137346449
Plscr2	0.00402324526947397	0.0801944782147023	0.0688709496188947	0.0173752846461249
Pnpt1	0.309557142432577	0.547288067318943	0.377152903853035	0.404868535398776
Ppp4r4	0.421387944292472	0.834308144377673	0.984987071177725	0.613640551022476
Prkg2	0.736429027503689	0.458190329404223	0.438682504864398	0.694755168145095
Pros1	0.23750767880321	0.803265327320274	1.195221329652	0.561708373109498
Prtg	0.299149856711973	0.165593432178447	0.198819511527482	0.273573063794523
Psmb10	0.133755157869967	0.670131360003342	0.385441341702538	0.222785650398154
Psmb8	0.0258663342459704	0.916819607631389	0.814290988689094	0.367431026227545
Psmb9	0.0100279253311543	0.395155124282894	0.533796520916856	0.117213130836266
Psme1	0.196957975592551	0.521382239155011	0.433779118525896	0.274207725065702
Psme2	0.268803662340044	0.703088842261941	0.396726921552423	0.283679623413736
Psmg4	0.15296597102235	0.285717619282736	0.200062202336343	0.18881830921717
Ptn	2.49439732513444	2.21411567862765	1.71259865308677	2.0942496544911
Ptpn2	0.287121658668476	0.491788292261347	0.394684448654464	0.359888828483844
Ptprn	0.213375691711047	0.529128250270113	0.614919374070005	0.271666659626544
Pvt1	0.762154242296051	1.50124217042856	1.90539162590984	1.16421539584394
Ranbp9	1.12170945339757	1.50923699518128	1.90426262771136	1.26782500002623
Rasgef1c	0.00803036887619405	0.241701676292806	0.342217830229564	0.0817013544037348
Rassf3	0.185303060990323	0.0832120056871243	0.115892528341602	0.153656495846845
Ret	0.0140111072525691	0.173883121962677	0.0386834712641657	0.048068800466799
Rgl1	0.176894163853942	0.398458019694471	0.38026912415894	0.235396629229831
Rgs20	0.625272857841767	1.16123109837603	1.29933207783768	0.958386787222752
Rhoj	0.708040604844859	1.67649738252455	1.74039541996829	1.01076549072159
Rnf19b	0.161577630138203	0.517486616525617	0.468558327781484	0.275475840499964
Rnf213	0.227924652389833	1.22958146803096	1.05762892316696	0.55454379961314
Rps12	0.992960532800034	1.42939921597968	1.57398016998176	1.38849719861951
Rsad2	0.0278286128291548	0.317205039792948	0.234244988414142	0.108265484092464
Rtl4	1.05590569447181	0.778018863715027	0.619828542004497	0.823947016779528
Rtp4	0.0831216659992393	0.503731171177537	0.335732761746896	0.137057331067981
Samd9l	0.137275595335937	0.464383611179019	0.38026912415894	0.238031427446926
Samhd1	0.205200525948726	0.387405677445138	0.275393115784235	0.266565075281457
Sbno2	0.135516925787146	0.544442561465907	0.515846028812188	0.254343473316943
Sept11	0.103320225745444	0.240415162941725	0.213630839486418	0.178398970249456
Serpina3n	0.0643984471324581	1.68473090655215	1.89427209344309	0.588938265493317
Serpind1	0.311035095051832	0.130293729394794	0.145180882360485	0.16149886977084
Serping1	0	0.0572680282079444	0.123965709430939	0.0149115084876739
Sh3pxd2b	0.121335102109111	0.347731193472728	0.341139901838682	0.230768961463615
Shisa5	0.168413957107585	0.440431487738138	0.310476273661706	0.174200645887139
Shisal1	0.540916434326672	0.291850389504239	0.340060810264243	0.551663535448954
Slc14a1	0.012021499507828	0.378475001389365	0.460933473776339	0.179794503945473
Slc16a12	0.130222283126498	0.0274523015976873	0.0165490597680001	0.0400824542100697
Slc39a1	0.211745996484643	0.378475001389365	0.476125483055007	0.276109295682688
Slc39a14	0.190314666640337	0.501750570115028	0.663740568895335	0.374342924000922
Slc7a14	0.0775414168588911	0.484755171165528	0.545293894198472	0.278639111368208
Slfn8	0.012021499507828	0.288175242514847	0.269617463556976	0.0931724948095403
Slfn9	0.0278286128291548	0.227458169835957	0.23783907426761	0.14430823886897
Snx10	0.300643259584882	0.921390910420245	1.06654488455527	0.547327524359604
Socs3	0.0297870484149021	0.286947185887595	0.14123716973028	0.119437588813605
Spata13	0.378144495802452	0.689214407548457	0.841468276460576	0.611378765402508
Spry1	0.327150020180405	0.667615202436638	0.490161385609445	0.436110051799064
Spry2	0.276476980308241	0.546340464739238	0.53023210759415	0.453760931893418
Stat1	0.340144495067964	1.57269371644936	1.61915322682574	0.827966544352743
Stat2	0.193641837800529	0.843506573227683	0.777330994324595	0.288069325790844
Stat3	0.581169712656642	1.17497670576527	1.19797210383782	1.09574614675861
Sv2c	0.00402324526947397	0.240415162941725	0.394684448654464	0.129020133941052
Syne2	0.465373149884298	0.902978964906676	1.3814981405392	0.874633353733366
Syt4	0.0453179696745141	0.658334744149341	1.26009821718456	0.498854615220756
Tafa1	1.46786811900789	2.70890912779957	3.43260800624532	1.81435449365041
Tap1	0.0395221041281535	0.711964916154288	0.751909585692042	0.260794510520704
Tap2	0.124899457942366	0.652383837405775	0.532015902384954	0.244588210146248
Tapbp	0.126676882915092	0.491788292261347	0.551430466667767	0.179794503945473
Tapbpl	0.043389744536101	0.264580303783156	0.188821996347408	0.08323846394343
Tgfb2	0.137275595335937	0.392947117775738	0.22095504180433	0.298031156925394
Tgtp2	0	0.210359122544486	0.539119431572173	0.110509912625936
Timp4	0.725755654243951	0.429835865092367	0.449386062467978	0.657834066010777
Tlr3	0.0278286128291548	0.230063033962265	0.172359791656496	0.0464766256045572
Tmem100	1.21084624275618	0.810571056767835	0.514939989956344	0.972372390355568
Tmem176a	0.764033744608454	1.84542016592511	1.57649178319022	1.16317268194289
Tmem176b	1.1803581547157	2.17117333402065	1.75911611251047	1.38306937318021
Tmod2	0.71496712993235	1.1193575864051	0.942752664684892	0.833421810138593
Tnfrsf12a	0.0625066991649973	0.269594134882954	0.0871118085070963	0.0847732144030888
Tnfrsf1a	0.251712198551386	0.715173145311894	0.478008358441051	0.317054293608786
Tor3a	0.0681712406683273	0.262063929675832	0.169802917421271	0.117213130836266
Trafd1	0.355800686280587	0.553896261254299	0.607510136874191	0.419240222685686
Trib1	0.178581609560034	0.599868907817897	0.511307603087519	0.249802857332398
Trim12a	0	0.0741319687021493	0.0815345919792773	0.036065234885225
Trim21	0.015996764317335	0.131729902940658	0.147801410048673	0.0552023819731756
Trim25	0.215002735351612	0.441484901380005	0.346517961935633	0.265925543376533
Trim34a	0	0.0541710667605495	0.0829318149469449	0.0214681367434787
Trim56	0.043389744536101	0.203703920811603	0.236642480348676	0.103008810615153
Trim9	0.779868476689203	1.36921051029813	1.29393945252374	0.929485328585432
Tsc22d4	0.928975051254355	1.32014540558412	1.1597069886855	0.918220006934111
Tubb3	0.391860028540651	1.06329262980947	0.863458477699017	0.453230608999736
Tvp23a	0.124899457942366	0.461291764876351	0.571332387322013	0.288694856065419
Uba7	0	0.0557207463800437	0.159509538597215	0.019014436204915
Ube2l6	0.0199562889472721	0.121633102174172	0.0954197409596062	0.036065234885225
Unc13c	1.37650311380792	0.936907177676359	0.803481573516017	0.907836893066163
Usp18	0.00402324526947397	0.308824715903284	0.177454010495197	0.0824702045117705
Usp53	0.514759085963513	0.861653424051801	0.82032032754038	0.606384756220826
Vcam1	0.00602881420144109	0.0618955608574624	0.0531721633052349	0.0083116069750791
Vcl	0.335831738082003	0.619446060735724	0.572188767685997	0.440417748812942
Vsnl1	0.446205972462426	0.183468365613288	0.107753640174444	0.289944743972592
Vwa5a	0.135516925787146	0.459225210363168	0.520363950250941	0.219440368400258
Vxn	1.00925584020773	0.661719429729865	0.829627633665414	1.31283685378204
Xaf1	0.105136387830729	0.5567150310034	0.444535006753901	0.131950230502917
Zbp1	0	0.136026089328274	0.217299646122835	0.0352598508172725
Zc3hav1	0.290142298869589	0.487775424851023	0.538234245065339	0.34817321909569
Zfand4	0.108758846519411	0.348886869100616	0.252087619332146	0.256283157900143
Zfp281	0.331500300629831	0.551069523577254	0.454213699002553	0.356388534940178
Zfp365	0.21986804269377	0.512595649685806	0.718456920086892	0.324925281228622
Zfp703	0.0453179696745141	0.164205111506661	0.211177469136033	0.102255596445359
Znfx1	0.250143845824887	0.656638095606465	0.509486449803579	0.211365735240874
2010315B03Rik	0.223098479812377	0.20236754890467	0.392637795521493	0.240659301741519
4930419G24Rik	0.23750767880321	0.240415162941725	0.0165490597680001	0.0312231719971339
9630013A20Rik	0.274947019871381	0.215651576708878	0.512216937512879	0.336318725483508
9930111J21Rik2	0.00201364594618468	0.033803597998218	0.405866773673271	0.0622854357255425
A830082K12Rik	0.297654220250859	0.254476589971733	0.402829428729494	0.411527296483736
Adgra1	0.41475320430889	0.384066013463627	0.138599360904477	0.358723424778804
Ahsa1	0.309557142432577	0.312424886263528	0.129311846992154	0.216756061912345
Alk	1.06428497757827	1.09061833719663	0.400799394704268	1.1977769363225
Aplp1	2.11464747730645	1.84049442407715	0.770334071350671	1.03596069857735
Bcap31	0.806315110088528	0.720762898001465	0.360367042163078	0.459048749683698
Bcas1	1.79358568168701	1.65701802273457	2.56080222160095	1.98955301337053
Bfsp2	0.404045199910138	0.215651576708878	0.504919003406062	0.348762270867222
Bmp1	0.206840914511151	0.27458295283999	0.552304053859928	0.327334712373119
C030029H02Rik	0.464106704608712	0.253206417560529	0.0210153102108602	0.148633680677717
C1ql2	0.559519203658179	0.360370757037813	0.0801354140477495	0.335722295824873
Camk1d	2.74257835152218	2.74057332365197	3.98086366595422	3.32964131863341
Ccdc28b	0.29465621976878	0.278308300960398	0.119937265895759	0.222785650398154
Cdh18	1.00040042442707	1.09281638810351	1.55461882201206	0.915550797329718
Cdk8	0.960322834072427	0.837147452619884	1.63436057966767	1.19878420290371
Chgb	0.216627136020816	0.172506270361954	0.0254617019219077	0.158654208377153
Cldnd1	0.679844529620542	0.703088842261941	0.357188081643671	0.437727613519478
Clvs1	0.0199562889472721	0.0210604082506068	0.149109103196565	0.0416848341507262
Cmss1	1.62565396913451	1.52325443092732	2.92291550646001	2.18179076527568
Cmtm5	1.08288552798133	0.925292606284747	0.249726915903261	0.421980485416851
Cnot6	0.55374292622962	0.55577632363955	0.921249099441997	0.78930208348082
Col11a1	0.764972172724009	0.942664265116314	1.72456765897472	1.08902746680146
Cuta	0.533850197624002	0.542541049305336	0.231841734695433	0.413185081763271
Cyp51	0.944771773070157	1.10482005821479	0.438682504864398	0.465357442239142
Dad1	1.0903654429981	1.03053662982162	0.499410387105081	0.790438600626266
Dctn3	0.476699556332587	0.508665579352884	0.276544254012814	0.318269254517741
Degs1	0.848607996603948	0.902315084212985	0.472349063131035	0.703879532085806
Dkk3	0.0775414168588911	0.075651045250072	0.229432691431749	0.120177976560338
Dnajb11	0.580041823194747	0.7286944443756	0.36879519323865	0.473187748387431
Dynlt3	0.290142298869589	0.210359122544486	0.392637795521493	0.323718385144254
Egfem1	1.26689928858508	1.00689199895709	0.552304053859928	1.19297851558177
Emc6	0.418739328327002	0.39735826623631	0.208718064953313	0.298031156925394
Emid1	0.912924782450194	0.765152518885424	0.295913543013052	0.844961188745347
Erbb3	0.412086933514545	0.346574180713243	0.78635441250904	0.410420577519363
Faim2	0.559519203658179	0.449872498902176	0.163381982705272	0.333930869503977
Fdft1	0.710024512439216	0.767435112792483	0.329205362483667	0.286190383806101
Fdps	0.863167887415861	1.04848425065123	0.172359791656496	0.265925543376533
Gabbr2	0.447495277419526	0.377353038033469	0.139919135071552	0.510443726869436
Gm10125	0.372605173182289	0.254476589971733	0.459018141390697	0.4109740901049
Gm10863	0.288633119302002	0.263322908246616	0.858327648215497	0.44470696913679
Gm15564	0.201911654062373	0.209031620818926	0.978165783653369	0.492244344465077
Gm20713	0.175203865861082	0.16281486072066	0.0210153102108602	0.0622854357255425
Gm33680	0.750802435549367	0.471560959043476	0.728757146047483	0.762409899789683
Gm42413	0.159861220952009	0.0996475847719413	0.00906069346755183	0.0312231719971339
Gm42825	0.22952821443642	0.0801944782147023	0.477067363900428	0.18674310833841
Gria1	0.0643984471324581	0.176631151020607	0.0239817669761107	0.111256937429103
H2-Q6	0	0.0432555416334726	0.240227975142176	0.0770757985012701
Hagh	0.302134435530937	0.290626840639428	0.127977989699838	0.169280219133171
Hexb	1.05309692438106	0.905630089064063	2.71682252104256	1.5955582449089
Hmgcr	0.808113490915913	0.946483992107488	0.334647816394945	0.42307449142933
Hmgcs1	1.40460173047127	1.53036735549876	0.772438293510814	0.660424580302002
Hspa5	1.47388773755945	1.95782125606023	1.2232875597055	1.30040912312512
Hsph1	0.764033744608454	0.906953020120375	0.467608394419117	0.63598142199806
Idi1	0.756494446775773	0.795905831143873	0.211177469136033	0.278639111368208
Inpp5f	0.767782184728411	0.781022331671907	0.453250034381534	0.619946470045654
Insig1	0.608961265729126	0.591748280112713	0.260306468927251	0.262079739047673
Itih3	0.097851864555	0.137454059620107	0.00906069346755183	0.0140888989875461
Itih5	0.0375826599310781	0.111433315308006	0.57560697405634	0.0893633834371607
Itpkb	0.406732969683467	0.606139673334417	1.06863125529173	0.473707595187813
Kcnj6	0.487899110734747	0.394051730440784	0.133302776926656	0.287443403983217
Ldlr	0.383653303283129	0.548234772798027	0.241420288914373	0.178398970249456
Leprotl1	0.394580704815579	0.465412105919657	0.234244988414142	0.300506185626073
Lhfpl2	0.549097760302827	0.41804952776254	0.697532613926203	0.542972630371917
Lrmda	1.08629242675132	0.832885461396247	1.38909059909098	0.811790575626157
Lss	0.190314666640337	0.277068059639006	0.118590836993492	0.113494669387163
Manf	0.81080501258388	1.15660691912154	0.544414158801313	0.636864758214771
Masp1	0.165001635532322	0.186190215624671	0.0488475548430588	0.12828626635345
Mill2	0.0297870484149021	0.033803597998218	0.255618258025613	0.0512455652506313
Moxd1	0.00602881420144109	0.0432555416334726	0.535573974481166	0.0817013544037348
Msmo1	1.03321148441414	1.12575148779589	0.325925615407494	0.355803959655168
Mthfd2	0.139031177395226	0.226153188852249	0.0688709496188947	0.106016006765771
Ndst3	0.630651460021617	0.954710351716041	1.64407881339577	1.02374232447871
Ndufs8	0.550261076247042	0.53009229643852	0.209948523128099	0.39704352311168
Neat1	0.764033744608454	1.12255964733866	2.16491156454344	0.940625155194468
Nsdhl	0.369823962681796	0.420202856757065	0.147801410048673	0.126081426676958
Ntsr2	0.186976388446935	0.37285255406186	0.067453927692143	0.0685396400629423
Pcgf3	0.235916871550007	0.23525249421398	0.404855350064068	0.317054293608786
Pgp	1.03321148441414	0.832885461396247	0.437703749166371	0.805470014804264
Phf21b	0.142533122275258	0.124528319968295	0.267297829900286	0.210013601364557
Plekha7	0.216627136020816	0.184830216677129	0.466657557825278	0.311568628092633
Plscr4	0.186976388446935	0.166979828087823	0.347590111821949	0.197761413118021
Pou3f1	0.636001287538525	0.7286944443756	0.375070015634762	0.51991706557595
Ppa1	0.300643259584882	0.517486616525617	0.222170543734389	0.306052703985518
Prune2	0.564116322148581	0.53009229643852	0.824984808807227	0.636864758214771
Rab5if	0.438435038002311	0.487775424851023	0.22095504180433	0.378924456433574
Rabac1	1.03033814999372	0.857494822532735	0.323733126104186	0.53567206209197
S100a2	0.226318514801414	0.32077521919492	0.678472880765779	0.394796512556847
S100a3	0.0960224121375659	0.141725776514337	0.388531879860462	0.211365735240874
Sc5d	0.64767112323974	0.681790436632744	0.235444452877184	0.256928884244264
Scd1	0.293153842274729	0.369463849112018	0.118590836993492	0.0992370535981195
Scel	0.173510705922694	0.0832120056871243	0.475182714233626	0.16149886977084
Sel1l3	0.128451154252804	0.20102938871779	0.541770299449704	0.177700472403477
Shisa9	0.718903709711812	0.460259021450609	0.186306921873871	0.654803293187134
Slc38a3	0.147763152128723	0.255745151091386	0.0981737840839359	0.172094855429786
Slc4a4	0.4965239771957	0.565123978736995	0.139919135071552	0.212716043319617
Slc5a7	0.0643984471324581	0.0258581544570201	0.114540638768927	0.100747463971422
Sorcs2	0.284091866548505	0.420202856757065	0.217299646122835	0.28116254323282
Spata6	0.0923534358953272	0.117274497766066	0.320435352573272	0.14430823886897
Sqle	0.779868476689203	0.951554370802584	0.34973096922846	0.354633782900447
Sugct	0.168413957107585	0.0922103369352504	0.260306468927251	0.103008810615153
Sys1	0.700065379747551	0.711161248041375	0.386472582722231	0.433408287520251
Tac1	0.293153842274729	0.121633102174172	0.0045406087194372	0.139964006305642
Thsd7b	0.712004491935928	0.573462805304084	0.192582787185488	0.622636881259584
Timp3	0.764033744608454	1.15092595071532	0.705805169565157	0.654803293187134
Tkt	0.690006064160797	0.742035354294884	0.38750276137934	0.524373304512325
Tmed4	0.365637589555609	0.401750041891187	0.197575274516524	0.272302531587685
Tmem121	0.552583656078212	0.427703201573608	0.159509538597215	0.374342924000922
Tmem60	0.344438732024907	0.312424886263528	0.121281884364583	0.178398970249456
Tmsb10	0.200263152951015	0.333757895948793	0.759746027376053	0.452700004714448
Tnk2	0.267261907783491	0.223538106820081	0.398765231256609	0.365116402862702
Trpm3	0.466637993304696	0.654087713146122	0.160802020218722	0.210689896835951
Txndc15	0.744120546280422	0.660874331737787	0.309363561985659	0.527825591002466
Unc5b	0.246999741836304	0.260803364079765	0.0401418235411018	0.100747463971422
Usp20	0.126676882915092	0.0951918768660855	0.219738060631123	0.145030446353441
Vegfa	1.29820229194653	0.610594838118396	0.169802917421271	0.251102281344216
Xbp1	0.453916984851425	0.58993470559443	0.263808259292357	0.329738352110377
Zfp488	0.190314666640337	0.172506270361954	0.30041701294249	0.229442827691943
mt-Atp8	0.823270540314194	0.839271655816029	1.43852517265336	1.1270575486362
4930599N23Rik	0.0700523130878436	0.155834466192534	0.109114729964	0.0464766256045572
8030451A03Rik	0.0643984471324581	0.277068059639006	0.0829318149469449	0.0320318123957318
Abca1	0.497750050831799	0.411561579250369	0.883095449987087	0.858847117622621
Acsl3	1.30149879572914	1.41478770302395	0.920040790115249	0.783218746915364
Adm	0.15296597102235	0.140303897426822	0.0372229890893465	0.019014436204915
Aff3	0.316925158461532	0.232661130396559	0.203781035860386	0.491223490214472
Agt	0.0258663342459704	0.101128419783168	0.0239817669761107	0.00582537052819527
Aldoc	0.998916867672482	1.22381996277133	0.869199367629141	0.631109075772021
Arl6ip1	1.89217941525233	1.90368719837754	1.34660013266555	1.38013444900813
B3gat2	0.835582589886228	0.56419313547851	0.749044675952106	0.948737753387721
Baalc	0.123118868103961	0.173883121962677	0.106390695294242	0.08323846394343
Bhlhe40	0.185303060990323	0.304004237701122	0.173635781343539	0.158654208377153
Caprin2	0.15296597102235	0.0771678177040889	0.130643927478936	0.196390745984194
Ccl2	0.00402324526947397	0.41804952776254	0.106390695294242	0.00748354812200834
Ccl5	0.0179784863604352	0.0981645536358836	0.153021953472973	0.00665480301917901
Cd81	2.40935208813798	2.68562992811005	1.95556489701472	1.89705976909361
Creld2	0.250143845824887	0.33726956789501	0.156919553006586	0.166457638292813
Crem	0.262622330557376	0.420202856757065	0.317126667739169	0.219440368400258
Cux2	0.498974623051996	0.387405677445138	0.532015902384954	0.603650202536448
D030068K23Rik	0.271880058703514	0.294293005156408	0.183785505847898	0.152223978304405
Dcx	0.365637589555609	0.239126992341739	0.447448463195628	0.60136568168246
Dexi	0.285607910063088	0.459225210363168	0.358248858411994	0.266565075281457
Dhcr24	0.312510866550339	0.433026356568879	0.230637938499597	0.140689356912071
Dhcr7	0.284091866548505	0.351194221298983	0.106390695294242	0.147914071728205
Dlg5	0.251712198551386	0.420202856757065	0.424891974893405	0.214738092833372
Ebp	0.232727644852002	0.277068059639006	0.137277842631471	0.119437588813605
Gas2	0.378144495802452	0.260803364079765	0.273086856326157	0.439880300389006
Gja1	0.0258663342459704	0.0680324808726592	0.00906069346755183	0.00250074381537597
Gm20319	0.0472424839150418	0.0695608442260862	0.0401418235411018	0.0239158313694145
Gm32036	0.0336924505986187	0.0526189819063069	0.0239817669761107	0.00913898071396146
Gm37459	0.161577630138203	0.227458169835957	0.0269394498964377	0.0271701323353289
Gm44866	0.0831216659992393	0.0801944782147023	0.0105628594974883	0.0083116069750791
Gm48342	0.0395221041281535	0.0526189819063069	0.0045406087194372	0.00665480301917901
Gm48747	0.0643984471324581	0.195658769032322	0.0646138457212637	0.0567807352532336
Gm48972	0.00201364594618468	0.0306329921602234	0.067453927692143	0.00083427632248133
Grip1	1.09846204242795	0.990001690424301	1.04437109145006	1.31664711334339
Hsd17b7	0.223098479812377	0.319586575074287	0.138599360904477	0.12828626635345
Idh1	0.451353248351788	0.553896261254299	0.40384290244135	0.330338360396492
Ifi202b	0.00201364594618468	0.0463864400593112	0.031359636390448	0.00083427632248133
Jag1	0.23750767880321	0.115817397731317	0.103659219986432	0.255637014324079
Kif26b	0.38502577646703	0.211684864345259	0.0954197409596062	0.363376912696439
Laptm4a	1.32051478524047	1.40157321180279	0.991199304310694	1.03031708074223
Lingo2	0.365637589555609	0.245551315357419	0.445507102342724	0.437188716949948
Mfsd2a	0.595717673280348	0.644680264207696	0.242611182767261	0.26272173441179
Mpped2	1.25087249548976	0.924643379893069	1.20299562098784	1.33372583518203
Mtcl1	0.350135845816513	0.236545662277902	0.35079968165473	0.428526640446659
Nap1l5	1.00040042442707	1.06102864210216	0.68461160955617	0.698497930744893
Nr1d2	0.556057442583674	0.364927638579742	0.486437699013216	0.600908150559046
Ormdl2	0.181947982503214	0.230063033962265	0.107753640174444	0.0999925439521806
Pak1ip1	0.348714607331987	0.415891551934295	0.219738060631123	0.270393701417775
Phlda1	0.89496675508497	1.46898483476283	1.0096077556097	0.87949423187849
Pim3	0.308077002235843	0.388516424839006	0.262642357810698	0.186050416616772
Pithd1	0.206840914511151	0.350041210683923	0.213630839486418	0.162208772524813
Plod3	0.227924652389833	0.379595707354103	0.249726915903261	0.201179883979477
Pmvk	0.347291346053417	0.41264583137666	0.198819511527482	0.200497124043496
Ppp1r3c	0.0662866231457205	0.121633102174172	0.130643927478936	0.0472730299132436
Rab4b	0.239095959407576	0.396257301988788	0.207486090885772	0.167869924582987
Sacs	0.390496909579313	0.304004237701122	0.525758649837829	0.566929960885773
Sat1	0.358621117876571	0.612371361269867	0.499410387105081	0.298650488628087
Sdc4	0.0375826599310781	0.0817043801344874	0.0210153102108602	0.0083116069750791
Sdf2l1	0.288633119302002	0.373979575324521	0.142553469460093	0.169984621259809
Selenok	1.39014925651637	1.42428973405866	0.868563116096182	0.992062718831606
Slc25a5	0.560670466063837	0.802531810222697	0.482700094733887	0.622188981750711
Socs1	0.0356394469797369	0.133164016849711	0.0745190427693241	0.0352598508172725
Ssr4	0.672669513870968	0.798856132252437	0.310476273661706	0.46849692616606
Stard4	0.168413957107585	0.249386191514806	0.0912744024262433	0.0817013544037348
Susd4	0.676775824481921	0.484755171165528	0.483635806277398	0.791951950340626
Tigd2	0.29465621976878	0.495785120906818	0.268458319316018	0.210013601364557
Tmem178	0.14427950656939	0.0726105810494781	0.156919553006586	0.240659301741519
Vps37b	0.232727644852002	0.125972791563163	0.200062202336343	0.274207725065702
6330411D24Rik	0.239095959407576	0.134596077021002	0.0372229890893465	0.192955836111617
A2m	0.012021499507828	0.0448222161615105	0.0617656747057805	0.00083427632248133
A930003O13Rik	0.0719298537164275	0.143145636731962	0.311587748586498	0.116470543880301
Abcg1	0.444915003051834	0.28940179286862	0.185047008553021	0.525360888831677
Adam12	1.7100469438496	1.52003703397519	1.10996988225661	1.64750175466049
Adcy1	0.110565166890291	0.115817397731317	0.0787342756740098	0.216756061912345
Alpk1	0.0239001975536225	0.0862204550740044	0.127977989699838	0.0464766256045572
Arsj	0.246999741836304	0.41264583137666	0.405866773673271	0.230106114406611
Birc3	0.0179784863604352	0.0432555416334726	0.107753640174444	0.019833005527409
Btbd11	0.331500300629831	0.262063929675832	0.125304925694189	0.305437941188051
C1qtnf1	0.00803036887619405	0.0463864400593112	0.111831364422744	0.022284700822945
C2	0.0100279253311543	0.0210604082506068	0.0871118085070963	0.0149115084876739
C230035I16Rik	0.0510804366441483	0.0877212925226974	0.172359791656496	0.0559918700130568
Cdh4	0.271880058703514	0.209031620818926	0.135954575636697	0.356388534940178
Clca3a1	0	0.0495075665471845	0.267297829900286	0.0368699708316324
Cp	0.826803763942127	0.852621161599297	0.975309790227506	0.704704906211798
Dipk1c	0.137275595335937	0.0726105810494781	0.0210153102108602	0.0931724948095403
Fam189a1	0.781715008661507	0.521382239155011	0.352933686159608	0.7084106825262
Fas	0.0179784863604352	0.0603554280893155	0.111831364422744	0.0320318123957318
Fstl5	0.601257167430353	0.446735388399886	0.281135601320448	0.68470543705318
Galntl6	0.105136387830729	0.112896812730327	0.0688709496188947	0.236714896108333
Gbp10	0	0.019456030651913	0.0660348949645646	0
Gbp9	0	0.0146273956320694	0.149109103196565	0.0165547002077749
Gm16223	0.0587124331299577	0.131729902940658	0.267297829900286	0.0901263673423304
Gm26673	0.176894163853942	0.367198315994423	0.714009851135418	0.307281096940938
Gm36107	0	0.033803597998218	0.182522409743411	0.0083116069750791
Gm39469	0.215002735351612	0.264580303783156	0.410908603724312	0.201862178072369
Gm50237	0.00201364594618468	0.0416864087844654	0.155622040350591	0.0173752846461249
Gm813	0.00402324526947397	0.0463864400593112	0.103659219986432	0.00748354812200834
Gnaz	0.175203865861082	0.373979575324521	0.537348274309094	0.230106114406611
Gpr158	1.20904293695312	0.85540901850449	0.515846028812188	0.97363416297827
Grik1	1.24971783548328	1.32885324765054	0.894323074324032	1.46386629130969
Grm7	2.09027171054312	1.73939263386552	1.38378193699435	1.98497694516091
H19	0	0.036964182859033	0.0560448803053404	0.00416443881399675
Hs3st3b1	0	0.0353851390901886	0.0898887954716168	0.00748354812200834
Hs6st2	0.373992883126087	0.41912677186291	0.190077165454798	0.394233970115766
Hspb8	0.0140111072525691	0.0588129196529102	0.0954197409596062	0.0304138771700087
Il18bp	0.0297870484149021	0.0847173617261019	0.117242592775969	0.0328397994233421
Il4ra	0.0297870484149021	0.0862204550740044	0.0954197409596062	0.0239158313694145
Impa1	0.416083678561041	0.577146746803719	0.627147400197965	0.392544441572609
Kctd12	0.012021499507828	0.0290439114774791	0.0731100073800698	0.0181951962777114
Kirrel3	1.09778982401878	1.24384165556477	0.851876868188519	1.20154896593261
Ldb2	0.592379187422082	0.414810815181713	0.261475095415929	0.518924087684485
Lgals1	0.135516925787146	0.42877010186459	0.921249099441997	0.402639058653488
Lmcd1	0.531483645727049	0.258277455771995	0.169802917421271	0.50944129272523
Lpo	0.0297870484149021	0.0588129196529102	0.0787342756740098	0.019014436204915
Ly6e	0.139031177395226	0.352345904011503	0.362480748693663	0.155801431794569
Mctp1	0.128451154252804	0.408301751359764	1.17293841091587	0.227450323759892
Micall2	0.00803036887619405	0.0242614619530232	0.142553469460093	0.0231005986695003
Necab2	0.0549037157906774	0.0603554280893155	0.0120627724087786	0.109014186794175
Nrp2	0.348714607331987	0.233957651700839	0.179991421199734	0.363376912696439
Plppr1	0.792723165053597	0.528163273819784	0.429839024451564	0.838125753693617
Plxna4	0.354387481799784	0.407212776339082	0.224597124218725	0.481988600080609
Pou2f2	0.245423975033796	0.203703920811603	0.167239488817917	0.321905305493442
Ptgfrn	1.0767237069718	1.42310690612014	1.63110006693322	1.08790328499248
Ptprr	0.678822673878546	0.476656278836889	0.375070015634762	0.653067289914175
Rnf150	0.410751127495059	0.314817819258989	0.192582787185488	0.415391195720104
Robo2	0.149500434532441	0.38962593984185	0.551430466667767	0.171391938711303
S100a11	0.00201364594618468	0.0258581544570201	0.0885012659461219	0.0140888989875461
Sapcd2	0.268803662340044	0.172506270361954	0.0843270884061723	0.271030383074971
Serpina3i	0	0.033803597998218	0.0702859664354556	0.00083427632248133
Shank1	0.099677976187164	0.138879993720061	0.0829318149469449	0.211365735240874
Siah3	0.168413957107585	0.0937022180978013	0.0459540573298188	0.146473298452376
St3gal6	0.610057021997078	0.939469975931012	1.27716198167484	0.656536287974716
Tafa4	0.099677976187164	0.144563483804596	0.0488475548430588	0.1550869642179
Tgm2	0.0179784863604352	0.0226622159443688	0.160802020218722	0.0083116069750791
Tgtp1	0	0.0274523015976873	0.0731100073800698	0.00416443881399675
Tln2	0.921784292282422	0.71677340835252	0.537348274309094	0.982734709784912
Tnfaip3	0.0179784863604352	0.0416864087844654	0.212404906689297	0.0392803003519778
Trpc3	0.0756743924757807	0.0526189819063069	0.0165490597680001	0.111256937429103
Tspo	0.0278286128291548	0.0463864400593112	0.0898887954716168	0.0165547002077749
Vstm2b	0.426664223173373	0.269594134882954	0.118590836993492	0.335125510225596
Zfp385b	0.0278286128291548	0.101128419783168	0.336816531268026	0.0416848341507262
Zfp423	0.206840914511151	0.166979828087823	0.105025890259716	0.241970653771238
Zfp521	0.947901392298176	1.38818175670619	1.61975397077505	1.08734071981326

## Sheet: DGE_ACC_MOL56
Pseudobulk aggregation of the accessibility of differentially expressed genes in MOL56 between timepoints, normalized by the total number of counts multiplied by 10,000 and natural log transformed
	Ctrl	Early	Peak	Late
0610009L18Rik	0.689948519723561	0.647183434404139	0.650852889349392	0.662880403255603
1110020A21Rik	0.828473099323972	0.794183440214073	0.770365133208076	0.768333258089964
1110038B12Rik	0.266888415506215	0.273427097152252	0.214832735899268	0.256864762827908
1700056E22Rik	0.740938224936035	0.689286173012208	0.635350735947582	0.694758620641801
1700063D05Rik	0.669315240020038	0.602446944867805	0.567482595191391	0.637407804601041
2310002F09Rik	0.321157952849973	0.462195201489318	0.57134712819234	0.610926976996003
2700046A07Rik	0.0810096952482935	0.101973246198401	0.139709156518413	0.100729057910934
2810410L24Rik	0.701567749533978	0.684126775077624	0.680054124099674	0.652333115760912
2900052L18Rik	0.43728890564094	0.45494115985586	0.46000399182747	0.385662390892148
4632428C04Rik	0.0657280369045046	0.23069356292302	0.205776761902299	0.138681082023621
4930426I24Rik	0.525155313690526	0.504072014572634	0.476427902249835	0.472271526374927
4930440I19Rik	0.326449089586043	0.259223543568521	0.249653708021311	0.257042171950783
4930461C15Rik	0.640350579017993	0.606631590007551	0.567658580156816	0.593656884591376
4930563E22Rik	0.404279940381162	0.39060633611075	0.331800085101082	0.40611950993895
4933439C10Rik	0.27300851971643	0.222591464867185	0.253395365843996	0.281227619251569
5830418P13Rik	0.410789612654158	0.393144122570192	0.364562573591352	0.451348790644547
6820408C15Rik	0.215906179632586	0.216561525856962	0.192421365183299	0.196860256231324
8030451A03Rik	0.488774784943371	0.476066033513242	0.454698734870917	0.469514163942178
9130227L01Rik	0.021041947566172	0.0243199253116304	0.0373228390909429	0.0200974647230768
9330111N05Rik	1.07372680801417	1.03814448724951	1.03433722587252	1.03704769067888
9330175E14Rik	0.0733868040211452	0.276799812618539	0.342987485867704	0.302852856603597
9530051G07Rik	0.113011923215775	0.110975896668856	0.108868349535673	0.105591281927931
9530077C05Rik	0.393112037120376	0.470663634935459	0.501932188581429	0.389903930398984
9930111J21Rik2	0.000145307599393622	0.000804383178316319	0.0024803879242714	0.00297759781430007
A2m	0.00391591303519557	0.00532072770977632	0.00865457410868813	0.00372061400104294
A330102I10Rik	0.0590609230954377	0.0488006748336852	0.0612580046550176	0.124604665700009
A830052D11Rik	0.951573176438471	0.920906932266019	0.871928058571305	0.907544308150836
AU020206	0.0760165381585515	0.123197327383625	0.181218724320059	0.148121322737001
AW011738	0.104561636551926	0.114118409921961	0.1468375304613	0.156149635256317
AW112010	0.0012828205544042	0.00172713702170094	0.00340894954143583	0.00131810804884474
Abca4	0.284171842700879	0.3212627814458	0.343097628856324	0.287226708060605
Abcc4	0.229629262596487	0.278786421989526	0.379222914108897	0.347102446670771
Abhd15	0.326781041448272	0.348722161862456	0.483439673205994	0.369108881909542
Ablim1	0.190627761759907	0.189041603975104	0.293770993645809	0.236385700647397
Acads	0.197728234812471	0.137611437398731	0.149647984495289	0.21510855037924
Acsl5	0.0341649342419523	0.0733613298621067	0.114282692844915	0.0679457250038336
Actl6b	0.123384362972491	0.125434518122495	0.118703439990121	0.104507089367841
Ada	0.461639761742512	0.50854488087594	0.537921875951089	0.52465893389314
Adam9	0.975971792241531	1.06534845344977	1.10401913572936	1.03513489541838
Adamts17	0.444007431858766	0.434750645317911	0.53183045362439	0.536566946844958
Adamts2	1.24706003680914	1.2341508251107	1.21629450429413	1.19972998973507
Adamts9	0.205804333736961	0.232608498135594	0.280492762730058	0.237923831554392
Adamtsl3	0.293985230025027	0.364288271728526	0.444699747681198	0.443687534434379
Adar	0.297750714253487	0.418546616725222	0.507647503241258	0.377321587008467
Afap1l2	0.826503817675694	0.873745681194391	0.964238723196749	1.14502979549704
Ago4	0.228261542523001	0.204245681144533	0.241152947774578	0.223765514781691
Agpat2	0.135301751873573	0.100330108090836	0.0951322687488951	0.141522523402838
Ahr	0.140892104532793	0.168075636145065	0.17015105749651	0.153152716628947
Ahrr	0.182326743024067	0.172349297962151	0.219579417868389	0.201793490372722
Akr1b10	0.0172640737307861	0.0198011113256325	0.0283105311692739	0.0211086578794843
Aldh1a7	0.0365028196718241	0.0287315357366816	0.040905142493117	0.0321092823254874
Aldh1l1	0.843203764449788	0.900890585625366	0.981255309589002	0.886285449047818
Aldh1l2	0.329397852286414	0.460729795898908	0.437209530194496	0.486439159888724
Alpk1	0.0938587743143569	0.111509221565542	0.140248923367358	0.116981420546784
Amotl1	0.147998275737277	0.283488861918292	0.374324392532703	0.347588675172028
Angptl1	0.0219427264765042	0.023330448435934	0.0358264168762621	0.0351036692764038
Angptl4	0.0913419230729978	0.107529100234003	0.129534206538181	0.126274009191905
Ankrd13a	1.0480824888592	1.12594129965238	1.18352094385943	1.0881104685322
Ano3	0.0582386807593058	0.0861302967398902	0.127759972443417	0.0781804896383965
Apba2	0.457371887040097	0.604549597630885	0.774952426364572	0.797738081206731
Apobec3	0.119222491746541	0.168151212234993	0.197147931636422	0.158501568157738
Apoe	0.182548731082537	0.116826884742049	0.158164781867923	0.301878042950069
Apol9a	0.00111348571537306	0.00401546114037031	0.0101921826484843	0.00297759781430007
Apol9b	0.00171812137561539	0.00549858667550246	0.0137197356694356	0.00366347850587471
Aqp4	0.00321604213618233	0.00368887811779725	0.00711459768752845	0.00788271243670331
Arhgap27	0.435096805300038	0.612076285367501	0.77387916603355	0.454593504305503
Arhgap28	0.103339241652964	0.153253629447816	0.212576419288888	0.194030299922223
Arid5a	0.61440758428148	0.623484855008162	0.600205401609751	0.613445380157087
Armcx6	0.116402326843216	0.106591870307679	0.0812048771358629	0.112071867710485
Arrb1	0.388557169704498	0.563721221771229	0.629330152434305	0.613165870581895
Arrdc2	0.886925364808739	0.845024316966461	0.82311714859031	0.823664063416242
Arrdc4	0.406266336159197	0.423261752169116	0.391784955515366	0.424554952782744
Atf3	0.432758493523921	0.458339210759546	0.366070608383388	0.494025928726459
Atp10a	0.0500479719716991	0.0553642727927661	0.0879085509881046	0.0822558081400743
Atp8b5	0.324752668553972	0.418997569766319	0.481331707683784	0.513705905018365
B230206H07Rik	0.496219478513512	0.506966393719351	0.522945257539504	0.492975646546726
B2m	0.170306468280759	0.27399378378168	0.402116804094765	0.368077535019904
B3galnt1	0.0709983242863156	0.156419191289172	0.197147931636422	0.100210406007726
B4galt5	0.514266496597056	0.455338194623214	0.472371339470928	0.564932714837653
B4galt6	0.321509226213896	0.434403259545468	0.433895977128817	0.346575432199416
BC055402	0.170429023019741	0.181438999698347	0.158959525244215	0.15354626722726
BE692007	0.0138302431449116	0.0135284833768948	0.0195207408897662	0.013725953125561
Bace2	0.161854913184486	0.199178875590443	0.270239414110071	0.277715078577914
Baiap2	0.874325709249868	0.862260303505366	0.818951360046804	0.883824128089487
Bambi	0.478486384884429	0.475658623037831	0.455486477076395	0.463255095519574
Batf2	0.685675228256489	0.669647069203825	0.671208427931005	0.674895733979131
Baz1a	0.283314729207188	0.282096185189064	0.307331914705368	0.315314205624203
Bcat1	0.768852611101938	0.869032372887395	0.953050532539658	0.83711199512898
Bcl3	0.379716125132717	0.679016192759187	0.760474146521528	0.73553967174874
Bcl6	0.775454645670387	0.831166376165135	0.795969174106603	0.80806658707037
Bdkrb2	0.343342783649367	0.277590414096458	0.282601082572592	0.307881336172132
Becn1	0.280281584236407	0.410552653331294	0.3991013420258	0.29583849242573
Bfsp1	0.402338183249824	0.345478387077693	0.418592307677036	0.434334158697358
Bfsp2	0.964322534942483	0.897531422574051	0.885017329003798	1.08161810391651
Bid	0.211368071723977	0.240255217444507	0.303672512404265	0.302725760873749
Bmf	0.868204753930138	0.792106920949808	0.794637812598331	0.872217223356564
Bmp6	0.0838422288229088	0.0702545824455865	0.101463089181264	0.0773846599517085
Brip1	0.403374256240802	0.390787820310444	0.381769170541782	0.405125654744804
Bst2	0.0619334587679366	0.149154170363917	0.229992811874986	0.140476615677343
Btbd11	0.303899867310083	0.268517504764828	0.331242988676727	0.346980852596137
C1ql2	0.0959733258120417	0.129841591933343	0.109146722445596	0.0991722945036645
C1ql3	0.220812281116553	0.239880128890787	0.253033881173372	0.184824908406662
C1qtnf1	0.469773074789687	0.560084952625541	0.512121947466115	0.503290493136976
C1ra	0.0170736143872234	0.03485224902726	0.0404580557386801	0.0270428103465419
C230035I16Rik	0.213307111479101	0.249749529376378	0.26929127793714	0.209078219551389
C4b	0.0803617694790252	0.300183891338035	0.545326904251325	0.468509598643371
C77080	0.708222175975365	0.574819778969132	0.593540195521136	0.737379358449647
Cacng5	0.168404946672538	0.321068229311752	0.336578345972764	0.269120382801554
Cage1	0.26087990166208	0.264293281049872	0.229746129967389	0.246475987748846
Capn1	0.18958638111176	0.207665848408114	0.262151456494149	0.227243977375064
Casp12	0.00336088320464886	0.00517248773646627	0.00819283014157275	0.011914230722455
Casp4	0.00394003778027779	0.0087832844149866	0.00957742291226165	0.00862209431156412
Casp7	0.264939141126025	0.332482530188109	0.390945378408029	0.425379795442322
Casq1	0.374966525519081	0.374874174537029	0.379647740673472	0.364100873530992
Casz1	0.413644341919964	0.523364554437412	0.643621264043921	0.518600115365038
Ccl2	0.166868823368953	0.177553525890786	0.166083935122246	0.191807893413175
Ccl7	0.00198404529288834	0.00253013267626058	0.00279000427617234	0.00189065703572975
Ccl8	0.00053269133730556	0.00258958819317795	0.00340894954143583	0.00297759781430007
Ccrl2	0.0308122330216292	0.0432788801555565	0.0662095139631463	0.0559797043171579
Cd274	0.0785274284859563	0.205289951140934	0.275320301246323	0.229389092447304
Cd300e	0.0207810442689065	0.0183097998711722	0.027102729931827	0.0208840366378241
Cd38	0.103077105370795	0.148897395315004	0.161472053762095	0.163140190616554
Cd59a	0.0428575578274593	0.0546872742395415	0.0649012044656937	0.0599843084852618
Cd59b	0.0197604959205393	0.0281521714157345	0.0359761599055247	0.0303305905132471
Cdca7l	0.13692934211519	0.157132610845955	0.161075758180011	0.187062870844636
Cdh22	0.522688362228746	1.02218697243807	1.31435386696298	0.749214863414669
Cdh24	0.236554655434806	0.248239274253357	0.22442769691592	0.249608436175978
Cdh8	0.694977540123255	0.621917872451264	0.578683657324298	0.614934779869297
Cdk6	0.329415274734464	0.385024767583618	0.41007952935269	0.353042516905957
Cdkn1a	0.380262707049026	0.64250724690603	0.615335297027895	0.432065846635695
Ceacam1	0.0642755285089131	0.0797111545597648	0.117047949161393	0.0635963173343905
Cebpa	0.202011939998522	0.2024946906503	0.187286306781889	0.208380066297956
Cebpb	0.156919254034278	0.324736723295363	0.396285645290411	0.310070741140132
Cela1	0.271292753917821	0.350948791858334	0.353179235177203	0.435336525298093
Cemip	0.119759788593134	0.142611565163484	0.193189354683002	0.134378656330205
Cenpj	0.326256856552151	0.308909586924651	0.30252619748364	0.345601752109145
Cers1	0.240180425729782	0.285126144075007	0.318456248447452	0.337655258748675
Cers6	0.201338868772664	0.263217251303759	0.270476307757019	0.270171412353412
Chil1	0.109371198923946	0.119660265871227	0.131033026729724	0.12227304259085
Chl1	0.142594636338342	0.303797695166069	0.293539555215128	0.229115504052158
Chrnb2	0.0760614308160848	0.0621091691653398	0.0554011357061004	0.0743547178256531
Chst2	0.281287561375982	0.29362817462395	0.379116679262136	0.314225827319206
Chst4	0.284190071178927	0.247867169059698	0.247959327178734	0.281054449744064
Ciita	0.107023714450719	0.221756144498891	0.346066913089271	0.208985160608052
Cklf	0.223779284699086	0.193521545953186	0.179014968727954	0.212329838775091
Clcf1	0.177308796936354	0.172499799908625	0.15324985790371	0.182151844515848
Cldn14	0.364777075038308	0.483573341682587	0.619688004137874	0.552600951778467
Clec2d	0.0265760070994054	0.0734444137267221	0.0586266577789715	0.046828194591958
Clrn1	0.0137346904427843	0.0158779985155047	0.0307217660826472	0.0218383286576447
Cmpk2	0.0902802982032904	0.206284635868381	0.263821980230872	0.207122160832053
Cnih3	0.989847911147835	0.908729072327082	0.893755127011281	0.990142072209602
Cnksr2	0.407894496524353	0.361904410901869	0.322286976961179	0.34198272256099
Cntn3	0.198026307979128	0.289910457738133	0.477968941302762	0.304038305114708
Col16a1	0.846117800979757	0.955051090819984	0.904115552565981	0.978333169659596
Col23a1	0.502305610044205	0.574215737856448	0.69982960447298	0.645108918917962
Col5a3	0.37994804485762	0.493629632559284	0.483918137206381	0.365056715504155
Col7a1	0.0627526699483818	0.133447214889613	0.113174445700119	0.202074655740724
Col9a1	0.39657164313134	0.378412076079661	0.380815083994063	0.417251735936681
Cox6a2	0.0122763792954458	0.0192165483442905	0.0204336207004865	0.018184638889012
Cox6b2	0.155386106104315	0.100276188971697	0.101042279119063	0.177072469708474
Cpne8	0.141375834239186	0.158252671410881	0.176155821481687	0.208286942359504
Creg2	0.46509880146749	0.410453806076237	0.411417651688569	0.409894789474712
Crip2	0.444908112963725	0.45043038081607	0.498449539479652	0.480959259197484
Crtac1	0.958878415554222	0.89225774577474	0.888853501910249	0.983601177137739
Csf1	0.78414955935286	0.820530628839248	0.830788549255605	0.832757482175846
Csrnp1	0.0822150601997669	0.104419477789493	0.0833492339439805	0.095790970046969
Csrp2	0.290966221471416	0.261314196184484	0.25712307583522	0.29635029034033
Cstb	0.329136479134104	0.31729942912739	0.320035384832976	0.343692211316085
Cthrc1	0.0853333309422582	0.0943272661584838	0.0789124835170992	0.0949047342419871
Ctsc	0.00555507133476672	0.00777830656023008	0.0108065646873549	0.0056612810289171
Cxcl10	0.00234655489103714	0.00416387271780124	0.00680631761535647	0.00417758047969126
Cxcl14	0.011271058555997	0.03346970434508	0.0355268635320193	0.0246957528140369
Cxcr4	0.204660230133698	0.154352499932169	0.116771767375019	0.174812011656236
D730045B01Rik	0.711354502606833	0.684367338258477	0.636583365560642	0.667303785896927
Dagla	0.417943106448726	0.468912275128781	0.457747785442204	0.492660346669182
Dapk1	0.0888187213047755	0.115367344036137	0.203626524608528	0.122729657698165
Dbil5	0.393177423611974	0.371837564301165	0.312909550346799	0.362186444308851
Dclk3	0.418899423321771	0.381571276121131	0.441011585144302	0.384491830576495
Dcp2	0.337484002591506	0.380471784087825	0.410388485779439	0.383241720780054
Dct	0.262483221542174	0.197932604896758	0.182771397667308	0.23016385333345
Ddah2	0.260002581154814	0.183797778645236	0.17667627484161	0.27549713235053
Ddx4	0.0365728718592379	0.0273984956331464	0.069834751601547	0.0795054666322903
Ddx58	0.116014201031624	0.198543715979221	0.212325402897103	0.196766053269116
Ddx60	0.0234579961167332	0.137923056152351	0.283770453534757	0.177168546162808
Defb47	0.00719154719075686	0.0069795158064228	0.00834676848821438	0.00606036303387162
Depdc1b	0.580589481641649	0.567918741665324	0.591652205463861	0.586441170625935
Deptor	0.730971813919184	0.63670599092824	0.645006632327472	0.689736261335986
Dgkg	0.8214996751162	0.766417191907378	0.707356170717501	0.712689321038556
Dhx58	0.16756549167045	0.21097782262725	0.293539555215128	0.214275747327497
Dnah8	0.613175245168416	0.64527806488518	0.806903110453425	0.587493390982856
Dock7	0.0942996747572923	0.132873275790015	0.190242186472937	0.128243283613011
Dok7	0.550725312995811	0.60011091864532	0.659558685073526	0.579751273560453
Dse	0.293822761118872	0.268563074691169	0.285988498131439	0.261334735333969
Dtx3l	0.0411390137574652	0.177678294774994	0.243467451412903	0.147032793274289
Dtx4	0.9662320553658	0.87441720111728	0.800161874462019	0.863186947957717
Dusp23	0.491874839828539	0.439102028174905	0.378053709611193	0.471233931537228
Dzip1	0.36329608483517	0.325382709885859	0.339235387687114	0.384960219140954
E230001N04Rik	0.205626886195864	0.373172346403709	0.397433738196445	0.231256612529531
Ecm1	0.0178114423683197	0.0240871952897766	0.0242283418913929	0.0179593598153007
Efhd2	0.0721482106085553	0.0816357339833183	0.15245056200883	0.124351491590301
Efnb1	0.228627735476795	0.180941704898403	0.17354948383625	0.215339761527751
Efs	0.289426093090078	0.250190558108468	0.234913714033668	0.284425857948322
Egr1	0.884588115041743	0.878548305782389	0.797927955384104	0.850724439894267
Egr2	0.663544131060803	0.649988022309717	0.588555057723273	0.622964035776788
Eif1a	0.523807850237017	0.495828510254987	0.440112403985927	0.502145782722906
Eif2ak2	0.043669355091071	0.122353792369699	0.145362229516708	0.093234391991178
Eif4e3	0.281927202143968	0.3160617271143	0.398163657076892	0.345926417489842
Elf4	0.186636598397214	0.223592929136829	0.236385275063057	0.292162921962329
Emp3	0.0381360934466969	0.0645988833145386	0.0515756929606349	0.0855778504913827
Enc1	0.318219993455964	0.349983127328612	0.285871881513383	0.28997682469821
Endod1	0.618565338089224	0.637824839649015	0.669302698549227	0.679992992502184
Endou	0.396506478206843	0.356744139472942	0.369294473880663	0.434036968129347
Enpp1	0.585011382672504	0.527435611783883	0.480276056258093	0.493710959881045
Epha4	0.737086425891449	0.751333064465525	0.773019727637358	0.717821815596124
Ephb2	1.24913876190492	1.07367402806444	1.18518301195153	1.32266034888892
Ephx1	0.479806344516362	0.456811516600676	0.540998910836674	0.550618970956456
Eps8	0.161731303064754	0.200252842887306	0.238466286576167	0.193935829979563
Eps8l2	0.291002431239181	0.296091607552435	0.303443354519071	0.301072044749601
Erap1	0.253463820029038	0.31771165627539	0.30790248859218	0.303826720920817
Ermard	0.0482494399961505	0.106270332015141	0.102724457923318	0.0854725582666408
Etv6	0.787582225651661	1.03688778238103	1.01072213480815	0.9637834327274
Eva1b	0.0314930606916861	0.0259184796709914	0.036574907893507	0.0363763385272342
Eva1c	0.621587798483599	0.746837952522433	0.688510432056086	0.717430094941682
Eya1	0.332390058338827	0.300228040869406	0.29631328743623	0.268331385066956
Eya2	0.719514263699628	0.670653479909419	0.702524171592806	0.712267454330022
F830016B08Rik	0.000823130691602414	0.0065946851635208	0.0275558263642974	0.00742743633117419
Fam107a	0.368084544025587	0.52481158983058	0.57589513204821	0.42519239093538
Fam111a	0.0472334546553947	0.0671102840088221	0.0915977505633514	0.0590657497207573
Fam124a	0.136422325364461	0.170340437920474	0.262390273666315	0.227837767583114
Fam13a	0.190487639054786	0.380919871224708	0.696509165588322	0.396869160244344
Fam13c	0.884148021361581	0.878015818433201	0.922053692121551	0.956185972658975
Fam43a	0.237070698506358	0.244325246734817	0.266322544994137	0.25094791614169
Fam49a	0.281580019351929	0.327876605753647	0.408533313783762	0.354210211919031
Fap	0.0137108008405719	0.0191873112233111	0.0326766224103645	0.0142914439007404
Fas	0.0258918223710821	0.0456165557985476	0.0537844647641989	0.0520678793360361
Fat4	0.117910274598067	0.171922752732698	0.305389524723569	0.170904297115634
Fbln2	0.478756518405507	0.489199045450084	0.607587633576671	0.626280405973531
Fbn2	0.666782043728614	0.60529831271499	0.559974460359674	0.589276447367223
Fbxl21	0.291165358970636	0.252578018686667	0.286454828656867	0.330675647103928
Fchsd1	0.25054601794975	0.21926992464453	0.200328957221757	0.246565622579251
Fga	0.0849774488825131	0.0953302455220342	0.0799160524066934	0.0718494200653854
Fgfr4	0.127806104026656	0.138312443088341	0.171590262993811	0.151379819752826
Fgfrl1	0.722764318674327	0.783934382361804	0.707815145734002	0.761661897616569
Fgl2	0.00574773696335612	0.019596553149844	0.0328268378075088	0.0339402506717889
[truncated: 1,952 more rows]

## Sheet: DGE_ACC_MOL2
Pseudobulk aggregation of the accessibility of differentially expressed genes in MOL2 between timepoints, normalized by the total number of counts multiplied by 10,000 and natural log transformed
[truncated: 2,077 more rows]

[truncated: 22 more sheets: DGE_ACC_OPC, DGE_GRC_MOL56, DGE_GRC_MOL2, DGE_GRC_OPC, DGA_RNA_MOL56, DGA_RNA_MOL2, DGA_RNA_OPC, DGA_ACC_MOL56, DGA_ACC_MOL2, DGA_ACC_OPC, DGA_GRC_MOL56, DGA_GRC_MOL2, DGA_GRC_OPC, DDORC_RNA_MOL56, DDORC_RNA_MOL2, DDORC_RNA_OPC, DDORC_ACC_MOL56, DDORC_ACC_MOL2, DDORC_ACC_OPC, DDORC_GRC_MOL56 …]
