# Supplementary material for: Distinct transcriptomic and epigenomic responses of mature oligodendrocytes during disease progression in a mouse model of multiple sclerosis
Source: Nat Neurosci. 2025 Nov 17;28(12):2612–27. doi: 10.1038/s41593-025-02100-3 (PMC12672374; doi:10.1038/s41593-025-02100-3)
Supplement: Supplementary file 6 — GO of differential modalities between time points. [file 41593_2025_2100_MOESM6_ESM.xlsx]

## Sheet: Summary
Supplementary Table 4. Genes ontology of differential modality between timepoints
Naming of the sheets	GO_(Features Selection Acronym)_(OLG population)_(Timepoint1)_(Timepoint2)
GO	Gene Ontology using Ensembl via biomaRt on top50 most variable genes between timepoints before annotation (pvalueCutoff=1, qvalueCutoff=1, pAdjustMethod="fdr")
Features Selection Acronym	Full Name	Description
DGE	Differential Genes Expression	Selection of differentially expressed genes using DESeq2 between timepoint (Early/Ctrl, Peak/Early, Late/Early, and Peak/Late) with absolute log2FC > 1, pvalue adjusted < 0.01 and baseMean > 1
DGA	Differential Genes Accessibility	Selection of differentially genes/promoters accessibility using DESeq2 between timepoint (Early/Ctrl, Peak/Early, Late/Early, and Peak/Late) with absolute log2FC > 1, pvalue adjusted < 0.01 and baseMean > 1
DDORC	Differential Domains Of Regulatory Chromatin	Selection of differentially DORC counts (DORC scores reverted back to counts) using DESeq2 between timepoint (Early/Ctrl, Peak/Early, Late/Early, and Peak/Late) with absolute log2FC > 1, pvalue adjusted < 0.01 and baseMean > 1
OLG population
MOL56
MOL2
OPC
Timepoint	Description
Type I	High in Ctrl for DGE and DGA, high in Early for DDORC
Type II	High in Early for DGE and DGA, high in Peak for DDORC
Type III	High in Peak for DGE and DGA, high in Late for DDORC
Type IV	High in Late for DGE and DGA
If only one timepoint is specified, from all genes with the highest expression at this timepoint, only the top 50 most variable genes between this timepoint and the lowest value from any other timepoint have been used to get annotated by Ensembl and passed on for enrichment pathway analysis
If two timepoints are specified, from all genes with the highest expression at timepoint1 and second highest expression at timepoint2, only the top 50 most variable genes between timepoint1 and the lowest value from any other timepoint have been used to get annotated by Ensembl and passed on for enrichment pathway analysis
If a timepoint sheet is missing, no genes were found in the feature selection method for this timepoint or no genes were found in Ensembl annotation to perform pathway enrichment or no enriched pathways were found at this timepoint
Metrics explanation
ID	Pathway Identifier
Description	Description of the pathway
GeneRatio (M/N)	M/N where M is the number of genes of interest in the gene set and N is the total number of genes of interest
BgRatio (k/n)	k/n where k is the number of genes in the gene set and n is the total number of genes in all gene sets
pvalue	p-value
p.adjust	p-value ajusted by Bonferroni-Hochberg correction
qvalue	q-value (estimate of the FDR associated with the p-value ajusted by Bonferroni-Hochberg correction)
geneID	Gene name
Count	Number of gene annotated in a gene set
Significant	* (p.adjust < 0.05)

## Sheet: GO_DGA_MOL2_Early
ID	Description	GeneRatio	BgRatio	pvalue	p.adjust	qvalue	geneID	Count	Significant
R-MMU-977068	Termination of O-glycan biosynthesis	1/3	16/8582	0.00558333	0.0523193	0.0146861	Muc19	1
R-MMU-2453902	The canonical retinoid cycle in rods (twilight vision)	1/3	20/8582	0.00697591	0.0523193	0.0146861	Ttr	1
R-MMU-975634	Retinoid metabolism and transport	1/3	42/8582	0.0146119	0.0562811	0.0157982	Ttr	1
R-MMU-6806667	Metabolism of fat-soluble vitamins	1/3	46/8582	0.015996	0.0562811	0.0157982	Ttr	1
R-MMU-913709	O-linked glycosylation of mucins	1/3	54/8582	0.0187604	0.0562811	0.0157982	Muc19	1
R-MMU-2187338	Visual phototransduction	1/3	89/8582	0.0307937	0.0573393	0.0160952	Ttr	1
R-MMU-5173105	O-linked glycosylation	1/3	97/8582	0.0335302	0.0573393	0.0160952	Muc19	1
R-MMU-8957275	Post-translational protein phosphorylation	1/3	114/8582	0.0393284	0.0573393	0.0160952	Scg3	1
R-MMU-114608	Platelet degranulation	1/3	117/8582	0.0403491	0.0573393	0.0160952	Scg3	1
R-MMU-381426	Regulation of Insulin-like Growth Factor (IGF) transport and uptake by Insulin-like Growth Factor Binding Proteins (IGFBPs)	1/3	120/8582	0.0413692	0.0573393	0.0160952	Scg3	1
R-MMU-76005	Response to elevated platelet cytosolic Ca2+	1/3	122/8582	0.0420488	0.0573393	0.0160952	Scg3	1
R-MMU-196854	Metabolism of vitamins and cofactors	1/3	169/8582	0.057928	0.07241	0.0203256	Ttr	1
R-MMU-9709957	Sensory Perception	1/3	192/8582	0.0656343	0.0757319	0.0212581	Ttr	1
R-MMU-76002	Platelet activation signaling and aggregation	1/3	246/8582	0.083562	0.0895307	0.0251314	Scg3	1
R-MMU-109582	Hemostasis	1/3	492/8582	0.162334	0.162334	0.0455675	Scg3	1

## Sheet: GO_DGA_MOL2_Early_Ctrl
ID	Description	GeneRatio	BgRatio	pvalue	p.adjust	qvalue	geneID	Count	Significant
R-MMU-977068	Termination of O-glycan biosynthesis	1/2	16/8582	0.00372548	0.0335293	0.00784311	Muc19	1	*
R-MMU-913709	O-linked glycosylation of mucins	1/2	54/8582	0.0125456	0.0362972	0.00849057	Muc19	1	*
R-MMU-5173105	O-linked glycosylation	1/2	97/8582	0.022479	0.0362972	0.00849057	Muc19	1	*
R-MMU-8957275	Post-translational protein phosphorylation	1/2	114/8582	0.0263923	0.0362972	0.00849057	Scg3	1	*
R-MMU-114608	Platelet degranulation	1/2	117/8582	0.0270821	0.0362972	0.00849057	Scg3	1	*
R-MMU-381426	Regulation of Insulin-like Growth Factor (IGF) transport and uptake by Insulin-like Growth Factor Binding Proteins (IGFBPs)	1/2	120/8582	0.0277716	0.0362972	0.00849057	Scg3	1	*
R-MMU-76005	Response to elevated platelet cytosolic Ca2+	1/2	122/8582	0.0282311	0.0362972	0.00849057	Scg3	1	*
R-MMU-76002	Platelet activation signaling and aggregation	1/2	246/8582	0.0565109	0.0635747	0.0148713	Scg3	1
R-MMU-109582	Hemostasis	1/2	492/8582	0.111378	0.111378	0.0260534	Scg3	1

## Sheet: GO_DGA_MOL2_Early_Peak
ID	Description	GeneRatio	BgRatio	pvalue	p.adjust	qvalue	geneID	Count	Significant
R-MMU-2453902	The canonical retinoid cycle in rods (twilight vision)	1/1	20/8582	0.00233046	0.0107201	NA	Ttr	1	*
R-MMU-975634	Retinoid metabolism and transport	1/1	42/8582	0.00489396	0.0107201	NA	Ttr	1	*
R-MMU-6806667	Metabolism of fat-soluble vitamins	1/1	46/8582	0.00536006	0.0107201	NA	Ttr	1	*
R-MMU-2187338	Visual phototransduction	1/1	89/8582	0.0103705	0.0155558	NA	Ttr	1	*
R-MMU-196854	Metabolism of vitamins and cofactors	1/1	169/8582	0.0196924	0.0223724	NA	Ttr	1	*
R-MMU-9709957	Sensory Perception	1/1	192/8582	0.0223724	0.0223724	NA	Ttr	1	*

## Sheet: GO_DGA_MOL2_Late
ID	Description	GeneRatio	BgRatio	pvalue	p.adjust	qvalue	geneID	Count	Significant
R-MMU-8957275	Post-translational protein phosphorylation	3/9	114/8582	0.000180923	0.00431797	0.00199547	C4b/Apoe/Eva1a	3	*
R-MMU-381426	Regulation of Insulin-like Growth Factor (IGF) transport and uptake by Insulin-like Growth Factor Binding Proteins (IGFBPs)	3/9	120/8582	0.000210633	0.00431797	0.00199547	C4b/Apoe/Eva1a	3	*
R-MMU-5578775	Ion homeostasis	2/9	52/8582	0.00126162	0.0139405	0.00644232	Fxyd1/Fxyd7	2	*
R-MMU-936837	Ion transport by P-type ATPases	2/9	54/8582	0.00136005	0.0139405	0.00644232	Fxyd1/Fxyd7	2	*
R-MMU-216083	Integrin cell surface interactions	2/9	66/8582	0.00202536	0.016608	0.00767505	Col13a1/Itgb2	2	*
R-MMU-5576891	Cardiac conduction	2/9	98/8582	0.00441033	0.0301373	0.0139274	Fxyd1/Fxyd7	2	*
R-MMU-397014	Muscle contraction	2/9	153/8582	0.0104709	0.0470767	0.0217556	Fxyd1/Fxyd7	2	*
R-MMU-8964058	HDL remodeling	1/9	10/8582	0.0104432	0.0470767	0.0217556	Apoe	1	*
R-MMU-8963888	Chylomicron assembly	1/9	11/8582	0.0114821	0.0470767	0.0217556	Apoe	1	*
R-MMU-8963901	Chylomicron remodeling	1/9	11/8582	0.0114821	0.0470767	0.0217556	Apoe	1	*
R-MMU-983712	Ion channel transport	2/9	169/8582	0.0126723	0.047233	0.0218278	Fxyd1/Fxyd7	2	*
R-MMU-8963898	Plasma lipoprotein assembly	1/9	19/8582	0.019759	0.0655662	0.0303002	Apoe	1
R-MMU-166663	Initial triggering of complement	1/9	20/8582	0.0207893	0.0655662	0.0303002	C4b	1
R-MMU-1474244	Extracellular matrix organization	2/9	230/8582	0.0227384	0.0665909	0.0307737	Col13a1/Itgb2	2
R-MMU-8963899	Plasma lipoprotein remodeling	1/9	28/8582	0.0289968	0.079258	0.0366276	Apoe	1
R-MMU-2173782	Binding and Uptake of Ligands by Scavenger Receptors	1/9	33/8582	0.0340954	0.080151	0.0370403	Apoe	1
R-MMU-8964043	Plasma lipoprotein clearance	1/9	33/8582	0.0340954	0.080151	0.0370403	Apoe	1
R-MMU-8948216	Collagen chain trimerization	1/9	35/8582	0.0361282	0.080151	0.0370403	Col13a1	1
R-MMU-977606	Regulation of Complement cascade	1/9	36/8582	0.0371431	0.080151	0.0370403	C4b	1
R-MMU-2559582	Senescence-Associated Secretory Phenotype (SASP)	1/9	39/8582	0.0401823	0.0823738	0.0380675	Cebpb	1
R-MMU-975634	Retinoid metabolism and transport	1/9	42/8582	0.043213	0.0842115	0.0389167	Apoe	1
R-MMU-166658	Complement cascade	1/9	46/8582	0.0472406	0.0842115	0.0389167	C4b	1
R-MMU-6806667	Metabolism of fat-soluble vitamins	1/9	46/8582	0.0472406	0.0842115	0.0389167	Apoe	1
R-MMU-1442490	Collagen degradation	1/9	55/8582	0.0562477	0.0960898	0.0444061	Col13a1	1
R-MMU-1650814	Collagen biosynthesis and modifying enzymes	1/9	60/8582	0.0612189	0.100399	0.0463975	Col13a1	1
R-MMU-174824	Plasma lipoprotein assembly remodeling and clearance	1/9	64/8582	0.0651791	0.102782	0.0474989	Apoe	1
R-MMU-1474290	Collagen formation	1/9	73/8582	0.0740352	0.112424	0.0519545	Col13a1	1
R-MMU-202733	Cell surface interactions at the vascular wall	1/9	89/8582	0.0895954	0.125083	0.0578047	Itgb2	1
R-MMU-2187338	Visual phototransduction	1/9	89/8582	0.0895954	0.125083	0.0578047	Apoe	1
R-MMU-2559583	Cellular Senescence	1/9	91/8582	0.091524	0.125083	0.0578047	Cebpb	1
R-MMU-198933	Immunoregulatory interactions between a Lymphoid and a non-Lymphoid cell	1/9	95/8582	0.0953703	0.126135	0.0582909	Itgb2	1
R-MMU-1474228	Degradation of the extracellular matrix	1/9	106/8582	0.105873	0.13565	0.062688	Col13a1	1
R-MMU-166016	Toll Like Receptor 4 (TLR4) Cascade	1/9	111/8582	0.110611	0.137426	0.0635088	Itgb2	1
R-MMU-168898	Toll-like Receptor Cascades	1/9	139/8582	0.136734	0.164885	0.0761987	Itgb2	1
R-MMU-6805567	Keratinization	1/9	147/8582	0.144072	0.16877	0.0779937	Krtap16-1	1
R-MMU-196854	Metabolism of vitamins and cofactors	1/9	169/8582	0.163964	0.186737	0.086297	Apoe	1
R-MMU-9709957	Sensory Perception	1/9	192/8582	0.184321	0.204247	0.0943891	Apoe	1
R-MMU-2262752	Cellular responses to stress	1/9	440/8582	0.377435	0.391794	0.18106	Cebpb	1
R-MMU-8953897	Cellular responses to stimuli	1/9	443/8582	0.379497	0.391794	0.18106	Cebpb	1
R-MMU-1266738	Developmental Biology	1/9	447/8582	0.382238	0.391794	0.18106	Krtap16-1	1
R-MMU-109582	Hemostasis	1/9	492/8582	0.412336	0.412336	0.190553	Itgb2	1

## Sheet: GO_DGA_MOL2_Late_Peak
ID	Description	GeneRatio	BgRatio	pvalue	p.adjust	qvalue	geneID	Count	Significant
R-MMU-8957275	Post-translational protein phosphorylation	3/9	114/8582	0.000180923	0.00431797	0.00199547	C4b/Apoe/Eva1a	3	*
R-MMU-381426	Regulation of Insulin-like Growth Factor (IGF) transport and uptake by Insulin-like Growth Factor Binding Proteins (IGFBPs)	3/9	120/8582	0.000210633	0.00431797	0.00199547	C4b/Apoe/Eva1a	3	*
R-MMU-5578775	Ion homeostasis	2/9	52/8582	0.00126162	0.0139405	0.00644232	Fxyd1/Fxyd7	2	*
R-MMU-936837	Ion transport by P-type ATPases	2/9	54/8582	0.00136005	0.0139405	0.00644232	Fxyd1/Fxyd7	2	*
R-MMU-216083	Integrin cell surface interactions	2/9	66/8582	0.00202536	0.016608	0.00767505	Col13a1/Itgb2	2	*
R-MMU-5576891	Cardiac conduction	2/9	98/8582	0.00441033	0.0301373	0.0139274	Fxyd1/Fxyd7	2	*
R-MMU-397014	Muscle contraction	2/9	153/8582	0.0104709	0.0470767	0.0217556	Fxyd1/Fxyd7	2	*
R-MMU-8964058	HDL remodeling	1/9	10/8582	0.0104432	0.0470767	0.0217556	Apoe	1	*
R-MMU-8963888	Chylomicron assembly	1/9	11/8582	0.0114821	0.0470767	0.0217556	Apoe	1	*
R-MMU-8963901	Chylomicron remodeling	1/9	11/8582	0.0114821	0.0470767	0.0217556	Apoe	1	*
R-MMU-983712	Ion channel transport	2/9	169/8582	0.0126723	0.047233	0.0218278	Fxyd1/Fxyd7	2	*
R-MMU-8963898	Plasma lipoprotein assembly	1/9	19/8582	0.019759	0.0655662	0.0303002	Apoe	1
R-MMU-166663	Initial triggering of complement	1/9	20/8582	0.0207893	0.0655662	0.0303002	C4b	1
R-MMU-1474244	Extracellular matrix organization	2/9	230/8582	0.0227384	0.0665909	0.0307737	Col13a1/Itgb2	2
R-MMU-8963899	Plasma lipoprotein remodeling	1/9	28/8582	0.0289968	0.079258	0.0366276	Apoe	1
R-MMU-2173782	Binding and Uptake of Ligands by Scavenger Receptors	1/9	33/8582	0.0340954	0.080151	0.0370403	Apoe	1
R-MMU-8964043	Plasma lipoprotein clearance	1/9	33/8582	0.0340954	0.080151	0.0370403	Apoe	1
R-MMU-8948216	Collagen chain trimerization	1/9	35/8582	0.0361282	0.080151	0.0370403	Col13a1	1
R-MMU-977606	Regulation of Complement cascade	1/9	36/8582	0.0371431	0.080151	0.0370403	C4b	1
R-MMU-2559582	Senescence-Associated Secretory Phenotype (SASP)	1/9	39/8582	0.0401823	0.0823738	0.0380675	Cebpb	1
R-MMU-975634	Retinoid metabolism and transport	1/9	42/8582	0.043213	0.0842115	0.0389167	Apoe	1
R-MMU-166658	Complement cascade	1/9	46/8582	0.0472406	0.0842115	0.0389167	C4b	1
R-MMU-6806667	Metabolism of fat-soluble vitamins	1/9	46/8582	0.0472406	0.0842115	0.0389167	Apoe	1
R-MMU-1442490	Collagen degradation	1/9	55/8582	0.0562477	0.0960898	0.0444061	Col13a1	1
R-MMU-1650814	Collagen biosynthesis and modifying enzymes	1/9	60/8582	0.0612189	0.100399	0.0463975	Col13a1	1
R-MMU-174824	Plasma lipoprotein assembly remodeling and clearance	1/9	64/8582	0.0651791	0.102782	0.0474989	Apoe	1
R-MMU-1474290	Collagen formation	1/9	73/8582	0.0740352	0.112424	0.0519545	Col13a1	1
R-MMU-202733	Cell surface interactions at the vascular wall	1/9	89/8582	0.0895954	0.125083	0.0578047	Itgb2	1
R-MMU-2187338	Visual phototransduction	1/9	89/8582	0.0895954	0.125083	0.0578047	Apoe	1
R-MMU-2559583	Cellular Senescence	1/9	91/8582	0.091524	0.125083	0.0578047	Cebpb	1
R-MMU-198933	Immunoregulatory interactions between a Lymphoid and a non-Lymphoid cell	1/9	95/8582	0.0953703	0.126135	0.0582909	Itgb2	1
R-MMU-1474228	Degradation of the extracellular matrix	1/9	106/8582	0.105873	0.13565	0.062688	Col13a1	1
R-MMU-166016	Toll Like Receptor 4 (TLR4) Cascade	1/9	111/8582	0.110611	0.137426	0.0635088	Itgb2	1
R-MMU-168898	Toll-like Receptor Cascades	1/9	139/8582	0.136734	0.164885	0.0761987	Itgb2	1
R-MMU-6805567	Keratinization	1/9	147/8582	0.144072	0.16877	0.0779937	Krtap16-1	1
R-MMU-196854	Metabolism of vitamins and cofactors	1/9	169/8582	0.163964	0.186737	0.086297	Apoe	1
R-MMU-9709957	Sensory Perception	1/9	192/8582	0.184321	0.204247	0.0943891	Apoe	1
R-MMU-2262752	Cellular responses to stress	1/9	440/8582	0.377435	0.391794	0.18106	Cebpb	1
R-MMU-8953897	Cellular responses to stimuli	1/9	443/8582	0.379497	0.391794	0.18106	Cebpb	1
R-MMU-1266738	Developmental Biology	1/9	447/8582	0.382238	0.391794	0.18106	Krtap16-1	1
R-MMU-109582	Hemostasis	1/9	492/8582	0.412336	0.412336	0.190553	Itgb2	1

## Sheet: GO_DGA_MOL2_Peak
ID	Description	GeneRatio	BgRatio	pvalue	p.adjust	qvalue	geneID	Count	Significant
R-MMU-198933	Immunoregulatory interactions between a Lymphoid and a non-Lymphoid cell	3/8	95/8582	7.0695e-05	0.00197946	0.000669743	H2-Q4/H2-Q7/Cd200r2	3	*
R-MMU-1236977	Endosomal/Vacuolar pathway	2/8	24/8582	0.000207737	0.00290832	0.000984018	H2-Q4/H2-Q7	2	*
R-MMU-1236974	ER-Phagosome pathway	2/8	33/8582	0.000395744	0.00369361	0.00124972	H2-Q4/H2-Q7	2	*
R-MMU-983170	Antigen Presentation: Folding assembly and peptide loading of class I MHC	2/8	40/8582	0.000582715	0.00407901	0.00138012	H2-Q4/H2-Q7	2	*
R-MMU-2172127	DAP12 interactions	2/8	61/8582	0.0013538	0.00758128	0.00256509	H2-Q4/H2-Q7	2	*
R-MMU-1236975	Antigen processing-Cross presentation	2/8	91/8582	0.00298723	0.0139404	0.00471668	H2-Q4/H2-Q7	2	*
R-MMU-114608	Platelet degranulation	2/8	117/8582	0.00489044	0.0185738	0.00628438	Serping1/Serpina3i	2	*
R-MMU-76005	Response to elevated platelet cytosolic Ca2+	2/8	122/8582	0.00530681	0.0185738	0.00628438	Serping1/Serpina3i	2	*
R-MMU-76002	Platelet activation signaling and aggregation	2/8	246/8582	0.0204433	0.0495805	0.0167753	Serping1/Serpina3i	2	*
R-MMU-140837	Intrinsic Pathway of Fibrin Clot Formation	1/8	21/8582	0.0194169	0.0495805	0.0167753	Serping1	1	*
R-MMU-3371571	HSF1-dependent transactivation	1/8	22/8582	0.0203332	0.0495805	0.0167753	Hspb8	1	*
R-MMU-5357786	TNFR1-induced proapoptotic signaling	1/8	23/8582	0.0212488	0.0495805	0.0167753	Tnfrsf1a	1	*
R-MMU-5669034	TNFs bind their physiological receptors	1/8	25/8582	0.0230777	0.0497058	0.0168177	Tnfrsf1a	1	*
R-MMU-5357956	TNFR1-induced NF-kappa-B signaling pathway	1/8	32/8582	0.0294553	0.0578958	0.0195888	Tnfrsf1a	1
R-MMU-140877	Formation of Fibrin Clot (Clotting Cascade)	1/8	36/8582	0.0330833	0.0578958	0.0195888	Serping1	1
R-MMU-977606	Regulation of Complement cascade	1/8	36/8582	0.0330833	0.0578958	0.0195888	Serping1	1
R-MMU-983169	Class I MHC mediated antigen processing & presentation	2/8	342/8582	0.0378126	0.0622795	0.021072	H2-Q4/H2-Q7	2
R-MMU-166658	Complement cascade	1/8	46/8582	0.0421014	0.0633672	0.02144	Serping1	1
R-MMU-5357905	Regulation of TNFR1 signaling	1/8	47/8582	0.0429992	0.0633672	0.02144	Tnfrsf1a	1
R-MMU-75893	TNF signaling	1/8	56/8582	0.0510458	0.0714642	0.0241796	Tnfrsf1a	1
R-MMU-109582	Hemostasis	2/8	492/8582	0.0729789	0.0928822	0.0314263	Serping1/Serpina3i	2
R-MMU-3371556	Cellular response to heat stress	1/8	79/8582	0.0713412	0.0928822	0.0314263	Hspb8	1
R-MMU-5668541	TNFR2 non-canonical NF-kB pathway	1/8	96/8582	0.086097	0.104814	0.0354633	Tnfrsf1a	1
R-MMU-73887	Death Receptor Signaling	1/8	135/8582	0.119176	0.139038	0.0470431	Tnfrsf1a	1
R-MMU-8951664	Neddylation	1/8	220/8582	0.187664	0.210183	0.0711146	Ubd	1
R-MMU-2262752	Cellular responses to stress	1/8	440/8582	0.343758	0.34826	0.117832	Hspb8	1
R-MMU-8953897	Cellular responses to stimuli	1/8	443/8582	0.345691	0.34826	0.117832	Hspb8	1
R-MMU-1280215	Cytokine Signaling in Immune system	1/8	447/8582	0.34826	0.34826	0.117832	Tnfrsf1a	1

## Sheet: GO_DGA_MOL2_Peak_Ctrl
ID	Description	GeneRatio	BgRatio	pvalue	p.adjust	qvalue	geneID	Count	Significant
R-MMU-1679131	Trafficking and processing of endosomal TLR	1/12	11/8582	0.0152828	0.18234	0.151223	Tlr7	1
R-MMU-211979	Eicosanoids	1/12	11/8582	0.0152828	0.18234	0.151223	Cyp4f40	1
R-MMU-5576893	Phase 2 - plateau phase	1/12	13/8582	0.0180384	0.18234	0.151223	Cacng6	1
R-MMU-189200	Cellular hexose transport	1/12	17/8582	0.0235283	0.18234	0.151223	Slc5a4a	1
R-MMU-2142691	Synthesis of Leukotrienes (LT) and Eoxins (EX)	1/12	20/8582	0.0276273	0.18234	0.151223	Cyp4f40	1
R-MMU-8951664	Neddylation	2/12	220/8582	0.0364581	0.20052	0.1663	Fbxo40/Asb17	2
R-MMU-983168	Antigen processing: Ubiquitination & Proteasome degradation	2/12	285/8582	0.0582411	0.205659	0.170563	Fbxo40/Asb17	2
R-MMU-983169	Class I MHC mediated antigen processing & presentation	2/12	342/8582	0.0802976	0.205659	0.170563	Fbxo40/Asb17	2
R-MMU-70263	Gluconeogenesis	1/12	34/8582	0.0465482	0.205659	0.170563	Aldob	1
R-MMU-2142753	Arachidonic acid metabolism	1/12	53/8582	0.0716869	0.205659	0.170563	Cyp4f40	1
R-MMU-913709	O-linked glycosylation of mucins	1/12	54/8582	0.072993	0.205659	0.170563	Gcnt3	1
R-MMU-977443	GABA receptor activation	1/12	57/8582	0.0769012	0.205659	0.170563	Gabra3	1
R-MMU-70171	Glycolysis	1/12	62/8582	0.0833814	0.205659	0.170563	Aldob	1
R-MMU-211897	Cytochrome P450 - arranged by substrate type	1/12	65/8582	0.0872494	0.205659	0.170563	Cyp4f40	1
R-MMU-70326	Glucose metabolism	1/12	80/8582	0.106366	0.208235	0.172699	Aldob	1
R-MMU-168181	Toll Like Receptor 7/8 (TLR7/8) Cascade	1/12	85/8582	0.112656	0.208235	0.172699	Tlr7	1
R-MMU-202733	Cell surface interactions at the vascular wall	1/12	89/8582	0.117659	0.208235	0.172699	Spn	1
R-MMU-2672351	Stimuli-sensing channels	1/12	95/8582	0.125115	0.208235	0.172699	Ano5	1
R-MMU-5173105	O-linked glycosylation	1/12	97/8582	0.127588	0.208235	0.172699	Gcnt3	1
R-MMU-5576891	Cardiac conduction	1/12	98/8582	0.128821	0.208235	0.172699	Cacng6	1
R-MMU-211945	Phase I - Functionalization of compounds	1/12	101/8582	0.132513	0.208235	0.172699	Cyp4f40	1
R-MMU-112314	Neurotransmitter receptors and postsynaptic signal transmission	1/12	138/8582	0.176882	0.255466	0.21187	Gabra3	1
R-MMU-168898	Toll-like Receptor Cascades	1/12	139/8582	0.178052	0.255466	0.21187	Tlr7	1
R-MMU-397014	Muscle contraction	1/12	153/8582	0.194269	0.26712	0.221535	Cacng6	1
R-MMU-8978868	Fatty acid metabolism	1/12	163/8582	0.205673	0.269641	0.223625	Cyp4f40	1
R-MMU-983712	Ion channel transport	1/12	169/8582	0.212444	0.269641	0.223625	Ano5	1
R-MMU-112315	Transmission across Chemical Synapses	1/12	201/8582	0.247671	0.291898	0.242084	Gabra3	1
R-MMU-211859	Biological oxidations	1/12	201/8582	0.247671	0.291898	0.242084	Cyp4f40	1
R-MMU-425407	SLC-mediated transmembrane transport	1/12	218/8582	0.265792	0.302453	0.250838	Slc5a4a	1
R-MMU-446203	Asparagine N-linked glycosylation	1/12	256/8582	0.30486	0.331965	0.275314	Umod	1
R-MMU-71387	Metabolism of carbohydrates	1/12	263/8582	0.311846	0.331965	0.275314	Aldob	1
R-MMU-112316	Neuronal System	1/12	323/8582	0.369135	0.38067	0.315707	Gabra3	1
R-MMU-109582	Hemostasis	1/12	492/8582	0.507828	0.507828	0.421165	Spn	1

## Sheet: GO_DGA_MOL2_Peak_Early
ID	Description	GeneRatio	BgRatio	pvalue	p.adjust	qvalue	geneID	Count	Significant
R-MMU-425407	SLC-mediated transmembrane transport	2/11	218/8582	0.0303772	0.143675	0.103478	Slc13a1/Slc17a8	2
R-MMU-1296346	Tandem pore domain potassium channels	1/11	11/8582	0.0140174	0.143675	0.103478	Kcnk10	1
R-MMU-166786	Creation of C4 and C2 activators	1/11	14/8582	0.0178092	0.143675	0.103478	C1qa	1
R-MMU-5576886	Phase 4 - resting membrane potential	1/11	17/8582	0.0215877	0.143675	0.103478	Kcnk10	1
R-MMU-888590	GABA synthesis release reuptake and degradation	1/11	18/8582	0.0228443	0.143675	0.103478	Gad2	1
R-MMU-166663	Initial triggering of complement	1/11	20/8582	0.025353	0.143675	0.103478	C1qa	1
R-MMU-5669034	TNFs bind their physiological receptors	1/11	25/8582	0.0315993	0.143675	0.103478	Tnfrsf11b	1
R-MMU-3295583	TRP channels	1/11	27/8582	0.0340876	0.143675	0.103478	Trpc4	1
R-MMU-1169408	ISG15 antiviral mechanism	1/11	28/8582	0.0353296	0.143675	0.103478	Isg15	1
R-MMU-5656169	Termination of translesion DNA synthesis	1/11	30/8582	0.0378091	0.143675	0.103478	Isg15	1
R-MMU-977606	Regulation of Complement cascade	1/11	36/8582	0.0452132	0.147067	0.105921	C1qa	1
R-MMU-110313	Translesion synthesis by Y family DNA polymerases bypasses lesions on DNA template	1/11	37/8582	0.0464421	0.147067	0.105921	Isg15	1
R-MMU-112316	Neuronal System	2/11	323/8582	0.0620625	0.147399	0.10616	Kcnk10/Gad2	2
R-MMU-166658	Complement cascade	1/11	46/8582	0.0574382	0.147399	0.10616	C1qa	1
R-MMU-73893	DNA Damage Bypass	1/11	46/8582	0.0574382	0.147399	0.10616	Isg15	1
R-MMU-112310	Neurotransmitter release cycle	1/11	48/8582	0.059866	0.147399	0.10616	Gad2	1
R-MMU-1280215	Cytokine Signaling in Immune system	2/11	447/8582	0.109103	0.175221	0.126198	Isg15/Tnfrsf11b	2
R-MMU-9833482	PKR-mediated signaling	1/11	64/8582	0.0790852	0.175221	0.126198	Isg15	1
R-MMU-425366	Transport of bile salts and organic acids metal ions and amine compounds	1/11	70/8582	0.0861998	0.175221	0.126198	Slc13a1	1
R-MMU-1169410	Antiviral mechanism by IFN-stimulated genes	1/11	91/8582	0.110709	0.175221	0.126198	Isg15	1
R-MMU-198933	Immunoregulatory interactions between a Lymphoid and a non-Lymphoid cell	1/11	95/8582	0.115309	0.175221	0.126198	Ifitm2	1
R-MMU-2672351	Stimuli-sensing channels	1/11	95/8582	0.115309	0.175221	0.126198	Trpc4	1
R-MMU-5668541	TNFR2 non-canonical NF-kB pathway	1/11	96/8582	0.116456	0.175221	0.126198	Tnfrsf11b	1
R-MMU-1296071	Potassium Channels	1/11	97/8582	0.117601	0.175221	0.126198	Kcnk10	1
R-MMU-5576891	Cardiac conduction	1/11	98/8582	0.118745	0.175221	0.126198	Kcnk10	1
R-MMU-425393	Transport of inorganic cations/anions and amino acids/oligopeptides	1/11	99/8582	0.119888	0.175221	0.126198	Slc17a8	1
R-MMU-114608	Platelet degranulation	1/11	117/8582	0.140226	0.197355	0.142139	Serpina3i	1
R-MMU-76005	Response to elevated platelet cytosolic Ca2+	1/11	122/8582	0.145799	0.19787	0.14251	Serpina3i	1
R-MMU-913531	Interferon Signaling	1/11	131/8582	0.155748	0.204083	0.146985	Isg15	1
R-MMU-397014	Muscle contraction	1/11	153/8582	0.179625	0.227525	0.163868	Kcnk10	1
R-MMU-983712	Ion channel transport	1/11	169/8582	0.196603	0.240997	0.173571	Trpc4	1
R-MMU-112315	Transmission across Chemical Synapses	1/11	201/8582	0.229604	0.272655	0.196372	Gad2	1
R-MMU-76002	Platelet activation signaling and aggregation	1/11	246/8582	0.273929	0.315434	0.227182	Serpina3i	1
R-MMU-418594	G alpha (i) signalling events	1/11	274/8582	0.300326	0.33408	0.240612	Sucnr1	1
R-MMU-73894	DNA Repair	1/11	282/8582	0.307706	0.33408	0.240612	Isg15	1
R-MMU-373076	Class A/1 (Rhodopsin-like receptors)	1/11	307/8582	0.330314	0.348665	0.251116	Sucnr1	1
R-MMU-500792	GPCR ligand binding	1/11	394/8582	0.40386	0.414775	0.29873	Sucnr1	1
R-MMU-109582	Hemostasis	1/11	492/8582	0.477855	0.477855	0.344162	Serpina3i	1

## Sheet: GO_DGA_MOL2_Peak_Late
ID	Description	GeneRatio	BgRatio	pvalue	p.adjust	qvalue	geneID	Count	Significant
R-MMU-1236975	Antigen processing-Cross presentation	3/8	91/8582	6.21573e-05	0.00459518	0.003758	H2-Q4/H2-Q7/Psmb9	3	*
R-MMU-198933	Immunoregulatory interactions between a Lymphoid and a non-Lymphoid cell	3/8	95/8582	7.0695e-05	0.00459518	0.003758	H2-Q4/H2-Q7/Cd200r2	3	*
R-MMU-1236977	Endosomal/Vacuolar pathway	2/8	24/8582	0.000207737	0.00900194	0.00736191	H2-Q4/H2-Q7	2	*
R-MMU-1236974	ER-Phagosome pathway	2/8	33/8582	0.000395744	0.0128617	0.0105185	H2-Q4/H2-Q7	2	*
R-MMU-983170	Antigen Presentation: Folding assembly and peptide loading of class I MHC	2/8	40/8582	0.000582715	0.0151506	0.0123904	H2-Q4/H2-Q7	2	*
R-MMU-2172127	DAP12 interactions	2/8	61/8582	0.0013538	0.0293323	0.0239884	H2-Q4/H2-Q7	2	*
R-MMU-983169	Class I MHC mediated antigen processing & presentation	3/8	342/8582	0.00302528	0.0539285	0.0441034	H2-Q4/H2-Q7/Psmb9	3
R-MMU-5668541	TNFR2 non-canonical NF-kB pathway	2/8	96/8582	0.00331867	0.0539285	0.0441034	Tnfrsf1a/Psmb9	2
R-MMU-8951664	Neddylation	2/8	220/8582	0.016543	0.122256	0.0999822	Ubd/Psmb9	2
R-MMU-2262752	Cellular responses to stress	2/8	440/8582	0.0598031	0.122256	0.0999822	Hspb8/Psmb9	2
R-MMU-8953897	Cellular responses to stimuli	2/8	443/8582	0.0605366	0.122256	0.0999822	Hspb8/Psmb9	2
R-MMU-1280215	Cytokine Signaling in Immune system	2/8	447/8582	0.0615199	0.122256	0.0999822	Tnfrsf1a/Psmb9	2
R-MMU-140837	Intrinsic Pathway of Fibrin Clot Formation	1/8	21/8582	0.0194169	0.122256	0.0999822	Serping1	1
R-MMU-3371571	HSF1-dependent transactivation	1/8	22/8582	0.0203332	0.122256	0.0999822	Hspb8	1
R-MMU-5357786	TNFR1-induced proapoptotic signaling	1/8	23/8582	0.0212488	0.122256	0.0999822	Tnfrsf1a	1
R-MMU-5669034	TNFs bind their physiological receptors	1/8	25/8582	0.0230777	0.122256	0.0999822	Tnfrsf1a	1
R-MMU-5357956	TNFR1-induced NF-kappa-B signaling pathway	1/8	32/8582	0.0294553	0.122256	0.0999822	Tnfrsf1a	1
R-MMU-140877	Formation of Fibrin Clot (Clotting Cascade)	1/8	36/8582	0.0330833	0.122256	0.0999822	Serping1	1
R-MMU-977606	Regulation of Complement cascade	1/8	36/8582	0.0330833	0.122256	0.0999822	Serping1	1
R-MMU-166658	Complement cascade	1/8	46/8582	0.0421014	0.122256	0.0999822	Serping1	1
R-MMU-5357905	Regulation of TNFR1 signaling	1/8	47/8582	0.0429992	0.122256	0.0999822	Tnfrsf1a	1
R-MMU-1236978	Cross-presentation of soluble exogenous antigens (endosomes)	1/8	49/8582	0.0447925	0.122256	0.0999822	Psmb9	1
R-MMU-350562	Regulation of ornithine decarboxylase (ODC)	1/8	51/8582	0.0465828	0.122256	0.0999822	Psmb9	1
R-MMU-75815	Ubiquitin-dependent degradation of Cyclin D	1/8	51/8582	0.0465828	0.122256	0.0999822	Psmb9	1
R-MMU-9762114	GSK3B and BTRC:CUL1-mediated-degradation of NFE2L2	1/8	51/8582	0.0465828	0.122256	0.0999822	Psmb9	1
R-MMU-349425	Autodegradation of the E3 ubiquitin ligase COP1	1/8	52/8582	0.0474769	0.122256	0.0999822	Psmb9	1
R-MMU-69601	Ubiquitin Mediated Degradation of Phosphorylated Cdc25A	1/8	52/8582	0.0474769	0.122256	0.0999822	Psmb9	1
R-MMU-69610	p53-Independent DNA Damage Response	1/8	52/8582	0.0474769	0.122256	0.0999822	Psmb9	1
R-MMU-69613	p53-Independent G1/S DNA damage checkpoint	1/8	52/8582	0.0474769	0.122256	0.0999822	Psmb9	1
R-MMU-8939902	Regulation of RUNX2 expression and activity	1/8	52/8582	0.0474769	0.122256	0.0999822	Psmb9	1
R-MMU-8941858	Regulation of RUNX3 expression and activity	1/8	53/8582	0.0483702	0.122256	0.0999822	Psmb9	1
R-MMU-8854050	FBXL7 down-regulates AURKA during mitotic entry and in early mitosis	1/8	54/8582	0.0492628	0.122256	0.0999822	Psmb9	1
R-MMU-4641257	Degradation of AXIN	1/8	55/8582	0.0501547	0.122256	0.0999822	Psmb9	1
R-MMU-9759194	Nuclear events mediated by NFE2L2	1/8	55/8582	0.0501547	0.122256	0.0999822	Psmb9	1
R-MMU-450408	AUF1 (hnRNP D0) binds and destabilizes mRNA	1/8	56/8582	0.0510458	0.122256	0.0999822	Psmb9	1
R-MMU-5610780	Degradation of GLI1 by the proteasome	1/8	56/8582	0.0510458	0.122256	0.0999822	Psmb9	1
R-MMU-69541	Stabilization of p53	1/8	56/8582	0.0510458	0.122256	0.0999822	Psmb9	1
R-MMU-75893	TNF signaling	1/8	56/8582	0.0510458	0.122256	0.0999822	Tnfrsf1a	1
R-MMU-4641258	Degradation of DVL	1/8	57/8582	0.0519363	0.122256	0.0999822	Psmb9	1
R-MMU-5607761	Dectin-1 mediated noncanonical NF-kB signaling	1/8	57/8582	0.0519363	0.122256	0.0999822	Psmb9	1
R-MMU-5610785	GLI3 is processed to GLI3R by the proteasome	1/8	57/8582	0.0519363	0.122256	0.0999822	Psmb9	1
R-MMU-5676590	NIK-->noncanonical NF-kB signaling	1/8	57/8582	0.0519363	0.122256	0.0999822	Psmb9	1
R-MMU-351202	Metabolism of polyamines	1/8	59/8582	0.0537149	0.122256	0.0999822	Psmb9	1
R-MMU-187577	SCF(Skp2)-mediated degradation of p27/p21	1/8	60/8582	0.0546031	0.122256	0.0999822	Psmb9	1
R-MMU-4608870	Asymmetric localization of PCP proteins	1/8	62/8582	0.0563773	0.122256	0.0999822	Psmb9	1
R-MMU-1169091	Activation of NF-kappaB in B cells	1/8	63/8582	0.0572634	0.122256	0.0999822	Psmb9	1
R-MMU-5358346	Hedgehog ligand biogenesis	1/8	63/8582	0.0572634	0.122256	0.0999822	Psmb9	1
R-MMU-8878166	Transcriptional regulation by RUNX2	1/8	63/8582	0.0572634	0.122256	0.0999822	Psmb9	1
R-MMU-174084	Autodegradation of Cdh1 by Cdh1:APC/C	1/8	64/8582	0.0581487	0.122256	0.0999822	Psmb9	1
R-MMU-69563	p53-Dependent G1 DNA Damage Response	1/8	64/8582	0.0581487	0.122256	0.0999822	Psmb9	1
R-MMU-69580	p53-Dependent G1/S DNA damage checkpoint	1/8	64/8582	0.0581487	0.122256	0.0999822	Psmb9	1
R-MMU-1234176	Oxygen-dependent proline hydroxylation of Hypoxia-inducible Factor Alpha	1/8	66/8582	0.0599171	0.122256	0.0999822	Psmb9	1
R-MMU-69615	G1/S DNA Damage Checkpoints	1/8	66/8582	0.0599171	0.122256	0.0999822	Psmb9	1
R-MMU-8939236	RUNX1 regulates transcription of genes involved in differentiation of HSCs	1/8	66/8582	0.0599171	0.122256	0.0999822	Psmb9	1
R-MMU-5658442	Regulation of RAS by GAPs	1/8	67/8582	0.0608002	0.122256	0.0999822	Psmb9	1
R-MMU-174154	APC/C:Cdc20 mediated degradation of Securin	1/8	68/8582	0.0616826	0.122256	0.0999822	Psmb9	1
R-MMU-8948751	Regulation of PTEN stability and activity	1/8	68/8582	0.0616826	0.122256	0.0999822	Psmb9	1
R-MMU-1234174	Cellular response to hypoxia	1/8	70/8582	0.0634452	0.122256	0.0999822	Psmb9	1
R-MMU-68949	Orc1 removal from chromatin	1/8	70/8582	0.0634452	0.122256	0.0999822	Psmb9	1
R-MMU-69202	Cyclin E associated events during G1/S transition	1/8	70/8582	0.0634452	0.122256	0.0999822	Psmb9	1
R-MMU-69656	Cyclin A:Cdk2-associated events at S phase entry	1/8	72/8582	0.065205	0.122256	0.0999822	Psmb9	1
R-MMU-174184	Cdc20:Phospho-APC/C mediated degradation of Cyclin A	1/8	73/8582	0.0660837	0.122256	0.0999822	Psmb9	1
R-MMU-5687128	MAPK6/MAPK4 signaling	1/8	73/8582	0.0660837	0.122256	0.0999822	Psmb9	1
R-MMU-69017	CDK-mediated phosphorylation and removal of Cdc6	1/8	73/8582	0.0660837	0.122256	0.0999822	Psmb9	1
R-MMU-174178	APC/C:Cdh1 mediated degradation of Cdc20 and other APC/C:Cdh1 targeted proteins in late mitosis/early G1	1/8	74/8582	0.0669618	0.122256	0.0999822	Psmb9	1
R-MMU-179419	APC:Cdc20 mediated degradation of cell cycle proteins prior to satisfation of the cell cycle checkpoint	1/8	74/8582	0.0669618	0.122256	0.0999822	Psmb9	1
R-MMU-1168372	Downstream signaling events of B Cell Receptor (BCR)	1/8	75/8582	0.0678391	0.122256	0.0999822	Psmb9	1
R-MMU-8852276	The role of GTSE1 in G2/M progression after G2 checkpoint	1/8	75/8582	0.0678391	0.122256	0.0999822	Psmb9	1
R-MMU-176409	APC/C:Cdc20 mediated degradation of mitotic proteins	1/8	76/8582	0.0687157	0.122256	0.0999822	Psmb9	1
R-MMU-8878159	Transcriptional regulation by RUNX3	1/8	76/8582	0.0687157	0.122256	0.0999822	Psmb9	1
R-MMU-176814	Activation of APC/C and APC/C:Cdc20 mediated degradation of mitotic proteins	1/8	77/8582	0.0695916	0.122256	0.0999822	Psmb9	1
R-MMU-195253	Degradation of beta-catenin by the destruction complex	1/8	77/8582	0.0695916	0.122256	0.0999822	Psmb9	1
R-MMU-2871837	FCERI mediated NF-kB activation	1/8	77/8582	0.0695916	0.122256	0.0999822	Psmb9	1
R-MMU-9755511	KEAP1-NFE2L2 pathway	1/8	77/8582	0.0695916	0.122256	0.0999822	Psmb9	1
R-MMU-3371556	Cellular response to heat stress	1/8	79/8582	0.0713412	0.123658	0.101129	Hspb8	1
R-MMU-5632684	Hedgehog 'on' state	1/8	81/8582	0.0730879	0.124151	0.101533	Psmb9	1
R-MMU-68867	Assembly of the pre-replicative complex	1/8	82/8582	0.0739602	0.124151	0.101533	Psmb9	1
R-MMU-202424	Downstream TCR signaling	1/8	85/8582	0.0765728	0.124151	0.101533	Psmb9	1
R-MMU-450531	Regulation of mRNA stability by proteins that bind AU-rich elements	1/8	85/8582	0.0765728	0.124151	0.101533	Psmb9	1
R-MMU-174143	APC/C-mediated degradation of cell cycle proteins	1/8	87/8582	0.0783109	0.124151	0.101533	Psmb9	1
R-MMU-4086400	PCP/CE pathway	1/8	87/8582	0.0783109	0.124151	0.101533	Psmb9	1
R-MMU-453276	Regulation of mitotic cell cycle	1/8	87/8582	0.0783109	0.124151	0.101533	Psmb9	1
R-MMU-5607764	CLEC7A (Dectin-1) signaling	1/8	90/8582	0.0809127	0.126562	0.103504	Psmb9	1
R-MMU-69052	Switching of origins to a post-replicative state	1/8	91/8582	0.0817785	0.126562	0.103504	Psmb9	1
R-MMU-5689603	UCH proteinases	1/8	96/8582	0.086097	0.131449	0.107501	Psmb9	1
R-MMU-69002	DNA Replication Pre-Initiation	1/8	97/8582	0.0869586	0.131449	0.107501	Psmb9	1
R-MMU-382556	ABC-family proteins mediated transport	1/8	99/8582	0.0886796	0.13159	0.107616	Psmb9	1
R-MMU-983705	Signaling by the B Cell Receptor (BCR)	1/8	100/8582	0.089539	0.13159	0.107616	Psmb9	1
R-MMU-202403	TCR signaling	1/8	102/8582	0.0912557	0.13159	0.107616	Psmb9	1
R-MMU-9020702	Interleukin-1 signaling	1/8	102/8582	0.0912557	0.13159	0.107616	Psmb9	1
R-MMU-69206	G1/S Transition	1/8	103/8582	0.092113	0.13159	0.107616	Psmb9	1
R-MMU-5610787	Hedgehog 'off' state	1/8	106/8582	0.0946807	0.133788	0.109414	Psmb9	1
R-MMU-5621481	C-type lectin receptors (CLRs)	1/8	108/8582	0.096389	0.134737	0.11019	Psmb9	1
R-MMU-6807070	PTEN Regulation	1/8	111/8582	0.0989461	0.13684	0.11191	Psmb9	1
R-MMU-446652	Interleukin-1 family signaling	1/8	115/8582	0.102346	0.139137	0.113788	Psmb9	1
R-MMU-69239	Synthesis of DNA	1/8	116/8582	0.103194	0.139137	0.113788	Psmb9	1
R-MMU-114608	Platelet degranulation	1/8	117/8582	0.104041	0.139137	0.113788	Serping1	1
R-MMU-2454202	Fc epsilon receptor (FCERI) signaling	1/8	118/8582	0.104888	0.139137	0.113788	Psmb9	1
R-MMU-76005	Response to elevated platelet cytosolic Ca2+	1/8	122/8582	0.108268	0.141525	0.115741	Serping1	1
R-MMU-69306	DNA Replication	1/8	123/8582	0.109111	0.141525	0.115741	Psmb9	1
R-MMU-3858494	Beta-catenin independent WNT signaling	1/8	124/8582	0.109954	0.141525	0.115741	Psmb9	1
R-MMU-453279	Mitotic G1 phase and G1/S transition	1/8	127/8582	0.112477	0.143353	0.117236	Psmb9	1
R-MMU-73887	Death Receptor Signaling	1/8	135/8582	0.119176	0.150416	0.123012	Tnfrsf1a	1
R-MMU-5358351	Signaling by Hedgehog	1/8	138/8582	0.121676	0.152096	0.124386	Psmb9	1
R-MMU-69242	S Phase	1/8	143/8582	0.12583	0.15579	0.127407	Psmb9	1
R-MMU-201681	TCF dependent signaling in response to WNT	1/8	150/8582	0.131617	0.161417	0.132009	Psmb9	1
R-MMU-9711123	Cellular response to chemical stress	1/8	158/8582	0.138189	0.167323	0.136839	Psmb9	1
R-MMU-69481	G2/M Checkpoints	1/8	159/8582	0.139007	0.167323	0.136839	Psmb9	1
R-MMU-69275	G2/M Transition	1/8	175/8582	0.15201	0.181296	0.148267	Psmb9	1
R-MMU-453274	Mitotic G2-G2/M phases	1/8	177/8582	0.153623	0.181555	0.148478	Psmb9	1
R-MMU-5689880	Ub-specific processing proteases	1/8	181/8582	0.156841	0.18298	0.149644	Psmb9	1
R-MMU-2467813	Separation of Sister Chromatids	1/8	182/8582	0.157644	0.18298	0.149644	Psmb9	1
R-MMU-8878171	Transcriptional regulation by RUNX1	1/8	190/8582	0.164044	0.188723	0.15434	Psmb9	1
R-MMU-68882	Mitotic Anaphase	1/8	218/8582	0.186107	0.211262	0.172773	Psmb9	1
R-MMU-2555396	Mitotic Metaphase and Anaphase	1/8	219/8582	0.186886	0.211262	0.172773	Psmb9	1
R-MMU-195721	Signaling by WNT	1/8	229/8582	0.194635	0.217118	0.177562	Psmb9	1
R-MMU-1257604	PIP3 activates AKT signaling	1/8	230/8582	0.195406	0.217118	0.177562	Psmb9	1
R-MMU-5688426	Deubiquitination	1/8	246/8582	0.20766	0.226855	0.185525	Psmb9	1
R-MMU-76002	Platelet activation signaling and aggregation	1/8	246/8582	0.20766	0.226855	0.185525	Serping1	1
R-MMU-71291	Metabolism of amino acids and derivatives	1/8	249/8582	0.209939	0.227434	0.185999	Psmb9	1
R-MMU-9006925	Intracellular signaling by second messengers	1/8	256/8582	0.215235	0.231244	0.189115	Psmb9	1
R-MMU-5673001	RAF/MAP kinase cascade	1/8	262/8582	0.21975	0.23416	0.191499	Psmb9	1
R-MMU-449147	Signaling by Interleukins	1/8	266/8582	0.222747	0.235092	0.192262	Psmb9	1
R-MMU-5684996	MAPK1/MAPK3 signaling	1/8	268/8582	0.224242	0.235092	0.192262	Psmb9	1
R-MMU-69620	Cell Cycle Checkpoints	1/8	277/8582	0.230937	0.240175	0.196418	Psmb9	1
R-MMU-983168	Antigen processing: Ubiquitination & Proteasome degradation	1/8	285/8582	0.236846	0.244365	0.199845	Psmb9	1
R-MMU-5683057	MAPK family signaling cascades	1/8	291/8582	0.241252	0.246951	0.20196	Psmb9	1
R-MMU-68886	M Phase	1/8	382/8582	0.305397	0.310169	0.25366	Psmb9	1
R-MMU-109582	Hemostasis	1/8	492/8582	0.376561	0.37948	0.310344	Serping1	1
R-MMU-69278	Cell Cycle Mitotic	1/8	498/8582	0.380252	0.380252	0.310975	Psmb9	1

[truncated: 62 more sheets: GO_DGA_MOL56_Early, GO_DGA_MOL56_Early_Peak, GO_DGA_MOL56_Late, GO_DGA_MOL56_Late_Ctrl, GO_DGA_MOL56_Late_Early, GO_DGA_MOL56_Late_Peak, GO_DGA_MOL56_Peak, GO_DGA_MOL56_Peak_Early, GO_DGA_MOL56_Peak_Late, GO_DGA_OPC_Early, GO_DGA_OPC_Early_Ctrl, GO_DGA_OPC_Late, GO_DGA_OPC_Late_Peak, GO_DGA_OPC_Peak, GO_DGA_OPC_Peak_Ctrl, GO_DGA_OPC_Peak_Early, GO_DGA_OPC_Peak_Late, GO_DGE_MOL2_Ctrl, GO_DGE_MOL2_Ctrl_Early, GO_DGE_MOL2_Ctrl_Late …]
