# Supplementary material for: Distinct transcriptomic and epigenomic responses of mature oligodendrocytes during disease progression in a mouse model of multiple sclerosis
Source: Nat Neurosci. 2025 Nov 17;28(12):2612–27. doi: 10.1038/s41593-025-02100-3 (PMC12672374; doi:10.1038/s41593-025-02100-3)
Supplement: Supplementary file 7 — Differential modality features between MOL5/MOL6 and MOL2. [file 41593_2025_2100_MOESM7_ESM.xlsx]

## Sheet: Summary
Supplementary Table 5. Differential modality features between MOL56 and MOL2
Naming of the sheets
MOL56	Differentially upregulated genes between MOL56 vs. MOL2 in each timepoint (Ctrl, Early, Peak and Late), using DESeq2 between subOLG population (MOL56/MOL2) with absolute log2FC > 1, pvalue adjusted < 0.01 and baseMean > 1
MOL2	Differentially upregulated genes between MOL2 vs. MOL56 in each timepoint (Ctrl, Early, Peak and Late), using DESeq2 between subOLG population (MOL2/MOL56) with absolute log2FC > 1, pvalue adjusted < 0.01 and baseMean > 1

## Sheet: MOL56
Genes differentially expressed between MOL56 vs. MOL2 at each timepoint
Ctrl	Early	Peak	Late
1700030L22Rik	2210011C24Rik	1500015L24Rik	1110015O18Rik
2210011C24Rik	2700033N17Rik	1700047M11Rik	2700033N17Rik
2700033N17Rik	4921516A02Rik	1700063D05Rik	2700081O15Rik
2700081O15Rik	4930408O17Rik	2700033N17Rik	4833422C13Rik
4930408O17Rik	4930419G24Rik	4930408O17Rik	4930408O17Rik
4930419G24Rik	4930445B16Rik	4930445B16Rik	4930419G24Rik
4930445B16Rik	4930592A05Rik	4930592A05Rik	4930452G13Rik
4930533B01Rik	5033421B08Rik	5033421B08Rik	4930517O19Rik
4930592A05Rik	9630013A20Rik	9330111N05Rik	4930592A05Rik
4932441J04Rik	A730020E08Rik	9330117O12Rik	4932441J04Rik
4933406I18Rik	A930017K11Rik	9330199G10Rik	4933406I18Rik
4933423P22Rik	Abca8a	A230001M10Rik	4933415A04Rik
5033421B08Rik	Abca8b	A630001O12Rik	5033421B08Rik
7630403G23Rik	Abcg2	A730020M07Rik	6330411D24Rik
9630013A20Rik	Ablim2	A830008E24Rik	7630403G23Rik
9630028H03Rik	Acot11	A930017K11Rik	9430041J12Rik
A330102I10Rik	Acsbg1	AW047730	9630013A20Rik
A730020E08Rik	Adamts1	Abca6	A330102I10Rik
A830052D11Rik	Adamts6	Abca8a	A830052D11Rik
A830082K12Rik	Adarb2	Abca8b	A830082K12Rik
A930017K11Rik	Adgrg1	Abcb4	A930017K11Rik
AW047730	Adgrg2	Abcb8	AC163347.1
Abca8a	Adgrl3	Acot11	AW011738
Abca8b	Aebp1	Acsbg1	Abca8a
Abcb1b	Agbl2	Acsl6	Abca8b
Abcg2	Angpt1	Adam1a	Abcg2
Ablim2	Ank1	Adamts20	Abr
Acot11	Ano4	Adamts6	Acot12
Ada	Antxr1	Adarb2	Acsbg1
Adamts1	Apeh	Adgrb1	Acsl3
Adamts5	Apoe	Adgrg2	Adam12
Adamts6	Arap2	Adgrv1	Adam18
Adarb2	Arc	Aldh1a1	Adamts1
Adgra3	Arhgap20	Amer2	Adamts5
Adgrg1	Arhgap24	Amph	Adamts6
Adgrg2	Asb13	Ano4	Adarb2
Adgrl1	Asic1	Antxr1	Add1
Adgrl3	Atg16l2	Arc	Adgra3
Adra1a	Atp1a2	Arhgap20	Adgrb1
Aebp1	B230209E15Rik	Arhgef26	Adgrg1
Afap1l2	B930095G15Rik	Arrdc3	Adgrg2
Agbl2	Bach2	Asrgl1	Adgrg3
Amotl1	Bcl2	Atg16l2	Adgrl3
Angpt1	Bex2	Atg4c	Adra1a
Ank1	Brinp1	Atp10b	Aebp1
Ankrd6	Brinp3	Atp1a2	Agbl2
Ano4	Brsk1	Auts2	Aldh1a7
Antxr1	C030029H02Rik	B230209E15Rik	Amer2
Anxa6	C130073E24Rik	B930095G15Rik	Amph
Apoe	Cacna2d3	BC051408	Angpt1
Aprt	Cadps	Baalc	Ankrd6
Arap2	Camk2n1	Bach2	Ano6
Arhgap20	Carmil1	Bex2	Antxr1
Arhgap24	Cav1	Bin1	Arhgap20
Arhgap26	Cavin3	C030017B01Rik	Arhgap20os
Arhgap42	Ccnd1	C030029H02Rik	Arhgap24
Arhgef19	Ccp110	C630043F03Rik	Arhgap42
Arhgef40	Ccser1	Cadps	Arhgef10l
Arpp21	Cd9	Calb2	Arhgef19
Asic1	Cdh6	Cavin4	Arhgef25
Atg16l2	Cdr2l	Ccdc13	Arl4c
Atp8a2	Cenpv	Ccdc190	Arpp21
Atrnl1	Cers6	Ccnjl	Arxes2
B230209E15Rik	Ckb	Ccp110	Asic1
B930095G15Rik	Clmn	Ccser1	Asic3
BC106179	Cnksr2	Cdh10	Aspdh
Baalc	Cntfr	Cdh6	Asphd2
Bbc3	Cntn1	Cdk5	Atg16l2
Bcl2	Cntn4	Cdr2l	Atp1a2
Bend6	Cobl	Chga	Atp8a2
Bend7	Col6a3	Chil1	Atrnl1
Bex2	Cp	Clmn	Auts2
Bhlhe22	Cpq	Cntfr	B230209E15Rik
Bmf	Creb5	Cobl	BC051142
Brinp3	Crmp1	Col6a3	Baalc
Brsk1	Csmd1	Cox7a1	Bach2
Btbd11	Cyp2j6	Creb5	Bbc3
Btbd16	Cyp2j9	Csmd3	Bend6
C030017B01Rik	Dag1	Cyp2j6	Bend7
C030029H02Rik	Dclk1	Cyp2j9	Bhlhe22
C230079O03Rik	Dct	Cyp3a13	Bmf
C77080	Ddx25	Daam1	Bmp1
Cables1	Dennd1b	Dab1	Bmp2
Cacna1h	Dner	Dapk2	Bmp5
Cacna2d3	Dpf3	Dbx2	Brinp3
Cacna2d4	Dpy19l3	Dcdc2a	Brsk1
Cadps	Dpyd	Dct	Btbd16
Camk2n1	Dscam	Depdc7	C030017B01Rik
Camk2n2	Dtx1	Dnah3	C130073E24Rik
Ccl27a	Dtx4	Dnah7b	C1qtnf6
Ccnd1	Dusp1	Dpf3	C77080
Ccser1	Dusp10	Dpyd	Cables1
Cd151	Ece1	Dscam	Cacna1d
Cd63	Efemp1	Dusp15	Cacna2d3
Cd9	Epas1	Dusp16	Cadps
Cdh13	Epb41	Dusp8	Camk2n1
Cdh4	Epha7	Ece1	Capn5
Cdh6	Erbb4	Efemp1	Capn6
Cdkn2c	Etv5	Enho	Caskin1
Cdr1os	Fads1	Epas1	Ccbe1
Cerk	Fam13c	Epdr1	Ccl27a
Cers4	Fam155a	Ephb2	Ccnjl
Chrna7	Fam184a	Erbb4	Ccp110
Chsy3	Farp1	Fabp7	Ccser1
Cib2	Fbn2	Far2	Cdh13
Clca4a	Fbxo7	Farp1	Cdh6
Clmn	Fbxw15	Fat4	Cdkn2a
Cmtm3	Fchsd2	Fbxo7	Cdkn2c
Cnksr2	Fmn1	Fbxw15	Chadl
Cntfr	Fut9	Flrt3	Chsy3
Cntn1	Gab3	Fn3k	Cldn10
Cntn4	Gabra3	Fndc5	Cnksr2
Col15a1	Gabrb3	Folh1	Cnmd
Col6a3	Gabrr2	Fut9	Cntfr
Cpq	Gbp4	G630016G05Rik	Cntn1
Cpxm2	Gbp6	Gab3	Cntn4
Crmp1	Gfod1	Gabra2	Cntn6
Csgalnact1	Gfra1	Gamt	Cobl
Csmd1	Gm10687	Gask1b	Col15a1
Csmd2	Gm10701	Gdap1	Col18a1
Csmd2os	Gm15584	Gfap	Col27a1
Cxcl14	Gm20619	Gjb6	Col6a1
Cyp2j6	Gm26519	Gjc3	Col6a3
Cyp2j9	Gm26728	Glrb	Col7a1
Dab1	Gm26854	Glul	Cpne8
Dag1	Gm29514	Gm10282	Cpq
Dck	Gm32568	Gm12324	Creb5
Dclk1	Gm42372	Gm12522	Csgalnact1
Dct	Gm42413	Gm14133	Csmd1
Ddx25	Gm42756	Gm20619	Csmd2
Dennd1b	Gm44850	Gm26728	Csmd2os
Dgat2	Gpc6	Gm28322	Ctps
Dlg4	Gria2	Gm29502	Cxxc4
Dlgap1	Gria3	Gm29642	Cyp2j6
Dll1	Grid1	Gm30015	Cyp2j8
Dnah7b	Grik3	Gm32509	Cyp2j9
Dner	Grm7	Gm32633	D930015M05Rik
Dntt	Hebp1	Gm33948	Daam1
Dock6	Hivep1	Gm36855	Dab1
Dok6	Hivep2	Gm41492	Dcbld1
Dpf3	Hmgcll1	Gm42372	Dck
Dpy19l3	Hoxa5	Gm42756	Dclk1
Dpyd	Hoxa7	Gm43242	Dct
Dscam	Hpcal1	Gm44866	Ddx25
Dtx1	Hr	Gm46515	Dennd1b
Dtx4	Hunk	Gm48370	Dennd2c
Dusp10	Ica1	Gm48371	Dgka
Ebf4	Ighm	Gm48508	Diaph3
Ece1	Il12rb1	Gm49066	Dio2
Eef1a2	Il33	Gm5535	Disp1
Efemp1	Irs1	Gm6145	Dlg4
Elfn2	Irx5	Gm9750	Dlgap1
Eno2	Itgad	Gmpr	Dll1
Epas1	Itpr1	Gpr158	Dmd
Epb41	Itpr2	Gpt	Dnah7b
Epha5	Jcad	Gria2	Dnah8
Epha7	Kalrn	Gria3	Dner
Ephb2	Kank1	Grm3	Dnm1
Erbb4	Kcna2	Grm7	Dntt
Extl3	Kcnb1	Gsta4	Dok6
Eya1	Kcnc3	Gstm6	Dpf3
Fads1	Kcnip1	Gstt1	Dpy19l3
Fads2	Kcnma1	Hcn2	Dpyd
Fam102b	Kctd16	Hectd2	Dscam
Fam13c	Kctd8	Hepacam	Dtx1
Fam155a	Kdm6b	Hhip	Dusp10
Fam184a	Kif21b	Hid1	Dusp7
Farp1	Kirrel2	Hist1h4h	Dyrk2
Fbn2	Kirrel3	Hivep1	Ebf4
Fbxo17	L3mbtl3	Hivep2	Ece1
Fbxw15	Lgi3	Hlf	Ece2
Fchsd2	Lhfpl2	Hoxa5	Efemp1
Fcnaos	Lmo4	Hoxc8	Elfn2
Fmn1	Lpin2	Hoxc9	Epas1
Fmn2	Lpp	Hpgd	Epb41
Fnbp1l	Lratd2	Igfbp2	Epha4
Fndc4	Lrp4	Ighm	Epha5
Foxj1	Lrrc4c	Jag1	Ephb2
Foxo6	Lrrc7	Kcna2	Ephb6
Foxp2	Lynx1	Kcnb1	Erbb3
Foxp4	Lypd6	Kcnip1	Erbb4
Fut9	Lypla2	Kcnq3	Fads1
G630016G05Rik	Maml2	Kctd16	Fads2
Gab3	Map3k1	Kdr	Fam129a
Gabbr2	Mapk8ip2	Kif21b	Fam155a
Gabra3	March1	Klhl13	Fam184a
Gabrb3	Mcam	Klhl4	Farp1
Gabrr2	Meis2	Lama2	Fat3
Gadd45b	Mpped2	Lgi3	Fbn1
Gap43	Mtr	Lhfpl2	Fbn2
Gas1	Nav3	Lrrc4c	Fbxl5
Gbp6	Nlgn1	Lrrc63	Fbxo17
Gfod1	Nlgn3	Lsamp	Fbxo7
Gfra1	Nol4	Lxn	Fbxw15
Gm10125	Nr2f1	Maneal	Fchsd2
Gm12002	Nr4a1	Map6d1	Fcnaos
Gm12526	Nrxn1	Map7d2	Fmn2
Gm12976	Nrxn3	Mapk4	Fnbp1l
Gm13963	Nsg1	Mapk8ip2	Foxp2
Gm15398	Nt5e	March1	Fut9
Gm15461	Ntrk2	Matn1	Fzd1
Gm15584	Nyap2	Mdk	G630016G05Rik
Gm16000	Ogdhl	Meis2	G630018N14Rik
Gm16233	Olig2	Mettl7a1	Gab3
Gm20515	Opalin	Mir9-3hg	Gabra2
Gm20619	Osbpl6	Mmd	Gabra3
Gm26519	P3h2	Mt3	Gabrr2
Gm26531	Pakap	Mtss2	Galnt16
Gm26543	Pakap.1	Ndrg2	Gfod1
Gm26691	Pantr1	Ndst4	Gfra1
Gm26728	Pcdh15	Nectin1	Gli3
Gm26747	Pcdh17	Nefm	Glis2
Gm29514	Pcdh19	Nkain4	Gm10687
Gm29927	Pcdh7	Nlgn1	Gm12526
Gm30541	Pcdhb7	Nlgn3	Gm12609
Gm32296	Pcolce2	Nmnat2	Gm12610
Gm32509	Pcsk2	Nr4a1	Gm12689
Gm33979	Pcsk2os1	Nt5e	Gm13889
Gm36001	Pcsk5	Ntrk2	Gm15496
Gm36849	Pde10a	Nyap2	Gm15527
Gm37459	Pdgfc	Ogdhl	Gm15584
Gm38251	Pdzrn4	Olig1	Gm15966
Gm41077	Pex5l	Omg	Gm16998
Gm41333	Phactr3	Osbpl6	Gm17473
Gm41764	Pid1	Oxr1	Gm19684
Gm42372	Plcb1	Pakap	Gm20619
Gm42413	Plcl2	Pantr1	Gm21860
Gm42756	Plcxd3	Pcdhb6	Gm26531
Gm43305	Plppr5	Pcolce2	Gm26658
Gm48003	Pnmal2	Pcsk2	Gm26691
Gm48006	Ppm1e	Pcsk2os1	Gm26747
Gm48239	Prickle1	Pde4a	Gm29502
Gm50012	Prkcq	Pde8a	Gm29514
Gm5087	Ptgds	Pdgfc	Gm29927
Gm536	Ptprj	Pdgfd	Gm30015
Gm597	Ptprn2	Pex5l	Gm30085
Gpc6	Ptprr	Phactr3	Gm32296
Grasp	Pvt1	Pkd1l1	Gm32509
Gria2	Qdpr	Plcb1	Gm32568
Grid1	Ralyl	Plcxd3	Gm33979
Grik3	Ramp1	Plppr5	Gm36849
Grm5	Rapgef3	Pls1	Gm36975
Grm7	Rasal1	Ppp1r3c	Gm38251
Gucy1a2	Rbbp8	Prex2	Gm4117
Hap1	Rgcc	Prickle1	Gm41764
Hebp1	Rhbdl3	Prkcq	Gm42372
Hectd2	Rhoq	Prps2	Gm42825
Hey1	Rnf128	Prr18	Gm43305
Hif3a	Rtn2	Pter	Gm44763
Hivep1	Scn8a	Ptgds	Gm46123
Hivep2	Sdc2	Ptn	Gm5087
Hmgcll1	Sel1l3	Ptprr	Gm536
Hoxa5	Sema3c	Qdpr	Gm5441
Hoxa7	Sema3d	Ralyl	Gm6145
Hoxc6	Sema6a	Ramp1	Gm7030
Hpcal1	Sfmbt2	Rapgef3	Gm9750
Hunk	Sgcz	Rasal1	Gng3
I730030J21Rik	Sgk2	Rev3l	Gpc6
Ica1	Sh2b2	Rnpep	Gpld1
Il33	Sh3gl2	Robo1	Gpx7
Inpp4a	Sh3pxd2a	Sbk1	Grasp
Irf2bpl	Shc3	Scg3	Gria2
Irs1	Slc13a1	Scn8a	Gria3
Irx5	Slc1a2	Sema6a	Gria4
Itga9	Slc35f1	Sept7	Grid1
Itgad	Slc38a1	Sfmbt2	Grik3
Itpr1	Slc38a2	Sfrp4	Grm7
Jag1	Slc4a10	Sgk2	Grsf1
Jam2	Smoc1	Sh3gl2	Gucy1a1
Jcad	Snap25	Slc1a2	Gucy1a2
Kalrn	Snx25	Slc35f1	Gucy2f
Kank1	Sorcs3	Slc43a2	Has2os
Kcna2	Sox6	Slc4a4	Hectd2
Kcnb1	Sparcl1	Slc6a1	Hey1
Kcnc3	Spock1	Slc6a11	Hivep1
Kcnd2	Srgap1	Slc7a10	Hivep2
Kcnh5	St8sia4	Slc7a15	Hmgcll1
Kcnh8	Stmn3	Smco3	Hnmt
Kcnj3	Stx1b	Snap25	Hoxa5
Kcnma1	Stxbp5l	Soga1	Hoxa7
Kcnn2	Syn2	Sorcs1	Hoxa9
Kcnq5	Syn3	Sparcl1	Hoxb3os
Kcnrg	Syne1	Spock1	Hoxb4
Kctd16	Tbc1d30	Spock3	Hoxc4
Kctd8	Tent5a	St8sia3os	Hoxc5
Kdm6b	Thbs2	Stard13	Hoxc6
Khdrbs2	Them6	Stxbp5l	Hoxc9
Kif21b	Thrb	T2	Hpgd
Kirrel2	Timp2	Tbc1d16	Ica1
Kirrel3	Timp3	Tbc1d30	Ick
Kit	Timp4	Tenm2	Igfbpl1
Klf10	Tma16	Tgfb3	Il17rd
Klf12	Tmem132d	Timp3	Il1rapl1
Klhl13	Tmem196	Timp4	Inava
Klhl32	Tmem64	Tle1	Inpp4a
Large1	Tmod1	Tmem229a	Iqsec2
Lcp1	Tnni1	Tnfrsf19	Irx2
Lctl	Trhde	Trib2	Irx5
Lgi2	Trib2	Tril	Islr
Lhfpl2	Tril	Trim16	Itgad
Lmtk3	Tspan6	Trpm3	Itih3
Lpin2	Tspyl5	Trpv3	Itpr1
Lpp	Ttyh1	Tsc22d3	Itpr2
Lrp4	Tub	Tspan2	Jag1
Lrrc4c	Usp2	Ttyh1	Jam2
Lrrc63	Ust	Usp30	Jcad
Lrrc7	Vangl1	Vangl1	Jhy
Lrrfip1	Wasf3	Wasf3	Kank1
Lrtm1	Wfdc18	Wfdc18	Kcna2
Lsamp	Ypel4	Wfikkn2	Kcnb1
Ltbp4	Zeb1	Zfp488	Kcnd2
Lurap1l	Zfp488		Kcnh8
Lynx1	Zfp516		Kcnj3
Lypd6	Zfp521		Kcnma1
Madd	Zfp711		Kcnq5
Maml2	Zfpm2		Kctd16
Man1a			Kctd8
Map3k1			Kdm6b
Map3k14			Kdm6bos
March3			Khdrbs2
Mark1			Kif21b
Mcam			Kif22
Meis2			Kif26a
Meis3			Kirrel3
Met			Kit
Mgat5			Klf10
Mgst1			Klf12
Mpp6			Klhl13
Mpped2			Krt222
Mroh3			L3mbtl3
Mt1			Lad1
Myc			Lctl
Myo18a			Lhfpl2
Nav3			Lims2
Nckap5			Lmtk3
Nectin2			Loxl3
Nefl			Lpin2
Nexmif			Lratd2
Nfatc1			Lrp1
Nhlrc4			Lrp4
Nim1k			Lrrc7
Nlgn1			Lrrtm2
Nlgn3			Lrrtm4
Nol4			Lsamp
Notch1			Ltbp4
Nova2			Lurap1l
Npas3			Lypd6
Npr1			Lysmd2
Npr2			Madd
Npsr1			Man1a
Nr2f1			Mark1
Nr2f2			Mcam
Nr4a1			Me3
Nrcam			Meis2
Nrg1			Mgat5
Nrtn			Mgmt
Nrxn1			Mgst1
Nsg1			Mir9-3hg
Nsg2			Mmp16
Nt5e			Mppe1
Ntrk2			Mpped2
Nudt4			Mr1
Nupr1			Mroh3
Nyap2			Msx2
Oaf			Mxra7
Ogdhl			Myo16
Olig2			Nat8l
Opalin			Nav3
Ophn1			Nckap5
Osbpl10			Ndst4
Osbpl6			Nefl
P3h2			Nefm
Pakap			Nexmif
Pakap.1			Nfatc1
Parvb			Nhsl1
Patj			Nim1k
Pawr			Nlgn1
Pcdh15			Nlgn3
Pcdh17			Nol4
Pcdh19			Nova2
Pcdh7			Npr1
Pcdhb5			Npr2
Pcdhb9			Nr2f1
Pcsk2			Nr4a1
Pcsk2os1			Nrcam
Pcsk5			Nrg1
Pde10a			Nrxn1
Pde3b			Nsg2
Pdgfc			Nt5e
Pdzrn4			Ntrk2
Pex5l			Nyap2
Pfkp			Nynrin
Phactr3			Ogdhl
Phlda1			Olfr671
Pid1			Olig1
Pknox2			Olig2
Plcb1			Opcml
Plcxd3			Ophn1
Plekha1			Osbpl6
Plekhg5			P3h2
Plin4			Pakap.1
Plp2			Pantr1
Plppr5			Parvb
Plxnb2			Pcdh17
Pnmal1			Pcdh19
Pnmal2			Pcdh7
Polm			Pcdha1
Pou6f1			Pcdhb3
Ppara			Pcsk2
Ppfia3			Pcsk5
Ppfibp1			Pde10a
Ppm1e			Pde3a
Ppp2r2b			Pde3b
Pqlc1			Pde4a
Prdm5			Pde8b
Prickle1			Pdgfc
Prickle3			Pdxk
Prkab2			Peg3
Prkar2b			Pex5l
Prkce			Pfkp
Prom1			Phactr3
Prss12			Phlda1
Ptgds			Pilrb2
Ptpn14			Pip5k1b
Ptprg			Pitpnc1
Ptprj			Pknox2
Ptprn2			Plcb1
Ptpro			Plcxd3
Ptprr			Plekha1
Ptprt			Plekhg5
Pvt1			Plod2
Rab34			Plpp3
Rab44			Plppr5
Rai2			Pnmal1
Ralgps2			Pnmal2
Ramp1			Ppfia3
Rapgef3			Ppm1e
Rapgef3os2			Ppp1r3c
Rasal1			Ppp2r2b
Rbbp8			Prdm16
Rbfox1			Prex1
Reep1			Prickle1
Rel			Prkab2
Reln			Prkar2b
Rgcc			Prkce
Rgs17			Prkcq
Rgs9			Prom1
Rhbdl3			Prr16
Rhoj			Prss12
Rhoq			Ptgds
Rims2			Ptn
Rnf128			Ptpn14
Rnf150			Ptprg
Rragd			Ptprj
Rras			Ptprn2
Rtn2			Ptpro
Runx2			Ptprr
Ryr2			Pvt1
Scn8a			Pygo1
Sdc2			Rab33a
Sdc3			Rab34
Sel1l3			Rabl2
Sema3c			Rai2
Sema3d			Rap1gap
Sema3e			Rapgef3
Sema4f			Rarb
Sema6a			Rasal1
Serinc5			Rasgef1b
Sfmbt2			Rbbp8
Sfrp4			Reep1
Sh2d3c			Rel
Sh3bp2			Rgs9
Sh3gl2			Rhbdl3
Sh3pxd2a			Rimklb
Shc3			Rims2
Shc4			Rnf128
Slc12a8			Rnf150
Slc13a1			Robo2
Slc18b1			Rtl5
Slc19a2			Rtn2
Slc1a1			Runx2
Slc2a3			Ryr2
Slc35f1			Satb1
Slc38a1			Sbk3
Slc38a2			Scg3
Slc44a5			Scn3a
Slc4a10			Scn8a
Slc5a5			Sdc2
Slc6a15			Sel1l3
Slc7a15			Sema3d
Slc9a3r2			Sema4f
Slc9a7			Sema6a
Slitrk3			Sema6b
Slitrk5			Serinc5
Smad3			Sfmbt2
Smco4			Sfrp4
Smoc1			Sgcd
Smtn			Sgk1
Snap25			Sgk2
Snx25			Sh3bp2
Sorcs2			Sh3gl2
Sorcs3			Sh3gl3
Sox6			Sh3pxd2a
Spink10			Sh3rf3
Spock1			Shc3
Spred3			Shc4
Srgap1			Shisal1
St3gal1			Shpk
St8sia1			Slc12a8
St8sia4			Slc13a1
Stmn3			Slc16a13
Stx1b			Slc18b1
Stx3			Slc19a2
Stxbp5l			Slc1a1
Svep1			Slc1a2
Sycp2			Slc35f1
Syn3			Slc38a1
Syne1			Slc38a2
Synpr			Slc44a5
Syt16			Slc4a10
Tac1			Slc4a4
Taf4b			Slc6a11
Tagln2			Slc6a15
Tap2			Slc6a19
Tbc1d1			Slc7a10
Tdrd9			Slc9a7
Tent5a			Slitrk1
Thbs2			Slitrk2
Thrb			Slitrk3
Thsd1			Slitrk5
Timp2			Smad6
Timp3			Smad9
Tmem132d			Snap25
Tmem136			Snap91
Tmem178			Snx25
Tmem196			Soga1
Tmem64			Sorcs2
Tmod1			Sorcs3
Tnfrsf12a			Sox5
Tnfrsf19			Sox6
Tnik			Sparcl1
Trerf1			Spats2
Trhde			Sppl2b
Trib2			Srgap1
Trio			St8sia1
Tshz3			Stard13
Tspan12			Steap2
Tspan6			Stx1b
Tspyl5			Stxbp5l
Ttc9			Svil
Ttyh1			Sycp2
Tub			Syne1
Ust			Synpr
Vangl1			Syt4
Vegfc			Sytl5
Vsnl1			Tacc2
Wasf3			Tbc1d30
Wfdc18			Tbc1d8
Xylt1			Tcf7l1
Ypel4			Tcf7l2
Zeb1			Tdrd9
Zfp469			Tenm1
Zfp488			Tent5a
Zfp516			Thbs2
Zfp521			Thrb
Zfp667			Timp3
Zfp711			Tlcd1
Zfp804a			Tma16
Zfpm2			Tmem141
			Tmem163
			Tmem164
			Tmem178
			Tmem196
			Tmem198b
			Tmem200c
			Tmem64
			Tmod2
			Tnfrsf19
			Tnik
			Trerf1
			Trhde
			Trib2
			Trio
			Trpc3
			Tshz2
			Tshz3
			Tspan12
			Tspan6
			Tspyl5
			Ttc9
			Ttll5
			Ttyh1
			Tub
			Ust
			Vangl1
			Wasf3
			Wfdc18
			Wtip
			Zan
			Zfp184
			Zfp488
			Zfp516
			Zfp521
			Zfp641
			Zfp667
			Zfp711
			Zfp804a
			Zfp804b
			Zfp810
			Zfp947
			Zfpm2
			Zswim5

## Sheet: MOL2
Genes differentially expressed between MOL2 vs. MOL56 at each timepoint
Ctrl	Early	Peak	Late
1700016K05Rik	2210408F21Rik	1110038B12Rik	1700057H15Rik
1700042O10Rik	2510009E07Rik	2010300C02Rik	1810062G17Rik
1700057H15Rik	2700046A07Rik	2210408F21Rik	2010300C02Rik
1700066B17Rik	2900026A02Rik	2310002F09Rik	2010310C07Rik
1810062G17Rik	4930579M01Rik	2410006H16Rik	2210408F21Rik
2310002F09Rik	4930587E11Rik	2510002D24Rik	2310002F09Rik
2510009E07Rik	4932435O22Rik	2610307P16Rik	2310014F06Rik
2700046A07Rik	4933406C10Rik	2810029C07Rik	2310047D07Rik
2900026A02Rik	6030407O03Rik	2900026A02Rik	2510009E07Rik
4921528I07Rik	6430503K07Rik	9030025P20Rik	2610307P16Rik
4930444F02Rik	A330072L02Rik	9630014M24Rik	2700046A07Rik
4930500A05Rik	A530053G22Rik	A930006I01Rik	2810032G03Rik
4930579M01Rik	A930006I01Rik	AC106834.1	2810455O05Rik
4930587E11Rik	AC163638.2	AI504432	2900026A02Rik
4930594M22Rik	Abcb9	Abca5	4632428C04Rik
4932435O22Rik	Abcc4	Abcc4	4921528I07Rik
4933406C10Rik	Acss1	Acat3	4930444P10Rik
4933430I17Rik	Acy3	Acsl5	4930579M01Rik
6030407O03Rik	Adam11	Adam11	4930587E11Rik
6330403L08Rik	Adam23	Adamts9	4930594M22Rik
6430548M08Rik	Adgrb3	Adgra1	4932435O22Rik
A330008L17Rik	Adgrg6	Adgra2	6030407O03Rik
A330072L02Rik	Adhfe1	Adgrb2	6330403L08Rik
A530053G22Rik	Aff3	Adm	6430548M08Rik
A930004D18Rik	Agmo	Aff3	8030451A03Rik
A930006I01Rik	Ajap1	Agtrap	A330008L17Rik
A930028N01Rik	Ak5	Ahnak	A330072L02Rik
AC106834.1	Aldh1l2	Ahr	A330093E20Rik
AC163638.2	Aldh2	Ajap1	A830019P07Rik
AI504432	Aldoc	Ak5	A930004D18Rik
Abcb10	Amigo1	Aldh18a1	A930028N01Rik
Abcb9	Ankrd23	Aldh1l1	AC106834.1
Abcc4	Anxa5	Aldh1l2	AC109619.1
Acat3	Anxa7	Aldoc	AI197445
Acy3	Apba2	Alpk1	AI504432
Adam11	Aqp11	Amotl1	Aass
Adam23	Arfgef3	Anxa11	Abcb9
Adgrb3	Arhgef37	Anxa2	Abcc4
Adprhl1	Arntl2	Anxa5	Ablim3
Aff3	Arrb1	Anxa7	Acaa2
Agmo	Art3	Apba2	Actn1
Ak5	Asb5	Arfgef3	Acy1
Akr1c13	Astn2	Arhgap28	Acy3
Aldh1l2	Atp8b5	Arhgef3	Adam11
Aldh3b2	Aven	Arid5a	Adam23
Aldoc	B3galnt1	Arl4c	Adgrb3
Alk	B430319H21Rik	Arntl2	Adgrg6
Amigo1	B4galt6	Arrb1	Adhfe1
Anln	B630019K06Rik	Arrdc4	Adm
Anxa5	BC028528	Art3	Adra1b
Anxa7	Bace2	Asns	Aff3
Apba2	Bambi	Astn1	Agmo
Apod	Barx2	Astn2	Ahr
Arfgef3	Basp1	Atcay	Airn
Arhgef37	Bcr	Atf3	Ajap1
Arhgef6	C230038L03Rik	Atf5	Ak5
Arntl2	C2cd4b	B4galnt1	Aldh1l1
Art3	C530008M17Rik	B4galt5	Aldh1l2
Asap3	Cacna1a	B4galt6	Aldh2
Astn1	Cacna1b	B630019K06Rik	Aldoc
Atp8b5	Cacna1c	Bace2	Alk
Aven	Cacna2d1	Baiap2	Alpk1
B3galnt1	Cacnb3	Bambi	Amigo1
B3gnt4	Car5b	Barx2	Angptl3
B430319H21Rik	Carns1	Basp1	Ankrd42
B4galt6	Casc4	Baz1a	Anxa5
B630019K06Rik	Casq1	Bcan	Anxa7
BC028528	Cbs	Bcat2	Apba2
Bace2	Ccdc148	Bcr	Aqp11
Bambi	Ccdc160	Bid	Arfgef3
Barx2	Ccdc187	Birc3	Armc3
Basp1	Ccdc3	Bmp7	Arntl2
Bcl11b	Ccdc85c	Bmper	Arrb1
Begain	Ccdc88c	Brinp2	Arrdc4
Bgn	Ccn4	Btc	Art3
Brca1	Ccsap	Btg1	Atf5
C230038L03Rik	Ccz1	C1ql2	Atp8b5
C4b	Cd27	C1qtnf1	Aven
C530008M17Rik	Cd44	C1ra	B3galnt1
Cacna1b	Cd55	C2	B3gat1
Car5b	Cd59a	C530008M17Rik	B430319H21Rik
Carns1	Cd59b	Cacna1a	B4galt6
Casc4	Cd86	Cacna1b	B630019K06Rik
Casq1	Cdc14a	Cacna1c	BC028528
Cbs	Cdc42ep4	Cacna1h	Bace2
Ccdc152	Cdh8	Cacna2d1	Bambi
Ccdc160	Cdkn1c	Cacnb3	Barx2
Ccdc187	Cds1	Cacng5	Basp1
Ccdc85a	Ceacam1	Camk2d	Bcl11b
Ccdc85c	Celsr2	Capn1	Begain
Ccdc88c	Cers1	Car5b	Bglap2
Ccn4	Cfap410	Casp12	Bhlhe41
Ccsap	Chst2	Casp4	Bik
Cd300lf	Clca3a1	Cast	Bmp7
Cd34	Clcf1	Casz1	Bmper
Cd55	Clgn	Cbs	Brca1
Cd59a	Clrn1	Ccdc134	Brinp2
Cd59b	Clstn2	Ccdc141	C230038L03Rik
Cdc42ep4	Cntn3	Ccdc148	C530008M17Rik
Cdca8	Cntn6	Ccdc3	Cacna1a
Cdh8	Col11a2	Ccdc30	Cacna1b
Cdkn1a	Col1a2	Ccdc85c	Cacna2d1
Cdkn1c	Col22a1	Ccdc88c	Car13
Cds1	Col23a1	Ccn4	Car5b
Ceacam1	Col27a1	Ccnd1	Casq1
Cebpb	Col6a2	Ccz1	Cast
Cenpm	Col9a1	Cd109	Casz1
Cfap410	Colgalt2	Cd151	Cbln1
Cftr	Coro2b	Cd200	Cbs
Chil1	Cpne2	Cd24a	Ccdc148
Chp2	Cpt2	Cd38	Ccdc152
Chst12	Crip2	Cd44	Ccdc160
Chst2	Crtac1	Cd55	Ccdc3
Ciart	Crybb1	Cd59a	Ccdc40
Cldn14	Crybg3	Cd59b	Ccdc85a
Clgn	Csdc2	Cd63	Ccdc85c
Clic5	Ctdspl	Cdc14a	Ccdc88c
Clrn1	Cth	Cdh13	Ccn4
Cltrn	Ctnna2	Cdh8	Ccne1
Cntn3	Cyfip2	Cdkn1c	Ccsap
Col11a2	Cyp39a1	Cebpa	Ccz1
Col1a2	Cyp4f14	Cela1	Cd300lf
Col2a1	D430040D24Rik	Celf4	Cd55
Col6a2	D630003M21Rik	Celsr1	Cd59a
Col9a1	Dab2ip	Cemip	Cd59b
Colec11	Dcx	Cfap410	Cd86
Colgalt2	Ddah2	Cfap44	Cdc14a
Coro2b	Deptor	Cfap47	Cdc42ep4
Cpne2	Dlc1	Cfap74	Cdh8
Cpox	Dlg5	Chl1	Cdkn1c
Crip1	Dmrta1	Chst2	Cds1
Crip2	Dna2	Ciita	Ceacam1
Crybb1	Dnaic2	Ckap4	Cfap410
Crybg3	Dock2	Clca3a1	Cfap74
Csdc2	Dock7	Clcf1	Chil1
Csf1	Dok7	Cldn12	Chmp2b
Ctdspl	Dpysl5	Clec2d	Chp2
Ctnna2	Duxbl3	Clgn	Chst2
Ctsh	Ecm2	Clic1	Clgn
Cyfip2	Eepd1	Clic5	Clrn1
Cyp27a1	Efcc1	Clrn1	Clstn2
Cyp2d22	Efhd2	Cmtm3	Cntn3
Cyp2j12	Efs	Cntf	Col1a2
Cyp39a1	Egfem1	Cntn3	Col22a1
Cyp4f14	Ehd4	Col1a2	Col23a1
D630003M21Rik	Ehhadh	Col23a1	Col2a1
Dab2ip	Eif4ebp1	Col27a1	Col5a2
Dchs2	Elavl4	Col2a1	Col5a3
Dclk3	Enc1	Col5a3	Colgalt2
Ddah2	Enpp3	Col6a1	Cotl1
Ddc	Enpp6	Col6a2	Cpd
Ddias	Epha1	Col7a1	Cpe
Depdc1b	Epha10	Colgalt2	Cpne2
Deptor	Ephx1	Comtd1	Crip1
Dglucy	Erp27	Cotl1	Crip2
Dipk1c	Esyt3	Cpe	Crlf2
Dlc1	Ets1	Cpne2	Crybg3
Dlg5	Evl	Crip2	Csdc2
Dlx1as	Faah	Crlf1	Ctdspl
Dmrta1	Fam114a1	Crlf2	Ctnna2
Dmrtc1a	Fam129b	Crtac1	Cyfip2
Dock2	Fam131b	Csdc2	Cyp2d22
Dock7	Fam135b	Cspg5	Cyp39a1
Dok7	Fam241b	Cthrc1	Cyp4f14
Dpysl5	Fam43a	Ctsd	D430040D24Rik
Dusp18	Fam83b	Ctxn1	Dab2ip
Duxbl3	Faxc	Cyfip2	Dbn1
E2f8	Fbln2	Cyp26b1	Ddah2
Eda	Fgd4	Cyp39a1	Ddias
Eepd1	Fgfr1	D630045J12Rik	Dgkh
Efcc1	Fibin	Dab2ip	Dglucy
Efhd2	Flnb	Dagla	Dhrs3
Efr3b	Flot1	Dap	Diras1
Efs	Flrt1	Ddit3	Dlc1
Egfem1	Fmnl3	Dgka	Dlg5
Ehhadh	Fntb	Dgkh	Dmrta1
Elavl4	Fzd9	Dhrs13	Dock2
Emp1	G630055G22Rik	Dhrs3	Dock7
Enc1	Galnt12	Dlc1	Dok7
Enpp3	Galnt13	Dlg5	Dpysl5
Enpp6	Galnt18	Dock7	Drc1
Epb41l2	Galnt3	Dok5	Dusp18
Epha1	Galnt4	Dpysl5	Duxbl3
Epha10	Garnl3	Dram1	Eda
Ephx1	Gas2l3	Drc1	Eepd1
Esrp1	Gas6	Dusp18	Efcc1
Esyt3	Gdf15	Dusp6	Efhd2
Evl	Ggta1	Ecm1	Efr3b
Faah	Gldc	Eef2kmt	Efs
Fam131b	Gldn	Eepd1	Egfem1
Fam135b	Gls2	Efhb	Elavl4
Fam178b	Gm10561	Efhd2	Emp1
Fam20c	Gm11099	Efs	Enc1
Fam43a	Gm12326	Egfem1	Enpp3
Fam83b	Gm13403	Egln3	Enpp6
Fam83f	Gm13546	Egr1	Epha1
Faxc	Gm14532	Ehd4	Epha10
Fbln2	Gm15672	Eif4e3	Ephx1
Fbln7	Gm15853	Eif4ebp1	Erbb2
Fgd4	Gm16083	Elavl4	Erp27
Fgf7	Gm16152	Elf4	Esrrg
Fgfr1	Gm16638	Emp1	Esyt3
Fgfr4	Gm17135	Emp3	Etl4
Fgfrl1	Gm2415	Enc1	Evl
Fhit	Gm26673	Endod1	Ezr
Fibin	Gm26834	Eno2	Faah
Flrt1	Gm26901	Enpp6	Fam114a1
Fmnl3	Gm2694	Epha10	Fam129b
Fntb	Gm29455	Ephx1	Fam131b
Frzb	Gm29773	Eps8	Fam135b
Fxyd3	Gm30173	Erbb2	Fam180a
Fzd9	Gm32005	Erlin1	Fam20c
G630055G22Rik	Gm32122	Ermard	Fam241b
Galnt13	Gm32926	Erp27	Fam43a
Galnt3	Gm34408	Esyt3	Fam83b
Galnt4	Gm35850	Ets2	Fam83f
Garnl3	Gm38560	Etv4	Faxc
Gbp7	Gm39090	Evl	Fbln1
Gfap	Gm43154	Eya4	Fbln2
Ggta1	Gm45600	Fam114a1	Fbln7
Gjb2	Gm48163	Fam129b	Fbxl2
Gls2	Gm49042	Fam135b	Fbxl7
Gm10561	Gm49289	Fam180a	Fgd4
Gm12326	Gm7276	Fam210b	Fgfr1
Gm13373	Gm7967	Fam241b	Fgfr4
Gm13403	Gnasas1	Fam3c	Fgfrl1
Gm13404	Gng8	Fam43a	Fibin
Gm13546	Gpd2	Fam83b	Filip1
Gm15853	Gpr137b	Fam83f	Flot1
Gm15910	Gpr176	Faxc	Flrt1
Gm16083	Gpr27	Fbln1	Fmnl3
Gm16152	Gpr35	Fbln2	Fntb
Gm16193	Gpr45	Fbxl7	Fos
Gm16638	Gpsm1	Fbxo31	Frem2
Gm17552	Gramd1c	Fgd4	Frmpd1
Gm20631	Gramd2	Fgfr1	Fstl3
Gm2350	Greb1l	Fgfr4	Fxyd1
Gm2415	Grik1	Fgfrl1	Fxyd5
Gm2447	Grm1	Fhod3	Fxyd7
Gm26588	Grm4	Fjx1	Fzd9
Gm26834	Gulp1	Fkbp7	Galnt10
Gm2694	H19	Flnb	Galnt12
Gm27008	Hbegf	Flnc	Galnt18
Gm28782	Hdac9	Flot1	Galnt3
Gm28875	Hes3	Fmnl3	Galnt4
Gm29455	Hip1r	Fndc3b	Gapdh
Gm30173	Hivep3	Fndc4	Gas2l3
Gm32005	Hmcn1	Fos	Gas6
Gm32122	Hmgcs1	Fosb	Ggta1
Gm32926	Hopx	Fosl2	Gldn
Gm34408	Hrk	Fxyd5	Gls2
Gm35867	Hspg2	Fyb	Gltp
Gm36356	Htra3	Gadd45a	Gm11099
Gm36756	Id4	Gadd45b	Gm11638
Gm38560	Igf2bp2	Gadd45g	Gm12326
Gm41335	Igsf3	Galnt18	Gm12394
Gm42205	Ildr1	Galnt3	Gm13403
Gm42695	Insyn2b	Gas2l1	Gm13404
Gm43154	Ippk	Gas2l3	Gm13830
Gm44997	Itga3	Gbp2	Gm13844
Gm45338	Itga8	Gbp4	Gm14532
Gm45356	Itih5	Gbp5	Gm15672
Gm45600	Jpt2	Gbp8	Gm15675
Gm4793	Kank2	Gbp9	Gm15853
Gm48163	Kcna4	Gdf11	Gm16083
Gm48646	Kcnh2	Gdf15	Gm16152
Gm48742	Kcnk5	Ggta1	Gm16638
Gm49042	Kcnn3	Ghr	Gm17135
Gm49969	Kctd15	Gldc	Gm17399
Gm50323	Kdm4d	Gldn	Gm20631
Gm50368	Kif19a	Gm10561	Gm2164
Gm7967	Kif5a	Gm11099	Gm2350
Gm9922	Klf16	Gm11290	Gm2415
Gmnn	Klk6	Gm13889	Gm2447
Gnaz	Lamc1	Gm16083	Gm26862
Gng8	Lcat	Gm16183	Gm2694
Gpd2	Ldhb	Gm17135	Gm27008
Gpr137b	Ldlrap1	Gm19744	Gm29083
Gpr176	Lgi4	Gm20631	Gm29455
Gpr27	Lhfp	Gm2164	Gm30173
Gramd1c	Lmna	Gm2245	Gm32005
Greb1l	Lmo7	Gm26532	Gm32061
Grik1	Lonrf2	Gm26673	Gm32122
Grm4	Lonrf3	Gm26834	Gm32926
Gsn	Lpar3	Gm29684	Gm33037
Gtsf2	Lpcat2	Gm32005	Gm34006
H1fx	Lpo	Gm32122	Gm34408
Hbegf	Lrch1	Gm32926	Gm34776
Hdac9	Lrrc75b	Gm34006	Gm35850
Hip1r	Lrrtm1	Gm3417	Gm36356
Hivep3	Lsm11	Gm36107	Gm38560
Hmcn1	Ly6g6d	Gm38560	Gm39090
Hopx	Ly6g6e	Gm40841	Gm41836
Hspg2	Ly6g6f	Gm41505	Gm42788
Htra3	Maged2	Gm43066	Gm43154
Hykk	Magee2	Gm43154	Gm44997
Id4	Man1c1	Gm47316	Gm45600
Iffo2	Map1b	Gm49492	Gm45639
Ifit2	Map2k6	Gm49890	Gm48646
Ifit3	Marcksl1	Gm49891	Gm48682
Ifnar2	Mboat1	Gm50020	Gm48742
Igf2bp2	Mcf2l	Gm7967	Gm49267
Igsf3	Me1	Gnaz	Gm49289
Il17b	Metrnl	Gpc1	Gm49890
Ildr1	Mfge8	Gpnmb	Gm49891
Inka1	Mfsd4b1	Gpr137b	Gm6209
Insyn2b	Mgat5b	Gpr143	Gm6999
Ippk	Mgll	Gpr151	Gm7276
Itga3	Mgst3	Gpr176	Gm7967
Itgb3	Micall2	Gpr37l1	Gm8739
Itgb4	Mid1	Gpx3	Gmnn
Itgb5	Mkx	Gramd1c	Gnaz
Itih5	Mmd2	Greb1	Gng8
Jpt2	Mmp15	Greb1l	Gpd2
Kank2	Mmp2	Grip1	Gpr137b
Kcna4	Mn1	Gsap	Gpr143
Kcnk1	Mob3b	Gsdma	Gpr176
Kcnk5	Moxd1	Gtsf2	Gpx3
Kcnmb4	Mrgpre	Hbegf	Gramd1c
Kcnq1	Msn	Hdac9	Greb1
Kcnq1ot1	Mtcl1	Hes3	Greb1l
Kcnq4	Mtmr7	Hilpda	Grik1
Kctd15	Mtss1	Hk2	Gulp1
Kif19a	Mvd	Hmcn1	Gxylt2
Kif26b	Myh7b	Hmga1	Hbegf
Kif7	Mylip	Hmgb3	Hcn1
Klf16	Myo10	Hopx	Hdac9
Klhl10	Myo1e	Hrh2	Hes3
Klhl35	Myof	Hs3st3b1	Hk2
Klk6	Myrip	Hspa2	Hmcn1
Lancl3	Myzap	Hspb1	Hmga1
Lbh	Napepld	Hspb8	Hmox1
Lcat	Ncapd2	Hspg2	Hopx
Ldhb	Nck2	Htatip2	Hs3st5
Ldlrap1	Ncs1	Id1	Hspb1
Lgi4	Nebl	Ido2	Hspb8
Lmna	Nedd4l	Ier2	Htra3
Lmntd1	Nedd9	Ier3	Id1
Lmo7	Nell2	Ier5l	Id4
Lonrf3	Nid1	Iffo2	Iffo2
Lpar3	Ninj1	Ifi27l2a	Igf2bp2
Lpcat2	Nkx2-9	Ifi44	Igf2r
Lrch1	Nlgn2	Ifi47	Igsf3
Lrp11	Npb	Ifit2	Il16
Lrrc27	Nppc	Ifngr2	Il17b
Lurap1	Nqo1	Igdcc4	Ildr1
Ly6g6d	Nsun7	Igf2bp2	Inka1
Ly6g6e	Olfm1	Igf2r	Insyn2b
Ly6g6f	Olfml2b	Igsf3	Itga3
Lypd6b	Orai1	Il10rb	Itga5
Man1c1	P2ry12	Il15ra	Itga8
Maob	Pacsin1	Il17b	Itgb3
Map2k6	Padi2	Il34	Itgb5
Mapre2	Pak3	Il3ra	Itprid1
Marcksl1	Pald1	Il4ra	Itpripl2
Masp1	Palm	Inppl1	Jph3
Matn2	Paqr6	Irak1bp1	Jpt2
Mboat1	Paqr7	Irf8	Kank2
Mef2c	Pard3b	Itga7	Kbtbd11
Mfge8	Pde11a	Itga8	Kcnh2
Mfsd4b1	Pde5a	Itga9	Kcnk5
Mgat5b	Pdgfa	Itprid1	Kcnmb4
Mgll	Pdk1	Itpripl2	Kcnn3
Mgst3	Pdlim1	Jazf1	Kcnq1ot1
Micall2	Pdlim3	Jun	Kcnq4
Mid1	Peli2	Junb	Kctd14
Mkx	Pfkl	Kank2	Khdrbs3
Mmd2	Piezo1	Kbtbd11	Kif7
Mmp15	Piezo2	Kcna4	Klf4
Mmp2	Pkia	Kcnh2	Klf8
Mn1	Pla2g4a	Kcnip3	Klk12
Mns1	Plet1os	Kcnj12	Klk7
Mob3b	Plin3	Kcnj6	Klk9
Mrgpre	Plpp1	Kcnk5	Lama5
Msn	Plpp2	Kctd10	Lbh
Msrb3	Pmp22	Kctd15	Lbp
Mtcl1	Poc1a	Kif19a	Ldhb
Mtmr7	Podxl	Kif5a	Lgi4
Mtss1	Podxl2	Klc2	Lmna
Mycn	Poglut3	Klf4	Lmntd1
Myh7b	Ppm1f	Klk6	Lmo7
Mylip	Prelid3a	Klk7	Lonrf3
Myo10	Prmt2	Klk8	Lpar3
Myo1e	Prss35	Klk9	Lpcat2
Myrip	Psd2	Lacc1	Lpo
Myzap	Ptk2b	Lasp1	Lrch1
Ncf2	Ptpn5	Lbh	Lrp8
Nck2	Ptprf	Lbp	Lrrc27
Ncs1	Ptprm	Lgals3	Lrriq1
Nebl	Pxylp1	Lgi4	Lrrtm1
Nedd4l	Qsox1	Lhfp	Lrtm2
Nid1	Rab30	Lmna	Ltbp1
Nkx2-9	Rab37	Lmo7	Ly6g6e
Nlrc5	Rab40b	Lpcat1	Maf
Nmnat2	Rab6b	Lpcat2	Man1c1
Npb	Rab7b	Lpp	Maob
Nppc	Rai14	Lrch1	Map1b
Nqo1	Ramp2	Lrfn2	Map2k3os
Nsun7	Rapgef4	Lrp8	Map2k6
Nucb2	Rapgef5	Lrrc18	Mapre2
Nudt12	Rasgef1c	Lrrc27	Marcksl1
Nudt7	Rasl11b	Lrrn2	Mboat1
Nynrin	Rbms3	Lrtm2	Mcub
Olfm1	Rbpjl	Lsm11	Mdga1
Orai2	Rell1	Ltbp1	Mef2c
P2ry12	Rftn1	Ltbp3	Megf6
Pacsin1	Rftn2	Ltbr	Mfge8
Padi2	Rgl1	Ly6e	Mfhas1
Pak3	Rgmb	Ly6g6e	Mfsd4b1
Pald1	Rgs16	Ly6h	Mgat5b
Palm	Rgs7	Mafb	Mgst3
Papss2	Rhpn1	Maged2	Micall2
Paqr6	Rhpn2	Maml3	Mid1
Paqr7	Rimkla	Mamld1	Mkrn3
Paqr8	Rims1	Man1c1	Mkx
Pard3b	Rnd2	Map1b	Mlf1
Pde11a	Rnf112	Map2k3os	Mmd2
Pde5a	Rnf152	Map2k6	Mmp11
Pdgfa	Rnf32	Mapk10	Mmp15
Pdgfrl	Ror1	Marcksl1	Mmp17
Pdk1	Rps6ka2	Mcf2l	Mmp2
Pdlim1	Rsph10b	Mcub	Mn1
Pdlim3	S100a6	Mdga1	Mocos
Pdzrn3	S100b	Meiob	Msi1
Per3	S1pr2	Metrnl	Msn
Phkg1	Sass6	Mfge8	Mtcl1
Piezo2	Sccpdh	Mfhas1	Mtmr7
Pir	Scel	Mgst3	Mtss1
Pkia	Scube1	Micall2	Mxd3
Pla2g4a	Scube3	Mid1	Myh7b
Plcd4	Sdk2	Midn	Mylip
Plekha7	Selenop	Mlf1	Myo10
Plekhh2	Sema4a	Mlkl	Myof
Plet1os	Sema4c	Mmgt2	Myzap
Plin3	Sema4g	Mmp17	Ncf2
Plpp2	Sema5a	Mmp2	Nck2
Pmp22	Sept9	Mn1	Ncs1
Podxl2	Serpina3c	Mocos	Ndn
Ppm1f	Serpina3i	Morc4	Nedd4l
Pqlc3	Serpina3n	Moxd1	Nedd9
Prelid3a	Serpind1	Mpeg1	Nell2
Prkag3	Serpine1	Mras	Nes
Prmt2	Serpinh1	Msi1	Nid1
Prr7	Sfxn1	Msn	Nkx2-9
Psd2	Sgms2	Msrb3	Nmnat3
Psg16	Sh3bp4	Mtmr7	Nmu
Ptk2b	Sh3pxd2b	Mvp	Npb
Ptprf	Shank2	Mylip	Nppc
Ptprm	Shcbp1l	Myo10	Nqo1
Pxylp1	Shisa8	Myo1c	Nrp2
Qsox1	Shroom1	Myof	Nsun7
Rab20	Shroom4	Myrip	Nucb2
Rab30	Sik1	Myzap	Nudt12
Rab36	Skida1	Nav2	Nudt7
Rab37	Slc13a3	Nck2	Oat
Rab7b	Slc16a10	Ncs1	Olfm1
Rai14	Slc25a1	Nebl	Olfml2b
Ramp2	Slc25a10	Nedd4l	P2ry12
Rapgef4	Slc25a16	Nes	Pald1
Rapgef4os1	Slc27a1	Nhs	Palm
Rapgef5	Slc34a3	Nid1	Paqr6
Rasgef1c	Slc38a3	Ninj1	Paqr7
Rasl11b	Slc39a11	Nlgn2	Pard3b
Rbm46	Slc41a2	Noct	Pard3bos3
Rbms1	Slc41a3	Nol3	Pcdh1
Rbpjl	Slc45a3	Nos1	Pde11a
Rcn1	Slc4a3	Notch1	Pde5a
Rcor2	Slc4a8	Nptx1	Pdgfa
Rftn1	Slc5a11	Nrcam	Pdgfrb
Rftn2	Slc9a3r1	Nrp2	Pdgfrl
Rgmb	Slc9b2	Nrtn	Pdk1
Rgs16	Slpi	Nsun7	Pdlim1
Rgs7	Smim3	Nucb2	Pdlim3
Rhbdf1	Smim5	Nudt14	Pdlim7
Rhbdl1	Smtnl2	Nup93	Pea15a
Rhpn1	Snhg11	Nupr1	Per2
Rimkla	Snta1	Oas2	Per3
Rims1	Sobp	Oat	Pik3r5
Rnasel	Sowaha	Odc1	Pir
Rnd2	Sox13	Olfm1	Pisd
Rnd3	Sp7	Olfml2b	Piwil4
Rnf112	Sparc	Olfml3	Pkia
Rnf125	Spata13	Orai2	Plcd4
Rnf152	Spint2	Osmr	Plcg2
Rnf32	Sqle	Padi2	Plch2
Ror1	Sqor	Pafah1b3	Plcxd2
Rps6ka2	Srgap3	Pak3	Plekha7
Rtn4r	St3gal4	Pald1	Plet1os
Rtp4	St5	Palm	Plin3
S100a6	St8sia5	Pard3b	Plxna4
S100b	Stard5	Pcdh1	Plxnc1
S1pr2	Stom	Pcdhb16	Pmp22
Sccpdh	Suclg2	Pcdhb17	Podxl2
Scel	Syde2	Pde5a	Pqlc3
Scube3	Syne3	Pdk1	Prelid3a
Sdc4	Sypl	Pdzd4	Prkar1b
Sdk1	Syt9	Pdzrn3	Prmt2
Sdk2	Tdrd6	Pfkfb4	Prr7
Selenop	Tead1	Pfkl	Psd2
Sema4a	Tenm4	Pgghg	Ptk2b
Sema5a	Tex22	Piezo2	Ptms
Sept9	Tgfb2	Pik3r5	Ptprf
Serpina3n	Tgfbr3	Pim1	Ptprm
Serpind1	Thrsp	Pisd	Pxylp1
Serpinh1	Thsd4	Pkia	Qsox1
Sfta2	Tiam1	Pla2g4a	Rab20
Sfxn1	Tiam2	Plcb3	Rab30
Sh3bgrl	Timeless	Plcxd2	Rab37
Sh3pxd2b	Tle6	Plec	Rab6b
Shcbp1l	Tln2	Plekha6	Radil
Shisa8	Tlnrd1	Plekha7	Rai14
Shroom1	Tm7sf2	Plin2	Ramp2
Sik1	Tmc3	Plpp2	Rapgef4
Sirpa	Tmem121	Plscr3	Rapgef5
Six4	Tmem41a	Plvap	Rapsn
Skida1	Tmem53	Plxna1	Rasgef1c
Slc13a3	Tmtc1	Plxna2	Rasl11b
Slc16a10	Tmtc4	Plxna4	Rbm46
Slc25a10	Tnfrsf13c	Plxnb2	Rbms1
Slc25a27	Tnfrsf21	Poc1a	Rbms3
Slc25a42	Tns1	Podxl2	Rbp1
Slc27a1	Tns2	Poglut3	Rbpjl
Slc34a3	Top1mt	Polr3g	Rcn1
Slc38a3	Tox	Ppp1r18	Rftn2
Slc41a2	Tpcn1	Pqlc3	Rfx2
Slc41a3	Trak1	Prdm11	Rgl1
Slc45a3	Tram2	Prelid3a	Rgmb
Slc46a1	Tsc22d1	Prkar1b	Rgs16
Slc4a3	Tspan17	Prorsd1	Rgs7
Slc5a11	Tspan9	Pros1	Rhbdf1
Slc9a3r1	Ttll3	Psd2	Rhbdl1
Slc9b2	Ttyh3	Ptms	Rhpn1
Slit3	Tubb2b	Ptpn5	Rimkla
Slpi	Uchl1	Ptpn9	Rims1
Smim3	Unc119	Ptprm	Rnasel
Smim5	Unc13b	Rab32	Rnd2
Smtnl2	Vamp1	Radil	Rnd3
Snhg11	Vat1	Ralgps2	Rnf112
Sowaha	Vat1l	Ramp2	Rnf152
Sox11	Vav3	Rap1gap	Rnf182
Sox13	Vps37b	Rap2b	Rnf32
Sp7	Wfs1	Rapgef5	Ror1
Spata13	Zc2hc1a	Rapsn	Rps6ka2
Spef2	Zdhhc15	Rasgef1c	Rtn4r
Spint2	Zdhhc23	Rasip1	S100a10
Sqor	Zfhx3	Rbfox1	S100a11
Srgap3	Zfp385b	Rbm46	S100b
St3gal4	Zfp41	Rbms1	S1pr2
St5	Zfp423	Rbms3	Sccpdh
St8sia5	Zfp467	Rbp1	Scel
Stard5	Zfp979	Rbpjl	Scml4
Suclg2	Zyx	Rcc2	Scn1b
Syde2		Rcn1	Scube1
Syne3		Rell1	Scube3
Sypl		Reps2	Sdc1
Sys1		Rfx2	Sdk1
Syt9		Rgl1	Sdk2
Tdrd6		Rgmb	Sema3f
Tead1		Rgs16	Sema4c
Tec		Rgs17	Sema7a
Tenm4		Rgs20	Sept9
Tex22		Rhbdf1	Serpina3i
Tgfb2		Rhobtb1	Serpina3m
Thrsp		Rims1	Serpind1
Thsd4		Ripor1	Sez6
Tiam1		Rnase4	Sfxn1
Tiam2		Rnasel	Sh3bgrl
Tle6		Rnd3	Sh3bp4
Tln2		Rnf152	Sh3pxd2b
Tlnrd1		Rnf182	Shank2
Tlr3		Rnf217	Shisa8
Tmc3		Ror1	Shroom1
Tmem121		Rps6ka2	Shroom4
Tmem268		Rras2	Sik1
Tmem28		Rsad2	Sirpa
Tmem41a		Rtn4r	Six4
Tmprss5		Runx1	Skida1
Tmtc1		Rxrg	Slc10a6
Tmtc4		S100a10	Slc13a3
Tnfrsf13c		S100a4	Slc16a10
Tnfrsf21		S100a6	Slc16a2
Tns1		S1pr2	Slc22a18
Tns2		Samd5	Slc25a10
Top1mt		Samhd1	Slc25a42
Tox		Scd1	Slc27a1
Tox3		Scel	Slc27a6
Tppp3		Scml4	Slc29a1
Trabd2b		Scn1b	Slc34a3
Traf3		Scube1	Slc35d2
Trak1		Scube3	Slc38a3
Trib1		Sdc1	Slc39a11
Trim36		Sdc3	Slc41a2
Tspan17		Sdk1	Slc41a3
Tspan9		Sdk2	Slc45a3
Ttll3		Sema3f	Slc46a1
Ttyh3		Sema4a	Slc4a11
Tubb2b		Sema4b	Slc4a3
Tulp3		Sema4c	Slc5a11
Txnip		Sema5a	Slc5a3
Txnrd3		Sema7a	Slc9a3r1
Uchl1		Sept9	Slc9b1
Vat1		Serpina3c	Slc9b2
Vat1l		Serpina3g	Slpi
Vps37b		Serpina3i	Smim5
Vstm2b		Serpina3m	Smtnl2
Vwa5a		Serpina3n	Snhg11
Wdr95		Serpind1	Snhg18
Wee2		Serpine1	Snx18
Wscd2		Serping1	Soat1
Zdhhc15		Serpinh1	Sobp
Zdhhc23		Sertad1	Sowaha
Zfhx3		Sfxn1	Sox11
Zfp385b		Sfxn3	Sox13
Zfp41		Sgms2	Sp7
Zfp423		Sh2d4b	Spata13
Zfp558		Sh3bp4	Spint2
Zfp976		Sh3pxd2b	Spon1
Zfp977		Sh3rf3	Sqor
Zfp979		Shank2	Srgap3
Zik1		Shf	Srrm4
Zyx		Shfl	Srxn1
		Shisa8	St3gal4
		Shroom4	St3gal5
		Sik1	St5
		Six4	St6galnac5
		Slc10a6	St8sia5
		Slc13a3	Stag3
		Slc16a10	Stard5
		Slc16a2	Suclg2
		Slc1a4	Syde2
		Slc22a21	Synm
		Slc25a24	Synpo2
		Slc25a30	Syt6
		Slc25a37	Syt9
		Slc27a6	Tcim
		Slc29a1	Tdrd6
		Slc2a10	Tead1
		Slc30a4	Tec
		Slc35d2	Tenm4
		Slc38a3	Tgfb2
		Slc39a11	Tgfbr3
		Slc39a14	Tgif2
		Slc41a2	Tiam1
		Slc41a3	Tiam2
		Slc4a11	Tle6
		Slc4a7	Tln2
		Slc4a8	Tlnrd1
		Slc5a11	Tlr3
		Slc5a3	Tm6sf1
		Slc7a1	Tmc3
		Slc7a4	Tmem117
		Slco5a1	Tmem121
		Smim3	Tmem132c
		Smim5	Tmem28
		Snhg18	Tmem38b
		Sntb2	Tmem41a
		Snx10	Tmsb10
		Soat1	Tmtc4
		Sobp	Tnfrsf13c
		Socs2	Tns1
		Socs3	Top1mt
		Sorcs2	Tox
		Sox11	Tox2
		Sox13	Tox3
		Sox4	Trabd2b
		Sox5	Trak1
		Spata13	Trib1
		Spats2l	Trim47
		Sphk1	Tspan17
		Spon1	Tspan9
		Spred3	Ttll3
		Spry1	Ttyh3
		Spry4	Tuba4a
		Spsb2	Tubb2a
		Srxn1	Tubb2b
		St3gal5	Tulp3
		St6galnac5	Txnrd3
		St8sia5	Uchl1
		Stard5	Uchl1os
		Stat5a	Ucp2
		Steap3	Unc5d
		Stk32a	Usp35
		Stxbp1	Vat1
		Suclg2	Vat1l
		Sulf1	Vegfd
		Sv2c	Vps37b
		Syde2	Vwa3b
		Syt6	Wscd2
		Syt9	Zbtb42
		Tagln2	Zc2hc1a
		Tbc1d1	Zfhx3
		Tbc1d10a	Zfp385b
		Tcim	Zfp423
		Tead1	Zfp976
		Tenm3	Zfp977
		Tenm4	Zfp979
		Tfap2a	Zyx
		Tgfb2
		Tgfbr3
		Tgif2
		Thrsp
		Tiam2
		Timeless
		Tiparp
		Tle6
		Tlr3
		Tm6sf1
		Tmem106a
		Tmem131l
		Tmem159
		Tmem176a
		Tmem176b
		Tmem200a
		Tmem41a
		Tmprss5
		Tmsb10
		Tmtc4
		Tnfrsf12a
		Tnfrsf13c
		Tnfrsf1a
		Tnfrsf21
		Tnfsf11
		Tnfsf9
		Tns1
		Tnxb
		Top1mt
		Tox2
		Tox3
		Tpm4
		Traf3
		Traf4
		Trak1
		Tram2
		Trerf1
		Trib1
		Trib3
		Trim46
		Trim47
		Tsc22d1
		Tspan17
		Tspan4
		Ttyh3
		Tubb2a
		Tubb2b
		Tubb6
		Tulp3
		Txndc5
		Txnrd1
		Txnrd3
		Ubd
		Uchl1
		Ucn2
		Unc13b
		Upp1
		Usp35
		Utrn
		Vamp5
		Vash1
		Vat1
		Vat1l
		Vav3
		Vgf
		Vim
		Vps37b
		Vsir
		Vwa1
		Wfs1
		Wnk4
		Xylt1
		Ywhag
		Zbtb42
		Zc2hc1a
		Zcchc18
		Zfhx3
		Zfp281
		Zfp36
		Zfp385b
		Zfp423
		Zfp467
		Zyx
