# Supplementary material for: Distinct transcriptomic and epigenomic responses of mature oligodendrocytes during disease progression in a mouse model of multiple sclerosis
Source: Nat Neurosci. 2025 Nov 17;28(12):2612–27. doi: 10.1038/s41593-025-02100-3 (PMC12672374; doi:10.1038/s41593-025-02100-3)
Supplement: Supplementary file 8 — GO of differential modalities between MOL5/MOL6 and MOL2. [file 41593_2025_2100_MOESM8_ESM.xlsx]

## Sheet: Summary
Supplementary Table 6. Genes ontology of differential modality between MOL56 and MOL2
Naming of the sheets	GO_(Features Selection Acronym)_(subOLG population1)_(subOLG population2)_(Timepoint)
GO	Gene Ontology using Ensembl via biomaRt on top50 most variable genes between timepoints before annotation (pvalueCutoff=1, qvalueCutoff=1, pAdjustMethod="fdr"). For genes differentially expressed in all timepoints, all genes were selected
Features Selection Acronym	Full Name	Description
DGE	Differential Genes Expression	Selection of differentially expressed genes using DESeq2 between subOLG population (MOL56/MOL2, MOL2/MOL56) with absolute log2FC > 1, pvalue adjusted < 0.01 and baseMean > 1
subOLG population		Description
MOL56 or MOL2		The enrichment pathways in each sheet are upregulated in subOLG population1 compared to subOLG population2
Timepoint	Description
If a timepoint is specify, from all genes differentially expressed in subOLG population1 over subOLG population2, the top50 most variable genes ordered by log2FC is passed on for enrichment pathway analysis
If no timepoint is specified, the enrichment pathway analysis has been made on all genes present as differentially expressed in all timepoints
If a timepoint sheet is missing, no genes were found in the feature selection method for this timepoint or no genes were found in Ensembl annotation to perform pathway enrichment or no enriched pathways were found at this timepoint
Metrics explanation
ID	Pathway Identifier
Description	Description of the pathway
GeneRatio (M/N)	M/N where M is the number of genes of interest in the gene set and N is the total number of genes of interest
BgRatio (k/n)	k/n where k is the number of genes in the gene set and n is the total number of genes in all gene sets
pvalue	p-value
p.adjust	p-value ajusted by Bonferroni-Hochberg correction
qvalue	q-value (estimate of the FDR associated with the p-value ajusted by Bonferroni-Hochberg correction)
geneID	Gene name
Count	Number of gene annotated in a gene set
Significant	* (p.adjust < 0.05)

## Sheet: GO_DGE_MOL2_MOL56
ID	Description	GeneRatio	BgRatio	pvalue	p.adjust	qvalue	geneID	Count	Significant
R-MMU-9012999	RHO GTPase cycle	12/91	395/8582	0.000892935	0.305384	0.304538	Basp1/Cyfip2/Dlc1/Dlg5/Fam83b/Fgd4/Fmnl3/Nck2/Pde5a/Spata13/Syde2/Tiam2	12
R-MMU-422475	Axon guidance	8/91	249/8582	0.00478718	0.529062	0.527597	Dpysl5/Epha10/Evl/Fgfr1/Mmp2/Msn/Nck2/Tubb2b	8
R-MMU-9675108	Nervous system development	8/91	250/8582	0.0049032	0.529062	0.527597	Dpysl5/Epha10/Evl/Fgfr1/Mmp2/Msn/Nck2/Tubb2b	8
R-MMU-5682910	LGI-ADAM interactions	2/91	13/8582	0.00803956	0.529062	0.527597	Adam11/Lgi4	2
R-MMU-1474244	Extracellular matrix organization	7/91	230/8582	0.0109042	0.529062	0.527597	Col1a2/Colgalt2/Fbln2/Mmp2/Nid1/Scube3/Tgfb2	7
R-MMU-881907	Gastrin-CREB signalling pathway via PKC and MAPK	2/91	17/8582	0.0136377	0.529062	0.527597	Hbegf/Rps6ka2	2
R-MMU-1266738	Developmental Biology	10/91	447/8582	0.0195335	0.529062	0.527597	Adam11/Dpysl5/Epha10/Evl/Fgfr1/Lgi4/Mmp2/Msn/Nck2/Tubb2b	10
R-MMU-1474228	Degradation of the extracellular matrix	4/91	106/8582	0.0259004	0.529062	0.527597	Col1a2/Mmp2/Nid1/Scube3	4
R-MMU-2682334	EPH-Ephrin signaling	3/91	63/8582	0.0289991	0.529062	0.527597	Epha10/Mmp2/Nck2	3
R-MMU-373760	L1CAM interactions	3/91	63/8582	0.0289991	0.529062	0.527597	Fgfr1/Msn/Tubb2b	3
R-MMU-9013149	RAC1 GTPase cycle	5/91	163/8582	0.029244	0.529062	0.527597	Cyfip2/Dlc1/Spata13/Syde2/Tiam2	5
R-MMU-2022854	Keratan sulfate biosynthesis	2/91	27/8582	0.0328733	0.529062	0.527597	B4galt6/Chst2	2
R-MMU-948021	Transport to the Golgi and subsequent modification	5/91	171/8582	0.0349203	0.529062	0.527597	B4galt6/Cd55/Cd59b/Man1c1/Tubb2b	5
R-MMU-425366	Transport of bile salts and organic acids metal ions and amine compounds	3/91	70/8582	0.0379298	0.529062	0.527597	Slc13a3/Slc41a2/Slc5a11	3
R-MMU-352230	Amino acid transport across the plasma membrane	2/91	30/8582	0.0399184	0.529062	0.527597	Slc16a10/Slc38a3	2
R-MMU-2129379	Molecules associated with elastic fibres	2/91	32/8582	0.0449032	0.529062	0.527597	Fbln2/Tgfb2	2
R-MMU-3928665	EPH-ephrin mediated repulsion of cells	2/91	33/8582	0.0474776	0.529062	0.527597	Epha10/Mmp2	2
R-MMU-9013424	RHOV GTPase cycle	2/91	33/8582	0.0474776	0.529062	0.527597	Dlg5/Nck2	2
R-MMU-1638074	Keratan sulfate/keratin metabolism	2/91	35/8582	0.0527835	0.529062	0.527597	B4galt6/Chst2	2
R-MMU-437239	Recycling pathway of L1	2/91	35/8582	0.0527835	0.529062	0.527597	Msn/Tubb2b	2
R-MMU-446203	Asparagine N-linked glycosylation	6/91	256/8582	0.0541174	0.529062	0.527597	B4galt6/Cd55/Cd59b/Man1c1/St8sia5/Tubb2b	6
R-MMU-2173789	TGF-beta receptor signaling activates SMADs	2/91	36/8582	0.0555122	0.529062	0.527597	Bambi/Tgfb2	2
R-MMU-9013420	RHOU GTPase cycle	2/91	36/8582	0.0555122	0.529062	0.527597	Dlg5/Nck2	2
R-MMU-977606	Regulation of Complement cascade	2/91	36/8582	0.0555122	0.529062	0.527597	Cd55/Cd59b	2
R-MMU-9013148	CDC42 GTPase cycle	3/91	84/8582	0.0594771	0.529062	0.527597	Dlc1/Fgd4/Spata13	3
R-MMU-1566948	Elastic fibre formation	2/91	39/8582	0.0639855	0.529062	0.527597	Fbln2/Tgfb2	2
R-MMU-9696264	RND3 GTPase cycle	2/91	40/8582	0.0669014	0.529062	0.527597	Dlg5/Fam83b	2
R-MMU-9696273	RND1 GTPase cycle	2/91	41/8582	0.0698609	0.529062	0.527597	Dlg5/Fam83b	2
R-MMU-1500931	Cell-Cell communication	3/91	91/8582	0.0719956	0.529062	0.527597	Cdh8/Nck2/Sdk2	3
R-MMU-6807878	COPI-mediated anterograde transport	3/91	91/8582	0.0719956	0.529062	0.527597	Cd55/Cd59b/Tubb2b	3
R-MMU-9696270	RND2 GTPase cycle	2/91	42/8582	0.0728627	0.529062	0.527597	Dlg5/Fam83b	2
R-MMU-194068	Bile acid and bile salt metabolism	2/91	44/8582	0.0789887	0.529062	0.527597	Cyp39a1/Stard5	2
R-MMU-425407	SLC-mediated transmembrane transport	5/91	218/8582	0.0814736	0.529062	0.527597	Slc13a3/Slc16a10/Slc38a3/Slc41a2/Slc5a11	5
R-MMU-166658	Complement cascade	2/91	46/8582	0.08527	0.529062	0.527597	Cd55/Cd59b	2
R-MMU-71406	Pyruvate metabolism and Citric Acid (TCA) cycle	2/91	47/8582	0.088466	0.529062	0.527597	Pdk1/Suclg2	2
R-MMU-193648	NRAGE signals death through JNK	2/91	48/8582	0.0916975	0.529062	0.527597	Fgd4/Tiam2	2
R-MMU-421270	Cell-cell junction organization	2/91	48/8582	0.0916975	0.529062	0.527597	Cdh8/Sdk2	2
R-MMU-112308	Presynaptic depolarization and calcium channel opening	1/91	10/8582	0.101167	0.529062	0.527597	Cacna1b	1
R-MMU-1660517	Synthesis of PIPs at the late endosome membrane	1/91	10/8582	0.101167	0.529062	0.527597	Mtmr7	1
R-MMU-3000157	Laminin interactions	1/91	10/8582	0.101167	0.529062	0.527597	Nid1	1
R-MMU-418457	cGMP effects	1/91	10/8582	0.101167	0.529062	0.527597	Pde5a	1
R-MMU-75892	Platelet Adhesion to exposed collagen	1/91	10/8582	0.101167	0.529062	0.527597	Col1a2	1
R-MMU-9840309	Glycosphingolipid biosynthesis	1/91	10/8582	0.101167	0.529062	0.527597	Esyt3	1
R-MMU-1250347	SHC1 events in ERBB4 signaling	1/91	11/8582	0.110709	0.529062	0.527597	Hbegf	1
R-MMU-1963640	GRB2 events in ERBB2 signaling	1/91	11/8582	0.110709	0.529062	0.527597	Hbegf	1
R-MMU-430116	GP1b-IX-V activation signalling	1/91	11/8582	0.110709	0.529062	0.527597	Col1a2	1
R-MMU-5140745	WNT5A-dependent internalization of FZD2 FZD5 and ROR2	1/91	11/8582	0.110709	0.529062	0.527597	Ror1	1
R-MMU-8847993	ERBB2 Activates PTK6 Signaling	1/91	11/8582	0.110709	0.529062	0.527597	Hbegf	1
R-MMU-913709	O-linked glycosylation of mucins	2/91	54/8582	0.11177	0.529062	0.527597	B4galt6/Galnt3	2
R-MMU-1442490	Collagen degradation	2/91	55/8582	0.11522	0.529062	0.527597	Col1a2/Mmp2	2
R-MMU-2029482	Regulation of actin dynamics for phagocytic cup formation	2/91	55/8582	0.11522	0.529062	0.527597	Cyfip2/Myo10	2
R-MMU-448424	Interleukin-17 signaling	2/91	55/8582	0.11522	0.529062	0.527597	Map2k6/Rps6ka2	2
R-MMU-450294	MAP kinase activation	2/91	55/8582	0.11522	0.529062	0.527597	Map2k6/Rps6ka2	2
R-MMU-373080	Class B/2 (Secretin family receptors)	2/91	56/8582	0.118697	0.529062	0.527597	Cd55/Ramp2	2
R-MMU-1475029	Reversible hydration of carbon dioxide	1/91	12/8582	0.120151	0.529062	0.527597	Car5b	1
R-MMU-179812	GRB2 events in EGFR signaling	1/91	12/8582	0.120151	0.529062	0.527597	Hbegf	1
R-MMU-190239	FGFR3 ligand binding and activation	1/91	12/8582	0.120151	0.529062	0.527597	Galnt3	1
R-MMU-190372	FGFR3c ligand binding and activation	1/91	12/8582	0.120151	0.529062	0.527597	Galnt3	1
R-MMU-114608	Platelet degranulation	3/91	117/8582	0.127349	0.529062	0.527597	Abcc4/Anxa5/Tgfb2	3
R-MMU-180336	SHC1 events in EGFR signaling	1/91	13/8582	0.129494	0.529062	0.527597	Hbegf	1
R-MMU-190373	FGFR1c ligand binding and activation	1/91	13/8582	0.129494	0.529062	0.527597	Fgfr1	1
R-MMU-392154	Nitric oxide stimulates guanylate cyclase	1/91	13/8582	0.129494	0.529062	0.527597	Pde5a	1
R-MMU-4419969	Depolymerization of the Nuclear Lamina	1/91	13/8582	0.129494	0.529062	0.527597	Lmna	1
R-MMU-6785631	ERBB2 Regulates Cell Motility	1/91	13/8582	0.129494	0.529062	0.527597	Hbegf	1
R-MMU-9006934	Signaling by Receptor Tyrosine Kinases	7/91	400/8582	0.131261	0.529062	0.527597	Col1a2/Cyfip2/Fgfr1/Galnt3/Hbegf/Nck2/Rps6ka2	7
R-MMU-1650814	Collagen biosynthesis and modifying enzymes	2/91	60/8582	0.132859	0.529062	0.527597	Col1a2/Colgalt2	2
R-MMU-1963642	PI3K events in ERBB2 signaling	1/91	14/8582	0.138738	0.529062	0.527597	Hbegf	1
R-MMU-419408	Lysosphingolipid and LPA receptors	1/91	14/8582	0.138738	0.529062	0.527597	S1pr2	1
R-MMU-5633008	TP53 Regulates Transcription of Cell Death Genes	1/91	14/8582	0.138738	0.529062	0.527597	Prelid3a	1
R-MMU-76005	Response to elevated platelet cytosolic Ca2+	3/91	122/8582	0.139368	0.529062	0.527597	Abcc4/Anxa5/Tgfb2	3
R-MMU-2995410	Nuclear Envelope (NE) Reassembly	2/91	64/8582	0.147384	0.529062	0.527597	Lmna/Tubb2b	2
R-MMU-9833482	PKR-mediated signaling	2/91	64/8582	0.147384	0.529062	0.527597	Map2k6/Tubb2b	2
R-MMU-1250196	SHC1 events in ERBB2 signaling	1/91	15/8582	0.147886	0.529062	0.527597	Hbegf	1
R-MMU-156584	Cytosolic sulfonation of small molecules	1/91	15/8582	0.147886	0.529062	0.527597	Podxl2	1
R-MMU-193775	Synthesis of bile acids and bile salts via 24-hydroxycholesterol	1/91	15/8582	0.147886	0.529062	0.527597	Cyp39a1	1
R-MMU-2173788	Downregulation of TGF-beta receptor signaling	1/91	15/8582	0.147886	0.529062	0.527597	Bambi	1
R-MMU-2243919	Crosslinking of collagen fibrils	1/91	15/8582	0.147886	0.529062	0.527597	Col1a2	1
R-MMU-264642	Acetylcholine Neurotransmitter Release Cycle	1/91	15/8582	0.147886	0.529062	0.527597	Rims1	1
R-MMU-399956	CRMPs in Sema3A signaling	1/91	15/8582	0.147886	0.529062	0.527597	Dpysl5	1
R-MMU-5654219	Phospholipase C-mediated cascade: FGFR1	1/91	15/8582	0.147886	0.529062	0.527597	Fgfr1	1
R-MMU-8866427	VLDLR internalisation and degradation	1/91	15/8582	0.147886	0.529062	0.527597	Mylip	1
R-MMU-975577	N-Glycan antennae elongation	1/91	15/8582	0.147886	0.529062	0.527597	B4galt6	1
R-MMU-204998	Cell death signalling via NRAGE NRIF and NADE	2/91	66/8582	0.154765	0.529062	0.527597	Fgd4/Tiam2	2
R-MMU-190242	FGFR1 ligand binding and activation	1/91	16/8582	0.156937	0.529062	0.527597	Fgfr1	1
R-MMU-190840	Microtubule-dependent trafficking of connexons from Golgi to the plasma membrane	1/91	16/8582	0.156937	0.529062	0.527597	Tubb2b	1
R-MMU-196757	Metabolism of folate and pterines	1/91	16/8582	0.156937	0.529062	0.527597	Aldh1l2	1
R-MMU-204174	Regulation of pyruvate dehydrogenase (PDH) complex	1/91	16/8582	0.156937	0.529062	0.527597	Pdk1	1
R-MMU-438064	Post NMDA receptor activation events	1/91	16/8582	0.156937	0.529062	0.527597	Rps6ka2	1
R-MMU-9013106	RHOC GTPase cycle	2/91	67/8582	0.158482	0.529062	0.527597	Dlc1/Fmnl3	2
R-MMU-5663220	RHO GTPases Activate Formins	3/91	131/8582	0.161917	0.529062	0.527597	Evl/Fmnl3/Tubb2b	3
R-MMU-211859	Biological oxidations	4/91	201/8582	0.164406	0.529062	0.527597	Cyp39a1/Ephx1/Mgst3/Podxl2	4
R-MMU-159418	Recycling of bile acids and salts	1/91	17/8582	0.165893	0.529062	0.527597	Stard5	1
R-MMU-180292	GAB1 signalosome	1/91	17/8582	0.165893	0.529062	0.527597	Hbegf	1
R-MMU-190872	Transport of connexons to the plasma membrane	1/91	17/8582	0.165893	0.529062	0.527597	Tubb2b	1
R-MMU-2995383	Initiation of Nuclear Envelope (NE) Reformation	1/91	17/8582	0.165893	0.529062	0.527597	Lmna	1
R-MMU-3928663	EPHA-mediated growth cone collapse	1/91	17/8582	0.165893	0.529062	0.527597	Epha10	1
R-MMU-3928664	Ephrin signaling	1/91	17/8582	0.165893	0.529062	0.527597	Nck2	1
R-MMU-5576886	Phase 4 - resting membrane potential	1/91	17/8582	0.165893	0.529062	0.527597	Kcnk5	1
R-MMU-5676594	TNF receptor superfamily (TNFSF) members mediating non-canonical NF-kB pathway	1/91	17/8582	0.165893	0.529062	0.527597	Tnfrsf13c	1
R-MMU-9009391	Extra-nuclear estrogen signaling	2/91	69/8582	0.165967	0.529062	0.527597	Hbegf/Mmp2	2
R-MMU-170834	Signaling by TGF-beta Receptor Complex	2/91	70/8582	0.169733	0.529062	0.527597	Bambi/Tgfb2	2
R-MMU-416482	G alpha (12/13) signalling events	2/91	71/8582	0.173513	0.529062	0.527597	Fgd4/Tiam2	2
R-MMU-181429	Serotonin Neurotransmitter Release Cycle	1/91	18/8582	0.174755	0.529062	0.527597	Rims1	1
R-MMU-181430	Norepinephrine Neurotransmitter Release Cycle	1/91	18/8582	0.174755	0.529062	0.527597	Rims1	1
R-MMU-198753	ERK/MAPK targets	1/91	18/8582	0.174755	0.529062	0.527597	Rps6ka2	1
R-MMU-888590	GABA synthesis release reuptake and degradation	1/91	18/8582	0.174755	0.529062	0.527597	Rims1	1
R-MMU-446728	Cell junction organization	2/91	72/8582	0.177308	0.529062	0.527597	Cdh8/Sdk2	2
R-MMU-1474290	Collagen formation	2/91	73/8582	0.181115	0.529062	0.527597	Col1a2/Colgalt2	2
R-MMU-1483255	PI Metabolism	2/91	73/8582	0.181115	0.529062	0.527597	Enpp6/Mtmr7	2
R-MMU-376176	Signaling by ROBO receptors	1/91	19/8582	0.183524	0.529062	0.527597	Evl	1
R-MMU-445144	Signal transduction by L1	1/91	19/8582	0.183524	0.529062	0.527597	Fgfr1	1
R-MMU-5654688	SHC-mediated cascade:FGFR1	1/91	19/8582	0.183524	0.529062	0.527597	Fgfr1	1
R-MMU-190236	Signaling by FGFR	2/91	75/8582	0.188767	0.529062	0.527597	Fgfr1/Galnt3	2
R-MMU-2029480	Fcgamma receptor (FCGR) dependent phagocytosis	2/91	75/8582	0.188767	0.529062	0.527597	Cyfip2/Myo10	2
R-MMU-425410	Metal ion SLC transporters	1/91	20/8582	0.192201	0.529062	0.527597	Slc41a2	1
R-MMU-5423646	Aflatoxin activation and detoxification	1/91	20/8582	0.192201	0.529062	0.527597	Mgst3	1
R-MMU-5654689	PI-3K cascade:FGFR1	1/91	20/8582	0.192201	0.529062	0.527597	Fgfr1	1
R-MMU-8874081	MET activates PTK2 signaling	1/91	20/8582	0.192201	0.529062	0.527597	Col1a2	1
R-MMU-168164	Toll Like Receptor 3 (TLR3) Cascade	2/91	76/8582	0.19261	0.529062	0.527597	Map2k6/Rps6ka2	2
R-MMU-199977	ER to Golgi Anterograde Transport	3/91	143/8582	0.193541	0.529062	0.527597	Cd55/Cd59b/Tubb2b	3
R-MMU-168142	Toll Like Receptor 10 (TLR10) Cascade	2/91	78/8582	0.200327	0.529062	0.527597	Map2k6/Rps6ka2	2
R-MMU-168176	Toll Like Receptor 5 (TLR5) Cascade	2/91	78/8582	0.200327	0.529062	0.527597	Map2k6/Rps6ka2	2
R-MMU-975871	MyD88 cascade initiated on plasma membrane	2/91	78/8582	0.200327	0.529062	0.527597	Map2k6/Rps6ka2	2
R-MMU-140837	Intrinsic Pathway of Fibrin Clot Formation	1/91	21/8582	0.200786	0.529062	0.527597	Serpind1	1
R-MMU-140875	Common Pathway of Fibrin Clot Formation	1/91	21/8582	0.200786	0.529062	0.527597	Serpind1	1
R-MMU-5654693	FRS-mediated FGFR1 signaling	1/91	21/8582	0.200786	0.529062	0.527597	Fgfr1	1
R-MMU-71403	Citric acid cycle (TCA cycle)	1/91	21/8582	0.200786	0.529062	0.527597	Suclg2	1
R-MMU-9013422	RHOBTB1 GTPase cycle	1/91	21/8582	0.200786	0.529062	0.527597	Pde5a	1
R-MMU-166058	MyD88:MAL(TIRAP) cascade initiated on plasma membrane	2/91	79/8582	0.204199	0.529062	0.527597	Map2k6/Rps6ka2	2
R-MMU-168179	Toll Like Receptor TLR1:TLR2 Cascade	2/91	79/8582	0.204199	0.529062	0.527597	Map2k6/Rps6ka2	2
R-MMU-168188	Toll Like Receptor TLR6:TLR2 Cascade	2/91	79/8582	0.204199	0.529062	0.527597	Map2k6/Rps6ka2	2
R-MMU-181438	Toll Like Receptor 2 (TLR2) Cascade	2/91	79/8582	0.204199	0.529062	0.527597	Map2k6/Rps6ka2	2
R-MMU-450302	activated TAK1 mediates p38 MAPK activation	1/91	22/8582	0.209282	0.531453	0.529981	Map2k6	1
R-MMU-163125	Post-translational modification: synthesis of GPI-anchored proteins	2/91	81/8582	0.21197	0.531453	0.529981	Art3/Cntn3	2
R-MMU-193704	p75 NTR receptor-mediated signalling	2/91	81/8582	0.21197	0.531453	0.529981	Fgd4/Tiam2	2
R-MMU-212676	Dopamine Neurotransmitter Release Cycle	1/91	23/8582	0.217688	0.531453	0.529981	Rims1	1
R-MMU-975576	N-glycan antennae elongation in the medial/trans-Golgi	1/91	23/8582	0.217688	0.531453	0.529981	B4galt6	1
R-MMU-975138	TRAF6 mediated induction of NFkB and MAP kinases upon TLR7/8 or 9 activation	2/91	83/8582	0.21977	0.531453	0.529981	Map2k6/Rps6ka2	2
R-MMU-975155	MyD88 dependent cascade initiated on endosome	2/91	84/8582	0.223679	0.531453	0.529981	Map2k6/Rps6ka2	2
R-MMU-210500	Glutamate Neurotransmitter Release Cycle	1/91	24/8582	0.226005	0.531453	0.529981	Rims1	1
R-MMU-70268	Pyruvate metabolism	1/91	24/8582	0.226005	0.531453	0.529981	Pdk1	1
R-MMU-168181	Toll Like Receptor 7/8 (TLR7/8) Cascade	2/91	85/8582	0.227595	0.531453	0.529981	Map2k6/Rps6ka2	2
R-MMU-1614635	Sulfur amino acid metabolism	1/91	25/8582	0.234235	0.531453	0.529981	Cbs	1
R-MMU-198725	Nuclear Events (kinase and transcription factor activation)	1/91	26/8582	0.242379	0.531453	0.529981	Rps6ka2	1
R-MMU-9668328	Sealing of the nuclear envelope (NE) by ESCRT-III	1/91	26/8582	0.242379	0.531453	0.529981	Tubb2b	1
R-MMU-9748787	Azathioprine ADME	1/91	26/8582	0.242379	0.531453	0.529981	Abcc4	1
R-MMU-168138	Toll Like Receptor 9 (TLR9) Cascade	2/91	89/8582	0.243301	0.531453	0.529981	Map2k6/Rps6ka2	2
R-MMU-195258	RHO GTPase Effectors	4/91	238/8582	0.24544	0.531453	0.529981	Cyfip2/Evl/Fmnl3/Tubb2b	4
R-MMU-1482788	Acyl chain remodelling of PC	1/91	27/8582	0.250437	0.531453	0.529981	Lpcat2	1
R-MMU-186763	Downstream signal transduction	1/91	27/8582	0.250437	0.531453	0.529981	Nck2	1
R-MMU-211976	Endogenous sterols	1/91	27/8582	0.250437	0.531453	0.529981	Cyp39a1	1
R-MMU-450282	MAPK targets/ Nuclear events mediated by MAP kinases	1/91	27/8582	0.250437	0.531453	0.529981	Rps6ka2	1
R-MMU-499943	Interconversion of nucleotide di- and triphosphates	1/91	27/8582	0.250437	0.531453	0.529981	Ak5	1
R-MMU-8863795	Downregulation of ERBB2 signaling	1/91	27/8582	0.250437	0.531453	0.529981	Hbegf	1
R-MMU-8955332	Carboxyterminal post-translational modifications of tubulin	1/91	27/8582	0.250437	0.531453	0.529981	Tubb2b	1
R-MMU-1169410	Antiviral mechanism by IFN-stimulated genes	2/91	91/8582	0.251175	0.531453	0.529981	Map2k6/Tubb2b	2
R-MMU-2559583	Cellular Senescence	2/91	91/8582	0.251175	0.531453	0.529981	Map2k6/Rps6ka2	2
R-MMU-4420097	VEGFA-VEGFR2 Pathway	2/91	92/8582	0.255115	0.531453	0.529981	Cyfip2/Nck2	2
R-MMU-76002	Platelet activation signaling and aggregation	4/91	246/8582	0.264081	0.531453	0.529981	Abcc4/Anxa5/Col1a2/Tgfb2	4
R-MMU-109582	Hemostasis	7/91	492/8582	0.265872	0.531453	0.529981	Abcc4/Anxa5/Col1a2/Pde5a/Serpind1/Tgfb2/Tubb2b	7
R-MMU-5654687	Downstream signaling of activated FGFR1	1/91	29/8582	0.266299	0.531453	0.529981	Fgfr1	1
R-MMU-6804758	Regulation of TP53 Activity through Acetylation	1/91	29/8582	0.266299	0.531453	0.529981	Map2k6	1
R-MMU-9753281	Paracetamol ADME	1/91	29/8582	0.266299	0.531453	0.529981	Abcc4	1
R-MMU-156580	Phase II - Conjugation of compounds	2/91	95/8582	0.266942	0.531453	0.529981	Mgst3/Podxl2	2
R-MMU-166166	MyD88-independent TLR4 cascade	2/91	95/8582	0.266942	0.531453	0.529981	Map2k6/Rps6ka2	2
R-MMU-937061	TRIF(TICAM1)-mediated TLR4 signaling	2/91	95/8582	0.266942	0.531453	0.529981	Map2k6/Rps6ka2	2
R-MMU-168638	NOD1/2 Signaling Pathway	1/91	30/8582	0.274106	0.531453	0.529981	Map2k6	1
R-MMU-3769402	Deactivation of the beta-catenin transactivating complex	1/91	30/8582	0.274106	0.531453	0.529981	Sox13	1
R-MMU-5626467	RHO GTPases activate IQGAPs	1/91	30/8582	0.274106	0.531453	0.529981	Tubb2b	1
R-MMU-8875878	MET promotes cell motility	1/91	30/8582	0.274106	0.531453	0.529981	Col1a2	1
R-MMU-917729	Endosomal Sorting Complex Required For Transport (ESCRT)	1/91	30/8582	0.274106	0.531453	0.529981	Vps37b	1
R-MMU-5173105	O-linked glycosylation	2/91	97/8582	0.274829	0.531453	0.529981	B4galt6/Galnt3	2
R-MMU-8856825	Cargo recognition for clathrin-mediated endocytosis	2/91	97/8582	0.274829	0.531453	0.529981	Hbegf/Syt9	2
R-MMU-9006936	Signaling by TGFB family members	2/91	98/8582	0.278771	0.531453	0.529981	Bambi/Tgfb2	2
R-MMU-182971	EGFR downregulation	1/91	31/8582	0.28183	0.531453	0.529981	Hbegf	1
R-MMU-445355	Smooth Muscle Contraction	1/91	31/8582	0.28183	0.531453	0.529981	Pde5a	1
R-MMU-5654726	Negative regulation of FGFR1 signaling	1/91	31/8582	0.28183	0.531453	0.529981	Fgfr1	1
R-MMU-425393	Transport of inorganic cations/anions and amino acids/oligopeptides	2/91	99/8582	0.282712	0.531453	0.529981	Slc16a10/Slc38a3	2
R-MMU-6811558	PI5P PP2A and IER3 Regulate PI3K/AKT Signaling	2/91	99/8582	0.282712	0.531453	0.529981	Fgfr1/Hbegf	2
R-MMU-194138	Signaling by VEGF	2/91	100/8582	0.286652	0.531453	0.529981	Cyfip2/Nck2	2
R-MMU-190861	Gap junction assembly	1/91	32/8582	0.289472	0.531453	0.529981	Tubb2b	1
R-MMU-3000171	Non-integrin membrane-ECM interactions	1/91	32/8582	0.289472	0.531453	0.529981	Col1a2	1
R-MMU-418597	G alpha (z) signalling events	1/91	32/8582	0.289472	0.531453	0.529981	Rgs16	1
R-MMU-5663213	RHO GTPases Activate WASPs and WAVEs	1/91	32/8582	0.289472	0.531453	0.529981	Cyfip2	1
R-MMU-5694530	Cargo concentration in the ER	1/91	32/8582	0.289472	0.531453	0.529981	Cd59b	1
R-MMU-9706574	RHOBTB GTPase Cycle	1/91	32/8582	0.289472	0.531453	0.529981	Pde5a	1
R-MMU-211945	Phase I - Functionalization of compounds	2/91	101/8582	0.29059	0.531453	0.529981	Cyp39a1/Ephx1	2
R-MMU-1236394	Signaling by ERBB4	1/91	33/8582	0.297035	0.531863	0.53039	Hbegf	1
R-MMU-1592389	Activation of Matrix Metalloproteinases	1/91	33/8582	0.297035	0.531863	0.53039	Mmp2	1
R-MMU-4085001	Sialic acid metabolism	1/91	33/8582	0.297035	0.531863	0.53039	St8sia5	1
R-MMU-8964043	Plasma lipoprotein clearance	1/91	33/8582	0.297035	0.531863	0.53039	Mylip	1
R-MMU-114604	GPVI-mediated activation cascade	1/91	34/8582	0.304518	0.53683	0.535343	Col1a2	1
R-MMU-192105	Synthesis of bile acids and bile salts	1/91	34/8582	0.304518	0.53683	0.535343	Cyp39a1	1
R-MMU-70263	Gluconeogenesis	1/91	34/8582	0.304518	0.53683	0.535343	Aldoc	1
R-MMU-199418	Negative regulation of the PI3K/AKT network	2/91	106/8582	0.310236	0.543197	0.541692	Fgfr1/Hbegf	2
R-MMU-8948216	Collagen chain trimerization	1/91	35/8582	0.311921	0.543197	0.541692	Col1a2	1
R-MMU-1483257	Phospholipid metabolism	3/91	187/8582	0.318566	0.543197	0.541692	Enpp6/Lpcat2/Mtmr7	3
R-MMU-111465	Apoptotic cleavage of cellular proteins	1/91	36/8582	0.319247	0.543197	0.541692	Lmna	1
R-MMU-140877	Formation of Fibrin Clot (Clotting Cascade)	1/91	36/8582	0.319247	0.543197	0.541692	Serpind1	1
R-MMU-442755	Activation of NMDA receptors and postsynaptic events	1/91	36/8582	0.319247	0.543197	0.541692	Rps6ka2	1
R-MMU-76009	Platelet Aggregation (Plug Formation)	1/91	36/8582	0.319247	0.543197	0.541692	Col1a2	1
R-MMU-156590	Glutathione conjugation	1/91	37/8582	0.326496	0.544691	0.543183	Mgst3	1
R-MMU-2559580	Oxidative Stress Induced Senescence	1/91	37/8582	0.326496	0.544691	0.543183	Map2k6	1
R-MMU-9035034	RHOF GTPase cycle	1/91	37/8582	0.326496	0.544691	0.543183	Basp1	1
R-MMU-9646399	Aggrephagy	1/91	37/8582	0.326496	0.544691	0.543183	Tubb2b	1
R-MMU-166016	Toll Like Receptor 4 (TLR4) Cascade	2/91	111/8582	0.329776	0.547492	0.545976	Map2k6/Rps6ka2	2
R-MMU-5654741	Signaling by FGFR3	1/91	38/8582	0.333669	0.551279	0.549752	Galnt3	1
R-MMU-2559582	Senescence-Associated Secretory Phenotype (SASP)	1/91	39/8582	0.340766	0.558707	0.55716	Rps6ka2	1
R-MMU-8957275	Post-translational protein phosphorylation	2/91	114/8582	0.341432	0.558707	0.55716	Mfge8/Serpind1	2
R-MMU-418990	Adherens junctions interactions	1/91	40/8582	0.347788	0.559597	0.558047	Cdh8	1
R-MMU-109704	PI3K Cascade	1/91	41/8582	0.354736	0.559597	0.558047	Fgfr1	1
R-MMU-1660662	Glycosphingolipid metabolism	1/91	41/8582	0.354736	0.559597	0.558047	Esyt3	1
R-MMU-190828	Gap junction trafficking	1/91	41/8582	0.354736	0.559597	0.558047	Tubb2b	1
R-MMU-416476	G alpha (q) signalling events	3/91	200/8582	0.356474	0.559597	0.558047	Hbegf/Rgs16/Rps6ka2	3
R-MMU-112315	Transmission across Chemical Synapses	3/91	201/8582	0.359384	0.559597	0.558047	Cacna1b/Rims1/Rps6ka2	3
R-MMU-1630316	Glycosaminoglycan metabolism	2/91	119/8582	0.36072	0.559597	0.558047	B4galt6/Chst2	2
R-MMU-112399	IRS-mediated signalling	1/91	42/8582	0.361611	0.559597	0.558047	Fgfr1	1
R-MMU-3000178	ECM proteoglycans	1/91	42/8582	0.361611	0.559597	0.558047	Col1a2	1
R-MMU-5362517	Signaling by Retinoic Acid	1/91	42/8582	0.361611	0.559597	0.558047	Pdk1	1
R-MMU-69231	Cyclin D associated events in G1	1/91	42/8582	0.361611	0.559597	0.558047	Cdkn1c	1
R-MMU-69236	G1 Phase	1/91	42/8582	0.361611	0.559597	0.558047	Cdkn1c	1
R-MMU-381426	Regulation of Insulin-like Growth Factor (IGF) transport and uptake by Insulin-like Growth Factor Binding Proteins (IGFBPs)	2/91	120/8582	0.364554	0.56161	0.560054	Mfge8/Serpind1	2
R-MMU-157858	Gap junction trafficking and regulation	1/91	43/8582	0.368413	0.565011	0.563446	Tubb2b	1
R-MMU-168643	Nucleotide-binding domain leucine rich repeat containing receptor (NLR) signaling pathways	1/91	44/8582	0.375144	0.571946	0.570361	Map2k6	1
R-MMU-2022090	Assembly of collagen fibrils and other multimeric structures	1/91	45/8582	0.381804	0.571946	0.570361	Col1a2	1
R-MMU-9006931	Signaling by Nuclear Receptors	3/91	209/8582	0.382595	0.571946	0.570361	Hbegf/Mmp2/Pdk1	3
R-MMU-8957322	Metabolism of steroids	2/91	126/8582	0.387372	0.571946	0.570361	Cyp39a1/Stard5	2
R-MMU-1227986	Signaling by ERBB2	1/91	46/8582	0.388394	0.571946	0.570361	Hbegf	1
R-MMU-177929	Signaling by EGFR	1/91	46/8582	0.388394	0.571946	0.570361	Hbegf	1
R-MMU-2428928	IRS-related events triggered by IGF1R	1/91	46/8582	0.388394	0.571946	0.570361	Fgfr1	1
R-MMU-2428924	IGF1R signaling cascade	1/91	47/8582	0.394914	0.571946	0.570361	Fgfr1	1
R-MMU-2980766	Nuclear Envelope Breakdown	1/91	47/8582	0.394914	0.571946	0.570361	Lmna	1
R-MMU-373755	Semaphorin interactions	1/91	47/8582	0.394914	0.571946	0.570361	Dpysl5	1
R-MMU-8848021	Signaling by PTK6	1/91	47/8582	0.394914	0.571946	0.570361	Hbegf	1
R-MMU-9006927	Signaling by Non-Receptor Tyrosine Kinases	1/91	47/8582	0.394914	0.571946	0.570361	Hbegf	1
R-MMU-112310	Neurotransmitter release cycle	1/91	48/8582	0.401365	0.571946	0.570361	Rims1	1
R-MMU-2404192	Signaling by Type 1 Insulin-like Growth Factor 1 Receptor (IGF1R)	1/91	48/8582	0.401365	0.571946	0.570361	Fgfr1	1
R-MMU-6811436	COPI-independent Golgi-to-ER retrograde traffic	1/91	48/8582	0.401365	0.571946	0.570361	Tubb2b	1
R-MMU-74751	Insulin receptor signalling cascade	1/91	48/8582	0.401365	0.571946	0.570361	Fgfr1	1
R-MMU-75153	Apoptotic execution phase	1/91	48/8582	0.401365	0.571946	0.570361	Lmna	1
R-MMU-913531	Interferon Signaling	2/91	131/8582	0.406118	0.57624	0.574644	Map2k6/Tubb2b	2
R-MMU-5654736	Signaling by FGFR1	1/91	49/8582	0.407749	0.57624	0.574644	Fgfr1	1
R-MMU-418555	G alpha (s) signalling events	2/91	132/8582	0.409835	0.576805	0.575208	Gpr176/Ramp2	2
R-MMU-8856828	Clathrin-mediated endocytosis	2/91	133/8582	0.413542	0.578001	0.5764	Hbegf/Syt9	2
R-MMU-186797	Signaling by PDGF	1/91	50/8582	0.414065	0.578001	0.5764	Nck2	1
R-MMU-8980692	RHOA GTPase cycle	2/91	134/8582	0.417237	0.580061	0.578454	Dlc1/Fmnl3	2
R-MMU-3371497	HSP90 chaperone cycle for steroid hormone receptors (SHR) in the presence of ligand	1/91	51/8582	0.420314	0.580463	0.578855	Tubb2b	1
R-MMU-73887	Death Receptor Signaling	2/91	135/8582	0.42092	0.580463	0.578855	Fgd4/Tiam2	2
R-MMU-983189	Kinesins	1/91	52/8582	0.426498	0.585792	0.584169	Tubb2b	1
R-MMU-8866654	E3 ubiquitin ligases ubiquitinate target proteins	1/91	53/8582	0.432616	0.589461	0.587828	Rnf152	1
R-MMU-9013406	RHOQ GTPase cycle	1/91	53/8582	0.432616	0.589461	0.587828	Dlc1	1
R-MMU-168898	Toll-like Receptor Cascades	2/91	139/8582	0.435537	0.591086	0.589449	Map2k6/Rps6ka2	2
R-MMU-5620924	Intraflagellar transport	1/91	56/8582	0.450586	0.609093	0.607405	Tubb2b	1
R-MMU-446219	Synthesis of substrates in N-glycan biosythesis	1/91	61/8582	0.479294	0.645348	0.64356	St8sia5	1
R-MMU-187037	Signaling by NTRK1 (TRKA)	1/91	62/8582	0.484854	0.645533	0.643745	Rps6ka2	1
R-MMU-70171	Glycolysis	1/91	62/8582	0.484854	0.645533	0.643745	Aldoc	1
R-MMU-397014	Muscle contraction	2/91	153/8582	0.485094	0.645533	0.643745	Kcnk5/Pde5a	2
R-MMU-174824	Plasma lipoprotein assembly remodeling and clearance	1/91	64/8582	0.495801	0.657224	0.655403	Mylip	1
R-MMU-211897	Cytochrome P450 - arranged by substrate type	1/91	65/8582	0.501187	0.659254	0.657428	Cyp39a1	1
R-MMU-9663891	Selective autophagy	1/91	65/8582	0.501187	0.659254	0.657428	Tubb2b	1
R-MMU-8939211	ESR-mediated signaling	2/91	159/8582	0.505512	0.660499	0.658669	Hbegf/Mmp2	2
R-MMU-216083	Integrin cell surface interactions	1/91	66/8582	0.506517	0.660499	0.658669	Col1a2	1
R-MMU-5658442	Regulation of RAS by GAPs	1/91	67/8582	0.51179	0.660499	0.658669	Dab2ip	1
R-MMU-6806834	Signaling by MET	1/91	67/8582	0.51179	0.660499	0.658669	Col1a2	1
R-MMU-9013026	RHOB GTPase cycle	1/91	67/8582	0.51179	0.660499	0.658669	Dlc1	1
R-MMU-204005	COPII-mediated vesicle transport	1/91	68/8582	0.517007	0.664575	0.662734	Cd59b	1
R-MMU-1428517	The citric acid (TCA) cycle and respiratory electron transport	2/91	163/8582	0.518835	0.664575	0.662734	Pdk1/Suclg2	2
R-MMU-5673001	RAF/MAP kinase cascade	3/91	262/8582	0.529186	0.674286	0.672419	Dab2ip/Fgfr1/Hbegf	3
R-MMU-71387	Metabolism of carbohydrates	3/91	263/8582	0.531779	0.674286	0.672419	Aldoc/B4galt6/Chst2	3
R-MMU-446193	Biosynthesis of the N-glycan precursor (dolichol lipid-linked oligosaccharide LLO) and transfer to a nascent protein	1/91	71/8582	0.532331	0.674286	0.672419	St8sia5	1
R-MMU-418346	Platelet homeostasis	1/91	73/8582	0.542279	0.681836	0.679948	Pde5a	1
R-MMU-8852135	Protein ubiquitination	1/91	73/8582	0.542279	0.681836	0.679948	Rnf152	1
R-MMU-5684996	MAPK1/MAPK3 signaling	3/91	268/8582	0.544623	0.682275	0.680385	Dab2ip/Fgfr1/Hbegf	3
R-MMU-166520	Signaling by NTRKs	1/91	74/8582	0.547174	0.682969	0.681077	Rps6ka2	1
R-MMU-74752	Signaling by Insulin receptor	1/91	75/8582	0.552018	0.684022	0.682127	Fgfr1	1
R-MMU-8852276	The role of GTSE1 in G2/M progression after G2 checkpoint	1/91	75/8582	0.552018	0.684022	0.682127	Tubb2b	1
R-MMU-428157	Sphingolipid metabolism	1/91	78/8582	0.566242	0.699115	0.697178	Esyt3	1
R-MMU-70326	Glucose metabolism	1/91	80/8582	0.575476	0.70796	0.705999	Aldoc	1
R-MMU-5683057	MAPK family signaling cascades	3/91	291/8582	0.60104	0.736758	0.734717	Dab2ip/Fgfr1/Hbegf	3
R-MMU-380320	Recruitment of NuMA to mitotic centrosomes	1/91	87/8582	0.60629	0.737905	0.735861	Tubb2b	1
R-MMU-4086400	PCP/CE pathway	1/91	87/8582	0.60629	0.737905	0.735861	Ror1	1
R-MMU-202733	Cell surface interactions at the vascular wall	1/91	89/8582	0.614681	0.745464	0.743399	Col1a2	1
R-MMU-6811434	COPI-dependent Golgi-to-ER retrograde traffic	1/91	91/8582	0.622894	0.752755	0.75067	Tubb2b	1
R-MMU-15869	Metabolism of nucleotides	1/91	94/8582	0.634891	0.76318	0.761066	Ak5	1
R-MMU-198933	Immunoregulatory interactions between a Lymphoid and a non-Lymphoid cell	1/91	95/8582	0.638805	0.76318	0.761066	Col1a2	1
R-MMU-2672351	Stimuli-sensing channels	1/91	95/8582	0.638805	0.76318	0.761066	Ttyh3	1
R-MMU-5668541	TNFR2 non-canonical NF-kB pathway	1/91	96/8582	0.642678	0.76318	0.761066	Tnfrsf13c	1
R-MMU-5689603	UCH proteinases	1/91	96/8582	0.642678	0.76318	0.761066	Uchl1	1
R-MMU-5576891	Cardiac conduction	1/91	98/8582	0.650301	0.766906	0.764782	Kcnk5	1
R-MMU-9748784	Drug ADME	1/91	98/8582	0.650301	0.766906	0.764782	Abcc4	1
R-MMU-382556	ABC-family proteins mediated transport	1/91	99/8582	0.654052	0.768679	0.76655	Abcc4	1
R-MMU-109581	Apoptosis	1/91	101/8582	0.661434	0.774694	0.772548	Lmna	1
R-MMU-9020702	Interleukin-1 signaling	1/91	102/8582	0.665067	0.77629	0.77414	Map2k6	1
R-MMU-2132295	MHC class II antigen presentation	1/91	103/8582	0.668661	0.777457	0.775304	Tubb2b	1
R-MMU-112316	Neuronal System	3/91	323/8582	0.671702	0.777457	0.775304	Cacna1b/Rims1/Rps6ka2	3
R-MMU-68882	Mitotic Anaphase	2/91	218/8582	0.677256	0.777457	0.775304	Lmna/Tubb2b	2
R-MMU-5610787	Hedgehog 'off' state	1/91	106/8582	0.679217	0.777457	0.775304	Tubb2b	1
R-MMU-9648025	EML4 and NUDC in mitotic spindle formation	1/91	106/8582	0.679217	0.777457	0.775304	Tubb2b	1
R-MMU-2555396	Mitotic Metaphase and Anaphase	2/91	219/8582	0.679707	0.777457	0.775304	Lmna/Tubb2b	2
R-MMU-196849	Metabolism of water-soluble vitamins and cofactors	1/91	110/8582	0.692775	0.789763	0.787575	Aldh1l2	1
R-MMU-195721	Signaling by WNT	2/91	229/8582	0.703398	0.794929	0.792727	Ror1/Sox13	2
R-MMU-1280215	Cytokine Signaling in Immune system	4/91	447/8582	0.705176	0.794929	0.792727	Map2k6/Rps6ka2/Tnfrsf13c/Tubb2b	4
R-MMU-1257604	PIP3 activates AKT signaling	2/91	230/8582	0.705686	0.794929	0.792727	Fgfr1/Hbegf	2
R-MMU-1483206	Glycerophospholipid biosynthesis	1/91	115/8582	0.708928	0.794929	0.792727	Lpcat2	1
R-MMU-446652	Interleukin-1 family signaling	1/91	115/8582	0.708928	0.794929	0.792727	Map2k6	1
R-MMU-2500257	Resolution of Sister Chromatid Cohesion	1/91	117/8582	0.715151	0.799287	0.797072	Tubb2b	1
R-MMU-68875	Mitotic Prophase	1/91	119/8582	0.721243	0.801586	0.799366	Lmna	1
R-MMU-1632852	Macroautophagy	1/91	120/8582	0.72424	0.801586	0.799366	Tubb2b	1
R-MMU-9612973	Autophagy	1/91	120/8582	0.72424	0.801586	0.799366	Tubb2b	1
R-MMU-983231	Factors involved in megakaryocyte development and platelet production	1/91	122/8582	0.73014	0.805509	0.803278	Tubb2b	1
R-MMU-3858494	Beta-catenin independent WNT signaling	1/91	124/8582	0.735914	0.806675	0.804441	Ror1	1
R-MMU-8856688	Golgi-to-ER retrograde transport	1/91	124/8582	0.735914	0.806675	0.804441	Tubb2b	1
R-MMU-453279	Mitotic G1 phase and G1/S transition	1/91	127/8582	0.744348	0.813313	0.81106	Cdkn1c	1
R-MMU-5357801	Programmed Cell Death	1/91	132/8582	0.757816	0.825392	0.823105	Lmna	1
R-MMU-9006925	Intracellular signaling by second messengers	2/91	256/8582	0.76024	0.825404	0.823117	Fgfr1/Hbegf	2
R-MMU-112314	Neurotransmitter receptors and postsynaptic signal transmission	1/91	138/8582	0.773054	0.83402	0.83171	Rps6ka2	1
R-MMU-5358351	Signaling by Hedgehog	1/91	138/8582	0.773054	0.83402	0.83171	Tubb2b	1
R-MMU-449147	Signaling by Interleukins	2/91	266/8582	0.778807	0.837585	0.835264	Map2k6/Rps6ka2	2
R-MMU-418594	G alpha (i) signalling events	2/91	274/8582	0.792754	0.847172	0.844825	Rgs16/S1pr2	2
R-MMU-5633007	Regulation of TP53 Activity	1/91	147/8582	0.79415	0.847172	0.844825	Map2k6	1
R-MMU-500792	GPCR ligand binding	3/91	394/8582	0.795153	0.847172	0.844825	Cd55/Ramp2/S1pr2	3
R-MMU-201681	TCF dependent signaling in response to WNT	1/91	150/8582	0.800741	0.850477	0.848121	Sox13	1
R-MMU-983168	Antigen processing: Ubiquitination & Proteasome degradation	2/91	285/8582	0.810679	0.857363	0.854988	Lmo7/Mylip	2
R-MMU-3700989	Transcriptional Regulation by TP53	2/91	286/8582	0.812239	0.857363	0.854988	Map2k6/Prelid3a	2
R-MMU-196854	Metabolism of vitamins and cofactors	1/91	169/8582	0.8379	0.879024	0.876589	Aldh1l2	1
R-MMU-983712	Ion channel transport	1/91	169/8582	0.8379	0.879024	0.876589	Ttyh3	1
R-MMU-69275	G2/M Transition	1/91	175/8582	0.848142	0.884409	0.881959	Tubb2b	1
R-MMU-453274	Mitotic G2-G2/M phases	1/91	177/8582	0.851412	0.884409	0.881959	Tubb2b	1
R-MMU-2262752	Cellular responses to stress	3/91	440/8582	0.852741	0.884409	0.881959	Map2k6/Rps6ka2/Tubb2b	3
R-MMU-6811442	Intra-Golgi and retrograde Golgi-to-ER traffic	1/91	179/8582	0.854613	0.884409	0.881959	Tubb2b	1
R-MMU-8953897	Cellular responses to stimuli	3/91	443/8582	0.855963	0.884409	0.881959	Map2k6/Rps6ka2/Tubb2b	3
R-MMU-2467813	Separation of Sister Chromatids	1/91	182/8582	0.859286	0.885168	0.882716	Tubb2b	1
R-MMU-5617833	Cilium Assembly	1/91	185/8582	0.86381	0.887156	0.884699	Tubb2b	1
R-MMU-68877	Mitotic Prometaphase	1/91	187/8582	0.866746	0.887506	0.885048	Tubb2b	1
R-MMU-983169	Class I MHC mediated antigen processing & presentation	2/91	342/8582	0.883296	0.901753	0.899255	Lmo7/Mylip	2
R-MMU-1852241	Organelle biogenesis and maintenance	1/91	212/8582	0.898568	0.914614	0.91208	Tubb2b	1
R-MMU-69278	Cell Cycle Mitotic	3/91	498/8582	0.905095	0.9178	0.915257	Cdkn1c/Lmna/Tubb2b	3
R-MMU-8951664	Neddylation	1/91	220/8582	0.907065	0.9178	0.915257	Lmo7	1
R-MMU-68886	M Phase	2/91	382/8582	0.917977	0.926101	0.923535	Lmna/Tubb2b	2
R-MMU-5688426	Deubiquitination	1/91	246/8582	0.930106	0.935105	0.932515	Uchl1	1
R-MMU-71291	Metabolism of amino acids and derivatives	1/91	249/8582	0.932371	0.935105	0.932515	Cbs	1
R-MMU-373076	Class A/1 (Rhodopsin-like receptors)	1/91	307/8582	0.964306	0.964306	0.961635	S1pr2	1

## Sheet: GO_DGE_MOL2_MOL56_Ctrl
ID	Description	GeneRatio	BgRatio	pvalue	p.adjust	qvalue	geneID	Count	Significant
R-MMU-190872	Transport of connexons to the plasma membrane	2/22	17/8582	0.000833548	0.0975252	0.0851097	Gjb2/Tubb2b	2
R-MMU-190861	Gap junction assembly	2/22	32/8582	0.00297007	0.155488	0.135694	Gjb2/Tubb2b	2
R-MMU-190828	Gap junction trafficking	2/22	41/8582	0.0048422	0.155488	0.135694	Gjb2/Tubb2b	2
R-MMU-157858	Gap junction trafficking and regulation	2/22	43/8582	0.00531583	0.155488	0.135694	Gjb2/Tubb2b	2
R-MMU-983189	Kinesins	2/22	52/8582	0.00769801	0.180133	0.157201	Kif19a/Tubb2b	2
R-MMU-1474244	Extracellular matrix organization	3/22	230/8582	0.0200887	0.217833	0.190102	Nid1/Fbln2/Colgalt2	3
R-MMU-1500931	Cell-Cell communication	2/22	91/8582	0.0223847	0.217833	0.190102	Sdk2/Ptk2b	2
R-MMU-6807878	COPI-mediated anterograde transport	2/22	91/8582	0.0223847	0.217833	0.190102	Cd55/Tubb2b	2
R-MMU-6811434	COPI-dependent Golgi-to-ER retrograde traffic	2/22	91/8582	0.0223847	0.217833	0.190102	Kif19a/Tubb2b	2
R-MMU-3000157	Laminin interactions	1/22	10/8582	0.0253545	0.217833	0.190102	Nid1	1
R-MMU-391160	Signal regulatory protein family interactions	1/22	10/8582	0.0253545	0.217833	0.190102	Ptk2b	1
R-MMU-9020558	Interleukin-2 signaling	1/22	10/8582	0.0253545	0.217833	0.190102	Ptk2b	1
R-MMU-446203	Asparagine N-linked glycosylation	3/22	256/8582	0.0265717	0.217833	0.190102	St8sia5/Cd55/Tubb2b	3
R-MMU-5140745	WNT5A-dependent internalization of FZD2 FZD5 and ROR2	1/22	11/8582	0.0278559	0.217833	0.190102	Ror1	1
R-MMU-190239	FGFR3 ligand binding and activation	1/22	12/8582	0.0303512	0.217833	0.190102	Galnt3	1
R-MMU-190372	FGFR3c ligand binding and activation	1/22	12/8582	0.0303512	0.217833	0.190102	Galnt3	1
R-MMU-418594	G alpha (i) signalling events	3/22	274/8582	0.0316509	0.217833	0.190102	Npb/Grm4/Rgs16	3
R-MMU-983231	Factors involved in megakaryocyte development and platelet production	2/22	122/8582	0.03847	0.235588	0.205596	Kif19a/Tubb2b	2
R-MMU-8856688	Golgi-to-ER retrograde transport	2/22	124/8582	0.0396252	0.235588	0.205596	Kif19a/Tubb2b	2
R-MMU-190840	Microtubule-dependent trafficking of connexons from Golgi to the plasma membrane	1/22	16/8582	0.0402714	0.235588	0.205596	Tubb2b	1
R-MMU-199977	ER to Golgi Anterograde Transport	2/22	143/8582	0.0512425	0.285494	0.249149	Cd55/Tubb2b	2
R-MMU-9668328	Sealing of the nuclear envelope (NE) by ESCRT-III	1/22	26/8582	0.0646498	0.293913	0.256496	Tubb2b	1
R-MMU-8955332	Carboxyterminal post-translational modifications of tubulin	1/22	27/8582	0.0670548	0.293913	0.256496	Tubb2b	1
R-MMU-948021	Transport to the Golgi and subsequent modification	2/22	171/8582	0.070288	0.293913	0.256496	Cd55/Tubb2b	2
R-MMU-5626467	RHO GTPases activate IQGAPs	1/22	30/8582	0.0742346	0.293913	0.256496	Tubb2b	1
R-MMU-6811442	Intra-Golgi and retrograde Golgi-to-ER traffic	2/22	179/8582	0.0761055	0.293913	0.256496	Kif19a/Tubb2b	2
R-MMU-420499	Class C/3 (Metabotropic glutamate/pheromone receptors)	1/22	31/8582	0.0766162	0.293913	0.256496	Grm4	1
R-MMU-500792	GPCR ligand binding	3/22	394/8582	0.0775056	0.293913	0.256496	Npb/Cd55/Grm4	3
R-MMU-2129379	Molecules associated with elastic fibres	1/22	32/8582	0.0789918	0.293913	0.256496	Fbln2	1
R-MMU-418597	G alpha (z) signalling events	1/22	32/8582	0.0789918	0.293913	0.256496	Rgs16	1
R-MMU-4085001	Sialic acid metabolism	1/22	33/8582	0.0813617	0.293913	0.256496	St8sia5	1
R-MMU-451927	Interleukin-2 family signaling	1/22	34/8582	0.0837257	0.293913	0.256496	Ptk2b	1
R-MMU-437239	Recycling pathway of L1	1/22	35/8582	0.0860839	0.293913	0.256496	Tubb2b	1
R-MMU-9013420	RHOU GTPase cycle	1/22	36/8582	0.0884364	0.293913	0.256496	Ptk2b	1
R-MMU-977606	Regulation of Complement cascade	1/22	36/8582	0.0884364	0.293913	0.256496	Cd55	1
R-MMU-9646399	Aggrephagy	1/22	37/8582	0.090783	0.293913	0.256496	Tubb2b	1
R-MMU-5654741	Signaling by FGFR3	1/22	38/8582	0.0931239	0.293913	0.256496	Galnt3	1
R-MMU-1566948	Elastic fibre formation	1/22	39/8582	0.095459	0.293913	0.256496	Fbln2	1
R-MMU-69231	Cyclin D associated events in G1	1/22	42/8582	0.10243	0.299608	0.261466	Cdkn1c	1
R-MMU-69236	G1 Phase	1/22	42/8582	0.10243	0.299608	0.261466	Cdkn1c	1
R-MMU-166658	Complement cascade	1/22	46/8582	0.111645	0.316222	0.275965	Cd55	1
R-MMU-421270	Cell-cell junction organization	1/22	48/8582	0.116218	0.316222	0.275965	Sdk2	1
R-MMU-6811436	COPI-independent Golgi-to-ER retrograde traffic	1/22	48/8582	0.116218	0.316222	0.275965	Tubb2b	1
R-MMU-3371497	HSP90 chaperone cycle for steroid hormone receptors (SHR) in the presence of ligand	1/22	51/8582	0.123037	0.320649	0.279828	Tubb2b	1
R-MMU-8866654	E3 ubiquitin ligases ubiquitinate target proteins	1/22	53/8582	0.127554	0.320649	0.279828	Rnf152	1
R-MMU-9013406	RHOQ GTPase cycle	1/22	53/8582	0.127554	0.320649	0.279828	Dlc1	1
R-MMU-913709	O-linked glycosylation of mucins	1/22	54/8582	0.129804	0.320649	0.279828	Galnt3	1
R-MMU-373080	Class B/2 (Secretin family receptors)	1/22	56/8582	0.134289	0.320649	0.279828	Cd55	1
R-MMU-5620924	Intraflagellar transport	1/22	56/8582	0.134289	0.320649	0.279828	Tubb2b	1
R-MMU-1650814	Collagen biosynthesis and modifying enzymes	1/22	60/8582	0.143191	0.32139	0.280475	Colgalt2	1
R-MMU-446219	Synthesis of substrates in N-glycan biosythesis	1/22	61/8582	0.145403	0.32139	0.280475	St8sia5	1
R-MMU-373760	L1CAM interactions	1/22	63/8582	0.14981	0.32139	0.280475	Tubb2b	1
R-MMU-2995410	Nuclear Envelope (NE) Reassembly	1/22	64/8582	0.152006	0.32139	0.280475	Tubb2b	1
R-MMU-9833482	PKR-mediated signaling	1/22	64/8582	0.152006	0.32139	0.280475	Tubb2b	1
R-MMU-9663891	Selective autophagy	1/22	65/8582	0.154196	0.32139	0.280475	Tubb2b	1
R-MMU-9013026	RHOB GTPase cycle	1/22	67/8582	0.15856	0.32139	0.280475	Dlc1	1
R-MMU-9013106	RHOC GTPase cycle	1/22	67/8582	0.15856	0.32139	0.280475	Dlc1	1
R-MMU-425366	Transport of bile salts and organic acids metal ions and amine compounds	1/22	70/8582	0.165066	0.32139	0.280475	Slc13a3	1
R-MMU-446193	Biosynthesis of the N-glycan precursor (dolichol lipid-linked oligosaccharide LLO) and transfer to a nascent protein	1/22	71/8582	0.167224	0.32139	0.280475	St8sia5	1
R-MMU-446728	Cell junction organization	1/22	72/8582	0.169377	0.32139	0.280475	Sdk2	1
R-MMU-1474290	Collagen formation	1/22	73/8582	0.171524	0.32139	0.280475	Colgalt2	1
R-MMU-8852135	Protein ubiquitination	1/22	73/8582	0.171524	0.32139	0.280475	Rnf152	1
R-MMU-190236	Signaling by FGFR	1/22	75/8582	0.175803	0.32139	0.280475	Galnt3	1
R-MMU-8852276	The role of GTSE1 in G2/M progression after G2 checkpoint	1/22	75/8582	0.175803	0.32139	0.280475	Tubb2b	1
R-MMU-163125	Post-translational modification: synthesis of GPI-anchored proteins	1/22	81/8582	0.188513	0.339323	0.296126	Art3	1
R-MMU-9013148	CDC42 GTPase cycle	1/22	84/8582	0.194798	0.345323	0.301362	Dlc1	1
R-MMU-380320	Recruitment of NuMA to mitotic centrosomes	1/22	87/8582	0.201036	0.3459	0.301865	Tubb2b	1
R-MMU-4086400	PCP/CE pathway	1/22	87/8582	0.201036	0.3459	0.301865	Ror1	1
R-MMU-1169410	Antiviral mechanism by IFN-stimulated genes	1/22	91/8582	0.209282	0.353224	0.308256	Tubb2b	1
R-MMU-4420097	VEGFA-VEGFR2 Pathway	1/22	92/8582	0.21133	0.353224	0.308256	Ptk2b	1
R-MMU-2672351	Stimuli-sensing channels	1/22	95/8582	0.217446	0.358327	0.31271	Slc9b2	1
R-MMU-5173105	O-linked glycosylation	1/22	97/8582	0.221498	0.359935	0.314113	Galnt3	1
R-MMU-194138	Signaling by VEGF	1/22	100/8582	0.227539	0.363894	0.317569	Ptk2b	1
R-MMU-2132295	MHC class II antigen presentation	1/22	103/8582	0.233535	0.363894	0.317569	Tubb2b	1
R-MMU-1474228	Degradation of the extracellular matrix	1/22	106/8582	0.239486	0.363894	0.317569	Nid1	1
R-MMU-5610787	Hedgehog 'off' state	1/22	106/8582	0.239486	0.363894	0.317569	Tubb2b	1
R-MMU-9648025	EML4 and NUDC in mitotic spindle formation	1/22	106/8582	0.239486	0.363894	0.317569	Tubb2b	1
R-MMU-2500257	Resolution of Sister Chromatid Cohesion	1/22	117/8582	0.260932	0.386633	0.337413	Tubb2b	1
R-MMU-1632852	Macroautophagy	1/22	120/8582	0.266681	0.386633	0.337413	Tubb2b	1
R-MMU-9612973	Autophagy	1/22	120/8582	0.266681	0.386633	0.337413	Tubb2b	1
R-MMU-9012999	RHO GTPase cycle	2/22	395/8582	0.268897	0.386633	0.337413	Dlc1/Ptk2b	2
R-MMU-9006934	Signaling by Receptor Tyrosine Kinases	2/22	400/8582	0.273732	0.386633	0.337413	Galnt3/Ptk2b	2
R-MMU-3858494	Beta-catenin independent WNT signaling	1/22	124/8582	0.274278	0.386633	0.337413	Ror1	1
R-MMU-453279	Mitotic G1 phase and G1/S transition	1/22	127/8582	0.279927	0.389899	0.340262	Cdkn1c	1
R-MMU-5663220	RHO GTPases Activate Formins	1/22	131/8582	0.287394	0.390989	0.341214	Tubb2b	1
R-MMU-913531	Interferon Signaling	1/22	131/8582	0.287394	0.390989	0.341214	Tubb2b	1
R-MMU-8980692	RHOA GTPase cycle	1/22	134/8582	0.292945	0.393961	0.343808	Dlc1	1
R-MMU-5358351	Signaling by Hedgehog	1/22	138/8582	0.300283	0.39924	0.348415	Tubb2b	1
R-MMU-1280215	Cytokine Signaling in Immune system	2/22	447/8582	0.319142	0.419546	0.366136	Ptk2b/Tubb2b	2
R-MMU-9013149	RAC1 GTPase cycle	1/22	163/8582	0.344523	0.44788	0.390863	Dlc1	1
R-MMU-983712	Ion channel transport	1/22	169/8582	0.354736	0.453366	0.39565	Slc9b2	1
R-MMU-109582	Hemostasis	2/22	492/8582	0.362193	0.453366	0.39565	Kif19a/Tubb2b	2
R-MMU-69275	G2/M Transition	1/22	175/8582	0.364798	0.453366	0.39565	Tubb2b	1
R-MMU-69278	Cell Cycle Mitotic	2/22	498/8582	0.367878	0.453366	0.39565	Cdkn1c/Tubb2b	2
R-MMU-453274	Mitotic G2-G2/M phases	1/22	177/8582	0.368118	0.453366	0.39565	Tubb2b	1
R-MMU-2467813	Separation of Sister Chromatids	1/22	182/8582	0.376347	0.454377	0.396532	Tubb2b	1
R-MMU-5617833	Cilium Assembly	1/22	185/8582	0.381234	0.454377	0.396532	Tubb2b	1
R-MMU-375276	Peptide ligand-binding receptors	1/22	186/8582	0.382856	0.454377	0.396532	Npb	1
R-MMU-68877	Mitotic Prometaphase	1/22	187/8582	0.384473	0.454377	0.396532	Tubb2b	1
R-MMU-416476	G alpha (q) signalling events	1/22	200/8582	0.40513	0.474002	0.413659	Rgs16	1
R-MMU-1852241	Organelle biogenesis and maintenance	1/22	212/8582	0.42361	0.48541	0.423615	Tubb2b	1
R-MMU-425407	SLC-mediated transmembrane transport	1/22	218/8582	0.432643	0.48541	0.423615	Slc13a3	1
R-MMU-68882	Mitotic Anaphase	1/22	218/8582	0.432643	0.48541	0.423615	Tubb2b	1
R-MMU-2555396	Mitotic Metaphase and Anaphase	1/22	219/8582	0.434136	0.48541	0.423615	Tubb2b	1
R-MMU-8951664	Neddylation	1/22	220/8582	0.435624	0.48541	0.423615	Lmo7	1
R-MMU-195721	Signaling by WNT	1/22	229/8582	0.448854	0.495434	0.432362	Ror1	1
R-MMU-195258	RHO GTPase Effectors	1/22	238/8582	0.461788	0.504946	0.440664	Tubb2b	1
R-MMU-422475	Axon guidance	1/22	249/8582	0.477203	0.513708	0.44831	Tubb2b	1
R-MMU-9675108	Nervous system development	1/22	250/8582	0.478583	0.513708	0.44831	Tubb2b	1
R-MMU-449147	Signaling by Interleukins	1/22	266/8582	0.500199	0.53203	0.4643	Ptk2b	1
R-MMU-983168	Antigen processing: Ubiquitination & Proteasome degradation	1/22	285/8582	0.524758	0.553124	0.482708	Lmo7	1
R-MMU-373076	Class A/1 (Rhodopsin-like receptors)	1/22	307/8582	0.551756	0.576388	0.503011	Npb	1
R-MMU-983169	Class I MHC mediated antigen processing & presentation	1/22	342/8582	0.591713	0.612659	0.534664	Lmo7	1
R-MMU-68886	M Phase	1/22	382/8582	0.633215	0.649878	0.567145	Tubb2b	1
R-MMU-2262752	Cellular responses to stress	1/22	440/8582	0.686308	0.692195	0.604075	Tubb2b	1
R-MMU-8953897	Cellular responses to stimuli	1/22	443/8582	0.688844	0.692195	0.604075	Tubb2b	1
R-MMU-1266738	Developmental Biology	1/22	447/8582	0.692195	0.692195	0.604075	Tubb2b	1

## Sheet: GO_DGE_MOL2_MOL56_Early
ID	Description	GeneRatio	BgRatio	pvalue	p.adjust	qvalue	geneID	Count	Significant
R-MMU-1474244	Extracellular matrix organization	5/21	230/8582	0.000189581	0.016304	0.0137696	Fbln2/Col1a2/Colgalt2/Nid1/Col22a1	5	*
R-MMU-1650814	Collagen biosynthesis and modifying enzymes	3/21	60/8582	0.000395092	0.016989	0.0143481	Col1a2/Colgalt2/Col22a1	3	*
R-MMU-1474290	Collagen formation	3/21	73/8582	0.000703554	0.0201685	0.0170334	Col1a2/Colgalt2/Col22a1	3	*
R-MMU-8948216	Collagen chain trimerization	2/21	35/8582	0.00323221	0.0694925	0.0586901	Col1a2/Col22a1	2
R-MMU-500792	GPCR ligand binding	4/21	394/8582	0.0140691	0.200513	0.169344	Npb/Grm4/Cd55/Lpar3	4
R-MMU-3000157	Laminin interactions	1/21	10/8582	0.0242147	0.200513	0.169344	Nid1	1
R-MMU-75892	Platelet Adhesion to exposed collagen	1/21	10/8582	0.0242147	0.200513	0.169344	Col1a2	1
R-MMU-389359	CD28 dependent Vav1 pathway	1/21	11/8582	0.0266052	0.200513	0.169344	Cd86	1
R-MMU-430116	GP1b-IX-V activation signalling	1/21	11/8582	0.0266052	0.200513	0.169344	Col1a2	1
R-MMU-5140745	WNT5A-dependent internalization of FZD2 FZD5 and ROR2	1/21	11/8582	0.0266052	0.200513	0.169344	Ror1	1
R-MMU-1474228	Degradation of the extracellular matrix	2/21	106/8582	0.0272401	0.200513	0.169344	Col1a2/Nid1	2
R-MMU-418594	G alpha (i) signalling events	3/21	274/8582	0.0279786	0.200513	0.169344	Npb/Grm4/Lpar3	3
R-MMU-419408	Lysosphingolipid and LPA receptors	1/21	14/8582	0.0337433	0.220586	0.186297	Lpar3	1
R-MMU-2243919	Crosslinking of collagen fibrils	1/21	15/8582	0.0361116	0.220586	0.186297	Col1a2	1
R-MMU-6788467	IL-6-type cytokine receptor ligand interactions	1/21	16/8582	0.0384743	0.220586	0.186297	Clcf1	1
R-MMU-389513	CTLA4 inhibitory signaling	1/21	20/8582	0.0478703	0.237792	0.200828	Cd86	1
R-MMU-8874081	MET activates PTK2 signaling	1/21	20/8582	0.0478703	0.237792	0.200828	Col1a2	1
R-MMU-389357	CD28 dependent PI3K/Akt signaling	1/21	22/8582	0.0525354	0.237792	0.200828	Cd86	1
R-MMU-6783589	Interleukin-6 family signaling	1/21	22/8582	0.0525354	0.237792	0.200828	Clcf1	1
R-MMU-8875878	MET promotes cell motility	1/21	30/8582	0.0709791	0.269425	0.227544	Col1a2	1
R-MMU-420499	Class C/3 (Metabotropic glutamate/pheromone receptors)	1/21	31/8582	0.0732604	0.269425	0.227544	Grm4	1
R-MMU-2129379	Molecules associated with elastic fibres	1/21	32/8582	0.0755363	0.269425	0.227544	Fbln2	1
R-MMU-3000171	Non-integrin membrane-ECM interactions	1/21	32/8582	0.0755363	0.269425	0.227544	Col1a2	1
R-MMU-389356	CD28 co-stimulation	1/21	32/8582	0.0755363	0.269425	0.227544	Cd86	1
R-MMU-114604	GPVI-mediated activation cascade	1/21	34/8582	0.0800722	0.269425	0.227544	Col1a2	1
R-MMU-76009	Platelet Aggregation (Plug Formation)	1/21	36/8582	0.0845869	0.269425	0.227544	Col1a2	1
R-MMU-977606	Regulation of Complement cascade	1/21	36/8582	0.0845869	0.269425	0.227544	Cd55	1
R-MMU-1566948	Elastic fibre formation	1/21	39/8582	0.0913195	0.271884	0.229621	Fbln2	1
R-MMU-3000178	ECM proteoglycans	1/21	42/8582	0.0980048	0.271884	0.229621	Col1a2	1
R-MMU-69231	Cyclin D associated events in G1	1/21	42/8582	0.0980048	0.271884	0.229621	Cdkn1c	1
R-MMU-69236	G1 Phase	1/21	42/8582	0.0980048	0.271884	0.229621	Cdkn1c	1
R-MMU-2022090	Assembly of collagen fibrils and other multimeric structures	1/21	45/8582	0.104643	0.278447	0.235163	Col1a2	1
R-MMU-166658	Complement cascade	1/21	46/8582	0.106846	0.278447	0.235163	Cd55	1
R-MMU-421270	Cell-cell junction organization	1/21	48/8582	0.111235	0.28108	0.237387	Sdk2	1
R-MMU-983189	Kinesins	1/21	52/8582	0.119953	0.28108	0.237387	Kif19a	1
R-MMU-8866654	E3 ubiquitin ligases ubiquitinate target proteins	1/21	53/8582	0.122119	0.28108	0.237387	Rnf152	1
R-MMU-9013406	RHOQ GTPase cycle	1/21	53/8582	0.122119	0.28108	0.237387	Dlc1	1
R-MMU-1442490	Collagen degradation	1/21	55/8582	0.126437	0.28108	0.237387	Col1a2	1
R-MMU-373080	Class B/2 (Secretin family receptors)	1/21	56/8582	0.128589	0.28108	0.237387	Cd55	1
R-MMU-388841	Costimulation by the CD28 family	1/21	57/8582	0.130735	0.28108	0.237387	Cd86	1
R-MMU-216083	Integrin cell surface interactions	1/21	66/8582	0.149827	0.296941	0.250782	Col1a2	1
R-MMU-6806834	Signaling by MET	1/21	67/8582	0.151923	0.296941	0.250782	Col1a2	1
R-MMU-9013026	RHOB GTPase cycle	1/21	67/8582	0.151923	0.296941	0.250782	Dlc1	1
R-MMU-9013106	RHOC GTPase cycle	1/21	67/8582	0.151923	0.296941	0.250782	Dlc1	1
R-MMU-425366	Transport of bile salts and organic acids metal ions and amine compounds	1/21	70/8582	0.158183	0.300815	0.254054	Slc13a3	1
R-MMU-446728	Cell junction organization	1/21	72/8582	0.162332	0.300815	0.254054	Sdk2	1
R-MMU-8852135	Protein ubiquitination	1/21	73/8582	0.164399	0.300815	0.254054	Rnf152	1
R-MMU-373076	Class A/1 (Rhodopsin-like receptors)	2/21	307/8582	0.171993	0.308155	0.260253	Npb/Lpar3	2
R-MMU-163125	Post-translational modification: synthesis of GPI-anchored proteins	1/21	81/8582	0.180762	0.313957	0.265153	Art3	1
R-MMU-9013148	CDC42 GTPase cycle	1/21	84/8582	0.186819	0.313957	0.265153	Dlc1	1
R-MMU-4086400	PCP/CE pathway	1/21	87/8582	0.192833	0.313957	0.265153	Ror1	1
R-MMU-202733	Cell surface interactions at the vascular wall	1/21	89/8582	0.196819	0.313957	0.265153	Col1a2	1
R-MMU-1500931	Cell-Cell communication	1/21	91/8582	0.200786	0.313957	0.265153	Sdk2	1
R-MMU-6807878	COPI-mediated anterograde transport	1/21	91/8582	0.200786	0.313957	0.265153	Cd55	1
R-MMU-6811434	COPI-dependent Golgi-to-ER retrograde traffic	1/21	91/8582	0.200786	0.313957	0.265153	Kif19a	1
R-MMU-198933	Immunoregulatory interactions between a Lymphoid and a non-Lymphoid cell	1/21	95/8582	0.208665	0.314828	0.265889	Col1a2	1
R-MMU-2672351	Stimuli-sensing channels	1/21	95/8582	0.208665	0.314828	0.265889	Slc9b2	1
R-MMU-6811558	PI5P PP2A and IER3 Regulate PI3K/AKT Signaling	1/21	99/8582	0.21647	0.320972	0.271078	Cd86	1
R-MMU-199418	Negative regulation of the PI3K/AKT network	1/21	106/8582	0.229951	0.335184	0.28308	Cd86	1
R-MMU-983231	Factors involved in megakaryocyte development and platelet production	1/21	122/8582	0.259943	0.365656	0.308816	Kif19a	1
R-MMU-3858494	Beta-catenin independent WNT signaling	1/21	124/8582	0.263612	0.365656	0.308816	Ror1	1
R-MMU-8856688	Golgi-to-ER retrograde transport	1/21	124/8582	0.263612	0.365656	0.308816	Kif19a	1
R-MMU-453279	Mitotic G1 phase and G1/S transition	1/21	127/8582	0.269084	0.367322	0.310223	Cdkn1c	1
R-MMU-8980692	RHOA GTPase cycle	1/21	134/8582	0.281702	0.378538	0.319695	Dlc1	1
R-MMU-199977	ER to Golgi Anterograde Transport	1/21	143/8582	0.297621	0.393775	0.332564	Cd55	1
R-MMU-9013149	RAC1 GTPase cycle	1/21	163/8582	0.331801	0.43003	0.363183	Dlc1	1
R-MMU-109582	Hemostasis	2/21	492/8582	0.340971	0.43003	0.363183	Col1a2/Kif19a	2
R-MMU-983712	Ion channel transport	1/21	169/8582	0.341742	0.43003	0.363183	Slc9b2	1
R-MMU-948021	Transport to the Golgi and subsequent modification	1/21	171/8582	0.345024	0.43003	0.363183	Cd55	1
R-MMU-6811442	Intra-Golgi and retrograde Golgi-to-ER traffic	1/21	179/8582	0.357998	0.439826	0.371457	Kif19a	1
R-MMU-375276	Peptide ligand-binding receptors	1/21	186/8582	0.369149	0.447139	0.377632	Npb	1
R-MMU-416476	G alpha (q) signalling events	1/21	200/8582	0.390901	0.466909	0.39433	Lpar3	1
R-MMU-425407	SLC-mediated transmembrane transport	1/21	218/8582	0.417819	0.488966	0.412958	Slc13a3	1
R-MMU-8951664	Neddylation	1/21	220/8582	0.420738	0.488966	0.412958	Lmo7	1
R-MMU-195721	Signaling by WNT	1/21	229/8582	0.433706	0.492384	0.415845	Ror1	1
R-MMU-1257604	PIP3 activates AKT signaling	1/21	230/8582	0.43513	0.492384	0.415845	Cd86	1
R-MMU-76002	Platelet activation signaling and aggregation	1/21	246/8582	0.457451	0.510919	0.431499	Col1a2	1
R-MMU-446203	Asparagine N-linked glycosylation	1/21	256/8582	0.470972	0.512704	0.433006	Cd55	1
R-MMU-9006925	Intracellular signaling by second messengers	1/21	256/8582	0.470972	0.512704	0.433006	Cd86	1
R-MMU-449147	Signaling by Interleukins	1/21	266/8582	0.484172	0.520485	0.439577	Clcf1	1
R-MMU-983168	Antigen processing: Ubiquitination & Proteasome degradation	1/21	285/8582	0.508392	0.539775	0.455868	Lmo7	1
R-MMU-983169	Class I MHC mediated antigen processing & presentation	1/21	342/8582	0.574724	0.602759	0.509062	Lmo7	1
R-MMU-9012999	RHO GTPase cycle	1/21	395/8582	0.62868	0.6485	0.547693	Dlc1	1
R-MMU-9006934	Signaling by Receptor Tyrosine Kinases	1/21	400/8582	0.633419	0.6485	0.547693	Col1a2	1
R-MMU-1280215	Cytokine Signaling in Immune system	1/21	447/8582	0.675238	0.683182	0.576984	Clcf1	1
R-MMU-69278	Cell Cycle Mitotic	1/21	498/8582	0.715464	0.715464	0.604247	Cdkn1c	1

## Sheet: GO_DGE_MOL2_MOL56_Peak
ID	Description	GeneRatio	BgRatio	pvalue	p.adjust	qvalue	geneID	Count	Significant
R-MMU-373080	Class B/2 (Secretin family receptors)	3/20	56/8582	0.000277337	0.0244741	0.0182016	Ramp2/Adm/Ucn2	3	*
R-MMU-449836	Other interleukin signaling	2/20	15/8582	0.000532046	0.0244741	0.0182016	Sdc1/Il34	2	*
R-MMU-1474244	Extracellular matrix organization	4/20	230/8582	0.00173646	0.0376326	0.0279876	Bmp7/Sdc1/Col1a2/Tgfb2	4	*
R-MMU-2129379	Molecules associated with elastic fibres	2/20	32/8582	0.0024543	0.0376326	0.0279876	Bmp7/Tgfb2	2	*
R-MMU-3000171	Non-integrin membrane-ECM interactions	2/20	32/8582	0.0024543	0.0376326	0.0279876	Sdc1/Col1a2	2	*
R-MMU-418597	G alpha (z) signalling events	2/20	32/8582	0.0024543	0.0376326	0.0279876	Rgs16/Rgs17	2	*
R-MMU-1566948	Elastic fibre formation	2/20	39/8582	0.00363096	0.0477212	0.0354906	Bmp7/Tgfb2	2	*

## Sheet: GO_DGE_MOL2_MOL56_Late
ID	Description	GeneRatio	BgRatio	pvalue	p.adjust	qvalue	geneID	Count	Significant
R-MMU-1474228	Degradation of the extracellular matrix	3/21	106/8582	0.00207191	0.132327	0.113866	Scube1/Nid1/Col1a2	3
R-MMU-1474244	Extracellular matrix organization	4/21	230/8582	0.00210043	0.132327	0.113866	Col22a1/Scube1/Nid1/Col1a2	4
R-MMU-8948216	Collagen chain trimerization	2/21	35/8582	0.00323221	0.135753	0.116813	Col22a1/Col1a2	2
R-MMU-421270	Cell-cell junction organization	2/21	48/8582	0.0060115	0.189362	0.162943	Sdk1/Sdk2	2
R-MMU-373080	Class B/2 (Secretin family receptors)	2/21	56/8582	0.00811124	0.194629	0.167475	Cd55/Ramp2	2
R-MMU-1650814	Collagen biosynthesis and modifying enzymes	2/21	60/8582	0.00926804	0.194629	0.167475	Col22a1/Col1a2	2
R-MMU-446728	Cell junction organization	2/21	72/8582	0.01315	0.209516	0.180285	Sdk1/Sdk2	2
R-MMU-1474290	Collagen formation	2/21	73/8582	0.0135006	0.209516	0.180285	Col22a1/Col1a2	2
R-MMU-1500931	Cell-Cell communication	2/21	91/8582	0.0204892	0.209516	0.180285	Sdk1/Sdk2	2
R-MMU-6807878	COPI-mediated anterograde transport	2/21	91/8582	0.0204892	0.209516	0.180285	Cd55/Tubb2b	2
R-MMU-3000157	Laminin interactions	1/21	10/8582	0.0242147	0.209516	0.180285	Nid1	1
R-MMU-75892	Platelet Adhesion to exposed collagen	1/21	10/8582	0.0242147	0.209516	0.180285	Col1a2	1
R-MMU-9840309	Glycosphingolipid biosynthesis	1/21	10/8582	0.0242147	0.209516	0.180285	Esyt3	1
R-MMU-389359	CD28 dependent Vav1 pathway	1/21	11/8582	0.0266052	0.209516	0.180285	Cd86	1
R-MMU-430116	GP1b-IX-V activation signalling	1/21	11/8582	0.0266052	0.209516	0.180285	Col1a2	1
R-MMU-5140745	WNT5A-dependent internalization of FZD2 FZD5 and ROR2	1/21	11/8582	0.0266052	0.209516	0.180285	Ror1	1
R-MMU-419408	Lysosphingolipid and LPA receptors	1/21	14/8582	0.0337433	0.250098	0.215205	Lpar3	1
R-MMU-2243919	Crosslinking of collagen fibrils	1/21	15/8582	0.0361116	0.252781	0.217514	Col1a2	1
R-MMU-190840	Microtubule-dependent trafficking of connexons from Golgi to the plasma membrane	1/21	16/8582	0.0384743	0.255146	0.219549	Tubb2b	1
R-MMU-190872	Transport of connexons to the plasma membrane	1/21	17/8582	0.0408316	0.257239	0.22135	Tubb2b	1
R-MMU-199977	ER to Golgi Anterograde Transport	2/21	143/8582	0.0470869	0.262246	0.225659	Cd55/Tubb2b	2
R-MMU-389513	CTLA4 inhibitory signaling	1/21	20/8582	0.0478703	0.262246	0.225659	Cd86	1
R-MMU-8874081	MET activates PTK2 signaling	1/21	20/8582	0.0478703	0.262246	0.225659	Col1a2	1
R-MMU-389357	CD28 dependent PI3K/Akt signaling	1/21	22/8582	0.0525354	0.275811	0.237331	Cd86	1
R-MMU-9668328	Sealing of the nuclear envelope (NE) by ESCRT-III	1/21	26/8582	0.0618004	0.279929	0.240874	Tubb2b	1
R-MMU-8955332	Carboxyterminal post-translational modifications of tubulin	1/21	27/8582	0.0641032	0.279929	0.240874	Tubb2b	1
R-MMU-948021	Transport to the Golgi and subsequent modification	2/21	171/8582	0.0647219	0.279929	0.240874	Cd55/Tubb2b	2
R-MMU-500792	GPCR ligand binding	3/21	394/8582	0.0691985	0.279929	0.240874	Cd55/Ramp2/Lpar3	3
R-MMU-352230	Amino acid transport across the plasma membrane	1/21	30/8582	0.0709791	0.279929	0.240874	Slc16a10	1
R-MMU-5626467	RHO GTPases activate IQGAPs	1/21	30/8582	0.0709791	0.279929	0.240874	Tubb2b	1
R-MMU-8875878	MET promotes cell motility	1/21	30/8582	0.0709791	0.279929	0.240874	Col1a2	1
R-MMU-190861	Gap junction assembly	1/21	32/8582	0.0755363	0.279929	0.240874	Tubb2b	1
R-MMU-3000171	Non-integrin membrane-ECM interactions	1/21	32/8582	0.0755363	0.279929	0.240874	Col1a2	1
R-MMU-389356	CD28 co-stimulation	1/21	32/8582	0.0755363	0.279929	0.240874	Cd86	1
R-MMU-114604	GPVI-mediated activation cascade	1/21	34/8582	0.0800722	0.280472	0.241342	Col1a2	1
R-MMU-437239	Recycling pathway of L1	1/21	35/8582	0.0823322	0.280472	0.241342	Tubb2b	1
R-MMU-76009	Platelet Aggregation (Plug Formation)	1/21	36/8582	0.0845869	0.280472	0.241342	Col1a2	1
R-MMU-977606	Regulation of Complement cascade	1/21	36/8582	0.0845869	0.280472	0.241342	Cd55	1
R-MMU-9646399	Aggrephagy	1/21	37/8582	0.0868364	0.280548	0.241407	Tubb2b	1
R-MMU-1660662	Glycosphingolipid metabolism	1/21	41/8582	0.0957816	0.287002	0.246961	Esyt3	1
R-MMU-190828	Gap junction trafficking	1/21	41/8582	0.0957816	0.287002	0.246961	Tubb2b	1
R-MMU-3000178	ECM proteoglycans	1/21	42/8582	0.0980048	0.287002	0.246961	Col1a2	1
R-MMU-425407	SLC-mediated transmembrane transport	2/21	218/8582	0.0984002	0.287002	0.246961	Slc13a3/Slc16a10	2
R-MMU-157858	Gap junction trafficking and regulation	1/21	43/8582	0.100223	0.287002	0.246961	Tubb2b	1
R-MMU-2022090	Assembly of collagen fibrils and other multimeric structures	1/21	45/8582	0.104643	0.292664	0.251833	Col1a2	1
R-MMU-166658	Complement cascade	1/21	46/8582	0.106846	0.292664	0.251833	Cd55	1
R-MMU-6811436	COPI-independent Golgi-to-ER retrograde traffic	1/21	48/8582	0.111235	0.294153	0.253115	Tubb2b	1
R-MMU-3371497	HSP90 chaperone cycle for steroid hormone receptors (SHR) in the presence of ligand	1/21	51/8582	0.117781	0.294153	0.253115	Tubb2b	1
R-MMU-983189	Kinesins	1/21	52/8582	0.119953	0.294153	0.253115	Tubb2b	1
R-MMU-8866654	E3 ubiquitin ligases ubiquitinate target proteins	1/21	53/8582	0.122119	0.294153	0.253115	Rnf152	1
R-MMU-9013406	RHOQ GTPase cycle	1/21	53/8582	0.122119	0.294153	0.253115	Dlc1	1
R-MMU-9675108	Nervous system development	2/21	250/8582	0.123656	0.294153	0.253115	Tubb2b/Adgrg6	2
R-MMU-1442490	Collagen degradation	1/21	55/8582	0.126437	0.294153	0.253115	Col1a2	1
R-MMU-446203	Asparagine N-linked glycosylation	2/21	256/8582	0.128563	0.294153	0.253115	Cd55/Tubb2b	2
R-MMU-5620924	Intraflagellar transport	1/21	56/8582	0.128589	0.294153	0.253115	Tubb2b	1
R-MMU-388841	Costimulation by the CD28 family	1/21	57/8582	0.130735	0.294153	0.253115	Cd86	1
R-MMU-373760	L1CAM interactions	1/21	63/8582	0.143508	0.299099	0.25737	Tubb2b	1
R-MMU-2995410	Nuclear Envelope (NE) Reassembly	1/21	64/8582	0.145619	0.299099	0.25737	Tubb2b	1
R-MMU-9833482	PKR-mediated signaling	1/21	64/8582	0.145619	0.299099	0.25737	Tubb2b	1
R-MMU-9663891	Selective autophagy	1/21	65/8582	0.147725	0.299099	0.25737	Tubb2b	1
R-MMU-216083	Integrin cell surface interactions	1/21	66/8582	0.149827	0.299099	0.25737	Col1a2	1
R-MMU-6806834	Signaling by MET	1/21	67/8582	0.151923	0.299099	0.25737	Col1a2	1
R-MMU-9013026	RHOB GTPase cycle	1/21	67/8582	0.151923	0.299099	0.25737	Dlc1	1
R-MMU-9013106	RHOC GTPase cycle	1/21	67/8582	0.151923	0.299099	0.25737	Dlc1	1
R-MMU-425366	Transport of bile salts and organic acids metal ions and amine compounds	1/21	70/8582	0.158183	0.306632	0.263852	Slc13a3	1
R-MMU-8852135	Protein ubiquitination	1/21	73/8582	0.164399	0.313853	0.270065	Rnf152	1
R-MMU-8852276	The role of GTSE1 in G2/M progression after G2 checkpoint	1/21	75/8582	0.168519	0.316916	0.272701	Tubb2b	1
R-MMU-428157	Sphingolipid metabolism	1/21	78/8582	0.174662	0.323638	0.278486	Esyt3	1
R-MMU-163125	Post-translational modification: synthesis of GPI-anchored proteins	1/21	81/8582	0.180762	0.330087	0.284035	Art3	1
R-MMU-9013148	CDC42 GTPase cycle	1/21	84/8582	0.186819	0.336274	0.289358	Dlc1	1
R-MMU-380320	Recruitment of NuMA to mitotic centrosomes	1/21	87/8582	0.192833	0.337321	0.29026	Tubb2b	1
R-MMU-4086400	PCP/CE pathway	1/21	87/8582	0.192833	0.337321	0.29026	Ror1	1
R-MMU-202733	Cell surface interactions at the vascular wall	1/21	89/8582	0.196819	0.337321	0.29026	Col1a2	1
R-MMU-1169410	Antiviral mechanism by IFN-stimulated genes	1/21	91/8582	0.200786	0.337321	0.29026	Tubb2b	1
R-MMU-6811434	COPI-dependent Golgi-to-ER retrograde traffic	1/21	91/8582	0.200786	0.337321	0.29026	Tubb2b	1
R-MMU-198933	Immunoregulatory interactions between a Lymphoid and a non-Lymphoid cell	1/21	95/8582	0.208665	0.341452	0.293814	Col1a2	1
R-MMU-2672351	Stimuli-sensing channels	1/21	95/8582	0.208665	0.341452	0.293814	Slc9b2	1
R-MMU-425393	Transport of inorganic cations/anions and amino acids/oligopeptides	1/21	99/8582	0.21647	0.345255	0.297087	Slc16a10	1
R-MMU-6811558	PI5P PP2A and IER3 Regulate PI3K/AKT Signaling	1/21	99/8582	0.21647	0.345255	0.297087	Cd86	1
R-MMU-2132295	MHC class II antigen presentation	1/21	103/8582	0.224201	0.349083	0.300381	Tubb2b	1
R-MMU-199418	Negative regulation of the PI3K/AKT network	1/21	106/8582	0.229951	0.349083	0.300381	Cd86	1
R-MMU-5610787	Hedgehog 'off' state	1/21	106/8582	0.229951	0.349083	0.300381	Tubb2b	1
R-MMU-9648025	EML4 and NUDC in mitotic spindle formation	1/21	106/8582	0.229951	0.349083	0.300381	Tubb2b	1
R-MMU-2500257	Resolution of Sister Chromatid Cohesion	1/21	117/8582	0.250692	0.373204	0.321136	Tubb2b	1
R-MMU-1632852	Macroautophagy	1/21	120/8582	0.256255	0.373204	0.321136	Tubb2b	1
R-MMU-9612973	Autophagy	1/21	120/8582	0.256255	0.373204	0.321136	Tubb2b	1
R-MMU-983231	Factors involved in megakaryocyte development and platelet production	1/21	122/8582	0.259943	0.373204	0.321136	Tubb2b	1
R-MMU-3858494	Beta-catenin independent WNT signaling	1/21	124/8582	0.263612	0.373204	0.321136	Ror1	1
R-MMU-8856688	Golgi-to-ER retrograde transport	1/21	124/8582	0.263612	0.373204	0.321136	Tubb2b	1
R-MMU-5663220	RHO GTPases Activate Formins	1/21	131/8582	0.27632	0.380901	0.32776	Tubb2b	1
R-MMU-913531	Interferon Signaling	1/21	131/8582	0.27632	0.380901	0.32776	Tubb2b	1
R-MMU-418555	G alpha (s) signalling events	1/21	132/8582	0.278119	0.380901	0.32776	Ramp2	1
R-MMU-8980692	RHOA GTPase cycle	1/21	134/8582	0.281702	0.381661	0.328414	Dlc1	1
R-MMU-5358351	Signaling by Hedgehog	1/21	138/8582	0.288819	0.387141	0.333128	Tubb2b	1
R-MMU-1266738	Developmental Biology	2/21	447/8582	0.299571	0.397325	0.341892	Tubb2b/Adgrg6	2
R-MMU-9013149	RAC1 GTPase cycle	1/21	163/8582	0.331801	0.435489	0.374731	Dlc1	1
R-MMU-109582	Hemostasis	2/21	492/8582	0.340971	0.439383	0.378082	Tubb2b/Col1a2	2
R-MMU-983712	Ion channel transport	1/21	169/8582	0.341742	0.439383	0.378082	Slc9b2	1
R-MMU-69275	G2/M Transition	1/21	175/8582	0.351542	0.446612	0.384303	Tubb2b	1
R-MMU-453274	Mitotic G2-G2/M phases	1/21	177/8582	0.354778	0.446612	0.384303	Tubb2b	1
R-MMU-6811442	Intra-Golgi and retrograde Golgi-to-ER traffic	1/21	179/8582	0.357998	0.446612	0.384303	Tubb2b	1
R-MMU-2467813	Separation of Sister Chromatids	1/21	182/8582	0.3628	0.448165	0.385639	Tubb2b	1
R-MMU-5617833	Cilium Assembly	1/21	185/8582	0.367568	0.44915	0.386487	Tubb2b	1
R-MMU-68877	Mitotic Prometaphase	1/21	187/8582	0.370727	0.44915	0.386487	Tubb2b	1
R-MMU-416476	G alpha (q) signalling events	1/21	200/8582	0.390901	0.469081	0.403637	Lpar3	1
R-MMU-1852241	Organelle biogenesis and maintenance	1/21	212/8582	0.408974	0.486139	0.418315	Tubb2b	1
R-MMU-68882	Mitotic Anaphase	1/21	218/8582	0.417819	0.486358	0.418504	Tubb2b	1
R-MMU-2555396	Mitotic Metaphase and Anaphase	1/21	219/8582	0.41928	0.486358	0.418504	Tubb2b	1
R-MMU-8951664	Neddylation	1/21	220/8582	0.420738	0.486358	0.418504	Lmo7	1
R-MMU-195721	Signaling by WNT	1/21	229/8582	0.433706	0.493932	0.42502	Ror1	1
R-MMU-1257604	PIP3 activates AKT signaling	1/21	230/8582	0.43513	0.493932	0.42502	Cd86	1
R-MMU-195258	RHO GTPase Effectors	1/21	238/8582	0.446398	0.502197	0.432133	Tubb2b	1
R-MMU-76002	Platelet activation signaling and aggregation	1/21	246/8582	0.457451	0.510078	0.438914	Col1a2	1
R-MMU-422475	Axon guidance	1/21	249/8582	0.461541	0.510125	0.438955	Tubb2b	1
R-MMU-9006925	Intracellular signaling by second messengers	1/21	256/8582	0.470972	0.516022	0.444029	Cd86	1
R-MMU-418594	G alpha (i) signalling events	1/21	274/8582	0.494505	0.537135	0.462197	Lpar3	1
R-MMU-983168	Antigen processing: Ubiquitination & Proteasome degradation	1/21	285/8582	0.508392	0.5475	0.471115	Lmo7	1
R-MMU-373076	Class A/1 (Rhodopsin-like receptors)	1/21	307/8582	0.535084	0.571361	0.491647	Lpar3	1
R-MMU-983169	Class I MHC mediated antigen processing & presentation	1/21	342/8582	0.574724	0.608531	0.523632	Lmo7	1
R-MMU-68886	M Phase	1/21	382/8582	0.616084	0.646888	0.556637	Tubb2b	1
R-MMU-9012999	RHO GTPase cycle	1/21	395/8582	0.62868	0.654187	0.562918	Dlc1	1
R-MMU-9006934	Signaling by Receptor Tyrosine Kinases	1/21	400/8582	0.633419	0.654187	0.562918	Col1a2	1
R-MMU-2262752	Cellular responses to stress	1/21	440/8582	0.669311	0.68064	0.58568	Tubb2b	1
R-MMU-8953897	Cellular responses to stimuli	1/21	443/8582	0.671864	0.68064	0.58568	Tubb2b	1
R-MMU-1280215	Cytokine Signaling in Immune system	1/21	447/8582	0.675238	0.68064	0.58568	Tubb2b	1
R-MMU-69278	Cell Cycle Mitotic	1/21	498/8582	0.715464	0.715464	0.615645	Tubb2b	1

## Sheet: GO_DGE_MOL56_MOL2
ID	Description	GeneRatio	BgRatio	pvalue	p.adjust	qvalue	geneID	Count	Significant
R-MMU-73621	Pyrimidine catabolism	2/38	11/8582	0.00102396	0.146065	0.131924	Dpyd/Nt5e	2
R-MMU-422356	Regulation of insulin secretion	3/38	61/8582	0.00241501	0.146065	0.131924	Kcnb1/Plcb1/Rapgef3	3
R-MMU-112316	Neuronal System	6/38	323/8582	0.00270491	0.146065	0.131924	Kcna2/Kcnb1/Nlgn1/Nlgn3/Plcb1/Snap25	6
R-MMU-163685	Integration of energy metabolism	3/38	77/8582	0.00467544	0.181437	0.163871	Kcnb1/Plcb1/Rapgef3	3
R-MMU-9013149	RAC1 GTPase cycle	4/38	163/8582	0.0055999	0.181437	0.163871	Arhgap20/Farp1/Vangl1/Wasf3	4
R-MMU-6794361	Neurexins and neuroligins	2/38	31/8582	0.00818775	0.20156	0.182045	Nlgn1/Nlgn3	2
R-MMU-381676	Glucagon-like Peptide-1 (GLP1) regulates insulin secretion	2/38	32/8582	0.00870936	0.20156	0.182045	Kcnb1/Rapgef3	2
R-MMU-8956319	Nucleotide catabolism	2/38	35/8582	0.010361	0.207597	0.187498	Dpyd/Nt5e	2
R-MMU-9035034	RHOF GTPase cycle	2/38	37/8582	0.0115332	0.207597	0.187498	Farp1/Vangl1	2
R-MMU-1296072	Voltage gated Potassium channels	2/38	40/8582	0.0133954	0.217005	0.195996	Kcna2/Kcnb1	2
R-MMU-8980692	RHOA GTPase cycle	3/38	134/8582	0.0210901	0.303631	0.274235	Arhgap20/Farp1/Vangl1	3
R-MMU-2142753	Arachidonic acid metabolism	2/38	53/8582	0.0228288	0.303631	0.274235	Cyp2j6/Ptgds	2
R-MMU-9006934	Signaling by Receptor Tyrosine Kinases	5/38	400/8582	0.0303558	0.303631	0.274235	Erbb4/Ntrk2/Pdgfc/Sh3gl2/Wasf3	5
R-MMU-6794362	Protein-protein interactions at synapses	2/38	66/8582	0.0342841	0.303631	0.274235	Nlgn1/Nlgn3	2
R-MMU-166520	Signaling by NTRKs	2/38	74/8582	0.0422317	0.303631	0.274235	Ntrk2/Sh3gl2	2
R-MMU-177504	Retrograde neurotrophin signalling	1/38	10/8582	0.0434291	0.303631	0.274235	Sh3gl2	1
R-MMU-198693	AKT phosphorylates targets in the nucleus	1/38	10/8582	0.0434291	0.303631	0.274235	Nr4a1	1
R-MMU-1250347	SHC1 events in ERBB4 signaling	1/38	11/8582	0.0476696	0.303631	0.274235	Erbb4	1
R-MMU-1251985	Nuclear signaling by ERBB4	1/38	11/8582	0.0476696	0.303631	0.274235	Erbb4	1
R-MMU-1963640	GRB2 events in ERBB2 signaling	1/38	11/8582	0.0476696	0.303631	0.274235	Erbb4	1
R-MMU-211935	Fatty acids	1/38	11/8582	0.0476696	0.303631	0.274235	Cyp2j6	1
R-MMU-400451	Free fatty acids regulate insulin secretion	1/38	11/8582	0.0476696	0.303631	0.274235	Plcb1	1
R-MMU-8847993	ERBB2 Activates PTK6 Signaling	1/38	11/8582	0.0476696	0.303631	0.274235	Erbb4	1
R-MMU-2162123	Synthesis of Prostaglandins (PG) and Thromboxanes (TX)	1/38	12/8582	0.0518918	0.303631	0.274235	Ptgds	1
R-MMU-9013148	CDC42 GTPase cycle	2/38	84/8582	0.0530314	0.303631	0.274235	Arhgap20/Farp1	2
R-MMU-6785631	ERBB2 Regulates Cell Motility	1/38	13/8582	0.0560958	0.303631	0.274235	Erbb4	1
R-MMU-1963642	PI3K events in ERBB2 signaling	1/38	14/8582	0.0602816	0.303631	0.274235	Erbb4	1
R-MMU-392517	Rap1 signalling	1/38	14/8582	0.0602816	0.303631	0.274235	Rapgef3	1
R-MMU-419408	Lysosphingolipid and LPA receptors	1/38	14/8582	0.0602816	0.303631	0.274235	Plppr5	1
R-MMU-1250196	SHC1 events in ERBB2 signaling	1/38	15/8582	0.0644494	0.303631	0.274235	Erbb4	1
R-MMU-264642	Acetylcholine Neurotransmitter Release Cycle	1/38	15/8582	0.0644494	0.303631	0.274235	Snap25	1
R-MMU-449836	Other interleukin signaling	1/38	15/8582	0.0644494	0.303631	0.274235	Snap25	1
R-MMU-9037629	Lewis blood group biosynthesis	1/38	15/8582	0.0644494	0.303631	0.274235	Fut9	1
R-MMU-15869	Metabolism of nucleotides	2/38	94/8582	0.0647013	0.303631	0.274235	Dpyd/Nt5e	2
R-MMU-1296071	Potassium Channels	2/38	97/8582	0.0683582	0.303631	0.274235	Kcna2/Kcnb1	2
R-MMU-6788467	IL-6-type cytokine receptor ligand interactions	1/38	16/8582	0.0685991	0.303631	0.274235	Cntfr	1
R-MMU-9033658	Blood group systems biosynthesis	1/38	17/8582	0.072731	0.303631	0.274235	Fut9	1
R-MMU-181429	Serotonin Neurotransmitter Release Cycle	1/38	18/8582	0.076845	0.303631	0.274235	Snap25	1
R-MMU-181430	Norepinephrine Neurotransmitter Release Cycle	1/38	18/8582	0.076845	0.303631	0.274235	Snap25	1
R-MMU-74259	Purine catabolism	1/38	18/8582	0.076845	0.303631	0.274235	Nt5e	1
R-MMU-888590	GABA synthesis release reuptake and degradation	1/38	18/8582	0.076845	0.303631	0.274235	Snap25	1
R-MMU-373752	Netrin-1 signaling	1/38	19/8582	0.0809412	0.312202	0.281975	Dscam	1
R-MMU-418217	G beta:gamma signalling through PLC beta	1/38	20/8582	0.0850197	0.313027	0.282721	Plcb1	1
R-MMU-6807004	Negative regulation of MET activity	1/38	20/8582	0.0850197	0.313027	0.282721	Sh3gl2	1
R-MMU-500657	Presynaptic function of Kainate receptors	1/38	21/8582	0.0890805	0.314765	0.284291	Plcb1	1
R-MMU-6783589	Interleukin-6 family signaling	1/38	22/8582	0.0931239	0.314765	0.284291	Cntfr	1
R-MMU-76002	Platelet activation signaling and aggregation	3/38	246/8582	0.0943375	0.314765	0.284291	Lhfpl2/Rapgef3/Timp3	3
R-MMU-114608	Platelet degranulation	2/38	117/8582	0.0943571	0.314765	0.284291	Lhfpl2/Timp3	2
R-MMU-9012999	RHO GTPase cycle	4/38	395/8582	0.0955783	0.314765	0.284291	Arhgap20/Farp1/Vangl1/Wasf3	4
R-MMU-212676	Dopamine Neurotransmitter Release Cycle	1/38	23/8582	0.0971497	0.314765	0.284291	Snap25	1
R-MMU-210500	Glutamate Neurotransmitter Release Cycle	1/38	24/8582	0.101158	0.315432	0.284893	Snap25	1
R-MMU-76005	Response to elevated platelet cytosolic Ca2+	2/38	122/8582	0.10125	0.315432	0.284893	Lhfpl2/Timp3	2
R-MMU-3858494	Beta-catenin independent WNT signaling	2/38	124/8582	0.104046	0.318028	0.287237	Plcb1/Prickle1	2
R-MMU-211981	Xenobiotics	1/38	26/8582	0.109123	0.321385	0.29027	Cyp2j6	1
R-MMU-1855204	Synthesis of IP3 and IP4 in the cytosol	1/38	27/8582	0.11308	0.321385	0.29027	Plcb1	1
R-MMU-354192	Integrin signaling	1/38	27/8582	0.11308	0.321385	0.29027	Rapgef3	1
R-MMU-8863795	Downregulation of ERBB2 signaling	1/38	27/8582	0.11308	0.321385	0.29027	Erbb4	1
R-MMU-196807	Nicotinate metabolism	1/38	30/8582	0.124847	0.325103	0.293628	Nt5e	1
R-MMU-451326	Activation of kainate receptors upon glutamate binding	1/38	30/8582	0.124847	0.325103	0.293628	Plcb1	1
R-MMU-182971	EGFR downregulation	1/38	31/8582	0.128736	0.325103	0.293628	Sh3gl2	1
R-MMU-397795	G-protein beta:gamma signalling	1/38	31/8582	0.128736	0.325103	0.293628	Plcb1	1
R-MMU-420499	Class C/3 (Metabotropic glutamate/pheromone receptors)	1/38	31/8582	0.128736	0.325103	0.293628	Grm7	1
R-MMU-9013407	RHOH GTPase cycle	1/38	31/8582	0.128736	0.325103	0.293628	Vangl1	1
R-MMU-5663213	RHO GTPases Activate WASPs and WAVEs	1/38	32/8582	0.132608	0.325103	0.293628	Wasf3	1
R-MMU-1236394	Signaling by ERBB4	1/38	33/8582	0.136463	0.325103	0.293628	Erbb4	1
R-MMU-432720	Lysosome Vesicle Biogenesis	1/38	33/8582	0.136463	0.325103	0.293628	Sh3gl2	1
R-MMU-5173214	O-glycosylation of TSR domain-containing proteins	1/38	33/8582	0.136463	0.325103	0.293628	Adamts6	1
R-MMU-9013424	RHOV GTPase cycle	1/38	33/8582	0.136463	0.325103	0.293628	Vangl1	1
R-MMU-192105	Synthesis of bile acids and bile salts	1/38	34/8582	0.140301	0.32828	0.296497	Osbpl6	1
R-MMU-112043	PLC beta mediated events	1/38	35/8582	0.144123	0.32828	0.296497	Plcb1	1
R-MMU-437239	Recycling pathway of L1	1/38	35/8582	0.144123	0.32828	0.296497	Sh3gl2	1
R-MMU-76009	Platelet Aggregation (Plug Formation)	1/38	36/8582	0.147928	0.32828	0.296497	Rapgef3	1
R-MMU-9013420	RHOU GTPase cycle	1/38	36/8582	0.147928	0.32828	0.296497	Vangl1	1
R-MMU-8978868	Fatty acid metabolism	2/38	163/8582	0.162209	0.342904	0.309706	Cyp2j6/Ptgds	2
R-MMU-112040	G-protein mediated events	1/38	40/8582	0.162985	0.342904	0.309706	Plcb1	1
R-MMU-418990	Adherens junctions interactions	1/38	40/8582	0.162985	0.342904	0.309706	Cdh6	1
R-MMU-9696264	RND3 GTPase cycle	1/38	40/8582	0.162985	0.342904	0.309706	Vangl1	1
R-MMU-9696273	RND1 GTPase cycle	1/38	41/8582	0.166709	0.346186	0.31267	Vangl1	1
R-MMU-9696270	RND2 GTPase cycle	1/38	42/8582	0.170416	0.346186	0.31267	Vangl1	1
R-MMU-109582	Hemostasis	4/38	492/8582	0.171189	0.346186	0.31267	Kif21b/Lhfpl2/Rapgef3/Timp3	4
R-MMU-194068	Bile acid and bile salt metabolism	1/38	44/8582	0.177783	0.346186	0.31267	Osbpl6	1
R-MMU-4086398	Ca2+ pathway	1/38	44/8582	0.177783	0.346186	0.31267	Plcb1	1
R-MMU-1227986	Signaling by ERBB2	1/38	46/8582	0.185086	0.346186	0.31267	Erbb4	1
R-MMU-1483249	Inositol phosphate metabolism	1/38	46/8582	0.185086	0.346186	0.31267	Plcb1	1
R-MMU-177929	Signaling by EGFR	1/38	46/8582	0.185086	0.346186	0.31267	Sh3gl2	1
R-MMU-8848021	Signaling by PTK6	1/38	47/8582	0.188714	0.346186	0.31267	Erbb4	1
R-MMU-9006927	Signaling by Non-Receptor Tyrosine Kinases	1/38	47/8582	0.188714	0.346186	0.31267	Erbb4	1
R-MMU-112310	Neurotransmitter release cycle	1/38	48/8582	0.192326	0.346186	0.31267	Snap25	1
R-MMU-421270	Cell-cell junction organization	1/38	48/8582	0.192326	0.346186	0.31267	Cdh6	1
R-MMU-9013405	RHOD GTPase cycle	1/38	48/8582	0.192326	0.346186	0.31267	Vangl1	1
R-MMU-383280	Nuclear Receptor transcription pathway	1/38	49/8582	0.195922	0.348785	0.315017	Nr4a1	1
R-MMU-186797	Signaling by PDGF	1/38	50/8582	0.199503	0.351299	0.317287	Pdgfc	1
R-MMU-432722	Golgi Associated Vesicle Biogenesis	1/38	52/8582	0.206618	0.356087	0.321612	Sh3gl2	1
R-MMU-983189	Kinesins	1/38	52/8582	0.206618	0.356087	0.321612	Kif21b	1
R-MMU-9013406	RHOQ GTPase cycle	1/38	53/8582	0.210153	0.358365	0.32367	Vangl1	1
R-MMU-2029482	Regulation of actin dynamics for phagocytic cup formation	1/38	55/8582	0.217175	0.366483	0.331002	Wasf3	1
R-MMU-112315	Transmission across Chemical Synapses	2/38	201/8582	0.223253	0.372855	0.336757	Plcb1/Snap25	2
R-MMU-187037	Signaling by NTRK1 (TRKA)	1/38	62/8582	0.24128	0.388623	0.350998	Sh3gl2	1
R-MMU-4608870	Asymmetric localization of PCP proteins	1/38	62/8582	0.24128	0.388623	0.350998	Prickle1	1
R-MMU-373760	L1CAM interactions	1/38	63/8582	0.244664	0.388623	0.350998	Sh3gl2	1
R-MMU-211897	Cytochrome P450 - arranged by substrate type	1/38	65/8582	0.251388	0.388623	0.350998	Cyp2j6	1
R-MMU-500792	GPCR ligand binding	3/38	394/8582	0.252736	0.388623	0.350998	Ece1/Grm7/Plppr5	3
R-MMU-1234176	Oxygen-dependent proline hydroxylation of Hypoxia-inducible Factor Alpha	1/38	66/8582	0.254728	0.388623	0.350998	Epas1	1
R-MMU-5658442	Regulation of RAS by GAPs	1/38	67/8582	0.258053	0.388623	0.350998	Rasal1	1
R-MMU-6806834	Signaling by MET	1/38	67/8582	0.258053	0.388623	0.350998	Sh3gl2	1
R-MMU-9013026	RHOB GTPase cycle	1/38	67/8582	0.258053	0.388623	0.350998	Vangl1	1
R-MMU-9013106	RHOC GTPase cycle	1/38	67/8582	0.258053	0.388623	0.350998	Vangl1	1
R-MMU-199992	trans-Golgi Network Vesicle Budding	1/38	68/8582	0.261364	0.388623	0.350998	Sh3gl2	1
R-MMU-9013408	RHOG GTPase cycle	1/38	69/8582	0.264661	0.388623	0.350998	Vangl1	1
R-MMU-111885	Opioid Signalling	1/38	70/8582	0.267944	0.388623	0.350998	Plcb1	1
R-MMU-1234174	Cellular response to hypoxia	1/38	70/8582	0.267944	0.388623	0.350998	Epas1	1
R-MMU-195721	Signaling by WNT	2/38	229/8582	0.269422	0.388623	0.350998	Plcb1/Prickle1	2
R-MMU-1257604	PIP3 activates AKT signaling	2/38	230/8582	0.271077	0.388623	0.350998	Erbb4/Nr4a1	2
R-MMU-446728	Cell junction organization	1/38	72/8582	0.274466	0.39003	0.352269	Cdh6	1
R-MMU-2029480	Fcgamma receptor (FCGR) dependent phagocytosis	1/38	75/8582	0.284143	0.400271	0.361518	Wasf3	1
R-MMU-422475	Axon guidance	2/38	249/8582	0.302494	0.417553	0.377127	Dscam/Sh3gl2	2
R-MMU-9013404	RAC2 GTPase cycle	1/38	81/8582	0.303121	0.417553	0.377127	Vangl1	1
R-MMU-9675108	Nervous system development	2/38	250/8582	0.304144	0.417553	0.377127	Dscam/Sh3gl2	2
R-MMU-9006925	Intracellular signaling by second messengers	2/38	256/8582	0.314033	0.425704	0.384489	Erbb4/Nr4a1	2
R-MMU-9013423	RAC3 GTPase cycle	1/38	86/8582	0.318562	0.425704	0.384489	Vangl1	1
R-MMU-4086400	PCP/CE pathway	1/38	87/8582	0.321609	0.425704	0.384489	Prickle1	1
R-MMU-5673001	RAF/MAP kinase cascade	2/38	262/8582	0.323897	0.425704	0.384489	Erbb4/Rasal1	2
R-MMU-9018519	Estrogen-dependent gene expression	1/38	89/8582	0.327665	0.425704	0.384489	Erbb4	1
R-MMU-449147	Signaling by Interleukins	2/38	266/8582	0.330457	0.425704	0.384489	Cntfr/Snap25	2
R-MMU-1500931	Cell-Cell communication	1/38	91/8582	0.333669	0.425704	0.384489	Cdh6	1
R-MMU-6811434	COPI-dependent Golgi-to-ER retrograde traffic	1/38	91/8582	0.333669	0.425704	0.384489	Kif21b	1
R-MMU-5684996	MAPK1/MAPK3 signaling	2/38	268/8582	0.333731	0.425704	0.384489	Erbb4/Rasal1	2
R-MMU-4420097	VEGFA-VEGFR2 Pathway	1/38	92/8582	0.336651	0.426074	0.384823	Wasf3	1
R-MMU-418594	G alpha (i) signalling events	2/38	274/8582	0.34353	0.43057	0.388884	Grm7/Plcb1	2
R-MMU-2672351	Stimuli-sensing channels	1/38	95/8582	0.345519	0.43057	0.388884	Ttyh1	1
R-MMU-5173105	O-linked glycosylation	1/38	97/8582	0.351367	0.431223	0.389474	Adamts6	1
R-MMU-8856825	Cargo recognition for clathrin-mediated endocytosis	1/38	97/8582	0.351367	0.431223	0.389474	Sh3gl2	1
R-MMU-382556	ABC-family proteins mediated transport	1/38	99/8582	0.357164	0.431796	0.389991	Abca8b	1
R-MMU-6811558	PI5P PP2A and IER3 Regulate PI3K/AKT Signaling	1/38	99/8582	0.357164	0.431796	0.389991	Erbb4	1
R-MMU-194138	Signaling by VEGF	1/38	100/8582	0.360044	0.432053	0.390223	Wasf3	1
R-MMU-211945	Phase I - Functionalization of compounds	1/38	101/8582	0.362911	0.432291	0.390438	Cyp2j6	1
R-MMU-2132295	MHC class II antigen presentation	1/38	103/8582	0.368608	0.435591	0.393419	Sh3gl2	1
R-MMU-5683057	MAPK family signaling cascades	2/38	291/8582	0.371059	0.435591	0.393419	Erbb4/Rasal1	2
R-MMU-199418	Negative regulation of the PI3K/AKT network	1/38	106/8582	0.37706	0.439451	0.396905	Erbb4	1
R-MMU-196849	Metabolism of water-soluble vitamins and cofactors	1/38	110/8582	0.388158	0.449154	0.405669	Nt5e	1
R-MMU-373076	Class A/1 (Rhodopsin-like receptors)	2/38	307/8582	0.396586	0.455652	0.411537	Ece1/Plppr5	2
R-MMU-983231	Factors involved in megakaryocyte development and platelet production	1/38	122/8582	0.42031	0.479508	0.433084	Kif21b	1
R-MMU-8856688	Golgi-to-ER retrograde transport	1/38	124/8582	0.425506	0.482042	0.435373	Kif21b	1
R-MMU-8957322	Metabolism of steroids	1/38	126/8582	0.430657	0.484489	0.437583	Osbpl6	1
R-MMU-8856828	Clathrin-mediated endocytosis	1/38	133/8582	0.448333	0.500897	0.452402	Sh3gl2	1
R-MMU-112314	Neurotransmitter receptors and postsynaptic signal transmission	1/38	138/8582	0.460631	0.511111	0.461627	Plcb1	1
R-MMU-8939211	ESR-mediated signaling	1/38	159/8582	0.509429	0.561412	0.507058	Erbb4	1
R-MMU-196854	Metabolism of vitamins and cofactors	1/38	169/8582	0.531129	0.577469	0.521561	Nt5e	1
R-MMU-983712	Ion channel transport	1/38	169/8582	0.531129	0.577469	0.521561	Ttyh1	1
R-MMU-6811442	Intra-Golgi and retrograde Golgi-to-ER traffic	1/38	179/8582	0.551892	0.596044	0.538337	Kif21b	1
R-MMU-375276	Peptide ligand-binding receptors	1/38	186/8582	0.565891	0.607115	0.548337	Ece1	1
R-MMU-416476	G alpha (q) signalling events	1/38	200/8582	0.592623	0.623013	0.562695	Plcb1	1
R-MMU-211859	Biological oxidations	1/38	201/8582	0.59447	0.623013	0.562695	Cyp2j6	1
R-MMU-1266738	Developmental Biology	2/38	447/8582	0.596092	0.623013	0.562695	Dscam/Sh3gl2	2
R-MMU-1280215	Cytokine Signaling in Immune system	2/38	447/8582	0.596092	0.623013	0.562695	Cntfr/Snap25	2
R-MMU-9006931	Signaling by Nuclear Receptors	1/38	209/8582	0.608954	0.632376	0.571152	Erbb4	1
R-MMU-8951664	Neddylation	1/38	220/8582	0.62805	0.648052	0.58531	Epas1	1
R-MMU-195258	RHO GTPase Effectors	1/38	238/8582	0.657357	0.673999	0.608745	Wasf3	1
R-MMU-71291	Metabolism of amino acids and derivatives	1/38	249/8582	0.674146	0.686866	0.620366	Dct	1
R-MMU-71387	Metabolism of carbohydrates	1/38	263/8582	0.694359	0.703039	0.634973	Fut9	1
R-MMU-2262752	Cellular responses to stress	1/38	440/8582	0.865262	0.86714	0.783187	Epas1	1
R-MMU-8953897	Cellular responses to stimuli	1/38	443/8582	0.86714	0.86714	0.783187	Epas1	1

## Sheet: GO_DGE_MOL56_MOL2_Ctrl
ID	Description	GeneRatio	BgRatio	pvalue	p.adjust	qvalue	geneID	Count	Significant
R-MMU-112316	Neuronal System	5/23	323/8582	0.00140764	0.115427	0.0948308	Kcnj3/Kcnh8/Cacna2d3/Nrxn1/Grik3	5
R-MMU-112315	Transmission across Chemical Synapses	3/23	201/8582	0.0158721	0.200954	0.165097	Kcnj3/Cacna2d3/Grik3	3
R-MMU-9006934	Signaling by Receptor Tyrosine Kinases	4/23	400/8582	0.0203625	0.200954	0.165097	Kit/Thbs2/Pde3b/Pcsk5	4
R-MMU-1500931	Cell-Cell communication	2/23	91/8582	0.0243497	0.200954	0.165097	Kirrel3/Cdh13	2
R-MMU-112308	Presynaptic depolarization and calcium channel opening	1/23	10/8582	0.0264931	0.200954	0.165097	Cacna2d3	1
R-MMU-2022923	Dermatan sulfate biosynthesis	1/23	10/8582	0.0264931	0.200954	0.165097	Ust	1
R-MMU-451306	Ionotropic activity of kainate receptors	1/23	10/8582	0.0264931	0.200954	0.165097	Grik3	1
R-MMU-451308	Activation of Ca-permeable Kainate Receptor	1/23	10/8582	0.0264931	0.200954	0.165097	Grik3	1
R-MMU-1296071	Potassium Channels	2/23	97/8582	0.0274186	0.200954	0.165097	Kcnj3/Kcnh8	2
R-MMU-74182	Ketone body metabolism	1/23	11/8582	0.0291052	0.200954	0.165097	Hmgcll1	1
R-MMU-8963889	Assembly of active LPL and LIPC lipase complexes	1/23	11/8582	0.0291052	0.200954	0.165097	Pcsk5	1
R-MMU-5673001	RAF/MAP kinase cascade	3/23	262/8582	0.0317294	0.200954	0.165097	Kit/Angpt1/Gfra1	3
R-MMU-5684996	MAPK1/MAPK3 signaling	3/23	268/8582	0.0336168	0.200954	0.165097	Kit/Angpt1/Gfra1	3
R-MMU-5635838	Activation of SMO	1/23	13/8582	0.0343092	0.200954	0.165097	Gas1	1
R-MMU-1433559	Regulation of KIT signaling	1/23	14/8582	0.0369012	0.201727	0.165732	Kit	1
R-MMU-5683057	MAPK family signaling cascades	3/23	291/8582	0.0413913	0.203348	0.167064	Kit/Angpt1/Gfra1	3
R-MMU-210993	Tie2 Signaling	1/23	17/8582	0.0446374	0.203348	0.167064	Angpt1	1
R-MMU-3928664	Ephrin signaling	1/23	17/8582	0.0446374	0.203348	0.167064	Ephb2	1
R-MMU-112314	Neurotransmitter receptors and postsynaptic signal transmission	2/23	138/8582	0.0521125	0.21141	0.173688	Kcnj3/Grik3	2
R-MMU-500657	Presynaptic function of Kainate receptors	1/23	21/8582	0.0548598	0.21141	0.173688	Grik3	1
R-MMU-1296041	Activation of G protein gated Potassium channels	1/23	28/8582	0.0724978	0.21141	0.173688	Kcnj3	1
R-MMU-1296059	G protein gated Potassium channels	1/23	28/8582	0.0724978	0.21141	0.173688	Kcnj3	1
R-MMU-8963899	Plasma lipoprotein remodeling	1/23	28/8582	0.0724978	0.21141	0.173688	Pcsk5	1
R-MMU-997272	Inhibition of voltage gated Ca2+ channels via Gbeta/gamma subunits	1/23	28/8582	0.0724978	0.21141	0.173688	Kcnj3	1
R-MMU-451326	Activation of kainate receptors upon glutamate binding	1/23	30/8582	0.0774791	0.21141	0.173688	Grik3	1
R-MMU-6794361	Neurexins and neuroligins	1/23	31/8582	0.0799602	0.21141	0.173688	Nrxn1	1
R-MMU-2129379	Molecules associated with elastic fibres	1/23	32/8582	0.0824349	0.21141	0.173688	Fbn2	1
R-MMU-3928665	EPH-ephrin mediated repulsion of cells	1/23	33/8582	0.0849032	0.21141	0.173688	Ephb2	1
R-MMU-5173214	O-glycosylation of TSR domain-containing proteins	1/23	33/8582	0.0849032	0.21141	0.173688	Thbs2	1
R-MMU-1296065	Inwardly rectifying K+ channels	1/23	34/8582	0.0873651	0.21141	0.173688	Kcnj3	1
R-MMU-3928662	EPHB-mediated forward signaling	1/23	36/8582	0.09227	0.21141	0.173688	Ephb2	1
R-MMU-1433557	Signaling by SCF-KIT	1/23	38/8582	0.0971497	0.21141	0.173688	Kit	1
R-MMU-8853659	RET signaling	1/23	38/8582	0.0971497	0.21141	0.173688	Gfra1	1
R-MMU-1566948	Elastic fibre formation	1/23	39/8582	0.0995801	0.21141	0.173688	Fbn2	1
R-MMU-1296072	Voltage gated Potassium channels	1/23	40/8582	0.102004	0.21141	0.173688	Kcnh8	1
R-MMU-418990	Adherens junctions interactions	1/23	40/8582	0.102004	0.21141	0.173688	Cdh13	1
R-MMU-9696264	RND3 GTPase cycle	1/23	40/8582	0.102004	0.21141	0.173688	Sema4f	1
R-MMU-109704	PI3K Cascade	1/23	41/8582	0.104422	0.21141	0.173688	Pde3b	1
R-MMU-977444	GABA B receptor activation	1/23	41/8582	0.104422	0.21141	0.173688	Kcnj3	1
R-MMU-991365	Activation of GABAB receptors	1/23	41/8582	0.104422	0.21141	0.173688	Kcnj3	1
R-MMU-112399	IRS-mediated signalling	1/23	42/8582	0.106834	0.21141	0.173688	Pde3b	1
R-MMU-1793185	Chondroitin sulfate/dermatan sulfate metabolism	1/23	46/8582	0.116419	0.21141	0.173688	Ust	1
R-MMU-2428928	IRS-related events triggered by IGF1R	1/23	46/8582	0.116419	0.21141	0.173688	Pde3b	1
R-MMU-2428924	IGF1R signaling cascade	1/23	47/8582	0.1188	0.21141	0.173688	Pde3b	1
R-MMU-2404192	Signaling by Type 1 Insulin-like Growth Factor 1 Receptor (IGF1R)	1/23	48/8582	0.121174	0.21141	0.173688	Pde3b	1
R-MMU-421270	Cell-cell junction organization	1/23	48/8582	0.121174	0.21141	0.173688	Cdh13	1
R-MMU-74751	Insulin receptor signalling cascade	1/23	48/8582	0.121174	0.21141	0.173688	Pde3b	1
R-MMU-186797	Signaling by PDGF	1/23	50/8582	0.125905	0.215088	0.176709	Thbs2	1
R-MMU-977443	GABA receptor activation	1/23	57/8582	0.142272	0.230823	0.189636	Kcnj3	1
R-MMU-422475	Axon guidance	2/23	249/8582	0.142637	0.230823	0.189636	Ephb2/Gfra1	2
R-MMU-9675108	Nervous system development	2/23	250/8582	0.14356	0.230823	0.189636	Ephb2/Gfra1	2
R-MMU-2682334	EPH-Ephrin signaling	1/23	63/8582	0.156068	0.244988	0.201274	Ephb2	1
R-MMU-174824	Plasma lipoprotein assembly remodeling and clearance	1/23	64/8582	0.158346	0.244988	0.201274	Pcsk5	1
R-MMU-6794362	Protein-protein interactions at synapses	1/23	66/8582	0.162885	0.246218	0.202285	Nrxn1	1
R-MMU-9013026	RHOB GTPase cycle	1/23	67/8582	0.165146	0.246218	0.202285	Pcdh7	1
R-MMU-425366	Transport of bile salts and organic acids metal ions and amine compounds	1/23	70/8582	0.171894	0.251702	0.20679	Slc13a1	1
R-MMU-446728	Cell junction organization	1/23	72/8582	0.176363	0.253716	0.208444	Cdh13	1
R-MMU-166520	Signaling by NTRKs	1/23	74/8582	0.18081	0.254373	0.208984	Pcsk5	1
R-MMU-74752	Signaling by Insulin receptor	1/23	75/8582	0.183024	0.254373	0.208984	Pde3b	1
R-MMU-5632684	Hedgehog 'on' state	1/23	81/8582	0.196192	0.268129	0.220286	Gas1	1
R-MMU-8876198	RAB GEFs exchange GTP for GDP on RABs	1/23	87/8582	0.209156	0.281161	0.230992	Dennd1b	1
R-MMU-202733	Cell surface interactions at the vascular wall	1/23	89/8582	0.213433	0.282282	0.231914	Angpt1	1
R-MMU-5173105	O-linked glycosylation	1/23	97/8582	0.23032	0.299782	0.246291	Thbs2	1
R-MMU-6811558	PI5P PP2A and IER3 Regulate PI3K/AKT Signaling	1/23	99/8582	0.234487	0.300437	0.246829	Kit	1
R-MMU-1474228	Degradation of the extracellular matrix	1/23	106/8582	0.248904	0.309244	0.254064	Fbn2	1
R-MMU-199418	Negative regulation of the PI3K/AKT network	1/23	106/8582	0.248904	0.309244	0.254064	Kit	1
R-MMU-9007101	Rab regulation of trafficking	1/23	111/8582	0.259042	0.317036	0.260466	Dennd1b	1
R-MMU-114608	Platelet degranulation	1/23	117/8582	0.271034	0.3268	0.268488	Pcdh7	1
R-MMU-1630316	Glycosaminoglycan metabolism	1/23	119/8582	0.27499	0.3268	0.268488	Ust	1
R-MMU-76005	Response to elevated platelet cytosolic Ca2+	1/23	122/8582	0.280886	0.329038	0.270327	Pcdh7	1
R-MMU-9012999	RHO GTPase cycle	2/23	395/8582	0.286246	0.330594	0.271605	Pcdh7/Sema4f	2
R-MMU-418555	G alpha (s) signalling events	1/23	132/8582	0.300209	0.341495	0.280561	Pde3b	1
R-MMU-8980692	RHOA GTPase cycle	1/23	134/8582	0.304014	0.341495	0.280561	Pcdh7	1
R-MMU-5358351	Signaling by Hedgehog	1/23	138/8582	0.311564	0.345246	0.283643	Gas1	1
R-MMU-1266738	Developmental Biology	2/23	447/8582	0.338579	0.37018	0.304127	Ephb2/Gfra1	2
R-MMU-109582	Hemostasis	2/23	492/8582	0.383153	0.413401	0.339637	Pcdh7/Angpt1	2
R-MMU-425407	SLC-mediated transmembrane transport	1/23	218/8582	0.447092	0.476124	0.391168	Slc13a1	1
R-MMU-1257604	PIP3 activates AKT signaling	1/23	230/8582	0.465076	0.482737	0.3966	Kit	1
R-MMU-1474244	Extracellular matrix organization	1/23	230/8582	0.465076	0.482737	0.3966	Fbn2	1
R-MMU-76002	Platelet activation signaling and aggregation	1/23	246/8582	0.488185	0.50039	0.411103	Pcdh7	1
R-MMU-9006925	Intracellular signaling by second messengers	1/23	256/8582	0.50214	0.508339	0.417634	Kit	1
R-MMU-71387	Metabolism of carbohydrates	1/23	263/8582	0.511691	0.511691	0.420388	Ust	1

## Sheet: GO_DGE_MOL56_MOL2_Early
ID	Description	GeneRatio	BgRatio	pvalue	p.adjust	qvalue	geneID	Count	Significant
R-MMU-8963899	Plasma lipoprotein remodeling	2/26	28/8582	0.00317864	0.216525	0.179656	Pcsk5/Apoe	2
R-MMU-112314	Neurotransmitter receptors and postsynaptic signal transmission	3/26	138/8582	0.00806964	0.216525	0.179656	Lrrc7/Gabrb3/Gabra3	3
R-MMU-977443	GABA receptor activation	2/26	57/8582	0.0127179	0.216525	0.179656	Gabrb3/Gabra3	2
R-MMU-112316	Neuronal System	4/26	323/8582	0.0152953	0.216525	0.179656	Lrrc7/Gabrb3/Gabra3/Kcna2	4
R-MMU-174824	Plasma lipoprotein assembly remodeling and clearance	2/26	64/8582	0.015858	0.216525	0.179656	Pcsk5/Apoe	2
R-MMU-112315	Transmission across Chemical Synapses	3/26	201/8582	0.0221403	0.216525	0.179656	Lrrc7/Gabrb3/Gabra3	3
R-MMU-198693	AKT phosphorylates targets in the nucleus	1/26	10/8582	0.0299017	0.216525	0.179656	Nr4a1	1
R-MMU-8964058	HDL remodeling	1/26	10/8582	0.0299017	0.216525	0.179656	Apoe	1
R-MMU-8963888	Chylomicron assembly	1/26	11/8582	0.0328442	0.216525	0.179656	Apoe	1
R-MMU-8963889	Assembly of active LPL and LIPC lipase complexes	1/26	11/8582	0.0328442	0.216525	0.179656	Pcsk5	1
R-MMU-8963901	Chylomicron remodeling	1/26	11/8582	0.0328442	0.216525	0.179656	Apoe	1
R-MMU-2162123	Synthesis of Prostaglandins (PG) and Thromboxanes (TX)	1/26	12/8582	0.035778	0.216525	0.179656	Ptgds	1
R-MMU-76002	Platelet activation signaling and aggregation	3/26	246/8582	0.0372153	0.216525	0.179656	Pcdh7/Timp3/Rapgef3	3
R-MMU-392517	Rap1 signalling	1/26	14/8582	0.0416201	0.216525	0.179656	Rapgef3	1
R-MMU-5673001	RAF/MAP kinase cascade	3/26	262/8582	0.0435865	0.216525	0.179656	Cnksr2/Lrrc7/Rasal1	3
R-MMU-5684996	MAPK1/MAPK3 signaling	3/26	268/8582	0.0461101	0.216525	0.179656	Cnksr2/Lrrc7/Rasal1	3
R-MMU-419037	NCAM1 interactions	1/26	16/8582	0.0474281	0.216525	0.179656	St8sia4	1
R-MMU-114608	Platelet degranulation	2/26	117/8582	0.0484161	0.216525	0.179656	Pcdh7/Timp3	2
R-MMU-76005	Response to elevated platelet cytosolic Ca2+	2/26	122/8582	0.052181	0.216525	0.179656	Pcdh7/Timp3	2
R-MMU-373752	Netrin-1 signaling	1/26	19/8582	0.0560767	0.216525	0.179656	Dscam	1
R-MMU-8963898	Plasma lipoprotein assembly	1/26	19/8582	0.0560767	0.216525	0.179656	Apoe	1
R-MMU-5683057	MAPK family signaling cascades	3/26	291/8582	0.0564502	0.216525	0.179656	Cnksr2/Lrrc7/Rasal1	3
R-MMU-109582	Hemostasis	4/26	492/8582	0.0585892	0.216525	0.179656	Pcdh7/Timp3/Kif21b/Rapgef3	4
R-MMU-438066	Unblocking of NMDA receptors glutamate binding and activation	1/26	22/8582	0.0646498	0.228968	0.18998	Lrrc7	1
R-MMU-1660661	Sphingolipid de novo biosynthesis	1/26	24/8582	0.0703235	0.238621	0.197989	Cers6	1
R-MMU-354192	Integrin signaling	1/26	27/8582	0.0787721	0.238621	0.197989	Rapgef3	1
R-MMU-5689896	Ovarian tumor domain proteases	1/26	29/8582	0.0843634	0.238621	0.197989	Rnf128	1
R-MMU-375165	NCAM signaling for neurite out-growth	1/26	31/8582	0.0899221	0.238621	0.197989	St8sia4	1
R-MMU-2129379	Molecules associated with elastic fibres	1/26	32/8582	0.0926893	0.238621	0.197989	Fbn2	1
R-MMU-381676	Glucagon-like Peptide-1 (GLP1) regulates insulin secretion	1/26	32/8582	0.0926893	0.238621	0.197989	Rapgef3	1
R-MMU-2173782	Binding and Uptake of Ligands by Scavenger Receptors	1/26	33/8582	0.0954484	0.238621	0.197989	Apoe	1
R-MMU-4085001	Sialic acid metabolism	1/26	33/8582	0.0954484	0.238621	0.197989	St8sia4	1
R-MMU-5173214	O-glycosylation of TSR domain-containing proteins	1/26	33/8582	0.0954484	0.238621	0.197989	Thbs2	1
R-MMU-8964043	Plasma lipoprotein clearance	1/26	33/8582	0.0954484	0.238621	0.197989	Apoe	1
R-MMU-442755	Activation of NMDA receptors and postsynaptic events	1/26	36/8582	0.103677	0.244794	0.20311	Lrrc7	1
R-MMU-76009	Platelet Aggregation (Plug Formation)	1/26	36/8582	0.103677	0.244794	0.20311	Rapgef3	1
R-MMU-1566948	Elastic fibre formation	1/26	39/8582	0.111834	0.249632	0.207125	Fbn2	1
R-MMU-5674135	MAP2K and MAPK activation	1/26	39/8582	0.111834	0.249632	0.207125	Cnksr2	1
R-MMU-1296072	Voltage gated Potassium channels	1/26	40/8582	0.114537	0.249632	0.207125	Kcna2	1
R-MMU-975634	Retinoid metabolism and transport	1/26	42/8582	0.11992	0.254829	0.211437	Apoe	1
R-MMU-6806667	Metabolism of fat-soluble vitamins	1/26	46/8582	0.13059	0.270736	0.224635	Apoe	1
R-MMU-383280	Nuclear Receptor transcription pathway	1/26	49/8582	0.138511	0.27265	0.226223	Nr4a1	1
R-MMU-425407	SLC-mediated transmembrane transport	2/26	218/8582	0.140462	0.27265	0.226223	Slc13a1/Slc4a10	2
R-MMU-186797	Signaling by PDGF	1/26	50/8582	0.141136	0.27265	0.226223	Thbs2	1
R-MMU-983189	Kinesins	1/26	52/8582	0.146363	0.275262	0.228391	Kif21b	1
R-MMU-2142753	Arachidonic acid metabolism	1/26	53/8582	0.148965	0.275262	0.228391	Ptgds	1
R-MMU-1474244	Extracellular matrix organization	2/26	230/8582	0.15305	0.276793	0.229661	Fbn2/Sh3pxd2a	2
R-MMU-422356	Regulation of insulin secretion	1/26	61/8582	0.169508	0.290862	0.241335	Rapgef3	1
R-MMU-446219	Synthesis of substrates in N-glycan biosythesis	1/26	61/8582	0.169508	0.290862	0.241335	St8sia4	1
R-MMU-422475	Axon guidance	2/26	249/8582	0.173431	0.290862	0.241335	St8sia4/Dscam	2
R-MMU-9675108	Nervous system development	2/26	250/8582	0.174517	0.290862	0.241335	St8sia4/Dscam	2
R-MMU-5658442	Regulation of RAS by GAPs	1/26	67/8582	0.184601	0.296059	0.245646	Rasal1	1
R-MMU-9013026	RHOB GTPase cycle	1/26	67/8582	0.184601	0.296059	0.245646	Pcdh7	1
R-MMU-425366	Transport of bile salts and organic acids metal ions and amine compounds	1/26	70/8582	0.192049	0.300617	0.249428	Slc13a1	1
R-MMU-446193	Biosynthesis of the N-glycan precursor (dolichol lipid-linked oligosaccharide LLO) and transfer to a nascent protein	1/26	71/8582	0.194517	0.300617	0.249428	St8sia4	1
R-MMU-166520	Signaling by NTRKs	1/26	74/8582	0.201877	0.30642	0.254243	Pcsk5	1
R-MMU-163685	Integration of energy metabolism	1/26	77/8582	0.209172	0.310089	0.257287	Rapgef3	1
R-MMU-428157	Sphingolipid metabolism	1/26	78/8582	0.21159	0.310089	0.257287	Cers6	1
R-MMU-2187338	Visual phototransduction	1/26	89/8582	0.237719	0.337741	0.280231	Apoe	1
R-MMU-1500931	Cell-Cell communication	1/26	91/8582	0.242379	0.337741	0.280231	Kirrel2	1
R-MMU-6811434	COPI-dependent Golgi-to-ER retrograde traffic	1/26	91/8582	0.242379	0.337741	0.280231	Kif21b	1
R-MMU-1296071	Potassium Channels	1/26	97/8582	0.256196	0.340978	0.282917	Kcna2	1
R-MMU-5173105	O-linked glycosylation	1/26	97/8582	0.256196	0.340978	0.282917	Thbs2	1
R-MMU-5576891	Cardiac conduction	1/26	98/8582	0.258475	0.340978	0.282917	Kcnip1	1
R-MMU-425393	Transport of inorganic cations/anions and amino acids/oligopeptides	1/26	99/8582	0.260748	0.340978	0.282917	Slc4a10	1
R-MMU-1474228	Degradation of the extracellular matrix	1/26	106/8582	0.276469	0.356058	0.295429	Fbn2	1
R-MMU-8957275	Post-translational protein phosphorylation	1/26	114/8582	0.294042	0.373038	0.309518	Apoe	1
R-MMU-381426	Regulation of Insulin-like Growth Factor (IGF) transport and uptake by Insulin-like Growth Factor Binding Proteins (IGFBPs)	1/26	120/8582	0.306952	0.383024	0.317803	Apoe	1
R-MMU-983231	Factors involved in megakaryocyte development and platelet production	1/26	122/8582	0.311204	0.383024	0.317803	Kif21b	1
R-MMU-8856688	Golgi-to-ER retrograde transport	1/26	124/8582	0.315432	0.383024	0.317803	Kif21b	1
R-MMU-8980692	RHOA GTPase cycle	1/26	134/8582	0.336198	0.40249	0.333955	Pcdh7	1
R-MMU-9006934	Signaling by Receptor Tyrosine Kinases	2/26	400/8582	0.343527	0.405553	0.336496	Thbs2/Pcsk5	2
R-MMU-397014	Muscle contraction	1/26	153/8582	0.373996	0.435475	0.361323	Kcnip1	1
R-MMU-8978868	Fatty acid metabolism	1/26	163/8582	0.39305	0.44848	0.372113	Ptgds	1
R-MMU-1266738	Developmental Biology	2/26	447/8582	0.395718	0.44848	0.372113	St8sia4/Dscam	2
R-MMU-196854	Metabolism of vitamins and cofactors	1/26	169/8582	0.404213	0.452081	0.375101	Apoe	1
R-MMU-6811442	Intra-Golgi and retrograde Golgi-to-ER traffic	1/26	179/8582	0.422381	0.464177	0.385138	Kif21b	1
R-MMU-5689880	Ub-specific processing proteases	1/26	181/8582	0.425951	0.464177	0.385138	Rnf128	1
R-MMU-9709957	Sensory Perception	1/26	192/8582	0.445205	0.479018	0.397451	Apoe	1
R-MMU-1257604	PIP3 activates AKT signaling	1/26	230/8582	0.507056	0.538747	0.44701	Nr4a1	1
R-MMU-5688426	Deubiquitination	1/26	246/8582	0.531065	0.551989	0.457997	Rnf128	1
R-MMU-71291	Metabolism of amino acids and derivatives	1/26	249/8582	0.53544	0.551989	0.457997	Dct	1
R-MMU-446203	Asparagine N-linked glycosylation	1/26	256/8582	0.545495	0.551989	0.457997	St8sia4	1
R-MMU-9006925	Intracellular signaling by second messengers	1/26	256/8582	0.545495	0.551989	0.457997	Nr4a1	1
R-MMU-9012999	RHO GTPase cycle	1/26	395/8582	0.706811	0.706811	0.586456	Pcdh7	1

## Sheet: GO_DGE_MOL56_MOL2_Peak
ID	Description	GeneRatio	BgRatio	pvalue	p.adjust	qvalue	geneID	Count	Significant
R-MMU-112310	Neurotransmitter release cycle	3/20	48/8582	0.000175116	0.0115577	0.00884797	Slc6a11/Slc1a2/Snap25	3	*
R-MMU-888590	GABA synthesis release reuptake and degradation	2/20	18/8582	0.000772022	0.0227872	0.0174447	Slc6a11/Snap25	2	*
R-MMU-112315	Transmission across Chemical Synapses	4/20	201/8582	0.00105394	0.0227872	0.0174447	Gabra2/Slc6a11/Slc1a2/Snap25	4	*
R-MMU-210500	Glutamate Neurotransmitter Release Cycle	2/20	24/8582	0.00138104	0.0227872	0.0174447	Slc1a2/Snap25	2	*
R-MMU-112316	Neuronal System	4/20	323/8582	0.00591624	0.0780944	0.0597852	Gabra2/Slc6a11/Slc1a2/Snap25	4
R-MMU-425407	SLC-mediated transmembrane transport	3/20	218/8582	0.013395	0.147345	0.1128	Slc7a10/Slc6a11/Slc1a2	3
R-MMU-425393	Transport of inorganic cations/anions and amino acids/oligopeptides	2/20	99/8582	0.0218669	0.150948	0.115558	Slc7a10/Slc1a2	2
R-MMU-9759475	Regulation of CDH11 Expression and Function	1/20	12/8582	0.0276273	0.150948	0.115558	Hoxc8	1
R-MMU-9759476	Regulation of Homotypic Cell-Cell Adhesion	1/20	12/8582	0.0276273	0.150948	0.115558	Hoxc8	1
R-MMU-9764260	Regulation of Expression and Function of Type II Classical Cadherins	1/20	12/8582	0.0276273	0.150948	0.115558	Hoxc8	1
R-MMU-5218921	VEGFR2 mediated cell proliferation	1/20	13/8582	0.0298966	0.150948	0.115558	Kdr	1
R-MMU-381426	Regulation of Insulin-like Growth Factor (IGF) transport and uptake by Insulin-like Growth Factor Binding Proteins (IGFBPs)	2/20	120/8582	0.031262	0.150948	0.115558	Igfbp2/Sparcl1	2
R-MMU-419408	Lysosphingolipid and LPA receptors	1/20	14/8582	0.0321608	0.150948	0.115558	Plppr5	1
R-MMU-264642	Acetylcholine Neurotransmitter Release Cycle	1/20	15/8582	0.03442	0.150948	0.115558	Snap25	1
R-MMU-449836	Other interleukin signaling	1/20	15/8582	0.03442	0.150948	0.115558	Snap25	1
R-MMU-442660	Na+/Cl- dependent neurotransmitter transporters	1/20	17/8582	0.0389233	0.150948	0.115558	Slc6a11	1
R-MMU-181429	Serotonin Neurotransmitter Release Cycle	1/20	18/8582	0.0411675	0.150948	0.115558	Snap25	1
R-MMU-181430	Norepinephrine Neurotransmitter Release Cycle	1/20	18/8582	0.0411675	0.150948	0.115558	Snap25	1
R-MMU-75876	Synthesis of very long-chain fatty acyl-CoAs	1/20	22/8582	0.0500946	0.172636	0.132162	Acsbg1	1
R-MMU-212676	Dopamine Neurotransmitter Release Cycle	1/20	23/8582	0.052314	0.172636	0.132162	Snap25	1
R-MMU-2022928	HS-GAG biosynthesis	1/20	28/8582	0.0633374	0.194305	0.148751	Ndst4	1
R-MMU-9753281	Paracetamol ADME	1/20	29/8582	0.0655274	0.194305	0.148751	Gstt1	1
R-MMU-352230	Amino acid transport across the plasma membrane	1/20	30/8582	0.0677125	0.194305	0.148751	Slc7a10	1
R-MMU-190861	Gap junction assembly	1/20	32/8582	0.0720682	0.19599	0.150041	Gjb6	1
R-MMU-75105	Fatty acyl-CoA biosynthesis	1/20	33/8582	0.0742388	0.19599	0.150041	Acsbg1	1
R-MMU-156590	Glutathione conjugation	1/20	37/8582	0.0828731	0.21037	0.161049	Gstt1	1
R-MMU-418990	Adherens junctions interactions	1/20	40/8582	0.0892985	0.210499	0.161147	Hoxc8	1
R-MMU-190828	Gap junction trafficking	1/20	41/8582	0.0914308	0.210499	0.161147	Gjb6	1
R-MMU-3000178	ECM proteoglycans	1/20	42/8582	0.0935584	0.210499	0.161147	Matn1	1
R-MMU-157858	Gap junction trafficking and regulation	1/20	43/8582	0.0956812	0.210499	0.161147	Gjb6	1
R-MMU-421270	Cell-cell junction organization	1/20	48/8582	0.106225	0.222411	0.170266	Hoxc8	1
R-MMU-186797	Signaling by PDGF	1/20	50/8582	0.110409	0.222411	0.170266	Pdgfd	1
R-MMU-1638091	Heparan sulfate/heparin (HS-GAG) metabolism	1/20	52/8582	0.114575	0.222411	0.170266	Ndst4	1
R-MMU-983189	Kinesins	1/20	52/8582	0.114575	0.222411	0.170266	Kif21b	1
R-MMU-977443	GABA receptor activation	1/20	57/8582	0.124909	0.235543	0.18032	Gabra2	1
R-MMU-425366	Transport of bile salts and organic acids metal ions and amine compounds	1/20	70/8582	0.151244	0.276893	0.211976	Slc6a11	1
R-MMU-446728	Cell junction organization	1/20	72/8582	0.155228	0.276893	0.211976	Hoxc8	1
R-MMU-6803157	Antimicrobial peptides	1/20	90/8582	0.190294	0.306787	0.234861	Chga	1
R-MMU-1500931	Cell-Cell communication	1/20	91/8582	0.192201	0.306787	0.234861	Hoxc8	1
R-MMU-6811434	COPI-dependent Golgi-to-ER retrograde traffic	1/20	91/8582	0.192201	0.306787	0.234861	Kif21b	1
R-MMU-4420097	VEGFA-VEGFR2 Pathway	1/20	92/8582	0.194104	0.306787	0.234861	Kdr	1
R-MMU-156580	Phase II - Conjugation of compounds	1/20	95/8582	0.199786	0.306787	0.234861	Gstt1	1
R-MMU-5576891	Cardiac conduction	1/20	98/8582	0.205431	0.306787	0.234861	Kcnip1	1
R-MMU-9748784	Drug ADME	1/20	98/8582	0.205431	0.306787	0.234861	Gstt1	1
R-MMU-194138	Signaling by VEGF	1/20	100/8582	0.209173	0.306787	0.234861	Kdr	1
R-MMU-8957275	Post-translational protein phosphorylation	1/20	114/8582	0.234902	0.32085	0.245627	Sparcl1	1
R-MMU-9006934	Signaling by Receptor Tyrosine Kinases	2/20	400/8582	0.238586	0.32085	0.245627	Pdgfd/Kdr	2
R-MMU-114608	Platelet degranulation	1/20	117/8582	0.240311	0.32085	0.245627	Timp3	1
R-MMU-1630316	Glycosaminoglycan metabolism	1/20	119/8582	0.243897	0.32085	0.245627	Ndst4	1
R-MMU-76005	Response to elevated platelet cytosolic Ca2+	1/20	122/8582	0.249245	0.32085	0.245627	Timp3	1
R-MMU-983231	Factors involved in megakaryocyte development and platelet production	1/20	122/8582	0.249245	0.32085	0.245627	Kif21b	1
R-MMU-8856688	Golgi-to-ER retrograde transport	1/20	124/8582	0.252791	0.32085	0.245627	Kif21b	1
R-MMU-112314	Neurotransmitter receptors and postsynaptic signal transmission	1/20	138/8582	0.277169	0.345154	0.264232	Gabra2	1
R-MMU-397014	Muscle contraction	1/20	153/8582	0.302449	0.36966	0.282993	Kcnip1	1
R-MMU-8978868	Fatty acid metabolism	1/20	163/8582	0.318833	0.376592	0.2883	Acsbg1	1
R-MMU-109582	Hemostasis	2/20	492/8582	0.319533	0.376592	0.2883	Timp3/Kif21b	2
R-MMU-6811442	Intra-Golgi and retrograde Golgi-to-ER traffic	1/20	179/8582	0.34429	0.398651	0.305188	Kif21b	1
R-MMU-211859	Biological oxidations	1/20	201/8582	0.377821	0.429934	0.329136	Gstt1	1
R-MMU-1474244	Extracellular matrix organization	1/20	230/8582	0.419537	0.469313	0.359283	Matn1	1
R-MMU-76002	Platelet activation signaling and aggregation	1/20	246/8582	0.441402	0.481922	0.368936	Timp3	1
R-MMU-71291	Metabolism of amino acids and derivatives	1/20	249/8582	0.445413	0.481922	0.368936	Slc6a11	1
R-MMU-71387	Metabolism of carbohydrates	1/20	263/8582	0.463774	0.489901	0.375044	Ndst4	1
R-MMU-449147	Signaling by Interleukins	1/20	266/8582	0.467633	0.489901	0.375044	Snap25	1
R-MMU-373076	Class A/1 (Rhodopsin-like receptors)	1/20	307/8582	0.517794	0.533975	0.408785	Plppr5	1
R-MMU-500792	GPCR ligand binding	1/20	394/8582	0.609768	0.619149	0.47399	Plppr5	1
R-MMU-1280215	Cytokine Signaling in Immune system	1/20	447/8582	0.657349	0.657349	0.503234	Snap25	1

[truncated: 1 more sheets: GO_DGE_MOL56_MOL2_Late]
