# Supplementary material for: Distinct transcriptomic and epigenomic responses of mature oligodendrocytes during disease progression in a mouse model of multiple sclerosis
Source: Nat Neurosci. 2025 Nov 17;28(12):2612–27. doi: 10.1038/s41593-025-02100-3 (PMC12672374; doi:10.1038/s41593-025-02100-3)
Supplement: Supplementary file 9 — Differentially expressed genes and accessibility in OLG populations. [file 41593_2025_2100_MOESM9_ESM.xlsx]

## Sheet: Summary
Supplementary Table 7. Genes differentially expressed and accessible in OLG populations
Naming of the sheets
MOL56	Aggregated differentially expressed and accessible genes using DESeq2 across all timepoints in MOL56 (Early/Ctrl, Peak/Early, Late/Early, and Peak/Late) with absolute log2FC > 1, pvalue adjusted < 0.01 and baseMean > 1
MOL2	Aggregated differentially expressed and accessible genes using DESeq2 across all timepoints in MOL2 (Early/Ctrl, Peak/Early, Late/Early, and Peak/Late) with absolute log2FC > 1, pvalue adjusted < 0.01 and baseMean > 1
OPC	Aggregated differentially expressed and accessible genes using DESeq2 across all timepoints in OPC (Early/Ctrl, Peak/Early, Late/Early, and Peak/Late) with absolute log2FC > 1, pvalue adjusted < 0.01 and baseMean > 1

## Sheet: MOL56
4632428C04Rik
9330175E14Rik
A330102I10Rik
Acsl5
Apoe
Apol9b
B3galnt1
Bcl3
Bst2
C4b
Casp12
Cd274
Cdh22
Cebpb
Ciita
Clec2d
Cmpk2
Col7a1
Cxcl14
Ddx4
Ddx60
Dtx3l
Eif2ak2
Ermard
F830016B08Rik
Fam13a
Fgl2
Folr2
Fosl2
Gbp2
Gbp3
Gbp4
Gbp5
Gbp7
Gbp8
Gbp9
Ggta1
Glis3
Gm12185
Gm19684
Gm28905
Gm3448
Gm4841
Gm4951
Gm7030
Gpr50
H2-M3
H2-Q4
H2-Q7
H2-T23
H2-T24
Herc6
Hpgd
Hspb8
Ifi27l2a
Ifi44
Ifi47
Ifit1
Ifit3
Ifitm3
Igf2bp2
Igtp
Iigp1
Il15ra
Il18bp
Il6ra
Irf1
Irf7
Irf8
Irf9
Irgm1
Irgm2
Isg15
Kcnk10
Kcnk2
Klk7
Klk9
Lgals3bp
Ly6a
Ly6e
Magee2
Mgst2
Mill2
Mpeg1
Mrgpra1
Mrgpra2b
Mrgpra6
Mrgpra9
Ndst4
Nlrc5
Oas1a
Oas1c
Oas1g
Oasl1
Oasl2
Olfr56
Panx1
Papss2
Parp14
Parp9
Phf11d
Piezo2
Psmb8
Psmb9
Ptpn5
Rgs20
Ric3
Rnf213
Rtp4
Runx1
Samd9l
Serpina3f
Serpina3i
Serpina3m
Serpina3n
Serping1
Shisa5
Slc10a6
Slc39a14
Slfn8
Slfn9
Snx10
Socs3
Sox11
St8sia5
Sult1a1
Syt6
Tap1
Tgtp1
Tgtp2
Timp1
Tlr3
Tnfrsf1a
Tnfsf11
Trim12a
Trim12c
Trim21
Trim25
Trim30d
Trim34a
Trim5
Trim56
Ucn2
Usp18
Vav3
Vwa5a
Zbp1
Zc3hav1
Barx2
Col13a1
Col6a1
Col6a2
Crmp1
Dnah7b
Gm13844
Gm14532
Gm3604
Gulp1
H2-Q6
Hcn1
Igfbpl1
Maob
Nox4
Nxpe4
Pqlc3
Ptchd1
Slc35f4
St3gal1
Tmem28
Tnfsf10
Aldh1b1
Bex2
Ccdc85a
Dbx2
G630018N14Rik
Galnt18
Gm14061
Gm26512
Hoxa9
Irf4
Itpripl2
Lepr
Naalad2
Rdh16
Sema4f
Slc22a21
Slc25a24
Slc6a7
Tmem176a
Tmem176b
Tnfrsf1b
Trerf1
Wfdc12
Zfp804b
A530053G22Rik
Agmo
Arhgap44
Chp2
Etnppl
Gm14133
Rgs7
Zfp872

## Sheet: MOL2
4933406I18Rik
9330175E14Rik
AU020206
Acsl5
Angpt1
Apoe
Apol9a
Apol9b
Arhgap28
Bcl3
Bex2
Bst2
C1ra
C4b
Cacna1h
Cacng5
Cd274
Cdh22
Cebpb
Cemip
Chac1
Clec2d
Cmpk2
Cntn1
Col7a1
Ddx60
Dtx3l
Eif2ak2
Emp3
Ermard
F830016B08Rik
Fads2
Fam13a
Fgl2
Gabra3
Galnt18
Gbp2
Gbp3
Gbp4
Gbp5
Gbp6
Gbp7
Gbp8
Gbp9
Ggta1
Gldn
Gm12185
Gm3448
Gm4841
Gm4951
Gpr151
Gria3
H2-K1
H2-M3
H2-Q4
H2-Q7
H2-T24
Herc6
Hmgcll1
Hspb1
Ido1
Ier5l
Ifi44
Ifi47
Ifit1
Ifit3
Ifitm3
Igtp
Iigp1
Il15ra
Irf1
Irf7
Irf8
Irf9
Irgm1
Irgm2
Isg15
Itga5
Kcnj3
Kcnj6
Kcnk10
Kcnn3
Kit
Klk7
Klk9
Layn
Lgals3
Lgals3bp
Lgals9
Lrtm2
Ly6a
Ly6c1
Ly6e
Mt2
Myzap
Nupr1
Oas1a
Oas1c
Oas1g
Oas2
Oasl1
Oasl2
Osmr
Parp14
Parp9
Pcdhb9
Pde3b
Pik3r5
Plvap
Psmb8
Psmb9
Ptpn5
Rbp1
Rgs20
Ric3
Rsad2
Rtp4
Runx1
S100a10
Samd9l
Sdc3
Serpina3c
Serpina3i
Serpina3m
Serpina3n
Serpine1
Serping1
Sh3rf3
Shisa5
Slc10a6
Slc2a10
Slco5a1
Slfn8
Slfn9
Snx10
Socs3
Steap3
Stk32a
Sulf1
Sult1a1
Synpr
Syt4
Syt6
Tagln2
Tap1
Tgm2
Tgtp2
Timp1
Tmem176a
Tmem176b
Tnfrsf1a
Tnfsf11
Trim12a
Trim12c
Trim21
Trim25
Trim30d
Trim34a
Tubb6
Ucn2
Usp18
Zbp1
Zc3hav1
A830019P07Rik
Anxa4
Arg1
Casp12
Cast
Ccl8
Ciita
Clrn1
Cntf
Crlf2
Crmp1
Ctxn3
Cxcl14
Dhrs3
Dner
Dusp6
Eef1a2
Egln3
Etnppl
Fxyd1
Fxyd5
Fxyd7
Gm14532
Gm19684
Gm3604
Gpr143
H2-Q6
Hnmt
Hspb8
Ifitm2
Il18bp
Il3ra
Itpripl2
Lynx1
Mill2
Mocos
Mpeg1
Olfr56
Phf11d
Ppl
Pqlc3
Reln
Rhobtb1
Rnf182
S100a11
S100a4
Scg3
Scn1b
Serpinb9
Sfxn1
Slc25a24
Slc27a6
Sox11
Tgtp1
Tmem200a
Tnfrsf1b
Tnfsf10
Trim5
Ubd
Upp1
Wfdc18
Zeb1
Col13a1
Ddx4
Gm12526
Hmcn1
Lepr
Prickle3
Rgsl1
Slc6a20b
9530026P05Rik
Axl
Cadps
Gad2
Gldc
Gm8369
Igsf21
Kank1
Kcnh8
Sdc2
Sphkap

## Sheet: OPC
Agtr1b
Bcl3
C4b
Cacng5
Cd44
Cd74
Ciita
Clec2d
Dnah7b
Dtx3l
Ermard
Gbp2
Gbp3
Gbp5
Gbp6
Gbp7
Gli3
Glis3
Gm12185
Gm3448
Gm4951
H2-Aa
H2-Q4
H2-Q7
Herc6
Icam1
Ifi47
Ifit3
Igtp
Iigp1
Il1r1
Irf7
Irgm1
Irgm2
Matn2
Oasl2
Olfr56
Osmr
Parp14
Piezo2
Psmb8
Serpina3n
Shisa5
Slc39a14
Slfn9
Sv2c
Syt4
Tnfrsf1a
Zbp1
H2-Q6
Moxd1
Ndst3
Plscr4
Prune2
A2m
Gbp9
Gm16223
Gm813
Serpina3i
Tgtp1
