# Supplementary material for: Distinct transcriptomic and epigenomic responses of mature oligodendrocytes during disease progression in a mouse model of multiple sclerosis
Source: Nat Neurosci. 2025 Nov 17;28(12):2612–27. doi: 10.1038/s41593-025-02100-3 (PMC12672374; doi:10.1038/s41593-025-02100-3)
Supplement: Supplementary file 10 — GO of differentially expressed genes and accessibility in OLG populations. [file 41593_2025_2100_MOESM10_ESM.xlsx]

## Sheet: Summary
Supplementary Table 8. Genes ontology of genes differentially expressed and accessible in OLG populations
Naming of the sheets	GO_(Features Selection Acronym)_(OLG population)
GO	Gene Ontology using Ensembl via biomaRt on all variable genes across timepoints before annotation (pvalueCutoff=1, qvalueCutoff=1, pAdjustMethod="fdr").
Features Selection Acronym	Full Name	Description
DGEA	Differential Genes Expression and Accessibility	Aggregated differentially expressed and accessible genes using DESeq2 across all timepoints (Early/Ctrl, Peak/Early, Late/Early, and Peak/Late) with absolute log2FC > 1, pvalue adjusted < 0.01 and baseMean > 1
OLG population
MOL56
MOL2
OPC
Metrics explanation
ID	Pathway Identifier
Description	Description of the pathway
GeneRatio (M/N)	M/N where M is the number of genes of interest in the gene set and N is the total number of genes of interest
BgRatio (k/n)	k/n where k is the number of genes in the gene set and n is the total number of genes in all gene sets
pvalue	p-value
p.adjust	p-value ajusted by Bonferroni-Hochberg correction
qvalue	q-value (estimate of the FDR associated with the p-value ajusted by Bonferroni-Hochberg correction)
geneID	Gene name
Count	Number of gene annotated in a gene set
Significant	* (p.adjust < 0.05)

## Sheet: GO_DGEA_MOL2
ID	Description	GeneRatio	BgRatio	pvalue	p.adjust	qvalue	geneID	Count	Significant
R-MMU-1236974	ER-Phagosome pathway	6/105	33/8582	2.46119e-06	0.000962326	0.000883438	H2-K1/H2-M3/H2-Q4/H2-Q7/Tap1/H2-Q6	6	*
R-MMU-983170	Antigen Presentation: Folding assembly and peptide loading of class I MHC	6/105	40/8582	7.95785e-06	0.0011471	0.00105306	H2-K1/H2-M3/H2-Q4/H2-Q7/Tap1/H2-Q6	6	*
R-MMU-1236977	Endosomal/Vacuolar pathway	5/105	24/8582	8.80127e-06	0.0011471	0.00105306	H2-K1/H2-M3/H2-Q4/H2-Q7/H2-Q6	5	*
R-MMU-1236975	Antigen processing-Cross presentation	8/105	91/8582	1.40935e-05	0.00137764	0.0012647	H2-K1/H2-M3/H2-Q4/H2-Q7/Psmb8/Psmb9/Tap1/H2-Q6	8	*
R-MMU-1280215	Cytokine Signaling in Immune system	17/105	447/8582	2.638e-05	0.00206292	0.00189381	Eif2ak2/Il15ra/Irf9/Isg15/Oasl1/Osmr/Psmb8/Psmb9/Socs3/Tnfrsf1a/Tnfsf11/Trim25/Tubb6/Usp18/Cntf/Dusp6/Tnfrsf1b	17	*
R-MMU-8957275	Post-translational protein phosphorylation	8/105	114/8582	7.23891e-05	0.00471735	0.00433064	Apoe/Apol9a/Apol9b/C4b/Shisa5/Timp1/Scg3/Sdc2	8	*
R-MMU-381426	Regulation of Insulin-like Growth Factor (IGF) transport and uptake by Insulin-like Growth Factor Binding Proteins (IGFBPs)	8/105	120/8582	0.000104046	0.00581173	0.00533531	Apoe/Apol9a/Apol9b/C4b/Shisa5/Timp1/Scg3/Sdc2	8	*
R-MMU-198933	Immunoregulatory interactions between a Lymphoid and a non-Lymphoid cell	7/105	95/8582	0.000153445	0.00749961	0.00688482	H2-K1/H2-M3/H2-Q4/H2-Q7/Ifitm3/H2-Q6/Ifitm2	7	*
R-MMU-913531	Interferon Signaling	8/105	131/8582	0.000191755	0.00833068	0.00764776	Eif2ak2/Irf9/Isg15/Oasl1/Socs3/Trim25/Tubb6/Usp18	8	*
R-MMU-1169408	ISG15 antiviral mechanism	4/105	28/8582	0.000345572	0.0135119	0.0124042	Eif2ak2/Isg15/Trim25/Usp18	4	*
R-MMU-983169	Class I MHC mediated antigen processing & presentation	12/105	342/8582	0.00091776	0.0276034	0.0253406	Dtx3l/H2-K1/H2-M3/H2-Q4/H2-Q7/Herc6/Psmb8/Psmb9/Socs3/Tap1/H2-Q6/Rnf182	12	*
R-MMU-1169410	Antiviral mechanism by IFN-stimulated genes	6/105	91/8582	0.000835277	0.0276034	0.0253406	Eif2ak2/Isg15/Oasl1/Trim25/Tubb6/Usp18	6	*
R-MMU-2172127	DAP12 interactions	5/105	61/8582	0.000860628	0.0276034	0.0253406	H2-K1/H2-M3/H2-Q4/H2-Q7/H2-Q6	5	*
R-MMU-975634	Retinoid metabolism and transport	4/105	42/8582	0.00165681	0.0462723	0.0424791	Apoe/Rbp1/Sdc3/Sdc2	4	*
R-MMU-6806667	Metabolism of fat-soluble vitamins	4/105	46/8582	0.00232687	0.056863	0.0522016	Apoe/Rbp1/Sdc3/Sdc2	4
R-MMU-6783589	Interleukin-6 family signaling	3/105	22/8582	0.0023142	0.056863	0.0522016	Osmr/Socs3/Cntf	3
R-MMU-114608	Platelet degranulation	6/105	117/8582	0.0030364	0.0698373	0.0641123	Lgals3bp/Serpina3i/Serping1/Tagln2/Timp1/Scg3	6
R-MMU-5669034	TNFs bind their physiological receptors	3/105	25/8582	0.00336558	0.0731078	0.0671147	Tnfrsf1a/Tnfsf11/Tnfrsf1b	3
R-MMU-76005	Response to elevated platelet cytosolic Ca2+	6/105	122/8582	0.00373677	0.0768989	0.070595	Lgals3bp/Serpina3i/Serping1/Tagln2/Timp1/Scg3	6
R-MMU-196854	Metabolism of vitamins and cofactors	7/105	169/8582	0.00458119	0.0853931	0.0783929	Apoe/Parp14/Parp9/Rbp1/Sdc3/Mocos/Sdc2	7
R-MMU-2187338	Visual phototransduction	5/105	89/8582	0.00458633	0.0853931	0.0783929	Apoe/Rbp1/Sdc3/Dhrs3/Sdc2	5
R-MMU-909733	Interferon alpha/beta signaling	3/105	29/8582	0.00516098	0.0917248	0.0842055	Irf9/Socs3/Usp18	3
R-MMU-109582	Hemostasis	13/105	492/8582	0.00680443	0.106135	0.0974345	Angpt1/Itga5/Lgals3bp/Pik3r5/S100a10/Sdc3/Serpina3i/Serping1/Tagln2/Timp1/Tubb6/Scg3/Sdc2	13
R-MMU-1474244	Extracellular matrix organization	8/105	230/8582	0.00705757	0.106135	0.0974345	Col7a1/Itga5/Klk7/Sdc3/Timp1/Cast/Col13a1/Sdc2	8
R-MMU-5668541	TNFR2 non-canonical NF-kB pathway	5/105	96/8582	0.00631563	0.106135	0.0974345	Psmb8/Psmb9/Tnfrsf1a/Tnfsf11/Tnfrsf1b	5
R-MMU-1296071	Potassium Channels	5/105	97/8582	0.00659543	0.106135	0.0974345	Kcnj3/Kcnj6/Kcnk10/Kcnn3/Kcnh8	5
R-MMU-9833482	PKR-mediated signaling	4/105	64/8582	0.00766229	0.106998	0.0982271	Eif2ak2/Isg15/Trim25/Tubb6	4
R-MMU-2173782	Binding and Uptake of Ligands by Scavenger Receptors	3/105	33/8582	0.00743883	0.106998	0.0982271	Apoe/Apol9a/Apol9b	3
R-MMU-1474228	Degradation of the extracellular matrix	5/105	106/8582	0.00951614	0.124027	0.11386	Col7a1/Klk7/Timp1/Cast/Col13a1	5
R-MMU-977606	Regulation of Complement cascade	3/105	36/8582	0.00948092	0.124027	0.11386	C1ra/C4b/Serping1	3
R-MMU-449147	Signaling by Interleukins	8/105	266/8582	0.0160481	0.190146	0.174559	Il15ra/Osmr/Psmb8/Psmb9/Socs3/Usp18/Cntf/Dusp6	8
R-MMU-3000170	Syndecan interactions	2/105	16/8582	0.0159118	0.190146	0.174559	Sdc3/Sdc2	2
R-MMU-6788467	IL-6-type cytokine receptor ligand interactions	2/105	16/8582	0.0159118	0.190146	0.174559	Osmr/Cntf	2
R-MMU-166658	Complement cascade	3/105	46/8582	0.0184631	0.212326	0.194921	C1ra/C4b/Serping1	3
R-MMU-197264	Nicotinamide salvaging	2/105	18/8582	0.0199684	0.223076	0.204789	Parp14/Parp9	2
R-MMU-202733	Cell surface interactions at the vascular wall	4/105	89/8582	0.0233749	0.253877	0.233065	Angpt1/Itga5/Sdc3/Sdc2	4
R-MMU-166663	Initial triggering of complement	2/105	20/8582	0.0244082	0.257935	0.23679	C1ra/C4b	2
R-MMU-2024096	HS-GAG degradation	2/105	21/8582	0.0267652	0.2754	0.252823	Sdc3/Sdc2	2
R-MMU-2168880	Scavenging of heme from plasma	2/105	22/8582	0.0292103	0.292852	0.268845	Apol9a/Apol9b	2
R-MMU-76002	Platelet activation signaling and aggregation	7/105	246/8582	0.0309101	0.293997	0.269897	Lgals3bp/Pik3r5/Serpina3i/Serping1/Tagln2/Timp1/Scg3	7
R-MMU-450408	AUF1 (hnRNP D0) binds and destabilizes mRNA	3/105	56/8582	0.0308981	0.293997	0.269897	Hspb1/Psmb8/Psmb9	3
R-MMU-977443	GABA receptor activation	3/105	57/8582	0.0323322	0.293997	0.269897	Gabra3/Kcnj3/Kcnj6	3
R-MMU-1971475	A tetrasaccharide linker sequence is required for GAG synthesis	2/105	23/8582	0.031741	0.293997	0.269897	Sdc3/Sdc2	2
R-MMU-112316	Neuronal System	8/105	323/8582	0.043946	0.365732	0.335751	Gabra3/Gria3/Kcnj3/Kcnj6/Kcnk10/Kcnn3/Gad2/Kcnh8	8
R-MMU-1234176	Oxygen-dependent proline hydroxylation of Hypoxia-inducible Factor Alpha	3/105	66/8582	0.0467688	0.365732	0.335751	Psmb8/Psmb9/Egln3	3
R-MMU-216083	Integrin cell surface interactions	3/105	66/8582	0.0467688	0.365732	0.335751	Col7a1/Itga5/Col13a1	3
R-MMU-1296041	Activation of G protein gated Potassium channels	2/105	28/8582	0.0455957	0.365732	0.335751	Kcnj3/Kcnj6	2
R-MMU-1296059	G protein gated Potassium channels	2/105	28/8582	0.0455957	0.365732	0.335751	Kcnj3/Kcnj6	2
R-MMU-2022928	HS-GAG biosynthesis	2/105	28/8582	0.0455957	0.365732	0.335751	Sdc3/Sdc2	2
R-MMU-997272	Inhibition of voltage gated Ca2+ channels via Gbeta/gamma subunits	2/105	28/8582	0.0455957	0.365732	0.335751	Kcnj3/Kcnj6	2
R-MMU-196807	Nicotinate metabolism	2/105	30/8582	0.0516556	0.38841	0.35657	Parp14/Parp9	2
R-MMU-5656169	Termination of translesion DNA synthesis	2/105	30/8582	0.0516556	0.38841	0.35657	Isg15/Trim25	2
R-MMU-1234174	Cellular response to hypoxia	3/105	70/8582	0.0540472	0.398725	0.366039	Psmb8/Psmb9/Egln3	3
R-MMU-3000171	Non-integrin membrane-ECM interactions	2/105	32/8582	0.0579855	0.419858	0.38544	Sdc3/Sdc2	2
R-MMU-5687128	MAPK6/MAPK4 signaling	3/105	73/8582	0.0598417	0.42542	0.390546	Hspb1/Psmb8/Psmb9	3
R-MMU-8852276	The role of GTSE1 in G2/M progression after G2 checkpoint	3/105	75/8582	0.0638606	0.442921	0.406612	Psmb8/Psmb9/Tubb6	3
R-MMU-1296065	Inwardly rectifying K+ channels	2/105	34/8582	0.0645691	0.442921	0.406612	Kcnj3/Kcnj6	2
R-MMU-168164	Toll Like Receptor 3 (TLR3) Cascade	3/105	76/8582	0.0659161	0.444365	0.407938	Irf7/Usp18/Dusp6	3
R-MMU-8948216	Collagen chain trimerization	2/105	35/8582	0.067951	0.450319	0.413404	Col7a1/Col13a1	2
R-MMU-983168	Antigen processing: Ubiquitination & Proteasome degradation	6/105	285/8582	0.136025	0.475583	0.436596	Dtx3l/Herc6/Psmb8/Psmb9/Socs3/Rnf182	6
R-MMU-5683057	MAPK family signaling cascades	6/105	291/8582	0.145833	0.475583	0.436596	Angpt1/Hspb1/Kit/Psmb8/Psmb9/Dusp6	6
R-MMU-9709957	Sensory Perception	5/105	192/8582	0.0860858	0.475583	0.436596	Apoe/Rbp1/Sdc3/Dhrs3/Sdc2	5
R-MMU-112315	Transmission across Chemical Synapses	5/105	201/8582	0.0997996	0.475583	0.436596	Gabra3/Gria3/Kcnj3/Kcnj6/Gad2	5
R-MMU-422475	Axon guidance	5/105	249/8582	0.189141	0.475583	0.436596	Itga5/Tubb6/Crmp1/Reln/Sdc2	5
R-MMU-71291	Metabolism of amino acids and derivatives	5/105	249/8582	0.189141	0.475583	0.436596	Ido1/Psmb8/Psmb9/Arg1/Gldc	5
R-MMU-9675108	Nervous system development	5/105	250/8582	0.191253	0.475583	0.436596	Itga5/Tubb6/Crmp1/Reln/Sdc2	5
R-MMU-5673001	RAF/MAP kinase cascade	5/105	262/8582	0.217228	0.475583	0.436596	Angpt1/Kit/Psmb8/Psmb9/Dusp6	5
R-MMU-5684996	MAPK1/MAPK3 signaling	5/105	268/8582	0.230621	0.475583	0.436596	Angpt1/Kit/Psmb8/Psmb9/Dusp6	5
R-MMU-112314	Neurotransmitter receptors and postsynaptic signal transmission	4/105	138/8582	0.0886738	0.475583	0.436596	Gabra3/Gria3/Kcnj3/Kcnj6	4
R-MMU-975155	MyD88 dependent cascade initiated on endosome	3/105	84/8582	0.0834221	0.475583	0.436596	Irf7/Usp18/Dusp6	3
R-MMU-168181	Toll Like Receptor 7/8 (TLR7/8) Cascade	3/105	85/8582	0.0857383	0.475583	0.436596	Irf7/Usp18/Dusp6	3
R-MMU-450531	Regulation of mRNA stability by proteins that bind AU-rich elements	3/105	85/8582	0.0857383	0.475583	0.436596	Hspb1/Psmb8/Psmb9	3
R-MMU-168138	Toll Like Receptor 9 (TLR9) Cascade	3/105	89/8582	0.0952734	0.475583	0.436596	Irf7/Usp18/Dusp6	3
R-MMU-166166	MyD88-independent TLR4 cascade	3/105	95/8582	0.110347	0.475583	0.436596	Irf7/Usp18/Dusp6	3
R-MMU-937061	TRIF(TICAM1)-mediated TLR4 signaling	3/105	95/8582	0.110347	0.475583	0.436596	Irf7/Usp18/Dusp6	3
R-MMU-5576891	Cardiac conduction	3/105	98/8582	0.118209	0.475583	0.436596	Kcnk10/Fxyd1/Fxyd7	3
R-MMU-9020702	Interleukin-1 signaling	3/105	102/8582	0.129007	0.475583	0.436596	Psmb8/Psmb9/Usp18	3
R-MMU-5610787	Hedgehog 'off' state	3/105	106/8582	0.140143	0.475583	0.436596	Psmb8/Psmb9/Tubb6	3
R-MMU-196849	Metabolism of water-soluble vitamins and cofactors	3/105	110/8582	0.151593	0.475583	0.436596	Parp14/Parp9/Mocos	3
R-MMU-166016	Toll Like Receptor 4 (TLR4) Cascade	3/105	111/8582	0.154501	0.475583	0.436596	Irf7/Usp18/Dusp6	3
R-MMU-446652	Interleukin-1 family signaling	3/105	115/8582	0.166309	0.475583	0.436596	Psmb8/Psmb9/Usp18	3
R-MMU-1630316	Glycosaminoglycan metabolism	3/105	119/8582	0.178376	0.475583	0.436596	Cemip/Sdc3/Sdc2	3
R-MMU-5358351	Signaling by Hedgehog	3/105	138/8582	0.238508	0.475583	0.436596	Psmb8/Psmb9/Tubb6	3
R-MMU-168898	Toll-like Receptor Cascades	3/105	139/8582	0.241773	0.475583	0.436596	Irf7/Usp18/Dusp6	3
R-MMU-110313	Translesion synthesis by Y family DNA polymerases bypasses lesions on DNA template	2/105	37/8582	0.0748855	0.475583	0.436596	Isg15/Trim25	2
R-MMU-977444	GABA B receptor activation	2/105	41/8582	0.0893856	0.475583	0.436596	Kcnj3/Kcnj6	2
R-MMU-991365	Activation of GABAB receptors	2/105	41/8582	0.0893856	0.475583	0.436596	Kcnj3/Kcnj6	2
R-MMU-1793185	Chondroitin sulfate/dermatan sulfate metabolism	2/105	46/8582	0.108551	0.475583	0.436596	Sdc3/Sdc2	2
R-MMU-73893	DNA Damage Bypass	2/105	46/8582	0.108551	0.475583	0.436596	Isg15/Trim25	2
R-MMU-1236978	Cross-presentation of soluble exogenous antigens (endosomes)	2/105	49/8582	0.120528	0.475583	0.436596	Psmb8/Psmb9	2
R-MMU-350562	Regulation of ornithine decarboxylase (ODC)	2/105	51/8582	0.128687	0.475583	0.436596	Psmb8/Psmb9	2
R-MMU-75815	Ubiquitin-dependent degradation of Cyclin D	2/105	51/8582	0.128687	0.475583	0.436596	Psmb8/Psmb9	2
R-MMU-9762114	GSK3B and BTRC:CUL1-mediated-degradation of NFE2L2	2/105	51/8582	0.128687	0.475583	0.436596	Psmb8/Psmb9	2
R-MMU-1638091	Heparan sulfate/heparin (HS-GAG) metabolism	2/105	52/8582	0.132814	0.475583	0.436596	Sdc3/Sdc2	2
R-MMU-349425	Autodegradation of the E3 ubiquitin ligase COP1	2/105	52/8582	0.132814	0.475583	0.436596	Psmb8/Psmb9	2
R-MMU-5578775	Ion homeostasis	2/105	52/8582	0.132814	0.475583	0.436596	Fxyd1/Fxyd7	2
R-MMU-69601	Ubiquitin Mediated Degradation of Phosphorylated Cdc25A	2/105	52/8582	0.132814	0.475583	0.436596	Psmb8/Psmb9	2
R-MMU-69610	p53-Independent DNA Damage Response	2/105	52/8582	0.132814	0.475583	0.436596	Psmb8/Psmb9	2
R-MMU-69613	p53-Independent G1/S DNA damage checkpoint	2/105	52/8582	0.132814	0.475583	0.436596	Psmb8/Psmb9	2
R-MMU-8939902	Regulation of RUNX2 expression and activity	2/105	52/8582	0.132814	0.475583	0.436596	Psmb8/Psmb9	2
R-MMU-8941858	Regulation of RUNX3 expression and activity	2/105	53/8582	0.136971	0.475583	0.436596	Psmb8/Psmb9	2
R-MMU-8854050	FBXL7 down-regulates AURKA during mitotic entry and in early mitosis	2/105	54/8582	0.141158	0.475583	0.436596	Psmb8/Psmb9	2
R-MMU-936837	Ion transport by P-type ATPases	2/105	54/8582	0.141158	0.475583	0.436596	Fxyd1/Fxyd7	2
R-MMU-1442490	Collagen degradation	2/105	55/8582	0.145371	0.475583	0.436596	Col7a1/Col13a1	2
R-MMU-4641257	Degradation of AXIN	2/105	55/8582	0.145371	0.475583	0.436596	Psmb8/Psmb9	2
R-MMU-9759194	Nuclear events mediated by NFE2L2	2/105	55/8582	0.145371	0.475583	0.436596	Psmb8/Psmb9	2
R-MMU-5610780	Degradation of GLI1 by the proteasome	2/105	56/8582	0.149611	0.475583	0.436596	Psmb8/Psmb9	2
R-MMU-69541	Stabilization of p53	2/105	56/8582	0.149611	0.475583	0.436596	Psmb8/Psmb9	2
R-MMU-4641258	Degradation of DVL	2/105	57/8582	0.153876	0.475583	0.436596	Psmb8/Psmb9	2
R-MMU-5607761	Dectin-1 mediated noncanonical NF-kB signaling	2/105	57/8582	0.153876	0.475583	0.436596	Psmb8/Psmb9	2
R-MMU-5610785	GLI3 is processed to GLI3R by the proteasome	2/105	57/8582	0.153876	0.475583	0.436596	Psmb8/Psmb9	2
R-MMU-5676590	NIK-->noncanonical NF-kB signaling	2/105	57/8582	0.153876	0.475583	0.436596	Psmb8/Psmb9	2
R-MMU-351202	Metabolism of polyamines	2/105	59/8582	0.162475	0.475583	0.436596	Psmb8/Psmb9	2
R-MMU-1650814	Collagen biosynthesis and modifying enzymes	2/105	60/8582	0.166807	0.475583	0.436596	Col7a1/Col13a1	2
R-MMU-187577	SCF(Skp2)-mediated degradation of p27/p21	2/105	60/8582	0.166807	0.475583	0.436596	Psmb8/Psmb9	2
R-MMU-4608870	Asymmetric localization of PCP proteins	2/105	62/8582	0.175531	0.475583	0.436596	Psmb8/Psmb9	2
R-MMU-1169091	Activation of NF-kappaB in B cells	2/105	63/8582	0.17992	0.475583	0.436596	Psmb8/Psmb9	2
R-MMU-373760	L1CAM interactions	2/105	63/8582	0.17992	0.475583	0.436596	Itga5/Tubb6	2
R-MMU-5358346	Hedgehog ligand biogenesis	2/105	63/8582	0.17992	0.475583	0.436596	Psmb8/Psmb9	2
R-MMU-8878166	Transcriptional regulation by RUNX2	2/105	63/8582	0.17992	0.475583	0.436596	Psmb8/Psmb9	2
R-MMU-174084	Autodegradation of Cdh1 by Cdh1:APC/C	2/105	64/8582	0.184327	0.475583	0.436596	Psmb8/Psmb9	2
R-MMU-69563	p53-Dependent G1 DNA Damage Response	2/105	64/8582	0.184327	0.475583	0.436596	Psmb8/Psmb9	2
R-MMU-69580	p53-Dependent G1/S DNA damage checkpoint	2/105	64/8582	0.184327	0.475583	0.436596	Psmb8/Psmb9	2
R-MMU-69615	G1/S DNA Damage Checkpoints	2/105	66/8582	0.193186	0.475583	0.436596	Psmb8/Psmb9	2
R-MMU-8939236	RUNX1 regulates transcription of genes involved in differentiation of HSCs	2/105	66/8582	0.193186	0.475583	0.436596	Psmb8/Psmb9	2
R-MMU-5658442	Regulation of RAS by GAPs	2/105	67/8582	0.197636	0.475583	0.436596	Psmb8/Psmb9	2
R-MMU-174154	APC/C:Cdc20 mediated degradation of Securin	2/105	68/8582	0.2021	0.475583	0.436596	Psmb8/Psmb9	2
R-MMU-8948751	Regulation of PTEN stability and activity	2/105	68/8582	0.2021	0.475583	0.436596	Psmb8/Psmb9	2
R-MMU-68949	Orc1 removal from chromatin	2/105	70/8582	0.211061	0.475583	0.436596	Psmb8/Psmb9	2
R-MMU-69202	Cyclin E associated events during G1/S transition	2/105	70/8582	0.211061	0.475583	0.436596	Psmb8/Psmb9	2
R-MMU-69656	Cyclin A:Cdk2-associated events at S phase entry	2/105	72/8582	0.220062	0.475583	0.436596	Psmb8/Psmb9	2
R-MMU-1474290	Collagen formation	2/105	73/8582	0.224575	0.475583	0.436596	Col7a1/Col13a1	2
R-MMU-174184	Cdc20:Phospho-APC/C mediated degradation of Cyclin A	2/105	73/8582	0.224575	0.475583	0.436596	Psmb8/Psmb9	2
R-MMU-69017	CDK-mediated phosphorylation and removal of Cdc6	2/105	73/8582	0.224575	0.475583	0.436596	Psmb8/Psmb9	2
R-MMU-174178	APC/C:Cdh1 mediated degradation of Cdc20 and other APC/C:Cdh1 targeted proteins in late mitosis/early G1	2/105	74/8582	0.229096	0.475583	0.436596	Psmb8/Psmb9	2
R-MMU-179419	APC:Cdc20 mediated degradation of cell cycle proteins prior to satisfation of the cell cycle checkpoint	2/105	74/8582	0.229096	0.475583	0.436596	Psmb8/Psmb9	2
R-MMU-1168372	Downstream signaling events of B Cell Receptor (BCR)	2/105	75/8582	0.233623	0.475583	0.436596	Psmb8/Psmb9	2
R-MMU-176409	APC/C:Cdc20 mediated degradation of mitotic proteins	2/105	76/8582	0.238155	0.475583	0.436596	Psmb8/Psmb9	2
R-MMU-8878159	Transcriptional regulation by RUNX3	2/105	76/8582	0.238155	0.475583	0.436596	Psmb8/Psmb9	2
R-MMU-176814	Activation of APC/C and APC/C:Cdc20 mediated degradation of mitotic proteins	2/105	77/8582	0.242693	0.475583	0.436596	Psmb8/Psmb9	2
R-MMU-195253	Degradation of beta-catenin by the destruction complex	2/105	77/8582	0.242693	0.475583	0.436596	Psmb8/Psmb9	2
R-MMU-2871837	FCERI mediated NF-kB activation	2/105	77/8582	0.242693	0.475583	0.436596	Psmb8/Psmb9	2
R-MMU-9755511	KEAP1-NFE2L2 pathway	2/105	77/8582	0.242693	0.475583	0.436596	Psmb8/Psmb9	2
R-MMU-168142	Toll Like Receptor 10 (TLR10) Cascade	2/105	78/8582	0.247234	0.475583	0.436596	Usp18/Dusp6	2
R-MMU-168176	Toll Like Receptor 5 (TLR5) Cascade	2/105	78/8582	0.247234	0.475583	0.436596	Usp18/Dusp6	2
R-MMU-975871	MyD88 cascade initiated on plasma membrane	2/105	78/8582	0.247234	0.475583	0.436596	Usp18/Dusp6	2
R-MMU-166058	MyD88:MAL(TIRAP) cascade initiated on plasma membrane	2/105	79/8582	0.251779	0.475583	0.436596	Usp18/Dusp6	2
R-MMU-168179	Toll Like Receptor TLR1:TLR2 Cascade	2/105	79/8582	0.251779	0.475583	0.436596	Usp18/Dusp6	2
R-MMU-168188	Toll Like Receptor TLR6:TLR2 Cascade	2/105	79/8582	0.251779	0.475583	0.436596	Usp18/Dusp6	2
R-MMU-181438	Toll Like Receptor 2 (TLR2) Cascade	2/105	79/8582	0.251779	0.475583	0.436596	Usp18/Dusp6	2
R-MMU-3371378	Regulation by c-FLIP	1/105	10/8582	0.115886	0.475583	0.436596	Tnfsf10	1
R-MMU-5218900	CASP8 activity is inhibited	1/105	10/8582	0.115886	0.475583	0.436596	Tnfsf10	1
R-MMU-69416	Dimerization of procaspase-8	1/105	10/8582	0.115886	0.475583	0.436596	Tnfsf10	1
R-MMU-70635	Urea cycle	1/105	10/8582	0.115886	0.475583	0.436596	Arg1	1
R-MMU-73614	Pyrimidine salvage	1/105	10/8582	0.115886	0.475583	0.436596	Upp1	1
R-MMU-8964058	HDL remodeling	1/105	10/8582	0.115886	0.475583	0.436596	Apoe	1
R-MMU-1296346	Tandem pore domain potassium channels	1/105	11/8582	0.126715	0.475583	0.436596	Kcnk10	1
R-MMU-71240	Tryptophan catabolism	1/105	11/8582	0.126715	0.475583	0.436596	Ido1	1
R-MMU-73621	Pyrimidine catabolism	1/105	11/8582	0.126715	0.475583	0.436596	Upp1	1
R-MMU-74182	Ketone body metabolism	1/105	11/8582	0.126715	0.475583	0.436596	Hmgcll1	1
R-MMU-8963888	Chylomicron assembly	1/105	11/8582	0.126715	0.475583	0.436596	Apoe	1
R-MMU-8963901	Chylomicron remodeling	1/105	11/8582	0.126715	0.475583	0.436596	Apoe	1
R-MMU-1483213	Synthesis of PE	1/105	12/8582	0.137413	0.475583	0.436596	Etnppl	1
R-MMU-174403	Glutathione synthesis and recycling	1/105	12/8582	0.137413	0.475583	0.436596	Chac1	1
R-MMU-202670	ERKs are inactivated	1/105	12/8582	0.137413	0.475583	0.436596	Dusp6	1
R-MMU-75205	Dissolution of Fibrin Clot	1/105	12/8582	0.137413	0.475583	0.436596	S100a10	1
R-MMU-8983432	Interleukin-15 signaling	1/105	12/8582	0.137413	0.475583	0.436596	Il15ra	1
R-MMU-9027276	Erythropoietin activates Phosphoinositide-3-kinase (PI3K)	1/105	12/8582	0.137413	0.475583	0.436596	Pik3r5	1
R-MMU-2046104	alpha-linolenic (omega3) and linoleic (omega6) acid metabolism	1/105	13/8582	0.147982	0.475583	0.436596	Fads2	1
R-MMU-2046106	alpha-linolenic acid (ALA) metabolism	1/105	13/8582	0.147982	0.475583	0.436596	Fads2	1
R-MMU-389948	PD-1 signaling	1/105	13/8582	0.147982	0.475583	0.436596	Cd274	1
R-MMU-1433559	Regulation of KIT signaling	1/105	14/8582	0.158422	0.475583	0.436596	Kit	1
R-MMU-166786	Creation of C4 and C2 activators	1/105	14/8582	0.158422	0.475583	0.436596	C1ra	1
R-MMU-5633008	TP53 Regulates Transcription of Cell Death Genes	1/105	14/8582	0.158422	0.475583	0.436596	Steap3	1
R-MMU-140534	Caspase activation via Death Receptors in the presence of ligand	1/105	15/8582	0.168736	0.475583	0.436596	Tnfsf10	1
R-MMU-399956	CRMPs in Sema3A signaling	1/105	15/8582	0.168736	0.475583	0.436596	Crmp1	1
R-MMU-416993	Trafficking of GluR2-containing AMPA receptors	1/105	15/8582	0.168736	0.475583	0.436596	Gria3	1
R-MMU-9758274	Regulation of NF-kappa B signaling	1/105	15/8582	0.168736	0.475583	0.436596	Usp18	1
R-MMU-190840	Microtubule-dependent trafficking of connexons from Golgi to the plasma membrane	1/105	16/8582	0.178924	0.475583	0.436596	Tubb6	1
R-MMU-189200	Cellular hexose transport	1/105	17/8582	0.188988	0.475583	0.436596	Slc2a10	1
R-MMU-190872	Transport of connexons to the plasma membrane	1/105	17/8582	0.188988	0.475583	0.436596	Tubb6	1
R-MMU-210993	Tie2 Signaling	1/105	17/8582	0.188988	0.475583	0.436596	Angpt1	1
R-MMU-2142845	Hyaluronan metabolism	1/105	17/8582	0.188988	0.475583	0.436596	Cemip	1
R-MMU-5576886	Phase 4 - resting membrane potential	1/105	17/8582	0.188988	0.475583	0.436596	Kcnk10	1
R-MMU-5676594	TNF receptor superfamily (TNFSF) members mediating non-canonical NF-kB pathway	1/105	17/8582	0.188988	0.475583	0.436596	Tnfsf11	1
R-MMU-9006335	Signaling by Erythropoietin	1/105	17/8582	0.188988	0.475583	0.436596	Pik3r5	1
R-MMU-936964	Activation of IRF3 IRF7 mediated by TBK1 IKBKE	1/105	17/8582	0.188988	0.475583	0.436596	Irf7	1
R-MMU-198753	ERK/MAPK targets	1/105	18/8582	0.198931	0.475583	0.436596	Dusp6	1
R-MMU-888590	GABA synthesis release reuptake and degradation	1/105	18/8582	0.198931	0.475583	0.436596	Gad2	1
R-MMU-912694	Regulation of IFNA/IFNB signaling	1/105	18/8582	0.198931	0.475583	0.436596	Usp18	1
R-MMU-445144	Signal transduction by L1	1/105	19/8582	0.208752	0.475583	0.436596	Itga5	1
R-MMU-5357769	Caspase activation via extrinsic apoptotic signalling pathway	1/105	19/8582	0.208752	0.475583	0.436596	Tnfsf10	1
R-MMU-877300	Interferon gamma signaling	1/105	19/8582	0.208752	0.475583	0.436596	Socs3	1
R-MMU-8963898	Plasma lipoprotein assembly	1/105	19/8582	0.208752	0.475583	0.436596	Apoe	1
R-MMU-9705462	Inactivation of CSF3 (G-CSF) signaling	1/105	19/8582	0.208752	0.475583	0.436596	Socs3	1
R-MMU-2453902	The canonical retinoid cycle in rods (twilight vision)	1/105	20/8582	0.218455	0.475583	0.436596	Rbp1	1
R-MMU-140837	Intrinsic Pathway of Fibrin Clot Formation	1/105	21/8582	0.228039	0.475583	0.436596	Serping1	1
R-MMU-5365859	RA biosynthesis pathway	1/105	21/8582	0.228039	0.475583	0.436596	Dhrs3	1
R-MMU-8849932	Synaptic adhesion-like molecules	1/105	21/8582	0.228039	0.475583	0.436596	Gria3	1
R-MMU-9013422	RHOBTB1 GTPase cycle	1/105	21/8582	0.228039	0.475583	0.436596	Rhobtb1	1
R-MMU-112409	RAF-independent MAPK1/3 activation	1/105	22/8582	0.237507	0.475583	0.436596	Dusp6	1
R-MMU-3371571	HSF1-dependent transactivation	1/105	22/8582	0.237507	0.475583	0.436596	Hspb8	1
R-MMU-438066	Unblocking of NMDA receptors glutamate binding and activation	1/105	22/8582	0.237507	0.475583	0.436596	Gria3	1
R-MMU-75876	Synthesis of very long-chain fatty acyl-CoAs	1/105	22/8582	0.237507	0.475583	0.436596	Acsl5	1
R-MMU-5357786	TNFR1-induced proapoptotic signaling	1/105	23/8582	0.24686	0.475583	0.436596	Tnfrsf1a	1
R-MMU-8956321	Nucleotide salvage	1/105	23/8582	0.24686	0.475583	0.436596	Upp1	1
R-MMU-9674555	Signaling by CSF3 (G-CSF)	1/105	23/8582	0.24686	0.475583	0.436596	Socs3	1
R-MMU-5632684	Hedgehog 'on' state	2/105	81/8582	0.260875	0.490395	0.450195	Psmb8/Psmb9	2
R-MMU-68867	Assembly of the pre-replicative complex	2/105	82/8582	0.265425	0.494197	0.453685	Psmb8/Psmb9	2
R-MMU-392451	G beta:gamma signalling through PI3Kgamma	1/105	25/8582	0.265227	0.494197	0.453685	Pik3r5	1
R-MMU-975138	TRAF6 mediated induction of NFkB and MAP kinases upon TLR7/8 or 9 activation	2/105	83/8582	0.269976	0.500287	0.459275	Usp18/Dusp6	2
R-MMU-198725	Nuclear Events (kinase and transcription factor activation)	1/105	26/8582	0.274243	0.503422	0.462154	Dusp6	1
R-MMU-9668328	Sealing of the nuclear envelope (NE) by ESCRT-III	1/105	26/8582	0.274243	0.503422	0.462154	Tubb6	1
R-MMU-8951664	Neddylation	4/105	220/8582	0.282711	0.50734	0.46575	Psmb8/Psmb9/Socs3/Ubd	4
R-MMU-397014	Muscle contraction	3/105	153/8582	0.288143	0.50734	0.46575	Kcnk10/Fxyd1/Fxyd7	3
R-MMU-202424	Downstream TCR signaling	2/105	85/8582	0.279075	0.50734	0.46575	Psmb8/Psmb9	2
R-MMU-174143	APC/C-mediated degradation of cell cycle proteins	2/105	87/8582	0.288168	0.50734	0.46575	Psmb8/Psmb9	2
R-MMU-4086400	PCP/CE pathway	2/105	87/8582	0.288168	0.50734	0.46575	Psmb8/Psmb9	2
R-MMU-453276	Regulation of mitotic cell cycle	2/105	87/8582	0.288168	0.50734	0.46575	Psmb8/Psmb9	2
R-MMU-450282	MAPK targets/ Nuclear events mediated by MAP kinases	1/105	27/8582	0.283149	0.50734	0.46575	Dusp6	1
R-MMU-8955332	Carboxyterminal post-translational modifications of tubulin	1/105	27/8582	0.283149	0.50734	0.46575	Tubb6	1
R-MMU-399719	Trafficking of AMPA receptors	1/105	28/8582	0.291948	0.50734	0.46575	Gria3	1
R-MMU-399721	Glutamate binding activation of AMPA receptors and synaptic plasticity	1/105	28/8582	0.291948	0.50734	0.46575	Gria3	1
R-MMU-8963899	Plasma lipoprotein remodeling	1/105	28/8582	0.291948	0.50734	0.46575	Apoe	1
R-MMU-9634597	GPER1 signaling	1/105	28/8582	0.291948	0.50734	0.46575	Itga5	1
R-MMU-8953897	Cellular responses to stimuli	7/105	443/8582	0.298363	0.516194	0.473878	Cebpb/Mt2/Psmb8/Psmb9/Tubb6/Egln3/Hspb8	7
R-MMU-5607764	CLEC7A (Dectin-1) signaling	2/105	90/8582	0.301783	0.517532	0.475107	Psmb8/Psmb9	2
R-MMU-389661	Glyoxylate metabolism and glycine degradation	1/105	29/8582	0.300639	0.517532	0.475107	Gldc	1
R-MMU-69052	Switching of origins to a post-replicative state	2/105	91/8582	0.306313	0.523007	0.480133	Psmb8/Psmb9	2
R-MMU-1834949	Cytosolic sensors of pathogen-associated DNA	1/105	30/8582	0.309225	0.523406	0.480499	Irf7	1
R-MMU-5626467	RHO GTPases activate IQGAPs	1/105	30/8582	0.309225	0.523406	0.480499	Tubb6	1
R-MMU-4420097	VEGFA-VEGFR2 Pathway	2/105	92/8582	0.310838	0.523869	0.480925	Hspb1/Axl	2
R-MMU-397795	G-protein beta:gamma signalling	1/105	31/8582	0.317706	0.526368	0.483219	Pik3r5	1
R-MMU-5213460	RIPK1-mediated regulated necrosis	1/105	31/8582	0.317706	0.526368	0.483219	Tnfsf10	1
R-MMU-5675482	Regulation of necroptotic cell death	1/105	31/8582	0.317706	0.526368	0.483219	Tnfsf10	1
R-MMU-917977	Transferrin endocytosis and recycling	1/105	31/8582	0.317706	0.526368	0.483219	Steap3	1
R-MMU-168928	DDX58/IFIH1-mediated induction of interferon-alpha/beta	1/105	32/8582	0.326084	0.526854	0.483665	Irf7	1
R-MMU-190861	Gap junction assembly	1/105	32/8582	0.326084	0.526854	0.483665	Tubb6	1
R-MMU-418597	G alpha (z) signalling events	1/105	32/8582	0.326084	0.526854	0.483665	Rgs20	1
R-MMU-5357956	TNFR1-induced NF-kappa-B signaling pathway	1/105	32/8582	0.326084	0.526854	0.483665	Tnfrsf1a	1
R-MMU-5694530	Cargo concentration in the ER	1/105	32/8582	0.326084	0.526854	0.483665	Col7a1	1
R-MMU-9706574	RHOBTB GTPase Cycle	1/105	32/8582	0.326084	0.526854	0.483665	Rhobtb1	1
R-MMU-5689603	UCH proteinases	2/105	96/8582	0.328874	0.529176	0.485797	Psmb8/Psmb9	2
R-MMU-69002	DNA Replication Pre-Initiation	2/105	97/8582	0.333365	0.529291	0.485901	Psmb8/Psmb9	2
R-MMU-1592389	Activation of Matrix Metalloproteinases	1/105	33/8582	0.33436	0.529291	0.485901	Timp1	1
R-MMU-75105	Fatty acyl-CoA biosynthesis	1/105	33/8582	0.33436	0.529291	0.485901	Acsl5	1
R-MMU-8964043	Plasma lipoprotein clearance	1/105	33/8582	0.33436	0.529291	0.485901	Apoe	1
R-MMU-382556	ABC-family proteins mediated transport	2/105	99/8582	0.342321	0.535726	0.491809	Psmb8/Psmb9	2
R-MMU-114604	GPVI-mediated activation cascade	1/105	34/8582	0.342535	0.535726	0.491809	Pik3r5	1
R-MMU-451927	Interleukin-2 family signaling	1/105	34/8582	0.342535	0.535726	0.491809	Il15ra	1
R-MMU-194138	Signaling by VEGF	2/105	100/8582	0.346785	0.537604	0.493534	Hspb1/Axl	2
R-MMU-983705	Signaling by the B Cell Receptor (BCR)	2/105	100/8582	0.346785	0.537604	0.493534	Psmb8/Psmb9	2
R-MMU-437239	Recycling pathway of L1	1/105	35/8582	0.350612	0.537604	0.493534	Tubb6	1
R-MMU-445989	TAK1-dependent IKK and NF-kappa-B activation	1/105	35/8582	0.350612	0.537604	0.493534	Usp18	1
R-MMU-8956319	Nucleotide catabolism	1/105	35/8582	0.350612	0.537604	0.493534	Upp1	1
R-MMU-202403	TCR signaling	2/105	102/8582	0.355685	0.541345	0.496968	Psmb8/Psmb9	2
R-MMU-140877	Formation of Fibrin Clot (Clotting Cascade)	1/105	36/8582	0.358589	0.541345	0.496968	Serping1	1
R-MMU-3928662	EPHB-mediated forward signaling	1/105	36/8582	0.358589	0.541345	0.496968	Sdc2	1
R-MMU-442755	Activation of NMDA receptors and postsynaptic events	1/105	36/8582	0.358589	0.541345	0.496968	Gria3	1
R-MMU-69206	G1/S Transition	2/105	103/8582	0.360119	0.541564	0.497168	Psmb8/Psmb9	2
R-MMU-69275	G2/M Transition	3/105	175/8582	0.362041	0.542368	0.497907	Psmb8/Psmb9/Tubb6	3
R-MMU-156590	Glutathione conjugation	1/105	37/8582	0.36647	0.542764	0.498271	Chac1	1
R-MMU-9035034	RHOF GTPase cycle	1/105	37/8582	0.36647	0.542764	0.498271	Steap3	1
R-MMU-9646399	Aggrephagy	1/105	37/8582	0.36647	0.542764	0.498271	Tubb6	1
R-MMU-453274	Mitotic G2-G2/M phases	3/105	177/8582	0.36874	0.544066	0.499466	Psmb8/Psmb9/Tubb6	3
R-MMU-1433557	Signaling by SCF-KIT	1/105	38/8582	0.374255	0.548066	0.503138	Kit	1
R-MMU-425397	Transport of vitamins nucleosides and related molecules	1/105	38/8582	0.374255	0.548066	0.503138	Slc27a6	1
R-MMU-5689880	Ub-specific processing proteases	3/105	181/8582	0.382103	0.551322	0.506127	Psmb8/Psmb9/Usp18	3
R-MMU-5621481	C-type lectin receptors (CLRs)	2/105	108/8582	0.382118	0.551322	0.506127	Psmb8/Psmb9	2
R-MMU-1566948	Elastic fibre formation	1/105	39/8582	0.381945	0.551322	0.506127	Itga5	1
R-MMU-2559582	Senescence-Associated Secretory Phenotype (SASP)	1/105	39/8582	0.381945	0.551322	0.506127	Cebpb	1
R-MMU-2467813	Separation of Sister Chromatids	3/105	182/8582	0.385435	0.554063	0.508644	Psmb8/Psmb9/Tubb6	3
R-MMU-1296072	Voltage gated Potassium channels	1/105	40/8582	0.389541	0.557914	0.512178	Kcnh8	1
R-MMU-6807070	PTEN Regulation	2/105	111/8582	0.395167	0.56045	0.514506	Psmb8/Psmb9	2
R-MMU-109704	PI3K Cascade	1/105	41/8582	0.397045	0.56045	0.514506	Pde3b	1
R-MMU-190828	Gap junction trafficking	1/105	41/8582	0.397045	0.56045	0.514506	Tubb6	1
R-MMU-5675221	Negative regulation of MAPK pathway	1/105	41/8582	0.397045	0.56045	0.514506	Dusp6	1
R-MMU-112399	IRS-mediated signalling	1/105	42/8582	0.404457	0.564796	0.518496	Pde3b	1
R-MMU-375280	Amine ligand-binding receptors	1/105	42/8582	0.404457	0.564796	0.518496	Gpr143	1
R-MMU-5362517	Signaling by Retinoic Acid	1/105	42/8582	0.404457	0.564796	0.518496	Dhrs3	1
R-MMU-157858	Gap junction trafficking and regulation	1/105	43/8582	0.41178	0.572975	0.526004	Tubb6	1
R-MMU-69239	Synthesis of DNA	2/105	116/8582	0.416636	0.577676	0.530321	Psmb8/Psmb9	2
R-MMU-2454202	Fc epsilon receptor (FCERI) signaling	2/105	118/8582	0.425119	0.586717	0.53862	Psmb8/Psmb9	2
R-MMU-2022090	Assembly of collagen fibrils and other multimeric structures	1/105	45/8582	0.426158	0.586717	0.53862	Col7a1	1
R-MMU-69306	DNA Replication	2/105	123/8582	0.446045	0.588573	0.540324	Psmb8/Psmb9	2
R-MMU-2428928	IRS-related events triggered by IGF1R	1/105	46/8582	0.433216	0.588573	0.540324	Pde3b	1
R-MMU-1660499	Synthesis of PIPs at the plasma membrane	1/105	47/8582	0.440188	0.588573	0.540324	Pik3r5	1
R-MMU-2428924	IGF1R signaling cascade	1/105	47/8582	0.440188	0.588573	0.540324	Pde3b	1
R-MMU-373755	Semaphorin interactions	1/105	47/8582	0.440188	0.588573	0.540324	Crmp1	1
R-MMU-5357905	Regulation of TNFR1 signaling	1/105	47/8582	0.440188	0.588573	0.540324	Tnfrsf1a	1
R-MMU-8848021	Signaling by PTK6	1/105	47/8582	0.440188	0.588573	0.540324	Socs3	1
R-MMU-9006927	Signaling by Non-Receptor Tyrosine Kinases	1/105	47/8582	0.440188	0.588573	0.540324	Socs3	1
R-MMU-112310	Neurotransmitter release cycle	1/105	48/8582	0.447075	0.588573	0.540324	Gad2	1
R-MMU-2404192	Signaling by Type 1 Insulin-like Growth Factor 1 Receptor (IGF1R)	1/105	48/8582	0.447075	0.588573	0.540324	Pde3b	1
R-MMU-6811436	COPI-independent Golgi-to-ER retrograde traffic	1/105	48/8582	0.447075	0.588573	0.540324	Tubb6	1
R-MMU-74751	Insulin receptor signalling cascade	1/105	48/8582	0.447075	0.588573	0.540324	Pde3b	1
R-MMU-9013405	RHOD GTPase cycle	1/105	48/8582	0.447075	0.588573	0.540324	Steap3	1
R-MMU-3858494	Beta-catenin independent WNT signaling	2/105	124/8582	0.450181	0.590673	0.542252	Psmb8/Psmb9	2
R-MMU-2262752	Cellular responses to stress	6/105	440/8582	0.453084	0.592494	0.543924	Cebpb/Psmb8/Psmb9/Tubb6/Egln3/Hspb8	6
R-MMU-453279	Mitotic G1 phase and G1/S transition	2/105	127/8582	0.462483	0.60277	0.553357	Psmb8/Psmb9	2
R-MMU-1266738	Developmental Biology	6/105	447/8582	0.46836	0.604385	0.55484	Itga5/Tubb6/Crmp1/Ppl/Reln/Sdc2	6
R-MMU-3371497	HSP90 chaperone cycle for steroid hormone receptors (SHR) in the presence of ligand	1/105	51/8582	0.467236	0.604385	0.55484	Tubb6	1
R-MMU-5218859	Regulated Necrosis	1/105	51/8582	0.467236	0.604385	0.55484	Tnfsf10	1
R-MMU-983189	Kinesins	1/105	52/8582	0.473793	0.609385	0.55943	Tubb6	1
R-MMU-9013406	RHOQ GTPase cycle	1/105	53/8582	0.480271	0.615691	0.565219	Steap3	1
R-MMU-418555	G alpha (s) signalling events	2/105	132/8582	0.48263	0.616694	0.56614	Itga5/Pde3b	2
R-MMU-425407	SLC-mediated transmembrane transport	3/105	218/8582	0.501419	0.61847	0.56777	Slc10a6/Slc2a10/Slc27a6	3
R-MMU-68882	Mitotic Anaphase	3/105	218/8582	0.501419	0.61847	0.56777	Psmb8/Psmb9/Tubb6	3
R-MMU-8980692	RHOA GTPase cycle	2/105	134/8582	0.49056	0.61847	0.56777	Arhgap28/Fam13a	2
R-MMU-73887	Death Receptor Signaling	2/105	135/8582	0.494497	0.61847	0.56777	Tnfrsf1a/Tnfsf10	2
R-MMU-913709	O-linked glycosylation of mucins	1/105	54/8582	0.486669	0.61847	0.56777	Galnt18	1
R-MMU-448424	Interleukin-17 signaling	1/105	55/8582	0.492989	0.61847	0.56777	Dusp6	1
R-MMU-450294	MAP kinase activation	1/105	55/8582	0.492989	0.61847	0.56777	Dusp6	1
R-MMU-373080	Class B/2 (Secretin family receptors)	1/105	56/8582	0.499232	0.61847	0.56777	Ucn2	1
R-MMU-5620924	Intraflagellar transport	1/105	56/8582	0.499232	0.61847	0.56777	Tubb6	1
R-MMU-75893	TNF signaling	1/105	56/8582	0.499232	0.61847	0.56777	Tnfrsf1a	1
R-MMU-917937	Iron uptake and transport	1/105	56/8582	0.499232	0.61847	0.56777	Steap3	1
R-MMU-2555396	Mitotic Metaphase and Anaphase	3/105	219/8582	0.504495	0.619471	0.568689	Psmb8/Psmb9/Tubb6	3
R-MMU-388841	Costimulation by the CD28 family	1/105	57/8582	0.5054	0.619471	0.568689	Cd274	1
R-MMU-199977	ER to Golgi Anterograde Transport	2/105	143/8582	0.525298	0.63985	0.587397	Col7a1/Tubb6	2
R-MMU-69242	S Phase	2/105	143/8582	0.525298	0.63985	0.587397	Psmb8/Psmb9	2
R-MMU-187037	Signaling by NTRK1 (TRKA)	1/105	62/8582	0.535124	0.649794	0.596526	Dusp6	1
R-MMU-1257604	PIP3 activates AKT signaling	3/105	230/8582	0.537678	0.650873	0.597517	Kit/Psmb8/Psmb9	3
R-MMU-2682334	EPH-Ephrin signaling	1/105	63/8582	0.540854	0.652697	0.599191	Sdc2	1
R-MMU-9006934	Signaling by Receptor Tyrosine Kinases	5/105	400/8582	0.545494	0.653475	0.599906	Hspb1/Kit/Pde3b/Dusp6/Axl	5
R-MMU-174824	Plasma lipoprotein assembly remodeling and clearance	1/105	64/8582	0.546513	0.653475	0.599906	Apoe	1
R-MMU-2995410	Nuclear Envelope (NE) Reassembly	1/105	64/8582	0.546513	0.653475	0.599906	Tubb6	1
R-MMU-201681	TCF dependent signaling in response to WNT	2/105	150/8582	0.55121	0.656146	0.602358	Psmb8/Psmb9	2
R-MMU-9663891	Selective autophagy	1/105	65/8582	0.552103	0.656146	0.602358	Tubb6	1
R-MMU-6794362	Protein-protein interactions at synapses	1/105	66/8582	0.557625	0.660701	0.606539	Gria3	1
R-MMU-204005	COPII-mediated vesicle transport	1/105	68/8582	0.568467	0.671512	0.616464	Col7a1	1
R-MMU-9009391	Extra-nuclear estrogen signaling	1/105	69/8582	0.573789	0.675757	0.620361	Hspb1	1
R-MMU-9711123	Cellular response to chemical stress	2/105	158/8582	0.579603	0.678518	0.622896	Psmb8/Psmb9	2
R-MMU-425366	Transport of bile salts and organic acids metal ions and amine compounds	1/105	70/8582	0.579046	0.678518	0.622896	Slc10a6	1
R-MMU-5688426	Deubiquitination	3/105	246/8582	0.58365	0.679188	0.623511	Psmb8/Psmb9/Usp18	3
R-MMU-69481	G2/M Checkpoints	2/105	159/8582	0.58306	0.679188	0.623511	Psmb8/Psmb9	2
R-MMU-1483255	PI Metabolism	1/105	73/8582	0.594434	0.689685	0.633147	Pik3r5	1
R-MMU-8978868	Fatty acid metabolism	2/105	163/8582	0.59668	0.690242	0.633658	Acsl5/Fads2	2
R-MMU-166520	Signaling by NTRKs	1/105	74/8582	0.599439	0.691388	0.634711	Dusp6	1
R-MMU-74752	Signaling by Insulin receptor	1/105	75/8582	0.604382	0.69504	0.638063	Pde3b	1
R-MMU-9006925	Intracellular signaling by second messengers	3/105	256/8582	0.610898	0.700472	0.64305	Kit/Psmb8/Psmb9	3
R-MMU-983712	Ion channel transport	2/105	169/8582	0.616488	0.704815	0.647037	Fxyd1/Fxyd7	2
R-MMU-948021	Transport to the Golgi and subsequent modification	2/105	171/8582	0.622925	0.708754	0.650654	Col7a1/Tubb6	2
R-MMU-3371556	Cellular response to heat stress	1/105	79/8582	0.623559	0.708754	0.650654	Hspb8	1
R-MMU-71387	Metabolism of carbohydrates	3/105	263/8582	0.629263	0.711103	0.65281	Cemip/Sdc3/Sdc2	3
R-MMU-6809371	Formation of the cornified envelope	1/105	80/8582	0.628207	0.711103	0.65281	Ppl	1
R-MMU-163125	Post-translational modification: synthesis of GPI-anchored proteins	1/105	81/8582	0.632799	0.713039	0.654587	Ly6e	1
R-MMU-380320	Recruitment of NuMA to mitotic centrosomes	1/105	87/8582	0.659193	0.740645	0.67993	Tubb6	1
R-MMU-1483257	Phospholipid metabolism	2/105	187/8582	0.671469	0.750604	0.689073	Pik3r5/Etnppl	2
R-MMU-2559583	Cellular Senescence	1/105	91/8582	0.675736	0.750604	0.689073	Cebpb	1
R-MMU-6807878	COPI-mediated anterograde transport	1/105	91/8582	0.675736	0.750604	0.689073	Tubb6	1
R-MMU-6811434	COPI-dependent Golgi-to-ER retrograde traffic	1/105	91/8582	0.675736	0.750604	0.689073	Tubb6	1
R-MMU-8878171	Transcriptional regulation by RUNX1	2/105	190/8582	0.679994	0.753195	0.691451	Psmb8/Psmb9	2
R-MMU-15869	Metabolism of nucleotides	1/105	94/8582	0.687619	0.759488	0.697228	Upp1	1
R-MMU-156580	Phase II - Conjugation of compounds	1/105	95/8582	0.691483	0.761605	0.699172	Chac1	1
R-MMU-5173105	O-linked glycosylation	1/105	97/8582	0.69907	0.767799	0.704858	Galnt18	1
R-MMU-6811558	PI5P PP2A and IER3 Regulate PI3K/AKT Signaling	1/105	99/8582	0.706472	0.773755	0.710326	Kit	1
R-MMU-109581	Apoptosis	1/105	101/8582	0.713694	0.779481	0.715583	Tnfsf10	1
R-MMU-9012999	RHO GTPase cycle	4/105	395/8582	0.718853	0.782804	0.718632	Arhgap28/Fam13a/Steap3/Rhobtb1	4
R-MMU-2132295	MHC class II antigen presentation	1/105	103/8582	0.72074	0.782804	0.718632	Tubb6	1
R-MMU-9006931	Signaling by Nuclear Receptors	2/105	209/8582	0.729902	0.787372	0.722827	Hspb1/Dhrs3	2
R-MMU-199418	Negative regulation of the PI3K/AKT network	1/105	106/8582	0.730988	0.787372	0.722827	Kit	1
R-MMU-9648025	EML4 and NUDC in mitotic spindle formation	1/105	106/8582	0.730988	0.787372	0.722827	Tubb6	1
R-MMU-1483206	Glycerophospholipid biosynthesis	1/105	115/8582	0.759549	0.815889	0.749006	Etnppl	1
R-MMU-2500257	Resolution of Sister Chromatid Cohesion	1/105	117/8582	0.765476	0.820003	0.752783	Tubb6	1
R-MMU-195721	Signaling by WNT	2/105	229/8582	0.775224	0.823676	0.756154	Psmb8/Psmb9	2
R-MMU-1632852	Macroautophagy	1/105	120/8582	0.774096	0.823676	0.756154	Tubb6	1
R-MMU-9612973	Autophagy	1/105	120/8582	0.774096	0.823676	0.756154	Tubb6	1
R-MMU-983231	Factors involved in megakaryocyte development and platelet production	1/105	122/8582	0.779668	0.826153	0.758428	Tubb6	1
R-MMU-8856688	Golgi-to-ER retrograde transport	1/105	124/8582	0.785104	0.829664	0.761651	Tubb6	1
R-MMU-5663220	RHO GTPases Activate Formins	1/105	131/8582	0.803103	0.846397	0.777013	Tubb6	1
R-MMU-5357801	Programmed Cell Death	1/105	132/8582	0.80555	0.846693	0.777285	Tnfsf10	1
R-MMU-446203	Asparagine N-linked glycosylation	2/105	256/8582	0.825893	0.865748	0.794777	Col7a1/Tubb6	2
R-MMU-6805567	Keratinization	1/105	147/8582	0.83883	0.876958	0.805069	Ppl	1
R-MMU-68886	M Phase	3/105	382/8582	0.852837	0.889225	0.81633	Psmb8/Psmb9/Tubb6	3
R-MMU-69620	Cell Cycle Checkpoints	2/105	277/8582	0.858011	0.89224	0.819098	Psmb8/Psmb9	2
R-MMU-8939211	ESR-mediated signaling	1/105	159/8582	0.861337	0.893323	0.820092	Hspb1	1
R-MMU-73894	DNA Repair	2/105	282/8582	0.864824	0.894567	0.821234	Isg15/Trim25	2
R-MMU-9013149	RAC1 GTPase cycle	1/105	163/8582	0.868124	0.895611	0.822192	Fam13a	1
R-MMU-6811442	Intra-Golgi and retrograde Golgi-to-ER traffic	1/105	179/8582	0.892135	0.91796	0.842709	Tubb6	1
R-MMU-5617833	Cilium Assembly	1/105	185/8582	0.899976	0.923597	0.847884	Tubb6	1
R-MMU-68877	Mitotic Prometaphase	1/105	187/8582	0.902462	0.923724	0.848001	Tubb6	1
R-MMU-416476	G alpha (q) signalling events	1/105	200/8582	0.917194	0.93497	0.858325	Gpr143	1
R-MMU-211859	Biological oxidations	1/105	201/8582	0.918231	0.93497	0.858325	Chac1	1
R-MMU-1852241	Organelle biogenesis and maintenance	1/105	212/8582	0.928826	0.943301	0.865973	Tubb6	1
R-MMU-69278	Cell Cycle Mitotic	3/105	498/8582	0.948029	0.958572	0.879992	Psmb8/Psmb9/Tubb6	3
R-MMU-195258	RHO GTPase Effectors	1/105	238/8582	0.948766	0.958572	0.879992	Tubb6	1
R-MMU-500792	GPCR ligand binding	2/105	394/8582	0.957337	0.96474	0.885654	Ucn2/Gpr143	2
R-MMU-418594	G alpha (i) signalling events	1/105	274/8582	0.967555	0.972529	0.892805	Rgs20	1
R-MMU-3700989	Transcriptional Regulation by TP53	1/105	286/8582	0.97215	0.974643	0.894746	Steap3	1
R-MMU-373076	Class A/1 (Rhodopsin-like receptors)	1/105	307/8582	0.978694	0.978694	0.898464	Gpr143	1

## Sheet: GO_DGEA_MOL56
ID	Description	GeneRatio	BgRatio	pvalue	p.adjust	qvalue	geneID	Count	Significant
R-MMU-1236974	ER-Phagosome pathway	6/81	33/8582	5.29709e-07	0.00016421	0.000145531	H2-M3/H2-Q4/H2-Q7/H2-T23/Tap1/H2-Q6	6	*
R-MMU-983170	Antigen Presentation: Folding assembly and peptide loading of class I MHC	6/81	40/8582	1.74173e-06	0.00018923	0.000167704	H2-M3/H2-Q4/H2-Q7/H2-T23/Tap1/H2-Q6	6	*
R-MMU-1236975	Antigen processing-Cross presentation	8/81	91/8582	2.00011e-06	0.00018923	0.000167704	H2-M3/H2-Q4/H2-Q7/H2-T23/Psmb8/Psmb9/Tap1/H2-Q6	8	*
R-MMU-1236977	Endosomal/Vacuolar pathway	5/81	24/8582	2.44167e-06	0.00018923	0.000167704	H2-M3/H2-Q4/H2-Q7/H2-T23/H2-Q6	5	*
R-MMU-1280215	Cytokine Signaling in Immune system	15/81	447/8582	1.51646e-05	0.000940207	0.000833256	Eif2ak2/Il15ra/Il6ra/Irf9/Isg15/Nlrc5/Oasl1/Psmb8/Psmb9/Socs3/Tnfrsf1a/Tnfsf11/Trim25/Usp18/Tnfrsf1b	15	*
R-MMU-2172127	DAP12 interactions	6/81	61/8582	2.15224e-05	0.00111199	0.000985499	H2-M3/H2-Q4/H2-Q7/H2-T23/Vav3/H2-Q6	6	*
R-MMU-1169408	ISG15 antiviral mechanism	4/81	28/8582	0.00012692	0.00562076	0.00498139	Eif2ak2/Isg15/Trim25/Usp18	4	*
R-MMU-913531	Interferon Signaling	7/81	131/8582	0.00022374	0.00866994	0.00768372	Eif2ak2/Irf9/Isg15/Oasl1/Socs3/Trim25/Usp18	7	*
R-MMU-198933	Immunoregulatory interactions between a Lymphoid and a non-Lymphoid cell	6/81	95/8582	0.000261154	0.00899531	0.00797207	H2-M3/H2-Q4/H2-Q7/H2-T23/Ifitm3/H2-Q6	6	*
R-MMU-8948216	Collagen chain trimerization	4/81	35/8582	0.000308691	0.00956941	0.00848087	Col7a1/Col13a1/Col6a1/Col6a2	4	*
R-MMU-983169	Class I MHC mediated antigen processing & presentation	11/81	342/8582	0.000340439	0.00959418	0.00850282	Dtx3l/H2-M3/H2-Q4/H2-Q7/H2-T23/Herc6/Psmb8/Psmb9/Socs3/Tap1/H2-Q6	11	*
R-MMU-1474228	Degradation of the extracellular matrix	6/81	106/8582	0.000472138	0.0121969	0.0108095	Col7a1/Klk7/Timp1/Col13a1/Col6a1/Col6a2	6	*
R-MMU-5669034	TNFs bind their physiological receptors	3/81	25/8582	0.00160397	0.0360222	0.0319246	Tnfrsf1a/Tnfsf11/Tnfrsf1b	3	*
R-MMU-1169410	Antiviral mechanism by IFN-stimulated genes	5/81	91/8582	0.00163118	0.0360222	0.0319246	Eif2ak2/Isg15/Oasl1/Trim25/Usp18	5	*
R-MMU-1442490	Collagen degradation	4/81	55/8582	0.00174301	0.0360222	0.0319246	Col7a1/Col13a1/Col6a1/Col6a2	4	*
R-MMU-5668541	TNFR2 non-canonical NF-kB pathway	5/81	96/8582	0.00206687	0.0400456	0.0354903	Psmb8/Psmb9/Tnfrsf1a/Tnfsf11/Tnfrsf1b	5	*
R-MMU-1650814	Collagen biosynthesis and modifying enzymes	4/81	60/8582	0.00240494	0.0427115	0.037853	Col7a1/Col13a1/Col6a1/Col6a2	4	*
R-MMU-909733	Interferon alpha/beta signaling	3/81	29/8582	0.00248002	0.0427115	0.037853	Irf9/Socs3/Usp18	3	*
R-MMU-216083	Integrin cell surface interactions	4/81	66/8582	0.00340596	0.055571	0.0492497	Col7a1/Col13a1/Col6a1/Col6a2	4
R-MMU-8957275	Post-translational protein phosphorylation	5/81	114/8582	0.00435186	0.0674538	0.0597808	Apoe/Apol9b/C4b/Shisa5/Timp1	5
R-MMU-1296346	Tandem pore domain potassium channels	2/81	11/8582	0.00457943	0.0676011	0.0599113	Kcnk10/Kcnk2	2
R-MMU-1474290	Collagen formation	4/81	73/8582	0.00489423	0.0689642	0.0611193	Col7a1/Col13a1/Col6a1/Col6a2	4
R-MMU-381426	Regulation of Insulin-like Growth Factor (IGF) transport and uptake by Insulin-like Growth Factor Binding Proteins (IGFBPs)	5/81	120/8582	0.00540748	0.0728834	0.0645927	Apoe/Apol9b/C4b/Shisa5/Timp1	5
R-MMU-9758274	Regulation of NF-kappa B signaling	2/81	15/8582	0.00853138	0.10719	0.0949966	Nlrc5/Usp18	2
R-MMU-2022090	Assembly of collagen fibrils and other multimeric structures	3/81	45/8582	0.00864432	0.10719	0.0949966	Col7a1/Col6a1/Col6a2	3
R-MMU-419037	NCAM1 interactions	2/81	16/8582	0.00969084	0.115545	0.102401	Col6a1/Col6a2	2
R-MMU-5576886	Phase 4 - resting membrane potential	2/81	17/8582	0.0109162	0.125334	0.111077	Kcnk10/Kcnk2	2
R-MMU-197264	Nicotinamide salvaging	2/81	18/8582	0.0122061	0.134046	0.118798	Parp14/Parp9	2
R-MMU-449147	Signaling by Interleukins	7/81	266/8582	0.0125398	0.134046	0.118798	Il15ra/Il6ra/Nlrc5/Psmb8/Psmb9/Socs3/Usp18	7
R-MMU-9020702	Interleukin-1 signaling	4/81	102/8582	0.0155668	0.160857	0.142559	Nlrc5/Psmb8/Psmb9/Usp18	4
R-MMU-6783589	Interleukin-6 family signaling	2/81	22/8582	0.0179859	0.179859	0.1594	Il6ra/Socs3	2
R-MMU-1474244	Extracellular matrix organization	6/81	230/8582	0.0212227	0.205594	0.182208	Col7a1/Klk7/Timp1/Col13a1/Col6a1/Col6a2	6
R-MMU-9833482	PKR-mediated signaling	3/81	64/8582	0.0223444	0.209902	0.186025	Eif2ak2/Isg15/Trim25	3
R-MMU-446652	Interleukin-1 family signaling	4/81	115/8582	0.0231131	0.210737	0.186765	Nlrc5/Psmb8/Psmb9/Usp18	4
R-MMU-114608	Platelet degranulation	4/81	117/8582	0.0244406	0.216474	0.19185	Lgals3bp/Serpina3i/Serping1/Timp1	4
R-MMU-76005	Response to elevated platelet cytosolic Ca2+	4/81	122/8582	0.0279591	0.236314	0.209433	Lgals3bp/Serpina3i/Serping1/Timp1	4
R-MMU-425366	Transport of bile salts and organic acids metal ions and amine compounds	3/81	70/8582	0.0282052	0.236314	0.209433	Slc10a6/Slc39a14/Slc6a7	3
R-MMU-1834949	Cytosolic sensors of pathogen-associated DNA	2/81	30/8582	0.0322678	0.250076	0.221629	Irf7/Trim56	2
R-MMU-196807	Nicotinate metabolism	2/81	30/8582	0.0322678	0.250076	0.221629	Parp14/Parp9	2
R-MMU-5656169	Termination of translesion DNA synthesis	2/81	30/8582	0.0322678	0.250076	0.221629	Isg15/Trim25	2
R-MMU-375165	NCAM signaling for neurite out-growth	2/81	31/8582	0.0342856	0.256895	0.227672	Col6a1/Col6a2	2
R-MMU-168164	Toll Like Receptor 3 (TLR3) Cascade	3/81	76/8582	0.0348051	0.256895	0.227672	Irf7/Nlrc5/Usp18	3
R-MMU-2173782	Binding and Uptake of Ligands by Scavenger Receptors	2/81	33/8582	0.0384642	0.270997	0.240171	Apoe/Apol9b	2
R-MMU-4085001	Sialic acid metabolism	2/81	33/8582	0.0384642	0.270997	0.240171	St8sia5/St3gal1	2
R-MMU-445989	TAK1-dependent IKK and NF-kappa-B activation	2/81	35/8582	0.0428263	0.295025	0.261466	Nlrc5/Usp18	2
R-MMU-975155	MyD88 dependent cascade initiated on endosome	3/81	84/8582	0.0447365	0.297294	0.263476	Irf7/Nlrc5/Usp18	3
R-MMU-977606	Regulation of Complement cascade	2/81	36/8582	0.0450736	0.297294	0.263476	C4b/Serping1	2
R-MMU-168181	Toll Like Receptor 7/8 (TLR7/8) Cascade	3/81	85/8582	0.0460673	0.297518	0.263675	Irf7/Nlrc5/Usp18	3
R-MMU-110313	Translesion synthesis by Y family DNA polymerases bypasses lesions on DNA template	2/81	37/8582	0.0473637	0.299648	0.265562	Isg15/Trim25	2
R-MMU-168138	Toll Like Receptor 9 (TLR9) Cascade	3/81	89/8582	0.0515849	0.319826	0.283445	Irf7/Nlrc5/Usp18	3
R-MMU-3000178	ECM proteoglycans	2/81	42/8582	0.0594231	0.326894	0.289709	Col6a1/Col6a2	2
R-MMU-166166	MyD88-independent TLR4 cascade	3/81	95/8582	0.0604332	0.326894	0.289709	Irf7/Nlrc5/Usp18	3
R-MMU-937061	TRIF(TICAM1)-mediated TLR4 signaling	3/81	95/8582	0.0604332	0.326894	0.289709	Irf7/Nlrc5/Usp18	3
R-MMU-1296071	Potassium Channels	3/81	97/8582	0.0635314	0.326894	0.289709	Kcnk10/Kcnk2/Hcn1	3
R-MMU-166658	Complement cascade	2/81	46/8582	0.0697449	0.326894	0.289709	C4b/Serping1	2
R-MMU-73893	DNA Damage Bypass	2/81	46/8582	0.0697449	0.326894	0.289709	Isg15/Trim25	2
R-MMU-196854	Metabolism of vitamins and cofactors	4/81	169/8582	0.0752928	0.326894	0.289709	Apoe/Folr2/Parp14/Parp9	4
R-MMU-1236978	Cross-presentation of soluble exogenous antigens (endosomes)	2/81	49/8582	0.0778422	0.326894	0.289709	Psmb8/Psmb9	2
R-MMU-186797	Signaling by PDGF	2/81	50/8582	0.0806046	0.326894	0.289709	Col6a1/Col6a2	2
R-MMU-76002	Platelet activation signaling and aggregation	5/81	246/8582	0.0824617	0.326894	0.289709	Lgals3bp/Serpina3i/Serping1/Timp1/Vav3	5
R-MMU-350562	Regulation of ornithine decarboxylase (ODC)	2/81	51/8582	0.0833972	0.326894	0.289709	Psmb8/Psmb9	2
R-MMU-75815	Ubiquitin-dependent degradation of Cyclin D	2/81	51/8582	0.0833972	0.326894	0.289709	Psmb8/Psmb9	2
R-MMU-9762114	GSK3B and BTRC:CUL1-mediated-degradation of NFE2L2	2/81	51/8582	0.0833972	0.326894	0.289709	Psmb8/Psmb9	2
R-MMU-196849	Metabolism of water-soluble vitamins and cofactors	3/81	110/8582	0.085393	0.326894	0.289709	Folr2/Parp14/Parp9	3
R-MMU-349425	Autodegradation of the E3 ubiquitin ligase COP1	2/81	52/8582	0.0862194	0.326894	0.289709	Psmb8/Psmb9	2
R-MMU-69601	Ubiquitin Mediated Degradation of Phosphorylated Cdc25A	2/81	52/8582	0.0862194	0.326894	0.289709	Psmb8/Psmb9	2
R-MMU-69610	p53-Independent DNA Damage Response	2/81	52/8582	0.0862194	0.326894	0.289709	Psmb8/Psmb9	2
R-MMU-69613	p53-Independent G1/S DNA damage checkpoint	2/81	52/8582	0.0862194	0.326894	0.289709	Psmb8/Psmb9	2
R-MMU-8939902	Regulation of RUNX2 expression and activity	2/81	52/8582	0.0862194	0.326894	0.289709	Psmb8/Psmb9	2
R-MMU-166016	Toll Like Receptor 4 (TLR4) Cascade	3/81	111/8582	0.087193	0.326894	0.289709	Irf7/Nlrc5/Usp18	3
R-MMU-8941858	Regulation of RUNX3 expression and activity	2/81	53/8582	0.0890702	0.326894	0.289709	Psmb8/Psmb9	2
R-MMU-3371378	Regulation by c-FLIP	1/81	10/8582	0.0905196	0.326894	0.289709	Tnfsf10	1
R-MMU-5218900	CASP8 activity is inhibited	1/81	10/8582	0.0905196	0.326894	0.289709	Tnfsf10	1
R-MMU-69416	Dimerization of procaspase-8	1/81	10/8582	0.0905196	0.326894	0.289709	Tnfsf10	1
R-MMU-844456	The NLRP3 inflammasome	1/81	10/8582	0.0905196	0.326894	0.289709	Panx1	1
R-MMU-8964058	HDL remodeling	1/81	10/8582	0.0905196	0.326894	0.289709	Apoe	1
R-MMU-9840309	Glycosphingolipid biosynthesis	1/81	10/8582	0.0905196	0.326894	0.289709	B3galnt1	1
R-MMU-8854050	FBXL7 down-regulates AURKA during mitotic entry and in early mitosis	2/81	54/8582	0.0919489	0.326894	0.289709	Psmb8/Psmb9	2
R-MMU-913709	O-linked glycosylation of mucins	2/81	54/8582	0.0919489	0.326894	0.289709	St3gal1/Galnt18	2
R-MMU-4641257	Degradation of AXIN	2/81	55/8582	0.0948548	0.326894	0.289709	Psmb8/Psmb9	2
R-MMU-9759194	Nuclear events mediated by NFE2L2	2/81	55/8582	0.0948548	0.326894	0.289709	Psmb8/Psmb9	2
R-MMU-450408	AUF1 (hnRNP D0) binds and destabilizes mRNA	2/81	56/8582	0.097787	0.326894	0.289709	Psmb8/Psmb9	2
R-MMU-5610780	Degradation of GLI1 by the proteasome	2/81	56/8582	0.097787	0.326894	0.289709	Psmb8/Psmb9	2
R-MMU-69541	Stabilization of p53	2/81	56/8582	0.097787	0.326894	0.289709	Psmb8/Psmb9	2
R-MMU-435354	Zinc transporters	1/81	11/8582	0.0991136	0.326894	0.289709	Slc39a14	1
R-MMU-8963693	Aspartate and asparagine metabolism	1/81	11/8582	0.0991136	0.326894	0.289709	Naalad2	1
R-MMU-8963888	Chylomicron assembly	1/81	11/8582	0.0991136	0.326894	0.289709	Apoe	1
R-MMU-8963901	Chylomicron remodeling	1/81	11/8582	0.0991136	0.326894	0.289709	Apoe	1
R-MMU-2454202	Fc epsilon receptor (FCERI) signaling	3/81	118/8582	0.100236	0.326894	0.289709	Psmb8/Psmb9/Vav3	3
R-MMU-4641258	Degradation of DVL	2/81	57/8582	0.100745	0.326894	0.289709	Psmb8/Psmb9	2
R-MMU-5607761	Dectin-1 mediated noncanonical NF-kB signaling	2/81	57/8582	0.100745	0.326894	0.289709	Psmb8/Psmb9	2
R-MMU-5610785	GLI3 is processed to GLI3R by the proteasome	2/81	57/8582	0.100745	0.326894	0.289709	Psmb8/Psmb9	2
R-MMU-5676590	NIK-->noncanonical NF-kB signaling	2/81	57/8582	0.100745	0.326894	0.289709	Psmb8/Psmb9	2
R-MMU-1630316	Glycosaminoglycan metabolism	3/81	119/8582	0.102161	0.326894	0.289709	Ndst4/Papss2/St3gal1	3
R-MMU-351202	Metabolism of polyamines	2/81	59/8582	0.106735	0.326894	0.289709	Psmb8/Psmb9	2
R-MMU-1483213	Synthesis of PE	1/81	12/8582	0.107627	0.326894	0.289709	Etnppl	1
R-MMU-3134975	Regulation of innate immune responses to cytosolic DNA	1/81	12/8582	0.107627	0.326894	0.289709	Trim56	1
R-MMU-8983432	Interleukin-15 signaling	1/81	12/8582	0.107627	0.326894	0.289709	Il15ra	1
R-MMU-187577	SCF(Skp2)-mediated degradation of p27/p21	2/81	60/8582	0.109765	0.326894	0.289709	Psmb8/Psmb9	2
R-MMU-446219	Synthesis of substrates in N-glycan biosythesis	2/81	61/8582	0.112819	0.326894	0.289709	St8sia5/St3gal1	2
R-MMU-4608870	Asymmetric localization of PCP proteins	2/81	62/8582	0.115894	0.326894	0.289709	Psmb8/Psmb9	2
R-MMU-389948	PD-1 signaling	1/81	13/8582	0.116062	0.326894	0.289709	Cd274	1
R-MMU-75109	Triglyceride biosynthesis	1/81	13/8582	0.116062	0.326894	0.289709	Agmo	1
R-MMU-1169091	Activation of NF-kappaB in B cells	2/81	63/8582	0.118991	0.326894	0.289709	Psmb8/Psmb9	2
R-MMU-5358346	Hedgehog ligand biogenesis	2/81	63/8582	0.118991	0.326894	0.289709	Psmb8/Psmb9	2
R-MMU-8878166	Transcriptional regulation by RUNX2	2/81	63/8582	0.118991	0.326894	0.289709	Psmb8/Psmb9	2
R-MMU-211859	Biological oxidations	4/81	201/8582	0.121641	0.326894	0.289709	Mgst2/Papss2/Maob/Aldh1b1	4
R-MMU-174084	Autodegradation of Cdh1 by Cdh1:APC/C	2/81	64/8582	0.122109	0.326894	0.289709	Psmb8/Psmb9	2
R-MMU-69563	p53-Dependent G1 DNA Damage Response	2/81	64/8582	0.122109	0.326894	0.289709	Psmb8/Psmb9	2
R-MMU-69580	p53-Dependent G1/S DNA damage checkpoint	2/81	64/8582	0.122109	0.326894	0.289709	Psmb8/Psmb9	2
R-MMU-622312	Inflammasomes	1/81	14/8582	0.124417	0.326894	0.289709	Panx1	1
R-MMU-1234176	Oxygen-dependent proline hydroxylation of Hypoxia-inducible Factor Alpha	2/81	66/8582	0.128404	0.326894	0.289709	Psmb8/Psmb9	2
R-MMU-69615	G1/S DNA Damage Checkpoints	2/81	66/8582	0.128404	0.326894	0.289709	Psmb8/Psmb9	2
R-MMU-8939236	RUNX1 regulates transcription of genes involved in differentiation of HSCs	2/81	66/8582	0.128404	0.326894	0.289709	Psmb8/Psmb9	2
R-MMU-983168	Antigen processing: Ubiquitination & Proteasome degradation	5/81	285/8582	0.131343	0.326894	0.289709	Dtx3l/Herc6/Psmb8/Psmb9/Socs3	5
R-MMU-5658442	Regulation of RAS by GAPs	2/81	67/8582	0.13158	0.326894	0.289709	Psmb8/Psmb9	2
R-MMU-140534	Caspase activation via Death Receptors in the presence of ligand	1/81	15/8582	0.132695	0.326894	0.289709	Tnfsf10	1
R-MMU-156584	Cytosolic sulfonation of small molecules	1/81	15/8582	0.132695	0.326894	0.289709	Papss2	1
R-MMU-399956	CRMPs in Sema3A signaling	1/81	15/8582	0.132695	0.326894	0.289709	Crmp1	1
R-MMU-8980692	RHOA GTPase cycle	3/81	134/8582	0.132721	0.326894	0.289709	Fam13a/Vav3/Arhgap44	3
R-MMU-174154	APC/C:Cdc20 mediated degradation of Securin	2/81	68/8582	0.134774	0.326894	0.289709	Psmb8/Psmb9	2
R-MMU-8948751	Regulation of PTEN stability and activity	2/81	68/8582	0.134774	0.326894	0.289709	Psmb8/Psmb9	2
R-MMU-73887	Death Receptor Signaling	3/81	135/8582	0.134863	0.326894	0.289709	Tnfrsf1a/Vav3/Tnfsf10	3
R-MMU-196757	Metabolism of folate and pterines	1/81	16/8582	0.140895	0.326894	0.289709	Folr2	1
R-MMU-977068	Termination of O-glycan biosynthesis	1/81	16/8582	0.140895	0.326894	0.289709	St3gal1	1
R-MMU-1234174	Cellular response to hypoxia	2/81	70/8582	0.141214	0.326894	0.289709	Psmb8/Psmb9	2
R-MMU-68949	Orc1 removal from chromatin	2/81	70/8582	0.141214	0.326894	0.289709	Psmb8/Psmb9	2
R-MMU-69202	Cyclin E associated events during G1/S transition	2/81	70/8582	0.141214	0.326894	0.289709	Psmb8/Psmb9	2
R-MMU-168898	Toll-like Receptor Cascades	3/81	139/8582	0.143551	0.326894	0.289709	Irf7/Nlrc5/Usp18	3
R-MMU-446193	Biosynthesis of the N-glycan precursor (dolichol lipid-linked oligosaccharide LLO) and transfer to a nascent protein	2/81	71/8582	0.14446	0.326894	0.289709	St8sia5/St3gal1	2
R-MMU-69656	Cyclin A:Cdk2-associated events at S phase entry	2/81	72/8582	0.147721	0.326894	0.289709	Psmb8/Psmb9	2
R-MMU-442660	Na+/Cl- dependent neurotransmitter transporters	1/81	17/8582	0.149019	0.326894	0.289709	Slc6a7	1
R-MMU-5676594	TNF receptor superfamily (TNFSF) members mediating non-canonical NF-kB pathway	1/81	17/8582	0.149019	0.326894	0.289709	Tnfsf11	1
R-MMU-9018677	Biosynthesis of DHA-derived SPMs	1/81	17/8582	0.149019	0.326894	0.289709	Hpgd	1
R-MMU-936964	Activation of IRF3 IRF7 mediated by TBK1 IKBKE	1/81	17/8582	0.149019	0.326894	0.289709	Irf7	1
R-MMU-174184	Cdc20:Phospho-APC/C mediated degradation of Cyclin A	2/81	73/8582	0.150997	0.326894	0.289709	Psmb8/Psmb9	2
R-MMU-5687128	MAPK6/MAPK4 signaling	2/81	73/8582	0.150997	0.326894	0.289709	Psmb8/Psmb9	2
R-MMU-69017	CDK-mediated phosphorylation and removal of Cdc6	2/81	73/8582	0.150997	0.326894	0.289709	Psmb8/Psmb9	2
R-MMU-174178	APC/C:Cdh1 mediated degradation of Cdc20 and other APC/C:Cdh1 targeted proteins in late mitosis/early G1	2/81	74/8582	0.154288	0.326894	0.289709	Psmb8/Psmb9	2
R-MMU-179419	APC:Cdc20 mediated degradation of cell cycle proteins prior to satisfation of the cell cycle checkpoint	2/81	74/8582	0.154288	0.326894	0.289709	Psmb8/Psmb9	2
R-MMU-9018678	Biosynthesis of specialized proresolving mediators (SPMs)	1/81	18/8582	0.157067	0.326894	0.289709	Hpgd	1
R-MMU-912694	Regulation of IFNA/IFNB signaling	1/81	18/8582	0.157067	0.326894	0.289709	Usp18	1
R-MMU-1168372	Downstream signaling events of B Cell Receptor (BCR)	2/81	75/8582	0.157593	0.326894	0.289709	Psmb8/Psmb9	2
R-MMU-8852276	The role of GTSE1 in G2/M progression after G2 checkpoint	2/81	75/8582	0.157593	0.326894	0.289709	Psmb8/Psmb9	2
R-MMU-176409	APC/C:Cdc20 mediated degradation of mitotic proteins	2/81	76/8582	0.160912	0.326894	0.289709	Psmb8/Psmb9	2
R-MMU-8878159	Transcriptional regulation by RUNX3	2/81	76/8582	0.160912	0.326894	0.289709	Psmb8/Psmb9	2
R-MMU-176814	Activation of APC/C and APC/C:Cdc20 mediated degradation of mitotic proteins	2/81	77/8582	0.164243	0.326894	0.289709	Psmb8/Psmb9	2
R-MMU-195253	Degradation of beta-catenin by the destruction complex	2/81	77/8582	0.164243	0.326894	0.289709	Psmb8/Psmb9	2
R-MMU-2871837	FCERI mediated NF-kB activation	2/81	77/8582	0.164243	0.326894	0.289709	Psmb8/Psmb9	2
R-MMU-9755511	KEAP1-NFE2L2 pathway	2/81	77/8582	0.164243	0.326894	0.289709	Psmb8/Psmb9	2
R-MMU-5357769	Caspase activation via extrinsic apoptotic signalling pathway	1/81	19/8582	0.165039	0.326894	0.289709	Tnfsf10	1
R-MMU-877300	Interferon gamma signaling	1/81	19/8582	0.165039	0.326894	0.289709	Socs3	1
R-MMU-8963898	Plasma lipoprotein assembly	1/81	19/8582	0.165039	0.326894	0.289709	Apoe	1
R-MMU-9705462	Inactivation of CSF3 (G-CSF) signaling	1/81	19/8582	0.165039	0.326894	0.289709	Socs3	1
R-MMU-168142	Toll Like Receptor 10 (TLR10) Cascade	2/81	78/8582	0.167587	0.326894	0.289709	Nlrc5/Usp18	2
R-MMU-168176	Toll Like Receptor 5 (TLR5) Cascade	2/81	78/8582	0.167587	0.326894	0.289709	Nlrc5/Usp18	2
R-MMU-975871	MyD88 cascade initiated on plasma membrane	2/81	78/8582	0.167587	0.326894	0.289709	Nlrc5/Usp18	2
R-MMU-166058	MyD88:MAL(TIRAP) cascade initiated on plasma membrane	2/81	79/8582	0.170943	0.326894	0.289709	Nlrc5/Usp18	2
R-MMU-168179	Toll Like Receptor TLR1:TLR2 Cascade	2/81	79/8582	0.170943	0.326894	0.289709	Nlrc5/Usp18	2
R-MMU-168188	Toll Like Receptor TLR6:TLR2 Cascade	2/81	79/8582	0.170943	0.326894	0.289709	Nlrc5/Usp18	2
R-MMU-181438	Toll Like Receptor 2 (TLR2) Cascade	2/81	79/8582	0.170943	0.326894	0.289709	Nlrc5/Usp18	2
R-MMU-166663	Initial triggering of complement	1/81	20/8582	0.172937	0.326894	0.289709	C4b	1
R-MMU-425410	Metal ion SLC transporters	1/81	20/8582	0.172937	0.326894	0.289709	Slc39a14	1
R-MMU-5423646	Aflatoxin activation and detoxification	1/81	20/8582	0.172937	0.326894	0.289709	Mgst2	1
R-MMU-163125	Post-translational modification: synthesis of GPI-anchored proteins	2/81	81/8582	0.177689	0.331829	0.294083	Folr2/Ly6e	2
R-MMU-5632684	Hedgehog 'on' state	2/81	81/8582	0.177689	0.331829	0.294083	Psmb8/Psmb9	2
R-MMU-140837	Intrinsic Pathway of Fibrin Clot Formation	1/81	21/8582	0.180762	0.333937	0.295951	Serping1	1
R-MMU-68867	Assembly of the pre-replicative complex	2/81	82/8582	0.181078	0.333937	0.295951	Psmb8/Psmb9	2
R-MMU-975138	TRAF6 mediated induction of NFkB and MAP kinases upon TLR7/8 or 9 activation	2/81	83/8582	0.184477	0.333937	0.295951	Nlrc5/Usp18	2
R-MMU-9711123	Cellular response to chemical stress	3/81	158/8582	0.187133	0.333937	0.295951	Psmb8/Psmb9/Nox4	3
R-MMU-9013148	CDC42 GTPase cycle	2/81	84/8582	0.187885	0.333937	0.295951	Vav3/Arhgap44	2
R-MMU-112409	RAF-independent MAPK1/3 activation	1/81	22/8582	0.188513	0.333937	0.295951	Il6ra	1
R-MMU-2168880	Scavenging of heme from plasma	1/81	22/8582	0.188513	0.333937	0.295951	Apol9b	1
R-MMU-3371571	HSF1-dependent transactivation	1/81	22/8582	0.188513	0.333937	0.295951	Hspb8	1
R-MMU-75876	Synthesis of very long-chain fatty acyl-CoAs	1/81	22/8582	0.188513	0.333937	0.295951	Acsl5	1
R-MMU-202424	Downstream TCR signaling	2/81	85/8582	0.191303	0.33505	0.296937	Psmb8/Psmb9	2
R-MMU-450531	Regulation of mRNA stability by proteins that bind AU-rich elements	2/81	85/8582	0.191303	0.33505	0.296937	Psmb8/Psmb9	2
R-MMU-5357786	TNFR1-induced proapoptotic signaling	1/81	23/8582	0.196192	0.337341	0.298968	Tnfrsf1a	1
R-MMU-9674555	Signaling by CSF3 (G-CSF)	1/81	23/8582	0.196192	0.337341	0.298968	Socs3	1
R-MMU-174143	APC/C-mediated degradation of cell cycle proteins	2/81	87/8582	0.198162	0.337341	0.298968	Psmb8/Psmb9	2
R-MMU-4086400	PCP/CE pathway	2/81	87/8582	0.198162	0.337341	0.298968	Psmb8/Psmb9	2
R-MMU-453276	Regulation of mitotic cell cycle	2/81	87/8582	0.198162	0.337341	0.298968	Psmb8/Psmb9	2
R-MMU-9013149	RAC1 GTPase cycle	3/81	163/8582	0.19914	0.337341	0.298968	Fam13a/Vav3/Arhgap44	3
R-MMU-8979227	Triglyceride metabolism	1/81	24/8582	0.203799	0.343357	0.304299	Agmo	1
R-MMU-422475	Axon guidance	4/81	249/8582	0.208247	0.345655	0.306336	Vav3/Col6a1/Col6a2/Crmp1	4
R-MMU-71291	Metabolism of amino acids and derivatives	4/81	249/8582	0.208247	0.345655	0.306336	Psmb8/Psmb9/Naalad2/Slc6a7	4
R-MMU-5607764	CLEC7A (Dectin-1) signaling	2/81	90/8582	0.208508	0.345655	0.306336	Psmb8/Psmb9	2
R-MMU-9675108	Nervous system development	4/81	250/8582	0.210219	0.346638	0.307207	Vav3/Col6a1/Col6a2/Crmp1	4
R-MMU-69052	Switching of origins to a post-replicative state	2/81	91/8582	0.21197	0.347675	0.308127	Psmb8/Psmb9	2
R-MMU-9748787	Azathioprine ADME	1/81	26/8582	0.2188	0.35699	0.316381	Vav3	1
R-MMU-156580	Phase II - Conjugation of compounds	2/81	95/8582	0.225872	0.363778	0.322398	Mgst2/Papss2	2
R-MMU-2022854	Keratan sulfate biosynthesis	1/81	27/8582	0.226196	0.363778	0.322398	St3gal1	1
R-MMU-5689603	UCH proteinases	2/81	96/8582	0.229359	0.363778	0.322398	Psmb8/Psmb9	2
R-MMU-5173105	O-linked glycosylation	2/81	97/8582	0.23285	0.363778	0.322398	St3gal1/Galnt18	2
R-MMU-69002	DNA Replication Pre-Initiation	2/81	97/8582	0.23285	0.363778	0.322398	Psmb8/Psmb9	2
R-MMU-2022928	HS-GAG biosynthesis	1/81	28/8582	0.233522	0.363778	0.322398	Ndst4	1
R-MMU-2871809	FCERI mediated Ca+2 mobilization	1/81	28/8582	0.233522	0.363778	0.322398	Vav3	1
R-MMU-5218920	VEGFR2 mediated vascular permeability	1/81	28/8582	0.233522	0.363778	0.322398	Vav3	1
R-MMU-8963899	Plasma lipoprotein remodeling	1/81	28/8582	0.233522	0.363778	0.322398	Apoe	1
R-MMU-5576891	Cardiac conduction	2/81	98/8582	0.236345	0.366334	0.324663	Kcnk10/Kcnk2	2
R-MMU-382556	ABC-family proteins mediated transport	2/81	99/8582	0.239843	0.369514	0.327481	Psmb8/Psmb9	2
R-MMU-2424491	DAP12 signaling	1/81	29/8582	0.24078	0.369514	0.327481	Vav3	1
R-MMU-983705	Signaling by the B Cell Receptor (BCR)	2/81	100/8582	0.243343	0.370396	0.328263	Psmb8/Psmb9	2
R-MMU-5689880	Ub-specific processing proteases	3/81	181/8582	0.243744	0.370396	0.328263	Psmb8/Psmb9/Usp18	3
R-MMU-211945	Phase I - Functionalization of compounds	2/81	101/8582	0.246846	0.373159	0.330712	Maob/Aldh1b1	2
R-MMU-2871796	FCERI mediated MAPK activation	1/81	30/8582	0.24797	0.373159	0.330712	Vav3	1
R-MMU-202403	TCR signaling	2/81	102/8582	0.250351	0.374922	0.332274	Psmb8/Psmb9	2
R-MMU-69206	G1/S Transition	2/81	103/8582	0.253858	0.376566	0.333731	Psmb8/Psmb9	2
R-MMU-5213460	RIPK1-mediated regulated necrosis	1/81	31/8582	0.255093	0.376566	0.333731	Tnfsf10	1
R-MMU-5675482	Regulation of necroptotic cell death	1/81	31/8582	0.255093	0.376566	0.333731	Tnfsf10	1
R-MMU-168928	DDX58/IFIH1-mediated induction of interferon-alpha/beta	1/81	32/8582	0.262149	0.379242	0.336103	Irf7	1
R-MMU-418597	G alpha (z) signalling events	1/81	32/8582	0.262149	0.379242	0.336103	Rgs20	1
R-MMU-5357956	TNFR1-induced NF-kappa-B signaling pathway	1/81	32/8582	0.262149	0.379242	0.336103	Tnfrsf1a	1
R-MMU-5694530	Cargo concentration in the ER	1/81	32/8582	0.262149	0.379242	0.336103	Col7a1	1
R-MMU-5610787	Hedgehog 'off' state	2/81	106/8582	0.264385	0.379242	0.336103	Psmb8/Psmb9	2
R-MMU-1592389	Activation of Matrix Metalloproteinases	1/81	33/8582	0.26914	0.379242	0.336103	Timp1	1
R-MMU-3299685	Detoxification of Reactive Oxygen Species	1/81	33/8582	0.26914	0.379242	0.336103	Nox4	1
R-MMU-3928665	EPH-ephrin mediated repulsion of cells	1/81	33/8582	0.26914	0.379242	0.336103	Vav3	1
R-MMU-75105	Fatty acyl-CoA biosynthesis	1/81	33/8582	0.26914	0.379242	0.336103	Acsl5	1
R-MMU-8964043	Plasma lipoprotein clearance	1/81	33/8582	0.26914	0.379242	0.336103	Apoe	1
R-MMU-5621481	C-type lectin receptors (CLRs)	2/81	108/8582	0.271406	0.380705	0.337399	Psmb8/Psmb9	2
R-MMU-114604	GPVI-mediated activation cascade	1/81	34/8582	0.276064	0.383767	0.340112	Vav3	1
R-MMU-451927	Interleukin-2 family signaling	1/81	34/8582	0.276064	0.383767	0.340112	Il15ra	1
R-MMU-6807070	PTEN Regulation	2/81	111/8582	0.281935	0.389807	0.345465	Psmb8/Psmb9	2
R-MMU-1638074	Keratan sulfate/keratin metabolism	1/81	35/8582	0.282924	0.389807	0.345465	St3gal1	1
R-MMU-140877	Formation of Fibrin Clot (Clotting Cascade)	1/81	36/8582	0.28972	0.397404	0.352198	Serping1	1
R-MMU-156590	Glutathione conjugation	1/81	37/8582	0.296452	0.403071	0.357221	Mgst2	1
R-MMU-6814122	Cooperation of PDCL (PhLP1) and TRiC/CCT in G-protein beta folding	1/81	37/8582	0.296452	0.403071	0.357221	Rgs7	1
R-MMU-69239	Synthesis of DNA	2/81	116/8582	0.299457	0.405378	0.359265	Psmb8/Psmb9	2
R-MMU-390466	Chaperonin-mediated protein folding	1/81	38/8582	0.303121	0.406786	0.360513	Rgs7	1
R-MMU-391251	Protein folding	1/81	38/8582	0.303121	0.406786	0.360513	Rgs7	1
R-MMU-2559582	Senescence-Associated Secretory Phenotype (SASP)	1/81	39/8582	0.309728	0.41386	0.366783	Cebpb	1
R-MMU-9696264	RND3 GTPase cycle	1/81	40/8582	0.316273	0.420792	0.372926	Sema4f	1
R-MMU-1660662	Glycosphingolipid metabolism	1/81	41/8582	0.322756	0.427239	0.37864	B3galnt1	1
R-MMU-69306	DNA Replication	2/81	123/8582	0.323875	0.427239	0.37864	Psmb8/Psmb9	2
R-MMU-3858494	Beta-catenin independent WNT signaling	2/81	124/8582	0.327348	0.429991	0.381079	Psmb8/Psmb9	2
R-MMU-975634	Retinoid metabolism and transport	1/81	42/8582	0.329179	0.430571	0.381593	Apoe	1
R-MMU-453279	Mitotic G1 phase and G1/S transition	2/81	127/8582	0.337741	0.439872	0.389835	Psmb8/Psmb9	2
R-MMU-425407	SLC-mediated transmembrane transport	3/81	218/8582	0.339127	0.439872	0.389835	Slc10a6/Slc39a14/Slc6a7	3
R-MMU-168643	Nucleotide-binding domain leucine rich repeat containing receptor (NLR) signaling pathways	1/81	44/8582	0.341844	0.441549	0.391322	Panx1	1
R-MMU-8951664	Neddylation	3/81	220/8582	0.344323	0.442905	0.392524	Psmb8/Psmb9/Socs3	3
R-MMU-6806667	Metabolism of fat-soluble vitamins	1/81	46/8582	0.354274	0.453822	0.402199	Apoe	1
R-MMU-373755	Semaphorin interactions	1/81	47/8582	0.360401	0.454164	0.402502	Crmp1	1
R-MMU-5357905	Regulation of TNFR1 signaling	1/81	47/8582	0.360401	0.454164	0.402502	Tnfrsf1a	1
R-MMU-8848021	Signaling by PTK6	1/81	47/8582	0.360401	0.454164	0.402502	Socs3	1
R-MMU-9006927	Signaling by Non-Receptor Tyrosine Kinases	1/81	47/8582	0.360401	0.454164	0.402502	Socs3	1
R-MMU-112316	Neuronal System	4/81	323/8582	0.363847	0.45665	0.404705	Kcnk10/Kcnk2/Panx1/Hcn1	4
R-MMU-193648	NRAGE signals death through JNK	1/81	48/8582	0.366471	0.458089	0.40598	Vav3	1
R-MMU-5358351	Signaling by Hedgehog	2/81	138/8582	0.37541	0.467378	0.414212	Psmb8/Psmb9	2
R-MMU-5218859	Regulated Necrosis	1/81	51/8582	0.384342	0.476584	0.422372	Tnfsf10	1
R-MMU-1638091	Heparan sulfate/heparin (HS-GAG) metabolism	1/81	52/8582	0.390187	0.481905	0.427087	Ndst4	1
R-MMU-69242	S Phase	2/81	143/8582	0.392258	0.48254	0.42765	Psmb8/Psmb9	2
R-MMU-2262752	Cellular responses to stress	5/81	440/8582	0.401848	0.492383	0.436373	Cebpb/Hspb8/Psmb8/Psmb9/Nox4	5
R-MMU-2029482	Regulation of actin dynamics for phagocytic cup formation	1/81	55/8582	0.407397	0.495441	0.439083	Vav3	1
R-MMU-8953897	Cellular responses to stimuli	5/81	443/8582	0.40754	0.495441	0.439083	Cebpb/Hspb8/Psmb8/Psmb9/Nox4	5
R-MMU-5688426	Deubiquitination	3/81	246/8582	0.411346	0.496272	0.43982	Psmb8/Psmb9/Usp18	3
R-MMU-373080	Class B/2 (Secretin family receptors)	1/81	56/8582	0.413026	0.496272	0.43982	Ucn2	1
R-MMU-75893	TNF signaling	1/81	56/8582	0.413026	0.496272	0.43982	Tnfrsf1a	1
R-MMU-201681	TCF dependent signaling in response to WNT	2/81	150/8582	0.415507	0.497325	0.440753	Psmb8/Psmb9	2
R-MMU-388841	Costimulation by the CD28 family	1/81	57/8582	0.418603	0.499103	0.442329	Cd274	1
R-MMU-397014	Muscle contraction	2/81	153/8582	0.425338	0.505191	0.447725	Kcnk10/Kcnk2	2
R-MMU-446203	Asparagine N-linked glycosylation	3/81	256/8582	0.436645	0.516641	0.457872	Col7a1/St8sia5/St3gal1	3
R-MMU-69481	G2/M Checkpoints	2/81	159/8582	0.444747	0.524227	0.464595	Psmb8/Psmb9	2
R-MMU-2682334	EPH-Ephrin signaling	1/81	63/8582	0.45098	0.529559	0.469321	Vav3	1
R-MMU-71387	Metabolism of carbohydrates	3/81	263/8582	0.454124	0.531239	0.47081	Ndst4/Papss2/St3gal1	3
R-MMU-174824	Plasma lipoprotein assembly remodeling and clearance	1/81	64/8582	0.4562	0.531661	0.471184	Apoe	1
R-MMU-5684996	MAPK1/MAPK3 signaling	3/81	268/8582	0.466478	0.539601	0.47822	Il6ra/Psmb8/Psmb9	3
R-MMU-204998	Cell death signalling via NRAGE NRIF and NADE	1/81	66/8582	0.466493	0.539601	0.47822	Vav3	1
R-MMU-204005	COPII-mediated vesicle transport	1/81	68/8582	0.476595	0.549235	0.486759	Col7a1	1
R-MMU-9013408	RHOG GTPase cycle	1/81	69/8582	0.481574	0.552918	0.490023	Vav3	1
R-MMU-416482	G alpha (12/13) signalling events	1/81	71/8582	0.491393	0.56211	0.498169	Vav3	1
R-MMU-69275	G2/M Transition	2/81	175/8582	0.494695	0.563807	0.499673	Psmb8/Psmb9	2
R-MMU-109582	Hemostasis	5/81	492/8582	0.499008	0.566533	0.502089	Lgals3bp/Serpina3i/Serping1/Timp1/Vav3	5
R-MMU-453274	Mitotic G2-G2/M phases	2/81	177/8582	0.500742	0.566533	0.502089	Psmb8/Psmb9	2
R-MMU-2029480	Fcgamma receptor (FCGR) dependent phagocytosis	1/81	75/8582	0.510484	0.575454	0.509995	Vav3	1
R-MMU-2467813	Separation of Sister Chromatids	2/81	182/8582	0.515659	0.577427	0.511744	Psmb8/Psmb9	2
R-MMU-9012999	RHO GTPase cycle	4/81	395/8582	0.515959	0.577427	0.511744	Fam13a/Vav3/Sema4f/Arhgap44	4
R-MMU-5683057	MAPK family signaling cascades	3/81	291/8582	0.521662	0.58171	0.515539	Il6ra/Psmb8/Psmb9	3
R-MMU-428157	Sphingolipid metabolism	1/81	78/8582	0.524336	0.582595	0.516324	B3galnt1	1
R-MMU-3371556	Cellular response to heat stress	1/81	79/8582	0.528866	0.585531	0.518925	Hspb8	1
R-MMU-193704	p75 NTR receptor-mediated signalling	1/81	81/8582	0.5378	0.590335	0.523183	Vav3	1
R-MMU-9013404	RAC2 GTPase cycle	1/81	81/8582	0.5378	0.590335	0.523183	Vav3	1
R-MMU-8878171	Transcriptional regulation by RUNX1	2/81	190/8582	0.538918	0.590335	0.523183	Psmb8/Psmb9	2
R-MMU-2187338	Visual phototransduction	1/81	89/8582	0.571893	0.624249	0.553239	Apoe	1
R-MMU-2559583	Cellular Senescence	1/81	91/8582	0.58002	0.630899	0.559133	Cebpb	1
R-MMU-4420097	VEGFA-VEGFR2 Pathway	1/81	92/8582	0.584027	0.633036	0.561027	Vav3	1
R-MMU-9748784	Drug ADME	1/81	98/8582	0.607284	0.655952	0.581336	Vav3	1
R-MMU-68882	Mitotic Anaphase	2/81	218/8582	0.614229	0.656549	0.581865	Psmb8/Psmb9	2
R-MMU-194138	Signaling by VEGF	1/81	100/8582	0.614748	0.656549	0.581865	Vav3	1
R-MMU-1266738	Developmental Biology	4/81	447/8582	0.615158	0.656549	0.581865	Vav3/Col6a1/Col6a2/Crmp1	4
R-MMU-2555396	Mitotic Metaphase and Anaphase	2/81	219/8582	0.616741	0.656549	0.581865	Psmb8/Psmb9	2
R-MMU-109581	Apoptosis	1/81	101/8582	0.618427	0.656549	0.581865	Tnfsf10	1
R-MMU-195721	Signaling by WNT	2/81	229/8582	0.64118	0.678382	0.601215	Psmb8/Psmb9	2
R-MMU-1257604	PIP3 activates AKT signaling	2/81	230/8582	0.643557	0.678581	0.601391	Psmb8/Psmb9	2
R-MMU-1483206	Glycerophospholipid biosynthesis	1/81	115/8582	0.666432	0.700319	0.620656	Etnppl	1
R-MMU-9006925	Intracellular signaling by second messengers	2/81	256/8582	0.701124	0.734285	0.650759	Psmb8/Psmb9	2
R-MMU-5673001	RAF/MAP kinase cascade	2/81	262/8582	0.713279	0.7445	0.659812	Psmb8/Psmb9	2
R-MMU-5357801	Programmed Cell Death	1/81	132/8582	0.716765	0.745628	0.660811	Tnfsf10	1
R-MMU-9006934	Signaling by Receptor Tyrosine Kinases	3/81	400/8582	0.735364	0.760914	0.674358	Vav3/Col6a1/Col6a2	3
R-MMU-418594	G alpha (i) signalling events	2/81	274/8582	0.736368	0.760914	0.674358	Rgs20/Rgs7	2
R-MMU-69620	Cell Cycle Checkpoints	2/81	277/8582	0.741892	0.764074	0.677159	Psmb8/Psmb9	2
R-MMU-199977	ER to Golgi Anterograde Transport	1/81	143/8582	0.745256	0.764997	0.677977	Col7a1	1
R-MMU-73894	DNA Repair	2/81	282/8582	0.750881	0.768228	0.68084	Isg15/Trim25	2
R-MMU-8978868	Fatty acid metabolism	1/81	163/8582	0.789991	0.805583	0.713946	Acsl5	1
R-MMU-948021	Transport to the Golgi and subsequent modification	1/81	171/8582	0.805628	0.818835	0.725691	Col7a1	1
R-MMU-1483257	Phospholipid metabolism	1/81	187/8582	0.833532	0.844427	0.748372	Etnppl	1
R-MMU-9709957	Sensory Perception	1/81	192/8582	0.841411	0.849633	0.752986	Apoe	1
R-MMU-68886	M Phase	2/81	382/8582	0.88176	0.887486	0.786532	Psmb8/Psmb9	2
R-MMU-69278	Cell Cycle Mitotic	2/81	498/8582	0.953451	0.956536	0.847728	Psmb8/Psmb9	2
R-MMU-500792	GPCR ligand binding	1/81	394/8582	0.978183	0.978183	0.866913	Ucn2	1

## Sheet: GO_DGEA_OPC
ID	Description	GeneRatio	BgRatio	pvalue	p.adjust	qvalue	geneID	Count	Significant
R-MMU-1236977	Endosomal/Vacuolar pathway	3/21	24/8582	2.47308e-05	0.00301139	0.00247828	H2-Q4/H2-Q7/H2-Q6	3	*
R-MMU-1236975	Antigen processing-Cross presentation	4/21	91/8582	6.16796e-05	0.00301139	0.00247828	H2-Q4/H2-Q7/Psmb8/H2-Q6	4	*
R-MMU-1236974	ER-Phagosome pathway	3/21	33/8582	6.57278e-05	0.00301139	0.00247828	H2-Q4/H2-Q7/H2-Q6	3	*
R-MMU-198933	Immunoregulatory interactions between a Lymphoid and a non-Lymphoid cell	4/21	95/8582	7.30035e-05	0.00301139	0.00247828	H2-Q4/H2-Q7/Icam1/H2-Q6	4	*
R-MMU-983170	Antigen Presentation: Folding assembly and peptide loading of class I MHC	3/21	40/8582	0.000117719	0.00344013	0.00283111	H2-Q4/H2-Q7/H2-Q6	3	*
R-MMU-983169	Class I MHC mediated antigen processing & presentation	6/21	342/8582	0.000125095	0.00344013	0.00283111	Dtx3l/H2-Q4/H2-Q7/Herc6/Psmb8/H2-Q6	6	*
R-MMU-2172127	DAP12 interactions	3/21	61/8582	0.000414875	0.00977919	0.00804794	H2-Q4/H2-Q7/H2-Q6	3	*
R-MMU-5610785	GLI3 is processed to GLI3R by the proteasome	2/21	57/8582	0.00839385	0.173123	0.142475	Gli3/Psmb8	2
R-MMU-216083	Integrin cell surface interactions	2/21	66/8582	0.0111331	0.204107	0.167973	Cd44/Icam1	2
R-MMU-5632684	Hedgehog 'on' state	2/21	81/8582	0.0164505	0.207987	0.171167	Gli3/Psmb8	2
R-MMU-1474244	Extracellular matrix organization	3/21	230/8582	0.0176922	0.207987	0.171167	Cd44/Icam1/A2m	3
R-MMU-202733	Cell surface interactions at the vascular wall	2/21	89/8582	0.0196511	0.207987	0.171167	Cd44/Cd74	2
R-MMU-1280215	Cytokine Signaling in Immune system	4/21	447/8582	0.0214505	0.207987	0.171167	Il1r1/Osmr/Psmb8/Tnfrsf1a	4
R-MMU-5668541	TNFR2 non-canonical NF-kB pathway	2/21	96/8582	0.0226495	0.207987	0.171167	Psmb8/Tnfrsf1a	2
R-MMU-9020702	Interleukin-1 signaling	2/21	102/8582	0.0253614	0.207987	0.171167	Il1r1/Psmb8	2
R-MMU-449147	Signaling by Interleukins	3/21	266/8582	0.0259129	0.207987	0.171167	Il1r1/Osmr/Psmb8	3
R-MMU-435354	Zinc transporters	1/21	11/8582	0.0266052	0.207987	0.171167	Slc39a14	1
R-MMU-1474228	Degradation of the extracellular matrix	2/21	106/8582	0.0272401	0.207987	0.171167	Cd44/A2m	2
R-MMU-5610787	Hedgehog 'off' state	2/21	106/8582	0.0272401	0.207987	0.171167	Gli3/Psmb8	2
R-MMU-2160916	Hyaluronan uptake and degradation	1/21	12/8582	0.0289901	0.207987	0.171167	Cd44	1
R-MMU-109582	Hemostasis	4/21	492/8582	0.0293283	0.207987	0.171167	Cd44/Cd74/A2m/Serpina3i	4
R-MMU-983168	Antigen processing: Ubiquitination & Proteasome degradation	3/21	285/8582	0.030961	0.207987	0.171167	Dtx3l/Herc6/Psmb8	3
R-MMU-8957275	Post-translational protein phosphorylation	2/21	114/8582	0.0311616	0.207987	0.171167	C4b/Shisa5	2
R-MMU-446652	Interleukin-1 family signaling	2/21	115/8582	0.0316669	0.207987	0.171167	Il1r1/Psmb8	2
R-MMU-114608	Platelet degranulation	2/21	117/8582	0.0326873	0.207987	0.171167	A2m/Serpina3i	2
R-MMU-1630316	Glycosaminoglycan metabolism	2/21	119/8582	0.0337207	0.207987	0.171167	Cd44/Ndst3	2
R-MMU-381426	Regulation of Insulin-like Growth Factor (IGF) transport and uptake by Insulin-like Growth Factor Binding Proteins (IGFBPs)	2/21	120/8582	0.0342422	0.207987	0.171167	C4b/Shisa5	2
R-MMU-76005	Response to elevated platelet cytosolic Ca2+	2/21	122/8582	0.0352948	0.207987	0.171167	A2m/Serpina3i	2
R-MMU-6788467	IL-6-type cytokine receptor ligand interactions	1/21	16/8582	0.0384743	0.217329	0.178855	Osmr	1
R-MMU-2142845	Hyaluronan metabolism	1/21	17/8582	0.0408316	0.217329	0.178855	Cd44	1
R-MMU-936964	Activation of IRF3 IRF7 mediated by TBK1 IKBKE	1/21	17/8582	0.0408316	0.217329	0.178855	Irf7	1
R-MMU-197264	Nicotinamide salvaging	1/21	18/8582	0.0431833	0.219406	0.180563	Parp14	1
R-MMU-5358351	Signaling by Hedgehog	2/21	138/8582	0.0441608	0.219406	0.180563	Gli3/Psmb8	2
R-MMU-8963898	Plasma lipoprotein assembly	1/21	19/8582	0.0455295	0.219406	0.180563	A2m	1
R-MMU-166663	Initial triggering of complement	1/21	20/8582	0.0478703	0.219406	0.180563	C4b	1
R-MMU-425410	Metal ion SLC transporters	1/21	20/8582	0.0478703	0.219406	0.180563	Slc39a14	1
R-MMU-140837	Intrinsic Pathway of Fibrin Clot Formation	1/21	21/8582	0.0502056	0.22389	0.184254	A2m	1
R-MMU-6783589	Interleukin-6 family signaling	1/21	22/8582	0.0525354	0.228114	0.18773	Osmr	1
R-MMU-5357786	TNFR1-induced proapoptotic signaling	1/21	23/8582	0.0548598	0.232099	0.19101	Tnfrsf1a	1
R-MMU-5669034	TNFs bind their physiological receptors	1/21	25/8582	0.0594923	0.245406	0.201961	Tnfrsf1a	1
R-MMU-2022928	HS-GAG biosynthesis	1/21	28/8582	0.0664005	0.266188	0.219064	Ndst3	1
R-MMU-1834949	Cytosolic sensors of pathogen-associated DNA	1/21	30/8582	0.0709791	0.266188	0.219064	Irf7	1
R-MMU-196807	Nicotinate metabolism	1/21	30/8582	0.0709791	0.266188	0.219064	Parp14	1
R-MMU-168928	DDX58/IFIH1-mediated induction of interferon-alpha/beta	1/21	32/8582	0.0755363	0.266188	0.219064	Irf7	1
R-MMU-5357956	TNFR1-induced NF-kappa-B signaling pathway	1/21	32/8582	0.0755363	0.266188	0.219064	Tnfrsf1a	1
R-MMU-140877	Formation of Fibrin Clot (Clotting Cascade)	1/21	36/8582	0.0845869	0.266188	0.219064	A2m	1
R-MMU-977606	Regulation of Complement cascade	1/21	36/8582	0.0845869	0.266188	0.219064	C4b	1
R-MMU-166658	Complement cascade	1/21	46/8582	0.106846	0.266188	0.219064	C4b	1
R-MMU-5357905	Regulation of TNFR1 signaling	1/21	47/8582	0.109043	0.266188	0.219064	Tnfrsf1a	1
R-MMU-1236978	Cross-presentation of soluble exogenous antigens (endosomes)	1/21	49/8582	0.113422	0.266188	0.219064	Psmb8	1
R-MMU-350562	Regulation of ornithine decarboxylase (ODC)	1/21	51/8582	0.117781	0.266188	0.219064	Psmb8	1
R-MMU-75815	Ubiquitin-dependent degradation of Cyclin D	1/21	51/8582	0.117781	0.266188	0.219064	Psmb8	1
R-MMU-9762114	GSK3B and BTRC:CUL1-mediated-degradation of NFE2L2	1/21	51/8582	0.117781	0.266188	0.219064	Psmb8	1
R-MMU-1638091	Heparan sulfate/heparin (HS-GAG) metabolism	1/21	52/8582	0.119953	0.266188	0.219064	Ndst3	1
R-MMU-349425	Autodegradation of the E3 ubiquitin ligase COP1	1/21	52/8582	0.119953	0.266188	0.219064	Psmb8	1
R-MMU-69601	Ubiquitin Mediated Degradation of Phosphorylated Cdc25A	1/21	52/8582	0.119953	0.266188	0.219064	Psmb8	1
R-MMU-69610	p53-Independent DNA Damage Response	1/21	52/8582	0.119953	0.266188	0.219064	Psmb8	1
R-MMU-69613	p53-Independent G1/S DNA damage checkpoint	1/21	52/8582	0.119953	0.266188	0.219064	Psmb8	1
R-MMU-8939902	Regulation of RUNX2 expression and activity	1/21	52/8582	0.119953	0.266188	0.219064	Psmb8	1
R-MMU-76002	Platelet activation signaling and aggregation	2/21	246/8582	0.120413	0.266188	0.219064	A2m/Serpina3i	2
R-MMU-8941858	Regulation of RUNX3 expression and activity	1/21	53/8582	0.122119	0.266188	0.219064	Psmb8	1
R-MMU-8854050	FBXL7 down-regulates AURKA during mitotic entry and in early mitosis	1/21	54/8582	0.124281	0.266188	0.219064	Psmb8	1
R-MMU-4641257	Degradation of AXIN	1/21	55/8582	0.126437	0.266188	0.219064	Psmb8	1
R-MMU-9759194	Nuclear events mediated by NFE2L2	1/21	55/8582	0.126437	0.266188	0.219064	Psmb8	1
R-MMU-450408	AUF1 (hnRNP D0) binds and destabilizes mRNA	1/21	56/8582	0.128589	0.266188	0.219064	Psmb8	1
R-MMU-5610780	Degradation of GLI1 by the proteasome	1/21	56/8582	0.128589	0.266188	0.219064	Psmb8	1
R-MMU-69541	Stabilization of p53	1/21	56/8582	0.128589	0.266188	0.219064	Psmb8	1
R-MMU-75893	TNF signaling	1/21	56/8582	0.128589	0.266188	0.219064	Tnfrsf1a	1
R-MMU-4641258	Degradation of DVL	1/21	57/8582	0.130735	0.266188	0.219064	Psmb8	1
R-MMU-5607761	Dectin-1 mediated noncanonical NF-kB signaling	1/21	57/8582	0.130735	0.266188	0.219064	Psmb8	1
R-MMU-5676590	NIK-->noncanonical NF-kB signaling	1/21	57/8582	0.130735	0.266188	0.219064	Psmb8	1
R-MMU-71387	Metabolism of carbohydrates	2/21	263/8582	0.134348	0.266188	0.219064	Cd44/Ndst3	2
R-MMU-351202	Metabolism of polyamines	1/21	59/8582	0.135012	0.266188	0.219064	Psmb8	1
R-MMU-187577	SCF(Skp2)-mediated degradation of p27/p21	1/21	60/8582	0.137144	0.266188	0.219064	Psmb8	1
R-MMU-4608870	Asymmetric localization of PCP proteins	1/21	62/8582	0.141391	0.266188	0.219064	Psmb8	1
R-MMU-1169091	Activation of NF-kappaB in B cells	1/21	63/8582	0.143508	0.266188	0.219064	Psmb8	1
R-MMU-5358346	Hedgehog ligand biogenesis	1/21	63/8582	0.143508	0.266188	0.219064	Psmb8	1
R-MMU-8878166	Transcriptional regulation by RUNX2	1/21	63/8582	0.143508	0.266188	0.219064	Psmb8	1
R-MMU-174084	Autodegradation of Cdh1 by Cdh1:APC/C	1/21	64/8582	0.145619	0.266188	0.219064	Psmb8	1
R-MMU-174824	Plasma lipoprotein assembly remodeling and clearance	1/21	64/8582	0.145619	0.266188	0.219064	A2m	1
R-MMU-69563	p53-Dependent G1 DNA Damage Response	1/21	64/8582	0.145619	0.266188	0.219064	Psmb8	1
R-MMU-69580	p53-Dependent G1/S DNA damage checkpoint	1/21	64/8582	0.145619	0.266188	0.219064	Psmb8	1
R-MMU-1234176	Oxygen-dependent proline hydroxylation of Hypoxia-inducible Factor Alpha	1/21	66/8582	0.149827	0.266188	0.219064	Psmb8	1
R-MMU-69615	G1/S DNA Damage Checkpoints	1/21	66/8582	0.149827	0.266188	0.219064	Psmb8	1
R-MMU-8939236	RUNX1 regulates transcription of genes involved in differentiation of HSCs	1/21	66/8582	0.149827	0.266188	0.219064	Psmb8	1
R-MMU-5658442	Regulation of RAS by GAPs	1/21	67/8582	0.151923	0.266188	0.219064	Psmb8	1
R-MMU-174154	APC/C:Cdc20 mediated degradation of Securin	1/21	68/8582	0.154015	0.266188	0.219064	Psmb8	1
R-MMU-8948751	Regulation of PTEN stability and activity	1/21	68/8582	0.154015	0.266188	0.219064	Psmb8	1
R-MMU-1234174	Cellular response to hypoxia	1/21	70/8582	0.158183	0.266188	0.219064	Psmb8	1
R-MMU-425366	Transport of bile salts and organic acids metal ions and amine compounds	1/21	70/8582	0.158183	0.266188	0.219064	Slc39a14	1
R-MMU-68949	Orc1 removal from chromatin	1/21	70/8582	0.158183	0.266188	0.219064	Psmb8	1
R-MMU-69202	Cyclin E associated events during G1/S transition	1/21	70/8582	0.158183	0.266188	0.219064	Psmb8	1
R-MMU-69656	Cyclin A:Cdk2-associated events at S phase entry	1/21	72/8582	0.162332	0.266188	0.219064	Psmb8	1
R-MMU-174184	Cdc20:Phospho-APC/C mediated degradation of Cyclin A	1/21	73/8582	0.164399	0.266188	0.219064	Psmb8	1
R-MMU-5687128	MAPK6/MAPK4 signaling	1/21	73/8582	0.164399	0.266188	0.219064	Psmb8	1
R-MMU-69017	CDK-mediated phosphorylation and removal of Cdc6	1/21	73/8582	0.164399	0.266188	0.219064	Psmb8	1
R-MMU-174178	APC/C:Cdh1 mediated degradation of Cdc20 and other APC/C:Cdh1 targeted proteins in late mitosis/early G1	1/21	74/8582	0.166461	0.266188	0.219064	Psmb8	1
R-MMU-179419	APC:Cdc20 mediated degradation of cell cycle proteins prior to satisfation of the cell cycle checkpoint	1/21	74/8582	0.166461	0.266188	0.219064	Psmb8	1
R-MMU-1168372	Downstream signaling events of B Cell Receptor (BCR)	1/21	75/8582	0.168519	0.266188	0.219064	Psmb8	1
R-MMU-8852276	The role of GTSE1 in G2/M progression after G2 checkpoint	1/21	75/8582	0.168519	0.266188	0.219064	Psmb8	1
R-MMU-168164	Toll Like Receptor 3 (TLR3) Cascade	1/21	76/8582	0.170571	0.266188	0.219064	Irf7	1
R-MMU-176409	APC/C:Cdc20 mediated degradation of mitotic proteins	1/21	76/8582	0.170571	0.266188	0.219064	Psmb8	1
R-MMU-8878159	Transcriptional regulation by RUNX3	1/21	76/8582	0.170571	0.266188	0.219064	Psmb8	1
R-MMU-176814	Activation of APC/C and APC/C:Cdc20 mediated degradation of mitotic proteins	1/21	77/8582	0.172619	0.266188	0.219064	Psmb8	1
R-MMU-195253	Degradation of beta-catenin by the destruction complex	1/21	77/8582	0.172619	0.266188	0.219064	Psmb8	1
R-MMU-2871837	FCERI mediated NF-kB activation	1/21	77/8582	0.172619	0.266188	0.219064	Psmb8	1
R-MMU-9755511	KEAP1-NFE2L2 pathway	1/21	77/8582	0.172619	0.266188	0.219064	Psmb8	1
R-MMU-68867	Assembly of the pre-replicative complex	1/21	82/8582	0.182786	0.276674	0.227693	Psmb8	1
R-MMU-975155	MyD88 dependent cascade initiated on endosome	1/21	84/8582	0.186819	0.276674	0.227693	Irf7	1
R-MMU-168181	Toll Like Receptor 7/8 (TLR7/8) Cascade	1/21	85/8582	0.188828	0.276674	0.227693	Irf7	1
R-MMU-202424	Downstream TCR signaling	1/21	85/8582	0.188828	0.276674	0.227693	Psmb8	1
R-MMU-450531	Regulation of mRNA stability by proteins that bind AU-rich elements	1/21	85/8582	0.188828	0.276674	0.227693	Psmb8	1
R-MMU-174143	APC/C-mediated degradation of cell cycle proteins	1/21	87/8582	0.192833	0.276674	0.227693	Psmb8	1
R-MMU-4086400	PCP/CE pathway	1/21	87/8582	0.192833	0.276674	0.227693	Psmb8	1
R-MMU-453276	Regulation of mitotic cell cycle	1/21	87/8582	0.192833	0.276674	0.227693	Psmb8	1
R-MMU-168138	Toll Like Receptor 9 (TLR9) Cascade	1/21	89/8582	0.196819	0.279958	0.230396	Irf7	1
R-MMU-5607764	CLEC7A (Dectin-1) signaling	1/21	90/8582	0.198805	0.280366	0.230732	Psmb8	1
R-MMU-69052	Switching of origins to a post-replicative state	1/21	91/8582	0.200786	0.280761	0.231057	Psmb8	1
R-MMU-166166	MyD88-independent TLR4 cascade	1/21	95/8582	0.208665	0.286914	0.236121	Irf7	1
R-MMU-937061	TRIF(TICAM1)-mediated TLR4 signaling	1/21	95/8582	0.208665	0.286914	0.236121	Irf7	1
R-MMU-5689603	UCH proteinases	1/21	96/8582	0.210623	0.287213	0.236367	Psmb8	1
R-MMU-69002	DNA Replication Pre-Initiation	1/21	97/8582	0.212576	0.287501	0.236604	Psmb8	1
R-MMU-382556	ABC-family proteins mediated transport	1/21	99/8582	0.21647	0.290386	0.238978	Psmb8	1
R-MMU-983705	Signaling by the B Cell Receptor (BCR)	1/21	100/8582	0.218409	0.290625	0.239175	Psmb8	1
R-MMU-202403	TCR signaling	1/21	102/8582	0.222275	0.291285	0.239717	Psmb8	1
R-MMU-2132295	MHC class II antigen presentation	1/21	103/8582	0.224201	0.291285	0.239717	Cd74	1
R-MMU-69206	G1/S Transition	1/21	103/8582	0.224201	0.291285	0.239717	Psmb8	1
R-MMU-5621481	C-type lectin receptors (CLRs)	1/21	108/8582	0.233763	0.301335	0.247988	Psmb8	1
R-MMU-196849	Metabolism of water-soluble vitamins and cofactors	1/21	110/8582	0.237556	0.301592	0.2482	Parp14	1
R-MMU-166016	Toll Like Receptor 4 (TLR4) Cascade	1/21	111/8582	0.239446	0.301592	0.2482	Irf7	1
R-MMU-6807070	PTEN Regulation	1/21	111/8582	0.239446	0.301592	0.2482	Psmb8	1
R-MMU-69239	Synthesis of DNA	1/21	116/8582	0.248829	0.311036	0.255972	Psmb8	1
R-MMU-2454202	Fc epsilon receptor (FCERI) signaling	1/21	118/8582	0.252551	0.313315	0.257848	Psmb8	1
R-MMU-69306	DNA Replication	1/21	123/8582	0.26178	0.322193	0.265154	Psmb8	1
R-MMU-3858494	Beta-catenin independent WNT signaling	1/21	124/8582	0.263612	0.322193	0.265154	Psmb8	1
R-MMU-453279	Mitotic G1 phase and G1/S transition	1/21	127/8582	0.269084	0.326463	0.268668	Psmb8	1
R-MMU-73887	Death Receptor Signaling	1/21	135/8582	0.283488	0.341427	0.280983	Tnfrsf1a	1
R-MMU-168898	Toll-like Receptor Cascades	1/21	139/8582	0.290588	0.347442	0.285933	Irf7	1
R-MMU-69242	S Phase	1/21	143/8582	0.297621	0.353291	0.290747	Psmb8	1
R-MMU-201681	TCF dependent signaling in response to WNT	1/21	150/8582	0.309769	0.365085	0.300453	Psmb8	1
R-MMU-9711123	Cellular response to chemical stress	1/21	158/8582	0.323408	0.37775	0.310876	Psmb8	1
R-MMU-69481	G2/M Checkpoints	1/21	159/8582	0.325094	0.37775	0.310876	Psmb8	1
R-MMU-196854	Metabolism of vitamins and cofactors	1/21	169/8582	0.341742	0.394318	0.32451	Parp14	1
R-MMU-69275	G2/M Transition	1/21	175/8582	0.351542	0.402809	0.331498	Psmb8	1
R-MMU-453274	Mitotic G2-G2/M phases	1/21	177/8582	0.354778	0.403713	0.332242	Psmb8	1
R-MMU-5689880	Ub-specific processing proteases	1/21	181/8582	0.361203	0.407225	0.335132	Psmb8	1
R-MMU-2467813	Separation of Sister Chromatids	1/21	182/8582	0.3628	0.407225	0.335132	Psmb8	1
R-MMU-8878171	Transcriptional regulation by RUNX1	1/21	190/8582	0.375438	0.418563	0.344463	Psmb8	1
R-MMU-425407	SLC-mediated transmembrane transport	1/21	218/8582	0.417819	0.456723	0.375867	Slc39a14	1
R-MMU-68882	Mitotic Anaphase	1/21	218/8582	0.417819	0.456723	0.375867	Psmb8	1
R-MMU-2555396	Mitotic Metaphase and Anaphase	1/21	219/8582	0.41928	0.456723	0.375867	Psmb8	1
R-MMU-8951664	Neddylation	1/21	220/8582	0.420738	0.456723	0.375867	Psmb8	1
R-MMU-195721	Signaling by WNT	1/21	229/8582	0.433706	0.466211	0.383676	Psmb8	1
R-MMU-1257604	PIP3 activates AKT signaling	1/21	230/8582	0.43513	0.466211	0.383676	Psmb8	1
R-MMU-5688426	Deubiquitination	1/21	246/8582	0.457451	0.486964	0.400755	Psmb8	1
R-MMU-71291	Metabolism of amino acids and derivatives	1/21	249/8582	0.461541	0.488169	0.401747	Psmb8	1
R-MMU-9006925	Intracellular signaling by second messengers	1/21	256/8582	0.470972	0.494971	0.407344	Psmb8	1
R-MMU-5673001	RAF/MAP kinase cascade	1/21	262/8582	0.47893	0.500149	0.411606	Psmb8	1
R-MMU-5684996	MAPK1/MAPK3 signaling	1/21	268/8582	0.486774	0.505143	0.415716	Psmb8	1
R-MMU-69620	Cell Cycle Checkpoints	1/21	277/8582	0.498329	0.513902	0.422924	Psmb8	1
R-MMU-5683057	MAPK family signaling cascades	1/21	291/8582	0.515813	0.528628	0.435044	Psmb8	1
R-MMU-68886	M Phase	1/21	382/8582	0.616084	0.627493	0.516406	Psmb8	1
R-MMU-2262752	Cellular responses to stress	1/21	440/8582	0.669311	0.675961	0.556293	Psmb8	1
R-MMU-8953897	Cellular responses to stimuli	1/21	443/8582	0.671864	0.675961	0.556293	Psmb8	1
R-MMU-69278	Cell Cycle Mitotic	1/21	498/8582	0.715464	0.715464	0.588803	Psmb8	1
