# Supplementary material for: Distinct transcriptomic and epigenomic responses of mature oligodendrocytes during disease progression in a mouse model of multiple sclerosis
Source: Nat Neurosci. 2025 Nov 17;28(12):2612–27. doi: 10.1038/s41593-025-02100-3 (PMC12672374; doi:10.1038/s41593-025-02100-3)
Supplement: Supplementary file 11 — Damage- and IFN-associated genes. [file 41593_2025_2100_MOESM11_ESM.xlsx]

## Sheet: Summary
Supplementary Table 9. Damage and interferon-associated genes
Literature dataset
Genes list extracted from Supplementary Table 3 : Kaya, T., et al. CD8(+) T cells induce interferon-responsive oligodendrocytes and microglia in white matter aging. Nat Neurosci 25, 1446-1457 (2022).
Acronyms
ARO	Markers of age-related oligodendrocytes (called damage-associated in our study)
IRO	Markers of interferon-responsive oligodendrocytes (called interferon-associated in our study)

## Sheet: Genes
Bcl3	ARO
Socs3	ARO
Plvap	ARO
Serpina3n	ARO
Fos	ARO
Flnc	ARO
Anxa2	ARO
Cebpb	ARO
Steap3	ARO
Junb	ARO
Fxyd1	ARO
Tagln2	ARO
Vim	ARO
Cebpd	ARO
Ssbp4	ARO
Rnase4	ARO
C4b	ARO
Trib1	ARO
Naprt	ARO
Fxyd7	ARO
Lgi4	ARO
Emp3	ARO
Pros1	ARO
Rab3b	ARO
Cd44	ARO
Snx10	ARO
Gas6	ARO
Gadd45a	ARO
Abcc4	ARO
Itih5	ARO
Cela1	ARO
Gadd45b	ARO
Pfkfb4	ARO
Pcdhb9	ARO
Cadps2	ARO
Rhoj	ARO
Adam11	ARO
Cacng5	ARO
Masp1	ARO
Parp3	ARO
Cmbl	ARO
Piezo2	ARO
Nrtn	ARO
7630403G23Rik	ARO
Itgb5	ARO
Irf2bpl	ARO
Bbc3	ARO
Sbno2	ARO
Ccdc136	ARO
Kcnab1	ARO
Diaph1	ARO
Rassf4	ARO
Anxa4	ARO
Plp2	ARO
Sparc	ARO
Amacr	ARO
Myc	ARO
Stat3	ARO
Klf10	ARO
Tamalin	ARO
Nupr1	ARO
Slc9a3r2	ARO
Syne2	ARO
Rbms1	ARO
Arhgap15	ARO
Sspo	ARO
Nol3	ARO
Tspo	ARO
Foxj1	ARO
Aldh1l2	ARO
Thbs3	ARO
Irf1	ARO
Cdh8	ARO
Tmc3	ARO
Tpk1	ARO
Gas2l1	ARO
Mvp	ARO
Lbh	ARO
Slc39a14	ARO
Garnl3	ARO
Cmip	ARO
Fam20c	ARO
Map3k5	ARO
Zfp579	ARO
Flot1	ARO
Gfap	ARO
Crnde	ARO
Tram2	ARO
Vwa5a	ARO
Col9a3	ARO
Slc4a8	ARO
Adam9	ARO
Tubg2	ARO
Dync1i1	ARO
Stard10	ARO
Neat1	ARO
H2-D1	IRO
H2-K1	IRO
Ifit3	IRO
Ifit1	IRO
Usp18	IRO
Ifi27l2a	IRO
H2-T23	IRO
Irf7	IRO
Igtp	IRO
Rsad2	IRO
Gbp7	IRO
Gbp3	IRO
Tap1	IRO
Ifih1	IRO
Bst2	IRO
Rtp4	IRO
Ddx58	IRO
Eif2ak2	IRO
Psmb8	IRO
Zc3hav1	IRO
Irgm1	IRO
B2m	IRO
Irf9	IRO
Stat1	IRO
Ifit3b	IRO
Gm20257	IRO
Ifi27	IRO
Pard6g	IRO
Gm48249	IRO
