# Supplementary material for: Distinct transcriptomic and epigenomic responses of mature oligodendrocytes during disease progression in a mouse model of multiple sclerosis
Source: Nat Neurosci. 2025 Nov 17;28(12):2612–27. doi: 10.1038/s41593-025-02100-3 (PMC12672374; doi:10.1038/s41593-025-02100-3)
Supplement: Supplementary file 12 — qPCR primer sequences. [file 41593_2025_2100_MOESM12_ESM.xlsx]

## Sheet: Summary
Supplementary Table 10. qPCR primer sequences
Naming of the sheets
PCR primers Immune	Primer sequences targeting immune genes to capture IFN-γ treatment
PCR primers TF	Primer sequences targeting transcription factor Stat3 and its associated gene CD274
All sequences are given in forward (F) and reverse (R) strands.

## Sheet: PCR primers Immune
Nlrc5-F	5′-CCGTGGTACTCACATTTGCC-3′
Nlrc5-R	5′-CCTTCGAGATCTCTGGGACA-3′
H2-D1-F	5′-TCGGCTATGTGGACAACAAGG-3′
H2-D1-R	5′-GGCCATAGCTCCAAGGACAC-3′
B2m-F	5′-TTCTGGTGCTTGTCTCACTGA-3′
B2m-R	5′-CAGTATGTTCGGCTTCCCATTC-3′
Ciita-F	5′-CTGGCACAGGTCTCTCCAGT-3′
Ciita-R	5′-TACTGAGGCTGCTTGAAGGG-3′
H2-ab1-F	5′-GCAGACACAACTACGAGGGG-3′
H2-ab1-R	5′-AGTGTTGTGGTGGTTGAGGG-3′
H2-Aa-F	5′-GCTCAGCCTCTGTGGAGGT-3′
H2-Aa-R	5′-TGTACTGGCCAATGTCTCCA-3′
Gapdh-F	5′-GAGAAACCTGCCAAGTA-3′
Gapdh-R	5′-AGACAACCTGGTCCTCA -3′

## Sheet: PCR primers TF
CD274-F	5′-AGTATGGCAGCAACGTCACG-3′
CD274-R	5′-TCCTTTTCCCAGTACACCACTA-3′
Stat3-F	5′-ACATCTGCCTGGACCGTCT-3′
Stat3-R	5′-TTAATTTGTTGGCGGGTCTG-3′
